# Supplementary material for: Global, Regional, and National Levels and Trends in Burden of Dental Caries and Periodontal Disease from 1990 to 2035：Result From the Global Burden of Disease Study 2021
Source: Research Square preprint supplement (doi:10.21203/rs.3.rs-5609270/v1), 2025-04-02
Supplement: Supplementary file 1 [file 093966e7a9cfed9b835e69c8.xlsx]

## Sheet: Sheet1
Exported data
	measure_id	measure_name	location_id	location_name	sex_id	sex_name	age_id	age_name	cause_id	cause_name	metric_id	metric_name	year_start	year_end	val	upper	lower
1	5	Prevalence	9	Southeast Asia	3	Both	27	Age-standardized	681	Caries of deciduous teeth	3	Rate	1990	2021	-2.70186	-0.858189	-4.54736
2	5	Prevalence	7	Democratic People's Republic of Korea	3	Both	27	Age-standardized	681	Caries of deciduous teeth	3	Rate	1990	2021	-1.75565	4.34628	-7.85271
3	5	Prevalence	31	Central Europe, Eastern Europe, and Central Asia	3	Both	27	Age-standardized	681	Caries of deciduous teeth	3	Rate	1990	2021	-3.44186	-1.66997	-5.07147
4	5	Prevalence	1	Global	3	Both	27	Age-standardized	681	Caries of deciduous teeth	3	Rate	1990	2021	-6.87601	2.31822	-13.9226
5	5	Prevalence	20	Socialist Republic of Viet Nam	3	Both	27	Age-standardized	681	Caries of deciduous teeth	3	Rate	1990	2021	-2.13164	10.3583	-10.7664
6	5	Prevalence	18	Kingdom of Thailand	3	Both	27	Age-standardized	681	Caries of deciduous teeth	3	Rate	1990	2021	-11.563	-3.17153	-18.3674
7	5	Prevalence	62	Russian Federation	3	Both	27	Age-standardized	681	Caries of deciduous teeth	3	Rate	1990	2021	0.392452	4.35162	-2.89814
8	5	Prevalence	29	Kingdom of Tonga	3	Both	27	Age-standardized	681	Caries of deciduous teeth	3	Rate	1990	2021	-1.34057	4.56809	-7.76517
9	5	Prevalence	40	Turkmenistan	3	Both	27	Age-standardized	681	Caries of deciduous teeth	3	Rate	1990	2021	-0.927766	4.01596	-6.67928
10	5	Prevalence	5	East Asia	3	Both	27	Age-standardized	681	Caries of deciduous teeth	3	Rate	1990	2021	-5.02491	-0.490591	-9.12879
11	5	Prevalence	51	Republic of Poland	3	Both	27	Age-standardized	681	Caries of deciduous teeth	3	Rate	1990	2021	-3.37394	-0.580695	-6.19776
12	5	Prevalence	71	Australia	3	Both	27	Age-standardized	681	Caries of deciduous teeth	3	Rate	1990	2021	126.925	162.092	91.6315
13	5	Prevalence	104	Caribbean	3	Both	27	Age-standardized	681	Caries of deciduous teeth	3	Rate	1990	2021	-7.28746	12.1446	-22.3508
14	5	Prevalence	60	Republic of Lithuania	3	Both	27	Age-standardized	681	Caries of deciduous teeth	3	Rate	1990	2021	-25.8002	-12.8454	-37.3146
15	5	Prevalence	84	Ireland	3	Both	27	Age-standardized	681	Caries of deciduous teeth	3	Rate	1990	2021	2.38783	18.7406	-9.86586
16	5	Prevalence	27	Independent State of Samoa	3	Both	27	Age-standardized	681	Caries of deciduous teeth	3	Rate	1990	2021	-0.533949	5.45725	-5.7836
17	5	Prevalence	93	Kingdom of Sweden	3	Both	27	Age-standardized	681	Caries of deciduous teeth	3	Rate	1990	2021	-1.00362	7.95594	-12.2638
18	5	Prevalence	73	Western Europe	3	Both	27	Age-standardized	681	Caries of deciduous teeth	3	Rate	1990	2021	-17.3104	-10.4688	-24.198
19	5	Prevalence	38	Mongolia	3	Both	27	Age-standardized	681	Caries of deciduous teeth	3	Rate	1990	2021	-1.73684	3.63192	-7.6466
20	5	Prevalence	82	Hellenic Republic	3	Both	27	Age-standardized	681	Caries of deciduous teeth	3	Rate	1990	2021	-50.3443	-39.549	-60.3168
21	5	Prevalence	95	United Kingdom of Great Britain and Northern Ireland	3	Both	27	Age-standardized	681	Caries of deciduous teeth	3	Rate	1990	2021	-26.0509	-12.5546	-37.4918
22	5	Prevalence	49	North Macedonia	3	Both	27	Age-standardized	681	Caries of deciduous teeth	3	Rate	1990	2021	-14.1004	-3.61048	-26.6322
23	5	Prevalence	159	South Asia	3	Both	27	Age-standardized	681	Caries of deciduous teeth	3	Rate	1990	2021	-7.52711	6.68842	-17.5265
24	5	Prevalence	16	Republic of the Philippines	3	Both	27	Age-standardized	681	Caries of deciduous teeth	3	Rate	1990	2021	-6.87961	-2.22315	-10.5734
25	5	Prevalence	25	Federated States of Micronesia	3	Both	27	Age-standardized	681	Caries of deciduous teeth	3	Rate	1990	2021	-1.97988	3.92272	-9.06296
26	5	Prevalence	157	Yemen	3	Both	27	Age-standardized	681	Caries of deciduous teeth	3	Rate	1990	2021	-7.12306	33.6967	-32.9356
27	5	Prevalence	102	United States of America	3	Both	27	Age-standardized	681	Caries of deciduous teeth	3	Rate	1990	2021	20.6418	38.4984	7.65359
28	5	Prevalence	168	Angola	3	Both	27	Age-standardized	681	Caries of deciduous teeth	3	Rate	1990	2021	-25.5394	8.93079	-49.3721
29	5	Prevalence	126	Republic of Costa Rica	3	Both	27	Age-standardized	681	Caries of deciduous teeth	3	Rate	1990	2021	-2.17836	3.80536	-7.56305
30	5	Prevalence	124	Central Latin America	3	Both	27	Age-standardized	681	Caries of deciduous teeth	3	Rate	1990	2021	-0.00584983	17.1219	-10.7618
31	5	Prevalence	148	Morocco	3	Both	27	Age-standardized	681	Caries of deciduous teeth	3	Rate	1990	2021	-8.73496	28.0811	-33.6967
32	5	Prevalence	69	Republic of Singapore	3	Both	27	Age-standardized	681	Caries of deciduous teeth	3	Rate	1990	2021	-14.3992	-5.67147	-24.1506
33	5	Prevalence	56	Eastern Europe	3	Both	27	Age-standardized	681	Caries of deciduous teeth	3	Rate	1990	2021	-0.627005	2.24663	-3.16088
34	5	Prevalence	14	Republic of Maldives	3	Both	27	Age-standardized	681	Caries of deciduous teeth	3	Rate	1990	2021	-2.52141	3.36243	-8.3254
35	5	Prevalence	91	Portuguese Republic	3	Both	27	Age-standardized	681	Caries of deciduous teeth	3	Rate	1990	2021	-6.84257	-1.05692	-11.9353
36	5	Prevalence	135	Federative Republic of Brazil	3	Both	27	Age-standardized	681	Caries of deciduous teeth	3	Rate	1990	2021	6.99001	13.2719	1.6481
37	5	Prevalence	137	North Africa and Middle East	3	Both	27	Age-standardized	681	Caries of deciduous teeth	3	Rate	1990	2021	-5.99323	20.8007	-23.9119
38	5	Prevalence	146	Lebanon	3	Both	27	Age-standardized	681	Caries of deciduous teeth	3	Rate	1990	2021	-8.01549	33.681	-34.9685
39	5	Prevalence	58	Republic of Estonia	3	Both	27	Age-standardized	681	Caries of deciduous teeth	3	Rate	1990	2021	-1.8228	5.72798	-7.61531
40	5	Prevalence	113	Republic of Guyana	3	Both	27	Age-standardized	681	Caries of deciduous teeth	3	Rate	1990	2021	-2.44468	3.15323	-8.7957
41	5	Prevalence	12	Lao People's Democratic Republic	3	Both	27	Age-standardized	681	Caries of deciduous teeth	3	Rate	1990	2021	-3.0455	2.53544	-9.14053
42	5	Prevalence	80	French Republic	3	Both	27	Age-standardized	681	Caries of deciduous teeth	3	Rate	1990	2021	-12.5286	15.8041	-41.0102
43	5	Prevalence	166	Sub-Saharan Africa	3	Both	27	Age-standardized	681	Caries of deciduous teeth	3	Rate	1990	2021	-6.19707	6.63238	-15.5432
44	5	Prevalence	78	Kingdom of Denmark	3	Both	27	Age-standardized	681	Caries of deciduous teeth	3	Rate	1990	2021	-27.531	-10.7053	-48.3899
45	5	Prevalence	23	Republic of Kiribati	3	Both	27	Age-standardized	681	Caries of deciduous teeth	3	Rate	1990	2021	-0.0921977	6.36255	-5.94836
46	5	Prevalence	115	Jamaica	3	Both	27	Age-standardized	681	Caries of deciduous teeth	3	Rate	1990	2021	-1.10561	5.5725	-7.69729
47	5	Prevalence	45	Republic of Bulgaria	3	Both	27	Age-standardized	681	Caries of deciduous teeth	3	Rate	1990	2021	-0.378559	7.69725	-8.99578
48	5	Prevalence	89	Kingdom of the Netherlands	3	Both	27	Age-standardized	681	Caries of deciduous teeth	3	Rate	1990	2021	14.087	61.6261	-17.7735
49	5	Prevalence	47	Czech Republic	3	Both	27	Age-standardized	681	Caries of deciduous teeth	3	Rate	1990	2021	-0.777437	6.14356	-6.14542
50	5	Prevalence	122	Republic of Ecuador	3	Both	27	Age-standardized	681	Caries of deciduous teeth	3	Rate	1990	2021	-15.7501	0.56656	-28.5788
51	5	Prevalence	34	Republic of Azerbaijan	3	Both	27	Age-standardized	681	Caries of deciduous teeth	3	Rate	1990	2021	-0.594962	4.9408	-5.56143
52	5	Prevalence	244	South Asia - WB	3	Both	27	Age-standardized	681	Caries of deciduous teeth	3	Rate	1990	2021	-7.4414	7.34108	-17.723
53	5	Prevalence	36	Republic of Kazakhstan	3	Both	27	Age-standardized	681	Caries of deciduous teeth	3	Rate	1990	2021	0.00654632	6.65444	-4.60487
54	5	Prevalence	155	Turkey	3	Both	27	Age-standardized	681	Caries of deciduous teeth	3	Rate	1990	2021	-2.02162	6.61632	-8.72528
55	5	Prevalence	144	Hashemite Kingdom of Jordan	3	Both	27	Age-standardized	681	Caries of deciduous teeth	3	Rate	1990	2021	3.22414	25.9142	-16.8682
56	5	Prevalence	109	Republic of Cuba	3	Both	27	Age-standardized	681	Caries of deciduous teeth	3	Rate	1990	2021	-10.2531	22.5953	-34.2499
57	5	Prevalence	133	Bolivarian Republic of Venezuela	3	Both	27	Age-standardized	681	Caries of deciduous teeth	3	Rate	1990	2021	-12.6661	26.1067	-39.4049
58	5	Prevalence	67	Japan	3	Both	27	Age-standardized	681	Caries of deciduous teeth	3	Rate	1990	2021	-21.3979	-7.72205	-32.2643
59	5	Prevalence	98	Republic of Chile	3	Both	27	Age-standardized	681	Caries of deciduous teeth	3	Rate	1990	2021	-2.96625	7.3373	-11.8847
60	5	Prevalence	100	High-income North America	3	Both	27	Age-standardized	681	Caries of deciduous teeth	3	Rate	1990	2021	20.0803	35.7962	8.43285
61	5	Prevalence	153	Syrian Arab Republic	3	Both	27	Age-standardized	681	Caries of deciduous teeth	3	Rate	1990	2021	-11.2134	24.8597	-38.1026
62	5	Prevalence	131	Republic of Nicaragua	3	Both	27	Age-standardized	681	Caries of deciduous teeth	3	Rate	1990	2021	-13.2106	26.6158	-40.4238
63	5	Prevalence	111	Dominican Republic	3	Both	27	Age-standardized	681	Caries of deciduous teeth	3	Rate	1990	2021	-3.50151	3.16836	-10.3367
64	5	Prevalence	43	Republic of Albania	3	Both	27	Age-standardized	681	Caries of deciduous teeth	3	Rate	1990	2021	0.380378	9.22111	-7.85181
65	5	Prevalence	6	People's Republic of China	3	Both	27	Age-standardized	681	Caries of deciduous teeth	3	Rate	1990	2021	-5.44283	-0.656154	-9.61224
66	5	Prevalence	10	Kingdom of Cambodia	3	Both	27	Age-standardized	681	Caries of deciduous teeth	3	Rate	1990	2021	-2.72009	7.16212	-9.43721
67	5	Prevalence	164	Nepal	3	Both	27	Age-standardized	681	Caries of deciduous teeth	3	Rate	1990	2021	-16.9314	6.72108	-35.2421
68	5	Prevalence	179	Ethiopia	3	Both	27	Age-standardized	681	Caries of deciduous teeth	3	Rate	1990	2021	-0.999956	1.96811	-3.91525
69	5	Prevalence	142	Islamic Republic of Iran	3	Both	27	Age-standardized	681	Caries of deciduous teeth	3	Rate	1990	2021	-0.683027	3.07652	-3.90988
70	5	Prevalence	8	Taiwan (Province of China)	3	Both	27	Age-standardized	681	Caries of deciduous teeth	3	Rate	1990	2021	24.4383	66.2365	5.26276
71	5	Prevalence	21	Oceania	3	Both	27	Age-standardized	681	Caries of deciduous teeth	3	Rate	1990	2021	-1.60693	2.94417	-5.89081
72	5	Prevalence	198	Zimbabwe	3	Both	27	Age-standardized	681	Caries of deciduous teeth	3	Rate	1990	2021	25.2158	47.9845	7.34473
73	5	Prevalence	162	Bhutan	3	Both	27	Age-standardized	681	Caries of deciduous teeth	3	Rate	1990	2021	-28.4251	0.696008	-50.1583
74	5	Prevalence	175	Burundi	3	Both	27	Age-standardized	681	Caries of deciduous teeth	3	Rate	1990	2021	-21.9597	11.7447	-45.269
75	5	Prevalence	191	Zambia	3	Both	27	Age-standardized	681	Caries of deciduous teeth	3	Rate	1990	2021	-0.52117	6.32267	-6.742
76	5	Prevalence	19	Democratic Republic of Timor-Leste	3	Both	27	Age-standardized	681	Caries of deciduous teeth	3	Rate	1990	2021	15.3758	36.7514	2.31587
77	5	Prevalence	200	Benin	3	Both	27	Age-standardized	681	Caries of deciduous teeth	3	Rate	1990	2021	-3.29336	2.95443	-8.51933
78	5	Prevalence	32	Central Asia	3	Both	27	Age-standardized	681	Caries of deciduous teeth	3	Rate	1990	2021	0.0527958	2.14009	-1.93072
79	5	Prevalence	41	Republic of Uzbekistan	3	Both	27	Age-standardized	681	Caries of deciduous teeth	3	Rate	1990	2021	-0.370306	4.69482	-5.14057
80	5	Prevalence	213	Niger	3	Both	27	Age-standardized	681	Caries of deciduous teeth	3	Rate	1990	2021	-12.2952	-0.896121	-23.7828
81	5	Prevalence	28	Solomon Islands	3	Both	27	Age-standardized	681	Caries of deciduous teeth	3	Rate	1990	2021	-1.34005	6.83489	-8.34874
82	5	Prevalence	30	Republic of Vanuatu	3	Both	27	Age-standardized	681	Caries of deciduous teeth	3	Rate	1990	2021	-0.644265	6.25504	-6.07697
83	5	Prevalence	63	Ukraine	3	Both	27	Age-standardized	681	Caries of deciduous teeth	3	Rate	1990	2021	-0.612464	5.82518	-5.51877
84	5	Prevalence	173	Gabon	3	Both	27	Age-standardized	681	Caries of deciduous teeth	3	Rate	1990	2021	-24.6455	14.4323	-49.9484
85	5	Prevalence	209	Guinea-Bissau	3	Both	27	Age-standardized	681	Caries of deciduous teeth	3	Rate	1990	2021	-1.87086	4.42334	-7.74096
86	5	Prevalence	105	Antigua and Barbuda	3	Both	27	Age-standardized	681	Caries of deciduous teeth	3	Rate	1990	2021	-1.52229	3.79467	-6.95697
87	5	Prevalence	4	Southeast Asia, East Asia, and Oceania	3	Both	27	Age-standardized	681	Caries of deciduous teeth	3	Rate	1990	2021	-3.98449	-1.05818	-6.57599
88	5	Prevalence	39	Republic of Tajikistan	3	Both	27	Age-standardized	681	Caries of deciduous teeth	3	Rate	1990	2021	0.19203	5.73187	-4.52037
89	5	Prevalence	52	Romania	3	Both	27	Age-standardized	681	Caries of deciduous teeth	3	Rate	1990	2021	-21.1035	-11.6718	-29.8798
90	5	Prevalence	177	Djibouti	3	Both	27	Age-standardized	681	Caries of deciduous teeth	3	Rate	1990	2021	-23.4885	11.0614	-47.6078
91	5	Prevalence	74	Principality of Andorra	3	Both	27	Age-standardized	681	Caries of deciduous teeth	3	Rate	1990	2021	-0.298964	8.84131	-8.27051
92	5	Prevalence	61	Republic of Moldova	3	Both	27	Age-standardized	681	Caries of deciduous teeth	3	Rate	1990	2021	0.394383	7.43642	-5.47901
93	5	Prevalence	96	Southern Latin America	3	Both	27	Age-standardized	681	Caries of deciduous teeth	3	Rate	1990	2021	-10.5287	-0.379746	-19.0152
94	5	Prevalence	85	State of Israel	3	Both	27	Age-standardized	681	Caries of deciduous teeth	3	Rate	1990	2021	10.4179	25.8063	-3.12663
95	5	Prevalence	72	New Zealand	3	Both	27	Age-standardized	681	Caries of deciduous teeth	3	Rate	1990	2021	-31.5199	-16.1449	-49.055
96	5	Prevalence	83	Republic of Iceland	3	Both	27	Age-standardized	681	Caries of deciduous teeth	3	Rate	1990	2021	-1.66366	7.95837	-8.95397
97	5	Prevalence	171	Democratic Republic of the Congo	3	Both	27	Age-standardized	681	Caries of deciduous teeth	3	Rate	1990	2021	-22.8873	13.3421	-48.3497
98	5	Prevalence	207	Ghana	3	Both	27	Age-standardized	681	Caries of deciduous teeth	3	Rate	1990	2021	-3.31973	4.08226	-9.61431
99	5	Prevalence	107	Barbados	3	Both	27	Age-standardized	681	Caries of deciduous teeth	3	Rate	1990	2021	-0.925883	5.67577	-5.98803
100	5	Prevalence	189	United Republic of Tanzania	3	Both	27	Age-standardized	681	Caries of deciduous teeth	3	Rate	1990	2021	-9.0338	31.9355	-36.695
101	5	Prevalence	240	Europe & Central Asia - WB	3	Both	27	Age-standardized	681	Caries of deciduous teeth	3	Rate	1990	2021	-10.0687	-6.84077	-12.8043
102	5	Prevalence	202	Cameroon	3	Both	27	Age-standardized	681	Caries of deciduous teeth	3	Rate	1990	2021	-2.31361	3.42024	-8.24147
103	5	Prevalence	94	Swiss Confederation	3	Both	27	Age-standardized	681	Caries of deciduous teeth	3	Rate	1990	2021	-26.8748	-11.7541	-39.4631
104	5	Prevalence	211	Mali	3	Both	27	Age-standardized	681	Caries of deciduous teeth	3	Rate	1990	2021	-4.12123	2.29086	-9.96324
105	5	Prevalence	103	Latin America and Caribbean	3	Both	27	Age-standardized	681	Caries of deciduous teeth	3	Rate	1990	2021	1.16483	9.996	-5.30862
106	5	Prevalence	184	Mozambique	3	Both	27	Age-standardized	681	Caries of deciduous teeth	3	Rate	1990	2021	-24.6378	11.0301	-48.4435
107	5	Prevalence	160	Afghanistan	3	Both	27	Age-standardized	681	Caries of deciduous teeth	3	Rate	1990	2021	-7.08911	30.836	-32.7774
108	5	Prevalence	50	Montenegro	3	Both	27	Age-standardized	681	Caries of deciduous teeth	3	Rate	1990	2021	-13.3587	-4.09417	-26.165
109	5	Prevalence	186	Seychelles	3	Both	27	Age-standardized	681	Caries of deciduous teeth	3	Rate	1990	2021	-2.12455	3.29302	-8.24128
110	5	Prevalence	15	Republic of the Union of Myanmar	3	Both	27	Age-standardized	681	Caries of deciduous teeth	3	Rate	1990	2021	-4.27249	1.32995	-10.0186
111	5	Prevalence	17	Democratic Socialist Republic of Sri Lanka	3	Both	27	Age-standardized	681	Caries of deciduous teeth	3	Rate	1990	2021	8.22288	23.9568	-4.44434
112	5	Prevalence	26	Independent State of Papua New Guinea	3	Both	27	Age-standardized	681	Caries of deciduous teeth	3	Rate	1990	2021	-1.82149	4.08985	-7.52569
113	5	Prevalence	242	Sub-Saharan Africa - WB	3	Both	27	Age-standardized	681	Caries of deciduous teeth	3	Rate	1990	2021	-5.74883	8.23067	-15.6687
114	5	Prevalence	169	Central African Republic	3	Both	27	Age-standardized	681	Caries of deciduous teeth	3	Rate	1990	2021	-23.403	11.1393	-48.594
115	5	Prevalence	149	Palestine	3	Both	27	Age-standardized	681	Caries of deciduous teeth	3	Rate	1990	2021	-5.02935	29.8711	-32.4775
116	5	Prevalence	138	North Africa and Middle East	3	Both	27	Age-standardized	681	Caries of deciduous teeth	3	Rate	1990	2021	-5.99323	20.8007	-23.9119
117	5	Prevalence	54	Slovak Republic	3	Both	27	Age-standardized	681	Caries of deciduous teeth	3	Rate	1990	2021	-1.28497	2.82697	-6.28719
118	5	Prevalence	147	Libya	3	Both	27	Age-standardized	681	Caries of deciduous teeth	3	Rate	1990	2021	-5.65109	36.5412	-34.0223
119	5	Prevalence	140	Kingdom of Bahrain	3	Both	27	Age-standardized	681	Caries of deciduous teeth	3	Rate	1990	2021	-0.375899	6.59921	-6.52959
120	5	Prevalence	158	South Asia	3	Both	27	Age-standardized	681	Caries of deciduous teeth	3	Rate	1990	2021	-7.52711	6.68842	-17.5265
121	5	Prevalence	65	High-income Asia Pacific	3	Both	27	Age-standardized	681	Caries of deciduous teeth	3	Rate	1990	2021	-23.0406	-14.1082	-29.9349
122	5	Prevalence	79	Republic of Finland	3	Both	27	Age-standardized	681	Caries of deciduous teeth	3	Rate	1990	2021	43.8602	77.8204	6.36827
123	5	Prevalence	81	Federal Republic of Germany	3	Both	27	Age-standardized	681	Caries of deciduous teeth	3	Rate	1990	2021	-42.8278	-31.8013	-53.5405
124	5	Prevalence	136	Republic of Paraguay	3	Both	27	Age-standardized	681	Caries of deciduous teeth	3	Rate	1990	2021	5.9033	23.5279	-6.75438
125	5	Prevalence	92	Kingdom of Spain	3	Both	27	Age-standardized	681	Caries of deciduous teeth	3	Rate	1990	2021	-4.19143	15.7686	-22.8137
126	5	Prevalence	87	Grand Duchy of Luxembourg	3	Both	27	Age-standardized	681	Caries of deciduous teeth	3	Rate	1990	2021	-2.21432	5.79363	-9.84737
127	5	Prevalence	46	Republic of Croatia	3	Both	27	Age-standardized	681	Caries of deciduous teeth	3	Rate	1990	2021	-13.0208	-2.57184	-25.5057
128	5	Prevalence	123	Republic of Peru	3	Both	27	Age-standardized	681	Caries of deciduous teeth	3	Rate	1990	2021	-3.74821	2.97549	-9.69639
129	5	Prevalence	129	Republic of Honduras	3	Both	27	Age-standardized	681	Caries of deciduous teeth	3	Rate	1990	2021	-1.55901	5.93194	-8.30535
130	5	Prevalence	57	Republic of Belarus	3	Both	27	Age-standardized	681	Caries of deciduous teeth	3	Rate	1990	2021	-1.36858	6.638	-8.75978
131	5	Prevalence	151	Qatar	3	Both	27	Age-standardized	681	Caries of deciduous teeth	3	Rate	1990	2021	9.56525	29.2637	-3.86743
132	5	Prevalence	116	Saint Lucia	3	Both	27	Age-standardized	681	Caries of deciduous teeth	3	Rate	1990	2021	-5.89567	10.4648	-19.575
133	5	Prevalence	70	Australasia	3	Both	27	Age-standardized	681	Caries of deciduous teeth	3	Rate	1990	2021	93.7758	113.575	68.2643
134	5	Prevalence	59	Republic of Latvia	3	Both	27	Age-standardized	681	Caries of deciduous teeth	3	Rate	1990	2021	1.03627	14.2323	-15.9296
135	5	Prevalence	125	Republic of Colombia	3	Both	27	Age-standardized	681	Caries of deciduous teeth	3	Rate	1990	2021	-13.1578	14.3369	-29.8601
136	5	Prevalence	76	Kingdom of Belgium	3	Both	27	Age-standardized	681	Caries of deciduous teeth	3	Rate	1990	2021	11.1591	44.1569	-15.5552
137	5	Prevalence	24	Republic of the Marshall Islands	3	Both	27	Age-standardized	681	Caries of deciduous teeth	3	Rate	1990	2021	-0.425325	6.49646	-6.06353
138	5	Prevalence	90	Kingdom of Norway	3	Both	27	Age-standardized	681	Caries of deciduous teeth	3	Rate	1990	2021	9.3934	18.2132	4.18148
139	5	Prevalence	114	Republic of Haiti	3	Both	27	Age-standardized	681	Caries of deciduous teeth	3	Rate	1990	2021	-10.6005	22.3609	-35.281
140	5	Prevalence	167	Central Sub-Saharan Africa	3	Both	27	Age-standardized	681	Caries of deciduous teeth	3	Rate	1990	2021	-22.9547	11.6604	-47.1531
141	5	Prevalence	248	Eastern Africa	3	Both	27	Age-standardized	681	Caries of deciduous teeth	3	Rate	1990	2021	-10.0623	3.24899	-20.4264
142	5	Prevalence	351	Guam	3	Both	27	Age-standardized	681	Caries of deciduous teeth	3	Rate	1990	2021	-0.522036	7.18421	-6.36982
143	5	Prevalence	196	South Africa	3	Both	27	Age-standardized	681	Caries of deciduous teeth	3	Rate	1990	2021	7.86015	13.7501	1.9301
144	5	Prevalence	110	Commonwealth of Dominica	3	Both	27	Age-standardized	681	Caries of deciduous teeth	3	Rate	1990	2021	-1.18091	5.73098	-6.77054
145	5	Prevalence	13	Malaysia	3	Both	27	Age-standardized	681	Caries of deciduous teeth	3	Rate	1990	2021	-6.52822	5.30534	-22.5032
146	5	Prevalence	127	Republic of El Salvador	3	Both	27	Age-standardized	681	Caries of deciduous teeth	3	Rate	1990	2021	-1.07263	6.28974	-9.08434
147	5	Prevalence	37	Kyrgyz Republic	3	Both	27	Age-standardized	681	Caries of deciduous teeth	3	Rate	1990	2021	0.114794	5.37307	-4.22201
148	5	Prevalence	156	United Arab Emirates	3	Both	27	Age-standardized	681	Caries of deciduous teeth	3	Rate	1990	2021	4.03723	36.5596	-19.1983
149	5	Prevalence	413	Tokelau	3	Both	27	Age-standardized	681	Caries of deciduous teeth	3	Rate	1990	2021	-7.41602	8.92051	-19.9001
150	5	Prevalence	145	State of Kuwait	3	Both	27	Age-standardized	681	Caries of deciduous teeth	3	Rate	1990	2021	15.0782	37.6173	-8.95003
151	5	Prevalence	99	Eastern Republic of Uruguay	3	Both	27	Age-standardized	681	Caries of deciduous teeth	3	Rate	1990	2021	-2.05614	5.15689	-8.81405
152	5	Prevalence	48	Hungary	3	Both	27	Age-standardized	681	Caries of deciduous teeth	3	Rate	1990	2021	-13.2097	-3.10456	-26.7441
153	5	Prevalence	35	Georgia	3	Both	27	Age-standardized	681	Caries of deciduous teeth	3	Rate	1990	2021	10.6951	28.7717	-0.406265
154	5	Prevalence	393	Saint Kitts and Nevis	3	Both	27	Age-standardized	681	Caries of deciduous teeth	3	Rate	1990	2021	-2.16414	3.32388	-8.1057
155	5	Prevalence	218	Togo	3	Both	27	Age-standardized	681	Caries of deciduous teeth	3	Rate	1990	2021	-23.8455	9.57348	-48.2319
156	5	Prevalence	120	Andean Latin America	3	Both	27	Age-standardized	681	Caries of deciduous teeth	3	Rate	1990	2021	-7.17188	-1.79462	-12.7105
157	5	Prevalence	112	Grenada	3	Both	27	Age-standardized	681	Caries of deciduous teeth	3	Rate	1990	2021	-2.59723	3.59628	-8.24004
158	5	Prevalence	134	Tropical Latin America	3	Both	27	Age-standardized	681	Caries of deciduous teeth	3	Rate	1990	2021	7.0254	13.0805	1.92662
159	5	Prevalence	320	Cook Islands	3	Both	27	Age-standardized	681	Caries of deciduous teeth	3	Rate	1990	2021	-1.25826	4.75842	-6.73158
160	5	Prevalence	165	Pakistan	3	Both	27	Age-standardized	681	Caries of deciduous teeth	3	Rate	1990	2021	-16.7354	4.28617	-31.8829
161	5	Prevalence	11	Republic of Indonesia	3	Both	27	Age-standardized	681	Caries of deciduous teeth	3	Rate	1990	2021	1.28813	4.09339	-1.75705
162	5	Prevalence	194	Lesotho	3	Both	27	Age-standardized	681	Caries of deciduous teeth	3	Rate	1990	2021	-19.5898	22.105	-47.6358
163	5	Prevalence	261	Southern Africa	3	Both	27	Age-standardized	681	Caries of deciduous teeth	3	Rate	1990	2021	-6.2125	10.2686	-18.5104
164	5	Prevalence	118	Republic of Suriname	3	Both	27	Age-standardized	681	Caries of deciduous teeth	3	Rate	1990	2021	-1.49767	4.07173	-6.36351
165	5	Prevalence	374	Niue	3	Both	27	Age-standardized	681	Caries of deciduous teeth	3	Rate	1990	2021	-1.57892	4.71856	-7.02015
166	5	Prevalence	180	Kenya	3	Both	27	Age-standardized	681	Caries of deciduous teeth	3	Rate	1990	2021	-4.49518	1.3779	-9.33661
167	5	Prevalence	182	Malawi	3	Both	27	Age-standardized	681	Caries of deciduous teeth	3	Rate	1990	2021	-0.603503	6.70218	-6.47609
168	5	Prevalence	101	Canada	3	Both	27	Age-standardized	681	Caries of deciduous teeth	3	Rate	1990	2021	14.2249	32.2368	-0.322033
169	5	Prevalence	205	C么te d'Ivoire	3	Both	27	Age-standardized	681	Caries of deciduous teeth	3	Rate	1990	2021	-2.72671	3.97857	-9.00619
170	5	Prevalence	44	Bosnia and Herzegovina	3	Both	27	Age-standardized	681	Caries of deciduous teeth	3	Rate	1990	2021	-11.5597	-2.497	-21.5133
171	5	Prevalence	154	Tunisia	3	Both	27	Age-standardized	681	Caries of deciduous teeth	3	Rate	1990	2021	-1.08613	4.75898	-5.97873
172	5	Prevalence	68	Republic of Korea	3	Both	27	Age-standardized	681	Caries of deciduous teeth	3	Rate	1990	2021	-21.2554	-7.24826	-28.172
173	5	Prevalence	216	Senegal	3	Both	27	Age-standardized	681	Caries of deciduous teeth	3	Rate	1990	2021	-2.1843	5.28231	-9.41469
174	5	Prevalence	22	Republic of Fiji	3	Both	27	Age-standardized	681	Caries of deciduous teeth	3	Rate	1990	2021	-1.90636	4.08016	-9.06854
175	5	Prevalence	176	Comoros	3	Both	27	Age-standardized	681	Caries of deciduous teeth	3	Rate	1990	2021	0.190297	6.65015	-5.6122
176	5	Prevalence	163	India	3	Both	27	Age-standardized	681	Caries of deciduous teeth	3	Rate	1990	2021	-5.98242	8.07517	-15.934
177	5	Prevalence	199	Western Sub-Saharan Africa	3	Both	27	Age-standardized	681	Caries of deciduous teeth	3	Rate	1990	2021	4.03521	13.2128	-3.17442
178	5	Prevalence	201	Burkina Faso	3	Both	27	Age-standardized	681	Caries of deciduous teeth	3	Rate	1990	2021	-24.2763	9.8439	-47.6679
179	5	Prevalence	42	Central Europe	3	Both	27	Age-standardized	681	Caries of deciduous teeth	3	Rate	1990	2021	-10.5936	-6.34355	-15.1237
180	5	Prevalence	172	Equatorial Guinea	3	Both	27	Age-standardized	681	Caries of deciduous teeth	3	Rate	1990	2021	-27.5468	7.95362	-51.943
181	5	Prevalence	64	High-income	3	Both	27	Age-standardized	681	Caries of deciduous teeth	3	Rate	1990	2021	-6.3103	-1.99826	-10.6592
182	5	Prevalence	53	Republic of Serbia	3	Both	27	Age-standardized	681	Caries of deciduous teeth	3	Rate	1990	2021	-23.1397	-11.2066	-34.8555
183	5	Prevalence	380	Palau	3	Both	27	Age-standardized	681	Caries of deciduous teeth	3	Rate	1990	2021	-0.468933	7.76951	-6.52342
184	5	Prevalence	132	Republic of Panama	3	Both	27	Age-standardized	681	Caries of deciduous teeth	3	Rate	1990	2021	-14.633	26.4851	-41.2598
185	5	Prevalence	33	Republic of Armenia	3	Both	27	Age-standardized	681	Caries of deciduous teeth	3	Rate	1990	2021	-0.969595	3.84505	-6.33033
186	5	Prevalence	192	Southern Sub-Saharan Africa	3	Both	27	Age-standardized	681	Caries of deciduous teeth	3	Rate	1990	2021	8.09353	13.7013	3.16991
187	5	Prevalence	106	Commonwealth of the Bahamas	3	Both	27	Age-standardized	681	Caries of deciduous teeth	3	Rate	1990	2021	1.38514	12.5876	-8.60739
188	5	Prevalence	210	Liberia	3	Both	27	Age-standardized	681	Caries of deciduous teeth	3	Rate	1990	2021	-1.38043	4.69288	-7.31569
189	5	Prevalence	214	Nigeria	3	Both	27	Age-standardized	681	Caries of deciduous teeth	3	Rate	1990	2021	23.5822	46.0648	6.17084
190	5	Prevalence	143	Republic of Iraq	3	Both	27	Age-standardized	681	Caries of deciduous teeth	3	Rate	1990	2021	-7.79396	34.0294	-34.8088
191	5	Prevalence	75	Republic of Austria	3	Both	27	Age-standardized	681	Caries of deciduous teeth	3	Rate	1990	2021	-0.748036	6.84854	-7.01573
192	5	Prevalence	485	KwaZulu-Natal	3	Both	27	Age-standardized	681	Caries of deciduous teeth	3	Rate	1990	2021	8.80173	17.7042	0.900084
193	5	Prevalence	298	American Samoa	3	Both	27	Age-standardized	681	Caries of deciduous teeth	3	Rate	1990	2021	-11.4367	18.4284	-34.3804
194	5	Prevalence	435	South Sudan	3	Both	27	Age-standardized	681	Caries of deciduous teeth	3	Rate	1990	2021	0.844293	9.73236	-5.20818
195	5	Prevalence	433	Northern Ireland	3	Both	27	Age-standardized	681	Caries of deciduous teeth	3	Rate	1990	2021	12.2784	30.8555	-7.24329
196	5	Prevalence	367	Monaco	3	Both	27	Age-standardized	681	Caries of deciduous teeth	3	Rate	1990	2021	-1.13796	7.30766	-10.2376
197	5	Prevalence	190	Uganda	3	Both	27	Age-standardized	681	Caries of deciduous teeth	3	Rate	1990	2021	-1.8263	5.73629	-8.1903
198	5	Prevalence	97	Argentine Republic	3	Both	27	Age-standardized	681	Caries of deciduous teeth	3	Rate	1990	2021	-13.686	-0.0808549	-25.251
199	5	Prevalence	174	Eastern Sub-Saharan Africa	3	Both	27	Age-standardized	681	Caries of deciduous teeth	3	Rate	1990	2021	-12.1027	-0.0738872	-21.4513
200	5	Prevalence	108	Belize	3	Both	27	Age-standardized	681	Caries of deciduous teeth	3	Rate	1990	2021	-1.42337	4.12213	-7.66709
201	5	Prevalence	241	Latin America & Caribbean - WB	3	Both	27	Age-standardized	681	Caries of deciduous teeth	3	Rate	1990	2021	0.00196439	7.42376	-5.37412
202	5	Prevalence	178	Eritrea	3	Both	27	Age-standardized	681	Caries of deciduous teeth	3	Rate	1990	2021	-23.637	11.5807	-47.5502
203	5	Prevalence	203	Cabo Verde	3	Both	27	Age-standardized	681	Caries of deciduous teeth	3	Rate	1990	2021	-4.08961	2.53985	-11.1308
204	5	Prevalence	208	Guinea	3	Both	27	Age-standardized	681	Caries of deciduous teeth	3	Rate	1990	2021	-2.60154	3.74886	-8.11071
205	5	Prevalence	483	Free State	3	Both	27	Age-standardized	681	Caries of deciduous teeth	3	Rate	1990	2021	7.22049	16.7283	-0.931053
206	5	Prevalence	86	Republic of Italy	3	Both	27	Age-standardized	681	Caries of deciduous teeth	3	Rate	1990	2021	-9.13087	12.6384	-26.1402
207	5	Prevalence	187	Somalia	3	Both	27	Age-standardized	681	Caries of deciduous teeth	3	Rate	1990	2021	-22.6164	14.0972	-45.6988
208	5	Prevalence	243	Middle East & North Africa - WB	3	Both	27	Age-standardized	681	Caries of deciduous teeth	3	Rate	1990	2021	-6.98128	19.2788	-24.4209
209	5	Prevalence	185	Rwanda	3	Both	27	Age-standardized	681	Caries of deciduous teeth	3	Rate	1990	2021	-24.2125	9.19853	-48.1357
210	5	Prevalence	150	Oman	3	Both	27	Age-standardized	681	Caries of deciduous teeth	3	Rate	1990	2021	-14.0475	-0.773773	-26.8836
211	5	Prevalence	212	Mauritania	3	Both	27	Age-standardized	681	Caries of deciduous teeth	3	Rate	1990	2021	-2.95932	4.00257	-8.81853
212	5	Prevalence	88	Republic of Malta	3	Both	27	Age-standardized	681	Caries of deciduous teeth	3	Rate	1990	2021	-2.36372	5.59376	-10.2195
213	5	Prevalence	161	Bangladesh	3	Both	27	Age-standardized	681	Caries of deciduous teeth	3	Rate	1990	2021	-3.534	2.96102	-9.68434
214	5	Prevalence	527	California	3	Both	27	Age-standardized	681	Caries of deciduous teeth	3	Rate	1990	2021	18.782	33.8034	8.06546
215	5	Prevalence	117	Saint Vincent and the Grenadines	3	Both	27	Age-standardized	681	Caries of deciduous teeth	3	Rate	1990	2021	-38.23	-18.9124	-52.9738
216	5	Prevalence	139	People's Democratic Republic of Algeria	3	Both	27	Age-standardized	681	Caries of deciduous teeth	3	Rate	1990	2021	-7.82857	31.3555	-34.8935
217	5	Prevalence	152	Saudi Arabia	3	Both	27	Age-standardized	681	Caries of deciduous teeth	3	Rate	1990	2021	-4.87337	4.86872	-13.9389
218	5	Prevalence	130	United Mexican States	3	Both	27	Age-standardized	681	Caries of deciduous teeth	3	Rate	1990	2021	9.25291	21.8009	0.287433
219	5	Prevalence	66	Brunei Darussalam	3	Both	27	Age-standardized	681	Caries of deciduous teeth	3	Rate	1990	2021	-0.562456	5.03355	-6.00491
220	5	Prevalence	77	Republic of Cyprus	3	Both	27	Age-standardized	681	Caries of deciduous teeth	3	Rate	1990	2021	-0.668868	9.008	-8.39443
221	5	Prevalence	547	Mississippi	3	Both	27	Age-standardized	681	Caries of deciduous teeth	3	Rate	1990	2021	2.80044	11.3817	-3.87367
222	5	Prevalence	55	Republic of Slovenia	3	Both	27	Age-standardized	681	Caries of deciduous teeth	3	Rate	1990	2021	-6.81475	2.71496	-16.9526
223	5	Prevalence	488	North-West	3	Both	27	Age-standardized	681	Caries of deciduous teeth	3	Rate	1990	2021	8.29768	16.6723	-0.658071
224	5	Prevalence	170	Congo	3	Both	27	Age-standardized	681	Caries of deciduous teeth	3	Rate	1990	2021	-0.644852	4.69191	-5.60421
225	5	Prevalence	479	WHO region	3	Both	27	Age-standardized	681	Caries of deciduous teeth	3	Rate	1990	2021	-6.92761	2.24937	-13.9653
226	5	Prevalence	549	Montana	3	Both	27	Age-standardized	681	Caries of deciduous teeth	3	Rate	1990	2021	16.8161	28.5558	7.68982
227	5	Prevalence	141	Arab Republic of Egypt	3	Both	27	Age-standardized	681	Caries of deciduous teeth	3	Rate	1990	2021	-8.47272	33.8807	-35.0104
228	5	Prevalence	416	Tuvalu	3	Both	27	Age-standardized	681	Caries of deciduous teeth	3	Rate	1990	2021	-1.65293	4.98426	-7.57141
229	5	Prevalence	396	San Marino	3	Both	27	Age-standardized	681	Caries of deciduous teeth	3	Rate	1990	2021	-0.642998	8.2524	-8.75918
230	5	Prevalence	538	Iowa	3	Both	27	Age-standardized	681	Caries of deciduous teeth	3	Rate	1990	2021	54.0466	156.508	-4.7462
231	5	Prevalence	560	Oregon	3	Both	27	Age-standardized	681	Caries of deciduous teeth	3	Rate	1990	2021	17.2615	30.9193	8.39602
232	5	Prevalence	536	Illinois	3	Both	27	Age-standardized	681	Caries of deciduous teeth	3	Rate	1990	2021	21.0952	83.8854	-22.183
233	5	Prevalence	525	Arizona	3	Both	27	Age-standardized	681	Caries of deciduous teeth	3	Rate	1990	2021	81.684	131.102	36.3061
234	5	Prevalence	490	Western Cape	3	Both	27	Age-standardized	681	Caries of deciduous teeth	3	Rate	1990	2021	9.11109	17.8916	1.25896
235	5	Prevalence	195	Namibia	3	Both	27	Age-standardized	681	Caries of deciduous teeth	3	Rate	1990	2021	-20.734	23.975	-48.8354
236	5	Prevalence	121	Plurinational State of Bolivia	3	Both	27	Age-standardized	681	Caries of deciduous teeth	3	Rate	1990	2021	-3.53262	1.34066	-9.11985
237	5	Prevalence	197	Eswatini	3	Both	27	Age-standardized	681	Caries of deciduous teeth	3	Rate	1990	2021	-0.344369	6.32523	-6.47584
238	5	Prevalence	558	Ohio	3	Both	27	Age-standardized	681	Caries of deciduous teeth	3	Rate	1990	2021	17.7146	29.5423	9.06576
239	5	Prevalence	263	Western Africa	3	Both	27	Age-standardized	681	Caries of deciduous teeth	3	Rate	1990	2021	4.81485	15.3792	-3.76561
240	5	Prevalence	128	Republic of Guatemala	3	Both	27	Age-standardized	681	Caries of deciduous teeth	3	Rate	1990	2021	-1.48069	6.48996	-7.51292
241	5	Prevalence	254	Northern Africa	3	Both	27	Age-standardized	681	Caries of deciduous teeth	3	Rate	1990	2021	-7.86972	29.8313	-32.1483
242	5	Prevalence	571	West Virginia	3	Both	27	Age-standardized	681	Caries of deciduous teeth	3	Rate	1990	2021	18.4514	29.871	9.45122
243	5	Prevalence	569	Virginia	3	Both	27	Age-standardized	681	Caries of deciduous teeth	3	Rate	1990	2021	18.1156	31.6694	8.63505
244	5	Prevalence	4624	Greater London	3	Both	27	Age-standardized	681	Caries of deciduous teeth	3	Rate	1990	2021	-25.1182	-9.3399	-38.3326
245	5	Prevalence	523	Alabama	3	Both	27	Age-standardized	681	Caries of deciduous teeth	3	Rate	1990	2021	17.2311	28.2064	8.38323
246	5	Prevalence	4626	South West England	3	Both	27	Age-standardized	681	Caries of deciduous teeth	3	Rate	1990	2021	-34.2527	-18.2596	-47.82
247	5	Prevalence	239	East Asia & Pacific - WB	3	Both	27	Age-standardized	681	Caries of deciduous teeth	3	Rate	1990	2021	-4.53136	-1.67977	-7.0979
248	5	Prevalence	217	Sierra Leone	3	Both	27	Age-standardized	681	Caries of deciduous teeth	3	Rate	1990	2021	-28.8278	-14.4428	-42.0726
249	5	Prevalence	181	Madagascar	3	Both	27	Age-standardized	681	Caries of deciduous teeth	3	Rate	1990	2021	-50.3623	-35.6786	-62.5732
250	5	Prevalence	545	Michigan	3	Both	27	Age-standardized	681	Caries of deciduous teeth	3	Rate	1990	2021	18.0225	28.604	9.7245
251	5	Prevalence	349	Greenland	3	Both	27	Age-standardized	681	Caries of deciduous teeth	3	Rate	1990	2021	-0.627041	5.99469	-6.3037
252	5	Prevalence	183	Mauritius	3	Both	27	Age-standardized	681	Caries of deciduous teeth	3	Rate	1990	2021	-16.4209	16.0251	-39.6004
253	5	Prevalence	4650	Chihuahua	3	Both	27	Age-standardized	681	Caries of deciduous teeth	3	Rate	1990	2021	-2.16901	38.3593	-31.429
254	5	Prevalence	206	Gambia	3	Both	27	Age-standardized	681	Caries of deciduous teeth	3	Rate	1990	2021	-0.260289	6.69062	-5.94567
255	5	Prevalence	119	Republic of Trinidad and Tobago	3	Both	27	Age-standardized	681	Caries of deciduous teeth	3	Rate	1990	2021	-10.8054	29.7165	-37.325
256	5	Prevalence	4661	Nuevo Le贸n	3	Both	27	Age-standardized	681	Caries of deciduous teeth	3	Rate	1990	2021	13.3475	22.9705	4.24441
257	5	Prevalence	532	Florida	3	Both	27	Age-standardized	681	Caries of deciduous teeth	3	Rate	1990	2021	20.7313	81.7197	-20.3618
258	5	Prevalence	556	North Carolina	3	Both	27	Age-standardized	681	Caries of deciduous teeth	3	Rate	1990	2021	17.5804	29.0541	7.87149
259	5	Prevalence	376	Northern Mariana Islands	3	Both	27	Age-standardized	681	Caries of deciduous teeth	3	Rate	1990	2021	-0.130925	6.45057	-6.57187
260	5	Prevalence	567	Utah	3	Both	27	Age-standardized	681	Caries of deciduous teeth	3	Rate	1990	2021	16.7423	26.3808	7.34092
261	5	Prevalence	4659	Morelos	3	Both	27	Age-standardized	681	Caries of deciduous teeth	3	Rate	1990	2021	13.4732	22.6544	3.98545
262	5	Prevalence	193	Botswana	3	Both	27	Age-standardized	681	Caries of deciduous teeth	3	Rate	1990	2021	-1.90646	3.14816	-7.12989
263	5	Prevalence	554	New Mexico	3	Both	27	Age-standardized	681	Caries of deciduous teeth	3	Rate	1990	2021	23.4466	48.1446	9.15955
264	5	Prevalence	478	World Bank Regions	3	Both	27	Age-standardized	681	Caries of deciduous teeth	3	Rate	1990	2021	-6.86844	2.33437	-13.9192
265	5	Prevalence	534	Hawaii	3	Both	27	Age-standardized	681	Caries of deciduous teeth	3	Rate	1990	2021	10.6151	60.0124	-23.0963
266	5	Prevalence	4648	Colima	3	Both	27	Age-standardized	681	Caries of deciduous teeth	3	Rate	1990	2021	5.98	33.0466	-11.2444
267	5	Prevalence	543	Maryland	3	Both	27	Age-standardized	681	Caries of deciduous teeth	3	Rate	1990	2021	16.7609	28.321	7.17321
268	5	Prevalence	4670	Tamaulipas	3	Both	27	Age-standardized	681	Caries of deciduous teeth	3	Rate	1990	2021	11.9824	23.9509	2.59171
269	5	Prevalence	369	Nauru	3	Both	27	Age-standardized	681	Caries of deciduous teeth	3	Rate	1990	2021	0.110976	5.82061	-5.3553
270	5	Prevalence	486	Limpopo	3	Both	27	Age-standardized	681	Caries of deciduous teeth	3	Rate	1990	2021	6.85884	15.3534	-0.752959
271	5	Prevalence	563	South Carolina	3	Both	27	Age-standardized	681	Caries of deciduous teeth	3	Rate	1990	2021	16.7454	28.7089	7.30488
272	5	Prevalence	541	Louisiana	3	Both	27	Age-standardized	681	Caries of deciduous teeth	3	Rate	1990	2021	23.0992	51.8457	8.28845
273	5	Prevalence	385	Puerto Rico	3	Both	27	Age-standardized	681	Caries of deciduous teeth	3	Rate	1990	2021	-11.2777	22.2832	-35.213
274	5	Prevalence	4726	Bali	3	Both	27	Age-standardized	681	Caries of deciduous teeth	3	Rate	1990	2021	0.980978	7.39583	-5.6911
275	5	Prevalence	4622	West Midlands	3	Both	27	Age-standardized	681	Caries of deciduous teeth	3	Rate	1990	2021	-19.4817	21.1866	-45.9734
276	5	Prevalence	552	New Hampshire	3	Both	27	Age-standardized	681	Caries of deciduous teeth	3	Rate	1990	2021	19.4216	33.4204	6.18641
277	5	Prevalence	204	Chad	3	Both	27	Age-standardized	681	Caries of deciduous teeth	3	Rate	1990	2021	-2.44087	3.84052	-8.03352
278	5	Prevalence	305	Bermuda	3	Both	27	Age-standardized	681	Caries of deciduous teeth	3	Rate	1990	2021	-1.57853	4.2049	-6.93092
279	5	Prevalence	434	Scotland	3	Both	27	Age-standardized	681	Caries of deciduous teeth	3	Rate	1990	2021	-42.3966	-32.3245	-51.7456
280	5	Prevalence	4620	Yorkshire and the Humber	3	Both	27	Age-standardized	681	Caries of deciduous teeth	3	Rate	1990	2021	-24.2884	-7.00484	-38.0527
281	5	Prevalence	565	Tennessee	3	Both	27	Age-standardized	681	Caries of deciduous teeth	3	Rate	1990	2021	33.8389	63.3208	15.187
282	5	Prevalence	4655	Hidalgo	3	Both	27	Age-standardized	681	Caries of deciduous teeth	3	Rate	1990	2021	13.0373	21.7211	3.4858
283	5	Prevalence	4715	Bengkulu	3	Both	27	Age-standardized	681	Caries of deciduous teeth	3	Rate	1990	2021	0.523343	5.25108	-4.85674
284	5	Prevalence	528	Colorado	3	Both	27	Age-standardized	681	Caries of deciduous teeth	3	Rate	1990	2021	21.277	85.3685	-22.3387
285	5	Prevalence	215	Sao Tome and Principe	3	Both	27	Age-standardized	681	Caries of deciduous teeth	3	Rate	1990	2021	-14.6328	4.04979	-27.6979
286	5	Prevalence	530	Delaware	3	Both	27	Age-standardized	681	Caries of deciduous teeth	3	Rate	1990	2021	18.5752	32.1038	9.66502
287	5	Prevalence	484	Gauteng	3	Both	27	Age-standardized	681	Caries of deciduous teeth	3	Rate	1990	2021	9.15599	17.0828	2.46731
288	5	Prevalence	4728	East Nusa Tenggara	3	Both	27	Age-standardized	681	Caries of deciduous teeth	3	Rate	1990	2021	1.05475	5.99841	-4.42934
289	5	Prevalence	4618	North East England	3	Both	27	Age-standardized	681	Caries of deciduous teeth	3	Rate	1990	2021	-22.2228	10.4085	-43.0825
290	5	Prevalence	4672	Veracruz de Ignacio de la Llave	3	Both	27	Age-standardized	681	Caries of deciduous teeth	3	Rate	1990	2021	12.5887	23.7126	0.943622
291	5	Prevalence	4644	Baja California	3	Both	27	Age-standardized	681	Caries of deciduous teeth	3	Rate	1990	2021	-1.37718	42.1403	-32.7102
292	5	Prevalence	4668	Sonora	3	Both	27	Age-standardized	681	Caries of deciduous teeth	3	Rate	1990	2021	13.6467	24.2956	4.47146
293	5	Prevalence	4717	Bangka-Belitung Islands	3	Both	27	Age-standardized	681	Caries of deciduous teeth	3	Rate	1990	2021	0.868681	7.01425	-5.52361
294	5	Prevalence	482	Eastern Cape	3	Both	27	Age-standardized	681	Caries of deciduous teeth	3	Rate	1990	2021	7.15997	16.4156	-0.578771
295	5	Prevalence	522	Sudan	3	Both	27	Age-standardized	681	Caries of deciduous teeth	3	Rate	1990	2021	8.22627	64.1715	-26.5876
296	5	Prevalence	539	Kansas	3	Both	27	Age-standardized	681	Caries of deciduous teeth	3	Rate	1990	2021	17.0852	26.937	9.06625
297	5	Prevalence	4657	M茅xico	3	Both	27	Age-standardized	681	Caries of deciduous teeth	3	Rate	1990	2021	13.9322	24.204	3.40446
298	5	Prevalence	4646	Campeche	3	Both	27	Age-standardized	681	Caries of deciduous teeth	3	Rate	1990	2021	21.9035	40.2189	9.46371
299	5	Prevalence	550	Nebraska	3	Both	27	Age-standardized	681	Caries of deciduous teeth	3	Rate	1990	2021	20.8485	85.6632	-21.3596
300	5	Prevalence	548	Missouri	3	Both	27	Age-standardized	681	Caries of deciduous teeth	3	Rate	1990	2021	18.2984	31.8266	9.01201
301	5	Prevalence	4724	East Java	3	Both	27	Age-standardized	681	Caries of deciduous teeth	3	Rate	1990	2021	-0.0787042	6.1782	-6.06304
302	5	Prevalence	4653	Guanajuato	3	Both	27	Age-standardized	681	Caries of deciduous teeth	3	Rate	1990	2021	13.2408	25.3448	4.70161
303	5	Prevalence	561	Pennsylvania	3	Both	27	Age-standardized	681	Caries of deciduous teeth	3	Rate	1990	2021	17.0977	29.9904	8.30603
304	5	Prevalence	489	Northern Cape	3	Both	27	Age-standardized	681	Caries of deciduous teeth	3	Rate	1990	2021	8.12572	16.7232	-1.73407
305	5	Prevalence	422	United States Virgin Islands	3	Both	27	Age-standardized	681	Caries of deciduous teeth	3	Rate	1990	2021	-2.08084	4.33241	-9.75714
306	5	Prevalence	526	Arkansas	3	Both	27	Age-standardized	681	Caries of deciduous teeth	3	Rate	1990	2021	24.0269	48.545	9.26375
307	5	Prevalence	524	Alaska	3	Both	27	Age-standardized	681	Caries of deciduous teeth	3	Rate	1990	2021	38.8921	107.063	-5.81877
308	5	Prevalence	4711	West Sumatra	3	Both	27	Age-standardized	681	Caries of deciduous teeth	3	Rate	1990	2021	-0.0490512	4.77712	-5.61004
309	5	Prevalence	572	Wisconsin	3	Both	27	Age-standardized	681	Caries of deciduous teeth	3	Rate	1990	2021	17.771	29.5473	8.7154
310	5	Prevalence	537	Indiana	3	Both	27	Age-standardized	681	Caries of deciduous teeth	3	Rate	1990	2021	41.9595	136.36	-11.3523
311	5	Prevalence	559	Oklahoma	3	Both	27	Age-standardized	681	Caries of deciduous teeth	3	Rate	1990	2021	22.3241	46.9335	8.29958
312	5	Prevalence	570	Washington	3	Both	27	Age-standardized	681	Caries of deciduous teeth	3	Rate	1990	2021	21.0335	85.0457	-20.1294
313	5	Prevalence	4713	Jambi	3	Both	27	Age-standardized	681	Caries of deciduous teeth	3	Rate	1990	2021	0.582121	6.71038	-5.24594
314	5	Prevalence	4709	Aceh	3	Both	27	Age-standardized	681	Caries of deciduous teeth	3	Rate	1990	2021	1.6339	8.26364	-4.85994
315	5	Prevalence	4651	Mexico City	3	Both	27	Age-standardized	681	Caries of deciduous teeth	3	Rate	1990	2021	-6.15627	31.8156	-32.3659
316	5	Prevalence	4625	South East England	3	Both	27	Age-standardized	681	Caries of deciduous teeth	3	Rate	1990	2021	-33.8438	-17.5927	-48.1835
317	5	Prevalence	4636	Wales	3	Both	27	Age-standardized	681	Caries of deciduous teeth	3	Rate	1990	2021	-1.10863	6.93401	-7.97291
318	5	Prevalence	4662	Oaxaca	3	Both	27	Age-standardized	681	Caries of deciduous teeth	3	Rate	1990	2021	14.9154	25.9809	5.60788
319	5	Prevalence	4722	Central Java	3	Both	27	Age-standardized	681	Caries of deciduous teeth	3	Rate	1990	2021	0.707545	7.17752	-5.42658
320	5	Prevalence	533	Georgia	3	Both	27	Age-standardized	681	Caries of deciduous teeth	3	Rate	1990	2021	18.6519	31.5106	9.5491
321	5	Prevalence	546	Minnesota	3	Both	27	Age-standardized	681	Caries of deciduous teeth	3	Rate	1990	2021	17.0997	27.9671	7.70094
322	5	Prevalence	568	Vermont	3	Both	27	Age-standardized	681	Caries of deciduous teeth	3	Rate	1990	2021	16.7854	27.9551	7.77491
323	5	Prevalence	4664	Quer茅taro	3	Both	27	Age-standardized	681	Caries of deciduous teeth	3	Rate	1990	2021	14.3955	24.188	6.09944
324	5	Prevalence	4720	Jakarta	3	Both	27	Age-standardized	681	Caries of deciduous teeth	3	Rate	1990	2021	-0.504037	6.44837	-6.78392
325	5	Prevalence	557	North Dakota	3	Both	27	Age-standardized	681	Caries of deciduous teeth	3	Rate	1990	2021	15.9483	28.32	6.70527
326	5	Prevalence	4666	San Luis Potos铆	3	Both	27	Age-standardized	681	Caries of deciduous teeth	3	Rate	1990	2021	12.256	22.6936	3.60656
327	5	Prevalence	4649	Chiapas	3	Both	27	Age-standardized	681	Caries of deciduous teeth	3	Rate	1990	2021	-0.512682	46.037	-30.274
328	5	Prevalence	487	Mpumalanga	3	Both	27	Age-standardized	681	Caries of deciduous teeth	3	Rate	1990	2021	7.65461	17.4717	-0.325702
329	5	Prevalence	555	New York	3	Both	27	Age-standardized	681	Caries of deciduous teeth	3	Rate	1990	2021	19.8699	32.3625	10.0659
330	5	Prevalence	4727	West Nusa Tenggara	3	Both	27	Age-standardized	681	Caries of deciduous teeth	3	Rate	1990	2021	0.177652	5.56453	-5.27413
331	5	Prevalence	535	Idaho	3	Both	27	Age-standardized	681	Caries of deciduous teeth	3	Rate	1990	2021	20.1408	82.5023	-21.0241
332	5	Prevalence	4660	Nayarit	3	Both	27	Age-standardized	681	Caries of deciduous teeth	3	Rate	1990	2021	12.7212	22.1085	4.3715
333	5	Prevalence	553	New Jersey	3	Both	27	Age-standardized	681	Caries of deciduous teeth	3	Rate	1990	2021	17.3701	30.4832	8.19527
334	5	Prevalence	564	South Dakota	3	Both	27	Age-standardized	681	Caries of deciduous teeth	3	Rate	1990	2021	16.8266	28.7699	7.33042
335	5	Prevalence	4623	East of England	3	Both	27	Age-standardized	681	Caries of deciduous teeth	3	Rate	1990	2021	-24.8121	1.89177	-43.1015
336	5	Prevalence	544	Massachusetts	3	Both	27	Age-standardized	681	Caries of deciduous teeth	3	Rate	1990	2021	17.0083	29.9461	7.62097
337	5	Prevalence	4671	Tlaxcala	3	Both	27	Age-standardized	681	Caries of deciduous teeth	3	Rate	1990	2021	13.0418	23.8955	3.43681
338	5	Prevalence	542	Maine	3	Both	27	Age-standardized	681	Caries of deciduous teeth	3	Rate	1990	2021	17.3503	29.501	8.34948
339	5	Prevalence	566	Texas	3	Both	27	Age-standardized	681	Caries of deciduous teeth	3	Rate	1990	2021	23.7739	45.6354	10.9393
340	5	Prevalence	4656	Jalisco	3	Both	27	Age-standardized	681	Caries of deciduous teeth	3	Rate	1990	2021	13.1283	22.6023	4.59211
341	5	Prevalence	4621	East Midlands	3	Both	27	Age-standardized	681	Caries of deciduous teeth	3	Rate	1990	2021	-23.1551	5.70049	-42.8754
342	5	Prevalence	529	Connecticut	3	Both	27	Age-standardized	681	Caries of deciduous teeth	3	Rate	1990	2021	5.30328	14.0489	-2.77606
343	5	Prevalence	4619	North West England	3	Both	27	Age-standardized	681	Caries of deciduous teeth	3	Rate	1990	2021	-19.2981	1.78405	-33.867
344	5	Prevalence	4716	Lampung	3	Both	27	Age-standardized	681	Caries of deciduous teeth	3	Rate	1990	2021	0.519366	6.51719	-4.19422
345	5	Prevalence	551	Nevada	3	Both	27	Age-standardized	681	Caries of deciduous teeth	3	Rate	1990	2021	18.6694	32.8132	8.91643
346	5	Prevalence	4729	West Kalimantan	3	Both	27	Age-standardized	681	Caries of deciduous teeth	3	Rate	1990	2021	1.4	9.73335	-5.34697
347	5	Prevalence	531	District of Columbia	3	Both	27	Age-standardized	681	Caries of deciduous teeth	3	Rate	1990	2021	17.0702	29.059	9.51662
348	5	Prevalence	4673	Yucat谩n	3	Both	27	Age-standardized	681	Caries of deciduous teeth	3	Rate	1990	2021	13.332	23.3696	4.04844
349	5	Prevalence	4669	Tabasco	3	Both	27	Age-standardized	681	Caries of deciduous teeth	3	Rate	1990	2021	12.773	24.0473	1.18863
350	5	Prevalence	4718	Riau Islands	3	Both	27	Age-standardized	681	Caries of deciduous teeth	3	Rate	1990	2021	0.396622	5.68486	-5.86171
351	5	Prevalence	4658	Michoac谩n de Ocampo	3	Both	27	Age-standardized	681	Caries of deciduous teeth	3	Rate	1990	2021	12.9718	23.2263	3.19547
352	5	Prevalence	4654	Guerrero	3	Both	27	Age-standardized	681	Caries of deciduous teeth	3	Rate	1990	2021	14.529	24.4591	5.09249
353	5	Prevalence	540	Kentucky	3	Both	27	Age-standardized	681	Caries of deciduous teeth	3	Rate	1990	2021	17.1337	27.3966	8.0523
354	5	Prevalence	4647	Coahuila	3	Both	27	Age-standardized	681	Caries of deciduous teeth	3	Rate	1990	2021	-1.30575	46.4965	-32.2634
355	5	Prevalence	4725	Banten	3	Both	27	Age-standardized	681	Caries of deciduous teeth	3	Rate	1990	2021	0.825507	6.85378	-5.10156
356	5	Prevalence	4645	Baja California Sur	3	Both	27	Age-standardized	681	Caries of deciduous teeth	3	Rate	1990	2021	14.363	26.0154	4.00646
357	5	Prevalence	4712	Riau	3	Both	27	Age-standardized	681	Caries of deciduous teeth	3	Rate	1990	2021	1.62407	9.50112	-3.93895
358	5	Prevalence	4714	South Sumatra	3	Both	27	Age-standardized	681	Caries of deciduous teeth	3	Rate	1990	2021	1.24652	7.87856	-4.16357
359	5	Prevalence	573	Wyoming	3	Both	27	Age-standardized	681	Caries of deciduous teeth	3	Rate	1990	2021	16.7051	31.2841	6.85773
360	5	Prevalence	562	Rhode Island	3	Both	27	Age-standardized	681	Caries of deciduous teeth	3	Rate	1990	2021	17.2543	29.3191	7.84296
361	5	Prevalence	4663	Puebla	3	Both	27	Age-standardized	681	Caries of deciduous teeth	3	Rate	1990	2021	12.2609	22.6597	1.48054
362	5	Prevalence	4665	Quintana Roo	3	Both	27	Age-standardized	681	Caries of deciduous teeth	3	Rate	1990	2021	13.4017	24.1147	5.02114
363	5	Prevalence	4652	Durango	3	Both	27	Age-standardized	681	Caries of deciduous teeth	3	Rate	1990	2021	-1.74316	45.1146	-32.1011
364	5	Prevalence	4643	Aguascalientes	3	Both	27	Age-standardized	681	Caries of deciduous teeth	3	Rate	1990	2021	12.9175	22.9124	3.86209
365	5	Prevalence	4721	West Java	3	Both	27	Age-standardized	681	Caries of deciduous teeth	3	Rate	1990	2021	3.59324	12.2597	-3.75234
366	5	Prevalence	4723	Yogyakarta	3	Both	27	Age-standardized	681	Caries of deciduous teeth	3	Rate	1990	2021	0.341917	7.20281	-5.05269
367	5	Prevalence	4667	Sinaloa	3	Both	27	Age-standardized	681	Caries of deciduous teeth	3	Rate	1990	2021	13.2988	25.2136	3.0389
368	5	Prevalence	4710	North Sumatra	3	Both	27	Age-standardized	681	Caries of deciduous teeth	3	Rate	1990	2021	0.206555	7.16398	-5.79323
369	5	Prevalence	4737	Gorontalo	3	Both	27	Age-standardized	681	Caries of deciduous teeth	3	Rate	1990	2021	0.491919	5.93813	-5.11369
370	5	Prevalence	4739	Maluku	3	Both	27	Age-standardized	681	Caries of deciduous teeth	3	Rate	1990	2021	2.95059	10.489	-3.64036
371	5	Prevalence	4735	South Sulawesi	3	Both	27	Age-standardized	681	Caries of deciduous teeth	3	Rate	1990	2021	1.30263	9.2213	-4.60339
372	5	Prevalence	4752	Amazonas	3	Both	27	Age-standardized	681	Caries of deciduous teeth	3	Rate	1990	2021	7.45923	16.5243	-1.98941
373	5	Prevalence	4730	Central Kalimantan	3	Both	27	Age-standardized	681	Caries of deciduous teeth	3	Rate	1990	2021	0.920914	7.35827	-4.70179
374	5	Prevalence	4719	North Kalimantan	3	Both	27	Age-standardized	681	Caries of deciduous teeth	3	Rate	1990	2021	-0.0632655	5.93777	-6.9429
375	5	Prevalence	4761	Mato Grosso do Sul	3	Both	27	Age-standardized	681	Caries of deciduous teeth	3	Rate	1990	2021	7.53487	18.0366	-1.65816
376	5	Prevalence	4763	Par谩	3	Both	27	Age-standardized	681	Caries of deciduous teeth	3	Rate	1990	2021	8.29198	19.7211	-2.01753
377	5	Prevalence	4772	Rio Grande do Sul	3	Both	27	Age-standardized	681	Caries of deciduous teeth	3	Rate	1990	2021	28.8246	49.0979	11.8381
378	5	Prevalence	4774	Sergipe	3	Both	27	Age-standardized	681	Caries of deciduous teeth	3	Rate	1990	2021	8.02737	17.2171	-0.273573
379	5	Prevalence	4750	Acre	3	Both	27	Age-standardized	681	Caries of deciduous teeth	3	Rate	1990	2021	7.63739	17.9032	-0.481916
380	5	Prevalence	4733	North Sulawesi	3	Both	27	Age-standardized	681	Caries of deciduous teeth	3	Rate	1990	2021	1.63533	8.90586	-3.71576
381	5	Prevalence	4674	Zacatecas	3	Both	27	Age-standardized	681	Caries of deciduous teeth	3	Rate	1990	2021	13.0107	23.0259	4.63543
382	5	Prevalence	4850	Goa	3	Both	27	Age-standardized	681	Caries of deciduous teeth	3	Rate	1990	2021	-9.2393	4.34141	-20.593
383	5	Prevalence	4852	Haryana	3	Both	27	Age-standardized	681	Caries of deciduous teeth	3	Rate	1990	2021	-15.8503	11.6117	-37.1317
384	5	Prevalence	4874	Uttarakhand	3	Both	27	Age-standardized	681	Caries of deciduous teeth	3	Rate	1990	2021	-7.17545	4.06596	-16.3611
385	5	Prevalence	4731	South Kalimantan	3	Both	27	Age-standardized	681	Caries of deciduous teeth	3	Rate	1990	2021	0.883097	9.04519	-5.45178
386	5	Prevalence	4862	Meghalaya	3	Both	27	Age-standardized	681	Caries of deciduous teeth	3	Rate	1990	2021	-9.89666	7.6081	-23.3269
387	5	Prevalence	4745		3	Both	27	Age-standardized	681	Caries of deciduous teeth	3	Rate	1990	2021	-7.3901	25.6032	-29.6337
388	5	Prevalence	4759	Maranh茫o	3	Both	27	Age-standardized	681	Caries of deciduous teeth	3	Rate	1990	2021	0.598776	10.5481	-7.8098
389	5	Prevalence	4770	Rond么nia	3	Both	27	Age-standardized	681	Caries of deciduous teeth	3	Rate	1990	2021	10.6238	21.2328	1.70553
390	5	Prevalence	4742	Papua	3	Both	27	Age-standardized	681	Caries of deciduous teeth	3	Rate	1990	2021	0.596641	7.02408	-4.7151
391	5	Prevalence	4757	Esp铆rito Santo	3	Both	27	Age-standardized	681	Caries of deciduous teeth	3	Rate	1990	2021	6.79556	19.9342	-3.26608
392	5	Prevalence	4864	Nagaland	3	Both	27	Age-standardized	681	Caries of deciduous teeth	3	Rate	1990	2021	-13.6199	9.52061	-29.6234
393	5	Prevalence	4910	Oslo	3	Both	27	Age-standardized	681	Caries of deciduous teeth	3	Rate	1990	2021	5.8493	15.6348	-5.41138
394	5	Prevalence	4846	Chhattisgarh	3	Both	27	Age-standardized	681	Caries of deciduous teeth	3	Rate	1990	2021	0.765084	6.92448	-4.25048
395	5	Prevalence	4768	Rio de Janeiro	3	Both	27	Age-standardized	681	Caries of deciduous teeth	3	Rate	1990	2021	5.85861	15.339	-4.07076
396	5	Prevalence	4766	Pernambuco	3	Both	27	Age-standardized	681	Caries of deciduous teeth	3	Rate	1990	2021	2.38164	13.8559	-7.75845
397	5	Prevalence	4738	West Sulawesi	3	Both	27	Age-standardized	681	Caries of deciduous teeth	3	Rate	1990	2021	0.615934	6.86427	-5.62907
398	5	Prevalence	4860	Maharashtra	3	Both	27	Age-standardized	681	Caries of deciduous teeth	3	Rate	1990	2021	-3.26878	7.94414	-11.8404
399	5	Prevalence	4872	Tripura	3	Both	27	Age-standardized	681	Caries of deciduous teeth	3	Rate	1990	2021	-3.30431	3.48277	-9.96066
400	5	Prevalence	4841	Andhra Pradesh	3	Both	27	Age-standardized	681	Caries of deciduous teeth	3	Rate	1990	2021	-20.5676	3.71211	-36.9559
401	5	Prevalence	4755	Cear谩	3	Both	27	Age-standardized	681	Caries of deciduous teeth	3	Rate	1990	2021	6.91461	16.9845	-2.91437
402	5	Prevalence	4857	Kerala	3	Both	27	Age-standardized	681	Caries of deciduous teeth	3	Rate	1990	2021	-8.98404	9.08841	-23.7029
403	5	Prevalence	4843	Assam	3	Both	27	Age-standardized	681	Caries of deciduous teeth	3	Rate	1990	2021	-3.62018	3.42395	-9.92961
404	5	Prevalence	4855	Jharkhand	3	Both	27	Age-standardized	681	Caries of deciduous teeth	3	Rate	1990	2021	-3.43962	6.07083	-10.5134
405	5	Prevalence	4926	Nordland	3	Both	27	Age-standardized	681	Caries of deciduous teeth	3	Rate	1990	2021	10.3189	20.7945	1.14635
406	5	Prevalence	4753	Amap谩	3	Both	27	Age-standardized	681	Caries of deciduous teeth	3	Rate	1990	2021	12.4513	25.7035	1.09185
407	5	Prevalence	4773	Santa Catarina	3	Both	27	Age-standardized	681	Caries of deciduous teeth	3	Rate	1990	2021	5.90604	16.0998	-3.49463
408	5	Prevalence	4740	North Maluku	3	Both	27	Age-standardized	681	Caries of deciduous teeth	3	Rate	1990	2021	1.12188	6.71989	-4.92225
409	5	Prevalence	4870	Tamil Nadu	3	Both	27	Age-standardized	681	Caries of deciduous teeth	3	Rate	1990	2021	-10.3566	8.42579	-23.1048
410	5	Prevalence	4851	Gujarat	3	Both	27	Age-standardized	681	Caries of deciduous teeth	3	Rate	1990	2021	-0.818369	5.34172	-6.35349
411	5	Prevalence	4762	Mato Grosso	3	Both	27	Age-standardized	681	Caries of deciduous teeth	3	Rate	1990	2021	12.1039	24.2474	1.47206
412	5	Prevalence	4734	Central Sulawesi	3	Both	27	Age-standardized	681	Caries of deciduous teeth	3	Rate	1990	2021	-0.337294	5.52556	-5.99201
413	5	Prevalence	4751	Alagoas	3	Both	27	Age-standardized	681	Caries of deciduous teeth	3	Rate	1990	2021	7.59611	15.8764	-0.920116
414	5	Prevalence	4764	Para铆ba	3	Both	27	Age-standardized	681	Caries of deciduous teeth	3	Rate	1990	2021	10.2178	21.2415	0.644419
415	5	Prevalence	4944	Stockholm	3	Both	27	Age-standardized	681	Caries of deciduous teeth	3	Rate	1990	2021	2.00927	11.0317	-6.03115
416	5	Prevalence	4775	S茫o Paulo	3	Both	27	Age-standardized	681	Caries of deciduous teeth	3	Rate	1990	2021	6.27616	17.8429	-9.3751
417	5	Prevalence	4736	Southeast Sulawesi	3	Both	27	Age-standardized	681	Caries of deciduous teeth	3	Rate	1990	2021	0.837279	7.12756	-4.85085
418	5	Prevalence	4853	Himachal Pradesh	3	Both	27	Age-standardized	681	Caries of deciduous teeth	3	Rate	1990	2021	-19.1255	16.3504	-41.1306
419	5	Prevalence	4868	Rajasthan	3	Both	27	Age-standardized	681	Caries of deciduous teeth	3	Rate	1990	2021	-15.9191	11.5369	-34.3541
420	5	Prevalence	4749	England	3	Both	27	Age-standardized	681	Caries of deciduous teeth	3	Rate	1990	2021	-25.5938	-7.24614	-39.4749
421	5	Prevalence	4875	West Bengal	3	Both	27	Age-standardized	681	Caries of deciduous teeth	3	Rate	1990	2021	-2.10551	4.66017	-8.39271
422	5	Prevalence	4758	Goi谩s	3	Both	27	Age-standardized	681	Caries of deciduous teeth	3	Rate	1990	2021	6.20792	17.9754	-3.34997
423	5	Prevalence	4732	East Kalimantan	3	Both	27	Age-standardized	681	Caries of deciduous teeth	3	Rate	1990	2021	0.370868	7.94391	-5.4396
424	5	Prevalence	4760	Minas Gerais	3	Both	27	Age-standardized	681	Caries of deciduous teeth	3	Rate	1990	2021	-9.84919	4.72128	-20.602
425	5	Prevalence	4865	Odisha	3	Both	27	Age-standardized	681	Caries of deciduous teeth	3	Rate	1990	2021	-19.0506	13.3216	-42.7996
426	5	Prevalence	4863	Mizoram	3	Both	27	Age-standardized	681	Caries of deciduous teeth	3	Rate	1990	2021	-12.4738	7.35976	-27.5466
427	5	Prevalence	4849	Delhi	3	Both	27	Age-standardized	681	Caries of deciduous teeth	3	Rate	1990	2021	-0.851127	6.24838	-6.59234
428	5	Prevalence	4743	European Union	3	Both	27	Age-standardized	681	Caries of deciduous teeth	3	Rate	1990	2021	-18.7126	-12.2495	-24.5404
429	5	Prevalence	4771	Roraima	3	Both	27	Age-standardized	681	Caries of deciduous teeth	3	Rate	1990	2021	6.73109	20.3013	-3.53481
430	5	Prevalence	4767	Piaui	3	Both	27	Age-standardized	681	Caries of deciduous teeth	3	Rate	1990	2021	12.7945	23.9122	3.399
431	5	Prevalence	4769	Rio Grande do Norte	3	Both	27	Age-standardized	681	Caries of deciduous teeth	3	Rate	1990	2021	7.24805	17.9903	-3.13658
432	5	Prevalence	4920	Rogaland	3	Both	27	Age-standardized	681	Caries of deciduous teeth	3	Rate	1990	2021	10.0031	23.509	1.4957
433	5	Prevalence	4873	Uttar Pradesh	3	Both	27	Age-standardized	681	Caries of deciduous teeth	3	Rate	1990	2021	-13.0397	14.5485	-33.1625
434	5	Prevalence	4861	Manipur	3	Both	27	Age-standardized	681	Caries of deciduous teeth	3	Rate	1990	2021	-16.3923	10.6889	-37.906
435	5	Prevalence	4756	Distrito Federal	3	Both	27	Age-standardized	681	Caries of deciduous teeth	3	Rate	1990	2021	18.5117	33.1	7.37911
436	5	Prevalence	4859	Madhya Pradesh	3	Both	27	Age-standardized	681	Caries of deciduous teeth	3	Rate	1990	2021	24.6555	39.652	13.7488
437	5	Prevalence	4842	Arunachal Pradesh	3	Both	27	Age-standardized	681	Caries of deciduous teeth	3	Rate	1990	2021	0.362376	7.29654	-6.27964
438	5	Prevalence	4844	Bihar	3	Both	27	Age-standardized	681	Caries of deciduous teeth	3	Rate	1990	2021	1.5394	9.07402	-4.28864
439	5	Prevalence	4754	Bahia	3	Both	27	Age-standardized	681	Caries of deciduous teeth	3	Rate	1990	2021	4.63349	14.867	-4.61203
440	5	Prevalence	4940	Sweden except Stockholm	3	Both	27	Age-standardized	681	Caries of deciduous teeth	3	Rate	1990	2021	-0.972114	9.98047	-14.5785
441	5	Prevalence	4856	Karnataka	3	Both	27	Age-standardized	681	Caries of deciduous teeth	3	Rate	1990	2021	-16.4917	2.80723	-31.2015
442	5	Prevalence	4765	Paran谩	3	Both	27	Age-standardized	681	Caries of deciduous teeth	3	Rate	1990	2021	9.22207	18.7878	-0.316556
443	5	Prevalence	4741	West Papua	3	Both	27	Age-standardized	681	Caries of deciduous teeth	3	Rate	1990	2021	0.462745	6.3976	-6.57554
444	5	Prevalence	4871	Telangana	3	Both	27	Age-standardized	681	Caries of deciduous teeth	3	Rate	1990	2021	-1.26557	3.70608	-5.78562
445	5	Prevalence	4854	Jammu & Kashmir and Ladakh	3	Both	27	Age-standardized	681	Caries of deciduous teeth	3	Rate	1990	2021	-4.10102	4.52427	-12.0367
446	5	Prevalence	4776	Tocantins	3	Both	27	Age-standardized	681	Caries of deciduous teeth	3	Rate	1990	2021	6.89618	16.2634	-1.56678
447	5	Prevalence	4869	Sikkim	3	Both	27	Age-standardized	681	Caries of deciduous teeth	3	Rate	1990	2021	-13.8743	7.7423	-29.4571
448	5	Prevalence	4867	Punjab	3	Both	27	Age-standardized	681	Caries of deciduous teeth	3	Rate	1990	2021	-15.7829	9.8256	-34.4807
449	5	Prevalence	4923	M酶re og Romsdal	3	Both	27	Age-standardized	681	Caries of deciduous teeth	3	Rate	1990	2021	10.6424	22.3832	2.17821
450	5	Prevalence	35432	Tochigi	3	Both	27	Age-standardized	681	Caries of deciduous teeth	3	Rate	1990	2021	-21.8544	-13.6103	-29.8424
451	5	Prevalence	35434	Saitama	3	Both	27	Age-standardized	681	Caries of deciduous teeth	3	Rate	1990	2021	-21.0828	-12.4886	-28.5088
452	5	Prevalence	35445	Shizuoka	3	Both	27	Age-standardized	681	Caries of deciduous teeth	3	Rate	1990	2021	-20.4517	-9.76543	-31.3022
453	5	Prevalence	35443	Nagano	3	Both	27	Age-standardized	681	Caries of deciduous teeth	3	Rate	1990	2021	-22.4834	13.2885	-47.2074
454	5	Prevalence	35454	Tottori	3	Both	27	Age-standardized	681	Caries of deciduous teeth	3	Rate	1990	2021	-20.0629	-9.17993	-30.1396
455	5	Prevalence	35441	Fukui	3	Both	27	Age-standardized	681	Caries of deciduous teeth	3	Rate	1990	2021	-22.7619	13.6375	-47.6841
456	5	Prevalence	35428	Akita	3	Both	27	Age-standardized	681	Caries of deciduous teeth	3	Rate	1990	2021	-22.3887	11.8285	-48.0577
457	5	Prevalence	35452	Nara	3	Both	27	Age-standardized	681	Caries of deciduous teeth	3	Rate	1990	2021	-21.9268	-13.4466	-28.5892
458	5	Prevalence	35426	Iwate	3	Both	27	Age-standardized	681	Caries of deciduous teeth	3	Rate	1990	2021	-21.3948	-13.3374	-28.6766
459	5	Prevalence	35430	Fukushima	3	Both	27	Age-standardized	681	Caries of deciduous teeth	3	Rate	1990	2021	-22.7955	12.2361	-47.045
460	5	Prevalence	35465	Nagasaki	3	Both	27	Age-standardized	681	Caries of deciduous teeth	3	Rate	1990	2021	-17.9766	21.7622	-43.752
461	5	Prevalence	35448	Shiga	3	Both	27	Age-standardized	681	Caries of deciduous teeth	3	Rate	1990	2021	-21.2277	-11.8215	-28.22
462	5	Prevalence	35463	Fukuoka	3	Both	27	Age-standardized	681	Caries of deciduous teeth	3	Rate	1990	2021	-14.6354	-3.56167	-22.6929
463	5	Prevalence	35439	Toyama	3	Both	27	Age-standardized	681	Caries of deciduous teeth	3	Rate	1990	2021	-22.7679	15.1277	-47.6769
464	5	Prevalence	35459	Tokushima	3	Both	27	Age-standardized	681	Caries of deciduous teeth	3	Rate	1990	2021	-21.9384	-12.7	-28.5709
465	5	Prevalence	35634	Kitui	3	Both	27	Age-standardized	681	Caries of deciduous teeth	3	Rate	1990	2021	-1.40244	4.99783	-7.13315
466	5	Prevalence	35621	Elgeyo-Marakwet	3	Both	27	Age-standardized	681	Caries of deciduous teeth	3	Rate	1990	2021	-1.17509	3.9463	-6.99883
467	5	Prevalence	35433	Gunma	3	Both	27	Age-standardized	681	Caries of deciduous teeth	3	Rate	1990	2021	-22.1248	13.6117	-46.6808
468	5	Prevalence	35435	Chiba	3	Both	27	Age-standardized	681	Caries of deciduous teeth	3	Rate	1990	2021	-22.6031	12.1224	-47.5286
469	5	Prevalence	35623	Garissa	3	Both	27	Age-standardized	681	Caries of deciduous teeth	3	Rate	1990	2021	-14.3301	4.40919	-32.6063
470	5	Prevalence	35632	Kisii	3	Both	27	Age-standardized	681	Caries of deciduous teeth	3	Rate	1990	2021	-1.82159	4.14936	-7.90183
471	5	Prevalence	35470	Okinawa	3	Both	27	Age-standardized	681	Caries of deciduous teeth	3	Rate	1990	2021	-22.259	14.0807	-45.9917
472	5	Prevalence	35444	Gifu	3	Both	27	Age-standardized	681	Caries of deciduous teeth	3	Rate	1990	2021	-20.2302	-8.18726	-32.1836
473	5	Prevalence	35461	Ehime	3	Both	27	Age-standardized	681	Caries of deciduous teeth	3	Rate	1990	2021	-20.631	-11.0573	-30.687
474	5	Prevalence	35437	Kanagawa	3	Both	27	Age-standardized	681	Caries of deciduous teeth	3	Rate	1990	2021	-21.8275	-14.6306	-28.1288
475	5	Prevalence	35446	Aichi	3	Both	27	Age-standardized	681	Caries of deciduous teeth	3	Rate	1990	2021	-21.4518	-12.7111	-29.0948
476	5	Prevalence	35630	Kilifi	3	Both	27	Age-standardized	681	Caries of deciduous teeth	3	Rate	1990	2021	-1.01697	4.67719	-5.97278
477	5	Prevalence	35643	Migori	3	Both	27	Age-standardized	681	Caries of deciduous teeth	3	Rate	1990	2021	-0.93828	5.59485	-6.3366
478	5	Prevalence	35450	艑saka	3	Both	27	Age-standardized	681	Caries of deciduous teeth	3	Rate	1990	2021	-20.6652	-10.1808	-29.9829
479	5	Prevalence	35424	Hokkaid艒	3	Both	27	Age-standardized	681	Caries of deciduous teeth	3	Rate	1990	2021	-20.4886	-9.38015	-31.0146
480	5	Prevalence	35617	Baringo	3	Both	27	Age-standardized	681	Caries of deciduous teeth	3	Rate	1990	2021	-0.965081	7.19482	-7.01868
481	5	Prevalence	35641	Marsabit	3	Both	27	Age-standardized	681	Caries of deciduous teeth	3	Rate	1990	2021	-0.427385	5.49484	-5.72039
482	5	Prevalence	35637	Lamu	3	Both	27	Age-standardized	681	Caries of deciduous teeth	3	Rate	1990	2021	-1.60479	5.26345	-7.08602
483	5	Prevalence	35429	Yamagata	3	Both	27	Age-standardized	681	Caries of deciduous teeth	3	Rate	1990	2021	-22.2846	15.2196	-46.9949
484	5	Prevalence	35453	Wakayama	3	Both	27	Age-standardized	681	Caries of deciduous teeth	3	Rate	1990	2021	-22.7861	11.3516	-47.3751
485	5	Prevalence	35626	Kajiado	3	Both	27	Age-standardized	681	Caries of deciduous teeth	3	Rate	1990	2021	-1.33582	4.61269	-6.80024
486	5	Prevalence	35628	Kericho	3	Both	27	Age-standardized	681	Caries of deciduous teeth	3	Rate	1990	2021	-23.3033	10.8898	-47.3538
487	5	Prevalence	35427	Miyagi	3	Both	27	Age-standardized	681	Caries of deciduous teeth	3	Rate	1990	2021	-22.0257	-13.9775	-30.0085
488	5	Prevalence	35442	Yamanashi	3	Both	27	Age-standardized	681	Caries of deciduous teeth	3	Rate	1990	2021	-21.5138	-13.2578	-29.6829
489	5	Prevalence	35455	Shimane	3	Both	27	Age-standardized	681	Caries of deciduous teeth	3	Rate	1990	2021	-22.3612	13.9994	-47.9912
490	5	Prevalence	35466	Kumamoto	3	Both	27	Age-standardized	681	Caries of deciduous teeth	3	Rate	1990	2021	-20.7319	-10.5679	-30.5957
491	5	Prevalence	35654	Siaya	3	Both	27	Age-standardized	681	Caries of deciduous teeth	3	Rate	1990	2021	-1.89824	3.07511	-9.65418
492	5	Prevalence	35652	Nyeri	3	Both	27	Age-standardized	681	Caries of deciduous teeth	3	Rate	1990	2021	-1.25927	4.35875	-7.15906
493	5	Prevalence	35464	Saga	3	Both	27	Age-standardized	681	Caries of deciduous teeth	3	Rate	1990	2021	-22.2812	15.2949	-47.7236
494	5	Prevalence	35449	Ky艒to	3	Both	27	Age-standardized	681	Caries of deciduous teeth	3	Rate	1990	2021	-21.2343	-11.7847	-29.7608
495	5	Prevalence	35440	Ishikawa	3	Both	27	Age-standardized	681	Caries of deciduous teeth	3	Rate	1990	2021	-22.685	15.5141	-46.7545
496	5	Prevalence	35460	Kagawa	3	Both	27	Age-standardized	681	Caries of deciduous teeth	3	Rate	1990	2021	-20.6259	-9.74786	-32.3656
497	5	Prevalence	35622	Embu	3	Both	27	Age-standardized	681	Caries of deciduous teeth	3	Rate	1990	2021	-1.05276	4.60974	-8.13272
498	5	Prevalence	35639	Makueni	3	Both	27	Age-standardized	681	Caries of deciduous teeth	3	Rate	1990	2021	-0.473326	7.45751	-6.03923
499	5	Prevalence	35650	Nyamira	3	Both	27	Age-standardized	681	Caries of deciduous teeth	3	Rate	1990	2021	-1.84289	4.21017	-7.79789
500	5	Prevalence	35431	Ibaraki	3	Both	27	Age-standardized	681	Caries of deciduous teeth	3	Rate	1990	2021	-22.1889	15.6222	-47.0944
501	5	Prevalence	35619	Bungoma	3	Both	27	Age-standardized	681	Caries of deciduous teeth	3	Rate	1990	2021	-1.13371	4.87412	-6.44518
502	5	Prevalence	35663	West Pokot	3	Both	27	Age-standardized	681	Caries of deciduous teeth	3	Rate	1990	2021	-0.825003	5.4468	-6.58422
503	5	Prevalence	35635	Kwale	3	Both	27	Age-standardized	681	Caries of deciduous teeth	3	Rate	1990	2021	-1.6655	4.67039	-8.05779
504	5	Prevalence	35624	Homa Bay	3	Both	27	Age-standardized	681	Caries of deciduous teeth	3	Rate	1990	2021	-1.01071	6.67895	-7.07655
505	5	Prevalence	35436	T艒ky艒	3	Both	27	Age-standardized	681	Caries of deciduous teeth	3	Rate	1990	2021	-22.9203	12.9488	-47.4414
506	5	Prevalence	35468	Miyazaki	3	Both	27	Age-standardized	681	Caries of deciduous teeth	3	Rate	1990	2021	-20.9115	-11.0377	-29.8582
507	5	Prevalence	35648	Nandi	3	Both	27	Age-standardized	681	Caries of deciduous teeth	3	Rate	1990	2021	-1.27026	3.85985	-6.26101
508	5	Prevalence	35633	Kisumu	3	Both	27	Age-standardized	681	Caries of deciduous teeth	3	Rate	1990	2021	-0.740547	5.92955	-6.44509
509	5	Prevalence	35457	Hiroshima	3	Both	27	Age-standardized	681	Caries of deciduous teeth	3	Rate	1990	2021	-21.7452	-13.6334	-29.5943
510	5	Prevalence	44591	World Bank Income Levels	3	Both	27	Age-standardized	681	Caries of deciduous teeth	3	Rate	1990	2021	-6.87297	2.3239	-13.9212
511	5	Prevalence	35631	Kirinyaga	3	Both	27	Age-standardized	681	Caries of deciduous teeth	3	Rate	1990	2021	-1.1721	5.41216	-6.21584
512	5	Prevalence	35462	K艒chi	3	Both	27	Age-standardized	681	Caries of deciduous teeth	3	Rate	1990	2021	-22.3594	14.3165	-47.5324
513	5	Prevalence	35661	Vihiga	3	Both	27	Age-standardized	681	Caries of deciduous teeth	3	Rate	1990	2021	-0.546407	6.67983	-6.78461
514	5	Prevalence	35447	Mie	3	Both	27	Age-standardized	681	Caries of deciduous teeth	3	Rate	1990	2021	-22.9738	14.813	-47.952
515	5	Prevalence	35644	Mombasa	3	Both	27	Age-standardized	681	Caries of deciduous teeth	3	Rate	1990	2021	-0.60238	5.27133	-5.98141
516	5	Prevalence	35646	Nairobi	3	Both	27	Age-standardized	681	Caries of deciduous teeth	3	Rate	1990	2021	3.8952	11.3388	-3.5654
517	5	Prevalence	35659	Turkana	3	Both	27	Age-standardized	681	Caries of deciduous teeth	3	Rate	1990	2021	-0.602675	5.47001	-7.62286
518	5	Prevalence	35657	Tharaka Nithi	3	Both	27	Age-standardized	681	Caries of deciduous teeth	3	Rate	1990	2021	-1.07932	4.50852	-6.13218
519	5	Prevalence	44566	European Region	3	Both	27	Age-standardized	681	Caries of deciduous teeth	3	Rate	1990	2021	-9.88367	-6.70955	-12.5764
520	5	Prevalence	44568	Western Pacific Region	3	Both	27	Age-standardized	681	Caries of deciduous teeth	3	Rate	1990	2021	-5.55275	-1.6313	-8.95163
521	5	Prevalence	35618	Bomet	3	Both	27	Age-standardized	681	Caries of deciduous teeth	3	Rate	1990	2021	-1.10285	5.02455	-7.21491
522	5	Prevalence	35642	Meru	3	Both	27	Age-standardized	681	Caries of deciduous teeth	3	Rate	1990	2021	-23.21	13.6784	-47.444
523	5	Prevalence	44535	Commonwealth High Income	3	Both	27	Age-standardized	681	Caries of deciduous teeth	3	Rate	1990	2021	5.17228	14.2875	-2.89589
524	5	Prevalence	35629	Kiambu	3	Both	27	Age-standardized	681	Caries of deciduous teeth	3	Rate	1990	2021	-14.5808	21.3911	-41.5295
525	5	Prevalence	35627	Kakamega	3	Both	27	Age-standardized	681	Caries of deciduous teeth	3	Rate	1990	2021	-23.7136	11.31	-47.8955
526	5	Prevalence	35451	Hy艒go	3	Both	27	Age-standardized	681	Caries of deciduous teeth	3	Rate	1990	2021	-22.2029	14.1968	-47.5087
527	5	Prevalence	35456	Okayama	3	Both	27	Age-standardized	681	Caries of deciduous teeth	3	Rate	1990	2021	-21.8576	-2.61127	-39.2491
528	5	Prevalence	44635	High SDI	3	Both	27	Age-standardized	681	Caries of deciduous teeth	3	Rate	1990	2021	-4.64692	-1.08599	-8.11343
529	5	Prevalence	44646	Newcastle upon Tyne	3	Both	27	Age-standardized	681	Caries of deciduous teeth	3	Rate	1990	2021	-39.509	-21.8992	-54.2428
530	5	Prevalence	35638	Machakos	3	Both	27	Age-standardized	681	Caries of deciduous teeth	3	Rate	1990	2021	-1.56758	4.23116	-6.7626
531	5	Prevalence	35655	Taita Taveta	3	Both	27	Age-standardized	681	Caries of deciduous teeth	3	Rate	1990	2021	-0.691255	5.5379	-6.29965
532	5	Prevalence	44648	Redcar and Cleveland	3	Both	27	Age-standardized	681	Caries of deciduous teeth	3	Rate	1990	2021	-33.2821	-18.3917	-49.3597
533	5	Prevalence	35653	Samburu	3	Both	27	Age-standardized	681	Caries of deciduous teeth	3	Rate	1990	2021	-1.29153	4.93955	-7.45122
534	5	Prevalence	35467	艑ita	3	Both	27	Age-standardized	681	Caries of deciduous teeth	3	Rate	1990	2021	-21.8188	-12.6829	-29.376
535	5	Prevalence	44564	Region of the Americas	3	Both	27	Age-standardized	681	Caries of deciduous teeth	3	Rate	1990	2021	4.13334	12.5715	-1.91495
536	5	Prevalence	44537	Commonwealth Low Income	3	Both	27	Age-standardized	681	Caries of deciduous teeth	3	Rate	1990	2021	-10.62	-0.8561	-18.4257
537	5	Prevalence	44577	World Bank Lower Middle Income	3	Both	27	Age-standardized	681	Caries of deciduous teeth	3	Rate	1990	2021	-6.54692	5.3432	-14.9211
538	5	Prevalence	35438	Niigata	3	Both	27	Age-standardized	681	Caries of deciduous teeth	3	Rate	1990	2021	-21.3854	-12.4647	-29.5607
539	5	Prevalence	35640	Mandera	3	Both	27	Age-standardized	681	Caries of deciduous teeth	3	Rate	1990	2021	0.728065	9.41774	-5.81073
540	5	Prevalence	35636	Laikipia	3	Both	27	Age-standardized	681	Caries of deciduous teeth	3	Rate	1990	2021	-1.7997	4.62097	-8.38209
541	5	Prevalence	44587	African Union	3	Both	27	Age-standardized	681	Caries of deciduous teeth	3	Rate	1990	2021	-6.38914	10.3253	-18.087
542	5	Prevalence	35651	Nyandarua	3	Both	27	Age-standardized	681	Caries of deciduous teeth	3	Rate	1990	2021	-1.48434	5.33255	-7.05122
543	5	Prevalence	44655	Cheshire East	3	Both	27	Age-standardized	681	Caries of deciduous teeth	3	Rate	1990	2021	-39.5517	-25.0538	-52.797
544	5	Prevalence	35425	Aomori	3	Both	27	Age-standardized	681	Caries of deciduous teeth	3	Rate	1990	2021	-21.366	-10.6477	-29.9453
545	5	Prevalence	44562	Europe	3	Both	27	Age-standardized	681	Caries of deciduous teeth	3	Rate	1990	2021	-12.7723	-9.04898	-15.9011
546	5	Prevalence	44560	America	3	Both	27	Age-standardized	681	Caries of deciduous teeth	3	Rate	1990	2021	4.13334	12.5715	-1.91495
547	5	Prevalence	35625	Isiolo	3	Both	27	Age-standardized	681	Caries of deciduous teeth	3	Rate	1990	2021	-0.517689	5.9636	-6.60225
548	5	Prevalence	44584	OECD Countries	3	Both	27	Age-standardized	681	Caries of deciduous teeth	3	Rate	1990	2021	-4.41471	0.651428	-8.71118
549	5	Prevalence	35649	Narok	3	Both	27	Age-standardized	681	Caries of deciduous teeth	3	Rate	1990	2021	-0.710993	6.60178	-7.27522
550	5	Prevalence	44644	Northumberland	3	Both	27	Age-standardized	681	Caries of deciduous teeth	3	Rate	1990	2021	-34.0217	-14.7374	-49.1715
551	5	Prevalence	44651	Middlesbrough	3	Both	27	Age-standardized	681	Caries of deciduous teeth	3	Rate	1990	2021	-17.7673	29.8555	-49.9053
552	5	Prevalence	44534	Commonwealth	3	Both	27	Age-standardized	681	Caries of deciduous teeth	3	Rate	1990	2021	-6.39267	6.36346	-15.3682
553	5	Prevalence	44657	Trafford	3	Both	27	Age-standardized	681	Caries of deciduous teeth	3	Rate	1990	2021	-30.8004	-12.0595	-46.3587
554	5	Prevalence	35620	Busia	3	Both	27	Age-standardized	681	Caries of deciduous teeth	3	Rate	1990	2021	-23.2825	11.2516	-47.1826
555	5	Prevalence	44666	Warrington	3	Both	27	Age-standardized	681	Caries of deciduous teeth	3	Rate	1990	2021	-33.5077	-14.9592	-50.9089
556	5	Prevalence	44634	High-middle SDI	3	Both	27	Age-standardized	681	Caries of deciduous teeth	3	Rate	1990	2021	-5.70599	-2.83639	-8.90971
557	5	Prevalence	35662	Wajir	3	Both	27	Age-standardized	681	Caries of deciduous teeth	3	Rate	1990	2021	-1.62545	4.49309	-7.47283
558	5	Prevalence	44668	Rochdale	3	Both	27	Age-standardized	681	Caries of deciduous teeth	3	Rate	1990	2021	-11.9788	0.372988	-23.7855
559	5	Prevalence	35647	Nakuru	3	Both	27	Age-standardized	681	Caries of deciduous teeth	3	Rate	1990	2021	-1.75759	4.33449	-8.60535
560	5	Prevalence	44642	Nordic Region	3	Both	27	Age-standardized	681	Caries of deciduous teeth	3	Rate	1990	2021	3.99791	11.8816	-5.80149
561	5	Prevalence	44677	Manchester	3	Both	27	Age-standardized	681	Caries of deciduous teeth	3	Rate	1990	2021	-27.4061	-10.451	-42.8984
562	5	Prevalence	44638	North America	3	Both	27	Age-standardized	681	Caries of deciduous teeth	3	Rate	1990	2021	20.0777	35.7919	8.43192
563	5	Prevalence	35645	Murang'a	3	Both	27	Age-standardized	681	Caries of deciduous teeth	3	Rate	1990	2021	-1.35917	3.68217	-7.25311
564	5	Prevalence	44653	Sunderland	3	Both	27	Age-standardized	681	Caries of deciduous teeth	3	Rate	1990	2021	-15.2906	34.1768	-49.1412
565	5	Prevalence	44679	East Riding of Yorkshire	3	Both	27	Age-standardized	681	Caries of deciduous teeth	3	Rate	1990	2021	-35.0856	-19.3793	-48.3682
566	5	Prevalence	35660	Uasin Gishu	3	Both	27	Age-standardized	681	Caries of deciduous teeth	3	Rate	1990	2021	-1.74955	3.23759	-7.71644
567	5	Prevalence	44559	Africa	3	Both	27	Age-standardized	681	Caries of deciduous teeth	3	Rate	1990	2021	-6.38914	10.3253	-18.087
568	5	Prevalence	44575	World Bank High Income	3	Both	27	Age-standardized	681	Caries of deciduous teeth	3	Rate	1990	2021	-7.12127	-3.22165	-10.8813
569	5	Prevalence	44567	Eastern Mediterranean Region	3	Both	27	Age-standardized	681	Caries of deciduous teeth	3	Rate	1990	2021	-10.5062	14.6467	-28.3959
570	5	Prevalence	35658	Trans Nzoia	3	Both	27	Age-standardized	681	Caries of deciduous teeth	3	Rate	1990	2021	-1.25203	3.81082	-6.32127
571	5	Prevalence	35469	Kagoshima	3	Both	27	Age-standardized	681	Caries of deciduous teeth	3	Rate	1990	2021	-21.7965	-13.5122	-29.1041
572	5	Prevalence	44536	Commonwealth Middle Income	3	Both	27	Age-standardized	681	Caries of deciduous teeth	3	Rate	1990	2021	-5.98523	7.53111	-15.604
573	5	Prevalence	44636	Low-middle SDI	3	Both	27	Age-standardized	681	Caries of deciduous teeth	3	Rate	1990	2021	-8.82832	7.46904	-20.4542
574	5	Prevalence	35458	Yamaguchi	3	Both	27	Age-standardized	681	Caries of deciduous teeth	3	Rate	1990	2021	-20.6356	-11.3411	-30.7229
575	5	Prevalence	44662	Bolton	3	Both	27	Age-standardized	681	Caries of deciduous teeth	3	Rate	1990	2021	-13.9578	34.4806	-47.3515
576	5	Prevalence	44647	North Tyneside	3	Both	27	Age-standardized	681	Caries of deciduous teeth	3	Rate	1990	2021	-16.4487	36.6969	-50.36
577	5	Prevalence	44675	Knowsley	3	Both	27	Age-standardized	681	Caries of deciduous teeth	3	Rate	1990	2021	-11.5803	42.4925	-45.4782
578	5	Prevalence	35656	Tana River	3	Both	27	Age-standardized	681	Caries of deciduous teeth	3	Rate	1990	2021	-2.02437	3.53978	-10.041
579	5	Prevalence	44538	Other Union Territories	3	Both	27	Age-standardized	681	Caries of deciduous teeth	3	Rate	1990	2021	-3.18847	2.52568	-8.86114
580	5	Prevalence	44565	South-East Asia Region	3	Both	27	Age-standardized	681	Caries of deciduous teeth	3	Rate	1990	2021	-5.21015	4.35518	-12.2046
581	5	Prevalence	44673	Salford	3	Both	27	Age-standardized	681	Caries of deciduous teeth	3	Rate	1990	2021	-4.79955	7.33002	-17.1651
582	5	Prevalence	44671	Liverpool	3	Both	27	Age-standardized	681	Caries of deciduous teeth	3	Rate	1990	2021	-27.1978	-10.8719	-42.2363
583	5	Prevalence	44701	Leicester	3	Both	27	Age-standardized	681	Caries of deciduous teeth	3	Rate	1990	2021	-27.5821	14.7577	-55.1942
584	5	Prevalence	44664	Bury	3	Both	27	Age-standardized	681	Caries of deciduous teeth	3	Rate	1990	2021	-23.8009	24.0358	-53.9693
585	5	Prevalence	44578	World Bank Low Income	3	Both	27	Age-standardized	681	Caries of deciduous teeth	3	Rate	1990	2021	-12.5852	4.49328	-24.7975
586	5	Prevalence	44699	Nottinghamshire	3	Both	27	Age-standardized	681	Caries of deciduous teeth	3	Rate	1990	2021	-11.0896	41.2515	-47.4786
587	5	Prevalence	44649	County Durham	3	Both	27	Age-standardized	681	Caries of deciduous teeth	3	Rate	1990	2021	-12.0244	43.6251	-45.84
588	5	Prevalence	44590	Four World Regions	3	Both	27	Age-standardized	681	Caries of deciduous teeth	3	Rate	1990	2021	-6.87142	2.31851	-13.916
589	5	Prevalence	44690	Doncaster	3	Both	27	Age-standardized	681	Caries of deciduous teeth	3	Rate	1990	2021	-16.3228	36.5815	-49.3452
590	5	Prevalence	44682	Calderdale	3	Both	27	Age-standardized	681	Caries of deciduous teeth	3	Rate	1990	2021	-19.2147	28.2625	-51.2762
591	5	Prevalence	44656	Stockport	3	Both	27	Age-standardized	681	Caries of deciduous teeth	3	Rate	1990	2021	-38.1195	-22.8257	-53.195
592	5	Prevalence	44561	Asia	3	Both	27	Age-standardized	681	Caries of deciduous teeth	3	Rate	1990	2021	-6.17158	2.32702	-12.3923
593	5	Prevalence	44586	G20	3	Both	27	Age-standardized	681	Caries of deciduous teeth	3	Rate	1990	2021	-4.55651	1.97818	-9.39822
594	5	Prevalence	44710	Telford and Wrekin	3	Both	27	Age-standardized	681	Caries of deciduous teeth	3	Rate	1990	2021	-13.3069	38.3236	-47.9292
595	5	Prevalence	44712	Walsall	3	Both	27	Age-standardized	681	Caries of deciduous teeth	3	Rate	1990	2021	-15.5329	35.9275	-48.4023
596	5	Prevalence	44645	Stockton-on-Tees	3	Both	27	Age-standardized	681	Caries of deciduous teeth	3	Rate	1990	2021	-18.1481	31.4101	-50.6801
597	5	Prevalence	44563	African Region	3	Both	27	Age-standardized	681	Caries of deciduous teeth	3	Rate	1990	2021	-6.01119	7.08489	-15.5531
598	5	Prevalence	44697	Derby	3	Both	27	Age-standardized	681	Caries of deciduous teeth	3	Rate	1990	2021	-34.7372	-17.044	-50.1699
599	5	Prevalence	44686	Leeds	3	Both	27	Age-standardized	681	Caries of deciduous teeth	3	Rate	1990	2021	-31.0754	-14.5032	-47.1706
600	5	Prevalence	44688	Wakefield	3	Both	27	Age-standardized	681	Caries of deciduous teeth	3	Rate	1990	2021	-19.7676	27.6312	-50.5205
601	5	Prevalence	44667	Oldham	3	Both	27	Age-standardized	681	Caries of deciduous teeth	3	Rate	1990	2021	-11.1146	0.760531	-24.4516
602	5	Prevalence	44652	South Tyneside	3	Both	27	Age-standardized	681	Caries of deciduous teeth	3	Rate	1990	2021	-29.1605	-14.6784	-43.6932
603	5	Prevalence	44684	Bradford	3	Both	27	Age-standardized	681	Caries of deciduous teeth	3	Rate	1990	2021	-24.5503	-8.01123	-41.4853
604	5	Prevalence	44658	Cheshire West and Chester	3	Both	27	Age-standardized	681	Caries of deciduous teeth	3	Rate	1990	2021	-14.6662	36.9664	-47.3845
605	5	Prevalence	44678	North Yorkshire	3	Both	27	Age-standardized	681	Caries of deciduous teeth	3	Rate	1990	2021	-19.8717	30.9073	-52.541
606	5	Prevalence	44660	Lancashire	3	Both	27	Age-standardized	681	Caries of deciduous teeth	3	Rate	1990	2021	-11.9331	37.3488	-45.4713
607	5	Prevalence	44639	Middle SDI	3	Both	27	Age-standardized	681	Caries of deciduous teeth	3	Rate	1990	2021	-2.30047	3.58263	-6.78661
608	5	Prevalence	44669	Wigan	3	Both	27	Age-standardized	681	Caries of deciduous teeth	3	Rate	1990	2021	-17.8129	-2.57696	-29.9215
609	5	Prevalence	44643	Darlington	3	Both	27	Age-standardized	681	Caries of deciduous teeth	3	Rate	1990	2021	-10.8604	42.7843	-45.7339
610	5	Prevalence	44719	Hertfordshire	3	Both	27	Age-standardized	681	Caries of deciduous teeth	3	Rate	1990	2021	-17.6599	34.8992	-53.1984
611	5	Prevalence	44721	Cambridgeshire	3	Both	27	Age-standardized	681	Caries of deciduous teeth	3	Rate	1990	2021	-18.6386	34.9138	-53.1913
612	5	Prevalence	44654	Hartlepool	3	Both	27	Age-standardized	681	Caries of deciduous teeth	3	Rate	1990	2021	-17.3349	37.4162	-52.5984
613	5	Prevalence	44576	World Bank Upper Middle Income	3	Both	27	Age-standardized	681	Caries of deciduous teeth	3	Rate	1990	2021	-4.44653	-0.0354452	-8.39487
614	5	Prevalence	44680	York	3	Both	27	Age-standardized	681	Caries of deciduous teeth	3	Rate	1990	2021	-44.775	-26.9582	-59.7812
615	5	Prevalence	44732	Bexley	3	Both	27	Age-standardized	681	Caries of deciduous teeth	3	Rate	1990	2021	-4.91354	54.1627	-45.6793
616	5	Prevalence	44637	Low SDI	3	Both	27	Age-standardized	681	Caries of deciduous teeth	3	Rate	1990	2021	-10.152	2.48534	-19.2715
617	5	Prevalence	44726	Luton	3	Both	27	Age-standardized	681	Caries of deciduous teeth	3	Rate	1990	2021	-14.8781	35.5549	-47.6833
618	5	Prevalence	44702	Warwickshire	3	Both	27	Age-standardized	681	Caries of deciduous teeth	3	Rate	1990	2021	-9.50511	44.8289	-45.5475
619	5	Prevalence	44728	Kensington and Chelsea	3	Both	27	Age-standardized	681	Caries of deciduous teeth	3	Rate	1990	2021	-30.6152	-14.1879	-47.6102
620	5	Prevalence	44717	Central Bedfordshire	3	Both	27	Age-standardized	681	Caries of deciduous teeth	3	Rate	1990	2021	-46.6018	-27.5164	-60.2123
621	5	Prevalence	44663	Wirral	3	Both	27	Age-standardized	681	Caries of deciduous teeth	3	Rate	1990	2021	-30.061	-11.9187	-45.6925
622	5	Prevalence	44674	Blackburn with Darwen	3	Both	27	Age-standardized	681	Caries of deciduous teeth	3	Rate	1990	2021	-5.07404	6.33575	-17.2127
623	5	Prevalence	44676	Blackpool	3	Both	27	Age-standardized	681	Caries of deciduous teeth	3	Rate	1990	2021	-10.2639	39.6973	-45.1481
624	5	Prevalence	44672	Tameside	3	Both	27	Age-standardized	681	Caries of deciduous teeth	3	Rate	1990	2021	-15.6491	37.284	-47.9687
625	5	Prevalence	44665	St Helens	3	Both	27	Age-standardized	681	Caries of deciduous teeth	3	Rate	1990	2021	-13.7623	37.9147	-47.6894
626	5	Prevalence	44737	Havering	3	Both	27	Age-standardized	681	Caries of deciduous teeth	3	Rate	1990	2021	-39.8615	-23.2054	-53.6786
627	5	Prevalence	44700	Nottingham	3	Both	27	Age-standardized	681	Caries of deciduous teeth	3	Rate	1990	2021	-14.277	37.5003	-48.0123
628	5	Prevalence	44650	Gateshead	3	Both	27	Age-standardized	681	Caries of deciduous teeth	3	Rate	1990	2021	-20.2341	27.4211	-52.0758
629	5	Prevalence	44695	Lincolnshire	3	Both	27	Age-standardized	681	Caries of deciduous teeth	3	Rate	1990	2021	-11.9059	43.9585	-46.7502
630	5	Prevalence	44743	Hammersmith and Fulham	3	Both	27	Age-standardized	681	Caries of deciduous teeth	3	Rate	1990	2021	-10.2893	43.6293	-46.3919
631	5	Prevalence	44730	Westminster	3	Both	27	Age-standardized	681	Caries of deciduous teeth	3	Rate	1990	2021	-28.2156	-12.5201	-43.7086
632	5	Prevalence	44741	Enfield	3	Both	27	Age-standardized	681	Caries of deciduous teeth	3	Rate	1990	2021	-19.2421	32.7613	-51.0497
633	5	Prevalence	44752	Southwark	3	Both	27	Age-standardized	681	Caries of deciduous teeth	3	Rate	1990	2021	-41.9166	-23.2548	-55.6561
634	5	Prevalence	44659	Sefton	3	Both	27	Age-standardized	681	Caries of deciduous teeth	3	Rate	1990	2021	-16.1772	35.2283	-49.0065
635	5	Prevalence	44683	North Lincolnshire	3	Both	27	Age-standardized	681	Caries of deciduous teeth	3	Rate	1990	2021	-17.7538	32.626	-51.8305
636	5	Prevalence	44735	Brent	3	Both	27	Age-standardized	681	Caries of deciduous teeth	3	Rate	1990	2021	-27.3157	19.7722	-54.0606
637	5	Prevalence	44711	Stoke-on-Trent	3	Both	27	Age-standardized	681	Caries of deciduous teeth	3	Rate	1990	2021	-12.401	41.3401	-44.9278
638	5	Prevalence	44687	Sheffield	3	Both	27	Age-standardized	681	Caries of deciduous teeth	3	Rate	1990	2021	-24.4842	-7.91686	-37.6987
639	5	Prevalence	44713	Wolverhampton	3	Both	27	Age-standardized	681	Caries of deciduous teeth	3	Rate	1990	2021	-16.4109	36.5227	-50.7476
640	5	Prevalence	44739	Sutton	3	Both	27	Age-standardized	681	Caries of deciduous teeth	3	Rate	1990	2021	-40.7465	-21.5361	-56.1894
641	5	Prevalence	44724	Southend-on-Sea	3	Both	27	Age-standardized	681	Caries of deciduous teeth	3	Rate	1990	2021	-18.5536	32.3496	-51.2181
642	5	Prevalence	44704	Solihull	3	Both	27	Age-standardized	681	Caries of deciduous teeth	3	Rate	1990	2021	-14.551	38.3592	-48.392
643	5	Prevalence	44708	Dudley	3	Both	27	Age-standardized	681	Caries of deciduous teeth	3	Rate	1990	2021	-13.7791	40.6874	-47.6541
644	5	Prevalence	44693	Northamptonshire	3	Both	27	Age-standardized	681	Caries of deciduous teeth	3	Rate	1990	2021	-30.9439	-15.7942	-45.9093
645	5	Prevalence	44706	Worcestershire	3	Both	27	Age-standardized	681	Caries of deciduous teeth	3	Rate	1990	2021	-40.8204	-20.9161	-54.719
646	5	Prevalence	44661	Cumbria	3	Both	27	Age-standardized	681	Caries of deciduous teeth	3	Rate	1990	2021	-13.0515	41.5202	-47.138
647	5	Prevalence	44670	Halton	3	Both	27	Age-standardized	681	Caries of deciduous teeth	3	Rate	1990	2021	-28.5697	-12.8445	-43.4682
648	5	Prevalence	44754	Barking and Dagenham	3	Both	27	Age-standardized	681	Caries of deciduous teeth	3	Rate	1990	2021	-31.5748	-15.5123	-46.548
649	5	Prevalence	44722	Thurrock	3	Both	27	Age-standardized	681	Caries of deciduous teeth	3	Rate	1990	2021	-16.1795	34.0687	-49.6092
650	5	Prevalence	44698	Derbyshire	3	Both	27	Age-standardized	681	Caries of deciduous teeth	3	Rate	1990	2021	-23.0987	25.0474	-55.0912
651	5	Prevalence	44720	Essex	3	Both	27	Age-standardized	681	Caries of deciduous teeth	3	Rate	1990	2021	-24.755	-8.95736	-41.2134
652	5	Prevalence	44750	Lewisham	3	Both	27	Age-standardized	681	Caries of deciduous teeth	3	Rate	1990	2021	-39.3943	-23.7748	-53.869
653	5	Prevalence	44715	Sandwell	3	Both	27	Age-standardized	681	Caries of deciduous teeth	3	Rate	1990	2021	-37.2338	-20.369	-52.9079
654	5	Prevalence	44681	North East Lincolnshire	3	Both	27	Age-standardized	681	Caries of deciduous teeth	3	Rate	1990	2021	-19.1017	29.2914	-50.4449
655	5	Prevalence	44733	Redbridge	3	Both	27	Age-standardized	681	Caries of deciduous teeth	3	Rate	1990	2021	-15.194	38.5379	-49.5472
656	5	Prevalence	44729	Barnet	3	Both	27	Age-standardized	681	Caries of deciduous teeth	3	Rate	1990	2021	-17.3462	33.2637	-49.0346
657	5	Prevalence	44746	Wandsworth	3	Both	27	Age-standardized	681	Caries of deciduous teeth	3	Rate	1990	2021	-36.4912	-16.0842	-51.6303
658	5	Prevalence	44748	Camden	3	Both	27	Age-standardized	681	Caries of deciduous teeth	3	Rate	1990	2021	-36.4423	-20.1327	-50.6061
659	5	Prevalence	44727	Richmond upon Thames	3	Both	27	Age-standardized	681	Caries of deciduous teeth	3	Rate	1990	2021	-45.1201	-27.9717	-59.2674
660	5	Prevalence	44763	West Berkshire	3	Both	27	Age-standardized	681	Caries of deciduous teeth	3	Rate	1990	2021	-39.0536	-23.2761	-52.4188
661	5	Prevalence	44703	Herefordshire, County of	3	Both	27	Age-standardized	681	Caries of deciduous teeth	3	Rate	1990	2021	-16.6685	31.5724	-48.3765
662	5	Prevalence	44785	Gloucestershire	3	Both	27	Age-standardized	681	Caries of deciduous teeth	3	Rate	1990	2021	-38.9663	-22.8491	-53.5148
663	5	Prevalence	44718	Suffolk	3	Both	27	Age-standardized	681	Caries of deciduous teeth	3	Rate	1990	2021	-41.8905	-23.4366	-55.2828
664	5	Prevalence	44757	Islington	3	Both	27	Age-standardized	681	Caries of deciduous teeth	3	Rate	1990	2021	-15.8836	-1.0626	-30.2331
665	5	Prevalence	44774	Isle of Wight	3	Both	27	Age-standardized	681	Caries of deciduous teeth	3	Rate	1990	2021	-37.7813	-19.9825	-52.7228
666	5	Prevalence	44738	Kingston upon Thames	3	Both	27	Age-standardized	681	Caries of deciduous teeth	3	Rate	1990	2021	-12.0761	43.8745	-48.4197
667	5	Prevalence	44853	Afar	3	Both	27	Age-standardized	681	Caries of deciduous teeth	3	Rate	1990	2021	-1.6456	3.46223	-6.9499
668	5	Prevalence	44753	Newham	3	Both	27	Age-standardized	681	Caries of deciduous teeth	3	Rate	1990	2021	-30.6034	-17.3669	-44.353
669	5	Prevalence	44742	Croydon	3	Both	27	Age-standardized	681	Caries of deciduous teeth	3	Rate	1990	2021	-17.9148	37.2261	-49.4923
670	5	Prevalence	44731	Bromley	3	Both	27	Age-standardized	681	Caries of deciduous teeth	3	Rate	1990	2021	-19.1659	30.3432	-51.7847
671	5	Prevalence	44714	Birmingham	3	Both	27	Age-standardized	681	Caries of deciduous teeth	3	Rate	1990	2021	-16.6173	35.7998	-49.5307
672	5	Prevalence	44744	Ealing	3	Both	27	Age-standardized	681	Caries of deciduous teeth	3	Rate	1990	2021	-12.356	1.85718	-25.4844
673	5	Prevalence	44776	Southampton	3	Both	27	Age-standardized	681	Caries of deciduous teeth	3	Rate	1990	2021	-21.7436	-7.89206	-35.6368
674	5	Prevalence	44736	Hillingdon	3	Both	27	Age-standardized	681	Caries of deciduous teeth	3	Rate	1990	2021	-27.2064	-11.4665	-43.0607
675	5	Prevalence	44761	Surrey	3	Both	27	Age-standardized	681	Caries of deciduous teeth	3	Rate	1990	2021	-25.4878	-8.28075	-42.7443
676	5	Prevalence	44759	Wokingham	3	Both	27	Age-standardized	681	Caries of deciduous teeth	3	Rate	1990	2021	-49.1209	-32.7474	-63.0573
677	5	Prevalence	44772	East Sussex	3	Both	27	Age-standardized	681	Caries of deciduous teeth	3	Rate	1990	2021	-18.8046	-1.0114	-34.9903
678	5	Prevalence	44779	Dorset	3	Both	27	Age-standardized	681	Caries of deciduous teeth	3	Rate	1990	2021	-36.2716	-17.3152	-51.8782
679	5	Prevalence	44740	Harrow	3	Both	27	Age-standardized	681	Caries of deciduous teeth	3	Rate	1990	2021	-18.4978	30.8907	-50.0287
680	5	Prevalence	44696	Rutland	3	Both	27	Age-standardized	681	Caries of deciduous teeth	3	Rate	1990	2021	-18.9908	30.7295	-50.6612
681	5	Prevalence	44725	Peterborough	3	Both	27	Age-standardized	681	Caries of deciduous teeth	3	Rate	1990	2021	-23.4044	-8.04433	-37.2774
682	5	Prevalence	44723	Norfolk	3	Both	27	Age-standardized	681	Caries of deciduous teeth	3	Rate	1990	2021	-24.5849	23.7278	-53.6109
683	5	Prevalence	44865	Ardebil	3	Both	27	Age-standardized	681	Caries of deciduous teeth	3	Rate	1990	2021	0.430628	7.07908	-5.4225
684	5	Prevalence	44862	Dire Dawa	3	Both	27	Age-standardized	681	Caries of deciduous teeth	3	Rate	1990	2021	-0.0214855	7.59342	-5.20763
685	5	Prevalence	44751	Hounslow	3	Both	27	Age-standardized	681	Caries of deciduous teeth	3	Rate	1990	2021	-31.7547	-14.8653	-47.2715
686	5	Prevalence	44734	Merton	3	Both	27	Age-standardized	681	Caries of deciduous teeth	3	Rate	1990	2021	-37.5121	-20.7864	-52.4355
687	5	Prevalence	44790	Bournemouth	3	Both	27	Age-standardized	681	Caries of deciduous teeth	3	Rate	1990	2021	-35.0491	-16.9238	-50.0508
688	5	Prevalence	44852	Tigray	3	Both	27	Age-standardized	681	Caries of deciduous teeth	3	Rate	1990	2021	-1.13649	4.42454	-6.8416
689	5	Prevalence	44856	Somali	3	Both	27	Age-standardized	681	Caries of deciduous teeth	3	Rate	1990	2021	-0.243222	10.1468	-7.25054
690	5	Prevalence	44755	Haringey	3	Both	27	Age-standardized	681	Caries of deciduous teeth	3	Rate	1990	2021	-29.6493	-14.2852	-43.308
691	5	Prevalence	44858	Southern Nations, Nationalities, and Peoples	3	Both	27	Age-standardized	681	Caries of deciduous teeth	3	Rate	1990	2021	-0.516644	5.1638	-6.52277
692	5	Prevalence	44749	Lambeth	3	Both	27	Age-standardized	681	Caries of deciduous teeth	3	Rate	1990	2021	-39.8208	-24.0573	-55.0474
693	5	Prevalence	44792	Plymouth	3	Both	27	Age-standardized	681	Caries of deciduous teeth	3	Rate	1990	2021	-44.5471	-27.3556	-59.3951
694	5	Prevalence	44765	Bracknell Forest	3	Both	27	Age-standardized	681	Caries of deciduous teeth	3	Rate	1990	2021	-38.1411	-22.7528	-53.7176
695	5	Prevalence	44709	Coventry	3	Both	27	Age-standardized	681	Caries of deciduous teeth	3	Rate	1990	2021	-17.5577	32.1185	-51.2473
696	5	Prevalence	44747	Waltham Forest	3	Both	27	Age-standardized	681	Caries of deciduous teeth	3	Rate	1990	2021	-13.9681	-1.42605	-27.5878
697	5	Prevalence	44868	Bushehr	3	Both	27	Age-standardized	681	Caries of deciduous teeth	3	Rate	1990	2021	-0.212029	5.97677	-5.42376
698	5	Prevalence	44775	Milton Keynes	3	Both	27	Age-standardized	681	Caries of deciduous teeth	3	Rate	1990	2021	-38.8106	-22.4204	-55.2981
699	5	Prevalence	44691	Kingston upon Hull, City of	3	Both	27	Age-standardized	681	Caries of deciduous teeth	3	Rate	1990	2021	-20.5163	-4.58924	-33.9786
700	5	Prevalence	44689	Rotherham	3	Both	27	Age-standardized	681	Caries of deciduous teeth	3	Rate	1990	2021	-26.9648	-11.4982	-41.0347
701	5	Prevalence	44764	Hampshire	3	Both	27	Age-standardized	681	Caries of deciduous teeth	3	Rate	1990	2021	-29.3858	-10.249	-44.9488
702	5	Prevalence	44707	Staffordshire	3	Both	27	Age-standardized	681	Caries of deciduous teeth	3	Rate	1990	2021	-14.6871	40.0584	-49.0055
703	5	Prevalence	44758	Tower Hamlets	3	Both	27	Age-standardized	681	Caries of deciduous teeth	3	Rate	1990	2021	-22.642	-7.28196	-37.1158
704	5	Prevalence	44788	Torbay	3	Both	27	Age-standardized	681	Caries of deciduous teeth	3	Rate	1990	2021	-34.3035	-16.9642	-50.153
705	5	Prevalence	44783	Poole	3	Both	27	Age-standardized	681	Caries of deciduous teeth	3	Rate	1990	2021	-39.0142	-19.5756	-54.8239
706	5	Prevalence	44854	Amhara	3	Both	27	Age-standardized	681	Caries of deciduous teeth	3	Rate	1990	2021	-1.00564	6.33968	-7.49642
707	5	Prevalence	44860	Gambella	3	Both	27	Age-standardized	681	Caries of deciduous teeth	3	Rate	1990	2021	-1.00153	5.17238	-6.86527
708	5	Prevalence	44768	Reading	3	Both	27	Age-standardized	681	Caries of deciduous teeth	3	Rate	1990	2021	-31.2584	-15.4182	-47.3725
709	5	Prevalence	44786	Somerset	3	Both	27	Age-standardized	681	Caries of deciduous teeth	3	Rate	1990	2021	-37.3296	-21.5016	-52.2778
710	5	Prevalence	44885	Lorestan	3	Both	27	Age-standardized	681	Caries of deciduous teeth	3	Rate	1990	2021	0.306426	7.2972	-4.01637
711	5	Prevalence	44780	Wiltshire	3	Both	27	Age-standardized	681	Caries of deciduous teeth	3	Rate	1990	2021	-37.9214	-23.5994	-51.5489
712	5	Prevalence	44773	Portsmouth	3	Both	27	Age-standardized	681	Caries of deciduous teeth	3	Rate	1990	2021	-44.5866	-29.0355	-58.807
713	5	Prevalence	44760	Buckinghamshire	3	Both	27	Age-standardized	681	Caries of deciduous teeth	3	Rate	1990	2021	-37.5089	-19.2292	-51.2178
714	5	Prevalence	44745	Greenwich	3	Both	27	Age-standardized	681	Caries of deciduous teeth	3	Rate	1990	2021	-12.0163	1.53729	-27.3407
715	5	Prevalence	44872	Golestan	3	Both	27	Age-standardized	681	Caries of deciduous teeth	3	Rate	1990	2021	1.34793	9.88216	-4.96702
716	5	Prevalence	44777	Slough	3	Both	27	Age-standardized	681	Caries of deciduous teeth	3	Rate	1990	2021	-23.1852	-9.52047	-38.4452
717	5	Prevalence	44762	Windsor and Maidenhead	3	Both	27	Age-standardized	681	Caries of deciduous teeth	3	Rate	1990	2021	-42.2399	-21.9989	-57.6907
718	5	Prevalence	44887	Mazandaran	3	Both	27	Age-standardized	681	Caries of deciduous teeth	3	Rate	1990	2021	0.598094	9.35707	-5.13802
719	5	Prevalence	44870	Fars	3	Both	27	Age-standardized	681	Caries of deciduous teeth	3	Rate	1990	2021	-0.340659	7.08066	-9.10176
720	5	Prevalence	44894	Zanjan	3	Both	27	Age-standardized	681	Caries of deciduous teeth	3	Rate	1990	2021	0.367004	8.79941	-6.13054
721	5	Prevalence	44892	Tehran	3	Both	27	Age-standardized	681	Caries of deciduous teeth	3	Rate	1990	2021	0.804588	6.48699	-4.26548
722	5	Prevalence	44866	East Azarbayejan	3	Both	27	Age-standardized	681	Caries of deciduous teeth	3	Rate	1990	2021	0.306771	6.53419	-6.78366
723	5	Prevalence	44864	Alborz	3	Both	27	Age-standardized	681	Caries of deciduous teeth	3	Rate	1990	2021	1.54106	8.24002	-3.98536
724	5	Prevalence	44791	Cornwall	3	Both	27	Age-standardized	681	Caries of deciduous teeth	3	Rate	1990	2021	-22.821	-5.88798	-39.3992
725	5	Prevalence	44883	Kohgiluyeh and Boyer-Ahmad	3	Both	27	Age-standardized	681	Caries of deciduous teeth	3	Rate	1990	2021	0.845979	6.06598	-5.01343
726	5	Prevalence	44756	Hackney	3	Both	27	Age-standardized	681	Caries of deciduous teeth	3	Rate	1990	2021	-14.3497	-0.692141	-27.6242
727	5	Prevalence	44874	Hormozgan	3	Both	27	Age-standardized	681	Caries of deciduous teeth	3	Rate	1990	2021	0.584923	9.26135	-5.97227
728	5	Prevalence	44876	Isfahan	3	Both	27	Age-standardized	681	Caries of deciduous teeth	3	Rate	1990	2021	-1.4388	4.19337	-7.56323
729	5	Prevalence	44685	Kirklees	3	Both	27	Age-standardized	681	Caries of deciduous teeth	3	Rate	1990	2021	-18.9734	29.8826	-51.474
730	5	Prevalence	44857	Benishangul-Gumuz	3	Both	27	Age-standardized	681	Caries of deciduous teeth	3	Rate	1990	2021	-1.70066	4.80479	-8.16436
731	5	Prevalence	44859	Harari	3	Both	27	Age-standardized	681	Caries of deciduous teeth	3	Rate	1990	2021	-0.64202	5.49778	-6.23749
732	5	Prevalence	44890	Semnan	3	Both	27	Age-standardized	681	Caries of deciduous teeth	3	Rate	1990	2021	1.11962	8.9708	-5.90492
733	5	Prevalence	44694	Leicestershire	3	Both	27	Age-standardized	681	Caries of deciduous teeth	3	Rate	1990	2021	-33.0084	-18.9388	-49.3903
734	5	Prevalence	44705	Shropshire	3	Both	27	Age-standardized	681	Caries of deciduous teeth	3	Rate	1990	2021	-38.2327	-20.7525	-52.3687
735	5	Prevalence	44770	Brighton and Hove	3	Both	27	Age-standardized	681	Caries of deciduous teeth	3	Rate	1990	2021	-25.7829	-2.62406	-44.2898
736	5	Prevalence	44879	North Khorasan	3	Both	27	Age-standardized	681	Caries of deciduous teeth	3	Rate	1990	2021	-0.0263279	5.83391	-5.68343
737	5	Prevalence	44781	North Somerset	3	Both	27	Age-standardized	681	Caries of deciduous teeth	3	Rate	1990	2021	-40.4795	-23.8043	-55.2947
738	5	Prevalence	44881	South Khorasan	3	Both	27	Age-standardized	681	Caries of deciduous teeth	3	Rate	1990	2021	-0.760708	5.58842	-5.86407
739	5	Prevalence	44869	Chahar Mahaal and Bakhtiari	3	Both	27	Age-standardized	681	Caries of deciduous teeth	3	Rate	1990	2021	-0.671742	6.02619	-8.18134
740	5	Prevalence	44769	Kent	3	Both	27	Age-standardized	681	Caries of deciduous teeth	3	Rate	1990	2021	-46.885	-28.8315	-60.9338
741	5	Prevalence	44861	Addis Ababa	3	Both	27	Age-standardized	681	Caries of deciduous teeth	3	Rate	1990	2021	-0.789245	4.39234	-6.28577
742	5	Prevalence	44789	Bristol, City of	3	Both	27	Age-standardized	681	Caries of deciduous teeth	3	Rate	1990	2021	-35.0209	-17.8607	-49.313
743	5	Prevalence	44787	Swindon	3	Both	27	Age-standardized	681	Caries of deciduous teeth	3	Rate	1990	2021	-26.8727	-12.865	-40.5406
744	5	Prevalence	44886	Markazi	3	Both	27	Age-standardized	681	Caries of deciduous teeth	3	Rate	1990	2021	0.084471	5.01116	-5.55399
745	5	Prevalence	44855	Oromia	3	Both	27	Age-standardized	681	Caries of deciduous teeth	3	Rate	1990	2021	-1.50166	4.1802	-6.96632
746	5	Prevalence	44873	Hamadan	3	Both	27	Age-standardized	681	Caries of deciduous teeth	3	Rate	1990	2021	-10.8254	20.9229	-33.1947
747	5	Prevalence	53617	Gilgit-Baltistan	3	Both	27	Age-standardized	681	Caries of deciduous teeth	3	Rate	1990	2021	-26.1567	-0.983596	-46.3891
748	5	Prevalence	44778	South Gloucestershire	3	Both	27	Age-standardized	681	Caries of deciduous teeth	3	Rate	1990	2021	-48.382	-30.6696	-63.5957
749	5	Prevalence	44888	Qazvin	3	Both	27	Age-standardized	681	Caries of deciduous teeth	3	Rate	1990	2021	-0.233128	5.79228	-5.76271
750	5	Prevalence	44871	Gilan	3	Both	27	Age-standardized	681	Caries of deciduous teeth	3	Rate	1990	2021	-11.1224	22.6256	-34.5765
751	5	Prevalence	53619	Khyber Pakhtunkhwa	3	Both	27	Age-standardized	681	Caries of deciduous teeth	3	Rate	1990	2021	-25.2684	2.67282	-45.3442
752	5	Prevalence	44867	West Azarbayejan	3	Both	27	Age-standardized	681	Caries of deciduous teeth	3	Rate	1990	2021	0.220349	6.28767	-5.41702
753	5	Prevalence	44716	Bedford	3	Both	27	Age-standardized	681	Caries of deciduous teeth	3	Rate	1990	2021	-32.4353	-13.9777	-46.5148
754	5	Prevalence	44884	Kurdistan	3	Both	27	Age-standardized	681	Caries of deciduous teeth	3	Rate	1990	2021	0.461827	6.04532	-5.04152
755	5	Prevalence	44766	West Sussex	3	Both	27	Age-standardized	681	Caries of deciduous teeth	3	Rate	1990	2021	-26.1388	-6.64377	-42.7269
756	5	Prevalence	44893	Yazd	3	Both	27	Age-standardized	681	Caries of deciduous teeth	3	Rate	1990	2021	0.296115	7.35855	-7.75227
757	5	Prevalence	44877	Kerman	3	Both	27	Age-standardized	681	Caries of deciduous teeth	3	Rate	1990	2021	-10.9611	16.8476	-32.4519
758	5	Prevalence	44875	Ilam	3	Both	27	Age-standardized	681	Caries of deciduous teeth	3	Rate	1990	2021	0.542888	8.05086	-5.27918
759	5	Prevalence	53432	Tr酶ndelag	3	Both	27	Age-standardized	681	Caries of deciduous teeth	3	Rate	1990	2021	9.17519	21.0451	-0.279868
760	5	Prevalence	53615	Azad Jammu & Kashmir	3	Both	27	Age-standardized	681	Caries of deciduous teeth	3	Rate	1990	2021	-2.10214	2.53864	-8.7671
761	5	Prevalence	44891	Sistan and Baluchistan	3	Both	27	Age-standardized	681	Caries of deciduous teeth	3	Rate	1990	2021	-1.63814	3.91977	-7.51211
762	5	Prevalence	44882	Khuzestan	3	Both	27	Age-standardized	681	Caries of deciduous teeth	3	Rate	1990	2021	-0.0510197	6.88309	-5.57495
763	5	Prevalence	60135	Innlandet	3	Both	27	Age-standardized	681	Caries of deciduous teeth	3	Rate	1990	2021	10.4093	19.3895	1.85733
764	5	Prevalence	44784	Bath and North East Somerset	3	Both	27	Age-standardized	681	Caries of deciduous teeth	3	Rate	1990	2021	-24.5731	-5.86253	-40.5921
765	5	Prevalence	44880	Khorasan-e-Razavi	3	Both	27	Age-standardized	681	Caries of deciduous teeth	3	Rate	1990	2021	-0.287884	5.34095	-5.90073
766	5	Prevalence	44771	Medway	3	Both	27	Age-standardized	681	Caries of deciduous teeth	3	Rate	1990	2021	-42.2723	-23.7915	-56.3372
767	5	Prevalence	44782	Devon	3	Both	27	Age-standardized	681	Caries of deciduous teeth	3	Rate	1990	2021	-22.8244	-5.80235	-38.8611
768	5	Prevalence	44692	Barnsley	3	Both	27	Age-standardized	681	Caries of deciduous teeth	3	Rate	1990	2021	-24.3186	-8.65924	-37.7015
769	5	Prevalence	94366	Sahel Region	3	Both	27	Age-standardized	681	Caries of deciduous teeth	3	Rate	1990	2021	-1.58843	12.4438	-11.4031
770	5	Prevalence	60133	Agder	3	Both	27	Age-standardized	681	Caries of deciduous teeth	3	Rate	1990	2021	10.3236	23.4348	-0.195841
771	5	Prevalence	53618	Islamabad Capital Territory	3	Both	27	Age-standardized	681	Caries of deciduous teeth	3	Rate	1990	2021	-26.2067	-0.421094	-46.2812
772	5	Prevalence	44889	Qom	3	Both	27	Age-standardized	681	Caries of deciduous teeth	3	Rate	1990	2021	-0.537047	5.89005	-6.64931
773	5	Prevalence	94215	Organization of Islamic Cooperation	3	Both	27	Age-standardized	681	Caries of deciduous teeth	3	Rate	1990	2021	-7.1248	5.44842	-16.1883
774	5	Prevalence	53620	Punjab	3	Both	27	Age-standardized	681	Caries of deciduous teeth	3	Rate	1990	2021	-23.4823	8.31997	-46.5613
775	5	Prevalence	94217	Gulf Cooperation Council	3	Both	27	Age-standardized	681	Caries of deciduous teeth	3	Rate	1990	2021	-4.15415	3.13429	-10.3828
776	5	Prevalence	53616	Balochistan	3	Both	27	Age-standardized	681	Caries of deciduous teeth	3	Rate	1990	2021	-1.54039	3.93922	-8.27659
777	5	Prevalence	95470	Minimal Health System	3	Both	27	Age-standardized	681	Caries of deciduous teeth	3	Rate	1990	2021	-15.7511	6.4718	-31.3655
778	5	Prevalence	95471	Health System Grouping Levels	3	Both	27	Age-standardized	681	Caries of deciduous teeth	3	Rate	1990	2021	-6.87298	2.32387	-13.9211
779	5	Prevalence	95080	Brazil Central-West	3	Both	27	Age-standardized	681	Caries of deciduous teeth	3	Rate	1990	2021	9.98215	19.249	2.43057
780	5	Prevalence	95079	Brazil Northeast	3	Both	27	Age-standardized	681	Caries of deciduous teeth	3	Rate	1990	2021	5.90082	13.6365	-0.837154
781	5	Prevalence	95078	Brazil North	3	Both	27	Age-standardized	681	Caries of deciduous teeth	3	Rate	1990	2021	8.4062	16.2747	0.772644
782	5	Prevalence	60136	Viken	3	Both	27	Age-standardized	681	Caries of deciduous teeth	3	Rate	1990	2021	10.0637	22.8047	1.21002
783	5	Prevalence	44878	Kermanshah	3	Both	27	Age-standardized	681	Caries of deciduous teeth	3	Rate	1990	2021	-0.191411	6.54272	-6.33324
784	5	Prevalence	60132	Vestland	3	Both	27	Age-standardized	681	Caries of deciduous teeth	3	Rate	1990	2021	8.71861	18.9769	-1.25726
785	5	Prevalence	95469	Limited Health System	3	Both	27	Age-standardized	681	Caries of deciduous teeth	3	Rate	1990	2021	-7.19985	5.12259	-16.1373
786	5	Prevalence	60134	Vestfold og Telemark	3	Both	27	Age-standardized	681	Caries of deciduous teeth	3	Rate	1990	2021	9.5005	20.9502	-0.144771
787	5	Prevalence	95082	Brazil Southeast	3	Both	27	Age-standardized	681	Caries of deciduous teeth	3	Rate	1990	2021	2.40338	9.08412	-4.25087
788	5	Prevalence	95468	Basic Health System	3	Both	27	Age-standardized	681	Caries of deciduous teeth	3	Rate	1990	2021	-4.0884	2.38055	-9.01115
789	5	Prevalence	53621	Sindh	3	Both	27	Age-standardized	681	Caries of deciduous teeth	3	Rate	1990	2021	-1.42857	4.01932	-6.84377
790	5	Prevalence	95467	Advanced Health System	3	Both	27	Age-standardized	681	Caries of deciduous teeth	3	Rate	1990	2021	-7.04878	-3.98572	-9.93736
791	5	Prevalence	94216	Association of Southeast Asian Nations	3	Both	27	Age-standardized	681	Caries of deciduous teeth	3	Rate	1990	2021	-3.15194	-1.39142	-4.87262
792	5	Prevalence	94365	Central Africa	3	Both	27	Age-standardized	681	Caries of deciduous teeth	3	Rate	1990	2021	-16.2853	7.90405	-33.109
793	5	Prevalence	44767	Oxfordshire	3	Both	27	Age-standardized	681	Caries of deciduous teeth	3	Rate	1990	2021	-36.735	-19.023	-51.7428
794	5	Prevalence	60137	Troms og Finnmark	3	Both	27	Age-standardized	681	Caries of deciduous teeth	3	Rate	1990	2021	10.1735	24.3448	2.37207
795	5	Prevalence	95081	Brazil South	3	Both	27	Age-standardized	681	Caries of deciduous teeth	3	Rate	1990	2021	15.0832	25.9846	7.04239
