# Supplementary material for: Global, Regional, and National Levels and Trends in Burden of Dental Caries and Periodontal Disease from 1990 to 2035：Result From the Global Burden of Disease Study 2021
Source: Research Square preprint supplement (doi:10.21203/rs.3.rs-5609270/v1), 2025-04-02
Supplement: Supplementary file 2 [file 0a6cac4976991ffc6019c480.xlsx]

## Sheet: Sheet1
Exported data
	measure_id	measure_name	location_id	location_name	sex_id	sex_name	age_id	age_name	cause_id	cause_name	metric_id	metric_name	year_start	year_end	val	upper	lower
1	6	Incidence	27	Independent State of Samoa	3	Both	27	Age-standardized	681	Caries of deciduous teeth	3	Rate	1990	2021	-0.345647	6.37779	-6.9525
2	6	Incidence	5	East Asia	3	Both	27	Age-standardized	681	Caries of deciduous teeth	3	Rate	1990	2021	0.892112	8.80694	-5.46836
3	6	Incidence	64	High-income	3	Both	27	Age-standardized	681	Caries of deciduous teeth	3	Rate	1990	2021	0.911618	8.39433	-4.80466
4	6	Incidence	69	Republic of Singapore	3	Both	27	Age-standardized	681	Caries of deciduous teeth	3	Rate	1990	2021	-0.121942	6.73444	-6.84255
5	6	Incidence	1	Global	3	Both	27	Age-standardized	681	Caries of deciduous teeth	3	Rate	1990	2021	-7.82541	6.2285	-17.3797
6	6	Incidence	37	Kyrgyz Republic	3	Both	27	Age-standardized	681	Caries of deciduous teeth	3	Rate	1990	2021	1.22527	8.09517	-4.05881
7	6	Incidence	59	Republic of Latvia	3	Both	27	Age-standardized	681	Caries of deciduous teeth	3	Rate	1990	2021	-2.25254	7.92914	-12.296
8	6	Incidence	10	Kingdom of Cambodia	3	Both	27	Age-standardized	681	Caries of deciduous teeth	3	Rate	1990	2021	-0.971814	8.06878	-9.21309
9	6	Incidence	42	Central Europe	3	Both	27	Age-standardized	681	Caries of deciduous teeth	3	Rate	1990	2021	-7.48913	-1.51121	-14.8568
10	6	Incidence	74	Principality of Andorra	3	Both	27	Age-standardized	681	Caries of deciduous teeth	3	Rate	1990	2021	-0.4164	7.15695	-7.02628
11	6	Incidence	20	Socialist Republic of Viet Nam	3	Both	27	Age-standardized	681	Caries of deciduous teeth	3	Rate	1990	2021	-0.380372	8.12335	-7.9863
12	6	Incidence	91	Portuguese Republic	3	Both	27	Age-standardized	681	Caries of deciduous teeth	3	Rate	1990	2021	0.893297	12.4086	-9.10537
13	6	Incidence	96	Southern Latin America	3	Both	27	Age-standardized	681	Caries of deciduous teeth	3	Rate	1990	2021	5.49061	16.8881	-3.81158
14	6	Incidence	30	Republic of Vanuatu	3	Both	27	Age-standardized	681	Caries of deciduous teeth	3	Rate	1990	2021	-0.127968	7.69186	-8.01366
15	6	Incidence	32	Central Asia	3	Both	27	Age-standardized	681	Caries of deciduous teeth	3	Rate	1990	2021	0.00739776	3.98958	-3.15891
16	6	Incidence	52	Romania	3	Both	27	Age-standardized	681	Caries of deciduous teeth	3	Rate	1990	2021	-26.7461	-0.0727931	-43.7281
17	6	Incidence	133	Bolivarian Republic of Venezuela	3	Both	27	Age-standardized	681	Caries of deciduous teeth	3	Rate	1990	2021	-23.779	28.3813	-55.3993
18	6	Incidence	57	Republic of Belarus	3	Both	27	Age-standardized	681	Caries of deciduous teeth	3	Rate	1990	2021	0.208737	10.527	-7.56121
19	6	Incidence	15	Republic of the Union of Myanmar	3	Both	27	Age-standardized	681	Caries of deciduous teeth	3	Rate	1990	2021	-1.36679	4.73072	-8.16096
20	6	Incidence	155	Turkey	3	Both	27	Age-standardized	681	Caries of deciduous teeth	3	Rate	1990	2021	0.765456	8.78979	-6.94957
21	6	Incidence	8	Taiwan (Province of China)	3	Both	27	Age-standardized	681	Caries of deciduous teeth	3	Rate	1990	2021	-2.88022	22.5448	-30.8705
22	6	Incidence	138	North Africa and Middle East	3	Both	27	Age-standardized	681	Caries of deciduous teeth	3	Rate	1990	2021	-16.5943	14.6965	-37.6402
23	6	Incidence	101	Canada	3	Both	27	Age-standardized	681	Caries of deciduous teeth	3	Rate	1990	2021	8.13682	37.6829	-9.16773
24	6	Incidence	47	Czech Republic	3	Both	27	Age-standardized	681	Caries of deciduous teeth	3	Rate	1990	2021	-0.979392	5.70145	-7.61702
25	6	Incidence	45	Republic of Bulgaria	3	Both	27	Age-standardized	681	Caries of deciduous teeth	3	Rate	1990	2021	-2.78762	8.9288	-15.8565
26	6	Incidence	62	Russian Federation	3	Both	27	Age-standardized	681	Caries of deciduous teeth	3	Rate	1990	2021	-1.28068	3.9956	-5.5263
27	6	Incidence	25	Federated States of Micronesia	3	Both	27	Age-standardized	681	Caries of deciduous teeth	3	Rate	1990	2021	0.752021	12.7463	-6.12002
28	6	Incidence	198	Zimbabwe	3	Both	27	Age-standardized	681	Caries of deciduous teeth	3	Rate	1990	2021	11.8569	39.0214	-3.84414
29	6	Incidence	67	Japan	3	Both	27	Age-standardized	681	Caries of deciduous teeth	3	Rate	1990	2021	-13.9334	2.79656	-27.3599
30	6	Incidence	72	New Zealand	3	Both	27	Age-standardized	681	Caries of deciduous teeth	3	Rate	1990	2021	-16.4735	-4.52072	-36.1721
31	6	Incidence	123	Republic of Peru	3	Both	27	Age-standardized	681	Caries of deciduous teeth	3	Rate	1990	2021	-0.690656	5.87334	-7.39677
32	6	Incidence	79	Republic of Finland	3	Both	27	Age-standardized	681	Caries of deciduous teeth	3	Rate	1990	2021	95.8995	153.858	43.5737
33	6	Incidence	193	Botswana	3	Both	27	Age-standardized	681	Caries of deciduous teeth	3	Rate	1990	2021	-0.581265	5.94573	-6.64433
34	6	Incidence	128	Republic of Guatemala	3	Both	27	Age-standardized	681	Caries of deciduous teeth	3	Rate	1990	2021	-1.07899	5.32569	-7.29192
35	6	Incidence	89	Kingdom of the Netherlands	3	Both	27	Age-standardized	681	Caries of deciduous teeth	3	Rate	1990	2021	-11.4649	15.8567	-31.6219
36	6	Incidence	106	Commonwealth of the Bahamas	3	Both	27	Age-standardized	681	Caries of deciduous teeth	3	Rate	1990	2021	-1.01584	10.465	-9.94598
37	6	Incidence	104	Caribbean	3	Both	27	Age-standardized	681	Caries of deciduous teeth	3	Rate	1990	2021	-12.9967	15.0976	-33.3765
38	6	Incidence	170	Congo	3	Both	27	Age-standardized	681	Caries of deciduous teeth	3	Rate	1990	2021	0.236316	5.36543	-4.71699
39	6	Incidence	158	South Asia	3	Both	27	Age-standardized	681	Caries of deciduous teeth	3	Rate	1990	2021	-13.03	6.21361	-26.2582
40	6	Incidence	99	Eastern Republic of Uruguay	3	Both	27	Age-standardized	681	Caries of deciduous teeth	3	Rate	1990	2021	-1.05481	4.89664	-7.96452
41	6	Incidence	116	Saint Lucia	3	Both	27	Age-standardized	681	Caries of deciduous teeth	3	Rate	1990	2021	-11.8095	11.8682	-27.994
42	6	Incidence	84	Ireland	3	Both	27	Age-standardized	681	Caries of deciduous teeth	3	Rate	1990	2021	1.08097	15.6626	-8.73231
43	6	Incidence	18	Kingdom of Thailand	3	Both	27	Age-standardized	681	Caries of deciduous teeth	3	Rate	1990	2021	3.2738	20.3485	-8.66159
44	6	Incidence	187	Somalia	3	Both	27	Age-standardized	681	Caries of deciduous teeth	3	Rate	1990	2021	-28.8582	20.2828	-56.1025
45	6	Incidence	94	Swiss Confederation	3	Both	27	Age-standardized	681	Caries of deciduous teeth	3	Rate	1990	2021	-13.0717	3.45015	-35.5932
46	6	Incidence	35	Georgia	3	Both	27	Age-standardized	681	Caries of deciduous teeth	3	Rate	1990	2021	-6.54966	4.80111	-23.7616
47	6	Incidence	13	Malaysia	3	Both	27	Age-standardized	681	Caries of deciduous teeth	3	Rate	1990	2021	18.6208	49.2221	3.33311
48	6	Incidence	131	Republic of Nicaragua	3	Both	27	Age-standardized	681	Caries of deciduous teeth	3	Rate	1990	2021	-23.3107	26.7716	-55.3243
49	6	Incidence	40	Turkmenistan	3	Both	27	Age-standardized	681	Caries of deciduous teeth	3	Rate	1990	2021	-0.906825	5.37084	-6.94264
50	6	Incidence	55	Republic of Slovenia	3	Both	27	Age-standardized	681	Caries of deciduous teeth	3	Rate	1990	2021	0.880464	12.0259	-8.4179
51	6	Incidence	165	Pakistan	3	Both	27	Age-standardized	681	Caries of deciduous teeth	3	Rate	1990	2021	-19.023	11.0675	-39.6941
52	6	Incidence	28	Solomon Islands	3	Both	27	Age-standardized	681	Caries of deciduous teeth	3	Rate	1990	2021	-0.792038	8.72919	-8.60797
53	6	Incidence	23	Republic of Kiribati	3	Both	27	Age-standardized	681	Caries of deciduous teeth	3	Rate	1990	2021	-0.777414	6.08491	-7.87645
54	6	Incidence	148	Morocco	3	Both	27	Age-standardized	681	Caries of deciduous teeth	3	Rate	1990	2021	-23.0252	25.4935	-54.4066
55	6	Incidence	160	Afghanistan	3	Both	27	Age-standardized	681	Caries of deciduous teeth	3	Rate	1990	2021	-22.4729	24.3875	-51.9254
56	6	Incidence	126	Republic of Costa Rica	3	Both	27	Age-standardized	681	Caries of deciduous teeth	3	Rate	1990	2021	-0.343695	5.95323	-5.52039
57	6	Incidence	60	Republic of Lithuania	3	Both	27	Age-standardized	681	Caries of deciduous teeth	3	Rate	1990	2021	6.29153	60.6182	-28.8849
58	6	Incidence	121	Plurinational State of Bolivia	3	Both	27	Age-standardized	681	Caries of deciduous teeth	3	Rate	1990	2021	-0.637325	6.17159	-6.74532
59	6	Incidence	6	People's Republic of China	3	Both	27	Age-standardized	681	Caries of deciduous teeth	3	Rate	1990	2021	0.933612	9.21364	-5.59521
60	6	Incidence	11	Republic of Indonesia	3	Both	27	Age-standardized	681	Caries of deciduous teeth	3	Rate	1990	2021	0.727212	6.84416	-3.68314
61	6	Incidence	77	Republic of Cyprus	3	Both	27	Age-standardized	681	Caries of deciduous teeth	3	Rate	1990	2021	-0.674765	6.5059	-6.77366
62	6	Incidence	111	Dominican Republic	3	Both	27	Age-standardized	681	Caries of deciduous teeth	3	Rate	1990	2021	0.391772	9.83483	-7.81511
63	6	Incidence	191	Zambia	3	Both	27	Age-standardized	681	Caries of deciduous teeth	3	Rate	1990	2021	-1.10134	4.73604	-7.96609
64	6	Incidence	70	Australasia	3	Both	27	Age-standardized	681	Caries of deciduous teeth	3	Rate	1990	2021	50.0948	82.2213	11.4111
65	6	Incidence	240	Europe & Central Asia - WB	3	Both	27	Age-standardized	681	Caries of deciduous teeth	3	Rate	1990	2021	-5.52966	-1.98026	-9.84758
66	6	Incidence	153	Syrian Arab Republic	3	Both	27	Age-standardized	681	Caries of deciduous teeth	3	Rate	1990	2021	-23.4073	22.0826	-54.2056
67	6	Incidence	50	Montenegro	3	Both	27	Age-standardized	681	Caries of deciduous teeth	3	Rate	1990	2021	8.52601	34.6779	-5.22433
68	6	Incidence	163	India	3	Both	27	Age-standardized	681	Caries of deciduous teeth	3	Rate	1990	2021	-13.2484	5.23376	-25.706
69	6	Incidence	143	Republic of Iraq	3	Both	27	Age-standardized	681	Caries of deciduous teeth	3	Rate	1990	2021	-22.7123	24.9713	-53.4077
70	6	Incidence	65	High-income Asia Pacific	3	Both	27	Age-standardized	681	Caries of deciduous teeth	3	Rate	1990	2021	-6.15295	7.71783	-16.6005
71	6	Incidence	203	Cabo Verde	3	Both	27	Age-standardized	681	Caries of deciduous teeth	3	Rate	1990	2021	-1.58467	4.61541	-7.00432
72	6	Incidence	38	Mongolia	3	Both	27	Age-standardized	681	Caries of deciduous teeth	3	Rate	1990	2021	0.431325	8.64969	-6.18933
73	6	Incidence	43	Republic of Albania	3	Both	27	Age-standardized	681	Caries of deciduous teeth	3	Rate	1990	2021	0.882204	10.012	-7.41126
74	6	Incidence	175	Burundi	3	Both	27	Age-standardized	681	Caries of deciduous teeth	3	Rate	1990	2021	-31.426	19.6484	-57.9935
75	6	Incidence	82	Hellenic Republic	3	Both	27	Age-standardized	681	Caries of deciduous teeth	3	Rate	1990	2021	-23.8473	46.7977	-54.9325
76	6	Incidence	185	Rwanda	3	Both	27	Age-standardized	681	Caries of deciduous teeth	3	Rate	1990	2021	-31.0196	17.5698	-59.4656
77	6	Incidence	196	South Africa	3	Both	27	Age-standardized	681	Caries of deciduous teeth	3	Rate	1990	2021	3.28241	12.4147	-2.35232
78	6	Incidence	180	Kenya	3	Both	27	Age-standardized	681	Caries of deciduous teeth	3	Rate	1990	2021	-5.41594	1.79241	-10.7708
79	6	Incidence	109	Republic of Cuba	3	Both	27	Age-standardized	681	Caries of deciduous teeth	3	Rate	1990	2021	-21.2365	23.6909	-52.5866
80	6	Incidence	21	Oceania	3	Both	27	Age-standardized	681	Caries of deciduous teeth	3	Rate	1990	2021	0.374388	5.62197	-4.06074
81	6	Incidence	92	Kingdom of Spain	3	Both	27	Age-standardized	681	Caries of deciduous teeth	3	Rate	1990	2021	-32.8199	-9.85521	-53.7677
82	6	Incidence	136	Republic of Paraguay	3	Both	27	Age-standardized	681	Caries of deciduous teeth	3	Rate	1990	2021	-2.32601	9.12128	-13.2225
83	6	Incidence	87	Grand Duchy of Luxembourg	3	Both	27	Age-standardized	681	Caries of deciduous teeth	3	Rate	1990	2021	-0.535402	5.96689	-7.13755
84	6	Incidence	75	Republic of Austria	3	Both	27	Age-standardized	681	Caries of deciduous teeth	3	Rate	1990	2021	-0.612708	6.35463	-8.61913
85	6	Incidence	248	Eastern Africa	3	Both	27	Age-standardized	681	Caries of deciduous teeth	3	Rate	1990	2021	-8.76668	10.7951	-21.3073
86	6	Incidence	119	Republic of Trinidad and Tobago	3	Both	27	Age-standardized	681	Caries of deciduous teeth	3	Rate	1990	2021	-20.4989	25.9272	-52.103
87	6	Incidence	97	Argentine Republic	3	Both	27	Age-standardized	681	Caries of deciduous teeth	3	Rate	1990	2021	9.34166	27.0299	-4.32545
88	6	Incidence	305	Bermuda	3	Both	27	Age-standardized	681	Caries of deciduous teeth	3	Rate	1990	2021	-0.0509378	6.33205	-8.50414
89	6	Incidence	33	Republic of Armenia	3	Both	27	Age-standardized	681	Caries of deciduous teeth	3	Rate	1990	2021	-0.98912	4.8492	-6.23701
90	6	Incidence	208	Guinea	3	Both	27	Age-standardized	681	Caries of deciduous teeth	3	Rate	1990	2021	-1.38921	4.44293	-7.1787
91	6	Incidence	53	Republic of Serbia	3	Both	27	Age-standardized	681	Caries of deciduous teeth	3	Rate	1990	2021	-3.03992	18.7883	-21.1888
92	6	Incidence	114	Republic of Haiti	3	Both	27	Age-standardized	681	Caries of deciduous teeth	3	Rate	1990	2021	-20.7367	21.7838	-52.5651
93	6	Incidence	31	Central Europe, Eastern Europe, and Central Asia	3	Both	27	Age-standardized	681	Caries of deciduous teeth	3	Rate	1990	2021	-2.75795	-0.140958	-5.13203
94	6	Incidence	173	Gabon	3	Both	27	Age-standardized	681	Caries of deciduous teeth	3	Rate	1990	2021	-30.6032	16.5166	-57.8616
95	6	Incidence	168	Angola	3	Both	27	Age-standardized	681	Caries of deciduous teeth	3	Rate	1990	2021	-30.8733	14.6334	-58.1303
96	6	Incidence	58	Republic of Estonia	3	Both	27	Age-standardized	681	Caries of deciduous teeth	3	Rate	1990	2021	-0.10475	8.19388	-7.97613
97	6	Incidence	9	Southeast Asia	3	Both	27	Age-standardized	681	Caries of deciduous teeth	3	Rate	1990	2021	0.5706	3.60912	-2.31467
98	6	Incidence	218	Togo	3	Both	27	Age-standardized	681	Caries of deciduous teeth	3	Rate	1990	2021	-31.0043	13.5077	-58.9204
99	6	Incidence	243	Middle East & North Africa - WB	3	Both	27	Age-standardized	681	Caries of deciduous teeth	3	Rate	1990	2021	-19.2202	11.5471	-39.4636
100	6	Incidence	4	Southeast Asia, East Asia, and Oceania	3	Both	27	Age-standardized	681	Caries of deciduous teeth	3	Rate	1990	2021	0.972448	6.24858	-3.27214
101	6	Incidence	16	Republic of the Philippines	3	Both	27	Age-standardized	681	Caries of deciduous teeth	3	Rate	1990	2021	-3.14921	4.43947	-9.53041
102	6	Incidence	146	Lebanon	3	Both	27	Age-standardized	681	Caries of deciduous teeth	3	Rate	1990	2021	-22.7469	22.792	-54.4889
103	6	Incidence	263	Western Africa	3	Both	27	Age-standardized	681	Caries of deciduous teeth	3	Rate	1990	2021	-10.3791	2.29112	-18.0886
104	6	Incidence	213	Niger	3	Both	27	Age-standardized	681	Caries of deciduous teeth	3	Rate	1990	2021	-51.0355	-39.5384	-60.4833
105	6	Incidence	134	Tropical Latin America	3	Both	27	Age-standardized	681	Caries of deciduous teeth	3	Rate	1990	2021	9.92709	27.4582	1.82099
106	6	Incidence	178	Eritrea	3	Both	27	Age-standardized	681	Caries of deciduous teeth	3	Rate	1990	2021	-29.9111	18.999	-57.8184
107	6	Incidence	141	Arab Republic of Egypt	3	Both	27	Age-standardized	681	Caries of deciduous teeth	3	Rate	1990	2021	-22.6494	28.6551	-54.1423
108	6	Incidence	48	Hungary	3	Both	27	Age-standardized	681	Caries of deciduous teeth	3	Rate	1990	2021	8.51545	56.1836	-5.64821
109	6	Incidence	139	People's Democratic Republic of Algeria	3	Both	27	Age-standardized	681	Caries of deciduous teeth	3	Rate	1990	2021	-23.0247	24.5856	-54.1209
110	6	Incidence	102	United States of America	3	Both	27	Age-standardized	681	Caries of deciduous teeth	3	Rate	1990	2021	11.1762	33.6411	-0.689279
111	6	Incidence	151	Qatar	3	Both	27	Age-standardized	681	Caries of deciduous teeth	3	Rate	1990	2021	2.67326	19.9078	-10.6341
112	6	Incidence	46	Republic of Croatia	3	Both	27	Age-standardized	681	Caries of deciduous teeth	3	Rate	1990	2021	-0.939207	31.2847	-21.5737
113	6	Incidence	201	Burkina Faso	3	Both	27	Age-standardized	681	Caries of deciduous teeth	3	Rate	1990	2021	-30.799	15.3303	-58.8584
114	6	Incidence	129	Republic of Honduras	3	Both	27	Age-standardized	681	Caries of deciduous teeth	3	Rate	1990	2021	-11.0576	13.9048	-28.973
115	6	Incidence	194	Lesotho	3	Both	27	Age-standardized	681	Caries of deciduous teeth	3	Rate	1990	2021	-26.5531	28.1286	-56.3302
116	6	Incidence	156	United Arab Emirates	3	Both	27	Age-standardized	681	Caries of deciduous teeth	3	Rate	1990	2021	-25.3816	18.4181	-53.1155
117	6	Incidence	68	Republic of Korea	3	Both	27	Age-standardized	681	Caries of deciduous teeth	3	Rate	1990	2021	10.8965	38.7998	-4.68335
118	6	Incidence	206	Gambia	3	Both	27	Age-standardized	681	Caries of deciduous teeth	3	Rate	1990	2021	-17.9613	6.24608	-33.4952
119	6	Incidence	124	Central Latin America	3	Both	27	Age-standardized	681	Caries of deciduous teeth	3	Rate	1990	2021	-8.06072	15.18	-23.3336
120	6	Incidence	26	Independent State of Papua New Guinea	3	Both	27	Age-standardized	681	Caries of deciduous teeth	3	Rate	1990	2021	0.79094	7.68999	-5.07286
121	6	Incidence	216	Senegal	3	Both	27	Age-standardized	681	Caries of deciduous teeth	3	Rate	1990	2021	-2.48908	6.92896	-9.1219
122	6	Incidence	80	French Republic	3	Both	27	Age-standardized	681	Caries of deciduous teeth	3	Rate	1990	2021	41.5998	113.808	-13.4027
123	6	Incidence	95	United Kingdom of Great Britain and Northern Ireland	3	Both	27	Age-standardized	681	Caries of deciduous teeth	3	Rate	1990	2021	-27.62	-10.4808	-41.0289
124	6	Incidence	90	Kingdom of Norway	3	Both	27	Age-standardized	681	Caries of deciduous teeth	3	Rate	1990	2021	3.32321	10.3801	-0.566676
125	6	Incidence	73	Western Europe	3	Both	27	Age-standardized	681	Caries of deciduous teeth	3	Rate	1990	2021	-6.62275	1.63298	-16.6472
126	6	Incidence	482	Eastern Cape	3	Both	27	Age-standardized	681	Caries of deciduous teeth	3	Rate	1990	2021	5.98876	13.8081	-0.970766
127	6	Incidence	183	Mauritius	3	Both	27	Age-standardized	681	Caries of deciduous teeth	3	Rate	1990	2021	-26.5464	17.0246	-55.6761
128	6	Incidence	107	Barbados	3	Both	27	Age-standardized	681	Caries of deciduous teeth	3	Rate	1990	2021	-0.350676	6.82711	-6.73191
129	6	Incidence	63	Ukraine	3	Both	27	Age-standardized	681	Caries of deciduous teeth	3	Rate	1990	2021	0.686637	6.67716	-5.82262
130	6	Incidence	487	Mpumalanga	3	Both	27	Age-standardized	681	Caries of deciduous teeth	3	Rate	1990	2021	5.77323	17.5743	-1.21596
131	6	Incidence	171	Democratic Republic of the Congo	3	Both	27	Age-standardized	681	Caries of deciduous teeth	3	Rate	1990	2021	-30.4135	17.4489	-57.3462
132	6	Incidence	105	Antigua and Barbuda	3	Both	27	Age-standardized	681	Caries of deciduous teeth	3	Rate	1990	2021	-1.27859	6.81107	-8.4511
133	6	Incidence	19	Democratic Republic of Timor-Leste	3	Both	27	Age-standardized	681	Caries of deciduous teeth	3	Rate	1990	2021	-4.20848	12.1677	-22.5865
134	6	Incidence	159	South Asia	3	Both	27	Age-standardized	681	Caries of deciduous teeth	3	Rate	1990	2021	-13.03	6.21361	-26.2582
135	6	Incidence	117	Saint Vincent and the Grenadines	3	Both	27	Age-standardized	681	Caries of deciduous teeth	3	Rate	1990	2021	7.06253	71.6847	-40.9193
136	6	Incidence	85	State of Israel	3	Both	27	Age-standardized	681	Caries of deciduous teeth	3	Rate	1990	2021	3.09497	19.7259	-12.2228
137	6	Incidence	416	Tuvalu	3	Both	27	Age-standardized	681	Caries of deciduous teeth	3	Rate	1990	2021	-0.0647607	7.01868	-5.66699
138	6	Incidence	199	Western Sub-Saharan Africa	3	Both	27	Age-standardized	681	Caries of deciduous teeth	3	Rate	1990	2021	-9.46979	1.7735	-16.4632
139	6	Incidence	14	Republic of Maldives	3	Both	27	Age-standardized	681	Caries of deciduous teeth	3	Rate	1990	2021	-0.304432	8.55917	-6.79751
140	6	Incidence	12	Lao People's Democratic Republic	3	Both	27	Age-standardized	681	Caries of deciduous teeth	3	Rate	1990	2021	0.360735	10.1039	-6.02261
141	6	Incidence	211	Mali	3	Both	27	Age-standardized	681	Caries of deciduous teeth	3	Rate	1990	2021	-1.98662	5.84008	-8.21986
142	6	Incidence	36	Republic of Kazakhstan	3	Both	27	Age-standardized	681	Caries of deciduous teeth	3	Rate	1990	2021	0.149806	6.98503	-6.41802
143	6	Incidence	100	High-income North America	3	Both	27	Age-standardized	681	Caries of deciduous teeth	3	Rate	1990	2021	10.8841	31.6097	-0.923021
144	6	Incidence	351	Guam	3	Both	27	Age-standardized	681	Caries of deciduous teeth	3	Rate	1990	2021	-11.0203	11.4504	-26.6833
145	6	Incidence	149	Palestine	3	Both	27	Age-standardized	681	Caries of deciduous teeth	3	Rate	1990	2021	-22.3131	28.1587	-52.9575
146	6	Incidence	166	Sub-Saharan Africa	3	Both	27	Age-standardized	681	Caries of deciduous teeth	3	Rate	1990	2021	-12.0208	5.66661	-22.3845
147	6	Incidence	41	Republic of Uzbekistan	3	Both	27	Age-standardized	681	Caries of deciduous teeth	3	Rate	1990	2021	0.160463	7.56067	-6.72819
148	6	Incidence	61	Republic of Moldova	3	Both	27	Age-standardized	681	Caries of deciduous teeth	3	Rate	1990	2021	-1.41269	6.40378	-9.28427
149	6	Incidence	56	Eastern Europe	3	Both	27	Age-standardized	681	Caries of deciduous teeth	3	Rate	1990	2021	-0.763914	3.3486	-3.8447
150	6	Incidence	161	Bangladesh	3	Both	27	Age-standardized	681	Caries of deciduous teeth	3	Rate	1990	2021	-1.32229	5.14139	-7.48944
151	6	Incidence	78	Kingdom of Denmark	3	Both	27	Age-standardized	681	Caries of deciduous teeth	3	Rate	1990	2021	-25.1593	-6.5651	-43.7766
152	6	Incidence	192	Southern Sub-Saharan Africa	3	Both	27	Age-standardized	681	Caries of deciduous teeth	3	Rate	1990	2021	2.86287	13.9746	-3.93624
153	6	Incidence	189	United Republic of Tanzania	3	Both	27	Age-standardized	681	Caries of deciduous teeth	3	Rate	1990	2021	15.9497	108.442	-32.1995
154	6	Incidence	112	Grenada	3	Both	27	Age-standardized	681	Caries of deciduous teeth	3	Rate	1990	2021	-0.828177	6.94197	-7.08428
155	6	Incidence	132	Republic of Panama	3	Both	27	Age-standardized	681	Caries of deciduous teeth	3	Rate	1990	2021	-23.3504	28.2035	-55.2323
156	6	Incidence	380	Palau	3	Both	27	Age-standardized	681	Caries of deciduous teeth	3	Rate	1990	2021	-1.5661	6.81821	-9.93264
157	6	Incidence	154	Tunisia	3	Both	27	Age-standardized	681	Caries of deciduous teeth	3	Rate	1990	2021	-0.903359	4.83784	-6.7246
158	6	Incidence	71	Australia	3	Both	27	Age-standardized	681	Caries of deciduous teeth	3	Rate	1990	2021	66.3086	106.269	17.7944
159	6	Incidence	367	Monaco	3	Both	27	Age-standardized	681	Caries of deciduous teeth	3	Rate	1990	2021	-1.42269	4.43633	-7.10195
160	6	Incidence	164	Nepal	3	Both	27	Age-standardized	681	Caries of deciduous teeth	3	Rate	1990	2021	-26.6246	19.2071	-55.5472
161	6	Incidence	24	Republic of the Marshall Islands	3	Both	27	Age-standardized	681	Caries of deciduous teeth	3	Rate	1990	2021	0.0584963	7.05455	-6.92242
162	6	Incidence	66	Brunei Darussalam	3	Both	27	Age-standardized	681	Caries of deciduous teeth	3	Rate	1990	2021	0.266594	6.07945	-4.33032
163	6	Incidence	127	Republic of El Salvador	3	Both	27	Age-standardized	681	Caries of deciduous teeth	3	Rate	1990	2021	-0.690384	7.41021	-7.47206
164	6	Incidence	478	World Bank Regions	3	Both	27	Age-standardized	681	Caries of deciduous teeth	3	Rate	1990	2021	-7.82627	6.23687	-17.381
165	6	Incidence	110	Commonwealth of Dominica	3	Both	27	Age-standardized	681	Caries of deciduous teeth	3	Rate	1990	2021	-0.848783	6.12768	-7.72584
166	6	Incidence	39	Republic of Tajikistan	3	Both	27	Age-standardized	681	Caries of deciduous teeth	3	Rate	1990	2021	-0.022986	6.12288	-6.04868
167	6	Incidence	122	Republic of Ecuador	3	Both	27	Age-standardized	681	Caries of deciduous teeth	3	Rate	1990	2021	2.41173	40.0377	-20.6686
168	6	Incidence	204	Chad	3	Both	27	Age-standardized	681	Caries of deciduous teeth	3	Rate	1990	2021	-2.7118	3.58991	-11.4635
169	6	Incidence	174	Eastern Sub-Saharan Africa	3	Both	27	Age-standardized	681	Caries of deciduous teeth	3	Rate	1990	2021	-11.5684	5.71781	-22.3987
170	6	Incidence	241	Latin America & Caribbean - WB	3	Both	27	Age-standardized	681	Caries of deciduous teeth	3	Rate	1990	2021	-0.701258	11.8959	-9.45999
171	6	Incidence	485	KwaZulu-Natal	3	Both	27	Age-standardized	681	Caries of deciduous teeth	3	Rate	1990	2021	-6.75034	21.6101	-23.7165
172	6	Incidence	93	Kingdom of Sweden	3	Both	27	Age-standardized	681	Caries of deciduous teeth	3	Rate	1990	2021	-6.6673	0.623587	-14.7281
173	6	Incidence	144	Hashemite Kingdom of Jordan	3	Both	27	Age-standardized	681	Caries of deciduous teeth	3	Rate	1990	2021	13.3353	41.254	-1.39318
174	6	Incidence	7	Democratic People's Republic of Korea	3	Both	27	Age-standardized	681	Caries of deciduous teeth	3	Rate	1990	2021	-1.20234	6.17771	-7.81271
175	6	Incidence	197	Eswatini	3	Both	27	Age-standardized	681	Caries of deciduous teeth	3	Rate	1990	2021	1.01182	9.85486	-7.86679
176	6	Incidence	29	Kingdom of Tonga	3	Both	27	Age-standardized	681	Caries of deciduous teeth	3	Rate	1990	2021	0.36158	8.9598	-7.20773
177	6	Incidence	83	Republic of Iceland	3	Both	27	Age-standardized	681	Caries of deciduous teeth	3	Rate	1990	2021	-0.213264	7.33656	-7.45874
178	6	Incidence	490	Western Cape	3	Both	27	Age-standardized	681	Caries of deciduous teeth	3	Rate	1990	2021	6.06485	14.6354	-0.27429
179	6	Incidence	51	Republic of Poland	3	Both	27	Age-standardized	681	Caries of deciduous teeth	3	Rate	1990	2021	-1.40876	0.997317	-4.27385
180	6	Incidence	120	Andean Latin America	3	Both	27	Age-standardized	681	Caries of deciduous teeth	3	Rate	1990	2021	-0.081182	9.7914	-7.82166
181	6	Incidence	209	Guinea-Bissau	3	Both	27	Age-standardized	681	Caries of deciduous teeth	3	Rate	1990	2021	-1.1116	5.78277	-7.96539
182	6	Incidence	186	Seychelles	3	Both	27	Age-standardized	681	Caries of deciduous teeth	3	Rate	1990	2021	-1.16087	5.15916	-7.0893
183	6	Incidence	76	Kingdom of Belgium	3	Both	27	Age-standardized	681	Caries of deciduous teeth	3	Rate	1990	2021	49.9037	109.972	15.5409
184	6	Incidence	374	Niue	3	Both	27	Age-standardized	681	Caries of deciduous teeth	3	Rate	1990	2021	0.464058	7.89843	-6.78514
185	6	Incidence	254	Northern Africa	3	Both	27	Age-standardized	681	Caries of deciduous teeth	3	Rate	1990	2021	-21.3523	24.7681	-50.6048
186	6	Incidence	98	Republic of Chile	3	Both	27	Age-standardized	681	Caries of deciduous teeth	3	Rate	1990	2021	0.581572	7.73731	-6.8391
187	6	Incidence	176	Comoros	3	Both	27	Age-standardized	681	Caries of deciduous teeth	3	Rate	1990	2021	0.619673	9.26681	-5.66161
188	6	Incidence	434	Scotland	3	Both	27	Age-standardized	681	Caries of deciduous teeth	3	Rate	1990	2021	18.6792	61.8688	-10.257
189	6	Incidence	137	North Africa and Middle East	3	Both	27	Age-standardized	681	Caries of deciduous teeth	3	Rate	1990	2021	-16.5943	14.6965	-37.6402
190	6	Incidence	396	San Marino	3	Both	27	Age-standardized	681	Caries of deciduous teeth	3	Rate	1990	2021	-15.4981	11.2789	-32.0085
191	6	Incidence	54	Slovak Republic	3	Both	27	Age-standardized	681	Caries of deciduous teeth	3	Rate	1990	2021	0.233134	6.3678	-5.40872
192	6	Incidence	239	East Asia & Pacific - WB	3	Both	27	Age-standardized	681	Caries of deciduous teeth	3	Rate	1990	2021	1.06612	6.3085	-3.39496
193	6	Incidence	207	Ghana	3	Both	27	Age-standardized	681	Caries of deciduous teeth	3	Rate	1990	2021	-2.31541	4.50621	-9.2241
194	6	Incidence	202	Cameroon	3	Both	27	Age-standardized	681	Caries of deciduous teeth	3	Rate	1990	2021	-1.55686	4.6557	-6.86734
195	6	Incidence	157	Yemen	3	Both	27	Age-standardized	681	Caries of deciduous teeth	3	Rate	1990	2021	-21.6825	25.8592	-53.3482
196	6	Incidence	34	Republic of Azerbaijan	3	Both	27	Age-standardized	681	Caries of deciduous teeth	3	Rate	1990	2021	0.867186	7.61358	-5.67608
197	6	Incidence	103	Latin America and Caribbean	3	Both	27	Age-standardized	681	Caries of deciduous teeth	3	Rate	1990	2021	-1.3545	13.426	-10.9573
198	6	Incidence	298	American Samoa	3	Both	27	Age-standardized	681	Caries of deciduous teeth	3	Rate	1990	2021	-21.4961	23.919	-53.0632
199	6	Incidence	22	Republic of Fiji	3	Both	27	Age-standardized	681	Caries of deciduous teeth	3	Rate	1990	2021	0.463777	11.1505	-6.79669
200	6	Incidence	320	Cook Islands	3	Both	27	Age-standardized	681	Caries of deciduous teeth	3	Rate	1990	2021	-9.90963	12.7292	-25.5189
201	6	Incidence	17	Democratic Socialist Republic of Sri Lanka	3	Both	27	Age-standardized	681	Caries of deciduous teeth	3	Rate	1990	2021	-1.86728	13.4227	-17.0478
202	6	Incidence	140	Kingdom of Bahrain	3	Both	27	Age-standardized	681	Caries of deciduous teeth	3	Rate	1990	2021	-0.151117	6.80881	-7.29826
203	6	Incidence	44	Bosnia and Herzegovina	3	Both	27	Age-standardized	681	Caries of deciduous teeth	3	Rate	1990	2021	10.27	33.826	-2.04011
204	6	Incidence	88	Republic of Malta	3	Both	27	Age-standardized	681	Caries of deciduous teeth	3	Rate	1990	2021	-0.344847	6.40511	-6.07555
205	6	Incidence	244	South Asia - WB	3	Both	27	Age-standardized	681	Caries of deciduous teeth	3	Rate	1990	2021	-13.1904	6.66833	-26.7784
206	6	Incidence	108	Belize	3	Both	27	Age-standardized	681	Caries of deciduous teeth	3	Rate	1990	2021	-0.900527	4.8797	-7.47556
207	6	Incidence	181	Madagascar	3	Both	27	Age-standardized	681	Caries of deciduous teeth	3	Rate	1990	2021	-54.1274	-34.3786	-69.5807
208	6	Incidence	115	Jamaica	3	Both	27	Age-standardized	681	Caries of deciduous teeth	3	Rate	1990	2021	-0.608056	6.4861	-7.15454
209	6	Incidence	169	Central African Republic	3	Both	27	Age-standardized	681	Caries of deciduous teeth	3	Rate	1990	2021	-30.12	18.4847	-58.4494
210	6	Incidence	179	Ethiopia	3	Both	27	Age-standardized	681	Caries of deciduous teeth	3	Rate	1990	2021	-0.342013	2.63554	-3.80655
211	6	Incidence	86	Republic of Italy	3	Both	27	Age-standardized	681	Caries of deciduous teeth	3	Rate	1990	2021	-13.2701	4.87812	-26.3478
212	6	Incidence	147	Libya	3	Both	27	Age-standardized	681	Caries of deciduous teeth	3	Rate	1990	2021	-23.1285	26.7911	-53.7585
213	6	Incidence	195	Namibia	3	Both	27	Age-standardized	681	Caries of deciduous teeth	3	Rate	1990	2021	-27.0053	26.3899	-56.2994
214	6	Incidence	49	North Macedonia	3	Both	27	Age-standardized	681	Caries of deciduous teeth	3	Rate	1990	2021	8.77183	41.5548	-7.91082
215	6	Incidence	125	Republic of Colombia	3	Both	27	Age-standardized	681	Caries of deciduous teeth	3	Rate	1990	2021	-22.6767	26.6158	-55.0349
216	6	Incidence	524	Alaska	3	Both	27	Age-standardized	681	Caries of deciduous teeth	3	Rate	1990	2021	-4.0436	62.5	-44.9469
217	6	Incidence	135	Federative Republic of Brazil	3	Both	27	Age-standardized	681	Caries of deciduous teeth	3	Rate	1990	2021	10.4221	28.7226	2.02922
218	6	Incidence	130	United Mexican States	3	Both	27	Age-standardized	681	Caries of deciduous teeth	3	Rate	1990	2021	-0.125484	13.1163	-8.874
219	6	Incidence	184	Mozambique	3	Both	27	Age-standardized	681	Caries of deciduous teeth	3	Rate	1990	2021	-30.7813	15.1815	-58.8312
220	6	Incidence	214	Nigeria	3	Both	27	Age-standardized	681	Caries of deciduous teeth	3	Rate	1990	2021	-4.71114	12.7054	-15.3104
221	6	Incidence	142	Islamic Republic of Iran	3	Both	27	Age-standardized	681	Caries of deciduous teeth	3	Rate	1990	2021	-2.68056	2.53175	-7.23377
222	6	Incidence	162	Bhutan	3	Both	27	Age-standardized	681	Caries of deciduous teeth	3	Rate	1990	2021	-32.2422	13.0935	-60.1919
223	6	Incidence	546	Minnesota	3	Both	27	Age-standardized	681	Caries of deciduous teeth	3	Rate	1990	2021	12.6724	25.6502	4.81994
224	6	Incidence	172	Equatorial Guinea	3	Both	27	Age-standardized	681	Caries of deciduous teeth	3	Rate	1990	2021	-30.4964	13.4324	-57.0428
225	6	Incidence	483	Free State	3	Both	27	Age-standardized	681	Caries of deciduous teeth	3	Rate	1990	2021	5.92095	14.9927	-0.0538555
226	6	Incidence	152	Saudi Arabia	3	Both	27	Age-standardized	681	Caries of deciduous teeth	3	Rate	1990	2021	-36.6336	-16.1407	-52.6959
227	6	Incidence	217	Sierra Leone	3	Both	27	Age-standardized	681	Caries of deciduous teeth	3	Rate	1990	2021	-29.7547	22.9694	-60.9923
228	6	Incidence	551	Nevada	3	Both	27	Age-standardized	681	Caries of deciduous teeth	3	Rate	1990	2021	12.5247	28.271	3.37673
229	6	Incidence	212	Mauritania	3	Both	27	Age-standardized	681	Caries of deciduous teeth	3	Rate	1990	2021	-1.96271	4.82136	-9.82007
230	6	Incidence	488	North-West	3	Both	27	Age-standardized	681	Caries of deciduous teeth	3	Rate	1990	2021	4.64407	13.2673	-1.73982
231	6	Incidence	385	Puerto Rico	3	Both	27	Age-standardized	681	Caries of deciduous teeth	3	Rate	1990	2021	-20.153	30.7531	-51.8107
232	6	Incidence	529	Connecticut	3	Both	27	Age-standardized	681	Caries of deciduous teeth	3	Rate	1990	2021	7.24042	20.5906	-2.23155
233	6	Incidence	167	Central Sub-Saharan Africa	3	Both	27	Age-standardized	681	Caries of deciduous teeth	3	Rate	1990	2021	-29.4879	16.1334	-55.5807
234	6	Incidence	81	Federal Republic of Germany	3	Both	27	Age-standardized	681	Caries of deciduous teeth	3	Rate	1990	2021	16.0929	53.5747	-9.68825
235	6	Incidence	422	United States Virgin Islands	3	Both	27	Age-standardized	681	Caries of deciduous teeth	3	Rate	1990	2021	-0.589121	8.31165	-7.18334
236	6	Incidence	118	Republic of Suriname	3	Both	27	Age-standardized	681	Caries of deciduous teeth	3	Rate	1990	2021	-10.719	10.3714	-27.6147
237	6	Incidence	556	North Carolina	3	Both	27	Age-standardized	681	Caries of deciduous teeth	3	Rate	1990	2021	11.1712	23.0002	2.74158
238	6	Incidence	4622	West Midlands	3	Both	27	Age-standardized	681	Caries of deciduous teeth	3	Rate	1990	2021	-34.9619	7.19265	-57.2991
239	6	Incidence	205	C么te d'Ivoire	3	Both	27	Age-standardized	681	Caries of deciduous teeth	3	Rate	1990	2021	-1.58194	4.82645	-8.8352
240	6	Incidence	150	Oman	3	Both	27	Age-standardized	681	Caries of deciduous teeth	3	Rate	1990	2021	8.4391	29.1337	-6.1055
241	6	Incidence	479	WHO region	3	Both	27	Age-standardized	681	Caries of deciduous teeth	3	Rate	1990	2021	-7.83204	6.2159	-17.4042
242	6	Incidence	561	Pennsylvania	3	Both	27	Age-standardized	681	Caries of deciduous teeth	3	Rate	1990	2021	11.5939	26.2679	1.59161
243	6	Incidence	539	Kansas	3	Both	27	Age-standardized	681	Caries of deciduous teeth	3	Rate	1990	2021	11.8343	25.7174	1.9248
244	6	Incidence	242	Sub-Saharan Africa - WB	3	Both	27	Age-standardized	681	Caries of deciduous teeth	3	Rate	1990	2021	-11.4515	7.94885	-22.7735
245	6	Incidence	4636	Wales	3	Both	27	Age-standardized	681	Caries of deciduous teeth	3	Rate	1990	2021	0.13665	7.79489	-7.57545
246	6	Incidence	261	Southern Africa	3	Both	27	Age-standardized	681	Caries of deciduous teeth	3	Rate	1990	2021	-11.1236	11.1209	-24.3561
247	6	Incidence	113	Republic of Guyana	3	Both	27	Age-standardized	681	Caries of deciduous teeth	3	Rate	1990	2021	-0.00730493	7.66959	-7.21312
248	6	Incidence	522	Sudan	3	Both	27	Age-standardized	681	Caries of deciduous teeth	3	Rate	1990	2021	7.47376	91.1402	-40.3938
249	6	Incidence	435	South Sudan	3	Both	27	Age-standardized	681	Caries of deciduous teeth	3	Rate	1990	2021	0.328242	6.63704	-8.25305
250	6	Incidence	534	Hawaii	3	Both	27	Age-standardized	681	Caries of deciduous teeth	3	Rate	1990	2021	-9.37192	52.6983	-46.9246
251	6	Incidence	4647	Coahuila	3	Both	27	Age-standardized	681	Caries of deciduous teeth	3	Rate	1990	2021	-17.3312	36.2456	-50.5803
252	6	Incidence	369	Nauru	3	Both	27	Age-standardized	681	Caries of deciduous teeth	3	Rate	1990	2021	-10.8811	11.3481	-26.2764
253	6	Incidence	486	Limpopo	3	Both	27	Age-standardized	681	Caries of deciduous teeth	3	Rate	1990	2021	6.0487	18.5818	-1.11014
254	6	Incidence	190	Uganda	3	Both	27	Age-standardized	681	Caries of deciduous teeth	3	Rate	1990	2021	1.1959	7.87257	-5.10005
255	6	Incidence	566	Texas	3	Both	27	Age-standardized	681	Caries of deciduous teeth	3	Rate	1990	2021	15.3399	38.4636	3.82568
256	6	Incidence	4674	Zacatecas	3	Both	27	Age-standardized	681	Caries of deciduous teeth	3	Rate	1990	2021	3.92574	12.4206	-2.01124
257	6	Incidence	554	New Mexico	3	Both	27	Age-standardized	681	Caries of deciduous teeth	3	Rate	1990	2021	15.5158	40.4214	5.08309
258	6	Incidence	200	Benin	3	Both	27	Age-standardized	681	Caries of deciduous teeth	3	Rate	1990	2021	-2.49118	5.71286	-11.8352
259	6	Incidence	413	Tokelau	3	Both	27	Age-standardized	681	Caries of deciduous teeth	3	Rate	1990	2021	-9.1501	13.0869	-24.5207
260	6	Incidence	544	Massachusetts	3	Both	27	Age-standardized	681	Caries of deciduous teeth	3	Rate	1990	2021	12.4848	27.6445	4.07917
261	6	Incidence	4735	South Sulawesi	3	Both	27	Age-standardized	681	Caries of deciduous teeth	3	Rate	1990	2021	-1.88581	4.054	-10.1973
262	6	Incidence	571	West Virginia	3	Both	27	Age-standardized	681	Caries of deciduous teeth	3	Rate	1990	2021	2.60187	40.25	-17.9759
263	6	Incidence	549	Montana	3	Both	27	Age-standardized	681	Caries of deciduous teeth	3	Rate	1990	2021	12.1744	25.9243	3.76737
264	6	Incidence	177	Djibouti	3	Both	27	Age-standardized	681	Caries of deciduous teeth	3	Rate	1990	2021	-30.6248	18.7626	-57.5635
265	6	Incidence	4669	Tabasco	3	Both	27	Age-standardized	681	Caries of deciduous teeth	3	Rate	1990	2021	4.82277	13.0839	-1.21817
266	6	Incidence	210	Liberia	3	Both	27	Age-standardized	681	Caries of deciduous teeth	3	Rate	1990	2021	-1.65275	4.89752	-7.68988
267	6	Incidence	4652	Durango	3	Both	27	Age-standardized	681	Caries of deciduous teeth	3	Rate	1990	2021	-16.2424	38.6802	-49.1966
268	6	Incidence	4620	Yorkshire and the Humber	3	Both	27	Age-standardized	681	Caries of deciduous teeth	3	Rate	1990	2021	-34.4708	-15.8271	-49.7852
269	6	Incidence	4713	Jambi	3	Both	27	Age-standardized	681	Caries of deciduous teeth	3	Rate	1990	2021	-1.62481	3.79979	-9.57171
270	6	Incidence	4740	North Maluku	3	Both	27	Age-standardized	681	Caries of deciduous teeth	3	Rate	1990	2021	-1.28877	5.7278	-7.67736
271	6	Incidence	4625	South East England	3	Both	27	Age-standardized	681	Caries of deciduous teeth	3	Rate	1990	2021	-32.9336	-17.592	-54.2432
272	6	Incidence	376	Northern Mariana Islands	3	Both	27	Age-standardized	681	Caries of deciduous teeth	3	Rate	1990	2021	-1.10077	5.46106	-8.16021
273	6	Incidence	4645	Baja California Sur	3	Both	27	Age-standardized	681	Caries of deciduous teeth	3	Rate	1990	2021	3.42804	11.4516	-3.75388
274	6	Incidence	4771	Roraima	3	Both	27	Age-standardized	681	Caries of deciduous teeth	3	Rate	1990	2021	8.24973	26.4921	-3.47921
275	6	Incidence	527	California	3	Both	27	Age-standardized	681	Caries of deciduous teeth	3	Rate	1990	2021	16.1635	39.2513	4.50355
276	6	Incidence	4718	Riau Islands	3	Both	27	Age-standardized	681	Caries of deciduous teeth	3	Rate	1990	2021	-0.274437	6.95765	-7.0722
277	6	Incidence	4662	Oaxaca	3	Both	27	Age-standardized	681	Caries of deciduous teeth	3	Rate	1990	2021	4.86426	14.5248	-3.19965
278	6	Incidence	532	Florida	3	Both	27	Age-standardized	681	Caries of deciduous teeth	3	Rate	1990	2021	-6.10129	59.6262	-44.7715
279	6	Incidence	145	State of Kuwait	3	Both	27	Age-standardized	681	Caries of deciduous teeth	3	Rate	1990	2021	17.4	42.3483	-5.21163
280	6	Incidence	4657	M茅xico	3	Both	27	Age-standardized	681	Caries of deciduous teeth	3	Rate	1990	2021	3.22768	12.2153	-4.43316
281	6	Incidence	4723	Yogyakarta	3	Both	27	Age-standardized	681	Caries of deciduous teeth	3	Rate	1990	2021	-1.16666	5.42896	-8.62297
282	6	Incidence	525	Arizona	3	Both	27	Age-standardized	681	Caries of deciduous teeth	3	Rate	1990	2021	31.9668	72.3359	11.5919
283	6	Incidence	4667	Sinaloa	3	Both	27	Age-standardized	681	Caries of deciduous teeth	3	Rate	1990	2021	4.62249	11.5548	-2.28152
284	6	Incidence	542	Maine	3	Both	27	Age-standardized	681	Caries of deciduous teeth	3	Rate	1990	2021	11.0936	23.9357	1.97684
285	6	Incidence	4749	England	3	Both	27	Age-standardized	681	Caries of deciduous teeth	3	Rate	1990	2021	-33.7784	-15.7893	-48.8086
286	6	Incidence	559	Oklahoma	3	Both	27	Age-standardized	681	Caries of deciduous teeth	3	Rate	1990	2021	15.8428	39.7263	5.24234
287	6	Incidence	537	Indiana	3	Both	27	Age-standardized	681	Caries of deciduous teeth	3	Rate	1990	2021	26.7036	130.514	-29.0363
288	6	Incidence	4733	North Sulawesi	3	Both	27	Age-standardized	681	Caries of deciduous teeth	3	Rate	1990	2021	-2.56862	4.54893	-11.2568
289	6	Incidence	4776	Tocantins	3	Both	27	Age-standardized	681	Caries of deciduous teeth	3	Rate	1990	2021	8.21699	30.3094	-4.02509
290	6	Incidence	4672	Veracruz de Ignacio de la Llave	3	Both	27	Age-standardized	681	Caries of deciduous teeth	3	Rate	1990	2021	4.99318	17.1508	-3.17094
291	6	Incidence	4728	East Nusa Tenggara	3	Both	27	Age-standardized	681	Caries of deciduous teeth	3	Rate	1990	2021	-1.69993	5.35221	-7.77084
292	6	Incidence	4754	Bahia	3	Both	27	Age-standardized	681	Caries of deciduous teeth	3	Rate	1990	2021	2.77064	15.1912	-4.68479
293	6	Incidence	349	Greenland	3	Both	27	Age-standardized	681	Caries of deciduous teeth	3	Rate	1990	2021	-0.141332	6.0436	-6.89661
294	6	Incidence	569	Virginia	3	Both	27	Age-standardized	681	Caries of deciduous teeth	3	Rate	1990	2021	12.7493	29.4096	4.48588
295	6	Incidence	4618	North East England	3	Both	27	Age-standardized	681	Caries of deciduous teeth	3	Rate	1990	2021	-33.8364	-1.31039	-53.4243
296	6	Incidence	4650	Chihuahua	3	Both	27	Age-standardized	681	Caries of deciduous teeth	3	Rate	1990	2021	-16.6823	35.0525	-49.2667
297	6	Incidence	4711	West Sumatra	3	Both	27	Age-standardized	681	Caries of deciduous teeth	3	Rate	1990	2021	-1.69889	4.47607	-8.8481
298	6	Incidence	564	South Dakota	3	Both	27	Age-standardized	681	Caries of deciduous teeth	3	Rate	1990	2021	12.4633	26.4223	2.62427
299	6	Incidence	4655	Hidalgo	3	Both	27	Age-standardized	681	Caries of deciduous teeth	3	Rate	1990	2021	5.75995	13.3222	-0.136388
300	6	Incidence	4759	Maranh茫o	3	Both	27	Age-standardized	681	Caries of deciduous teeth	3	Rate	1990	2021	6.60438	23.8378	-3.76755
301	6	Incidence	182	Malawi	3	Both	27	Age-standardized	681	Caries of deciduous teeth	3	Rate	1990	2021	-0.153582	6.20149	-7.88784
302	6	Incidence	4743	European Union	3	Both	27	Age-standardized	681	Caries of deciduous teeth	3	Rate	1990	2021	-7.75199	-0.408644	-17.3704
303	6	Incidence	4764	Para铆ba	3	Both	27	Age-standardized	681	Caries of deciduous teeth	3	Rate	1990	2021	6.33307	27.1416	-5.11321
304	6	Incidence	4738	West Sulawesi	3	Both	27	Age-standardized	681	Caries of deciduous teeth	3	Rate	1990	2021	-1.6538	6.32818	-8.82086
305	6	Incidence	484	Gauteng	3	Both	27	Age-standardized	681	Caries of deciduous teeth	3	Rate	1990	2021	6.32728	13.2545	-0.429756
306	6	Incidence	4846	Chhattisgarh	3	Both	27	Age-standardized	681	Caries of deciduous teeth	3	Rate	1990	2021	-12.152	4.60384	-23.2855
307	6	Incidence	215	Sao Tome and Principe	3	Both	27	Age-standardized	681	Caries of deciduous teeth	3	Rate	1990	2021	-31.5183	13.815	-59.7756
308	6	Incidence	4769	Rio Grande do Norte	3	Both	27	Age-standardized	681	Caries of deciduous teeth	3	Rate	1990	2021	7.03289	27.5076	-4.37274
309	6	Incidence	4721	West Java	3	Both	27	Age-standardized	681	Caries of deciduous teeth	3	Rate	1990	2021	10.8921	43.9478	-4.90979
310	6	Incidence	393	Saint Kitts and Nevis	3	Both	27	Age-standardized	681	Caries of deciduous teeth	3	Rate	1990	2021	-0.806099	6.57272	-7.32217
311	6	Incidence	547	Mississippi	3	Both	27	Age-standardized	681	Caries of deciduous teeth	3	Rate	1990	2021	3.67379	16.6001	-3.99639
312	6	Incidence	4843	Assam	3	Both	27	Age-standardized	681	Caries of deciduous teeth	3	Rate	1990	2021	-2.44215	5.52417	-10.2682
313	6	Incidence	4623	East of England	3	Both	27	Age-standardized	681	Caries of deciduous teeth	3	Rate	1990	2021	-34.8386	-7.17851	-51.8526
314	6	Incidence	4660	Nayarit	3	Both	27	Age-standardized	681	Caries of deciduous teeth	3	Rate	1990	2021	3.47342	11.0313	-3.21228
315	6	Incidence	4665	Quintana Roo	3	Both	27	Age-standardized	681	Caries of deciduous teeth	3	Rate	1990	2021	4.65344	11.6681	-2.70785
316	6	Incidence	4875	West Bengal	3	Both	27	Age-standardized	681	Caries of deciduous teeth	3	Rate	1990	2021	-5.71167	3.52562	-13.2324
317	6	Incidence	562	Rhode Island	3	Both	27	Age-standardized	681	Caries of deciduous teeth	3	Rate	1990	2021	11.8706	24.7365	3.38635
318	6	Incidence	489	Northern Cape	3	Both	27	Age-standardized	681	Caries of deciduous teeth	3	Rate	1990	2021	6.44982	14.9863	-0.197084
319	6	Incidence	4774	Sergipe	3	Both	27	Age-standardized	681	Caries of deciduous teeth	3	Rate	1990	2021	8.28105	31.809	-3.65936
320	6	Incidence	4716	Lampung	3	Both	27	Age-standardized	681	Caries of deciduous teeth	3	Rate	1990	2021	-1.27616	7.04764	-9.29184
321	6	Incidence	552	New Hampshire	3	Both	27	Age-standardized	681	Caries of deciduous teeth	3	Rate	1990	2021	13.1582	32.5932	3.79258
322	6	Incidence	433	Northern Ireland	3	Both	27	Age-standardized	681	Caries of deciduous teeth	3	Rate	1990	2021	7.44062	22.7798	-3.14091
323	6	Incidence	4643	Aguascalientes	3	Both	27	Age-standardized	681	Caries of deciduous teeth	3	Rate	1990	2021	3.83484	12.1907	-3.28213
324	6	Incidence	4864	Nagaland	3	Both	27	Age-standardized	681	Caries of deciduous teeth	3	Rate	1990	2021	-18.4929	8.85826	-37.0073
325	6	Incidence	557	North Dakota	3	Both	27	Age-standardized	681	Caries of deciduous teeth	3	Rate	1990	2021	12.6436	27.0652	4.00506
326	6	Incidence	4752	Amazonas	3	Both	27	Age-standardized	681	Caries of deciduous teeth	3	Rate	1990	2021	7.85031	28.7561	-2.35946
327	6	Incidence	535	Idaho	3	Both	27	Age-standardized	681	Caries of deciduous teeth	3	Rate	1990	2021	-7.16808	60.4685	-46.046
328	6	Incidence	4731	South Kalimantan	3	Both	27	Age-standardized	681	Caries of deciduous teeth	3	Rate	1990	2021	-0.723962	6.17454	-9.47323
329	6	Incidence	4872	Tripura	3	Both	27	Age-standardized	681	Caries of deciduous teeth	3	Rate	1990	2021	-8.40944	3.27029	-17.9036
330	6	Incidence	523	Alabama	3	Both	27	Age-standardized	681	Caries of deciduous teeth	3	Rate	1990	2021	11.3752	28.3683	2.96994
331	6	Incidence	4870	Tamil Nadu	3	Both	27	Age-standardized	681	Caries of deciduous teeth	3	Rate	1990	2021	-20.7944	12.3455	-42.5746
332	6	Incidence	540	Kentucky	3	Both	27	Age-standardized	681	Caries of deciduous teeth	3	Rate	1990	2021	11.5015	27.7039	2.65134
333	6	Incidence	530	Delaware	3	Both	27	Age-standardized	681	Caries of deciduous teeth	3	Rate	1990	2021	11.4805	27.9169	3.08258
334	6	Incidence	4648	Colima	3	Both	27	Age-standardized	681	Caries of deciduous teeth	3	Rate	1990	2021	-17.1623	33.543	-51.2844
335	6	Incidence	4726	Bali	3	Both	27	Age-standardized	681	Caries of deciduous teeth	3	Rate	1990	2021	-2.5152	5.43342	-11.7654
336	6	Incidence	4736	Southeast Sulawesi	3	Both	27	Age-standardized	681	Caries of deciduous teeth	3	Rate	1990	2021	-1.9857	5.17034	-10.0952
337	6	Incidence	567	Utah	3	Both	27	Age-standardized	681	Caries of deciduous teeth	3	Rate	1990	2021	12.2227	27.868	3.30953
338	6	Incidence	4920	Rogaland	3	Both	27	Age-standardized	681	Caries of deciduous teeth	3	Rate	1990	2021	2.7806	12.7681	-6.29929
339	6	Incidence	4757	Esp铆rito Santo	3	Both	27	Age-standardized	681	Caries of deciduous teeth	3	Rate	1990	2021	8.76461	33.1471	-3.76731
340	6	Incidence	4709	Aceh	3	Both	27	Age-standardized	681	Caries of deciduous teeth	3	Rate	1990	2021	-0.531036	7.62377	-8.472
341	6	Incidence	4940	Sweden except Stockholm	3	Both	27	Age-standardized	681	Caries of deciduous teeth	3	Rate	1990	2021	-7.62663	1.30362	-16.8476
342	6	Incidence	4762	Mato Grosso	3	Both	27	Age-standardized	681	Caries of deciduous teeth	3	Rate	1990	2021	6.86991	29.1237	-8.4224
343	6	Incidence	35441	Fukui	3	Both	27	Age-standardized	681	Caries of deciduous teeth	3	Rate	1990	2021	-26.1017	18.7107	-56.1829
344	6	Incidence	4851	Gujarat	3	Both	27	Age-standardized	681	Caries of deciduous teeth	3	Rate	1990	2021	-6.27908	0.54595	-17.0768
345	6	Incidence	533	Georgia	3	Both	27	Age-standardized	681	Caries of deciduous teeth	3	Rate	1990	2021	11.0687	28.7288	1.34351
346	6	Incidence	4767	Piaui	3	Both	27	Age-standardized	681	Caries of deciduous teeth	3	Rate	1990	2021	6.99776	30.9369	-8.7322
347	6	Incidence	35446	Aichi	3	Both	27	Age-standardized	681	Caries of deciduous teeth	3	Rate	1990	2021	-7.55886	0.470488	-15.6673
348	6	Incidence	545	Michigan	3	Both	27	Age-standardized	681	Caries of deciduous teeth	3	Rate	1990	2021	11.3201	25.6247	3.02079
349	6	Incidence	4670	Tamaulipas	3	Both	27	Age-standardized	681	Caries of deciduous teeth	3	Rate	1990	2021	3.19118	11.7314	-3.91784
350	6	Incidence	4663	Puebla	3	Both	27	Age-standardized	681	Caries of deciduous teeth	3	Rate	1990	2021	5.31229	14.7788	-1.87073
351	6	Incidence	4653	Guanajuato	3	Both	27	Age-standardized	681	Caries of deciduous teeth	3	Rate	1990	2021	5.96298	14.2094	-0.488387
352	6	Incidence	35424	Hokkaid艒	3	Both	27	Age-standardized	681	Caries of deciduous teeth	3	Rate	1990	2021	-7.96125	-1.70538	-15.413
353	6	Incidence	4621	East Midlands	3	Both	27	Age-standardized	681	Caries of deciduous teeth	3	Rate	1990	2021	-35.1729	-5.30335	-53.9976
354	6	Incidence	555	New York	3	Both	27	Age-standardized	681	Caries of deciduous teeth	3	Rate	1990	2021	12.5436	30.9504	1.93132
355	6	Incidence	572	Wisconsin	3	Both	27	Age-standardized	681	Caries of deciduous teeth	3	Rate	1990	2021	12.3171	28.1482	3.17707
356	6	Incidence	550	Nebraska	3	Both	27	Age-standardized	681	Caries of deciduous teeth	3	Rate	1990	2021	-6.30683	59.7177	-46.5056
357	6	Incidence	4772	Rio Grande do Sul	3	Both	27	Age-standardized	681	Caries of deciduous teeth	3	Rate	1990	2021	25.5284	60.2514	6.48318
358	6	Incidence	4668	Sonora	3	Both	27	Age-standardized	681	Caries of deciduous teeth	3	Rate	1990	2021	3.8457	12.7311	-4.32769
359	6	Incidence	4719	North Kalimantan	3	Both	27	Age-standardized	681	Caries of deciduous teeth	3	Rate	1990	2021	-0.433419	6.48681	-7.75232
360	6	Incidence	4658	Michoac谩n de Ocampo	3	Both	27	Age-standardized	681	Caries of deciduous teeth	3	Rate	1990	2021	4.7289	16.7579	-2.30462
361	6	Incidence	4626	South West England	3	Both	27	Age-standardized	681	Caries of deciduous teeth	3	Rate	1990	2021	-35.0003	-17.3304	-55.6238
362	6	Incidence	4856	Karnataka	3	Both	27	Age-standardized	681	Caries of deciduous teeth	3	Rate	1990	2021	-17.7364	9.68631	-34.6354
363	6	Incidence	4862	Meghalaya	3	Both	27	Age-standardized	681	Caries of deciduous teeth	3	Rate	1990	2021	-24.1923	14.3238	-51.9252
364	6	Incidence	528	Colorado	3	Both	27	Age-standardized	681	Caries of deciduous teeth	3	Rate	1990	2021	-5.96883	59.1274	-45.6248
365	6	Incidence	570	Washington	3	Both	27	Age-standardized	681	Caries of deciduous teeth	3	Rate	1990	2021	-6.50638	59.6722	-46.2303
366	6	Incidence	543	Maryland	3	Both	27	Age-standardized	681	Caries of deciduous teeth	3	Rate	1990	2021	12.9215	28.8613	4.15845
367	6	Incidence	4741	West Papua	3	Both	27	Age-standardized	681	Caries of deciduous teeth	3	Rate	1990	2021	-1.50725	5.78943	-8.27047
368	6	Incidence	538	Iowa	3	Both	27	Age-standardized	681	Caries of deciduous teeth	3	Rate	1990	2021	54.5026	185.697	-16.0926
369	6	Incidence	4750	Acre	3	Both	27	Age-standardized	681	Caries of deciduous teeth	3	Rate	1990	2021	7.76639	32.6698	-4.82266
370	6	Incidence	526	Arkansas	3	Both	27	Age-standardized	681	Caries of deciduous teeth	3	Rate	1990	2021	15.9843	40.1866	4.43938
371	6	Incidence	4646	Campeche	3	Both	27	Age-standardized	681	Caries of deciduous teeth	3	Rate	1990	2021	2.41808	42.8526	-19.7763
372	6	Incidence	4859	Madhya Pradesh	3	Both	27	Age-standardized	681	Caries of deciduous teeth	3	Rate	1990	2021	-12.4157	-6.6064	-18.9791
373	6	Incidence	4673	Yucat谩n	3	Both	27	Age-standardized	681	Caries of deciduous teeth	3	Rate	1990	2021	5.32529	12.3677	-0.96059
374	6	Incidence	4714	South Sumatra	3	Both	27	Age-standardized	681	Caries of deciduous teeth	3	Rate	1990	2021	-2.425	3.95695	-10.0889
375	6	Incidence	4841	Andhra Pradesh	3	Both	27	Age-standardized	681	Caries of deciduous teeth	3	Rate	1990	2021	-19.4694	10.7754	-40.1767
376	6	Incidence	4868	Rajasthan	3	Both	27	Age-standardized	681	Caries of deciduous teeth	3	Rate	1990	2021	-20.9706	14.1992	-43.4875
377	6	Incidence	560	Oregon	3	Both	27	Age-standardized	681	Caries of deciduous teeth	3	Rate	1990	2021	11.602	25.3297	2.48805
378	6	Incidence	4724	East Java	3	Both	27	Age-standardized	681	Caries of deciduous teeth	3	Rate	1990	2021	-1.49598	6.32761	-9.76283
379	6	Incidence	4853	Himachal Pradesh	3	Both	27	Age-standardized	681	Caries of deciduous teeth	3	Rate	1990	2021	-22.9063	21.9453	-52.1829
380	6	Incidence	4734	Central Sulawesi	3	Both	27	Age-standardized	681	Caries of deciduous teeth	3	Rate	1990	2021	-0.794732	6.90428	-7.95806
381	6	Incidence	35434	Saitama	3	Both	27	Age-standardized	681	Caries of deciduous teeth	3	Rate	1990	2021	-7.31375	-0.373383	-14.1874
382	6	Incidence	4755	Cear谩	3	Both	27	Age-standardized	681	Caries of deciduous teeth	3	Rate	1990	2021	7.66224	28.1813	-2.36094
383	6	Incidence	4849	Delhi	3	Both	27	Age-standardized	681	Caries of deciduous teeth	3	Rate	1990	2021	-2.60976	5.37865	-9.71951
384	6	Incidence	35451	Hy艒go	3	Both	27	Age-standardized	681	Caries of deciduous teeth	3	Rate	1990	2021	-26.1336	23.1023	-54.5037
385	6	Incidence	4729	West Kalimantan	3	Both	27	Age-standardized	681	Caries of deciduous teeth	3	Rate	1990	2021	-2.64642	3.55434	-11.4854
386	6	Incidence	4739	Maluku	3	Both	27	Age-standardized	681	Caries of deciduous teeth	3	Rate	1990	2021	-1.98226	5.52199	-10.858
387	6	Incidence	4651	Mexico City	3	Both	27	Age-standardized	681	Caries of deciduous teeth	3	Rate	1990	2021	-16.2988	31.1505	-50.7752
388	6	Incidence	4765	Paran谩	3	Both	27	Age-standardized	681	Caries of deciduous teeth	3	Rate	1990	2021	7.21296	29.0982	-4.8974
389	6	Incidence	4656	Jalisco	3	Both	27	Age-standardized	681	Caries of deciduous teeth	3	Rate	1990	2021	4.74206	12.9596	-1.33507
390	6	Incidence	4712	Riau	3	Both	27	Age-standardized	681	Caries of deciduous teeth	3	Rate	1990	2021	-1.88397	4.97565	-10.3413
391	6	Incidence	35449	Ky艒to	3	Both	27	Age-standardized	681	Caries of deciduous teeth	3	Rate	1990	2021	-7.51199	1.20438	-15.4638
392	6	Incidence	35444	Gifu	3	Both	27	Age-standardized	681	Caries of deciduous teeth	3	Rate	1990	2021	-6.53405	6.48293	-20.2544
393	6	Incidence	35429	Yamagata	3	Both	27	Age-standardized	681	Caries of deciduous teeth	3	Rate	1990	2021	-25.861	20.6011	-55.2606
394	6	Incidence	4745		3	Both	27	Age-standardized	681	Caries of deciduous teeth	3	Rate	1990	2021	-20.7158	19.4164	-47.2877
395	6	Incidence	35427	Miyagi	3	Both	27	Age-standardized	681	Caries of deciduous teeth	3	Rate	1990	2021	-7.35851	1.0514	-16.0675
396	6	Incidence	4661	Nuevo Le贸n	3	Both	27	Age-standardized	681	Caries of deciduous teeth	3	Rate	1990	2021	4.49457	12.119	-2.31265
397	6	Incidence	4619	North West England	3	Both	27	Age-standardized	681	Caries of deciduous teeth	3	Rate	1990	2021	-30.6629	-8.90783	-46.0444
398	6	Incidence	4760	Minas Gerais	3	Both	27	Age-standardized	681	Caries of deciduous teeth	3	Rate	1990	2021	15.84	38.8656	4.23559
399	6	Incidence	4722	Central Java	3	Both	27	Age-standardized	681	Caries of deciduous teeth	3	Rate	1990	2021	-0.817778	6.31484	-7.79582
400	6	Incidence	541	Louisiana	3	Both	27	Age-standardized	681	Caries of deciduous teeth	3	Rate	1990	2021	16.2654	39.3978	6.87838
401	6	Incidence	4717	Bangka-Belitung Islands	3	Both	27	Age-standardized	681	Caries of deciduous teeth	3	Rate	1990	2021	-2.22596	3.05798	-8.5596
402	6	Incidence	4775	S茫o Paulo	3	Both	27	Age-standardized	681	Caries of deciduous teeth	3	Rate	1990	2021	15.2931	36.7483	0.298192
403	6	Incidence	4753	Amap谩	3	Both	27	Age-standardized	681	Caries of deciduous teeth	3	Rate	1990	2021	7.76409	31.0486	-4.90789
404	6	Incidence	4910	Oslo	3	Both	27	Age-standardized	681	Caries of deciduous teeth	3	Rate	1990	2021	2.70048	11.3626	-3.9043
405	6	Incidence	548	Missouri	3	Both	27	Age-standardized	681	Caries of deciduous teeth	3	Rate	1990	2021	11.9996	33.1266	2.18948
406	6	Incidence	563	South Carolina	3	Both	27	Age-standardized	681	Caries of deciduous teeth	3	Rate	1990	2021	11.1354	26.4681	1.93589
407	6	Incidence	4649	Chiapas	3	Both	27	Age-standardized	681	Caries of deciduous teeth	3	Rate	1990	2021	-17.8911	34.9254	-51.698
408	6	Incidence	35439	Toyama	3	Both	27	Age-standardized	681	Caries of deciduous teeth	3	Rate	1990	2021	-25.4705	23.3469	-55.192
409	6	Incidence	4624	Greater London	3	Both	27	Age-standardized	681	Caries of deciduous teeth	3	Rate	1990	2021	-33.9115	-17.8656	-48.64
410	6	Incidence	558	Ohio	3	Both	27	Age-standardized	681	Caries of deciduous teeth	3	Rate	1990	2021	11.6602	26.1434	2.42729
411	6	Incidence	4770	Rond么nia	3	Both	27	Age-standardized	681	Caries of deciduous teeth	3	Rate	1990	2021	8.05201	31.6227	-4.52269
412	6	Incidence	4727	West Nusa Tenggara	3	Both	27	Age-standardized	681	Caries of deciduous teeth	3	Rate	1990	2021	-0.775165	6.5203	-7.25491
413	6	Incidence	4732	East Kalimantan	3	Both	27	Age-standardized	681	Caries of deciduous teeth	3	Rate	1990	2021	-0.851112	5.79423	-7.57901
414	6	Incidence	4666	San Luis Potos铆	3	Both	27	Age-standardized	681	Caries of deciduous teeth	3	Rate	1990	2021	5.55808	16.6744	-0.714613
415	6	Incidence	35432	Tochigi	3	Both	27	Age-standardized	681	Caries of deciduous teeth	3	Rate	1990	2021	-5.99169	2.31481	-13.4699
416	6	Incidence	565	Tennessee	3	Both	27	Age-standardized	681	Caries of deciduous teeth	3	Rate	1990	2021	39.754	91.1159	13.4593
417	6	Incidence	35447	Mie	3	Both	27	Age-standardized	681	Caries of deciduous teeth	3	Rate	1990	2021	-17.1872	7.36424	-40.1538
418	6	Incidence	553	New Jersey	3	Both	27	Age-standardized	681	Caries of deciduous teeth	3	Rate	1990	2021	11.1669	25.5332	1.72606
419	6	Incidence	4844	Bihar	3	Both	27	Age-standardized	681	Caries of deciduous teeth	3	Rate	1990	2021	-3.21635	3.78863	-11.8527
420	6	Incidence	4873	Uttar Pradesh	3	Both	27	Age-standardized	681	Caries of deciduous teeth	3	Rate	1990	2021	-21.5022	16.0184	-44.8358
421	6	Incidence	4871	Telangana	3	Both	27	Age-standardized	681	Caries of deciduous teeth	3	Rate	1990	2021	-2.89283	2.63184	-9.38643
422	6	Incidence	4865	Odisha	3	Both	27	Age-standardized	681	Caries of deciduous teeth	3	Rate	1990	2021	-25.8788	17.9281	-55.2309
423	6	Incidence	4737	Gorontalo	3	Both	27	Age-standardized	681	Caries of deciduous teeth	3	Rate	1990	2021	-1.27862	6.12394	-7.86578
424	6	Incidence	4644	Baja California	3	Both	27	Age-standardized	681	Caries of deciduous teeth	3	Rate	1990	2021	-17.2157	33.0578	-50.036
425	6	Incidence	536	Illinois	3	Both	27	Age-standardized	681	Caries of deciduous teeth	3	Rate	1990	2021	-6.52604	62.5258	-46.3745
426	6	Incidence	568	Vermont	3	Both	27	Age-standardized	681	Caries of deciduous teeth	3	Rate	1990	2021	11.2531	26.0548	2.1198
427	6	Incidence	4852	Haryana	3	Both	27	Age-standardized	681	Caries of deciduous teeth	3	Rate	1990	2021	-21.9763	14.3051	-50.0823
428	6	Incidence	531	District of Columbia	3	Both	27	Age-standardized	681	Caries of deciduous teeth	3	Rate	1990	2021	11.9277	25.9645	2.13633
429	6	Incidence	4710	North Sumatra	3	Both	27	Age-standardized	681	Caries of deciduous teeth	3	Rate	1990	2021	-1.70231	5.19139	-8.95283
430	6	Incidence	4763	Par谩	3	Both	27	Age-standardized	681	Caries of deciduous teeth	3	Rate	1990	2021	6.37234	27.0903	-8.85763
431	6	Incidence	4768	Rio de Janeiro	3	Both	27	Age-standardized	681	Caries of deciduous teeth	3	Rate	1990	2021	8.29698	29.3476	-4.2915
432	6	Incidence	4671	Tlaxcala	3	Both	27	Age-standardized	681	Caries of deciduous teeth	3	Rate	1990	2021	4.14391	14.7916	-2.36311
433	6	Incidence	35437	Kanagawa	3	Both	27	Age-standardized	681	Caries of deciduous teeth	3	Rate	1990	2021	-6.66856	1.07526	-14.5199
434	6	Incidence	4654	Guerrero	3	Both	27	Age-standardized	681	Caries of deciduous teeth	3	Rate	1990	2021	4.36411	12.0741	-1.7748
435	6	Incidence	4664	Quer茅taro	3	Both	27	Age-standardized	681	Caries of deciduous teeth	3	Rate	1990	2021	2.87067	11.5037	-5.41198
436	6	Incidence	4944	Stockholm	3	Both	27	Age-standardized	681	Caries of deciduous teeth	3	Rate	1990	2021	1.09747	8.82016	-5.90284
437	6	Incidence	35435	Chiba	3	Both	27	Age-standardized	681	Caries of deciduous teeth	3	Rate	1990	2021	-25.8267	21.2932	-54.5271
438	6	Incidence	35425	Aomori	3	Both	27	Age-standardized	681	Caries of deciduous teeth	3	Rate	1990	2021	-7.71288	1.04517	-15.171
439	6	Incidence	4773	Santa Catarina	3	Both	27	Age-standardized	681	Caries of deciduous teeth	3	Rate	1990	2021	7.38961	30.5607	-3.8605
440	6	Incidence	4751	Alagoas	3	Both	27	Age-standardized	681	Caries of deciduous teeth	3	Rate	1990	2021	8.56471	30.3636	-4.20754
441	6	Incidence	4857	Kerala	3	Both	27	Age-standardized	681	Caries of deciduous teeth	3	Rate	1990	2021	-14.5716	10.0666	-30.6282
442	6	Incidence	35442	Yamanashi	3	Both	27	Age-standardized	681	Caries of deciduous teeth	3	Rate	1990	2021	-7.54124	0.292896	-17.078
443	6	Incidence	4720	Jakarta	3	Both	27	Age-standardized	681	Caries of deciduous teeth	3	Rate	1990	2021	-1.44073	6.11355	-9.06218
444	6	Incidence	4715	Bengkulu	3	Both	27	Age-standardized	681	Caries of deciduous teeth	3	Rate	1990	2021	-0.790559	6.18937	-7.11176
445	6	Incidence	4659	Morelos	3	Both	27	Age-standardized	681	Caries of deciduous teeth	3	Rate	1990	2021	4.72732	11.7258	-4.24344
446	6	Incidence	4742	Papua	3	Both	27	Age-standardized	681	Caries of deciduous teeth	3	Rate	1990	2021	-1.48771	5.57896	-9.3317
447	6	Incidence	573	Wyoming	3	Both	27	Age-standardized	681	Caries of deciduous teeth	3	Rate	1990	2021	11.9632	29.3233	1.6233
448	6	Incidence	4923	M酶re og Romsdal	3	Both	27	Age-standardized	681	Caries of deciduous teeth	3	Rate	1990	2021	3.54471	11.7665	-3.40218
449	6	Incidence	4863	Mizoram	3	Both	27	Age-standardized	681	Caries of deciduous teeth	3	Rate	1990	2021	-23.1518	16.6632	-51.9983
450	6	Incidence	4758	Goi谩s	3	Both	27	Age-standardized	681	Caries of deciduous teeth	3	Rate	1990	2021	7.82547	27.1453	-3.61299
451	6	Incidence	4842	Arunachal Pradesh	3	Both	27	Age-standardized	681	Caries of deciduous teeth	3	Rate	1990	2021	-3.91433	2.6209	-11.0366
452	6	Incidence	4869	Sikkim	3	Both	27	Age-standardized	681	Caries of deciduous teeth	3	Rate	1990	2021	-17.2746	11.1439	-35.6015
453	6	Incidence	4761	Mato Grosso do Sul	3	Both	27	Age-standardized	681	Caries of deciduous teeth	3	Rate	1990	2021	9.15441	32.5971	-2.39553
454	6	Incidence	4725	Banten	3	Both	27	Age-standardized	681	Caries of deciduous teeth	3	Rate	1990	2021	-0.991017	7.15398	-8.47863
455	6	Incidence	4766	Pernambuco	3	Both	27	Age-standardized	681	Caries of deciduous teeth	3	Rate	1990	2021	5.4515	24.3189	-8.25746
456	6	Incidence	35445	Shizuoka	3	Both	27	Age-standardized	681	Caries of deciduous teeth	3	Rate	1990	2021	-5.761	6.05139	-18.1728
457	6	Incidence	35452	Nara	3	Both	27	Age-standardized	681	Caries of deciduous teeth	3	Rate	1990	2021	-6.26674	2.98596	-14.7792
458	6	Incidence	4854	Jammu & Kashmir and Ladakh	3	Both	27	Age-standardized	681	Caries of deciduous teeth	3	Rate	1990	2021	-8.52776	3.18833	-17.1219
459	6	Incidence	4756	Distrito Federal	3	Both	27	Age-standardized	681	Caries of deciduous teeth	3	Rate	1990	2021	16.8267	43.3676	1.88892
460	6	Incidence	4850	Goa	3	Both	27	Age-standardized	681	Caries of deciduous teeth	3	Rate	1990	2021	-14.2349	7.00944	-33.4541
461	6	Incidence	35428	Akita	3	Both	27	Age-standardized	681	Caries of deciduous teeth	3	Rate	1990	2021	-25.4716	22.2939	-54.642
462	6	Incidence	35433	Gunma	3	Both	27	Age-standardized	681	Caries of deciduous teeth	3	Rate	1990	2021	-25.9136	22.1152	-55.2762
463	6	Incidence	4860	Maharashtra	3	Both	27	Age-standardized	681	Caries of deciduous teeth	3	Rate	1990	2021	-3.28296	4.6371	-10.4206
464	6	Incidence	4730	Central Kalimantan	3	Both	27	Age-standardized	681	Caries of deciduous teeth	3	Rate	1990	2021	-2.51844	4.52023	-10.7508
465	6	Incidence	4874	Uttarakhand	3	Both	27	Age-standardized	681	Caries of deciduous teeth	3	Rate	1990	2021	-9.09706	4.99794	-18.9995
466	6	Incidence	35448	Shiga	3	Both	27	Age-standardized	681	Caries of deciduous teeth	3	Rate	1990	2021	-7.00338	2.1437	-14.8296
467	6	Incidence	35450	艑saka	3	Both	27	Age-standardized	681	Caries of deciduous teeth	3	Rate	1990	2021	-5.32755	7.77469	-17.8625
468	6	Incidence	35440	Ishikawa	3	Both	27	Age-standardized	681	Caries of deciduous teeth	3	Rate	1990	2021	-24.9859	22.3661	-54.9299
469	6	Incidence	4867	Punjab	3	Both	27	Age-standardized	681	Caries of deciduous teeth	3	Rate	1990	2021	-26.2922	22.8625	-56.5986
470	6	Incidence	35438	Niigata	3	Both	27	Age-standardized	681	Caries of deciduous teeth	3	Rate	1990	2021	-7.50866	0.639814	-16.9908
471	6	Incidence	35430	Fukushima	3	Both	27	Age-standardized	681	Caries of deciduous teeth	3	Rate	1990	2021	-25.4511	22.8818	-55.0526
472	6	Incidence	35456	Okayama	3	Both	27	Age-standardized	681	Caries of deciduous teeth	3	Rate	1990	2021	-6.30849	4.76857	-19.127
473	6	Incidence	35461	Ehime	3	Both	27	Age-standardized	681	Caries of deciduous teeth	3	Rate	1990	2021	-5.85679	8.56688	-20.2514
474	6	Incidence	35426	Iwate	3	Both	27	Age-standardized	681	Caries of deciduous teeth	3	Rate	1990	2021	-7.22576	0.402958	-15.1384
475	6	Incidence	35454	Tottori	3	Both	27	Age-standardized	681	Caries of deciduous teeth	3	Rate	1990	2021	-6.0175	4.32884	-19.484
476	6	Incidence	35443	Nagano	3	Both	27	Age-standardized	681	Caries of deciduous teeth	3	Rate	1990	2021	-25.927	22.6187	-55.2212
477	6	Incidence	35436	T艒ky艒	3	Both	27	Age-standardized	681	Caries of deciduous teeth	3	Rate	1990	2021	-25.8325	21.804	-56.1136
478	6	Incidence	35466	Kumamoto	3	Both	27	Age-standardized	681	Caries of deciduous teeth	3	Rate	1990	2021	-5.34312	5.53591	-18.1566
479	6	Incidence	4926	Nordland	3	Both	27	Age-standardized	681	Caries of deciduous teeth	3	Rate	1990	2021	2.36139	9.1252	-4.24695
480	6	Incidence	35459	Tokushima	3	Both	27	Age-standardized	681	Caries of deciduous teeth	3	Rate	1990	2021	-8.34948	-0.721087	-17.1503
481	6	Incidence	35453	Wakayama	3	Both	27	Age-standardized	681	Caries of deciduous teeth	3	Rate	1990	2021	-25.576	21.4326	-54.1526
482	6	Incidence	4855	Jharkhand	3	Both	27	Age-standardized	681	Caries of deciduous teeth	3	Rate	1990	2021	-7.30428	2.9184	-15.1172
483	6	Incidence	35464	Saga	3	Both	27	Age-standardized	681	Caries of deciduous teeth	3	Rate	1990	2021	-25.6161	20.8151	-54.5307
484	6	Incidence	4861	Manipur	3	Both	27	Age-standardized	681	Caries of deciduous teeth	3	Rate	1990	2021	-21.9716	13.9786	-48.9787
485	6	Incidence	35469	Kagoshima	3	Both	27	Age-standardized	681	Caries of deciduous teeth	3	Rate	1990	2021	-6.37647	4.32638	-15.412
486	6	Incidence	35431	Ibaraki	3	Both	27	Age-standardized	681	Caries of deciduous teeth	3	Rate	1990	2021	-26.264	21.054	-55.7932
487	6	Incidence	35457	Hiroshima	3	Both	27	Age-standardized	681	Caries of deciduous teeth	3	Rate	1990	2021	-6.71576	0.0124595	-15.4848
488	6	Incidence	35462	K艒chi	3	Both	27	Age-standardized	681	Caries of deciduous teeth	3	Rate	1990	2021	-25.536	20.9827	-54.3196
489	6	Incidence	35455	Shimane	3	Both	27	Age-standardized	681	Caries of deciduous teeth	3	Rate	1990	2021	-25.7038	22.6599	-54.759
490	6	Incidence	35467	艑ita	3	Both	27	Age-standardized	681	Caries of deciduous teeth	3	Rate	1990	2021	-7.72097	2.445	-18.5406
491	6	Incidence	35460	Kagawa	3	Both	27	Age-standardized	681	Caries of deciduous teeth	3	Rate	1990	2021	-5.89619	6.84835	-19.1581
492	6	Incidence	35630	Kilifi	3	Both	27	Age-standardized	681	Caries of deciduous teeth	3	Rate	1990	2021	-1.13816	5.0309	-7.40095
493	6	Incidence	35470	Okinawa	3	Both	27	Age-standardized	681	Caries of deciduous teeth	3	Rate	1990	2021	-25.8709	20.9836	-54.7365
494	6	Incidence	35635	Kwale	3	Both	27	Age-standardized	681	Caries of deciduous teeth	3	Rate	1990	2021	-0.75664	5.76303	-7.714
495	6	Incidence	35465	Nagasaki	3	Both	27	Age-standardized	681	Caries of deciduous teeth	3	Rate	1990	2021	-24.2567	21.8125	-54.0292
496	6	Incidence	35640	Mandera	3	Both	27	Age-standardized	681	Caries of deciduous teeth	3	Rate	1990	2021	-2.50037	4.81609	-11.0598
497	6	Incidence	35618	Bomet	3	Both	27	Age-standardized	681	Caries of deciduous teeth	3	Rate	1990	2021	-1.27734	5.02829	-7.51783
498	6	Incidence	35623	Garissa	3	Both	27	Age-standardized	681	Caries of deciduous teeth	3	Rate	1990	2021	-17.5716	6.70126	-40.2938
499	6	Incidence	35458	Yamaguchi	3	Both	27	Age-standardized	681	Caries of deciduous teeth	3	Rate	1990	2021	-6.11926	6.01948	-18.7796
500	6	Incidence	35662	Wajir	3	Both	27	Age-standardized	681	Caries of deciduous teeth	3	Rate	1990	2021	-0.558706	6.2661	-5.90365
501	6	Incidence	35628	Kericho	3	Both	27	Age-standardized	681	Caries of deciduous teeth	3	Rate	1990	2021	-28.157	16.4986	-56.5661
502	6	Incidence	35633	Kisumu	3	Both	27	Age-standardized	681	Caries of deciduous teeth	3	Rate	1990	2021	0.114457	7.63271	-6.2922
503	6	Incidence	35463	Fukuoka	3	Both	27	Age-standardized	681	Caries of deciduous teeth	3	Rate	1990	2021	-6.79545	2.7864	-16.9935
504	6	Incidence	35645	Murang'a	3	Both	27	Age-standardized	681	Caries of deciduous teeth	3	Rate	1990	2021	-1.12424	5.73804	-7.29663
505	6	Incidence	35650	Nyamira	3	Both	27	Age-standardized	681	Caries of deciduous teeth	3	Rate	1990	2021	-0.993127	10.5102	-7.60125
506	6	Incidence	35660	Uasin Gishu	3	Both	27	Age-standardized	681	Caries of deciduous teeth	3	Rate	1990	2021	-0.0752071	7.33556	-7.13092
507	6	Incidence	35638	Machakos	3	Both	27	Age-standardized	681	Caries of deciduous teeth	3	Rate	1990	2021	-1.31984	5.08968	-9.0073
508	6	Incidence	35468	Miyazaki	3	Both	27	Age-standardized	681	Caries of deciduous teeth	3	Rate	1990	2021	-6.29722	5.71932	-20.1354
509	6	Incidence	35643	Migori	3	Both	27	Age-standardized	681	Caries of deciduous teeth	3	Rate	1990	2021	-1.06133	4.77039	-7.0246
510	6	Incidence	35621	Elgeyo-Marakwet	3	Both	27	Age-standardized	681	Caries of deciduous teeth	3	Rate	1990	2021	-0.522763	6.86858	-6.07639
511	6	Incidence	35655	Taita Taveta	3	Both	27	Age-standardized	681	Caries of deciduous teeth	3	Rate	1990	2021	-0.116514	7.49348	-6.73291
512	6	Incidence	35648	Nandi	3	Both	27	Age-standardized	681	Caries of deciduous teeth	3	Rate	1990	2021	-0.551654	5.89442	-5.47859
513	6	Incidence	35631	Kirinyaga	3	Both	27	Age-standardized	681	Caries of deciduous teeth	3	Rate	1990	2021	-1.19604	5.33359	-9.61128
514	6	Incidence	44536	Commonwealth Middle Income	3	Both	27	Age-standardized	681	Caries of deciduous teeth	3	Rate	1990	2021	-11.881	5.55661	-23.6798
515	6	Incidence	35617	Baringo	3	Both	27	Age-standardized	681	Caries of deciduous teeth	3	Rate	1990	2021	-1.58083	4.24908	-9.01264
516	6	Incidence	35636	Laikipia	3	Both	27	Age-standardized	681	Caries of deciduous teeth	3	Rate	1990	2021	0.431457	9.58333	-6.88166
517	6	Incidence	35626	Kajiado	3	Both	27	Age-standardized	681	Caries of deciduous teeth	3	Rate	1990	2021	-1.4208	5.32551	-6.93919
518	6	Incidence	44559	Africa	3	Both	27	Age-standardized	681	Caries of deciduous teeth	3	Rate	1990	2021	-12.8117	10.2531	-26.6476
519	6	Incidence	35619	Bungoma	3	Both	27	Age-standardized	681	Caries of deciduous teeth	3	Rate	1990	2021	-1.54224	4.94053	-8.41092
520	6	Incidence	35624	Homa Bay	3	Both	27	Age-standardized	681	Caries of deciduous teeth	3	Rate	1990	2021	-1.52861	5.68834	-8.96106
521	6	Incidence	35641	Marsabit	3	Both	27	Age-standardized	681	Caries of deciduous teeth	3	Rate	1990	2021	-1.03826	4.77617	-7.05214
522	6	Incidence	35653	Samburu	3	Both	27	Age-standardized	681	Caries of deciduous teeth	3	Rate	1990	2021	0.0845756	7.80419	-6.2525
523	6	Incidence	35634	Kitui	3	Both	27	Age-standardized	681	Caries of deciduous teeth	3	Rate	1990	2021	-1.15314	7.22798	-8.48338
524	6	Incidence	44534	Commonwealth	3	Both	27	Age-standardized	681	Caries of deciduous teeth	3	Rate	1990	2021	-10.9009	5.86068	-22.0172
525	6	Incidence	44564	Region of the Americas	3	Both	27	Age-standardized	681	Caries of deciduous teeth	3	Rate	1990	2021	2.03584	15.0282	-6.82393
526	6	Incidence	35658	Trans Nzoia	3	Both	27	Age-standardized	681	Caries of deciduous teeth	3	Rate	1990	2021	-1.91359	4.75498	-8.41324
527	6	Incidence	35663	West Pokot	3	Both	27	Age-standardized	681	Caries of deciduous teeth	3	Rate	1990	2021	-1.02006	6.27538	-7.15618
528	6	Incidence	44575	World Bank High Income	3	Both	27	Age-standardized	681	Caries of deciduous teeth	3	Rate	1990	2021	-3.76405	1.78889	-8.18917
529	6	Incidence	44635	High SDI	3	Both	27	Age-standardized	681	Caries of deciduous teeth	3	Rate	1990	2021	1.14118	8.35663	-4.38733
530	6	Incidence	44644	Northumberland	3	Both	27	Age-standardized	681	Caries of deciduous teeth	3	Rate	1990	2021	-40.9832	-20.3512	-60.701
531	6	Incidence	35629	Kiambu	3	Both	27	Age-standardized	681	Caries of deciduous teeth	3	Rate	1990	2021	-22.2553	27.7615	-55.3303
532	6	Incidence	35651	Nyandarua	3	Both	27	Age-standardized	681	Caries of deciduous teeth	3	Rate	1990	2021	-0.824253	6.17765	-6.9894
533	6	Incidence	35646	Nairobi	3	Both	27	Age-standardized	681	Caries of deciduous teeth	3	Rate	1990	2021	0.094343	20.6073	-11.7248
534	6	Incidence	44642	Nordic Region	3	Both	27	Age-standardized	681	Caries of deciduous teeth	3	Rate	1990	2021	5.21521	12.9233	-2.45199
535	6	Incidence	44562	Europe	3	Both	27	Age-standardized	681	Caries of deciduous teeth	3	Rate	1990	2021	-6.96677	-2.90175	-11.7083
536	6	Incidence	44567	Eastern Mediterranean Region	3	Both	27	Age-standardized	681	Caries of deciduous teeth	3	Rate	1990	2021	-18.7819	13.9295	-41.0858
537	6	Incidence	44649	County Durham	3	Both	27	Age-standardized	681	Caries of deciduous teeth	3	Rate	1990	2021	-27.2231	30.7823	-58.893
538	6	Incidence	35661	Vihiga	3	Both	27	Age-standardized	681	Caries of deciduous teeth	3	Rate	1990	2021	-1.80525	6.04765	-9.81041
539	6	Incidence	44586	G20	3	Both	27	Age-standardized	681	Caries of deciduous teeth	3	Rate	1990	2021	-4.60459	4.92636	-11.5462
540	6	Incidence	44654	Hartlepool	3	Both	27	Age-standardized	681	Caries of deciduous teeth	3	Rate	1990	2021	-35.6997	18.2828	-64.3952
541	6	Incidence	35622	Embu	3	Both	27	Age-standardized	681	Caries of deciduous teeth	3	Rate	1990	2021	-1.67394	7.56612	-6.89705
542	6	Incidence	35639	Makueni	3	Both	27	Age-standardized	681	Caries of deciduous teeth	3	Rate	1990	2021	-0.88059	5.45452	-8.68847
543	6	Incidence	35656	Tana River	3	Both	27	Age-standardized	681	Caries of deciduous teeth	3	Rate	1990	2021	0.113668	10.7152	-5.40169
544	6	Incidence	35644	Mombasa	3	Both	27	Age-standardized	681	Caries of deciduous teeth	3	Rate	1990	2021	-1.48422	4.25228	-7.92324
545	6	Incidence	44647	North Tyneside	3	Both	27	Age-standardized	681	Caries of deciduous teeth	3	Rate	1990	2021	-34.9963	18.4188	-63.6152
546	6	Incidence	35632	Kisii	3	Both	27	Age-standardized	681	Caries of deciduous teeth	3	Rate	1990	2021	-0.339444	7.09989	-6.50298
547	6	Incidence	44659	Sefton	3	Both	27	Age-standardized	681	Caries of deciduous teeth	3	Rate	1990	2021	-35.7421	12.4098	-62.6837
548	6	Incidence	44591	World Bank Income Levels	3	Both	27	Age-standardized	681	Caries of deciduous teeth	3	Rate	1990	2021	-7.82313	6.2343	-17.3778
549	6	Incidence	35627	Kakamega	3	Both	27	Age-standardized	681	Caries of deciduous teeth	3	Rate	1990	2021	-28.4977	15.7143	-55.6933
550	6	Incidence	44537	Commonwealth Low Income	3	Both	27	Age-standardized	681	Caries of deciduous teeth	3	Rate	1990	2021	-7.77449	8.52803	-18.0825
551	6	Incidence	35649	Narok	3	Both	27	Age-standardized	681	Caries of deciduous teeth	3	Rate	1990	2021	-0.848741	6.75378	-8.50832
552	6	Incidence	35637	Lamu	3	Both	27	Age-standardized	681	Caries of deciduous teeth	3	Rate	1990	2021	-1.38372	6.74061	-9.12063
553	6	Incidence	35659	Turkana	3	Both	27	Age-standardized	681	Caries of deciduous teeth	3	Rate	1990	2021	-1.03772	6.99283	-7.79119
554	6	Incidence	44638	North America	3	Both	27	Age-standardized	681	Caries of deciduous teeth	3	Rate	1990	2021	10.883	31.6051	-0.924501
555	6	Incidence	44669	Wigan	3	Both	27	Age-standardized	681	Caries of deciduous teeth	3	Rate	1990	2021	-21.0231	-8.07987	-38.0921
556	6	Incidence	44664	Bury	3	Both	27	Age-standardized	681	Caries of deciduous teeth	3	Rate	1990	2021	-36.8304	12.0185	-64.1576
557	6	Incidence	44652	South Tyneside	3	Both	27	Age-standardized	681	Caries of deciduous teeth	3	Rate	1990	2021	-30.4782	-12.3632	-47.7565
558	6	Incidence	44578	World Bank Low Income	3	Both	27	Age-standardized	681	Caries of deciduous teeth	3	Rate	1990	2021	-18.0654	6.37447	-32.7697
559	6	Incidence	44657	Trafford	3	Both	27	Age-standardized	681	Caries of deciduous teeth	3	Rate	1990	2021	-35.6625	-18.3193	-55.9121
560	6	Incidence	35625	Isiolo	3	Both	27	Age-standardized	681	Caries of deciduous teeth	3	Rate	1990	2021	-0.512306	6.85093	-7.43472
561	6	Incidence	44560	America	3	Both	27	Age-standardized	681	Caries of deciduous teeth	3	Rate	1990	2021	2.03584	15.0282	-6.82393
562	6	Incidence	35642	Meru	3	Both	27	Age-standardized	681	Caries of deciduous teeth	3	Rate	1990	2021	-28.4995	14.2562	-56.988
563	6	Incidence	44676	Blackpool	3	Both	27	Age-standardized	681	Caries of deciduous teeth	3	Rate	1990	2021	-26.6559	31.7485	-59.4256
564	6	Incidence	35620	Busia	3	Both	27	Age-standardized	681	Caries of deciduous teeth	3	Rate	1990	2021	-28.3342	14.1951	-55.3517
565	6	Incidence	44565	South-East Asia Region	3	Both	27	Age-standardized	681	Caries of deciduous teeth	3	Rate	1990	2021	-9.66624	3.84373	-18.9666
566	6	Incidence	35647	Nakuru	3	Both	27	Age-standardized	681	Caries of deciduous teeth	3	Rate	1990	2021	-1.06312	10.1308	-7.69889
567	6	Incidence	44535	Commonwealth High Income	3	Both	27	Age-standardized	681	Caries of deciduous teeth	3	Rate	1990	2021	-2.47165	8.40975	-13.6383
568	6	Incidence	35654	Siaya	3	Both	27	Age-standardized	681	Caries of deciduous teeth	3	Rate	1990	2021	0.251538	6.70268	-5.54825
569	6	Incidence	44645	Stockton-on-Tees	3	Both	27	Age-standardized	681	Caries of deciduous teeth	3	Rate	1990	2021	-34.3416	15.4121	-63.7897
570	6	Incidence	44662	Bolton	3	Both	27	Age-standardized	681	Caries of deciduous teeth	3	Rate	1990	2021	-30.9025	21.607	-61.3748
571	6	Incidence	44636	Low-middle SDI	3	Both	27	Age-standardized	681	Caries of deciduous teeth	3	Rate	1990	2021	-12.7301	10.1874	-27.4723
572	6	Incidence	44686	Leeds	3	Both	27	Age-standardized	681	Caries of deciduous teeth	3	Rate	1990	2021	-37.529	-17.2803	-57.7668
573	6	Incidence	44576	World Bank Upper Middle Income	3	Both	27	Age-standardized	681	Caries of deciduous teeth	3	Rate	1990	2021	-0.0628135	8.96229	-6.43088
574	6	Incidence	44691	Kingston upon Hull, City of	3	Both	27	Age-standardized	681	Caries of deciduous teeth	3	Rate	1990	2021	-28.9617	-11.3054	-49.3692
575	6	Incidence	44563	African Region	3	Both	27	Age-standardized	681	Caries of deciduous teeth	3	Rate	1990	2021	-12.0148	6.12473	-22.7282
576	6	Incidence	44696	Rutland	3	Both	27	Age-standardized	681	Caries of deciduous teeth	3	Rate	1990	2021	-34.3008	18.2162	-63.3062
577	6	Incidence	44650	Gateshead	3	Both	27	Age-standardized	681	Caries of deciduous teeth	3	Rate	1990	2021	-35.2672	16.6736	-63.1408
578	6	Incidence	44672	Tameside	3	Both	27	Age-standardized	681	Caries of deciduous teeth	3	Rate	1990	2021	-33.2547	21.1861	-62.2645
579	6	Incidence	44681	North East Lincolnshire	3	Both	27	Age-standardized	681	Caries of deciduous teeth	3	Rate	1990	2021	-34.6611	19.7726	-63.3054
580	6	Incidence	35652	Nyeri	3	Both	27	Age-standardized	681	Caries of deciduous teeth	3	Rate	1990	2021	-0.767741	6.43607	-7.44272
581	6	Incidence	44643	Darlington	3	Both	27	Age-standardized	681	Caries of deciduous teeth	3	Rate	1990	2021	-27.5634	30.5586	-60.2634
582	6	Incidence	44708	Dudley	3	Both	27	Age-standardized	681	Caries of deciduous teeth	3	Rate	1990	2021	-34.4458	17.655	-61.637
583	6	Incidence	44684	Bradford	3	Both	27	Age-standardized	681	Caries of deciduous teeth	3	Rate	1990	2021	-33.6099	-17.2983	-51.8563
584	6	Incidence	44568	Western Pacific Region	3	Both	27	Age-standardized	681	Caries of deciduous teeth	3	Rate	1990	2021	0.977291	7.98728	-4.74847
585	6	Incidence	44587	African Union	3	Both	27	Age-standardized	681	Caries of deciduous teeth	3	Rate	1990	2021	-12.8117	10.2531	-26.6476
586	6	Incidence	44667	Oldham	3	Both	27	Age-standardized	681	Caries of deciduous teeth	3	Rate	1990	2021	-21.6029	-7.04027	-40.9188
587	6	Incidence	44655	Cheshire East	3	Both	27	Age-standardized	681	Caries of deciduous teeth	3	Rate	1990	2021	-41.1906	-16.0939	-63.5373
588	6	Incidence	44713	Wolverhampton	3	Both	27	Age-standardized	681	Caries of deciduous teeth	3	Rate	1990	2021	-34.6308	16.5883	-63.2922
589	6	Incidence	44701	Leicester	3	Both	27	Age-standardized	681	Caries of deciduous teeth	3	Rate	1990	2021	-37.3647	11.7628	-65.2909
590	6	Incidence	44538	Other Union Territories	3	Both	27	Age-standardized	681	Caries of deciduous teeth	3	Rate	1990	2021	-2.73498	6.42095	-9.92133
591	6	Incidence	44674	Blackburn with Darwen	3	Both	27	Age-standardized	681	Caries of deciduous teeth	3	Rate	1990	2021	-10.7279	3.24404	-24.7885
592	6	Incidence	35657	Tharaka Nithi	3	Both	27	Age-standardized	681	Caries of deciduous teeth	3	Rate	1990	2021	-1.381	4.7141	-8.10872
593	6	Incidence	44660	Lancashire	3	Both	27	Age-standardized	681	Caries of deciduous teeth	3	Rate	1990	2021	-29.8759	30.0925	-60.4686
594	6	Incidence	44648	Redcar and Cleveland	3	Both	27	Age-standardized	681	Caries of deciduous teeth	3	Rate	1990	2021	-33.4969	-12.0676	-55.5801
595	6	Incidence	44634	High-middle SDI	3	Both	27	Age-standardized	681	Caries of deciduous teeth	3	Rate	1990	2021	-2.28256	2.62021	-5.75597
596	6	Incidence	44718	Suffolk	3	Both	27	Age-standardized	681	Caries of deciduous teeth	3	Rate	1990	2021	-45.5795	-20.9358	-65.4106
597	6	Incidence	44711	Stoke-on-Trent	3	Both	27	Age-standardized	681	Caries of deciduous teeth	3	Rate	1990	2021	-30.3071	28.8823	-61.531
598	6	Incidence	44584	OECD Countries	3	Both	27	Age-standardized	681	Caries of deciduous teeth	3	Rate	1990	2021	-1.23322	7.5938	-7.59555
599	6	Incidence	44706	Worcestershire	3	Both	27	Age-standardized	681	Caries of deciduous teeth	3	Rate	1990	2021	-42.4126	-20.5554	-63.0637
600	6	Incidence	44716	Bedford	3	Both	27	Age-standardized	681	Caries of deciduous teeth	3	Rate	1990	2021	-38.949	-20.5274	-57.2991
601	6	Incidence	44639	Middle SDI	3	Both	27	Age-standardized	681	Caries of deciduous teeth	3	Rate	1990	2021	-3.63514	5.69437	-10.4702
602	6	Incidence	44679	East Riding of Yorkshire	3	Both	27	Age-standardized	681	Caries of deciduous teeth	3	Rate	1990	2021	-36.931	-14.6373	-56.8793
603	6	Incidence	44740	Harrow	3	Both	27	Age-standardized	681	Caries of deciduous teeth	3	Rate	1990	2021	-34.6824	17.8291	-64.4264
604	6	Incidence	44665	St Helens	3	Both	27	Age-standardized	681	Caries of deciduous teeth	3	Rate	1990	2021	-31.9059	23.3827	-62.2377
605	6	Incidence	44670	Halton	3	Both	27	Age-standardized	681	Caries of deciduous teeth	3	Rate	1990	2021	-34.9332	-16.7565	-56.6492
606	6	Incidence	44653	Sunderland	3	Both	27	Age-standardized	681	Caries of deciduous teeth	3	Rate	1990	2021	-30.5062	26.9365	-62.2267
607	6	Incidence	44694	Leicestershire	3	Both	27	Age-standardized	681	Caries of deciduous teeth	3	Rate	1990	2021	-37.1411	-16.6483	-57.1223
608	6	Incidence	44658	Cheshire West and Chester	3	Both	27	Age-standardized	681	Caries of deciduous teeth	3	Rate	1990	2021	-35.0641	16.2664	-63.8558
609	6	Incidence	44677	Manchester	3	Both	27	Age-standardized	681	Caries of deciduous teeth	3	Rate	1990	2021	-31.7827	-11.8291	-53.7164
610	6	Incidence	44723	Norfolk	3	Both	27	Age-standardized	681	Caries of deciduous teeth	3	Rate	1990	2021	-39.392	8.02998	-66.694
611	6	Incidence	44745	Greenwich	3	Both	27	Age-standardized	681	Caries of deciduous teeth	3	Rate	1990	2021	-14.4527	-2.77635	-32.1983
612	6	Incidence	44561	Asia	3	Both	27	Age-standardized	681	Caries of deciduous teeth	3	Rate	1990	2021	-6.90279	5.74809	-15.7317
613	6	Incidence	44566	European Region	3	Both	27	Age-standardized	681	Caries of deciduous teeth	3	Rate	1990	2021	-5.39538	-1.885	-9.70792
614	6	Incidence	44646	Newcastle upon Tyne	3	Both	27	Age-standardized	681	Caries of deciduous teeth	3	Rate	1990	2021	-41.1493	-18.9017	-64.5621
615	6	Incidence	44637	Low SDI	3	Both	27	Age-standardized	681	Caries of deciduous teeth	3	Rate	1990	2021	-13.8577	4.46061	-25.8344
616	6	Incidence	44663	Wirral	3	Both	27	Age-standardized	681	Caries of deciduous teeth	3	Rate	1990	2021	-37.0731	-18.3456	-54.7021
617	6	Incidence	44728	Kensington and Chelsea	3	Both	27	Age-standardized	681	Caries of deciduous teeth	3	Rate	1990	2021	-38.9988	-19.6996	-60.3785
618	6	Incidence	44577	World Bank Lower Middle Income	3	Both	27	Age-standardized	681	Caries of deciduous teeth	3	Rate	1990	2021	-10.4996	5.73858	-21.643
619	6	Incidence	44692	Barnsley	3	Both	27	Age-standardized	681	Caries of deciduous teeth	3	Rate	1990	2021	-32.5112	-14.7724	-54.5189
620	6	Incidence	44738	Kingston upon Thames	3	Both	27	Age-standardized	681	Caries of deciduous teeth	3	Rate	1990	2021	-33.5083	22.3853	-63.8663
621	6	Incidence	44682	Calderdale	3	Both	27	Age-standardized	681	Caries of deciduous teeth	3	Rate	1990	2021	-33.7182	17.5186	-63.5666
622	6	Incidence	44697	Derby	3	Both	27	Age-standardized	681	Caries of deciduous teeth	3	Rate	1990	2021	-40.6571	-19.046	-60.5545
623	6	Incidence	44704	Solihull	3	Both	27	Age-standardized	681	Caries of deciduous teeth	3	Rate	1990	2021	-33.5445	16.3063	-60.6875
624	6	Incidence	44687	Sheffield	3	Both	27	Age-standardized	681	Caries of deciduous teeth	3	Rate	1990	2021	-30.362	-14.0562	-49.9214
625	6	Incidence	44709	Coventry	3	Both	27	Age-standardized	681	Caries of deciduous teeth	3	Rate	1990	2021	-34.4797	19.4513	-62.3142
626	6	Incidence	44651	Middlesbrough	3	Both	27	Age-standardized	681	Caries of deciduous teeth	3	Rate	1990	2021	-33.2111	18.1856	-63.3618
627	6	Incidence	44721	Cambridgeshire	3	Both	27	Age-standardized	681	Caries of deciduous teeth	3	Rate	1990	2021	-37.5502	16.7472	-66.9155
628	6	Incidence	44685	Kirklees	3	Both	27	Age-standardized	681	Caries of deciduous teeth	3	Rate	1990	2021	-34.002	17.3117	-63.1321
629	6	Incidence	44743	Hammersmith and Fulham	3	Both	27	Age-standardized	681	Caries of deciduous teeth	3	Rate	1990	2021	-30.7147	29.0851	-62.6603
630	6	Incidence	44714	Birmingham	3	Both	27	Age-standardized	681	Caries of deciduous teeth	3	Rate	1990	2021	-33.2484	23.6307	-62.2555
631	6	Incidence	44726	Luton	3	Both	27	Age-standardized	681	Caries of deciduous teeth	3	Rate	1990	2021	-30.9736	21.5886	-61.6304
632	6	Incidence	44673	Salford	3	Both	27	Age-standardized	681	Caries of deciduous teeth	3	Rate	1990	2021	-13.4868	-1.82134	-28.3391
633	6	Incidence	44689	Rotherham	3	Both	27	Age-standardized	681	Caries of deciduous teeth	3	Rate	1990	2021	-33.9345	-16.6921	-53.3798
634	6	Incidence	44590	Four World Regions	3	Both	27	Age-standardized	681	Caries of deciduous teeth	3	Rate	1990	2021	-7.81849	6.23169	-17.3686
635	6	Incidence	44733	Redbridge	3	Both	27	Age-standardized	681	Caries of deciduous teeth	3	Rate	1990	2021	-33.3826	22.1497	-62.6198
636	6	Incidence	44656	Stockport	3	Both	27	Age-standardized	681	Caries of deciduous teeth	3	Rate	1990	2021	-37.815	-14.1495	-59.8745
637	6	Incidence	44772	East Sussex	3	Both	27	Age-standardized	681	Caries of deciduous teeth	3	Rate	1990	2021	-17.3433	-4.69843	-35.459
638	6	Incidence	44755	Haringey	3	Both	27	Age-standardized	681	Caries of deciduous teeth	3	Rate	1990	2021	-36.6335	-16.5899	-55.1757
639	6	Incidence	44750	Lewisham	3	Both	27	Age-standardized	681	Caries of deciduous teeth	3	Rate	1990	2021	-43.6035	-21.6658	-63.35
640	6	Incidence	44736	Hillingdon	3	Both	27	Age-standardized	681	Caries of deciduous teeth	3	Rate	1990	2021	-35.6813	-14.5388	-59.2758
641	6	Incidence	44668	Rochdale	3	Both	27	Age-standardized	681	Caries of deciduous teeth	3	Rate	1990	2021	-18.0089	-4.21437	-35.7725
642	6	Incidence	44699	Nottinghamshire	3	Both	27	Age-standardized	681	Caries of deciduous teeth	3	Rate	1990	2021	-29.8128	27.1363	-62.1147
643	6	Incidence	44777	Slough	3	Both	27	Age-standardized	681	Caries of deciduous teeth	3	Rate	1990	2021	-33.7461	-15.5088	-53.8245
644	6	Incidence	44765	Bracknell Forest	3	Both	27	Age-standardized	681	Caries of deciduous teeth	3	Rate	1990	2021	-39.4048	-15.9428	-62.7476
645	6	Incidence	44702	Warwickshire	3	Both	27	Age-standardized	681	Caries of deciduous teeth	3	Rate	1990	2021	-30.3578	30.4051	-62.4574
646	6	Incidence	44731	Bromley	3	Both	27	Age-standardized	681	Caries of deciduous teeth	3	Rate	1990	2021	-38.5667	11.607	-65.7519
647	6	Incidence	44719	Hertfordshire	3	Both	27	Age-standardized	681	Caries of deciduous teeth	3	Rate	1990	2021	-36.7266	17.2399	-64.8384
648	6	Incidence	44661	Cumbria	3	Both	27	Age-standardized	681	Caries of deciduous teeth	3	Rate	1990	2021	-31.3724	25.3429	-61.5514
649	6	Incidence	44707	Staffordshire	3	Both	27	Age-standardized	681	Caries of deciduous teeth	3	Rate	1990	2021	-34.4055	21.2581	-63.4153
650	6	Incidence	44748	Camden	3	Both	27	Age-standardized	681	Caries of deciduous teeth	3	Rate	1990	2021	-39.413	-15.5781	-61.4303
651	6	Incidence	44717	Central Bedfordshire	3	Both	27	Age-standardized	681	Caries of deciduous teeth	3	Rate	1990	2021	-47.1737	-22.4673	-67.7122
652	6	Incidence	44775	Milton Keynes	3	Both	27	Age-standardized	681	Caries of deciduous teeth	3	Rate	1990	2021	-42.6195	-21.0576	-62.3857
653	6	Incidence	44678	North Yorkshire	3	Both	27	Age-standardized	681	Caries of deciduous teeth	3	Rate	1990	2021	-35.5083	14.6557	-62.9208
654	6	Incidence	44861	Addis Ababa	3	Both	27	Age-standardized	681	Caries of deciduous teeth	3	Rate	1990	2021	-0.684566	5.36626	-7.42062
655	6	Incidence	44758	Tower Hamlets	3	Both	27	Age-standardized	681	Caries of deciduous teeth	3	Rate	1990	2021	-32.5227	-15.5333	-54.4693
656	6	Incidence	44666	Warrington	3	Both	27	Age-standardized	681	Caries of deciduous teeth	3	Rate	1990	2021	-40.7575	-21.5189	-60.9167
657	6	Incidence	44741	Enfield	3	Both	27	Age-standardized	681	Caries of deciduous teeth	3	Rate	1990	2021	-35.0971	17.8589	-64.2142
658	6	Incidence	44867	West Azarbayejan	3	Both	27	Age-standardized	681	Caries of deciduous teeth	3	Rate	1990	2021	-0.640378	5.03603	-7.61233
659	6	Incidence	44671	Liverpool	3	Both	27	Age-standardized	681	Caries of deciduous teeth	3	Rate	1990	2021	-33.1544	-15.6233	-50.0424
660	6	Incidence	44712	Walsall	3	Both	27	Age-standardized	681	Caries of deciduous teeth	3	Rate	1990	2021	-34.6907	17.9469	-62.8809
661	6	Incidence	44724	Southend-on-Sea	3	Both	27	Age-standardized	681	Caries of deciduous teeth	3	Rate	1990	2021	-37.3529	14.4745	-66.8688
662	6	Incidence	44695	Lincolnshire	3	Both	27	Age-standardized	681	Caries of deciduous teeth	3	Rate	1990	2021	-29.2002	32.3139	-62.6783
663	6	Incidence	44753	Newham	3	Both	27	Age-standardized	681	Caries of deciduous teeth	3	Rate	1990	2021	-28.6275	-9.52162	-52.0068
664	6	Incidence	44792	Plymouth	3	Both	27	Age-standardized	681	Caries of deciduous teeth	3	Rate	1990	2021	-44.2688	-21.5223	-66.4804
665	6	Incidence	44770	Brighton and Hove	3	Both	27	Age-standardized	681	Caries of deciduous teeth	3	Rate	1990	2021	-21.895	-5.46225	-45.8436
666	6	Incidence	44763	West Berkshire	3	Both	27	Age-standardized	681	Caries of deciduous teeth	3	Rate	1990	2021	-43.513	-24.287	-64.2638
667	6	Incidence	44787	Swindon	3	Both	27	Age-standardized	681	Caries of deciduous teeth	3	Rate	1990	2021	-30.0974	-13.3884	-48.9067
668	6	Incidence	44746	Wandsworth	3	Both	27	Age-standardized	681	Caries of deciduous teeth	3	Rate	1990	2021	-41.7998	-22.4411	-60.7585
669	6	Incidence	44683	North Lincolnshire	3	Both	27	Age-standardized	681	Caries of deciduous teeth	3	Rate	1990	2021	-35.6419	18.0117	-63.4855
670	6	Incidence	44859	Harari	3	Both	27	Age-standardized	681	Caries of deciduous teeth	3	Rate	1990	2021	-0.625686	5.09365	-7.9048
671	6	Incidence	44693	Northamptonshire	3	Both	27	Age-standardized	681	Caries of deciduous teeth	3	Rate	1990	2021	-37.635	-16.679	-57.7212
672	6	Incidence	44739	Sutton	3	Both	27	Age-standardized	681	Caries of deciduous teeth	3	Rate	1990	2021	-42.5511	-21.0785	-63.4583
673	6	Incidence	44729	Barnet	3	Both	27	Age-standardized	681	Caries of deciduous teeth	3	Rate	1990	2021	-33.6267	20.6797	-62.865
674	6	Incidence	44688	Wakefield	3	Both	27	Age-standardized	681	Caries of deciduous teeth	3	Rate	1990	2021	-34.1372	17.0418	-63.1774
675	6	Incidence	44698	Derbyshire	3	Both	27	Age-standardized	681	Caries of deciduous teeth	3	Rate	1990	2021	-39.3134	8.31809	-66.003
676	6	Incidence	44872	Golestan	3	Both	27	Age-standardized	681	Caries of deciduous teeth	3	Rate	1990	2021	-2.0126	6.08305	-10.8677
677	6	Incidence	44782	Devon	3	Both	27	Age-standardized	681	Caries of deciduous teeth	3	Rate	1990	2021	-18.6676	-3.67203	-40.8655
678	6	Incidence	44854	Amhara	3	Both	27	Age-standardized	681	Caries of deciduous teeth	3	Rate	1990	2021	-0.397076	6.70242	-6.83551
679	6	Incidence	44710	Telford and Wrekin	3	Both	27	Age-standardized	681	Caries of deciduous teeth	3	Rate	1990	2021	-33.2011	20.5753	-62.8772
680	6	Incidence	44727	Richmond upon Thames	3	Both	27	Age-standardized	681	Caries of deciduous teeth	3	Rate	1990	2021	-43.4877	-17.9837	-65.1786
681	6	Incidence	44705	Shropshire	3	Both	27	Age-standardized	681	Caries of deciduous teeth	3	Rate	1990	2021	-41.3227	-19.3564	-60.2203
682	6	Incidence	44744	Ealing	3	Both	27	Age-standardized	681	Caries of deciduous teeth	3	Rate	1990	2021	-19.0483	-6.3617	-34.508
683	6	Incidence	44760	Buckinghamshire	3	Both	27	Age-standardized	681	Caries of deciduous teeth	3	Rate	1990	2021	-41.9528	-21.2152	-59.6309
684	6	Incidence	44715	Sandwell	3	Both	27	Age-standardized	681	Caries of deciduous teeth	3	Rate	1990	2021	-42.1676	-18.8871	-62.031
685	6	Incidence	44722	Thurrock	3	Both	27	Age-standardized	681	Caries of deciduous teeth	3	Rate	1990	2021	-35.5482	19.8137	-66.1922
686	6	Incidence	44780	Wiltshire	3	Both	27	Age-standardized	681	Caries of deciduous teeth	3	Rate	1990	2021	-38.035	-16.4015	-60.8519
687	6	Incidence	44734	Merton	3	Both	27	Age-standardized	681	Caries of deciduous teeth	3	Rate	1990	2021	-39.9185	-16.8804	-61.9185
688	6	Incidence	44768	Reading	3	Both	27	Age-standardized	681	Caries of deciduous teeth	3	Rate	1990	2021	-37.3671	-14.6693	-57.2784
689	6	Incidence	44865	Ardebil	3	Both	27	Age-standardized	681	Caries of deciduous teeth	3	Rate	1990	2021	-1.33535	5.92597	-8.28221
690	6	Incidence	44870	Fars	3	Both	27	Age-standardized	681	Caries of deciduous teeth	3	Rate	1990	2021	-0.910238	8.45849	-9.03119
691	6	Incidence	44773	Portsmouth	3	Both	27	Age-standardized	681	Caries of deciduous teeth	3	Rate	1990	2021	-41.2575	-16.381	-66.0127
692	6	Incidence	44785	Gloucestershire	3	Both	27	Age-standardized	681	Caries of deciduous teeth	3	Rate	1990	2021	-38.0986	-14.3957	-62.1383
693	6	Incidence	44790	Bournemouth	3	Both	27	Age-standardized	681	Caries of deciduous teeth	3	Rate	1990	2021	-41.3097	-18.9744	-61.8733
694	6	Incidence	44852	Tigray	3	Both	27	Age-standardized	681	Caries of deciduous teeth	3	Rate	1990	2021	-0.334187	5.80353	-6.32839
695	6	Incidence	44737	Havering	3	Both	27	Age-standardized	681	Caries of deciduous teeth	3	Rate	1990	2021	-42.0837	-18.0531	-63.7
696	6	Incidence	44703	Herefordshire, County of	3	Both	27	Age-standardized	681	Caries of deciduous teeth	3	Rate	1990	2021	-31.1681	24.967	-61.674
697	6	Incidence	44766	West Sussex	3	Both	27	Age-standardized	681	Caries of deciduous teeth	3	Rate	1990	2021	-20.2443	-5.70551	-42.7725
698	6	Incidence	44778	South Gloucestershire	3	Both	27	Age-standardized	681	Caries of deciduous teeth	3	Rate	1990	2021	-47.8257	-25.8981	-66.7562
699	6	Incidence	44751	Hounslow	3	Both	27	Age-standardized	681	Caries of deciduous teeth	3	Rate	1990	2021	-37.877	-17.2157	-59.1015
700	6	Incidence	44675	Knowsley	3	Both	27	Age-standardized	681	Caries of deciduous teeth	3	Rate	1990	2021	-30.5649	28.8493	-62.2726
701	6	Incidence	44894	Zanjan	3	Both	27	Age-standardized	681	Caries of deciduous teeth	3	Rate	1990	2021	-0.941445	8.8926	-10.394
702	6	Incidence	44887	Mazandaran	3	Both	27	Age-standardized	681	Caries of deciduous teeth	3	Rate	1990	2021	-0.936501	6.50824	-10.462
703	6	Incidence	44732	Bexley	3	Both	27	Age-standardized	681	Caries of deciduous teeth	3	Rate	1990	2021	-27.7455	33.4833	-61.0497
704	6	Incidence	44882	Khuzestan	3	Both	27	Age-standardized	681	Caries of deciduous teeth	3	Rate	1990	2021	0.938624	10.3796	-8.27233
705	6	Incidence	44756	Hackney	3	Both	27	Age-standardized	681	Caries of deciduous teeth	3	Rate	1990	2021	-15.3497	-3.86359	-36.3405
706	6	Incidence	44877	Kerman	3	Both	27	Age-standardized	681	Caries of deciduous teeth	3	Rate	1990	2021	-20.7694	23.6893	-53.032
707	6	Incidence	44776	Southampton	3	Both	27	Age-standardized	681	Caries of deciduous teeth	3	Rate	1990	2021	-26.7952	-10.4899	-43.8286
708	6	Incidence	44862	Dire Dawa	3	Both	27	Age-standardized	681	Caries of deciduous teeth	3	Rate	1990	2021	-0.720071	5.02501	-8.17024
709	6	Incidence	44749	Lambeth	3	Both	27	Age-standardized	681	Caries of deciduous teeth	3	Rate	1990	2021	-43.045	-19.0933	-65.1629
710	6	Incidence	44680	York	3	Both	27	Age-standardized	681	Caries of deciduous teeth	3	Rate	1990	2021	-43.0207	-17.4229	-66.1817
711	6	Incidence	44892	Tehran	3	Both	27	Age-standardized	681	Caries of deciduous teeth	3	Rate	1990	2021	-0.845367	6.52047	-7.95799
712	6	Incidence	44742	Croydon	3	Both	27	Age-standardized	681	Caries of deciduous teeth	3	Rate	1990	2021	-37.5601	13.4189	-65.3853
713	6	Incidence	44771	Medway	3	Both	27	Age-standardized	681	Caries of deciduous teeth	3	Rate	1990	2021	-44.702	-23.3121	-63.1602
714	6	Incidence	44754	Barking and Dagenham	3	Both	27	Age-standardized	681	Caries of deciduous teeth	3	Rate	1990	2021	-37.968	-17.862	-58.3709
715	6	Incidence	44720	Essex	3	Both	27	Age-standardized	681	Caries of deciduous teeth	3	Rate	1990	2021	-20.9946	-4.10802	-43.6436
716	6	Incidence	44747	Waltham Forest	3	Both	27	Age-standardized	681	Caries of deciduous teeth	3	Rate	1990	2021	-13.7822	-3.60828	-30.6922
717	6	Incidence	44857	Benishangul-Gumuz	3	Both	27	Age-standardized	681	Caries of deciduous teeth	3	Rate	1990	2021	0.338916	7.73124	-6.82371
718	6	Incidence	44725	Peterborough	3	Both	27	Age-standardized	681	Caries of deciduous teeth	3	Rate	1990	2021	-29.9269	-13.4684	-46.7407
719	6	Incidence	44885	Lorestan	3	Both	27	Age-standardized	681	Caries of deciduous teeth	3	Rate	1990	2021	-1.07665	4.69781	-8.45553
720	6	Incidence	44788	Torbay	3	Both	27	Age-standardized	681	Caries of deciduous teeth	3	Rate	1990	2021	-40.9974	-20.1472	-61.2348
721	6	Incidence	44759	Wokingham	3	Both	27	Age-standardized	681	Caries of deciduous teeth	3	Rate	1990	2021	-45.3844	-17.4651	-68.6106
722	6	Incidence	44764	Hampshire	3	Both	27	Age-standardized	681	Caries of deciduous teeth	3	Rate	1990	2021	-20.7045	-4.2882	-44.2684
723	6	Incidence	44875	Ilam	3	Both	27	Age-standardized	681	Caries of deciduous teeth	3	Rate	1990	2021	-0.385123	5.57115	-8.71605
724	6	Incidence	44873	Hamadan	3	Both	27	Age-standardized	681	Caries of deciduous teeth	3	Rate	1990	2021	-21.4423	22.5942	-52.4258
725	6	Incidence	44880	Khorasan-e-Razavi	3	Both	27	Age-standardized	681	Caries of deciduous teeth	3	Rate	1990	2021	-1.36637	5.14224	-9.20355
726	6	Incidence	44855	Oromia	3	Both	27	Age-standardized	681	Caries of deciduous teeth	3	Rate	1990	2021	-0.246579	6.4697	-7.34019
727	6	Incidence	44868	Bushehr	3	Both	27	Age-standardized	681	Caries of deciduous teeth	3	Rate	1990	2021	-1.23915	5.64827	-8.87804
728	6	Incidence	44860	Gambella	3	Both	27	Age-standardized	681	Caries of deciduous teeth	3	Rate	1990	2021	-0.788142	5.63163	-6.10279
729	6	Incidence	53620	Punjab	3	Both	27	Age-standardized	681	Caries of deciduous teeth	3	Rate	1990	2021	-27.1057	18.7361	-57.5137
730	6	Incidence	44700	Nottingham	3	Both	27	Age-standardized	681	Caries of deciduous teeth	3	Rate	1990	2021	-29.5993	24.4979	-60.8372
731	6	Incidence	44783	Poole	3	Both	27	Age-standardized	681	Caries of deciduous teeth	3	Rate	1990	2021	-40.8642	-16.1927	-62.5556
732	6	Incidence	44730	Westminster	3	Both	27	Age-standardized	681	Caries of deciduous teeth	3	Rate	1990	2021	-37.0106	-16.1931	-56.6445
733	6	Incidence	44690	Doncaster	3	Both	27	Age-standardized	681	Caries of deciduous teeth	3	Rate	1990	2021	-32.5105	20.1793	-62.5
734	6	Incidence	53615	Azad Jammu & Kashmir	3	Both	27	Age-standardized	681	Caries of deciduous teeth	3	Rate	1990	2021	-0.55792	7.1971	-7.85819
735	6	Incidence	44774	Isle of Wight	3	Both	27	Age-standardized	681	Caries of deciduous teeth	3	Rate	1990	2021	-42.8677	-21.5306	-63.2716
736	6	Incidence	44735	Brent	3	Both	27	Age-standardized	681	Caries of deciduous teeth	3	Rate	1990	2021	-38.4386	6.01673	-66.3508
737	6	Incidence	94365	Central Africa	3	Both	27	Age-standardized	681	Caries of deciduous teeth	3	Rate	1990	2021	-21.2923	11.0532	-39.2421
738	6	Incidence	44871	Gilan	3	Both	27	Age-standardized	681	Caries of deciduous teeth	3	Rate	1990	2021	-20.9929	24.8808	-52.5378
739	6	Incidence	44769	Kent	3	Both	27	Age-standardized	681	Caries of deciduous teeth	3	Rate	1990	2021	-46.3192	-23.2582	-68.58
740	6	Incidence	44791	Cornwall	3	Both	27	Age-standardized	681	Caries of deciduous teeth	3	Rate	1990	2021	-19.9287	-7.03757	-40.1441
741	6	Incidence	53432	Tr酶ndelag	3	Both	27	Age-standardized	681	Caries of deciduous teeth	3	Rate	1990	2021	3.56434	12.6027	-4.20015
742	6	Incidence	60136	Viken	3	Both	27	Age-standardized	681	Caries of deciduous teeth	3	Rate	1990	2021	3.53815	13.0412	-3.50654
743	6	Incidence	44786	Somerset	3	Both	27	Age-standardized	681	Caries of deciduous teeth	3	Rate	1990	2021	-41.1708	-18.8555	-62.7749
744	6	Incidence	44893	Yazd	3	Both	27	Age-standardized	681	Caries of deciduous teeth	3	Rate	1990	2021	-1.1052	5.94318	-9.22394
745	6	Incidence	44878	Kermanshah	3	Both	27	Age-standardized	681	Caries of deciduous teeth	3	Rate	1990	2021	-1.3108	7.41284	-8.6133
746	6	Incidence	44853	Afar	3	Both	27	Age-standardized	681	Caries of deciduous teeth	3	Rate	1990	2021	0.279998	8.21911	-5.05747
747	6	Incidence	44767	Oxfordshire	3	Both	27	Age-standardized	681	Caries of deciduous teeth	3	Rate	1990	2021	-40.6571	-19.0462	-62.1537
748	6	Incidence	53618	Islamabad Capital Territory	3	Both	27	Age-standardized	681	Caries of deciduous teeth	3	Rate	1990	2021	-28.0806	11.0657	-57.0881
749	6	Incidence	44866	East Azarbayejan	3	Both	27	Age-standardized	681	Caries of deciduous teeth	3	Rate	1990	2021	0.0677414	8.05531	-8.49209
750	6	Incidence	44752	Southwark	3	Both	27	Age-standardized	681	Caries of deciduous teeth	3	Rate	1990	2021	-41.4833	-17.9299	-65.068
751	6	Incidence	95467	Advanced Health System	3	Both	27	Age-standardized	681	Caries of deciduous teeth	3	Rate	1990	2021	-3.52213	0.893101	-7.00187
752	6	Incidence	95469	Limited Health System	3	Both	27	Age-standardized	681	Caries of deciduous teeth	3	Rate	1990	2021	-11.3589	5.49956	-22.6627
753	6	Incidence	44781	North Somerset	3	Both	27	Age-standardized	681	Caries of deciduous teeth	3	Rate	1990	2021	-38.3221	-12.8911	-59.1392
754	6	Incidence	44883	Kohgiluyeh and Boyer-Ahmad	3	Both	27	Age-standardized	681	Caries of deciduous teeth	3	Rate	1990	2021	-1.76728	5.04908	-11.3281
755	6	Incidence	44888	Qazvin	3	Both	27	Age-standardized	681	Caries of deciduous teeth	3	Rate	1990	2021	-0.825778	5.80094	-7.73365
756	6	Incidence	44864	Alborz	3	Both	27	Age-standardized	681	Caries of deciduous teeth	3	Rate	1990	2021	-1.68892	4.82902	-10.6101
757	6	Incidence	44779	Dorset	3	Both	27	Age-standardized	681	Caries of deciduous teeth	3	Rate	1990	2021	-41.3915	-19.5895	-61.5906
758	6	Incidence	94216	Association of Southeast Asian Nations	3	Both	27	Age-standardized	681	Caries of deciduous teeth	3	Rate	1990	2021	0.68334	3.86699	-2.30219
759	6	Incidence	44876	Isfahan	3	Both	27	Age-standardized	681	Caries of deciduous teeth	3	Rate	1990	2021	-0.552336	6.26424	-8.51551
760	6	Incidence	44757	Islington	3	Both	27	Age-standardized	681	Caries of deciduous teeth	3	Rate	1990	2021	-14.3023	-3.42749	-33.3171
761	6	Incidence	44789	Bristol, City of	3	Both	27	Age-standardized	681	Caries of deciduous teeth	3	Rate	1990	2021	-38.9016	-16.6352	-59.975
762	6	Incidence	44890	Semnan	3	Both	27	Age-standardized	681	Caries of deciduous teeth	3	Rate	1990	2021	-1.90451	6.32529	-11.4499
763	6	Incidence	95081	Brazil South	3	Both	27	Age-standardized	681	Caries of deciduous teeth	3	Rate	1990	2021	13.7079	36.847	1.27937
764	6	Incidence	95471	Health System Grouping Levels	3	Both	27	Age-standardized	681	Caries of deciduous teeth	3	Rate	1990	2021	-7.82314	6.23428	-17.3778
765	6	Incidence	44858	Southern Nations, Nationalities, and Peoples	3	Both	27	Age-standardized	681	Caries of deciduous teeth	3	Rate	1990	2021	-0.473615	5.08896	-8.39347
766	6	Incidence	60134	Vestfold og Telemark	3	Both	27	Age-standardized	681	Caries of deciduous teeth	3	Rate	1990	2021	3.83615	13.328	-2.7779
767	6	Incidence	95468	Basic Health System	3	Both	27	Age-standardized	681	Caries of deciduous teeth	3	Rate	1990	2021	-2.15238	8.77208	-9.63647
768	6	Incidence	44856	Somali	3	Both	27	Age-standardized	681	Caries of deciduous teeth	3	Rate	1990	2021	-1.02099	6.07209	-10.1921
769	6	Incidence	44874	Hormozgan	3	Both	27	Age-standardized	681	Caries of deciduous teeth	3	Rate	1990	2021	-1.14949	5.52247	-10.8818
770	6	Incidence	44761	Surrey	3	Both	27	Age-standardized	681	Caries of deciduous teeth	3	Rate	1990	2021	-20.4049	-3.22841	-41.4756
771	6	Incidence	95082	Brazil Southeast	3	Both	27	Age-standardized	681	Caries of deciduous teeth	3	Rate	1990	2021	13.873	30.0391	4.31402
772	6	Incidence	95470	Minimal Health System	3	Both	27	Age-standardized	681	Caries of deciduous teeth	3	Rate	1990	2021	-24.811	6.31737	-43.1941
773	6	Incidence	44881	South Khorasan	3	Both	27	Age-standardized	681	Caries of deciduous teeth	3	Rate	1990	2021	0.0284918	6.55041	-6.03686
774	6	Incidence	44886	Markazi	3	Both	27	Age-standardized	681	Caries of deciduous teeth	3	Rate	1990	2021	-1.44455	5.62782	-7.53585
775	6	Incidence	53621	Sindh	3	Both	27	Age-standardized	681	Caries of deciduous teeth	3	Rate	1990	2021	-0.868705	6.21781	-6.9767
776	6	Incidence	60132	Vestland	3	Both	27	Age-standardized	681	Caries of deciduous teeth	3	Rate	1990	2021	4.12324	13.9875	-2.68207
777	6	Incidence	44869	Chahar Mahaal and Bakhtiari	3	Both	27	Age-standardized	681	Caries of deciduous teeth	3	Rate	1990	2021	-0.977464	7.99657	-9.49171
778	6	Incidence	44784	Bath and North East Somerset	3	Both	27	Age-standardized	681	Caries of deciduous teeth	3	Rate	1990	2021	-19.8461	-4.66612	-43.2184
779	6	Incidence	44879	North Khorasan	3	Both	27	Age-standardized	681	Caries of deciduous teeth	3	Rate	1990	2021	-1.36347	4.80286	-10.2552
780	6	Incidence	60137	Troms og Finnmark	3	Both	27	Age-standardized	681	Caries of deciduous teeth	3	Rate	1990	2021	3.52956	13.7117	-2.97096
781	6	Incidence	53616	Balochistan	3	Both	27	Age-standardized	681	Caries of deciduous teeth	3	Rate	1990	2021	-1.26233	6.71443	-8.55835
782	6	Incidence	94366	Sahel Region	3	Both	27	Age-standardized	681	Caries of deciduous teeth	3	Rate	1990	2021	-10.1038	7.4859	-21.0755
783	6	Incidence	44884	Kurdistan	3	Both	27	Age-standardized	681	Caries of deciduous teeth	3	Rate	1990	2021	-2.56458	3.59019	-8.53923
784	6	Incidence	53619	Khyber Pakhtunkhwa	3	Both	27	Age-standardized	681	Caries of deciduous teeth	3	Rate	1990	2021	-27.7568	14.8787	-57.2341
785	6	Incidence	44889	Qom	3	Both	27	Age-standardized	681	Caries of deciduous teeth	3	Rate	1990	2021	-1.08211	6.09039	-8.08438
786	6	Incidence	95079	Brazil Northeast	3	Both	27	Age-standardized	681	Caries of deciduous teeth	3	Rate	1990	2021	6.05723	22.5505	-1.92877
787	6	Incidence	94217	Gulf Cooperation Council	3	Both	27	Age-standardized	681	Caries of deciduous teeth	3	Rate	1990	2021	-30.3451	-15.3494	-42.8319
788	6	Incidence	60135	Innlandet	3	Both	27	Age-standardized	681	Caries of deciduous teeth	3	Rate	1990	2021	2.76394	13.6457	-3.71391
789	6	Incidence	53617	Gilgit-Baltistan	3	Both	27	Age-standardized	681	Caries of deciduous teeth	3	Rate	1990	2021	-27.6599	13.6053	-57.4065
790	6	Incidence	95078	Brazil North	3	Both	27	Age-standardized	681	Caries of deciduous teeth	3	Rate	1990	2021	7.20578	27.4171	-4.29951
791	6	Incidence	60133	Agder	3	Both	27	Age-standardized	681	Caries of deciduous teeth	3	Rate	1990	2021	2.97985	13.4185	-3.81771
792	6	Incidence	44762	Windsor and Maidenhead	3	Both	27	Age-standardized	681	Caries of deciduous teeth	3	Rate	1990	2021	-43.1755	-21.0528	-64.5674
793	6	Incidence	94215	Organization of Islamic Cooperation	3	Both	27	Age-standardized	681	Caries of deciduous teeth	3	Rate	1990	2021	-11.7273	5.99056	-23.5115
794	6	Incidence	44891	Sistan and Baluchistan	3	Both	27	Age-standardized	681	Caries of deciduous teeth	3	Rate	1990	2021	-0.0670675	8.5604	-6.26972
795	6	Incidence	95080	Brazil Central-West	3	Both	27	Age-standardized	681	Caries of deciduous teeth	3	Rate	1990	2021	9.26306	29.874	-0.680737
