# Supplementary material for: Global, Regional, and National Levels and Trends in Burden of Dental Caries and Periodontal Disease from 1990 to 2035：Result From the Global Burden of Disease Study 2021
Source: Research Square preprint supplement (doi:10.21203/rs.3.rs-5609270/v1), 2025-04-02
Supplement: Supplementary file 3 [file 0c09640cfa279db15bca86f9.xlsx]

## Sheet: Sheet1
Exported data
	measure_name	location_name	sex_name	age_name	cause_name	metric_name	year	val	upper	lower
1	Prevalence	Central Asia	Both	20-24 years	Caries of permanent teeth	Rate	1990	47725.6	61960.7	33473.9
2	Prevalence	Central Asia	Both	20-24 years	Caries of permanent teeth	Rate	2021	46430.3	60620.5	32954.3
3	Prevalence	Southeast Asia	Both	20-24 years	Caries of permanent teeth	Rate	1990	39323.4	51910.3	28704.8
4	Prevalence	Southeast Asia	Both	20-24 years	Caries of permanent teeth	Rate	2021	37270.4	48810.6	27747.9
5	Prevalence	Oceania	Both	20-24 years	Caries of permanent teeth	Rate	1990	52214.2	65983	36741.6
6	Prevalence	Oceania	Both	20-24 years	Caries of permanent teeth	Rate	2021	51740.1	66051.7	36768.7
7	Prevalence	East Asia	Both	20-24 years	Caries of permanent teeth	Rate	1990	37366.5	53347	24056.2
8	Prevalence	East Asia	Both	20-24 years	Caries of permanent teeth	Rate	2021	33359.1	44015.4	24428.7
9	Prevalence	Global	Both	20-24 years	Caries of permanent teeth	Rate	1990	39397	51505.1	28281.7
10	Prevalence	Global	Both	20-24 years	Caries of permanent teeth	Rate	2021	38039.9	48896.9	28656.5
11	Prevalence	High-income Asia Pacific	Both	20-24 years	Caries of permanent teeth	Rate	1990	30765.5	39424.3	24013
12	Prevalence	High-income Asia Pacific	Both	20-24 years	Caries of permanent teeth	Rate	2021	28303	35325.9	22884.5
13	Prevalence	Central Europe	Both	20-24 years	Caries of permanent teeth	Rate	1990	51750.7	63591.2	38641.7
14	Prevalence	Central Europe	Both	20-24 years	Caries of permanent teeth	Rate	2021	47420.2	59829.9	35247.8
15	Prevalence	Western Europe	Both	20-24 years	Caries of permanent teeth	Rate	1990	39133.9	51737.7	28883.2
16	Prevalence	Western Europe	Both	20-24 years	Caries of permanent teeth	Rate	2021	36864.9	45701	28798.5
17	Prevalence	Eastern Europe	Both	20-24 years	Caries of permanent teeth	Rate	1990	39646.8	51882.2	29269
18	Prevalence	Eastern Europe	Both	20-24 years	Caries of permanent teeth	Rate	2021	38687.8	50271.7	28741.8
19	Prevalence	Australasia	Both	20-24 years	Caries of permanent teeth	Rate	1990	43091.1	54429	31933
20	Prevalence	Australasia	Both	20-24 years	Caries of permanent teeth	Rate	2021	36426	49103.7	26371.5
21	Prevalence	Southern Latin America	Both	20-24 years	Caries of permanent teeth	Rate	1990	45369.9	59813.1	32543.6
22	Prevalence	Southern Latin America	Both	20-24 years	Caries of permanent teeth	Rate	2021	45545.4	56027.2	35438
23	Prevalence	Caribbean	Both	20-24 years	Caries of permanent teeth	Rate	1990	48345.7	62187.4	34923.6
24	Prevalence	Caribbean	Both	20-24 years	Caries of permanent teeth	Rate	2021	44756	54491.3	35725.4
25	Prevalence	High-income North America	Both	20-24 years	Caries of permanent teeth	Rate	1990	31011.4	40789.3	23665.8
26	Prevalence	High-income North America	Both	20-24 years	Caries of permanent teeth	Rate	2021	30303.6	38805.8	23729.2
27	Prevalence	Central Latin America	Both	20-24 years	Caries of permanent teeth	Rate	1990	39174.7	51673.7	28515.8
28	Prevalence	Central Latin America	Both	20-24 years	Caries of permanent teeth	Rate	2021	37760.6	49345.3	28059.1
29	Prevalence	North Africa and Middle East	Both	20-24 years	Caries of permanent teeth	Rate	1990	44948	57872.3	32717.4
30	Prevalence	North Africa and Middle East	Both	20-24 years	Caries of permanent teeth	Rate	2021	43156.9	56017	31322.7
31	Prevalence	Tropical Latin America	Both	20-24 years	Caries of permanent teeth	Rate	1990	39777.7	52821	28722
32	Prevalence	Tropical Latin America	Both	20-24 years	Caries of permanent teeth	Rate	2021	38654.8	50937.7	28649.5
33	Prevalence	South Asia	Both	20-24 years	Caries of permanent teeth	Rate	1990	40023.3	52313.8	29633.1
34	Prevalence	South Asia	Both	20-24 years	Caries of permanent teeth	Rate	2021	38233.3	49580.4	28852.5
35	Prevalence	Eastern Sub-Saharan Africa	Both	20-24 years	Caries of permanent teeth	Rate	1990	44088.2	54337.1	33894.1
36	Prevalence	Eastern Sub-Saharan Africa	Both	20-24 years	Caries of permanent teeth	Rate	2021	41329.4	51355.3	32227.3
37	Prevalence	Southern Sub-Saharan Africa	Both	20-24 years	Caries of permanent teeth	Rate	1990	37967.8	49776.7	27459.3
38	Prevalence	Southern Sub-Saharan Africa	Both	20-24 years	Caries of permanent teeth	Rate	2021	36607.3	47822.7	26875.8
39	Prevalence	Central Sub-Saharan Africa	Both	20-24 years	Caries of permanent teeth	Rate	1990	42999.4	56587.9	30545
40	Prevalence	Central Sub-Saharan Africa	Both	20-24 years	Caries of permanent teeth	Rate	2021	43213.3	57188.6	30138.8
41	Prevalence	Western Sub-Saharan Africa	Both	20-24 years	Caries of permanent teeth	Rate	1990	38714.5	49231.8	29299.7
42	Prevalence	Western Sub-Saharan Africa	Both	20-24 years	Caries of permanent teeth	Rate	2021	36989.5	46453.1	28451.5
43	Prevalence	Central Asia	Both	5-9 years	Caries of permanent teeth	Rate	1990	12585.5	22494.1	5720.38
44	Prevalence	Central Asia	Both	5-9 years	Caries of permanent teeth	Rate	2021	12256.7	21453.1	5452.23
45	Prevalence	Central Asia	Both	10-14 years	Caries of permanent teeth	Rate	1990	32680.3	45441.7	20609.5
46	Prevalence	Central Asia	Both	10-14 years	Caries of permanent teeth	Rate	2021	31342.9	43580.6	19493.4
47	Prevalence	Central Asia	Both	15-19 years	Caries of permanent teeth	Rate	1990	38738	53821.8	24505.2
48	Prevalence	Central Asia	Both	15-19 years	Caries of permanent teeth	Rate	2021	37268.6	52388.7	23499.4
49	Prevalence	Central Asia	Both	25-29 years	Caries of permanent teeth	Rate	1990	50249.6	68476.5	33750.9
50	Prevalence	Central Asia	Both	25-29 years	Caries of permanent teeth	Rate	2021	49181	67551.8	33545.9
51	Prevalence	Central Asia	Both	30-34 years	Caries of permanent teeth	Rate	1990	49210	65907.9	34792.9
52	Prevalence	Central Asia	Both	30-34 years	Caries of permanent teeth	Rate	2021	48409.3	65382.5	33974
53	Prevalence	Central Asia	Both	35-39 years	Caries of permanent teeth	Rate	1990	49707.3	65484	32084.7
54	Prevalence	Central Asia	Both	35-39 years	Caries of permanent teeth	Rate	2021	49107.6	65310	32104.9
55	Prevalence	Central Asia	Both	40-44 years	Caries of permanent teeth	Rate	1990	49404.7	64364.1	33742.2
56	Prevalence	Central Asia	Both	40-44 years	Caries of permanent teeth	Rate	2021	48988	62856.2	33374.8
57	Prevalence	Central Asia	Both	45-49 years	Caries of permanent teeth	Rate	1990	48431	62962.2	32912.7
58	Prevalence	Central Asia	Both	45-49 years	Caries of permanent teeth	Rate	2021	48216.8	62100.4	32672.2
59	Prevalence	Central Asia	Both	50-54 years	Caries of permanent teeth	Rate	1990	47088.9	63463.7	29376.9
60	Prevalence	Central Asia	Both	50-54 years	Caries of permanent teeth	Rate	2021	47142.5	63657.2	29396.1
61	Prevalence	Central Asia	Both	55-59 years	Caries of permanent teeth	Rate	1990	45646.5	62026.8	30164.9
62	Prevalence	Central Asia	Both	55-59 years	Caries of permanent teeth	Rate	2021	45521.3	62249.5	30424.1
63	Prevalence	Central Asia	Both	60-64 years	Caries of permanent teeth	Rate	1990	44068	59052	32159.2
64	Prevalence	Central Asia	Both	60-64 years	Caries of permanent teeth	Rate	2021	43836.6	58831.2	32106.4
65	Prevalence	Central Asia	Both	65-69 years	Caries of permanent teeth	Rate	1990	42347.4	53962.8	30296.3
66	Prevalence	Central Asia	Both	65-69 years	Caries of permanent teeth	Rate	2021	41956.5	54346.6	29974
67	Prevalence	Central Asia	Both	70+ years	Caries of permanent teeth	Rate	1990	34260.8	43690.8	25477.6
68	Prevalence	Central Asia	Both	70+ years	Caries of permanent teeth	Rate	2021	34095.1	43574.2	25143
69	Prevalence	Southeast Asia	Both	65-69 years	Caries of permanent teeth	Rate	2021	39086.1	49728.3	29142.5
70	Prevalence	Southeast Asia	Both	70+ years	Caries of permanent teeth	Rate	1990	38893.6	47921.6	28947.5
71	Prevalence	Southeast Asia	Both	70+ years	Caries of permanent teeth	Rate	2021	36287.6	44588.7	27327
72	Prevalence	High-income North America	Both	65-69 years	Caries of permanent teeth	Rate	2021	20946.4	27810.3	14840.1
73	Prevalence	High-income North America	Both	70+ years	Caries of permanent teeth	Rate	1990	18750	25192.9	13131.1
74	Prevalence	High-income North America	Both	70+ years	Caries of permanent teeth	Rate	2021	18703.5	24077.7	13769.8
75	Prevalence	Central Sub-Saharan Africa	Both	5-9 years	Caries of permanent teeth	Rate	1990	6345.54	12585.6	2459.94
76	Prevalence	Central Sub-Saharan Africa	Both	5-9 years	Caries of permanent teeth	Rate	2021	6430.11	12547.3	2559.94
77	Prevalence	Central Sub-Saharan Africa	Both	10-14 years	Caries of permanent teeth	Rate	1990	22673.7	37731.9	12530
78	Prevalence	Central Sub-Saharan Africa	Both	10-14 years	Caries of permanent teeth	Rate	2021	22815	36940.9	12871.6
79	Prevalence	Central Sub-Saharan Africa	Both	15-19 years	Caries of permanent teeth	Rate	1990	33389.1	48296.2	21505.6
80	Prevalence	Central Sub-Saharan Africa	Both	15-19 years	Caries of permanent teeth	Rate	2021	33544.4	48497.4	21216.1
81	Prevalence	Central Sub-Saharan Africa	Both	25-29 years	Caries of permanent teeth	Rate	1990	44379.9	63824.6	29409.9
82	Prevalence	Central Sub-Saharan Africa	Both	25-29 years	Caries of permanent teeth	Rate	2021	44742.6	63933.7	30128
83	Prevalence	Central Sub-Saharan Africa	Both	30-34 years	Caries of permanent teeth	Rate	1990	42692.7	59763	28870.7
84	Prevalence	Central Sub-Saharan Africa	Both	30-34 years	Caries of permanent teeth	Rate	2021	43259.3	61035.7	28971.8
85	Prevalence	Central Sub-Saharan Africa	Both	35-39 years	Caries of permanent teeth	Rate	1990	43967.2	60112.6	26388.5
86	Prevalence	Central Sub-Saharan Africa	Both	35-39 years	Caries of permanent teeth	Rate	2021	44659.5	60652.5	26661.5
87	Prevalence	Central Sub-Saharan Africa	Both	40-44 years	Caries of permanent teeth	Rate	1990	44248.7	60269.6	26627.8
88	Prevalence	Central Sub-Saharan Africa	Both	40-44 years	Caries of permanent teeth	Rate	2021	44844.4	61466.3	26877
89	Prevalence	Central Sub-Saharan Africa	Both	45-49 years	Caries of permanent teeth	Rate	1990	42828.4	57382.4	28177.3
90	Prevalence	Central Sub-Saharan Africa	Both	45-49 years	Caries of permanent teeth	Rate	2021	43656.1	58409.5	28961.6
91	Prevalence	Central Sub-Saharan Africa	Both	50-54 years	Caries of permanent teeth	Rate	1990	41110.6	56861.9	25598.4
92	Prevalence	Central Sub-Saharan Africa	Both	50-54 years	Caries of permanent teeth	Rate	2021	42019.5	57922.9	26290
93	Prevalence	Central Sub-Saharan Africa	Both	55-59 years	Caries of permanent teeth	Rate	1990	39663	55223.8	26175.5
94	Prevalence	Central Sub-Saharan Africa	Both	55-59 years	Caries of permanent teeth	Rate	2021	40529	56528.3	27376.6
95	Prevalence	Central Sub-Saharan Africa	Both	60-64 years	Caries of permanent teeth	Rate	1990	38897.2	52981.4	26858.8
96	Prevalence	Central Sub-Saharan Africa	Both	60-64 years	Caries of permanent teeth	Rate	2021	39779	54099.1	28246.2
97	Prevalence	Central Sub-Saharan Africa	Both	65-69 years	Caries of permanent teeth	Rate	1990	38560.9	50042.4	27614.6
98	Prevalence	Eastern Sub-Saharan Africa	Both	5-9 years	Caries of permanent teeth	Rate	1990	11273.6	17230.3	7062.22
99	Prevalence	Eastern Sub-Saharan Africa	Both	5-9 years	Caries of permanent teeth	Rate	2021	10439.4	16975.5	5635
100	Prevalence	Eastern Sub-Saharan Africa	Both	10-14 years	Caries of permanent teeth	Rate	1990	28990.9	38095.9	20894.7
101	Prevalence	Eastern Sub-Saharan Africa	Both	10-14 years	Caries of permanent teeth	Rate	2021	27087.5	37039.9	17862.4
102	Prevalence	Eastern Sub-Saharan Africa	Both	15-19 years	Caries of permanent teeth	Rate	1990	35371.9	45820.1	25950.1
103	Prevalence	Eastern Sub-Saharan Africa	Both	15-19 years	Caries of permanent teeth	Rate	2021	32393.7	43172.3	23462.7
104	Prevalence	Eastern Sub-Saharan Africa	Both	25-29 years	Caries of permanent teeth	Rate	1990	44670.4	58596.6	33195.5
105	Prevalence	Eastern Sub-Saharan Africa	Both	25-29 years	Caries of permanent teeth	Rate	2021	42195.6	55801	31132.5
106	Prevalence	Eastern Sub-Saharan Africa	Both	30-34 years	Caries of permanent teeth	Rate	1990	44028.1	56461.7	34032.9
107	Prevalence	Eastern Sub-Saharan Africa	Both	30-34 years	Caries of permanent teeth	Rate	2021	41064	53481.6	31106.1
108	Prevalence	Eastern Sub-Saharan Africa	Both	35-39 years	Caries of permanent teeth	Rate	1990	46266.6	58243.7	33269.4
109	Prevalence	Eastern Sub-Saharan Africa	Both	35-39 years	Caries of permanent teeth	Rate	2021	43233.6	55431.7	30471.3
110	Prevalence	Eastern Sub-Saharan Africa	Both	40-44 years	Caries of permanent teeth	Rate	1990	46797.2	58527.8	34514.8
111	Prevalence	Eastern Sub-Saharan Africa	Both	40-44 years	Caries of permanent teeth	Rate	2021	43605.2	55192.2	31217.8
112	Prevalence	Eastern Sub-Saharan Africa	Both	45-49 years	Caries of permanent teeth	Rate	1990	45493.9	56961.2	34070.4
113	Prevalence	Eastern Sub-Saharan Africa	Both	45-49 years	Caries of permanent teeth	Rate	2021	42339.7	53373.4	31337.1
114	Prevalence	Eastern Sub-Saharan Africa	Both	50-54 years	Caries of permanent teeth	Rate	1990	43539.4	54956.6	31045.1
115	Prevalence	Eastern Sub-Saharan Africa	Both	50-54 years	Caries of permanent teeth	Rate	2021	40374.9	51982.1	28289.4
116	Prevalence	Eastern Sub-Saharan Africa	Both	55-59 years	Caries of permanent teeth	Rate	1990	41878.9	53328.5	30946.5
117	Prevalence	Eastern Sub-Saharan Africa	Both	55-59 years	Caries of permanent teeth	Rate	2021	38994.2	49992.4	28687.4
118	Prevalence	Eastern Sub-Saharan Africa	Both	60-64 years	Caries of permanent teeth	Rate	1990	40902.7	51812.9	32023.2
119	Prevalence	Eastern Sub-Saharan Africa	Both	60-64 years	Caries of permanent teeth	Rate	2021	38332.5	48537.8	29574.8
120	Prevalence	Eastern Sub-Saharan Africa	Both	65-69 years	Caries of permanent teeth	Rate	1990	40324.1	48611	31312.4
121	Prevalence	Caribbean	Both	65-69 years	Caries of permanent teeth	Rate	2021	34160.1	42261	26843.6
122	Prevalence	Caribbean	Both	70+ years	Caries of permanent teeth	Rate	1990	33752.5	42692.9	25049.2
123	Prevalence	Caribbean	Both	70+ years	Caries of permanent teeth	Rate	2021	30082.6	36009.3	24467.1
124	Prevalence	South Asia	Both	65-69 years	Caries of permanent teeth	Rate	2021	44835.8	53609.3	35160.1
125	Prevalence	South Asia	Both	70+ years	Caries of permanent teeth	Rate	1990	44810.2	52843.5	36265.5
126	Prevalence	South Asia	Both	70+ years	Caries of permanent teeth	Rate	2021	42721.8	50302.1	34946.4
127	Prevalence	Eastern Sub-Saharan Africa	Both	65-69 years	Caries of permanent teeth	Rate	2021	37617.1	45279	29527.7
128	Prevalence	Eastern Sub-Saharan Africa	Both	70+ years	Caries of permanent teeth	Rate	1990	37245.9	44523.2	29436.4
129	Prevalence	Eastern Sub-Saharan Africa	Both	70+ years	Caries of permanent teeth	Rate	2021	33650.5	40251.4	27127.7
130	Prevalence	Central Sub-Saharan Africa	Both	65-69 years	Caries of permanent teeth	Rate	2021	39384	50540.7	28214.8
131	Prevalence	Central Sub-Saharan Africa	Both	70+ years	Caries of permanent teeth	Rate	1990	35550.4	45845	25626.3
132	Prevalence	Central Sub-Saharan Africa	Both	70+ years	Caries of permanent teeth	Rate	2021	35625.5	44664.1	26154.8
133	Prevalence	Southern Sub-Saharan Africa	Both	65-69 years	Caries of permanent teeth	Rate	2021	28857.6	37458.5	20807.9
134	Prevalence	Southern Sub-Saharan Africa	Both	70+ years	Caries of permanent teeth	Rate	1990	25817.5	33387.4	18893.6
135	Prevalence	Southern Sub-Saharan Africa	Both	70+ years	Caries of permanent teeth	Rate	2021	25186.7	32359.9	18699.8
136	Prevalence	Southern Sub-Saharan Africa	Both	5-9 years	Caries of permanent teeth	Rate	1990	4461.11	8729.04	1913.23
137	Prevalence	Southern Sub-Saharan Africa	Both	5-9 years	Caries of permanent teeth	Rate	2021	4936.91	9110.67	2358.26
138	Prevalence	Southern Sub-Saharan Africa	Both	10-14 years	Caries of permanent teeth	Rate	1990	15144.7	25048	8967.48
139	Prevalence	Southern Sub-Saharan Africa	Both	10-14 years	Caries of permanent teeth	Rate	2021	17045.6	27814.6	10158.4
140	Prevalence	Southern Sub-Saharan Africa	Both	15-19 years	Caries of permanent teeth	Rate	1990	26588.6	38140.1	17625.9
141	Prevalence	Southern Sub-Saharan Africa	Both	15-19 years	Caries of permanent teeth	Rate	2021	26824.8	38567	18060.9
142	Prevalence	Southern Sub-Saharan Africa	Both	25-29 years	Caries of permanent teeth	Rate	1990	38599.4	55708.8	27178.3
143	Prevalence	Southern Sub-Saharan Africa	Both	25-29 years	Caries of permanent teeth	Rate	2021	36711.1	53279.7	26307.1
144	Prevalence	Southern Sub-Saharan Africa	Both	30-34 years	Caries of permanent teeth	Rate	1990	37957.5	54582.5	26261.6
145	Prevalence	Southern Sub-Saharan Africa	Both	30-34 years	Caries of permanent teeth	Rate	2021	34400.1	48844.1	24382.8
146	Prevalence	Southern Sub-Saharan Africa	Both	35-39 years	Caries of permanent teeth	Rate	1990	40856.4	55445.9	25550.1
147	Prevalence	Southern Sub-Saharan Africa	Both	35-39 years	Caries of permanent teeth	Rate	2021	35550.7	49589.1	22516.9
148	Prevalence	Southern Sub-Saharan Africa	Both	40-44 years	Caries of permanent teeth	Rate	1990	41038.4	55167.1	25823.3
149	Prevalence	Southern Sub-Saharan Africa	Both	40-44 years	Caries of permanent teeth	Rate	2021	35407.5	49119.6	22797.8
150	Prevalence	Southern Sub-Saharan Africa	Both	45-49 years	Caries of permanent teeth	Rate	1990	37836.7	50642.9	25135.3
151	Prevalence	Southern Sub-Saharan Africa	Both	45-49 years	Caries of permanent teeth	Rate	2021	33684.1	46192.3	22855
152	Prevalence	Southern Sub-Saharan Africa	Both	50-54 years	Caries of permanent teeth	Rate	1990	33989.3	47315.5	21576
153	Prevalence	Southern Sub-Saharan Africa	Both	50-54 years	Caries of permanent teeth	Rate	2021	31765.3	44168.7	20881.7
154	Prevalence	Southern Sub-Saharan Africa	Both	55-59 years	Caries of permanent teeth	Rate	1990	31321	44202	20610
155	Prevalence	Southern Sub-Saharan Africa	Both	55-59 years	Caries of permanent teeth	Rate	2021	30200.6	43131.8	20015.3
156	Prevalence	Southern Sub-Saharan Africa	Both	60-64 years	Caries of permanent teeth	Rate	1990	30054.6	42002.6	20664
157	Prevalence	Southern Sub-Saharan Africa	Both	60-64 years	Caries of permanent teeth	Rate	2021	29273	41124.2	20363.2
158	Prevalence	Southern Sub-Saharan Africa	Both	65-69 years	Caries of permanent teeth	Rate	1990	29643.9	38798	20955.1
159	Prevalence	Western Sub-Saharan Africa	Both	5-9 years	Caries of permanent teeth	Rate	1990	5137.96	9669.28	2395.28
160	Prevalence	Western Sub-Saharan Africa	Both	5-9 years	Caries of permanent teeth	Rate	2021	4818.32	8833.47	2350.51
161	Prevalence	Western Sub-Saharan Africa	Both	10-14 years	Caries of permanent teeth	Rate	1990	21912	34060.7	14115.3
162	Prevalence	Western Sub-Saharan Africa	Both	10-14 years	Caries of permanent teeth	Rate	2021	20509.7	31246.2	13157.9
163	Prevalence	Western Sub-Saharan Africa	Both	15-19 years	Caries of permanent teeth	Rate	1990	32298.2	43647.1	22410.3
164	Prevalence	Western Sub-Saharan Africa	Both	15-19 years	Caries of permanent teeth	Rate	2021	30453.4	40828.2	21941.8
165	Prevalence	Western Sub-Saharan Africa	Both	25-29 years	Caries of permanent teeth	Rate	1990	37982.3	53083.3	27523.4
166	Prevalence	Western Sub-Saharan Africa	Both	25-29 years	Caries of permanent teeth	Rate	2021	36467.8	49866.1	26911.6
167	Prevalence	Western Sub-Saharan Africa	Both	30-34 years	Caries of permanent teeth	Rate	1990	35537.8	49655.1	25843.7
168	Prevalence	Western Sub-Saharan Africa	Both	30-34 years	Caries of permanent teeth	Rate	2021	34300.6	46692.5	25662.5
169	Prevalence	Western Sub-Saharan Africa	Both	35-39 years	Caries of permanent teeth	Rate	1990	36437.1	48947.8	24260.5
170	Prevalence	Western Sub-Saharan Africa	Both	35-39 years	Caries of permanent teeth	Rate	2021	35194	46582.6	23943.3
171	Prevalence	Western Sub-Saharan Africa	Both	40-44 years	Caries of permanent teeth	Rate	1990	36180.6	48966.2	24482.2
172	Prevalence	Western Sub-Saharan Africa	Both	40-44 years	Caries of permanent teeth	Rate	2021	34663.2	46414.7	24256.4
173	Prevalence	Western Sub-Saharan Africa	Both	45-49 years	Caries of permanent teeth	Rate	1990	34392.1	45366.9	24270.1
174	Prevalence	Western Sub-Saharan Africa	Both	45-49 years	Caries of permanent teeth	Rate	2021	32663.9	43168.2	23459.1
175	Prevalence	Western Sub-Saharan Africa	Both	50-54 years	Caries of permanent teeth	Rate	1990	32599.2	44380.1	21497.2
176	Prevalence	Western Sub-Saharan Africa	Both	50-54 years	Caries of permanent teeth	Rate	2021	30314.7	40966.1	20305.1
177	Prevalence	Western Sub-Saharan Africa	Both	55-59 years	Caries of permanent teeth	Rate	1990	31051.4	42467.4	21051.6
178	Prevalence	Western Sub-Saharan Africa	Both	55-59 years	Caries of permanent teeth	Rate	2021	28760.4	38947.2	20164.8
179	Prevalence	Western Sub-Saharan Africa	Both	60-64 years	Caries of permanent teeth	Rate	1990	30024.7	41144	21433.8
180	Prevalence	Western Sub-Saharan Africa	Both	60-64 years	Caries of permanent teeth	Rate	2021	28115.1	37915.4	20316.9
181	Prevalence	Western Sub-Saharan Africa	Both	65-69 years	Caries of permanent teeth	Rate	1990	29226	36915.4	21636.8
182	Prevalence	Western Sub-Saharan Africa	Both	65-69 years	Caries of permanent teeth	Rate	2021	28027.6	35280.1	20938.5
183	Prevalence	Western Sub-Saharan Africa	Both	70+ years	Caries of permanent teeth	Rate	1990	25723	31969.2	19534.9
184	Prevalence	Western Sub-Saharan Africa	Both	70+ years	Caries of permanent teeth	Rate	2021	24709.2	30597.6	19008.1
185	Prevalence	Southeast Asia	Both	5-9 years	Caries of permanent teeth	Rate	1990	12694.4	22576.5	5899.08
186	Prevalence	Southeast Asia	Both	5-9 years	Caries of permanent teeth	Rate	2021	11246	19702.1	5337.77
187	Prevalence	Southeast Asia	Both	10-14 years	Caries of permanent teeth	Rate	1990	30498.6	43074.2	18850
188	Prevalence	Southeast Asia	Both	10-14 years	Caries of permanent teeth	Rate	2021	27309.3	38871.2	17451.1
189	Prevalence	Southeast Asia	Both	15-19 years	Caries of permanent teeth	Rate	1990	33374.4	47673.6	21016.6
190	Prevalence	Southeast Asia	Both	15-19 years	Caries of permanent teeth	Rate	2021	30830.7	43613.5	20000.5
191	Prevalence	Southeast Asia	Both	25-29 years	Caries of permanent teeth	Rate	1990	39501.4	57365.9	27791.8
192	Prevalence	Southeast Asia	Both	25-29 years	Caries of permanent teeth	Rate	2021	37540.6	53917.8	27139.9
193	Prevalence	Southeast Asia	Both	30-34 years	Caries of permanent teeth	Rate	1990	38237.4	54616	27075.8
194	Prevalence	Southeast Asia	Both	30-34 years	Caries of permanent teeth	Rate	2021	36174.3	51094.7	26376.3
195	Prevalence	Southeast Asia	Both	35-39 years	Caries of permanent teeth	Rate	1990	39887.1	54660.6	26013.6
196	Prevalence	Southeast Asia	Both	35-39 years	Caries of permanent teeth	Rate	2021	37696.4	52046.3	24887.3
197	Prevalence	Southeast Asia	Both	40-44 years	Caries of permanent teeth	Rate	1990	40678.1	54689.8	26590
198	Prevalence	Southeast Asia	Both	40-44 years	Caries of permanent teeth	Rate	2021	38280.5	52380.5	25694.3
199	Prevalence	Southeast Asia	Both	45-49 years	Caries of permanent teeth	Rate	1990	40491.1	54365.9	27221.5
200	Prevalence	Southeast Asia	Both	45-49 years	Caries of permanent teeth	Rate	2021	37991.6	51386.3	25733.6
201	Prevalence	Southeast Asia	Both	50-54 years	Caries of permanent teeth	Rate	1990	40545.3	55264.2	25613
202	Prevalence	Southeast Asia	Both	50-54 years	Caries of permanent teeth	Rate	2021	38121.7	52912.6	24564.6
203	Prevalence	Southeast Asia	Both	55-59 years	Caries of permanent teeth	Rate	1990	40965	56350.6	27003.2
204	Prevalence	Southeast Asia	Both	55-59 years	Caries of permanent teeth	Rate	2021	38518.1	53675.3	25396
205	Prevalence	Southeast Asia	Both	60-64 years	Caries of permanent teeth	Rate	1990	41440.3	55046.7	30669.2
206	Prevalence	Southeast Asia	Both	60-64 years	Caries of permanent teeth	Rate	2021	38959.4	52158.1	28593.8
207	Prevalence	Southeast Asia	Both	65-69 years	Caries of permanent teeth	Rate	1990	41672.5	52570.4	30676.3
208	Prevalence	East Asia	Both	65-69 years	Caries of permanent teeth	Rate	2021	20803.9	27358.7	15248.2
209	Prevalence	East Asia	Both	70+ years	Caries of permanent teeth	Rate	1990	18606.9	24355.6	13042.8
210	Prevalence	East Asia	Both	70+ years	Caries of permanent teeth	Rate	2021	18580.8	23963.8	14144.5
211	Prevalence	East Asia	Both	5-9 years	Caries of permanent teeth	Rate	1990	7696.26	14713.7	3240.13
212	Prevalence	East Asia	Both	5-9 years	Caries of permanent teeth	Rate	2021	3715.84	7215.01	1762.68
213	Prevalence	East Asia	Both	10-14 years	Caries of permanent teeth	Rate	1990	20526.2	35691.6	10802.7
214	Prevalence	East Asia	Both	10-14 years	Caries of permanent teeth	Rate	2021	14547.6	24275.2	8608.92
215	Prevalence	East Asia	Both	15-19 years	Caries of permanent teeth	Rate	1990	23628.5	38482.2	13989.1
216	Prevalence	East Asia	Both	15-19 years	Caries of permanent teeth	Rate	2021	24985.7	35980.8	16551
217	Prevalence	East Asia	Both	25-29 years	Caries of permanent teeth	Rate	1990	30109.6	47657.7	18098.7
218	Prevalence	East Asia	Both	25-29 years	Caries of permanent teeth	Rate	2021	30691.5	46194.7	21358
219	Prevalence	East Asia	Both	30-34 years	Caries of permanent teeth	Rate	1990	23090.5	35676.4	14804.7
220	Prevalence	East Asia	Both	30-34 years	Caries of permanent teeth	Rate	2021	25763.1	36912.3	17733.8
221	Prevalence	East Asia	Both	35-39 years	Caries of permanent teeth	Rate	1990	21845.6	33312.8	12309.9
222	Prevalence	East Asia	Both	35-39 years	Caries of permanent teeth	Rate	2021	24676.5	36514	15821.1
223	Prevalence	East Asia	Both	40-44 years	Caries of permanent teeth	Rate	1990	21179.6	32830.8	11997.6
224	Prevalence	East Asia	Both	40-44 years	Caries of permanent teeth	Rate	2021	23677.3	35108.5	15258.1
225	Prevalence	East Asia	Both	45-49 years	Caries of permanent teeth	Rate	1990	20465.2	30587.5	12794.3
226	Prevalence	East Asia	Both	45-49 years	Caries of permanent teeth	Rate	2021	22538.6	32006	15569.6
227	Prevalence	East Asia	Both	50-54 years	Caries of permanent teeth	Rate	1990	20212.2	30287.3	11762.8
228	Prevalence	East Asia	Both	50-54 years	Caries of permanent teeth	Rate	2021	21942.7	30816.3	14350.8
229	Prevalence	East Asia	Both	55-59 years	Caries of permanent teeth	Rate	1990	20022	30316	12432.5
230	Prevalence	East Asia	Both	55-59 years	Caries of permanent teeth	Rate	2021	21455.2	30512.1	14148.4
231	Prevalence	East Asia	Both	60-64 years	Caries of permanent teeth	Rate	1990	19834.2	29481.7	13265.3
232	Prevalence	East Asia	Both	60-64 years	Caries of permanent teeth	Rate	2021	20921.4	29600.5	14487.6
233	Prevalence	East Asia	Both	65-69 years	Caries of permanent teeth	Rate	1990	19962.6	27425.7	13872.3
234	Prevalence	Oceania	Both	5-9 years	Caries of permanent teeth	Rate	1990	20062.4	31129.6	10050.6
235	Prevalence	Oceania	Both	5-9 years	Caries of permanent teeth	Rate	2021	19695.4	30705.1	9520.72
236	Prevalence	Oceania	Both	10-14 years	Caries of permanent teeth	Rate	1990	38898.1	54747.1	24075.1
237	Prevalence	Oceania	Both	10-14 years	Caries of permanent teeth	Rate	2021	38330.7	53719.6	23656.2
238	Prevalence	Oceania	Both	15-19 years	Caries of permanent teeth	Rate	1990	43563.8	60681.1	28837.9
239	Prevalence	Oceania	Both	15-19 years	Caries of permanent teeth	Rate	2021	43376.1	60863.1	28408.5
240	Prevalence	Oceania	Both	25-29 years	Caries of permanent teeth	Rate	1990	52826.1	71547.1	35710.7
241	Prevalence	Oceania	Both	25-29 years	Caries of permanent teeth	Rate	2021	51872.2	70726.6	35028.5
242	Prevalence	Oceania	Both	30-34 years	Caries of permanent teeth	Rate	1990	50340.2	68272	35354.4
243	Prevalence	Oceania	Both	30-34 years	Caries of permanent teeth	Rate	2021	49384.4	67592.9	34599.9
244	Prevalence	Oceania	Both	35-39 years	Caries of permanent teeth	Rate	1990	50769.3	66201.2	32198.2
245	Prevalence	Oceania	Both	35-39 years	Caries of permanent teeth	Rate	2021	50086	66392.6	31667
246	Prevalence	Oceania	Both	40-44 years	Caries of permanent teeth	Rate	1990	50806	64979.2	31538.1
247	Prevalence	Oceania	Both	40-44 years	Caries of permanent teeth	Rate	2021	50241	65285.5	32246.3
248	Prevalence	Oceania	Both	45-49 years	Caries of permanent teeth	Rate	1990	49725.3	64048.5	33198.9
249	Prevalence	Oceania	Both	45-49 years	Caries of permanent teeth	Rate	2021	49201.9	63346.2	34077.6
250	Prevalence	Oceania	Both	50-54 years	Caries of permanent teeth	Rate	1990	48558.4	63271.7	30880.1
251	Prevalence	Oceania	Both	50-54 years	Caries of permanent teeth	Rate	2021	48054.5	62121.7	30491.2
252	Prevalence	Oceania	Both	55-59 years	Caries of permanent teeth	Rate	1990	47838.9	62161.6	33416.4
253	Prevalence	Oceania	Both	55-59 years	Caries of permanent teeth	Rate	2021	47263.3	60672.6	32936.3
254	Prevalence	Oceania	Both	60-64 years	Caries of permanent teeth	Rate	1990	47744.7	60428.5	35497
255	Prevalence	Oceania	Both	60-64 years	Caries of permanent teeth	Rate	2021	47129.9	60484	35529.8
256	Prevalence	Oceania	Both	65-69 years	Caries of permanent teeth	Rate	1990	47353.3	57498.7	35704.1
257	Prevalence	Global	Both	65-69 years	Caries of permanent teeth	Rate	2021	32432.7	40033.1	24646.6
258	Prevalence	Global	Both	70+ years	Caries of permanent teeth	Rate	1990	30814.9	37906.1	23762.5
259	Prevalence	Global	Both	70+ years	Caries of permanent teeth	Rate	2021	28741.8	34524	22879.6
260	Prevalence	Global	Both	5-9 years	Caries of permanent teeth	Rate	1990	9496.68	16003.3	4802.12
261	Prevalence	Global	Both	5-9 years	Caries of permanent teeth	Rate	2021	8060.5	13424	4034.26
262	Prevalence	Global	Both	10-14 years	Caries of permanent teeth	Rate	1990	26313.7	37762.8	16793.3
263	Prevalence	Global	Both	10-14 years	Caries of permanent teeth	Rate	2021	23989.4	34167.9	15620.6
264	Prevalence	Global	Both	15-19 years	Caries of permanent teeth	Rate	1990	30747.8	43162.3	20757.7
265	Prevalence	Global	Both	15-19 years	Caries of permanent teeth	Rate	2021	30718.3	41982.1	21337.5
266	Prevalence	Global	Both	25-29 years	Caries of permanent teeth	Rate	1990	38100.1	55100.7	26503.8
267	Prevalence	Global	Both	25-29 years	Caries of permanent teeth	Rate	2021	37842.4	53114.7	27751.8
268	Prevalence	Global	Both	30-34 years	Caries of permanent teeth	Rate	1990	35509.9	50155.5	25745.7
269	Prevalence	Global	Both	30-34 years	Caries of permanent teeth	Rate	2021	35193.2	48401.8	26021.3
270	Prevalence	Global	Both	35-39 years	Caries of permanent teeth	Rate	1990	35501.5	48660.9	23002
271	Prevalence	Global	Both	35-39 years	Caries of permanent teeth	Rate	2021	36242.1	48639.2	24752.7
272	Prevalence	Global	Both	40-44 years	Caries of permanent teeth	Rate	1990	35837.7	48671.3	23630.4
273	Prevalence	Global	Both	40-44 years	Caries of permanent teeth	Rate	2021	36484	49062.8	24901.4
274	Prevalence	Global	Both	45-49 years	Caries of permanent teeth	Rate	1990	35683.1	47469.2	24858.4
275	Prevalence	Global	Both	45-49 years	Caries of permanent teeth	Rate	2021	35077.4	46213.3	24873.4
276	Prevalence	Global	Both	50-54 years	Caries of permanent teeth	Rate	1990	35511	47683.2	22850.3
277	Prevalence	Global	Both	50-54 years	Caries of permanent teeth	Rate	2021	33846.9	45230	22826.9
278	Prevalence	Global	Both	55-59 years	Caries of permanent teeth	Rate	1990	34927.7	46972.8	24182.3
279	Prevalence	Global	Both	55-59 years	Caries of permanent teeth	Rate	2021	33278.1	44246.3	23561.7
280	Prevalence	Global	Both	60-64 years	Caries of permanent teeth	Rate	1990	34676.6	45852.6	26062.6
281	Prevalence	Global	Both	60-64 years	Caries of permanent teeth	Rate	2021	33634.9	44075	25339.2
282	Prevalence	Global	Both	65-69 years	Caries of permanent teeth	Rate	1990	34168.1	42484.5	25548.4
283	Prevalence	Oceania	Both	65-69 years	Caries of permanent teeth	Rate	2021	46767.3	57547	35919.9
284	Prevalence	Oceania	Both	70+ years	Caries of permanent teeth	Rate	1990	44506.6	54046.6	34776.1
285	Prevalence	Oceania	Both	70+ years	Caries of permanent teeth	Rate	2021	43526.1	52095.5	33590
286	Prevalence	Central Europe	Both	65-69 years	Caries of permanent teeth	Rate	2021	37930	48508.2	27802.4
287	Prevalence	Central Europe	Both	70+ years	Caries of permanent teeth	Rate	1990	30247.7	38238	23325.3
288	Prevalence	Central Europe	Both	70+ years	Caries of permanent teeth	Rate	2021	28823.4	35911.1	22150.4
289	Prevalence	Central Europe	Both	5-9 years	Caries of permanent teeth	Rate	1990	19344.1	26955.6	12255.3
290	Prevalence	Central Europe	Both	5-9 years	Caries of permanent teeth	Rate	2021	14799.1	22939.7	7992.65
291	Prevalence	Central Europe	Both	10-14 years	Caries of permanent teeth	Rate	1990	41242.8	50857	30798.1
292	Prevalence	Central Europe	Both	10-14 years	Caries of permanent teeth	Rate	2021	32121.6	42984.3	21859.7
293	Prevalence	Central Europe	Both	15-19 years	Caries of permanent teeth	Rate	1990	44577.6	57241.1	31716.8
294	Prevalence	Central Europe	Both	15-19 years	Caries of permanent teeth	Rate	2021	38002.1	50917.9	25634.4
295	Prevalence	Central Europe	Both	25-29 years	Caries of permanent teeth	Rate	1990	52410.7	67065	37412
296	Prevalence	Central Europe	Both	25-29 years	Caries of permanent teeth	Rate	2021	49180.8	64173.7	35268
297	Prevalence	Central Europe	Both	30-34 years	Caries of permanent teeth	Rate	1990	50388.9	64855.6	37751.7
298	Prevalence	Central Europe	Both	30-34 years	Caries of permanent teeth	Rate	2021	47673	61830.7	36343.8
299	Prevalence	Central Europe	Both	35-39 years	Caries of permanent teeth	Rate	1990	50515.7	65118.6	35650.5
300	Prevalence	Central Europe	Both	35-39 years	Caries of permanent teeth	Rate	2021	47777.9	62178.5	33845
301	Prevalence	Central Europe	Both	40-44 years	Caries of permanent teeth	Rate	1990	49836.1	63130.3	34425.7
302	Prevalence	Central Europe	Both	40-44 years	Caries of permanent teeth	Rate	2021	47446	60555.3	32998.8
303	Prevalence	Central Europe	Both	45-49 years	Caries of permanent teeth	Rate	1990	49150	62212.5	35189.8
304	Prevalence	Central Europe	Both	45-49 years	Caries of permanent teeth	Rate	2021	46498.1	58844.9	33293.6
305	Prevalence	Central Europe	Both	50-54 years	Caries of permanent teeth	Rate	1990	47780.9	62724.5	32363.2
306	Prevalence	Central Europe	Both	50-54 years	Caries of permanent teeth	Rate	2021	45680.5	60071.5	30522.7
307	Prevalence	Central Europe	Both	55-59 years	Caries of permanent teeth	Rate	1990	45896.7	60292.4	32781.5
308	Prevalence	Central Europe	Both	55-59 years	Caries of permanent teeth	Rate	2021	43511	57373.2	31137.8
309	Prevalence	Central Europe	Both	60-64 years	Caries of permanent teeth	Rate	1990	43374.8	56514	32909.4
310	Prevalence	Central Europe	Both	60-64 years	Caries of permanent teeth	Rate	2021	41006.5	53354.7	31209.5
311	Prevalence	Central Europe	Both	65-69 years	Caries of permanent teeth	Rate	1990	40113.7	51158	29231.6
312	Prevalence	Eastern Europe	Both	5-9 years	Caries of permanent teeth	Rate	1990	12426.9	21638.6	5935.21
313	Prevalence	Eastern Europe	Both	5-9 years	Caries of permanent teeth	Rate	2021	10081.1	17462.7	4719.36
314	Prevalence	Eastern Europe	Both	10-14 years	Caries of permanent teeth	Rate	1990	28784.4	40390.5	18695
315	Prevalence	Eastern Europe	Both	10-14 years	Caries of permanent teeth	Rate	2021	25630.1	36699.6	16368.8
316	Prevalence	Eastern Europe	Both	15-19 years	Caries of permanent teeth	Rate	1990	32005.3	44632.5	20793.3
317	Prevalence	Eastern Europe	Both	15-19 years	Caries of permanent teeth	Rate	2021	29829.5	42147.7	19508.2
318	Prevalence	Eastern Europe	Both	25-29 years	Caries of permanent teeth	Rate	1990	41753.1	59439.8	28985.7
319	Prevalence	Eastern Europe	Both	25-29 years	Caries of permanent teeth	Rate	2021	41403.8	59042.8	29310.7
320	Prevalence	Eastern Europe	Both	30-34 years	Caries of permanent teeth	Rate	1990	40853.9	58188.4	28734.8
321	Prevalence	Eastern Europe	Both	30-34 years	Caries of permanent teeth	Rate	2021	40696.4	57648.6	28992.1
322	Prevalence	Eastern Europe	Both	35-39 years	Caries of permanent teeth	Rate	1990	42044.9	57691.5	27216.8
323	Prevalence	Eastern Europe	Both	35-39 years	Caries of permanent teeth	Rate	2021	41981.7	56913.8	27559.4
324	Prevalence	Eastern Europe	Both	40-44 years	Caries of permanent teeth	Rate	1990	42275.9	57075.4	27747.8
325	Prevalence	Eastern Europe	Both	40-44 years	Caries of permanent teeth	Rate	2021	42304.1	56618.6	28004.8
326	Prevalence	Eastern Europe	Both	45-49 years	Caries of permanent teeth	Rate	1990	41342.6	55135.2	27707.5
327	Prevalence	Eastern Europe	Both	45-49 years	Caries of permanent teeth	Rate	2021	41570.3	54360.5	28280
328	Prevalence	Eastern Europe	Both	50-54 years	Caries of permanent teeth	Rate	1990	40153.3	55492.8	26004.3
329	Prevalence	Eastern Europe	Both	50-54 years	Caries of permanent teeth	Rate	2021	40312.7	55542.2	26171.1
330	Prevalence	Eastern Europe	Both	55-59 years	Caries of permanent teeth	Rate	1990	38336.3	53447.3	25055.2
331	Prevalence	Eastern Europe	Both	55-59 years	Caries of permanent teeth	Rate	2021	38631.7	53275.5	25814.4
332	Prevalence	Eastern Europe	Both	60-64 years	Caries of permanent teeth	Rate	1990	36516.3	49924.5	26857.9
333	Prevalence	Eastern Europe	Both	60-64 years	Caries of permanent teeth	Rate	2021	37021	50416.3	27306.7
334	Prevalence	Eastern Europe	Both	65-69 years	Caries of permanent teeth	Rate	1990	34817.2	45549	24747.6
335	Prevalence	High-income Asia Pacific	Both	5-9 years	Caries of permanent teeth	Rate	1990	4567.89	8830.45	1963.02
336	Prevalence	High-income Asia Pacific	Both	5-9 years	Caries of permanent teeth	Rate	2021	3892.73	7011.35	1901.99
337	Prevalence	High-income Asia Pacific	Both	10-14 years	Caries of permanent teeth	Rate	1990	17269	26326.3	10502.7
338	Prevalence	High-income Asia Pacific	Both	10-14 years	Caries of permanent teeth	Rate	2021	14493.3	21722.8	9003.99
339	Prevalence	High-income Asia Pacific	Both	15-19 years	Caries of permanent teeth	Rate	1990	25153.1	34717.9	17380.8
340	Prevalence	High-income Asia Pacific	Both	15-19 years	Caries of permanent teeth	Rate	2021	22848.7	30162.3	16155.9
341	Prevalence	High-income Asia Pacific	Both	25-29 years	Caries of permanent teeth	Rate	1990	29665.2	41683.2	22569.4
342	Prevalence	High-income Asia Pacific	Both	25-29 years	Caries of permanent teeth	Rate	2021	26252.2	36298	20183.6
343	Prevalence	High-income Asia Pacific	Both	30-34 years	Caries of permanent teeth	Rate	1990	25120.9	35331.3	18594.9
344	Prevalence	High-income Asia Pacific	Both	30-34 years	Caries of permanent teeth	Rate	2021	20916.8	28570.8	15761.8
345	Prevalence	High-income Asia Pacific	Both	35-39 years	Caries of permanent teeth	Rate	1990	21787.7	32358.6	15404.9
346	Prevalence	High-income Asia Pacific	Both	35-39 years	Caries of permanent teeth	Rate	2021	18150.7	26187	13136.9
347	Prevalence	High-income Asia Pacific	Both	40-44 years	Caries of permanent teeth	Rate	1990	18633.9	26571.4	13141.8
348	Prevalence	High-income Asia Pacific	Both	40-44 years	Caries of permanent teeth	Rate	2021	15924.3	23081.9	11303.1
349	Prevalence	High-income Asia Pacific	Both	45-49 years	Caries of permanent teeth	Rate	1990	16515.1	22564.4	11887.4
350	Prevalence	High-income Asia Pacific	Both	45-49 years	Caries of permanent teeth	Rate	2021	13734.4	18418.1	10295.8
351	Prevalence	High-income Asia Pacific	Both	50-54 years	Caries of permanent teeth	Rate	1990	15277.1	21858.4	10574.6
352	Prevalence	High-income Asia Pacific	Both	50-54 years	Caries of permanent teeth	Rate	2021	12934.2	18260.2	9262.96
353	Prevalence	High-income Asia Pacific	Both	55-59 years	Caries of permanent teeth	Rate	1990	13445.5	20144.6	9037.02
354	Prevalence	High-income Asia Pacific	Both	55-59 years	Caries of permanent teeth	Rate	2021	12007.5	17518.3	8206.84
355	Prevalence	High-income Asia Pacific	Both	60-64 years	Caries of permanent teeth	Rate	1990	11855.4	17156	8161.83
356	Prevalence	High-income Asia Pacific	Both	60-64 years	Caries of permanent teeth	Rate	2021	11150.2	16186.3	7816.11
357	Prevalence	High-income Asia Pacific	Both	65-69 years	Caries of permanent teeth	Rate	1990	11451.1	15514.8	8004.27
358	Prevalence	Australasia	Both	5-9 years	Caries of permanent teeth	Rate	1990	4459.22	5582.89	3619.11
359	Prevalence	Australasia	Both	5-9 years	Caries of permanent teeth	Rate	2021	4339.07	9017.35	1618.91
360	Prevalence	Australasia	Both	10-14 years	Caries of permanent teeth	Rate	1990	19123.8	22588.6	15901.4
361	Prevalence	Australasia	Both	10-14 years	Caries of permanent teeth	Rate	2021	16572.4	28223	8972.72
362	Prevalence	Australasia	Both	15-19 years	Caries of permanent teeth	Rate	1990	30498.3	40000.9	22224.5
363	Prevalence	Australasia	Both	15-19 years	Caries of permanent teeth	Rate	2021	26131.9	38581.1	16448.8
364	Prevalence	Australasia	Both	25-29 years	Caries of permanent teeth	Rate	1990	44481.5	61752.3	31374.1
365	Prevalence	Australasia	Both	25-29 years	Caries of permanent teeth	Rate	2021	38295.7	58050.6	26183.7
366	Prevalence	Australasia	Both	30-34 years	Caries of permanent teeth	Rate	1990	42832.8	58129.3	30626.7
367	Prevalence	Australasia	Both	30-34 years	Caries of permanent teeth	Rate	2021	36539.1	52528.9	24165.6
368	Prevalence	Australasia	Both	35-39 years	Caries of permanent teeth	Rate	1990	42010.3	56880.3	28314.9
369	Prevalence	Australasia	Both	35-39 years	Caries of permanent teeth	Rate	2021	36412.1	51906.1	21739.8
370	Prevalence	Australasia	Both	40-44 years	Caries of permanent teeth	Rate	1990	40608.8	54965.9	26842.3
371	Prevalence	Australasia	Both	40-44 years	Caries of permanent teeth	Rate	2021	35601.4	50897.8	21455.4
372	Prevalence	Australasia	Both	45-49 years	Caries of permanent teeth	Rate	1990	39290.6	51597.2	28408.6
373	Prevalence	Australasia	Both	45-49 years	Caries of permanent teeth	Rate	2021	34443.4	49063.7	21278
374	Prevalence	Australasia	Both	50-54 years	Caries of permanent teeth	Rate	1990	38599.6	52763.8	25742.3
375	Prevalence	Australasia	Both	50-54 years	Caries of permanent teeth	Rate	2021	33570.5	48941.5	19998.6
376	Prevalence	Australasia	Both	55-59 years	Caries of permanent teeth	Rate	1990	37553.5	50730.6	26154.6
377	Prevalence	Australasia	Both	55-59 years	Caries of permanent teeth	Rate	2021	32455.7	47109.7	20503.7
378	Prevalence	Australasia	Both	60-64 years	Caries of permanent teeth	Rate	1990	36409	48280.3	26670.6
379	Prevalence	Australasia	Both	60-64 years	Caries of permanent teeth	Rate	2021	31470.9	44341.4	21153.9
380	Prevalence	Australasia	Both	65-69 years	Caries of permanent teeth	Rate	1990	35712.4	44719.5	27185.3
381	Prevalence	Western Europe	Both	5-9 years	Caries of permanent teeth	Rate	1990	11940.5	15910.4	9188.7
382	Prevalence	Western Europe	Both	5-9 years	Caries of permanent teeth	Rate	2021	9625.63	15056.6	5657.77
383	Prevalence	Western Europe	Both	10-14 years	Caries of permanent teeth	Rate	1990	30831.2	37711.5	24996.2
384	Prevalence	Western Europe	Both	10-14 years	Caries of permanent teeth	Rate	2021	26107.6	34376.9	18157.6
385	Prevalence	Western Europe	Both	15-19 years	Caries of permanent teeth	Rate	1990	33690.4	43856.3	24918.4
386	Prevalence	Western Europe	Both	15-19 years	Caries of permanent teeth	Rate	2021	29769.7	39333	21281
387	Prevalence	Western Europe	Both	25-29 years	Caries of permanent teeth	Rate	1990	42328.5	61542.1	28973
388	Prevalence	Western Europe	Both	25-29 years	Caries of permanent teeth	Rate	2021	39452	51686.4	29678.3
389	Prevalence	Western Europe	Both	30-34 years	Caries of permanent teeth	Rate	1990	42590.6	59617.1	30324.3
390	Prevalence	Western Europe	Both	30-34 years	Caries of permanent teeth	Rate	2021	39091.7	50216.4	29873.2
391	Prevalence	Western Europe	Both	35-39 years	Caries of permanent teeth	Rate	1990	44350.7	59208.7	28986.5
392	Prevalence	Western Europe	Both	35-39 years	Caries of permanent teeth	Rate	2021	41389.6	53184.7	29908.2
393	Prevalence	Western Europe	Both	40-44 years	Caries of permanent teeth	Rate	1990	45638.7	59538.6	29803.3
394	Prevalence	Western Europe	Both	40-44 years	Caries of permanent teeth	Rate	2021	42759.1	54490.9	31075.6
395	Prevalence	Western Europe	Both	45-49 years	Caries of permanent teeth	Rate	1990	46849.7	59781.5	32621.3
396	Prevalence	Western Europe	Both	45-49 years	Caries of permanent teeth	Rate	2021	44024.5	54950.9	32397.9
397	Prevalence	Western Europe	Both	50-54 years	Caries of permanent teeth	Rate	1990	48258	61120.5	31937.5
398	Prevalence	Western Europe	Both	50-54 years	Caries of permanent teeth	Rate	2021	44334.1	54617.8	32201.2
399	Prevalence	Western Europe	Both	55-59 years	Caries of permanent teeth	Rate	1990	48926.4	61068	35940
400	Prevalence	Western Europe	Both	55-59 years	Caries of permanent teeth	Rate	2021	44122	53474.2	34314.8
401	Prevalence	Western Europe	Both	60-64 years	Caries of permanent teeth	Rate	1990	48539.2	59893.1	38153.1
402	Prevalence	Western Europe	Both	60-64 years	Caries of permanent teeth	Rate	2021	43780.9	52886.3	35204.6
403	Prevalence	Western Europe	Both	65-69 years	Caries of permanent teeth	Rate	1990	47636.2	57138.2	37242.2
404	Prevalence	Southern Latin America	Both	5-9 years	Caries of permanent teeth	Rate	1990	16499.8	27089.4	7926.7
405	Prevalence	Southern Latin America	Both	5-9 years	Caries of permanent teeth	Rate	2021	15755.2	26048.6	7573.99
406	Prevalence	Southern Latin America	Both	10-14 years	Caries of permanent teeth	Rate	1990	37780.8	52609.3	24507.3
407	Prevalence	Southern Latin America	Both	10-14 years	Caries of permanent teeth	Rate	2021	37365.6	51006.4	24432.1
408	Prevalence	Southern Latin America	Both	15-19 years	Caries of permanent teeth	Rate	1990	36744.8	52371.2	23194.4
409	Prevalence	Southern Latin America	Both	15-19 years	Caries of permanent teeth	Rate	2021	36233	47856.3	25730.4
410	Prevalence	Southern Latin America	Both	25-29 years	Caries of permanent teeth	Rate	1990	51782	69949.6	35347.1
411	Prevalence	Southern Latin America	Both	25-29 years	Caries of permanent teeth	Rate	2021	52890.1	65905.2	40422.5
412	Prevalence	Southern Latin America	Both	30-34 years	Caries of permanent teeth	Rate	1990	53959.4	69924.1	39319.2
413	Prevalence	Southern Latin America	Both	30-34 years	Caries of permanent teeth	Rate	2021	55421.3	67267.8	44263.7
414	Prevalence	Southern Latin America	Both	35-39 years	Caries of permanent teeth	Rate	1990	55731.4	70254.4	38098.9
415	Prevalence	Southern Latin America	Both	35-39 years	Caries of permanent teeth	Rate	2021	56751.1	67190.3	43544.4
416	Prevalence	Southern Latin America	Both	40-44 years	Caries of permanent teeth	Rate	1990	56205.5	70164.4	38585.9
417	Prevalence	Southern Latin America	Both	40-44 years	Caries of permanent teeth	Rate	2021	56694.4	67026.4	42712.2
418	Prevalence	Southern Latin America	Both	45-49 years	Caries of permanent teeth	Rate	1990	56063	68920.9	39706.1
419	Prevalence	Southern Latin America	Both	45-49 years	Caries of permanent teeth	Rate	2021	57255.2	66707.2	45386
420	Prevalence	Southern Latin America	Both	50-54 years	Caries of permanent teeth	Rate	1990	55391	68647.2	36366.6
421	Prevalence	Southern Latin America	Both	50-54 years	Caries of permanent teeth	Rate	2021	57148.1	67162.2	44095.4
422	Prevalence	Southern Latin America	Both	55-59 years	Caries of permanent teeth	Rate	1990	54639	68122.4	39610.3
423	Prevalence	Southern Latin America	Both	55-59 years	Caries of permanent teeth	Rate	2021	56049.9	65695.1	46232.5
424	Prevalence	Southern Latin America	Both	60-64 years	Caries of permanent teeth	Rate	1990	54364.9	67397.5	41613.5
425	Prevalence	Southern Latin America	Both	60-64 years	Caries of permanent teeth	Rate	2021	55677.6	64271	47344.4
426	Prevalence	Southern Latin America	Both	65-69 years	Caries of permanent teeth	Rate	1990	53990.1	65036.7	41358.6
427	Prevalence	High-income North America	Both	5-9 years	Caries of permanent teeth	Rate	1990	4858.6	9358.31	1982.08
428	Prevalence	High-income North America	Both	5-9 years	Caries of permanent teeth	Rate	2021	4204.03	8008.4	1978.5
429	Prevalence	High-income North America	Both	10-14 years	Caries of permanent teeth	Rate	1990	21532.7	32778.4	12822.1
430	Prevalence	High-income North America	Both	10-14 years	Caries of permanent teeth	Rate	2021	15849.1	25329.5	9450.18
431	Prevalence	High-income North America	Both	15-19 years	Caries of permanent teeth	Rate	1990	25549.5	36311.5	16639
432	Prevalence	High-income North America	Both	15-19 years	Caries of permanent teeth	Rate	2021	22583	31359.7	15342
433	Prevalence	High-income North America	Both	25-29 years	Caries of permanent teeth	Rate	1990	30811.7	44994.8	22306.3
434	Prevalence	High-income North America	Both	25-29 years	Caries of permanent teeth	Rate	2021	30092.7	43054.2	22557.7
435	Prevalence	High-income North America	Both	30-34 years	Caries of permanent teeth	Rate	1990	27564.6	39897.8	19263.9
436	Prevalence	High-income North America	Both	30-34 years	Caries of permanent teeth	Rate	2021	26759.4	37956.4	19408.4
437	Prevalence	High-income North America	Both	35-39 years	Caries of permanent teeth	Rate	1990	26270	38894.8	16475.8
438	Prevalence	High-income North America	Both	35-39 years	Caries of permanent teeth	Rate	2021	25561.2	37451.3	17095
439	Prevalence	High-income North America	Both	40-44 years	Caries of permanent teeth	Rate	1990	24550.8	36940.3	15648.8
440	Prevalence	High-income North America	Both	40-44 years	Caries of permanent teeth	Rate	2021	24107.4	35281.7	16156
441	Prevalence	High-income North America	Both	45-49 years	Caries of permanent teeth	Rate	1990	22874.1	33531.5	14682.2
442	Prevalence	High-income North America	Both	45-49 years	Caries of permanent teeth	Rate	2021	22730.7	31851.8	15531.4
443	Prevalence	High-income North America	Both	50-54 years	Caries of permanent teeth	Rate	1990	21971.5	33373	13584.8
444	Prevalence	High-income North America	Both	50-54 years	Caries of permanent teeth	Rate	2021	22040.2	32143.6	14485.2
445	Prevalence	High-income North America	Both	55-59 years	Caries of permanent teeth	Rate	1990	20880.7	32217.7	12742.8
446	Prevalence	High-income North America	Both	55-59 years	Caries of permanent teeth	Rate	2021	21117.3	31223.8	13713.6
447	Prevalence	High-income North America	Both	60-64 years	Caries of permanent teeth	Rate	1990	20389.9	30205	13189
448	Prevalence	High-income North America	Both	60-64 years	Caries of permanent teeth	Rate	2021	20631.6	29923.7	14029.8
449	Prevalence	High-income North America	Both	65-69 years	Caries of permanent teeth	Rate	1990	20805.5	28808.7	14094.4
450	Prevalence	Caribbean	Both	5-9 years	Caries of permanent teeth	Rate	1990	13470.4	23050.2	6205.73
451	Prevalence	Caribbean	Both	5-9 years	Caries of permanent teeth	Rate	2021	14328.6	20513.1	8730.34
452	Prevalence	Caribbean	Both	10-14 years	Caries of permanent teeth	Rate	1990	31418.3	43308.1	19729
453	Prevalence	Caribbean	Both	10-14 years	Caries of permanent teeth	Rate	2021	30801	39701.5	21988.6
454	Prevalence	Caribbean	Both	15-19 years	Caries of permanent teeth	Rate	1990	37016.1	51938.4	22969.8
455	Prevalence	Caribbean	Both	15-19 years	Caries of permanent teeth	Rate	2021	34563.9	44553.4	24772.3
456	Prevalence	Caribbean	Both	25-29 years	Caries of permanent teeth	Rate	1990	53673.7	70334.3	36597.5
457	Prevalence	Caribbean	Both	25-29 years	Caries of permanent teeth	Rate	2021	49127.5	61262.4	37317.3
458	Prevalence	Caribbean	Both	30-34 years	Caries of permanent teeth	Rate	1990	52617.3	67998.6	38585.3
459	Prevalence	Caribbean	Both	30-34 years	Caries of permanent teeth	Rate	2021	47984.8	59288.4	37836.7
460	Prevalence	Caribbean	Both	35-39 years	Caries of permanent teeth	Rate	1990	51790.8	66944.1	35692.6
461	Prevalence	Caribbean	Both	35-39 years	Caries of permanent teeth	Rate	2021	48016.9	59561.3	36284.9
462	Prevalence	Caribbean	Both	40-44 years	Caries of permanent teeth	Rate	1990	51083.9	65573.7	34225.6
463	Prevalence	Caribbean	Both	40-44 years	Caries of permanent teeth	Rate	2021	47542.7	59068	35363.6
464	Prevalence	Caribbean	Both	45-49 years	Caries of permanent teeth	Rate	1990	50473.7	63982.2	35249.4
465	Prevalence	Caribbean	Both	45-49 years	Caries of permanent teeth	Rate	2021	47498.8	58456.8	35196.5
466	Prevalence	Caribbean	Both	50-54 years	Caries of permanent teeth	Rate	1990	49023	65296.6	31646.3
467	Prevalence	Caribbean	Both	50-54 years	Caries of permanent teeth	Rate	2021	46277	59279.2	32287.5
468	Prevalence	Caribbean	Both	55-59 years	Caries of permanent teeth	Rate	1990	45684.3	61939.1	30407.8
469	Prevalence	Caribbean	Both	55-59 years	Caries of permanent teeth	Rate	2021	43323.1	56504	31822.5
470	Prevalence	Caribbean	Both	60-64 years	Caries of permanent teeth	Rate	1990	41480.7	55880.7	30275.6
471	Prevalence	Caribbean	Both	60-64 years	Caries of permanent teeth	Rate	2021	38915.9	49589.8	30594.9
472	Prevalence	Caribbean	Both	65-69 years	Caries of permanent teeth	Rate	1990	37441.1	49207.7	26631.4
473	Prevalence	Central Latin America	Both	5-9 years	Caries of permanent teeth	Rate	1990	8234.14	14959.1	3558.73
474	Prevalence	Central Latin America	Both	5-9 years	Caries of permanent teeth	Rate	2021	7581.13	13800.9	3198.1
475	Prevalence	Central Latin America	Both	10-14 years	Caries of permanent teeth	Rate	1990	25310.4	37398.8	15236.2
476	Prevalence	Central Latin America	Both	10-14 years	Caries of permanent teeth	Rate	2021	21590	32357.8	12750.9
477	Prevalence	Central Latin America	Both	15-19 years	Caries of permanent teeth	Rate	1990	30922	43977.4	20218.1
478	Prevalence	Central Latin America	Both	15-19 years	Caries of permanent teeth	Rate	2021	27916.6	39874.7	18221.5
479	Prevalence	Central Latin America	Both	25-29 years	Caries of permanent teeth	Rate	1990	40958.1	59164.8	28545.4
480	Prevalence	Central Latin America	Both	25-29 years	Caries of permanent teeth	Rate	2021	39895.2	57683.9	28248.6
481	Prevalence	Central Latin America	Both	30-34 years	Caries of permanent teeth	Rate	1990	39851.9	56512.5	28305.5
482	Prevalence	Central Latin America	Both	30-34 years	Caries of permanent teeth	Rate	2021	38916.4	55199.1	27817.9
483	Prevalence	Central Latin America	Both	35-39 years	Caries of permanent teeth	Rate	1990	41079.8	56206.4	25837.9
484	Prevalence	Central Latin America	Both	35-39 years	Caries of permanent teeth	Rate	2021	39947.7	54860.3	25409.4
485	Prevalence	Central Latin America	Both	40-44 years	Caries of permanent teeth	Rate	1990	41375.7	56080	26572.5
486	Prevalence	Central Latin America	Both	40-44 years	Caries of permanent teeth	Rate	2021	40379.1	54609	26731.1
487	Prevalence	Central Latin America	Both	45-49 years	Caries of permanent teeth	Rate	1990	40584.1	54111.3	27766
488	Prevalence	Central Latin America	Both	45-49 years	Caries of permanent teeth	Rate	2021	39631.1	52829.5	27102
489	Prevalence	Central Latin America	Both	50-54 years	Caries of permanent teeth	Rate	1990	39693.8	54214	24819.6
490	Prevalence	Central Latin America	Both	50-54 years	Caries of permanent teeth	Rate	2021	39060.8	53129.8	24921.9
491	Prevalence	Central Latin America	Both	55-59 years	Caries of permanent teeth	Rate	1990	38321.6	52545.7	25872.5
492	Prevalence	Central Latin America	Both	55-59 years	Caries of permanent teeth	Rate	2021	37831.9	51424.6	25522.8
493	Prevalence	Central Latin America	Both	60-64 years	Caries of permanent teeth	Rate	1990	37406.3	50688	27368
494	Prevalence	Central Latin America	Both	60-64 years	Caries of permanent teeth	Rate	2021	36762.4	49839	26829.7
495	Prevalence	Central Latin America	Both	65-69 years	Caries of permanent teeth	Rate	1990	36477.1	46254.2	26829
496	Prevalence	North Africa and Middle East	Both	5-9 years	Caries of permanent teeth	Rate	1990	16001.1	25459.5	8203.32
497	Prevalence	North Africa and Middle East	Both	5-9 years	Caries of permanent teeth	Rate	2021	15547.2	25016.2	7936.1
498	Prevalence	North Africa and Middle East	Both	10-14 years	Caries of permanent teeth	Rate	1990	34586.2	47622.1	22116.8
499	Prevalence	North Africa and Middle East	Both	10-14 years	Caries of permanent teeth	Rate	2021	32683.7	45439.3	20971.6
500	Prevalence	North Africa and Middle East	Both	15-19 years	Caries of permanent teeth	Rate	1990	36634.1	52468.8	24797.6
501	Prevalence	North Africa and Middle East	Both	15-19 years	Caries of permanent teeth	Rate	2021	34566.1	49838.9	22716.3
502	Prevalence	North Africa and Middle East	Both	25-29 years	Caries of permanent teeth	Rate	1990	44346.6	62126.3	30310.1
503	Prevalence	North Africa and Middle East	Both	25-29 years	Caries of permanent teeth	Rate	2021	42662.2	59952.8	29707.4
504	Prevalence	North Africa and Middle East	Both	30-34 years	Caries of permanent teeth	Rate	1990	43386.2	59698.6	31012.4
505	Prevalence	North Africa and Middle East	Both	30-34 years	Caries of permanent teeth	Rate	2021	41615.9	56994.8	29808.5
506	Prevalence	North Africa and Middle East	Both	35-39 years	Caries of permanent teeth	Rate	1990	45928.7	59876.5	30771.5
507	Prevalence	North Africa and Middle East	Both	35-39 years	Caries of permanent teeth	Rate	2021	44168.8	57864.5	29124.5
508	Prevalence	North Africa and Middle East	Both	40-44 years	Caries of permanent teeth	Rate	1990	46697.5	60262.4	31634.4
509	Prevalence	North Africa and Middle East	Both	40-44 years	Caries of permanent teeth	Rate	2021	45031.5	58694.6	30606.7
510	Prevalence	North Africa and Middle East	Both	45-49 years	Caries of permanent teeth	Rate	1990	45050.4	58560.2	31359
511	Prevalence	North Africa and Middle East	Both	45-49 years	Caries of permanent teeth	Rate	2021	43570.1	57059.9	30730.9
512	Prevalence	North Africa and Middle East	Both	50-54 years	Caries of permanent teeth	Rate	1990	42868.5	57191.3	27663.6
513	Prevalence	North Africa and Middle East	Both	50-54 years	Caries of permanent teeth	Rate	2021	41090.3	55320.3	26311.7
514	Prevalence	North Africa and Middle East	Both	55-59 years	Caries of permanent teeth	Rate	1990	42189.3	56331.9	29188.1
515	Prevalence	North Africa and Middle East	Both	55-59 years	Caries of permanent teeth	Rate	2021	39993.5	53342.6	27539.9
516	Prevalence	North Africa and Middle East	Both	60-64 years	Caries of permanent teeth	Rate	1990	43013.2	56411.9	32449.6
517	Prevalence	North Africa and Middle East	Both	60-64 years	Caries of permanent teeth	Rate	2021	40492.8	52416.3	30727
518	Prevalence	North Africa and Middle East	Both	65-69 years	Caries of permanent teeth	Rate	1990	44083.1	53983.3	33854.4
519	Prevalence	Tropical Latin America	Both	5-9 years	Caries of permanent teeth	Rate	1990	14806.3	23239.9	7374.64
520	Prevalence	Tropical Latin America	Both	5-9 years	Caries of permanent teeth	Rate	2021	11127.2	19574.6	4911.57
521	Prevalence	Tropical Latin America	Both	10-14 years	Caries of permanent teeth	Rate	1990	28996.9	40929.5	18305.1
522	Prevalence	Tropical Latin America	Both	10-14 years	Caries of permanent teeth	Rate	2021	26876	38141.6	17012.2
523	Prevalence	Tropical Latin America	Both	15-19 years	Caries of permanent teeth	Rate	1990	32056.2	45938.5	19833.9
524	Prevalence	Tropical Latin America	Both	15-19 years	Caries of permanent teeth	Rate	2021	31006.5	43711.3	19782.4
525	Prevalence	Tropical Latin America	Both	25-29 years	Caries of permanent teeth	Rate	1990	41011	59722	28421.9
526	Prevalence	Tropical Latin America	Both	25-29 years	Caries of permanent teeth	Rate	2021	40516.7	58507.4	28333
527	Prevalence	Tropical Latin America	Both	30-34 years	Caries of permanent teeth	Rate	1990	39459.1	56683.9	27871.3
528	Prevalence	Tropical Latin America	Both	30-34 years	Caries of permanent teeth	Rate	2021	39415.9	56205.7	28186.7
529	Prevalence	Tropical Latin America	Both	35-39 years	Caries of permanent teeth	Rate	1990	40306.5	55965.2	25837.3
530	Prevalence	Tropical Latin America	Both	35-39 years	Caries of permanent teeth	Rate	2021	40344.5	56220.4	26227.8
531	Prevalence	Tropical Latin America	Both	40-44 years	Caries of permanent teeth	Rate	1990	40443.3	55440.7	25878.5
532	Prevalence	Tropical Latin America	Both	40-44 years	Caries of permanent teeth	Rate	2021	40557.6	55186.7	26234.4
533	Prevalence	Tropical Latin America	Both	45-49 years	Caries of permanent teeth	Rate	1990	39964.4	54618.2	26135.8
534	Prevalence	Tropical Latin America	Both	45-49 years	Caries of permanent teeth	Rate	2021	40382.7	54380.7	26684.6
535	Prevalence	Tropical Latin America	Both	50-54 years	Caries of permanent teeth	Rate	1990	39815.3	55905	24630.8
536	Prevalence	Tropical Latin America	Both	50-54 years	Caries of permanent teeth	Rate	2021	40603.6	56632.7	25549
537	Prevalence	Tropical Latin America	Both	55-59 years	Caries of permanent teeth	Rate	1990	39569.5	55452.3	25953.8
538	Prevalence	Tropical Latin America	Both	55-59 years	Caries of permanent teeth	Rate	2021	40778.6	56629.3	26757.1
539	Prevalence	Tropical Latin America	Both	60-64 years	Caries of permanent teeth	Rate	1990	39727.2	54195	28816.5
540	Prevalence	Tropical Latin America	Both	60-64 years	Caries of permanent teeth	Rate	2021	41251.6	55033.7	29664.1
541	Prevalence	Tropical Latin America	Both	65-69 years	Caries of permanent teeth	Rate	1990	40175.6	51797.8	29421.3
542	Prevalence	Eastern Europe	Both	65-69 years	Caries of permanent teeth	Rate	2021	35498.3	45857.9	25768.1
543	Prevalence	Eastern Europe	Both	70+ years	Caries of permanent teeth	Rate	1990	28484.9	36539.5	21374.4
544	Prevalence	Eastern Europe	Both	70+ years	Caries of permanent teeth	Rate	2021	28633.2	35941.4	21758.4
545	Prevalence	High-income Asia Pacific	Both	65-69 years	Caries of permanent teeth	Rate	2021	9723.42	12887.4	6994.11
546	Prevalence	High-income Asia Pacific	Both	70+ years	Caries of permanent teeth	Rate	1990	9883.4	12821.8	7210.8
547	Prevalence	High-income Asia Pacific	Both	70+ years	Caries of permanent teeth	Rate	2021	7497.41	9581.24	5770.6
548	Prevalence	Australasia	Both	65-69 years	Caries of permanent teeth	Rate	2021	31037.1	41741.8	21774.6
549	Prevalence	Australasia	Both	70+ years	Caries of permanent teeth	Rate	1990	33041.2	40227.2	25922.8
550	Prevalence	Australasia	Both	70+ years	Caries of permanent teeth	Rate	2021	28745.5	37047.7	21117.2
551	Prevalence	Western Europe	Both	65-69 years	Caries of permanent teeth	Rate	2021	43179.3	50593.6	34612.2
552	Prevalence	Western Europe	Both	70+ years	Caries of permanent teeth	Rate	1990	41820.7	50045.5	33388.1
553	Prevalence	Western Europe	Both	70+ years	Caries of permanent teeth	Rate	2021	37272.4	42995.1	31305.3
554	Prevalence	South Asia	Both	5-9 years	Caries of permanent teeth	Rate	1990	6571.27	11801	3132.45
555	Prevalence	South Asia	Both	5-9 years	Caries of permanent teeth	Rate	2021	6193.52	10971.4	3200.75
556	Prevalence	South Asia	Both	10-14 years	Caries of permanent teeth	Rate	1990	25115.4	38223.8	15833.9
557	Prevalence	South Asia	Both	10-14 years	Caries of permanent teeth	Rate	2021	24738.9	36271.4	15948.9
558	Prevalence	South Asia	Both	15-19 years	Caries of permanent teeth	Rate	1990	32880.6	46193.5	22058.5
559	Prevalence	South Asia	Both	15-19 years	Caries of permanent teeth	Rate	2021	32375.1	44543.6	22091.6
560	Prevalence	South Asia	Both	25-29 years	Caries of permanent teeth	Rate	1990	40631.3	57763.3	29061.4
561	Prevalence	South Asia	Both	25-29 years	Caries of permanent teeth	Rate	2021	37927.6	53910.2	27888.1
562	Prevalence	South Asia	Both	30-34 years	Caries of permanent teeth	Rate	1990	39325.4	54650.1	28706
563	Prevalence	South Asia	Both	30-34 years	Caries of permanent teeth	Rate	2021	36189.4	50181.5	26782.7
564	Prevalence	South Asia	Both	35-39 years	Caries of permanent teeth	Rate	1990	41626.7	55529.5	28250.7
565	Prevalence	South Asia	Both	35-39 years	Caries of permanent teeth	Rate	2021	38169.8	51651	26118.1
566	Prevalence	South Asia	Both	40-44 years	Caries of permanent teeth	Rate	1990	43337.4	56375.2	29071.8
567	Prevalence	South Asia	Both	40-44 years	Caries of permanent teeth	Rate	2021	39786.6	52941.9	27216.7
568	Prevalence	South Asia	Both	45-49 years	Caries of permanent teeth	Rate	1990	44268.3	57223.7	31512.5
569	Prevalence	South Asia	Both	45-49 years	Caries of permanent teeth	Rate	2021	41000.9	53055.1	29384.6
570	Prevalence	South Asia	Both	50-54 years	Caries of permanent teeth	Rate	1990	45111.7	58087.5	30087.7
571	Prevalence	South Asia	Both	50-54 years	Caries of permanent teeth	Rate	2021	42166.6	55028.4	28765.1
572	Prevalence	South Asia	Both	55-59 years	Caries of permanent teeth	Rate	1990	46103.5	58977.6	33879.1
573	Prevalence	South Asia	Both	55-59 years	Caries of permanent teeth	Rate	2021	43241.3	55294.6	31659.2
574	Prevalence	South Asia	Both	60-64 years	Caries of permanent teeth	Rate	1990	46961.6	59141.4	36672.4
575	Prevalence	South Asia	Both	60-64 years	Caries of permanent teeth	Rate	2021	44211.9	56279.4	34104
576	Prevalence	South Asia	Both	65-69 years	Caries of permanent teeth	Rate	1990	47210.1	56381.2	37507.9
577	Prevalence	Southern Latin America	Both	65-69 years	Caries of permanent teeth	Rate	2021	55622.8	63339.6	47159
578	Prevalence	Southern Latin America	Both	70+ years	Caries of permanent teeth	Rate	1990	49714	59118.6	38521.5
579	Prevalence	Southern Latin America	Both	70+ years	Caries of permanent teeth	Rate	2021	50674.5	56927.6	43228.9
580	Prevalence	Central Latin America	Both	65-69 years	Caries of permanent teeth	Rate	2021	35871.8	45644	25700.1
581	Prevalence	Central Latin America	Both	70+ years	Caries of permanent teeth	Rate	1990	33007.5	40834.3	24701.9
582	Prevalence	Central Latin America	Both	70+ years	Caries of permanent teeth	Rate	2021	31983.9	39827.9	24262.5
583	Prevalence	Tropical Latin America	Both	65-69 years	Caries of permanent teeth	Rate	2021	41744.5	52418.1	30784.6
584	Prevalence	Tropical Latin America	Both	70+ years	Caries of permanent teeth	Rate	1990	37702.1	47048.8	27920.8
585	Prevalence	Tropical Latin America	Both	70+ years	Caries of permanent teeth	Rate	2021	38526	46896.8	29317
586	Prevalence	North Africa and Middle East	Both	65-69 years	Caries of permanent teeth	Rate	2021	41894.2	51412.2	31986.3
587	Prevalence	North Africa and Middle East	Both	70+ years	Caries of permanent teeth	Rate	1990	41940.2	50411.7	32520.9
588	Prevalence	North Africa and Middle East	Both	70+ years	Caries of permanent teeth	Rate	2021	39521.3	47443.5	31122.5
