# Supplementary material for: Global, Regional, and National Levels and Trends in Burden of Dental Caries and Periodontal Disease from 1990 to 2035：Result From the Global Burden of Disease Study 2021
Source: Research Square preprint supplement (doi:10.21203/rs.3.rs-5609270/v1), 2025-04-02
Supplement: Supplementary file 5 [file 18b226a846f677c2c6aca4f5.xlsx]

## Sheet: Sheet1
Exported data
	measure_id	measure_name	location_id	location_name	sex_id	sex_name	age_id	age_name	cause_id	cause_name	metric_id	metric_name	year_start	year_end	val	upper	lower
1	5	Prevalence	42	Central Europe	3	Both	27	Age-standardized	683	Periodontal diseases	3	Rate	1990	2021	10.3603	61.2572	-23.5833
2	5	Prevalence	9	Southeast Asia	3	Both	27	Age-standardized	683	Periodontal diseases	3	Rate	1990	2021	-8.62838	7.38798	-20.0993
3	5	Prevalence	7	Democratic People's Republic of Korea	3	Both	27	Age-standardized	683	Periodontal diseases	3	Rate	1990	2021	-11.0944	-5.62527	-16.2582
4	5	Prevalence	1	Global	3	Both	27	Age-standardized	683	Periodontal diseases	3	Rate	1990	2021	1.75747	26.6389	-15.5536
5	5	Prevalence	31	Central Europe, Eastern Europe, and Central Asia	3	Both	27	Age-standardized	683	Periodontal diseases	3	Rate	1990	2021	-3.77629	40.3495	-32.0031
6	5	Prevalence	18	Kingdom of Thailand	3	Both	27	Age-standardized	683	Periodontal diseases	3	Rate	1990	2021	16.5197	60.8212	-16.2857
7	5	Prevalence	20	Socialist Republic of Viet Nam	3	Both	27	Age-standardized	683	Periodontal diseases	3	Rate	1990	2021	28.4407	107.733	-16.5665
8	5	Prevalence	106	Commonwealth of the Bahamas	3	Both	27	Age-standardized	683	Periodontal diseases	3	Rate	1990	2021	-10.2567	17.4373	-32.0926
9	5	Prevalence	62	Russian Federation	3	Both	27	Age-standardized	683	Periodontal diseases	3	Rate	1990	2021	-7.91794	34.6432	-34.0314
10	5	Prevalence	5	East Asia	3	Both	27	Age-standardized	683	Periodontal diseases	3	Rate	1990	2021	-2.44911	13.6966	-13.0821
11	5	Prevalence	29	Kingdom of Tonga	3	Both	27	Age-standardized	683	Periodontal diseases	3	Rate	1990	2021	-77.1624	-65.1032	-85.2841
12	5	Prevalence	40	Turkmenistan	3	Both	27	Age-standardized	683	Periodontal diseases	3	Rate	1990	2021	-1.81571	45.4693	-31.9874
13	5	Prevalence	95	United Kingdom of Great Britain and Northern Ireland	3	Both	27	Age-standardized	683	Periodontal diseases	3	Rate	1990	2021	-10.1061	30.8123	-35.1084
14	5	Prevalence	104	Caribbean	3	Both	27	Age-standardized	683	Periodontal diseases	3	Rate	1990	2021	-9.82021	26.1	-33.0703
15	5	Prevalence	27	Independent State of Samoa	3	Both	27	Age-standardized	683	Periodontal diseases	3	Rate	1990	2021	-77.4181	-65.3572	-85.4985
16	5	Prevalence	51	Republic of Poland	3	Both	27	Age-standardized	683	Periodontal diseases	3	Rate	1990	2021	6.58949	54.8101	-24.007
17	5	Prevalence	60	Republic of Lithuania	3	Both	27	Age-standardized	683	Periodontal diseases	3	Rate	1990	2021	2.53292	49.6634	-26.9844
18	5	Prevalence	73	Western Europe	3	Both	27	Age-standardized	683	Periodontal diseases	3	Rate	1990	2021	-12.1262	18.4205	-35.1067
19	5	Prevalence	71	Australia	3	Both	27	Age-standardized	683	Periodontal diseases	3	Rate	1990	2021	15.8814	82.8395	-24.5742
20	5	Prevalence	84	Ireland	3	Both	27	Age-standardized	683	Periodontal diseases	3	Rate	1990	2021	11.377	81.3859	-30.5438
21	5	Prevalence	170	Congo	3	Both	27	Age-standardized	683	Periodontal diseases	3	Rate	1990	2021	-37.37	-12.0525	-56.1037
22	5	Prevalence	82	Hellenic Republic	3	Both	27	Age-standardized	683	Periodontal diseases	3	Rate	1990	2021	-0.280031	52.0139	-35.5259
23	5	Prevalence	38	Mongolia	3	Both	27	Age-standardized	683	Periodontal diseases	3	Rate	1990	2021	2.98479	55.8547	-32.4108
24	5	Prevalence	16	Republic of the Philippines	3	Both	27	Age-standardized	683	Periodontal diseases	3	Rate	1990	2021	-65.3557	-56.5784	-71.3924
25	5	Prevalence	93	Kingdom of Sweden	3	Both	27	Age-standardized	683	Periodontal diseases	3	Rate	1990	2021	-13.834	24.4459	-39.9353
26	5	Prevalence	49	North Macedonia	3	Both	27	Age-standardized	683	Periodontal diseases	3	Rate	1990	2021	7.34901	64.3874	-29.532
27	5	Prevalence	159	South Asia	3	Both	27	Age-standardized	683	Periodontal diseases	3	Rate	1990	2021	7.62228	33.2096	-11.2242
28	5	Prevalence	25	Federated States of Micronesia	3	Both	27	Age-standardized	683	Periodontal diseases	3	Rate	1990	2021	-78.6538	-66.5988	-86.5399
29	5	Prevalence	168	Angola	3	Both	27	Age-standardized	683	Periodontal diseases	3	Rate	1990	2021	-34.2514	-6.63038	-53.5147
30	5	Prevalence	102	United States of America	3	Both	27	Age-standardized	683	Periodontal diseases	3	Rate	1990	2021	-6.63101	14.2685	-21.646
31	5	Prevalence	157	Yemen	3	Both	27	Age-standardized	683	Periodontal diseases	3	Rate	1990	2021	6.13	54.198	-27.9459
32	5	Prevalence	14	Republic of Maldives	3	Both	27	Age-standardized	683	Periodontal diseases	3	Rate	1990	2021	-29.4422	3.48817	-52.8932
33	5	Prevalence	56	Eastern Europe	3	Both	27	Age-standardized	683	Periodontal diseases	3	Rate	1990	2021	-7.99911	34.7303	-34.6052
34	5	Prevalence	148	Morocco	3	Both	27	Age-standardized	683	Periodontal diseases	3	Rate	1990	2021	-3.25708	33.5671	-29.3549
35	5	Prevalence	69	Republic of Singapore	3	Both	27	Age-standardized	683	Periodontal diseases	3	Rate	1990	2021	5.82699	55.2593	-27.6428
36	5	Prevalence	124	Central Latin America	3	Both	27	Age-standardized	683	Periodontal diseases	3	Rate	1990	2021	-1.09243	29.8737	-21.5529
37	5	Prevalence	135	Federative Republic of Brazil	3	Both	27	Age-standardized	683	Periodontal diseases	3	Rate	1990	2021	14.7286	26.2854	4.97644
38	5	Prevalence	91	Portuguese Republic	3	Both	27	Age-standardized	683	Periodontal diseases	3	Rate	1990	2021	-9.03068	41.5076	-40.2571
39	5	Prevalence	58	Republic of Estonia	3	Both	27	Age-standardized	683	Periodontal diseases	3	Rate	1990	2021	3.87122	52.9735	-25.9687
40	5	Prevalence	146	Lebanon	3	Both	27	Age-standardized	683	Periodontal diseases	3	Rate	1990	2021	12.7501	67.6596	-21.4618
41	5	Prevalence	137	North Africa and Middle East	3	Both	27	Age-standardized	683	Periodontal diseases	3	Rate	1990	2021	20.8646	67.0123	-10.7934
42	5	Prevalence	126	Republic of Costa Rica	3	Both	27	Age-standardized	683	Periodontal diseases	3	Rate	1990	2021	1.88792	42.318	-23.9229
43	5	Prevalence	166	Sub-Saharan Africa	3	Both	27	Age-standardized	683	Periodontal diseases	3	Rate	1990	2021	-35.1176	-20.3763	-45.9418
44	5	Prevalence	45	Republic of Bulgaria	3	Both	27	Age-standardized	683	Periodontal diseases	3	Rate	1990	2021	5.2914	66.9016	-32.9213
45	5	Prevalence	80	French Republic	3	Both	27	Age-standardized	683	Periodontal diseases	3	Rate	1990	2021	8.11108	31.7817	-17.4457
46	5	Prevalence	23	Republic of Kiribati	3	Both	27	Age-standardized	683	Periodontal diseases	3	Rate	1990	2021	-79.9846	-68.9075	-87.5023
47	5	Prevalence	12	Lao People's Democratic Republic	3	Both	27	Age-standardized	683	Periodontal diseases	3	Rate	1990	2021	44.1437	52.4233	35.9998
48	5	Prevalence	89	Kingdom of the Netherlands	3	Both	27	Age-standardized	683	Periodontal diseases	3	Rate	1990	2021	-11.0434	36.8716	-42.272
49	5	Prevalence	113	Republic of Guyana	3	Both	27	Age-standardized	683	Periodontal diseases	3	Rate	1990	2021	-1.31181	40.4336	-29.6069
50	5	Prevalence	115	Jamaica	3	Both	27	Age-standardized	683	Periodontal diseases	3	Rate	1990	2021	-7.98826	27.8884	-33.8389
51	5	Prevalence	122	Republic of Ecuador	3	Both	27	Age-standardized	683	Periodontal diseases	3	Rate	1990	2021	-1.6337	17.3268	-19.6276
52	5	Prevalence	78	Kingdom of Denmark	3	Both	27	Age-standardized	683	Periodontal diseases	3	Rate	1990	2021	-5.32694	14.6755	-23.7645
53	5	Prevalence	47	Czech Republic	3	Both	27	Age-standardized	683	Periodontal diseases	3	Rate	1990	2021	5.58202	57.1081	-29.6284
54	5	Prevalence	34	Republic of Azerbaijan	3	Both	27	Age-standardized	683	Periodontal diseases	3	Rate	1990	2021	-5.17735	38.3834	-35.0487
55	5	Prevalence	244	South Asia - WB	3	Both	27	Age-standardized	683	Periodontal diseases	3	Rate	1990	2021	6.58538	32.1708	-12.1416
56	5	Prevalence	155	Turkey	3	Both	27	Age-standardized	683	Periodontal diseases	3	Rate	1990	2021	106.303	224.098	39.6315
57	5	Prevalence	144	Hashemite Kingdom of Jordan	3	Both	27	Age-standardized	683	Periodontal diseases	3	Rate	1990	2021	12.264	67.489	-23.2167
58	5	Prevalence	109	Republic of Cuba	3	Both	27	Age-standardized	683	Periodontal diseases	3	Rate	1990	2021	-10.7414	23.6152	-34.3334
59	5	Prevalence	36	Republic of Kazakhstan	3	Both	27	Age-standardized	683	Periodontal diseases	3	Rate	1990	2021	-2.88517	42.6773	-33.1806
60	5	Prevalence	133	Bolivarian Republic of Venezuela	3	Both	27	Age-standardized	683	Periodontal diseases	3	Rate	1990	2021	-6.7909	28.5185	-30.8128
61	5	Prevalence	98	Republic of Chile	3	Both	27	Age-standardized	683	Periodontal diseases	3	Rate	1990	2021	13.2615	62.2674	-17.0945
62	5	Prevalence	100	High-income North America	3	Both	27	Age-standardized	683	Periodontal diseases	3	Rate	1990	2021	-5.76143	17.6495	-21.6922
63	5	Prevalence	67	Japan	3	Both	27	Age-standardized	683	Periodontal diseases	3	Rate	1990	2021	1.92161	52.7016	-30.0426
64	5	Prevalence	111	Dominican Republic	3	Both	27	Age-standardized	683	Periodontal diseases	3	Rate	1990	2021	-0.0767985	39.411	-26.2833
65	5	Prevalence	6	People's Republic of China	3	Both	27	Age-standardized	683	Periodontal diseases	3	Rate	1990	2021	-2.50896	14.0896	-13.4486
66	5	Prevalence	43	Republic of Albania	3	Both	27	Age-standardized	683	Periodontal diseases	3	Rate	1990	2021	17.345	84.3147	-23.5037
67	5	Prevalence	153	Syrian Arab Republic	3	Both	27	Age-standardized	683	Periodontal diseases	3	Rate	1990	2021	10.7402	66.4453	-25.141
68	5	Prevalence	131	Republic of Nicaragua	3	Both	27	Age-standardized	683	Periodontal diseases	3	Rate	1990	2021	-0.702268	43.4253	-28.9877
69	5	Prevalence	10	Kingdom of Cambodia	3	Both	27	Age-standardized	683	Periodontal diseases	3	Rate	1990	2021	23.6509	31.4318	14.9807
70	5	Prevalence	164	Nepal	3	Both	27	Age-standardized	683	Periodontal diseases	3	Rate	1990	2021	8.16515	65.7609	-27.4623
71	5	Prevalence	179	Ethiopia	3	Both	27	Age-standardized	683	Periodontal diseases	3	Rate	1990	2021	2.23814	5.45645	-0.392004
72	5	Prevalence	8	Taiwan (Province of China)	3	Both	27	Age-standardized	683	Periodontal diseases	3	Rate	1990	2021	3.45665	8.52399	-0.678946
73	5	Prevalence	162	Bhutan	3	Both	27	Age-standardized	683	Periodontal diseases	3	Rate	1990	2021	9.44299	44.3896	-15.1128
74	5	Prevalence	198	Zimbabwe	3	Both	27	Age-standardized	683	Periodontal diseases	3	Rate	1990	2021	-6.37384	-1.50272	-11.3403
75	5	Prevalence	21	Oceania	3	Both	27	Age-standardized	683	Periodontal diseases	3	Rate	1990	2021	-77.4495	-65.6815	-85.3275
76	5	Prevalence	191	Zambia	3	Both	27	Age-standardized	683	Periodontal diseases	3	Rate	1990	2021	-42.0425	-18.3983	-58.956
77	5	Prevalence	175	Burundi	3	Both	27	Age-standardized	683	Periodontal diseases	3	Rate	1990	2021	-53.307	-32.4181	-67.435
78	5	Prevalence	142	Islamic Republic of Iran	3	Both	27	Age-standardized	683	Periodontal diseases	3	Rate	1990	2021	1.13798	11.5836	-5.64725
79	5	Prevalence	19	Democratic Republic of Timor-Leste	3	Both	27	Age-standardized	683	Periodontal diseases	3	Rate	1990	2021	-30.9397	4.87158	-55.1638
80	5	Prevalence	200	Benin	3	Both	27	Age-standardized	683	Periodontal diseases	3	Rate	1990	2021	-20.2278	3.51699	-38.9308
81	5	Prevalence	41	Republic of Uzbekistan	3	Both	27	Age-standardized	683	Periodontal diseases	3	Rate	1990	2021	-6.274	42.3165	-38.3958
82	5	Prevalence	32	Central Asia	3	Both	27	Age-standardized	683	Periodontal diseases	3	Rate	1990	2021	-7.94477	36.6121	-37.6416
83	5	Prevalence	213	Niger	3	Both	27	Age-standardized	683	Periodontal diseases	3	Rate	1990	2021	-63.4887	-47.0767	-74.6442
84	5	Prevalence	105	Antigua and Barbuda	3	Both	27	Age-standardized	683	Periodontal diseases	3	Rate	1990	2021	-8.47714	21.7125	-31.1144
85	5	Prevalence	63	Ukraine	3	Both	27	Age-standardized	683	Periodontal diseases	3	Rate	1990	2021	-11.8648	28.2397	-38.2013
86	5	Prevalence	28	Solomon Islands	3	Both	27	Age-standardized	683	Periodontal diseases	3	Rate	1990	2021	-78.4756	-65.9273	-86.283
87	5	Prevalence	209	Guinea-Bissau	3	Both	27	Age-standardized	683	Periodontal diseases	3	Rate	1990	2021	-22.982	0.461879	-41.5719
88	5	Prevalence	52	Romania	3	Both	27	Age-standardized	683	Periodontal diseases	3	Rate	1990	2021	11.8459	69.5925	-26.7361
89	5	Prevalence	4	Southeast Asia, East Asia, and Oceania	3	Both	27	Age-standardized	683	Periodontal diseases	3	Rate	1990	2021	-4.21175	11.3282	-14.9467
90	5	Prevalence	30	Republic of Vanuatu	3	Both	27	Age-standardized	683	Periodontal diseases	3	Rate	1990	2021	-79.083	-66.9588	-86.8521
91	5	Prevalence	173	Gabon	3	Both	27	Age-standardized	683	Periodontal diseases	3	Rate	1990	2021	-34.6	-11.1164	-52.3186
92	5	Prevalence	177	Djibouti	3	Both	27	Age-standardized	683	Periodontal diseases	3	Rate	1990	2021	-44.0107	-22.0312	-60.1528
93	5	Prevalence	39	Republic of Tajikistan	3	Both	27	Age-standardized	683	Periodontal diseases	3	Rate	1990	2021	-19.7936	20.7846	-47.8161
94	5	Prevalence	74	Principality of Andorra	3	Both	27	Age-standardized	683	Periodontal diseases	3	Rate	1990	2021	-15.357	27.3873	-41.8205
95	5	Prevalence	83	Republic of Iceland	3	Both	27	Age-standardized	683	Periodontal diseases	3	Rate	1990	2021	-5.70457	16.0893	-26.4914
96	5	Prevalence	171	Democratic Republic of the Congo	3	Both	27	Age-standardized	683	Periodontal diseases	3	Rate	1990	2021	-49.7075	-26.5251	-65.8365
97	5	Prevalence	61	Republic of Moldova	3	Both	27	Age-standardized	683	Periodontal diseases	3	Rate	1990	2021	-6.11281	42.553	-38.2039
98	5	Prevalence	207	Ghana	3	Both	27	Age-standardized	683	Periodontal diseases	3	Rate	1990	2021	3.72128	7.84903	-0.0505849
99	5	Prevalence	94	Swiss Confederation	3	Both	27	Age-standardized	683	Periodontal diseases	3	Rate	1990	2021	-11.2242	34.0265	-39.235
100	5	Prevalence	107	Barbados	3	Both	27	Age-standardized	683	Periodontal diseases	3	Rate	1990	2021	-11.1215	16.9121	-33.9463
101	5	Prevalence	72	New Zealand	3	Both	27	Age-standardized	683	Periodontal diseases	3	Rate	1990	2021	48.5402	128.9	3.9881
102	5	Prevalence	85	State of Israel	3	Both	27	Age-standardized	683	Periodontal diseases	3	Rate	1990	2021	-12.3364	35.3095	-41.8858
103	5	Prevalence	240	Europe & Central Asia - WB	3	Both	27	Age-standardized	683	Periodontal diseases	3	Rate	1990	2021	-3.30892	32.9691	-30.1538
104	5	Prevalence	189	United Republic of Tanzania	3	Both	27	Age-standardized	683	Periodontal diseases	3	Rate	1990	2021	-43.0316	-19.0677	-59.9279
105	5	Prevalence	96	Southern Latin America	3	Both	27	Age-standardized	683	Periodontal diseases	3	Rate	1990	2021	6.09472	52.8824	-24.8552
106	5	Prevalence	202	Cameroon	3	Both	27	Age-standardized	683	Periodontal diseases	3	Rate	1990	2021	-1.39014	2.34726	-5.10951
107	5	Prevalence	15	Republic of the Union of Myanmar	3	Both	27	Age-standardized	683	Periodontal diseases	3	Rate	1990	2021	-19.0698	25.4921	-46.5888
108	5	Prevalence	184	Mozambique	3	Both	27	Age-standardized	683	Periodontal diseases	3	Rate	1990	2021	-43.4667	-16.7899	-60.6869
109	5	Prevalence	103	Latin America and Caribbean	3	Both	27	Age-standardized	683	Periodontal diseases	3	Rate	1990	2021	3.43155	27.3583	-13.2523
110	5	Prevalence	50	Montenegro	3	Both	27	Age-standardized	683	Periodontal diseases	3	Rate	1990	2021	2.7713	55.6198	-31.9768
111	5	Prevalence	26	Independent State of Papua New Guinea	3	Both	27	Age-standardized	683	Periodontal diseases	3	Rate	1990	2021	-78.225	-66.2949	-86.1859
112	5	Prevalence	160	Afghanistan	3	Both	27	Age-standardized	683	Periodontal diseases	3	Rate	1990	2021	9.54978	73.3705	-30.4159
113	5	Prevalence	211	Mali	3	Both	27	Age-standardized	683	Periodontal diseases	3	Rate	1990	2021	3.88979	8.69282	-0.38396
114	5	Prevalence	186	Seychelles	3	Both	27	Age-standardized	683	Periodontal diseases	3	Rate	1990	2021	-32.7491	-1.21783	-53.8355
115	5	Prevalence	149	Palestine	3	Both	27	Age-standardized	683	Periodontal diseases	3	Rate	1990	2021	19.2832	85.4052	-21.8677
116	5	Prevalence	242	Sub-Saharan Africa - WB	3	Both	27	Age-standardized	683	Periodontal diseases	3	Rate	1990	2021	-34.2134	-19.7519	-44.8694
117	5	Prevalence	17	Democratic Socialist Republic of Sri Lanka	3	Both	27	Age-standardized	683	Periodontal diseases	3	Rate	1990	2021	-56.4588	-39.4672	-69.3005
118	5	Prevalence	169	Central African Republic	3	Both	27	Age-standardized	683	Periodontal diseases	3	Rate	1990	2021	-48.8224	-25.195	-64.9885
119	5	Prevalence	92	Kingdom of Spain	3	Both	27	Age-standardized	683	Periodontal diseases	3	Rate	1990	2021	-76.4574	-63.0562	-85.012
120	5	Prevalence	54	Slovak Republic	3	Both	27	Age-standardized	683	Periodontal diseases	3	Rate	1990	2021	9.87378	67.5883	-27.1041
121	5	Prevalence	158	South Asia	3	Both	27	Age-standardized	683	Periodontal diseases	3	Rate	1990	2021	7.62228	33.2096	-11.2242
122	5	Prevalence	57	Republic of Belarus	3	Both	27	Age-standardized	683	Periodontal diseases	3	Rate	1990	2021	-1.66903	43.8719	-31.1665
123	5	Prevalence	147	Libya	3	Both	27	Age-standardized	683	Periodontal diseases	3	Rate	1990	2021	-11.7423	26.8084	-38.5841
124	5	Prevalence	79	Republic of Finland	3	Both	27	Age-standardized	683	Periodontal diseases	3	Rate	1990	2021	3.43313	48.0561	-25.1587
125	5	Prevalence	46	Republic of Croatia	3	Both	27	Age-standardized	683	Periodontal diseases	3	Rate	1990	2021	16.832	50.6265	-13.1853
126	5	Prevalence	123	Republic of Peru	3	Both	27	Age-standardized	683	Periodontal diseases	3	Rate	1990	2021	2.01566	21.7996	-16.533
127	5	Prevalence	116	Saint Lucia	3	Both	27	Age-standardized	683	Periodontal diseases	3	Rate	1990	2021	-6.66835	27.8014	-31.6014
128	5	Prevalence	87	Grand Duchy of Luxembourg	3	Both	27	Age-standardized	683	Periodontal diseases	3	Rate	1990	2021	-8.13479	39.2433	-38.9537
129	5	Prevalence	129	Republic of Honduras	3	Both	27	Age-standardized	683	Periodontal diseases	3	Rate	1990	2021	-0.609956	46.9535	-30.5187
130	5	Prevalence	140	Kingdom of Bahrain	3	Both	27	Age-standardized	683	Periodontal diseases	3	Rate	1990	2021	9.01066	59.2771	-20.8052
131	5	Prevalence	136	Republic of Paraguay	3	Both	27	Age-standardized	683	Periodontal diseases	3	Rate	1990	2021	-1.72998	45.4095	-30.4487
132	5	Prevalence	81	Federal Republic of Germany	3	Both	27	Age-standardized	683	Periodontal diseases	3	Rate	1990	2021	0.770676	23.3967	-20.7326
133	5	Prevalence	76	Kingdom of Belgium	3	Both	27	Age-standardized	683	Periodontal diseases	3	Rate	1990	2021	-4.42339	29.4398	-28.8169
134	5	Prevalence	138	North Africa and Middle East	3	Both	27	Age-standardized	683	Periodontal diseases	3	Rate	1990	2021	20.8646	67.0123	-10.7934
135	5	Prevalence	24	Republic of the Marshall Islands	3	Both	27	Age-standardized	683	Periodontal diseases	3	Rate	1990	2021	-78.6761	-67.0382	-86.3846
136	5	Prevalence	151	Qatar	3	Both	27	Age-standardized	683	Periodontal diseases	3	Rate	1990	2021	3.69081	42.3762	-21.6399
137	5	Prevalence	125	Republic of Colombia	3	Both	27	Age-standardized	683	Periodontal diseases	3	Rate	1990	2021	2.25613	43.8984	-24.211
138	5	Prevalence	90	Kingdom of Norway	3	Both	27	Age-standardized	683	Periodontal diseases	3	Rate	1990	2021	-7.38429	19.5166	-28.9817
139	5	Prevalence	65	High-income Asia Pacific	3	Both	27	Age-standardized	683	Periodontal diseases	3	Rate	1990	2021	2.55459	53.7043	-29.7666
140	5	Prevalence	167	Central Sub-Saharan Africa	3	Both	27	Age-standardized	683	Periodontal diseases	3	Rate	1990	2021	-44.7126	-20.3829	-61.8798
141	5	Prevalence	70	Australasia	3	Both	27	Age-standardized	683	Periodontal diseases	3	Rate	1990	2021	21.7048	90.5807	-18.6573
142	5	Prevalence	59	Republic of Latvia	3	Both	27	Age-standardized	683	Periodontal diseases	3	Rate	1990	2021	1.11883	46.2361	-28.6252
143	5	Prevalence	114	Republic of Haiti	3	Both	27	Age-standardized	683	Periodontal diseases	3	Rate	1990	2021	-15.8556	24.2413	-43.4263
144	5	Prevalence	110	Commonwealth of Dominica	3	Both	27	Age-standardized	683	Periodontal diseases	3	Rate	1990	2021	-6.47525	28.0722	-30.9439
145	5	Prevalence	156	United Arab Emirates	3	Both	27	Age-standardized	683	Periodontal diseases	3	Rate	1990	2021	-0.303778	40.4622	-26.9904
146	5	Prevalence	196	South Africa	3	Both	27	Age-standardized	683	Periodontal diseases	3	Rate	1990	2021	-26.4191	6.53357	-47.8273
147	5	Prevalence	127	Republic of El Salvador	3	Both	27	Age-standardized	683	Periodontal diseases	3	Rate	1990	2021	4.65674	51.0062	-25.4181
148	5	Prevalence	413	Tokelau	3	Both	27	Age-standardized	683	Periodontal diseases	3	Rate	1990	2021	-75.8967	-62.7217	-84.7054
149	5	Prevalence	351	Guam	3	Both	27	Age-standardized	683	Periodontal diseases	3	Rate	1990	2021	-73.7414	-62.2379	-82.2974
150	5	Prevalence	13	Malaysia	3	Both	27	Age-standardized	683	Periodontal diseases	3	Rate	1990	2021	-29.8883	3.54974	-52.7749
151	5	Prevalence	393	Saint Kitts and Nevis	3	Both	27	Age-standardized	683	Periodontal diseases	3	Rate	1990	2021	-3.42342	28.7649	-27.0308
152	5	Prevalence	99	Eastern Republic of Uruguay	3	Both	27	Age-standardized	683	Periodontal diseases	3	Rate	1990	2021	4.37551	38.9717	-20.6857
153	5	Prevalence	48	Hungary	3	Both	27	Age-standardized	683	Periodontal diseases	3	Rate	1990	2021	10.9996	82.201	-30.4959
154	5	Prevalence	145	State of Kuwait	3	Both	27	Age-standardized	683	Periodontal diseases	3	Rate	1990	2021	5.70816	51.5684	-21.5384
155	5	Prevalence	248	Eastern Africa	3	Both	27	Age-standardized	683	Periodontal diseases	3	Rate	1990	2021	-25.3489	-9.78518	-36.4867
156	5	Prevalence	218	Togo	3	Both	27	Age-standardized	683	Periodontal diseases	3	Rate	1990	2021	-23.4234	-0.518555	-41.9497
157	5	Prevalence	112	Grenada	3	Both	27	Age-standardized	683	Periodontal diseases	3	Rate	1990	2021	-1.66455	37.3925	-27.5102
158	5	Prevalence	35	Georgia	3	Both	27	Age-standardized	683	Periodontal diseases	3	Rate	1990	2021	-10.2321	30.3849	-37.6018
159	5	Prevalence	37	Kyrgyz Republic	3	Both	27	Age-standardized	683	Periodontal diseases	3	Rate	1990	2021	-17.6754	23.3617	-45.8805
160	5	Prevalence	118	Republic of Suriname	3	Both	27	Age-standardized	683	Periodontal diseases	3	Rate	1990	2021	-7.49002	24.7953	-31.9902
161	5	Prevalence	120	Andean Latin America	3	Both	27	Age-standardized	683	Periodontal diseases	3	Rate	1990	2021	0.299617	23.7644	-19.9038
162	5	Prevalence	134	Tropical Latin America	3	Both	27	Age-standardized	683	Periodontal diseases	3	Rate	1990	2021	14.2477	26.6989	4.09578
163	5	Prevalence	11	Republic of Indonesia	3	Both	27	Age-standardized	683	Periodontal diseases	3	Rate	1990	2021	3.31894	5.14305	1.60233
164	5	Prevalence	101	Canada	3	Both	27	Age-standardized	683	Periodontal diseases	3	Rate	1990	2021	-2.21936	34.2708	-26.5659
165	5	Prevalence	320	Cook Islands	3	Both	27	Age-standardized	683	Periodontal diseases	3	Rate	1990	2021	-72.689	-60.1982	-82.0015
166	5	Prevalence	261	Southern Africa	3	Both	27	Age-standardized	683	Periodontal diseases	3	Rate	1990	2021	-32.3635	-5.17358	-49.9514
167	5	Prevalence	165	Pakistan	3	Both	27	Age-standardized	683	Periodontal diseases	3	Rate	1990	2021	2.74318	25.8626	-18.1531
168	5	Prevalence	194	Lesotho	3	Both	27	Age-standardized	683	Periodontal diseases	3	Rate	1990	2021	24.9233	31.8353	18.837
169	5	Prevalence	68	Republic of Korea	3	Both	27	Age-standardized	683	Periodontal diseases	3	Rate	1990	2021	10.4695	68.4075	-26.2401
170	5	Prevalence	44	Bosnia and Herzegovina	3	Both	27	Age-standardized	683	Periodontal diseases	3	Rate	1990	2021	39.8899	118.824	-12.1573
171	5	Prevalence	180	Kenya	3	Both	27	Age-standardized	683	Periodontal diseases	3	Rate	1990	2021	-8.30759	18.2895	-29.3596
172	5	Prevalence	22	Republic of Fiji	3	Both	27	Age-standardized	683	Periodontal diseases	3	Rate	1990	2021	-76.1311	-63.6508	-84.451
173	5	Prevalence	201	Burkina Faso	3	Both	27	Age-standardized	683	Periodontal diseases	3	Rate	1990	2021	1.85139	5.39454	-1.5187
174	5	Prevalence	199	Western Sub-Saharan Africa	3	Both	27	Age-standardized	683	Periodontal diseases	3	Rate	1990	2021	-38.9314	-28.7572	-46.8808
175	5	Prevalence	216	Senegal	3	Both	27	Age-standardized	683	Periodontal diseases	3	Rate	1990	2021	-20.2237	1.42803	-38.288
176	5	Prevalence	374	Niue	3	Both	27	Age-standardized	683	Periodontal diseases	3	Rate	1990	2021	-75.6653	-63.5919	-83.9808
177	5	Prevalence	182	Malawi	3	Both	27	Age-standardized	683	Periodontal diseases	3	Rate	1990	2021	-49.0976	-27.0721	-64.1141
178	5	Prevalence	205	C么te d'Ivoire	3	Both	27	Age-standardized	683	Periodontal diseases	3	Rate	1990	2021	-20.1412	-0.872104	-38.6436
179	5	Prevalence	154	Tunisia	3	Both	27	Age-standardized	683	Periodontal diseases	3	Rate	1990	2021	20.258	81.4039	-18.0428
180	5	Prevalence	176	Comoros	3	Both	27	Age-standardized	683	Periodontal diseases	3	Rate	1990	2021	-46.4221	-24.4476	-61.2176
181	5	Prevalence	163	India	3	Both	27	Age-standardized	683	Periodontal diseases	3	Rate	1990	2021	7.76141	33.0088	-9.91395
182	5	Prevalence	64	High-income	3	Both	27	Age-standardized	683	Periodontal diseases	3	Rate	1990	2021	-5.1358	27.951	-28.1987
183	5	Prevalence	172	Equatorial Guinea	3	Both	27	Age-standardized	683	Periodontal diseases	3	Rate	1990	2021	-16.9973	16.8117	-40.5524
184	5	Prevalence	132	Republic of Panama	3	Both	27	Age-standardized	683	Periodontal diseases	3	Rate	1990	2021	7.38156	49.415	-19.2477
185	5	Prevalence	53	Republic of Serbia	3	Both	27	Age-standardized	683	Periodontal diseases	3	Rate	1990	2021	3.4378	56.0894	-31.7809
186	5	Prevalence	210	Liberia	3	Both	27	Age-standardized	683	Periodontal diseases	3	Rate	1990	2021	-4.18599	0.466255	-9.66099
187	5	Prevalence	192	Southern Sub-Saharan Africa	3	Both	27	Age-standardized	683	Periodontal diseases	3	Rate	1990	2021	-21.6298	8.06716	-40.7124
188	5	Prevalence	33	Republic of Armenia	3	Both	27	Age-standardized	683	Periodontal diseases	3	Rate	1990	2021	-5.59156	39.9135	-36.7973
189	5	Prevalence	143	Republic of Iraq	3	Both	27	Age-standardized	683	Periodontal diseases	3	Rate	1990	2021	12.565	64.6713	-23.0768
190	5	Prevalence	380	Palau	3	Both	27	Age-standardized	683	Periodontal diseases	3	Rate	1990	2021	-76.04	-63.8382	-84.226
191	5	Prevalence	75	Republic of Austria	3	Both	27	Age-standardized	683	Periodontal diseases	3	Rate	1990	2021	-8.82546	38.2737	-40.945
192	5	Prevalence	214	Nigeria	3	Both	27	Age-standardized	683	Periodontal diseases	3	Rate	1990	2021	-74.1649	-62.9538	-81.8756
193	5	Prevalence	298	American Samoa	3	Both	27	Age-standardized	683	Periodontal diseases	3	Rate	1990	2021	-4.20314	0.0541324	-8.9778
194	5	Prevalence	435	South Sudan	3	Both	27	Age-standardized	683	Periodontal diseases	3	Rate	1990	2021	-51.6735	-32.1786	-65.7016
195	5	Prevalence	190	Uganda	3	Both	27	Age-standardized	683	Periodontal diseases	3	Rate	1990	2021	-43.0675	-17.6777	-60.3267
196	5	Prevalence	485	KwaZulu-Natal	3	Both	27	Age-standardized	683	Periodontal diseases	3	Rate	1990	2021	-33.0101	7.06657	-57.1684
197	5	Prevalence	241	Latin America & Caribbean - WB	3	Both	27	Age-standardized	683	Periodontal diseases	3	Rate	1990	2021	3.79746	29.6343	-14.0296
198	5	Prevalence	174	Eastern Sub-Saharan Africa	3	Both	27	Age-standardized	683	Periodontal diseases	3	Rate	1990	2021	-31.1502	-13.4298	-43.5977
199	5	Prevalence	433	Northern Ireland	3	Both	27	Age-standardized	683	Periodontal diseases	3	Rate	1990	2021	-6.05173	50.0255	-40.9292
200	5	Prevalence	367	Monaco	3	Both	27	Age-standardized	683	Periodontal diseases	3	Rate	1990	2021	-12.1657	26.2086	-37.9015
201	5	Prevalence	108	Belize	3	Both	27	Age-standardized	683	Periodontal diseases	3	Rate	1990	2021	-5.71115	34.2031	-31.768
202	5	Prevalence	178	Eritrea	3	Both	27	Age-standardized	683	Periodontal diseases	3	Rate	1990	2021	-45.3284	-21.5219	-61.7687
203	5	Prevalence	97	Argentine Republic	3	Both	27	Age-standardized	683	Periodontal diseases	3	Rate	1990	2021	3.62656	53.2587	-29.4843
204	5	Prevalence	203	Cabo Verde	3	Both	27	Age-standardized	683	Periodontal diseases	3	Rate	1990	2021	6.21698	11.6897	1.67302
205	5	Prevalence	86	Republic of Italy	3	Both	27	Age-standardized	683	Periodontal diseases	3	Rate	1990	2021	-7.71107	37.2853	-38.3071
206	5	Prevalence	483	Free State	3	Both	27	Age-standardized	683	Periodontal diseases	3	Rate	1990	2021	-31.2708	4.88156	-56.442
207	5	Prevalence	208	Guinea	3	Both	27	Age-standardized	683	Periodontal diseases	3	Rate	1990	2021	-0.954398	2.10534	-3.72109
208	5	Prevalence	529	Connecticut	3	Both	27	Age-standardized	683	Periodontal diseases	3	Rate	1990	2021	-2.33375	4.26755	-8.74141
209	5	Prevalence	243	Middle East & North Africa - WB	3	Both	27	Age-standardized	683	Periodontal diseases	3	Rate	1990	2021	8.06572	46.3127	-19.7611
210	5	Prevalence	185	Rwanda	3	Both	27	Age-standardized	683	Periodontal diseases	3	Rate	1990	2021	-43.6895	-20.1009	-61.1446
211	5	Prevalence	88	Republic of Malta	3	Both	27	Age-standardized	683	Periodontal diseases	3	Rate	1990	2021	-4.90095	43.8518	-36.4388
212	5	Prevalence	150	Oman	3	Both	27	Age-standardized	683	Periodontal diseases	3	Rate	1990	2021	11.8411	63.0501	-21.9192
213	5	Prevalence	212	Mauritania	3	Both	27	Age-standardized	683	Periodontal diseases	3	Rate	1990	2021	-19.3511	1.89178	-37.4083
214	5	Prevalence	117	Saint Vincent and the Grenadines	3	Both	27	Age-standardized	683	Periodontal diseases	3	Rate	1990	2021	-3.73871	33.7624	-29.4218
215	5	Prevalence	187	Somalia	3	Both	27	Age-standardized	683	Periodontal diseases	3	Rate	1990	2021	-58.9174	-39.4364	-72.1761
216	5	Prevalence	161	Bangladesh	3	Both	27	Age-standardized	683	Periodontal diseases	3	Rate	1990	2021	6.8232	41.9384	-18.869
217	5	Prevalence	527	California	3	Both	27	Age-standardized	683	Periodontal diseases	3	Rate	1990	2021	-2.90416	2.85869	-8.29837
218	5	Prevalence	152	Saudi Arabia	3	Both	27	Age-standardized	683	Periodontal diseases	3	Rate	1990	2021	17.8983	65.7029	-18.5922
219	5	Prevalence	139	People's Democratic Republic of Algeria	3	Both	27	Age-standardized	683	Periodontal diseases	3	Rate	1990	2021	9.96236	59.1014	-22.6951
220	5	Prevalence	130	United Mexican States	3	Both	27	Age-standardized	683	Periodontal diseases	3	Rate	1990	2021	-1.79666	20.9878	-16.8745
221	5	Prevalence	55	Republic of Slovenia	3	Both	27	Age-standardized	683	Periodontal diseases	3	Rate	1990	2021	-1.48184	28.2937	-25.8127
222	5	Prevalence	77	Republic of Cyprus	3	Both	27	Age-standardized	683	Periodontal diseases	3	Rate	1990	2021	-11.0536	37.9918	-40.8928
223	5	Prevalence	547	Mississippi	3	Both	27	Age-standardized	683	Periodontal diseases	3	Rate	1990	2021	-12.4054	28.9285	-42.1018
224	5	Prevalence	488	North-West	3	Both	27	Age-standardized	683	Periodontal diseases	3	Rate	1990	2021	12.455	19.3026	6.84534
225	5	Prevalence	66	Brunei Darussalam	3	Both	27	Age-standardized	683	Periodontal diseases	3	Rate	1990	2021	-15.9772	20.6723	-41.385
226	5	Prevalence	479	WHO region	3	Both	27	Age-standardized	683	Periodontal diseases	3	Rate	1990	2021	1.74041	26.694	-15.613
227	5	Prevalence	549	Montana	3	Both	27	Age-standardized	683	Periodontal diseases	3	Rate	1990	2021	-3.33754	2.23899	-9.00903
228	5	Prevalence	396	San Marino	3	Both	27	Age-standardized	683	Periodontal diseases	3	Rate	1990	2021	-16.6283	23.9438	-44.059
229	5	Prevalence	141	Arab Republic of Egypt	3	Both	27	Age-standardized	683	Periodontal diseases	3	Rate	1990	2021	23.8481	86.4643	-17.4723
230	5	Prevalence	538	Iowa	3	Both	27	Age-standardized	683	Periodontal diseases	3	Rate	1990	2021	-16.4293	64.0357	-56.7804
231	5	Prevalence	195	Namibia	3	Both	27	Age-standardized	683	Periodontal diseases	3	Rate	1990	2021	17.0334	24.1118	10.6366
232	5	Prevalence	525	Arizona	3	Both	27	Age-standardized	683	Periodontal diseases	3	Rate	1990	2021	-4.57282	1.57577	-10.296
233	5	Prevalence	416	Tuvalu	3	Both	27	Age-standardized	683	Periodontal diseases	3	Rate	1990	2021	-76.8371	-63.7333	-85.5133
234	5	Prevalence	121	Plurinational State of Bolivia	3	Both	27	Age-standardized	683	Periodontal diseases	3	Rate	1990	2021	-2.60797	45.4481	-33.1703
235	5	Prevalence	4652	Durango	3	Both	27	Age-standardized	683	Periodontal diseases	3	Rate	1990	2021	-3.11468	35.8719	-28.307
236	5	Prevalence	560	Oregon	3	Both	27	Age-standardized	683	Periodontal diseases	3	Rate	1990	2021	-10.1621	31.6372	-39.1253
237	5	Prevalence	536	Illinois	3	Both	27	Age-standardized	683	Periodontal diseases	3	Rate	1990	2021	-11.7653	30.916	-40.4418
238	5	Prevalence	128	Republic of Guatemala	3	Both	27	Age-standardized	683	Periodontal diseases	3	Rate	1990	2021	0.725386	44.1126	-28.7512
239	5	Prevalence	558	Ohio	3	Both	27	Age-standardized	683	Periodontal diseases	3	Rate	1990	2021	-12.2827	25.354	-41.214
240	5	Prevalence	569	Virginia	3	Both	27	Age-standardized	683	Periodontal diseases	3	Rate	1990	2021	-10.703	30.5127	-39.9324
241	5	Prevalence	490	Western Cape	3	Both	27	Age-standardized	683	Periodontal diseases	3	Rate	1990	2021	-34.4279	1.15976	-58.5264
242	5	Prevalence	254	Northern Africa	3	Both	27	Age-standardized	683	Periodontal diseases	3	Rate	1990	2021	10.1063	58.8686	-22.7699
243	5	Prevalence	263	Western Africa	3	Both	27	Age-standardized	683	Periodontal diseases	3	Rate	1990	2021	-42.8998	-32.3226	-50.8177
244	5	Prevalence	197	Eswatini	3	Both	27	Age-standardized	683	Periodontal diseases	3	Rate	1990	2021	15.5778	22.0513	10.0095
245	5	Prevalence	571	West Virginia	3	Both	27	Age-standardized	683	Periodontal diseases	3	Rate	1990	2021	-13.9425	26.4206	-41.9936
246	5	Prevalence	523	Alabama	3	Both	27	Age-standardized	683	Periodontal diseases	3	Rate	1990	2021	-4.05322	1.69014	-10.81
247	5	Prevalence	545	Michigan	3	Both	27	Age-standardized	683	Periodontal diseases	3	Rate	1990	2021	-12.9073	26.9647	-41.2724
248	5	Prevalence	4624	Greater London	3	Both	27	Age-standardized	683	Periodontal diseases	3	Rate	1990	2021	-13.902	28.5673	-39.936
249	5	Prevalence	4626	South West England	3	Both	27	Age-standardized	683	Periodontal diseases	3	Rate	1990	2021	-5.28758	15.7921	-18.2614
250	5	Prevalence	239	East Asia & Pacific - WB	3	Both	27	Age-standardized	683	Periodontal diseases	3	Rate	1990	2021	-1.62482	16.8947	-14.3564
251	5	Prevalence	217	Sierra Leone	3	Both	27	Age-standardized	683	Periodontal diseases	3	Rate	1990	2021	51.0034	102.635	20.7387
252	5	Prevalence	181	Madagascar	3	Both	27	Age-standardized	683	Periodontal diseases	3	Rate	1990	2021	-78.799	-69.1565	-85.3458
253	5	Prevalence	183	Mauritius	3	Both	27	Age-standardized	683	Periodontal diseases	3	Rate	1990	2021	-31.2923	1.1109	-53.9389
254	5	Prevalence	349	Greenland	3	Both	27	Age-standardized	683	Periodontal diseases	3	Rate	1990	2021	-0.195576	46.0462	-29.2525
255	5	Prevalence	4650	Chihuahua	3	Both	27	Age-standardized	683	Periodontal diseases	3	Rate	1990	2021	-4.90436	28.5013	-30.1474
256	5	Prevalence	119	Republic of Trinidad and Tobago	3	Both	27	Age-standardized	683	Periodontal diseases	3	Rate	1990	2021	-2.73931	28.0017	-26.8567
257	5	Prevalence	4661	Nuevo Le贸n	3	Both	27	Age-standardized	683	Periodontal diseases	3	Rate	1990	2021	-4.38796	29.1386	-28.6394
258	5	Prevalence	532	Florida	3	Both	27	Age-standardized	683	Periodontal diseases	3	Rate	1990	2021	-4.26843	0.919634	-10.2797
259	5	Prevalence	376	Northern Mariana Islands	3	Both	27	Age-standardized	683	Periodontal diseases	3	Rate	1990	2021	-76.8891	-66.4257	-84.4656
260	5	Prevalence	206	Gambia	3	Both	27	Age-standardized	683	Periodontal diseases	3	Rate	1990	2021	-0.796938	2.43827	-3.74164
261	5	Prevalence	556	North Carolina	3	Both	27	Age-standardized	683	Periodontal diseases	3	Rate	1990	2021	-2.43308	2.57205	-7.89462
262	5	Prevalence	478	World Bank Regions	3	Both	27	Age-standardized	683	Periodontal diseases	3	Rate	1990	2021	1.75425	26.621	-15.5455
263	5	Prevalence	193	Botswana	3	Both	27	Age-standardized	683	Periodontal diseases	3	Rate	1990	2021	-20.7304	30.8641	-49.756
264	5	Prevalence	4648	Colima	3	Both	27	Age-standardized	683	Periodontal diseases	3	Rate	1990	2021	-3.97518	31.8361	-28.9048
265	5	Prevalence	567	Utah	3	Both	27	Age-standardized	683	Periodontal diseases	3	Rate	1990	2021	-10.0604	33.6817	-38.765
266	5	Prevalence	554	New Mexico	3	Both	27	Age-standardized	683	Periodontal diseases	3	Rate	1990	2021	-12.4396	28.3512	-40.851
267	5	Prevalence	543	Maryland	3	Both	27	Age-standardized	683	Periodontal diseases	3	Rate	1990	2021	-11.2553	29.3256	-40.6088
268	5	Prevalence	534	Hawaii	3	Both	27	Age-standardized	683	Periodontal diseases	3	Rate	1990	2021	-11.0069	27.4449	-39.7257
269	5	Prevalence	4659	Morelos	3	Both	27	Age-standardized	683	Periodontal diseases	3	Rate	1990	2021	-5.7579	31.077	-29.5446
270	5	Prevalence	541	Louisiana	3	Both	27	Age-standardized	683	Periodontal diseases	3	Rate	1990	2021	-3.38477	2.95145	-9.78074
271	5	Prevalence	486	Limpopo	3	Both	27	Age-standardized	683	Periodontal diseases	3	Rate	1990	2021	-27.5992	16.6672	-54.7589
272	5	Prevalence	4670	Tamaulipas	3	Both	27	Age-standardized	683	Periodontal diseases	3	Rate	1990	2021	0.721039	4.49677	-3.26174
273	5	Prevalence	385	Puerto Rico	3	Both	27	Age-standardized	683	Periodontal diseases	3	Rate	1990	2021	-5.87128	22.9602	-27.5684
274	5	Prevalence	563	South Carolina	3	Both	27	Age-standardized	683	Periodontal diseases	3	Rate	1990	2021	-11.9659	27.5473	-40.5605
275	5	Prevalence	369	Nauru	3	Both	27	Age-standardized	683	Periodontal diseases	3	Rate	1990	2021	-78.7173	-68.4277	-85.9942
276	5	Prevalence	4622	West Midlands	3	Both	27	Age-standardized	683	Periodontal diseases	3	Rate	1990	2021	-17.8131	31.8421	-48.6242
277	5	Prevalence	4726	Bali	3	Both	27	Age-standardized	683	Periodontal diseases	3	Rate	1990	2021	-0.031279	3.54681	-3.77152
278	5	Prevalence	204	Chad	3	Both	27	Age-standardized	683	Periodontal diseases	3	Rate	1990	2021	-20.218	4.56288	-40.2154
279	5	Prevalence	552	New Hampshire	3	Both	27	Age-standardized	683	Periodontal diseases	3	Rate	1990	2021	-3.16296	2.69112	-9.59796
280	5	Prevalence	4620	Yorkshire and the Humber	3	Both	27	Age-standardized	683	Periodontal diseases	3	Rate	1990	2021	-16.5626	34.4455	-47.1447
281	5	Prevalence	215	Sao Tome and Principe	3	Both	27	Age-standardized	683	Periodontal diseases	3	Rate	1990	2021	-18.5636	3.96833	-36.7335
282	5	Prevalence	434	Scotland	3	Both	27	Age-standardized	683	Periodontal diseases	3	Rate	1990	2021	1.36372	61.4834	-36.6212
283	5	Prevalence	528	Colorado	3	Both	27	Age-standardized	683	Periodontal diseases	3	Rate	1990	2021	-3.15213	3.11457	-8.56232
284	5	Prevalence	4715	Bengkulu	3	Both	27	Age-standardized	683	Periodontal diseases	3	Rate	1990	2021	1.37456	5.56685	-2.24271
285	5	Prevalence	565	Tennessee	3	Both	27	Age-standardized	683	Periodontal diseases	3	Rate	1990	2021	-13.259	27.3436	-41.18
286	5	Prevalence	305	Bermuda	3	Both	27	Age-standardized	683	Periodontal diseases	3	Rate	1990	2021	3.41402	7.37708	-0.141092
287	5	Prevalence	484	Gauteng	3	Both	27	Age-standardized	683	Periodontal diseases	3	Rate	1990	2021	-35.6423	-3.6592	-58.4158
288	5	Prevalence	4655	Hidalgo	3	Both	27	Age-standardized	683	Periodontal diseases	3	Rate	1990	2021	-1.49364	38.3943	-28.0885
289	5	Prevalence	4618	North East England	3	Both	27	Age-standardized	683	Periodontal diseases	3	Rate	1990	2021	-14.6991	36.7818	-46.2162
290	5	Prevalence	530	Delaware	3	Both	27	Age-standardized	683	Periodontal diseases	3	Rate	1990	2021	-12.1056	25.8906	-40.3546
291	5	Prevalence	4728	East Nusa Tenggara	3	Both	27	Age-standardized	683	Periodontal diseases	3	Rate	1990	2021	1.27467	5.57737	-2.8902
292	5	Prevalence	4672	Veracruz de Ignacio de la Llave	3	Both	27	Age-standardized	683	Periodontal diseases	3	Rate	1990	2021	-0.0821322	3.38576	-4.03631
293	5	Prevalence	4668	Sonora	3	Both	27	Age-standardized	683	Periodontal diseases	3	Rate	1990	2021	2.41851	6.89261	-1.90369
294	5	Prevalence	4717	Bangka-Belitung Islands	3	Both	27	Age-standardized	683	Periodontal diseases	3	Rate	1990	2021	1.28179	4.91827	-2.60916
295	5	Prevalence	482	Eastern Cape	3	Both	27	Age-standardized	683	Periodontal diseases	3	Rate	1990	2021	-31.6956	11.3689	-56.4141
296	5	Prevalence	4644	Baja California	3	Both	27	Age-standardized	683	Periodontal diseases	3	Rate	1990	2021	-6.19567	25.0844	-30.2885
297	5	Prevalence	4657	M茅xico	3	Both	27	Age-standardized	683	Periodontal diseases	3	Rate	1990	2021	-6.39041	28.6808	-30.4016
298	5	Prevalence	539	Kansas	3	Both	27	Age-standardized	683	Periodontal diseases	3	Rate	1990	2021	-3.70225	2.21681	-9.33039
299	5	Prevalence	550	Nebraska	3	Both	27	Age-standardized	683	Periodontal diseases	3	Rate	1990	2021	-10.6682	30.988	-40.0826
300	5	Prevalence	522	Sudan	3	Both	27	Age-standardized	683	Periodontal diseases	3	Rate	1990	2021	13.3509	21.0279	7.75361
301	5	Prevalence	4646	Campeche	3	Both	27	Age-standardized	683	Periodontal diseases	3	Rate	1990	2021	-2.20597	33.9131	-27.6524
302	5	Prevalence	548	Missouri	3	Both	27	Age-standardized	683	Periodontal diseases	3	Rate	1990	2021	-12.7433	26.0186	-41.8509
303	5	Prevalence	4724	East Java	3	Both	27	Age-standardized	683	Periodontal diseases	3	Rate	1990	2021	5.70759	11.0046	0.652163
304	5	Prevalence	4653	Guanajuato	3	Both	27	Age-standardized	683	Periodontal diseases	3	Rate	1990	2021	3.63708	24.8451	-10.7286
305	5	Prevalence	489	Northern Cape	3	Both	27	Age-standardized	683	Periodontal diseases	3	Rate	1990	2021	-33.3641	4.20283	-57.537
306	5	Prevalence	561	Pennsylvania	3	Both	27	Age-standardized	683	Periodontal diseases	3	Rate	1990	2021	-3.83229	1.68489	-10.609
307	5	Prevalence	526	Arkansas	3	Both	27	Age-standardized	683	Periodontal diseases	3	Rate	1990	2021	-3.55318	2.3363	-9.44631
308	5	Prevalence	524	Alaska	3	Both	27	Age-standardized	683	Periodontal diseases	3	Rate	1990	2021	-6.73473	-1.58846	-12.3658
309	5	Prevalence	422	United States Virgin Islands	3	Both	27	Age-standardized	683	Periodontal diseases	3	Rate	1990	2021	-4.09592	25.5975	-26.1961
310	5	Prevalence	4711	West Sumatra	3	Both	27	Age-standardized	683	Periodontal diseases	3	Rate	1990	2021	4.67662	10.2485	0.0570172
311	5	Prevalence	572	Wisconsin	3	Both	27	Age-standardized	683	Periodontal diseases	3	Rate	1990	2021	-16.5162	74.2523	-56.7381
312	5	Prevalence	559	Oklahoma	3	Both	27	Age-standardized	683	Periodontal diseases	3	Rate	1990	2021	-3.82818	1.44461	-9.43547
313	5	Prevalence	4713	Jambi	3	Both	27	Age-standardized	683	Periodontal diseases	3	Rate	1990	2021	6.49843	11.5937	1.83645
314	5	Prevalence	537	Indiana	3	Both	27	Age-standardized	683	Periodontal diseases	3	Rate	1990	2021	-12.4191	27.7517	-40.9928
315	5	Prevalence	4651	Mexico City	3	Both	27	Age-standardized	683	Periodontal diseases	3	Rate	1990	2021	-2.92365	31.3312	-27.2416
316	5	Prevalence	570	Washington	3	Both	27	Age-standardized	683	Periodontal diseases	3	Rate	1990	2021	-10.063	28.6309	-39.2473
317	5	Prevalence	4709	Aceh	3	Both	27	Age-standardized	683	Periodontal diseases	3	Rate	1990	2021	-4.76674	-0.997206	-9.45405
318	5	Prevalence	4636	Wales	3	Both	27	Age-standardized	683	Periodontal diseases	3	Rate	1990	2021	1.26479	67.1011	-37.022
319	5	Prevalence	4625	South East England	3	Both	27	Age-standardized	683	Periodontal diseases	3	Rate	1990	2021	1.38998	3.94809	-0.724391
320	5	Prevalence	4662	Oaxaca	3	Both	27	Age-standardized	683	Periodontal diseases	3	Rate	1990	2021	0.665276	4.12093	-2.80067
321	5	Prevalence	546	Minnesota	3	Both	27	Age-standardized	683	Periodontal diseases	3	Rate	1990	2021	-9.93402	31.2797	-39.5648
322	5	Prevalence	533	Georgia	3	Both	27	Age-standardized	683	Periodontal diseases	3	Rate	1990	2021	-12.952	27.5807	-40.7661
323	5	Prevalence	568	Vermont	3	Both	27	Age-standardized	683	Periodontal diseases	3	Rate	1990	2021	-2.8663	2.09106	-9.53142
324	5	Prevalence	4664	Quer茅taro	3	Both	27	Age-standardized	683	Periodontal diseases	3	Rate	1990	2021	2.88514	6.49444	-0.849711
325	5	Prevalence	4722	Central Java	3	Both	27	Age-standardized	683	Periodontal diseases	3	Rate	1990	2021	2.40147	7.08444	-2.11025
326	5	Prevalence	557	North Dakota	3	Both	27	Age-standardized	683	Periodontal diseases	3	Rate	1990	2021	-7.67512	35.1805	-38.2951
327	5	Prevalence	4720	Jakarta	3	Both	27	Age-standardized	683	Periodontal diseases	3	Rate	1990	2021	7.73317	13.6161	3.23099
328	5	Prevalence	487	Mpumalanga	3	Both	27	Age-standardized	683	Periodontal diseases	3	Rate	1990	2021	6.96081	13.1092	2.22517
329	5	Prevalence	555	New York	3	Both	27	Age-standardized	683	Periodontal diseases	3	Rate	1990	2021	8.35252	53.8351	-20.829
330	5	Prevalence	4666	San Luis Potos铆	3	Both	27	Age-standardized	683	Periodontal diseases	3	Rate	1990	2021	6.03632	12.3001	2.0085
331	5	Prevalence	4649	Chiapas	3	Both	27	Age-standardized	683	Periodontal diseases	3	Rate	1990	2021	-6.25767	32.4724	-32.2006
332	5	Prevalence	4727	West Nusa Tenggara	3	Both	27	Age-standardized	683	Periodontal diseases	3	Rate	1990	2021	7.82811	13.47	2.74875
333	5	Prevalence	4660	Nayarit	3	Both	27	Age-standardized	683	Periodontal diseases	3	Rate	1990	2021	1.0309	20.0407	-12.2037
334	5	Prevalence	535	Idaho	3	Both	27	Age-standardized	683	Periodontal diseases	3	Rate	1990	2021	-11.2979	28.1659	-39.8091
335	5	Prevalence	564	South Dakota	3	Both	27	Age-standardized	683	Periodontal diseases	3	Rate	1990	2021	-9.55645	34.9864	-37.7341
336	5	Prevalence	4623	East of England	3	Both	27	Age-standardized	683	Periodontal diseases	3	Rate	1990	2021	-16.4514	33.3038	-46.8416
337	5	Prevalence	4671	Tlaxcala	3	Both	27	Age-standardized	683	Periodontal diseases	3	Rate	1990	2021	4.90103	9.29823	0.745591
338	5	Prevalence	553	New Jersey	3	Both	27	Age-standardized	683	Periodontal diseases	3	Rate	1990	2021	-10.7273	28.0796	-38.9404
339	5	Prevalence	544	Massachusetts	3	Both	27	Age-standardized	683	Periodontal diseases	3	Rate	1990	2021	-9.5967	31.1315	-38.5253
340	5	Prevalence	542	Maine	3	Both	27	Age-standardized	683	Periodontal diseases	3	Rate	1990	2021	-12.1175	25.2432	-39.9883
341	5	Prevalence	4656	Jalisco	3	Both	27	Age-standardized	683	Periodontal diseases	3	Rate	1990	2021	-2.94104	36.8476	-27.6994
342	5	Prevalence	4621	East Midlands	3	Both	27	Age-standardized	683	Periodontal diseases	3	Rate	1990	2021	-16.4892	34.6115	-47.597
343	5	Prevalence	566	Texas	3	Both	27	Age-standardized	683	Periodontal diseases	3	Rate	1990	2021	-3.60539	2.6825	-10.2828
344	5	Prevalence	4619	North West England	3	Both	27	Age-standardized	683	Periodontal diseases	3	Rate	1990	2021	-15.817	36.1918	-46.7451
345	5	Prevalence	4716	Lampung	3	Both	27	Age-standardized	683	Periodontal diseases	3	Rate	1990	2021	6.04832	10.5926	1.92146
346	5	Prevalence	551	Nevada	3	Both	27	Age-standardized	683	Periodontal diseases	3	Rate	1990	2021	-14.5351	23.16	-41.8938
347	5	Prevalence	4729	West Kalimantan	3	Both	27	Age-standardized	683	Periodontal diseases	3	Rate	1990	2021	0.340219	4.41791	-3.7774
348	5	Prevalence	4669	Tabasco	3	Both	27	Age-standardized	683	Periodontal diseases	3	Rate	1990	2021	0.740452	4.83261	-2.26956
349	5	Prevalence	4673	Yucat谩n	3	Both	27	Age-standardized	683	Periodontal diseases	3	Rate	1990	2021	4.89891	9.27737	1.3587
350	5	Prevalence	531	District of Columbia	3	Both	27	Age-standardized	683	Periodontal diseases	3	Rate	1990	2021	-0.144551	6.38668	-5.41072
351	5	Prevalence	4718	Riau Islands	3	Both	27	Age-standardized	683	Periodontal diseases	3	Rate	1990	2021	-0.395402	2.66958	-3.85229
352	5	Prevalence	4658	Michoac谩n de Ocampo	3	Both	27	Age-standardized	683	Periodontal diseases	3	Rate	1990	2021	-4.65988	32.4875	-29.4104
353	5	Prevalence	4654	Guerrero	3	Both	27	Age-standardized	683	Periodontal diseases	3	Rate	1990	2021	-6.67727	31.6123	-31.6996
354	5	Prevalence	540	Kentucky	3	Both	27	Age-standardized	683	Periodontal diseases	3	Rate	1990	2021	-13.3989	26.4842	-41.6281
355	5	Prevalence	4725	Banten	3	Both	27	Age-standardized	683	Periodontal diseases	3	Rate	1990	2021	1.148	5.94373	-3.57639
356	5	Prevalence	4647	Coahuila	3	Both	27	Age-standardized	683	Periodontal diseases	3	Rate	1990	2021	0.291917	18.5344	-12.7632
357	5	Prevalence	4645	Baja California Sur	3	Both	27	Age-standardized	683	Periodontal diseases	3	Rate	1990	2021	0.999119	4.80288	-2.71983
358	5	Prevalence	4712	Riau	3	Both	27	Age-standardized	683	Periodontal diseases	3	Rate	1990	2021	-0.660835	2.62889	-4.81627
359	5	Prevalence	4714	South Sumatra	3	Both	27	Age-standardized	683	Periodontal diseases	3	Rate	1990	2021	0.506945	4.45593	-3.54892
360	5	Prevalence	573	Wyoming	3	Both	27	Age-standardized	683	Periodontal diseases	3	Rate	1990	2021	-2.39908	3.55478	-8.29954
361	5	Prevalence	562	Rhode Island	3	Both	27	Age-standardized	683	Periodontal diseases	3	Rate	1990	2021	-10.1072	29.2167	-39.8261
362	5	Prevalence	4665	Quintana Roo	3	Both	27	Age-standardized	683	Periodontal diseases	3	Rate	1990	2021	3.69092	7.96947	-0.430081
363	5	Prevalence	4663	Puebla	3	Both	27	Age-standardized	683	Periodontal diseases	3	Rate	1990	2021	3.22158	7.33995	-0.279098
364	5	Prevalence	4643	Aguascalientes	3	Both	27	Age-standardized	683	Periodontal diseases	3	Rate	1990	2021	-2.91773	33.0754	-27.524
365	5	Prevalence	4667	Sinaloa	3	Both	27	Age-standardized	683	Periodontal diseases	3	Rate	1990	2021	2.86063	7.58711	-1.16658
366	5	Prevalence	4721	West Java	3	Both	27	Age-standardized	683	Periodontal diseases	3	Rate	1990	2021	0.971419	5.37658	-3.37308
367	5	Prevalence	4710	North Sumatra	3	Both	27	Age-standardized	683	Periodontal diseases	3	Rate	1990	2021	3.58494	7.63994	0.135077
368	5	Prevalence	4737	Gorontalo	3	Both	27	Age-standardized	683	Periodontal diseases	3	Rate	1990	2021	1.13074	5.15981	-2.59339
369	5	Prevalence	4723	Yogyakarta	3	Both	27	Age-standardized	683	Periodontal diseases	3	Rate	1990	2021	3.48789	8.01954	-0.422626
370	5	Prevalence	4754	Bahia	3	Both	27	Age-standardized	683	Periodontal diseases	3	Rate	1990	2021	16.7565	24.9287	8.52133
371	5	Prevalence	4752	Amazonas	3	Both	27	Age-standardized	683	Periodontal diseases	3	Rate	1990	2021	10.487	17.4888	3.92277
372	5	Prevalence	4719	North Kalimantan	3	Both	27	Age-standardized	683	Periodontal diseases	3	Rate	1990	2021	2.45782	6.03403	-0.752294
373	5	Prevalence	4730	Central Kalimantan	3	Both	27	Age-standardized	683	Periodontal diseases	3	Rate	1990	2021	2.43164	6.7761	-1.61006
374	5	Prevalence	4739	Maluku	3	Both	27	Age-standardized	683	Periodontal diseases	3	Rate	1990	2021	-15.117	-9.53583	-22.203
375	5	Prevalence	4735	South Sulawesi	3	Both	27	Age-standardized	683	Periodontal diseases	3	Rate	1990	2021	3.2441	7.70263	-0.47823
376	5	Prevalence	4761	Mato Grosso do Sul	3	Both	27	Age-standardized	683	Periodontal diseases	3	Rate	1990	2021	16.7349	25.8712	9.24577
377	5	Prevalence	4763	Par谩	3	Both	27	Age-standardized	683	Periodontal diseases	3	Rate	1990	2021	16.1796	24.9913	8.37738
378	5	Prevalence	4733	North Sulawesi	3	Both	27	Age-standardized	683	Periodontal diseases	3	Rate	1990	2021	2.98474	7.16104	-0.385529
379	5	Prevalence	4674	Zacatecas	3	Both	27	Age-standardized	683	Periodontal diseases	3	Rate	1990	2021	0.98253	4.73675	-2.51341
380	5	Prevalence	4772	Rio Grande do Sul	3	Both	27	Age-standardized	683	Periodontal diseases	3	Rate	1990	2021	3.4036	41.2148	-24.6055
381	5	Prevalence	4750	Acre	3	Both	27	Age-standardized	683	Periodontal diseases	3	Rate	1990	2021	18.9447	28.2121	9.1333
382	5	Prevalence	4774	Sergipe	3	Both	27	Age-standardized	683	Periodontal diseases	3	Rate	1990	2021	10.319	37.3756	-8.00206
383	5	Prevalence	4850	Goa	3	Both	27	Age-standardized	683	Periodontal diseases	3	Rate	1990	2021	6.40907	39.3135	-18.5239
384	5	Prevalence	4852	Haryana	3	Both	27	Age-standardized	683	Periodontal diseases	3	Rate	1990	2021	-5.85641	15.3932	-25.9484
385	5	Prevalence	4731	South Kalimantan	3	Both	27	Age-standardized	683	Periodontal diseases	3	Rate	1990	2021	1.94389	6.22023	-1.79819
386	5	Prevalence	4862	Meghalaya	3	Both	27	Age-standardized	683	Periodontal diseases	3	Rate	1990	2021	11.831	24.2938	2.96837
387	5	Prevalence	4874	Uttarakhand	3	Both	27	Age-standardized	683	Periodontal diseases	3	Rate	1990	2021	13.7242	42.4991	-5.10399
388	5	Prevalence	4745		3	Both	27	Age-standardized	683	Periodontal diseases	3	Rate	1990	2021	7.10514	49.7717	-23.9883
389	5	Prevalence	4759	Maranh茫o	3	Both	27	Age-standardized	683	Periodontal diseases	3	Rate	1990	2021	26.5723	38.0757	15.5626
390	5	Prevalence	4757	Esp铆rito Santo	3	Both	27	Age-standardized	683	Periodontal diseases	3	Rate	1990	2021	19.0203	30.9702	10.6183
391	5	Prevalence	4742	Papua	3	Both	27	Age-standardized	683	Periodontal diseases	3	Rate	1990	2021	0.00268562	3.33855	-3.98676
392	5	Prevalence	4770	Rond么nia	3	Both	27	Age-standardized	683	Periodontal diseases	3	Rate	1990	2021	8.46808	61.2671	-24.2718
393	5	Prevalence	4864	Nagaland	3	Both	27	Age-standardized	683	Periodontal diseases	3	Rate	1990	2021	11.9765	30.5298	-1.7913
394	5	Prevalence	4910	Oslo	3	Both	27	Age-standardized	683	Periodontal diseases	3	Rate	1990	2021	-7.76757	19.5739	-29.5598
395	5	Prevalence	4846	Chhattisgarh	3	Both	27	Age-standardized	683	Periodontal diseases	3	Rate	1990	2021	12.2565	24.6883	2.14001
396	5	Prevalence	4766	Pernambuco	3	Both	27	Age-standardized	683	Periodontal diseases	3	Rate	1990	2021	17.8412	25.4757	9.97471
397	5	Prevalence	4768	Rio de Janeiro	3	Both	27	Age-standardized	683	Periodontal diseases	3	Rate	1990	2021	8.28624	15.1877	1.7606
398	5	Prevalence	4738	West Sulawesi	3	Both	27	Age-standardized	683	Periodontal diseases	3	Rate	1990	2021	0.23676	4.30886	-3.57443
399	5	Prevalence	4860	Maharashtra	3	Both	27	Age-standardized	683	Periodontal diseases	3	Rate	1990	2021	10.8452	29.128	-2.69362
400	5	Prevalence	4841	Andhra Pradesh	3	Both	27	Age-standardized	683	Periodontal diseases	3	Rate	1990	2021	9.30724	47.8452	-18.0706
401	5	Prevalence	4872	Tripura	3	Both	27	Age-standardized	683	Periodontal diseases	3	Rate	1990	2021	7.40922	47.8602	-20.4661
402	5	Prevalence	4755	Cear谩	3	Both	27	Age-standardized	683	Periodontal diseases	3	Rate	1990	2021	22.045	31.6646	11.5001
403	5	Prevalence	4857	Kerala	3	Both	27	Age-standardized	683	Periodontal diseases	3	Rate	1990	2021	10.479	50.315	-15.9154
404	5	Prevalence	4843	Assam	3	Both	27	Age-standardized	683	Periodontal diseases	3	Rate	1990	2021	6.73105	29.5833	-9.85627
405	5	Prevalence	4855	Jharkhand	3	Both	27	Age-standardized	683	Periodontal diseases	3	Rate	1990	2021	10.0789	22.3745	0.977074
406	5	Prevalence	4753	Amap谩	3	Both	27	Age-standardized	683	Periodontal diseases	3	Rate	1990	2021	14.1739	22.5307	7.40283
407	5	Prevalence	4926	Nordland	3	Both	27	Age-standardized	683	Periodontal diseases	3	Rate	1990	2021	-6.99585	22.4859	-29.4204
408	5	Prevalence	4773	Santa Catarina	3	Both	27	Age-standardized	683	Periodontal diseases	3	Rate	1990	2021	7.32103	57.7461	-23.9124
409	5	Prevalence	4851	Gujarat	3	Both	27	Age-standardized	683	Periodontal diseases	3	Rate	1990	2021	5.64923	44.6434	-20.8724
410	5	Prevalence	4740	North Maluku	3	Both	27	Age-standardized	683	Periodontal diseases	3	Rate	1990	2021	-0.897492	3.93162	-5.45203
411	5	Prevalence	4762	Mato Grosso	3	Both	27	Age-standardized	683	Periodontal diseases	3	Rate	1990	2021	21.6335	32.4828	11.9922
412	5	Prevalence	4870	Tamil Nadu	3	Both	27	Age-standardized	683	Periodontal diseases	3	Rate	1990	2021	12.5232	35.4101	-3.18163
413	5	Prevalence	4734	Central Sulawesi	3	Both	27	Age-standardized	683	Periodontal diseases	3	Rate	1990	2021	6.56981	11.8366	1.96928
414	5	Prevalence	4751	Alagoas	3	Both	27	Age-standardized	683	Periodontal diseases	3	Rate	1990	2021	17.642	26.1077	9.5293
415	5	Prevalence	4775	S茫o Paulo	3	Both	27	Age-standardized	683	Periodontal diseases	3	Rate	1990	2021	20.3961	48.8004	-2.16871
416	5	Prevalence	4944	Stockholm	3	Both	27	Age-standardized	683	Periodontal diseases	3	Rate	1990	2021	-14.6886	23.0996	-39.7855
417	5	Prevalence	4764	Para铆ba	3	Both	27	Age-standardized	683	Periodontal diseases	3	Rate	1990	2021	22.5068	33.2342	13.0455
418	5	Prevalence	4853	Himachal Pradesh	3	Both	27	Age-standardized	683	Periodontal diseases	3	Rate	1990	2021	17.0322	27.9536	8.80452
419	5	Prevalence	4736	Southeast Sulawesi	3	Both	27	Age-standardized	683	Periodontal diseases	3	Rate	1990	2021	4.93438	9.70265	0.580495
420	5	Prevalence	4868	Rajasthan	3	Both	27	Age-standardized	683	Periodontal diseases	3	Rate	1990	2021	9.84172	40.1756	-9.88597
421	5	Prevalence	4749	England	3	Both	27	Age-standardized	683	Periodontal diseases	3	Rate	1990	2021	-11.6766	26.483	-35.1434
422	5	Prevalence	4875	West Bengal	3	Both	27	Age-standardized	683	Periodontal diseases	3	Rate	1990	2021	4.58619	41.8483	-22.8596
423	5	Prevalence	4732	East Kalimantan	3	Both	27	Age-standardized	683	Periodontal diseases	3	Rate	1990	2021	2.99585	6.86429	-0.855305
424	5	Prevalence	4758	Goi谩s	3	Both	27	Age-standardized	683	Periodontal diseases	3	Rate	1990	2021	20.8824	31.2595	12.234
425	5	Prevalence	4760	Minas Gerais	3	Both	27	Age-standardized	683	Periodontal diseases	3	Rate	1990	2021	15.9317	24.1824	8.04735
426	5	Prevalence	4863	Mizoram	3	Both	27	Age-standardized	683	Periodontal diseases	3	Rate	1990	2021	11.2087	34.474	-4.69664
427	5	Prevalence	4865	Odisha	3	Both	27	Age-standardized	683	Periodontal diseases	3	Rate	1990	2021	6.87463	46.0335	-21.4573
428	5	Prevalence	4849	Delhi	3	Both	27	Age-standardized	683	Periodontal diseases	3	Rate	1990	2021	5.08761	38.8321	-19.9132
429	5	Prevalence	4743	European Union	3	Both	27	Age-standardized	683	Periodontal diseases	3	Rate	1990	2021	-7.46659	24.6751	-32.2039
430	5	Prevalence	4771	Roraima	3	Both	27	Age-standardized	683	Periodontal diseases	3	Rate	1990	2021	5.64475	59.5505	-26.1387
431	5	Prevalence	4767	Piaui	3	Both	27	Age-standardized	683	Periodontal diseases	3	Rate	1990	2021	25.6872	36.8438	14.9908
432	5	Prevalence	4769	Rio Grande do Norte	3	Both	27	Age-standardized	683	Periodontal diseases	3	Rate	1990	2021	20.5792	29.6235	11.7652
433	5	Prevalence	4920	Rogaland	3	Both	27	Age-standardized	683	Periodontal diseases	3	Rate	1990	2021	-7.18401	21.4695	-29.5228
434	5	Prevalence	4873	Uttar Pradesh	3	Both	27	Age-standardized	683	Periodontal diseases	3	Rate	1990	2021	3.81303	32.9347	-16.3611
435	5	Prevalence	4861	Manipur	3	Both	27	Age-standardized	683	Periodontal diseases	3	Rate	1990	2021	1.79547	40.2031	-26.1042
436	5	Prevalence	4756	Distrito Federal	3	Both	27	Age-standardized	683	Periodontal diseases	3	Rate	1990	2021	21.1585	32.7305	11.3239
437	5	Prevalence	4859	Madhya Pradesh	3	Both	27	Age-standardized	683	Periodontal diseases	3	Rate	1990	2021	6.97685	19.0297	-2.24175
438	5	Prevalence	4842	Arunachal Pradesh	3	Both	27	Age-standardized	683	Periodontal diseases	3	Rate	1990	2021	5.71797	42.9343	-20.055
439	5	Prevalence	4844	Bihar	3	Both	27	Age-standardized	683	Periodontal diseases	3	Rate	1990	2021	4.8258	12.6507	-1.28331
440	5	Prevalence	4940	Sweden except Stockholm	3	Both	27	Age-standardized	683	Periodontal diseases	3	Rate	1990	2021	-13.8631	25.4933	-39.8123
441	5	Prevalence	4856	Karnataka	3	Both	27	Age-standardized	683	Periodontal diseases	3	Rate	1990	2021	15.5205	35.9077	1.90375
442	5	Prevalence	4765	Paran谩	3	Both	27	Age-standardized	683	Periodontal diseases	3	Rate	1990	2021	14.7357	23.3076	8.14451
443	5	Prevalence	4871	Telangana	3	Both	27	Age-standardized	683	Periodontal diseases	3	Rate	1990	2021	10.6367	47.9052	-17.1565
444	5	Prevalence	4741	West Papua	3	Both	27	Age-standardized	683	Periodontal diseases	3	Rate	1990	2021	5.23905	10.4568	1.29686
445	5	Prevalence	4854	Jammu & Kashmir and Ladakh	3	Both	27	Age-standardized	683	Periodontal diseases	3	Rate	1990	2021	5.77349	45.167	-21.8377
446	5	Prevalence	4776	Tocantins	3	Both	27	Age-standardized	683	Periodontal diseases	3	Rate	1990	2021	15.4874	73.7287	-20.7552
447	5	Prevalence	4869	Sikkim	3	Both	27	Age-standardized	683	Periodontal diseases	3	Rate	1990	2021	19.1501	46.5104	1.15247
448	5	Prevalence	4867	Punjab	3	Both	27	Age-standardized	683	Periodontal diseases	3	Rate	1990	2021	8.94184	26.8978	-3.13494
449	5	Prevalence	4923	M酶re og Romsdal	3	Both	27	Age-standardized	683	Periodontal diseases	3	Rate	1990	2021	-6.83234	20.8809	-29.0634
450	5	Prevalence	35434	Saitama	3	Both	27	Age-standardized	683	Periodontal diseases	3	Rate	1990	2021	0.95177	55.637	-31.1128
451	5	Prevalence	35432	Tochigi	3	Both	27	Age-standardized	683	Periodontal diseases	3	Rate	1990	2021	1.29837	54.5682	-30.8608
452	5	Prevalence	35443	Nagano	3	Both	27	Age-standardized	683	Periodontal diseases	3	Rate	1990	2021	2.26203	50.6815	-29.8711
453	5	Prevalence	35445	Shizuoka	3	Both	27	Age-standardized	683	Periodontal diseases	3	Rate	1990	2021	2.18523	55.0707	-30.1727
454	5	Prevalence	35456	Okayama	3	Both	27	Age-standardized	683	Periodontal diseases	3	Rate	1990	2021	1.64925	54.8215	-30.7692
455	5	Prevalence	35428	Akita	3	Both	27	Age-standardized	683	Periodontal diseases	3	Rate	1990	2021	3.03049	55.8222	-31.0085
456	5	Prevalence	35454	Tottori	3	Both	27	Age-standardized	683	Periodontal diseases	3	Rate	1990	2021	0.360681	47.9283	-32.0046
457	5	Prevalence	35426	Iwate	3	Both	27	Age-standardized	683	Periodontal diseases	3	Rate	1990	2021	4.41087	58.2761	-28.5324
458	5	Prevalence	35441	Fukui	3	Both	27	Age-standardized	683	Periodontal diseases	3	Rate	1990	2021	1.42346	52.6839	-31.6496
459	5	Prevalence	35452	Nara	3	Both	27	Age-standardized	683	Periodontal diseases	3	Rate	1990	2021	2.28242	54.6078	-31.03
460	5	Prevalence	35448	Shiga	3	Both	27	Age-standardized	683	Periodontal diseases	3	Rate	1990	2021	0.465785	49.0095	-31.049
461	5	Prevalence	35465	Nagasaki	3	Both	27	Age-standardized	683	Periodontal diseases	3	Rate	1990	2021	4.01766	56.4758	-30.6892
462	5	Prevalence	35463	Fukuoka	3	Both	27	Age-standardized	683	Periodontal diseases	3	Rate	1990	2021	1.85887	50.2031	-30.8569
463	5	Prevalence	35459	Tokushima	3	Both	27	Age-standardized	683	Periodontal diseases	3	Rate	1990	2021	5.51831	57.7026	-28.2899
464	5	Prevalence	35439	Toyama	3	Both	27	Age-standardized	683	Periodontal diseases	3	Rate	1990	2021	1.61901	48.5758	-29.583
465	5	Prevalence	35634	Kitui	3	Both	27	Age-standardized	683	Periodontal diseases	3	Rate	1990	2021	-8.16927	19.6467	-29.5063
466	5	Prevalence	35621	Elgeyo-Marakwet	3	Both	27	Age-standardized	683	Periodontal diseases	3	Rate	1990	2021	-8.64212	20.363	-30.9574
467	5	Prevalence	35433	Gunma	3	Both	27	Age-standardized	683	Periodontal diseases	3	Rate	1990	2021	2.58368	52.6442	-30.4428
468	5	Prevalence	35623	Garissa	3	Both	27	Age-standardized	683	Periodontal diseases	3	Rate	1990	2021	-8.14347	21.4168	-29.7221
469	5	Prevalence	35632	Kisii	3	Both	27	Age-standardized	683	Periodontal diseases	3	Rate	1990	2021	-8.22534	20.1602	-30.0057
470	5	Prevalence	35435	Chiba	3	Both	27	Age-standardized	683	Periodontal diseases	3	Rate	1990	2021	1.9712	50.8334	-30.3229
471	5	Prevalence	35430	Fukushima	3	Both	27	Age-standardized	683	Periodontal diseases	3	Rate	1990	2021	2.73682	50.7661	-29.8891
472	5	Prevalence	35470	Okinawa	3	Both	27	Age-standardized	683	Periodontal diseases	3	Rate	1990	2021	2.82582	54.716	-30.6927
473	5	Prevalence	35444	Gifu	3	Both	27	Age-standardized	683	Periodontal diseases	3	Rate	1990	2021	2.18928	51.5476	-30.1351
474	5	Prevalence	35461	Ehime	3	Both	27	Age-standardized	683	Periodontal diseases	3	Rate	1990	2021	3.88186	54.1185	-29.3791
475	5	Prevalence	35446	Aichi	3	Both	27	Age-standardized	683	Periodontal diseases	3	Rate	1990	2021	1.38631	53.1288	-30.5516
476	5	Prevalence	35645	Murang'a	3	Both	27	Age-standardized	683	Periodontal diseases	3	Rate	1990	2021	-8.73606	16.8415	-30.0749
477	5	Prevalence	35630	Kilifi	3	Both	27	Age-standardized	683	Periodontal diseases	3	Rate	1990	2021	-8.64786	18.4205	-29.7468
478	5	Prevalence	35643	Migori	3	Both	27	Age-standardized	683	Periodontal diseases	3	Rate	1990	2021	-8.81216	19.1355	-29.5805
479	5	Prevalence	35437	Kanagawa	3	Both	27	Age-standardized	683	Periodontal diseases	3	Rate	1990	2021	-0.0152776	49.8584	-31.3815
480	5	Prevalence	35617	Baringo	3	Both	27	Age-standardized	683	Periodontal diseases	3	Rate	1990	2021	-9.69081	18.5944	-31.0801
481	5	Prevalence	35450	艑saka	3	Both	27	Age-standardized	683	Periodontal diseases	3	Rate	1990	2021	-0.223046	46.7261	-30.839
482	5	Prevalence	35429	Yamagata	3	Both	27	Age-standardized	683	Periodontal diseases	3	Rate	1990	2021	2.51793	54.6955	-29.5251
483	5	Prevalence	35641	Marsabit	3	Both	27	Age-standardized	683	Periodontal diseases	3	Rate	1990	2021	-8.34013	21.2436	-30.0661
484	5	Prevalence	35637	Lamu	3	Both	27	Age-standardized	683	Periodontal diseases	3	Rate	1990	2021	-8.82197	19.3252	-29.8376
485	5	Prevalence	35424	Hokkaid艒	3	Both	27	Age-standardized	683	Periodontal diseases	3	Rate	1990	2021	1.48437	49.4095	-30.6136
486	5	Prevalence	35628	Kericho	3	Both	27	Age-standardized	683	Periodontal diseases	3	Rate	1990	2021	-8.48151	18.8641	-30.1958
487	5	Prevalence	35427	Miyagi	3	Both	27	Age-standardized	683	Periodontal diseases	3	Rate	1990	2021	0.579625	50.0439	-31.7894
488	5	Prevalence	35453	Wakayama	3	Both	27	Age-standardized	683	Periodontal diseases	3	Rate	1990	2021	4.58085	57.5756	-30.0513
489	5	Prevalence	35442	Yamanashi	3	Both	27	Age-standardized	683	Periodontal diseases	3	Rate	1990	2021	1.74171	51.066	-30.4818
490	5	Prevalence	35626	Kajiado	3	Both	27	Age-standardized	683	Periodontal diseases	3	Rate	1990	2021	-3.57193	0.555246	-7.38553
491	5	Prevalence	35455	Shimane	3	Both	27	Age-standardized	683	Periodontal diseases	3	Rate	1990	2021	4.84401	59.4601	-28.6133
492	5	Prevalence	35654	Siaya	3	Both	27	Age-standardized	683	Periodontal diseases	3	Rate	1990	2021	-7.96867	20.9945	-30.3006
493	5	Prevalence	35464	Saga	3	Both	27	Age-standardized	683	Periodontal diseases	3	Rate	1990	2021	2.85375	56.7795	-30.3339
494	5	Prevalence	35652	Nyeri	3	Both	27	Age-standardized	683	Periodontal diseases	3	Rate	1990	2021	-8.6349	20.195	-30.4368
495	5	Prevalence	35466	Kumamoto	3	Both	27	Age-standardized	683	Periodontal diseases	3	Rate	1990	2021	1.7842	50.934	-31.024
496	5	Prevalence	35449	Ky艒to	3	Both	27	Age-standardized	683	Periodontal diseases	3	Rate	1990	2021	1.54991	51.167	-30.7916
497	5	Prevalence	35460	Kagawa	3	Both	27	Age-standardized	683	Periodontal diseases	3	Rate	1990	2021	2.94234	54.5642	-28.9202
498	5	Prevalence	35440	Ishikawa	3	Both	27	Age-standardized	683	Periodontal diseases	3	Rate	1990	2021	1.69326	52.2612	-29.9029
499	5	Prevalence	35639	Makueni	3	Both	27	Age-standardized	683	Periodontal diseases	3	Rate	1990	2021	-8.85238	19.7679	-31.2214
500	5	Prevalence	35622	Embu	3	Both	27	Age-standardized	683	Periodontal diseases	3	Rate	1990	2021	-7.91053	18.3727	-29.1516
501	5	Prevalence	35650	Nyamira	3	Both	27	Age-standardized	683	Periodontal diseases	3	Rate	1990	2021	-7.98926	21.0366	-29.626
502	5	Prevalence	35431	Ibaraki	3	Both	27	Age-standardized	683	Periodontal diseases	3	Rate	1990	2021	2.98946	54.0618	-29.4296
503	5	Prevalence	35663	West Pokot	3	Both	27	Age-standardized	683	Periodontal diseases	3	Rate	1990	2021	-9.64478	19.0913	-30.6041
504	5	Prevalence	35635	Kwale	3	Both	27	Age-standardized	683	Periodontal diseases	3	Rate	1990	2021	-8.29739	19.497	-29.8271
505	5	Prevalence	35624	Homa Bay	3	Both	27	Age-standardized	683	Periodontal diseases	3	Rate	1990	2021	-8.91128	20.9328	-31.046
506	5	Prevalence	35436	T艒ky艒	3	Both	27	Age-standardized	683	Periodontal diseases	3	Rate	1990	2021	0.460834	49.7089	-31.5159
507	5	Prevalence	35648	Nandi	3	Both	27	Age-standardized	683	Periodontal diseases	3	Rate	1990	2021	-9.15687	16.6048	-30.1866
508	5	Prevalence	35619	Bungoma	3	Both	27	Age-standardized	683	Periodontal diseases	3	Rate	1990	2021	-8.75002	20.2663	-30.5862
509	5	Prevalence	35468	Miyazaki	3	Both	27	Age-standardized	683	Periodontal diseases	3	Rate	1990	2021	4.39181	59.4413	-28.7936
510	5	Prevalence	35633	Kisumu	3	Both	27	Age-standardized	683	Periodontal diseases	3	Rate	1990	2021	-8.9945	18.2423	-29.8878
511	5	Prevalence	44591	World Bank Income Levels	3	Both	27	Age-standardized	683	Periodontal diseases	3	Rate	1990	2021	1.75917	26.6342	-15.5462
512	5	Prevalence	35661	Vihiga	3	Both	27	Age-standardized	683	Periodontal diseases	3	Rate	1990	2021	-8.82011	19.7637	-31.033
513	5	Prevalence	35631	Kirinyaga	3	Both	27	Age-standardized	683	Periodontal diseases	3	Rate	1990	2021	-7.92652	19.6045	-29.0861
514	5	Prevalence	35462	K艒chi	3	Both	27	Age-standardized	683	Periodontal diseases	3	Rate	1990	2021	3.06179	52.4484	-30.0491
515	5	Prevalence	35646	Nairobi	3	Both	27	Age-standardized	683	Periodontal diseases	3	Rate	1990	2021	-8.15941	16.2033	-28.8755
516	5	Prevalence	35644	Mombasa	3	Both	27	Age-standardized	683	Periodontal diseases	3	Rate	1990	2021	-8.44179	19.2725	-29.6684
517	5	Prevalence	35447	Mie	3	Both	27	Age-standardized	683	Periodontal diseases	3	Rate	1990	2021	4.25025	52.1951	-28.1156
518	5	Prevalence	44568	Western Pacific Region	3	Both	27	Age-standardized	683	Periodontal diseases	3	Rate	1990	2021	-3.71619	16.9964	-17.7536
519	5	Prevalence	44566	European Region	3	Both	27	Age-standardized	683	Periodontal diseases	3	Rate	1990	2021	-3.39184	32.9591	-30.2838
520	5	Prevalence	35659	Turkana	3	Both	27	Age-standardized	683	Periodontal diseases	3	Rate	1990	2021	-10.1704	18.2141	-32.1763
521	5	Prevalence	35657	Tharaka Nithi	3	Both	27	Age-standardized	683	Periodontal diseases	3	Rate	1990	2021	-8.11114	19.4254	-29.3063
522	5	Prevalence	35642	Meru	3	Both	27	Age-standardized	683	Periodontal diseases	3	Rate	1990	2021	-8.0831	19.4177	-29.6209
523	5	Prevalence	35618	Bomet	3	Both	27	Age-standardized	683	Periodontal diseases	3	Rate	1990	2021	-9.08443	17.9958	-29.3958
524	5	Prevalence	44535	Commonwealth High Income	3	Both	27	Age-standardized	683	Periodontal diseases	3	Rate	1990	2021	3.15716	47.4328	-25.5878
525	5	Prevalence	35629	Kiambu	3	Both	27	Age-standardized	683	Periodontal diseases	3	Rate	1990	2021	-8.449	19.9929	-30.1326
526	5	Prevalence	35451	Hy艒go	3	Both	27	Age-standardized	683	Periodontal diseases	3	Rate	1990	2021	0.255748	50.6259	-29.8761
527	5	Prevalence	44635	High SDI	3	Both	27	Age-standardized	683	Periodontal diseases	3	Rate	1990	2021	-0.911856	30.0463	-22.9037
528	5	Prevalence	35457	Hiroshima	3	Both	27	Age-standardized	683	Periodontal diseases	3	Rate	1990	2021	0.824296	49.2034	-30.6326
529	5	Prevalence	35627	Kakamega	3	Both	27	Age-standardized	683	Periodontal diseases	3	Rate	1990	2021	-8.87943	19.2899	-30.3217
530	5	Prevalence	35638	Machakos	3	Both	27	Age-standardized	683	Periodontal diseases	3	Rate	1990	2021	-8.6135	17.8627	-30.2801
531	5	Prevalence	44646	Newcastle upon Tyne	3	Both	27	Age-standardized	683	Periodontal diseases	3	Rate	1990	2021	-14.8709	39.623	-46.5332
532	5	Prevalence	35653	Samburu	3	Both	27	Age-standardized	683	Periodontal diseases	3	Rate	1990	2021	-10.1076	19.2003	-32.3357
533	5	Prevalence	35655	Taita Taveta	3	Both	27	Age-standardized	683	Periodontal diseases	3	Rate	1990	2021	-8.03798	19.3472	-29.4169
534	5	Prevalence	44648	Redcar and Cleveland	3	Both	27	Age-standardized	683	Periodontal diseases	3	Rate	1990	2021	-14.8923	37.1285	-46.5106
535	5	Prevalence	44537	Commonwealth Low Income	3	Both	27	Age-standardized	683	Periodontal diseases	3	Rate	1990	2021	-11.4721	18.2798	-33.0354
536	5	Prevalence	44564	Region of the Americas	3	Both	27	Age-standardized	683	Periodontal diseases	3	Rate	1990	2021	3.02227	28.955	-14.9123
537	5	Prevalence	35467	艑ita	3	Both	27	Age-standardized	683	Periodontal diseases	3	Rate	1990	2021	3.31334	54.6572	-29.1942
538	5	Prevalence	35438	Niigata	3	Both	27	Age-standardized	683	Periodontal diseases	3	Rate	1990	2021	1.95814	48.3133	-30.1499
539	5	Prevalence	44577	World Bank Lower Middle Income	3	Both	27	Age-standardized	683	Periodontal diseases	3	Rate	1990	2021	-1.86899	20.7862	-18.5302
540	5	Prevalence	35636	Laikipia	3	Both	27	Age-standardized	683	Periodontal diseases	3	Rate	1990	2021	-7.8846	16.8592	-28.5787
541	5	Prevalence	44587	African Union	3	Both	27	Age-standardized	683	Periodontal diseases	3	Rate	1990	2021	-27.803	-9.31467	-41.1513
542	5	Prevalence	35640	Mandera	3	Both	27	Age-standardized	683	Periodontal diseases	3	Rate	1990	2021	-8.36052	21.0006	-31.0824
543	5	Prevalence	35651	Nyandarua	3	Both	27	Age-standardized	683	Periodontal diseases	3	Rate	1990	2021	-8.4397	19.2118	-28.9866
544	5	Prevalence	44655	Cheshire East	3	Both	27	Age-standardized	683	Periodontal diseases	3	Rate	1990	2021	-13.851	38.043	-44.8694
545	5	Prevalence	44560	America	3	Both	27	Age-standardized	683	Periodontal diseases	3	Rate	1990	2021	3.02227	28.955	-14.9123
546	5	Prevalence	35625	Isiolo	3	Both	27	Age-standardized	683	Periodontal diseases	3	Rate	1990	2021	-9.62139	20.6479	-31.0629
547	5	Prevalence	44562	Europe	3	Both	27	Age-standardized	683	Periodontal diseases	3	Rate	1990	2021	-2.87558	33.1808	-29.5279
548	5	Prevalence	44644	Northumberland	3	Both	27	Age-standardized	683	Periodontal diseases	3	Rate	1990	2021	-15.4323	34.0517	-47.2709
549	5	Prevalence	44584	OECD Countries	3	Both	27	Age-standardized	683	Periodontal diseases	3	Rate	1990	2021	1.52453	35.3303	-22.5425
550	5	Prevalence	35649	Narok	3	Both	27	Age-standardized	683	Periodontal diseases	3	Rate	1990	2021	-9.86818	17.9293	-32.0069
551	5	Prevalence	44534	Commonwealth	3	Both	27	Age-standardized	683	Periodontal diseases	3	Rate	1990	2021	-1.63895	22.5828	-19.4766
552	5	Prevalence	44651	Middlesbrough	3	Both	27	Age-standardized	683	Periodontal diseases	3	Rate	1990	2021	-14.6015	40.2874	-46.4757
553	5	Prevalence	44657	Trafford	3	Both	27	Age-standardized	683	Periodontal diseases	3	Rate	1990	2021	-16.3162	34.1273	-46.2417
554	5	Prevalence	44666	Warrington	3	Both	27	Age-standardized	683	Periodontal diseases	3	Rate	1990	2021	-14.9447	36.8598	-46.1129
555	5	Prevalence	44634	High-middle SDI	3	Both	27	Age-standardized	683	Periodontal diseases	3	Rate	1990	2021	-0.744163	33.1193	-22.5372
556	5	Prevalence	44659	Sefton	3	Both	27	Age-standardized	683	Periodontal diseases	3	Rate	1990	2021	-17.418	32.5057	-48.4633
557	5	Prevalence	35620	Busia	3	Both	27	Age-standardized	683	Periodontal diseases	3	Rate	1990	2021	-9.24209	18.8682	-30.2557
558	5	Prevalence	35662	Wajir	3	Both	27	Age-standardized	683	Periodontal diseases	3	Rate	1990	2021	-9.06604	20.8165	-31.0431
559	5	Prevalence	44638	North America	3	Both	27	Age-standardized	683	Periodontal diseases	3	Rate	1990	2021	-5.76277	17.6347	-21.6847
560	5	Prevalence	35425	Aomori	3	Both	27	Age-standardized	683	Periodontal diseases	3	Rate	1990	2021	4.2579	57.419	-29.3772
561	5	Prevalence	44677	Manchester	3	Both	27	Age-standardized	683	Periodontal diseases	3	Rate	1990	2021	-16.4804	36.6972	-47.4821
562	5	Prevalence	44642	Nordic Region	3	Both	27	Age-standardized	683	Periodontal diseases	3	Rate	1990	2021	-7.34068	21.6051	-28.6875
563	5	Prevalence	35647	Nakuru	3	Both	27	Age-standardized	683	Periodontal diseases	3	Rate	1990	2021	-8.1056	19.6945	-28.8992
564	5	Prevalence	44668	Rochdale	3	Both	27	Age-standardized	683	Periodontal diseases	3	Rate	1990	2021	-17.6957	30.5448	-48.4175
565	5	Prevalence	44653	Sunderland	3	Both	27	Age-standardized	683	Periodontal diseases	3	Rate	1990	2021	-13.8618	39.8143	-46.8499
566	5	Prevalence	44575	World Bank High Income	3	Both	27	Age-standardized	683	Periodontal diseases	3	Rate	1990	2021	-3.26956	30.7856	-26.8297
567	5	Prevalence	44567	Eastern Mediterranean Region	3	Both	27	Age-standardized	683	Periodontal diseases	3	Rate	1990	2021	4.50398	32.1813	-16.6287
568	5	Prevalence	44559	Africa	3	Both	27	Age-standardized	683	Periodontal diseases	3	Rate	1990	2021	-27.803	-9.31467	-41.1513
569	5	Prevalence	44679	East Riding of Yorkshire	3	Both	27	Age-standardized	683	Periodontal diseases	3	Rate	1990	2021	-17.3889	34.6196	-48.4081
570	5	Prevalence	35660	Uasin Gishu	3	Both	27	Age-standardized	683	Periodontal diseases	3	Rate	1990	2021	-9.14802	16.64	-30.2587
571	5	Prevalence	35658	Trans Nzoia	3	Both	27	Age-standardized	683	Periodontal diseases	3	Rate	1990	2021	-9.21127	16.4503	-30.5623
572	5	Prevalence	35469	Kagoshima	3	Both	27	Age-standardized	683	Periodontal diseases	3	Rate	1990	2021	4.90166	57.9616	-29.0199
573	5	Prevalence	44536	Commonwealth Middle Income	3	Both	27	Age-standardized	683	Periodontal diseases	3	Rate	1990	2021	-2.47674	19.318	-18.7224
574	5	Prevalence	44636	Low-middle SDI	3	Both	27	Age-standardized	683	Periodontal diseases	3	Rate	1990	2021	2.07497	27.2213	-16.7725
575	5	Prevalence	35458	Yamaguchi	3	Both	27	Age-standardized	683	Periodontal diseases	3	Rate	1990	2021	3.39182	53.3944	-30.0915
576	5	Prevalence	44662	Bolton	3	Both	27	Age-standardized	683	Periodontal diseases	3	Rate	1990	2021	-17.503	34.8492	-48.1706
577	5	Prevalence	35656	Tana River	3	Both	27	Age-standardized	683	Periodontal diseases	3	Rate	1990	2021	-8.14391	21.3986	-30.826
578	5	Prevalence	44647	North Tyneside	3	Both	27	Age-standardized	683	Periodontal diseases	3	Rate	1990	2021	-13.3455	40.8596	-45.9238
579	5	Prevalence	44538	Other Union Territories	3	Both	27	Age-standardized	683	Periodontal diseases	3	Rate	1990	2021	3.75001	34.8155	-20.7404
580	5	Prevalence	44565	South-East Asia Region	3	Both	27	Age-standardized	683	Periodontal diseases	3	Rate	1990	2021	7.07766	31.3833	-9.57549
581	5	Prevalence	44675	Knowsley	3	Both	27	Age-standardized	683	Periodontal diseases	3	Rate	1990	2021	-11.3054	41.5511	-43.9041
582	5	Prevalence	44673	Salford	3	Both	27	Age-standardized	683	Periodontal diseases	3	Rate	1990	2021	-15.38	39.5327	-47.0181
583	5	Prevalence	44701	Leicester	3	Both	27	Age-standardized	683	Periodontal diseases	3	Rate	1990	2021	-18.5434	30.5283	-48.282
584	5	Prevalence	44671	Liverpool	3	Both	27	Age-standardized	683	Periodontal diseases	3	Rate	1990	2021	-15.3771	37.9188	-46.5614
585	5	Prevalence	44578	World Bank Low Income	3	Both	27	Age-standardized	683	Periodontal diseases	3	Rate	1990	2021	-24.1684	-7.80583	-35.1591
586	5	Prevalence	44664	Bury	3	Both	27	Age-standardized	683	Periodontal diseases	3	Rate	1990	2021	-16.3157	34.88	-47.0618
587	5	Prevalence	44649	County Durham	3	Both	27	Age-standardized	683	Periodontal diseases	3	Rate	1990	2021	-14.7983	36.3025	-46.0203
588	5	Prevalence	44656	Stockport	3	Both	27	Age-standardized	683	Periodontal diseases	3	Rate	1990	2021	-16.4358	35.8131	-47.1213
589	5	Prevalence	44590	Four World Regions	3	Both	27	Age-standardized	683	Periodontal diseases	3	Rate	1990	2021	1.77885	26.6656	-15.5297
590	5	Prevalence	44682	Calderdale	3	Both	27	Age-standardized	683	Periodontal diseases	3	Rate	1990	2021	-15.9961	37.2458	-47.6632
591	5	Prevalence	44561	Asia	3	Both	27	Age-standardized	683	Periodontal diseases	3	Rate	1990	2021	6.13364	30.2853	-10.1936
592	5	Prevalence	44699	Nottinghamshire	3	Both	27	Age-standardized	683	Periodontal diseases	3	Rate	1990	2021	-16.3572	35.1163	-47.9204
593	5	Prevalence	44586	G20	3	Both	27	Age-standardized	683	Periodontal diseases	3	Rate	1990	2021	6.8518	32.0738	-9.97608
594	5	Prevalence	44710	Telford and Wrekin	3	Both	27	Age-standardized	683	Periodontal diseases	3	Rate	1990	2021	-19.5678	27.6815	-48.2794
595	5	Prevalence	44712	Walsall	3	Both	27	Age-standardized	683	Periodontal diseases	3	Rate	1990	2021	-18.9532	26.6875	-49.1128
596	5	Prevalence	44563	African Region	3	Both	27	Age-standardized	683	Periodontal diseases	3	Rate	1990	2021	-33.2896	-17.7851	-44.8889
597	5	Prevalence	44645	Stockton-on-Tees	3	Both	27	Age-standardized	683	Periodontal diseases	3	Rate	1990	2021	-16.5771	32.107	-47.4826
598	5	Prevalence	44690	Doncaster	3	Both	27	Age-standardized	683	Periodontal diseases	3	Rate	1990	2021	-14.8446	38.3596	-45.8223
599	5	Prevalence	44686	Leeds	3	Both	27	Age-standardized	683	Periodontal diseases	3	Rate	1990	2021	-16.2624	36.5403	-47.4799
600	5	Prevalence	44667	Oldham	3	Both	27	Age-standardized	683	Periodontal diseases	3	Rate	1990	2021	-17.3942	36.3446	-47.8877
601	5	Prevalence	44652	South Tyneside	3	Both	27	Age-standardized	683	Periodontal diseases	3	Rate	1990	2021	-12.5243	40.3924	-44.3229
602	5	Prevalence	44723	Norfolk	3	Both	27	Age-standardized	683	Periodontal diseases	3	Rate	1990	2021	-15.8985	35.0867	-47.1626
603	5	Prevalence	44658	Cheshire West and Chester	3	Both	27	Age-standardized	683	Periodontal diseases	3	Rate	1990	2021	-15.5447	36.788	-47.4763
604	5	Prevalence	44697	Derby	3	Both	27	Age-standardized	683	Periodontal diseases	3	Rate	1990	2021	-15.8933	34.9109	-47.8635
605	5	Prevalence	44639	Middle SDI	3	Both	27	Age-standardized	683	Periodontal diseases	3	Rate	1990	2021	1.92351	22.0683	-11.9342
606	5	Prevalence	44678	North Yorkshire	3	Both	27	Age-standardized	683	Periodontal diseases	3	Rate	1990	2021	-16.0788	33.6178	-46.7503
607	5	Prevalence	44660	Lancashire	3	Both	27	Age-standardized	683	Periodontal diseases	3	Rate	1990	2021	-16.6915	33.7072	-46.9578
608	5	Prevalence	44669	Wigan	3	Both	27	Age-standardized	683	Periodontal diseases	3	Rate	1990	2021	-17.3153	37.1808	-49.6461
609	5	Prevalence	44643	Darlington	3	Both	27	Age-standardized	683	Periodontal diseases	3	Rate	1990	2021	-15.3537	34.209	-47.3376
610	5	Prevalence	44721	Cambridgeshire	3	Both	27	Age-standardized	683	Periodontal diseases	3	Rate	1990	2021	-15.3504	35.0812	-46.4857
611	5	Prevalence	44719	Hertfordshire	3	Both	27	Age-standardized	683	Periodontal diseases	3	Rate	1990	2021	-17.1324	35.4088	-46.6258
612	5	Prevalence	44654	Hartlepool	3	Both	27	Age-standardized	683	Periodontal diseases	3	Rate	1990	2021	-15.7894	38.8091	-48.101
613	5	Prevalence	44576	World Bank Upper Middle Income	3	Both	27	Age-standardized	683	Periodontal diseases	3	Rate	1990	2021	2.09488	25.9823	-13.9687
614	5	Prevalence	44680	York	3	Both	27	Age-standardized	683	Periodontal diseases	3	Rate	1990	2021	-17.6197	31.4718	-48.0425
615	5	Prevalence	44732	Bexley	3	Both	27	Age-standardized	683	Periodontal diseases	3	Rate	1990	2021	-16.3482	34.2228	-47.3104
616	5	Prevalence	44637	Low SDI	3	Both	27	Age-standardized	683	Periodontal diseases	3	Rate	1990	2021	-21.8536	-7.46844	-32.2736
617	5	Prevalence	44726	Luton	3	Both	27	Age-standardized	683	Periodontal diseases	3	Rate	1990	2021	-17.0719	32.3023	-48.0463
618	5	Prevalence	44717	Central Bedfordshire	3	Both	27	Age-standardized	683	Periodontal diseases	3	Rate	1990	2021	-17.0749	32.8925	-47.8692
619	5	Prevalence	44663	Wirral	3	Both	27	Age-standardized	683	Periodontal diseases	3	Rate	1990	2021	-16.8513	34.712	-48.0017
620	5	Prevalence	44728	Kensington and Chelsea	3	Both	27	Age-standardized	683	Periodontal diseases	3	Rate	1990	2021	-13.3505	35.1893	-43.9259
621	5	Prevalence	44674	Blackburn with Darwen	3	Both	27	Age-standardized	683	Periodontal diseases	3	Rate	1990	2021	-17.5265	33.9686	-47.3937
622	5	Prevalence	44688	Wakefield	3	Both	27	Age-standardized	683	Periodontal diseases	3	Rate	1990	2021	-14.8866	40.19	-47.0863
623	5	Prevalence	44702	Warwickshire	3	Both	27	Age-standardized	683	Periodontal diseases	3	Rate	1990	2021	-16.58	35.5829	-48.0148
624	5	Prevalence	44672	Tameside	3	Both	27	Age-standardized	683	Periodontal diseases	3	Rate	1990	2021	-18.3619	29.9573	-48.9432
625	5	Prevalence	44676	Blackpool	3	Both	27	Age-standardized	683	Periodontal diseases	3	Rate	1990	2021	-18.2006	33.5672	-48.5572
626	5	Prevalence	44684	Bradford	3	Both	27	Age-standardized	683	Periodontal diseases	3	Rate	1990	2021	-18.7732	32.7967	-49.2335
627	5	Prevalence	44665	St Helens	3	Both	27	Age-standardized	683	Periodontal diseases	3	Rate	1990	2021	-14.0627	39.0705	-46.0028
628	5	Prevalence	44737	Havering	3	Both	27	Age-standardized	683	Periodontal diseases	3	Rate	1990	2021	-16.7323	31.8135	-46.7197
629	5	Prevalence	44650	Gateshead	3	Both	27	Age-standardized	683	Periodontal diseases	3	Rate	1990	2021	-14.8641	38.9861	-46.742
630	5	Prevalence	44700	Nottingham	3	Both	27	Age-standardized	683	Periodontal diseases	3	Rate	1990	2021	-18.5268	33.1411	-48.5404
631	5	Prevalence	44743	Hammersmith and Fulham	3	Both	27	Age-standardized	683	Periodontal diseases	3	Rate	1990	2021	-15.8266	32.5651	-45.8141
632	5	Prevalence	44730	Westminster	3	Both	27	Age-standardized	683	Periodontal diseases	3	Rate	1990	2021	-15.0268	28.0943	-43.674
633	5	Prevalence	44741	Enfield	3	Both	27	Age-standardized	683	Periodontal diseases	3	Rate	1990	2021	-18.1144	32.5356	-47.5635
634	5	Prevalence	44752	Southwark	3	Both	27	Age-standardized	683	Periodontal diseases	3	Rate	1990	2021	-15.5122	31.1819	-45.6002
635	5	Prevalence	44683	North Lincolnshire	3	Both	27	Age-standardized	683	Periodontal diseases	3	Rate	1990	2021	-20.7487	27.9878	-50.272
636	5	Prevalence	44735	Brent	3	Both	27	Age-standardized	683	Periodontal diseases	3	Rate	1990	2021	-18.2891	29.7242	-48.7326
637	5	Prevalence	44711	Stoke-on-Trent	3	Both	27	Age-standardized	683	Periodontal diseases	3	Rate	1990	2021	-17.6869	33.0437	-48.073
638	5	Prevalence	44713	Wolverhampton	3	Both	27	Age-standardized	683	Periodontal diseases	3	Rate	1990	2021	-18.9801	27.4833	-48.1052
639	5	Prevalence	44687	Sheffield	3	Both	27	Age-standardized	683	Periodontal diseases	3	Rate	1990	2021	-16.3774	35.4414	-47.3002
640	5	Prevalence	44739	Sutton	3	Both	27	Age-standardized	683	Periodontal diseases	3	Rate	1990	2021	-15.9241	35.8269	-47.2742
641	5	Prevalence	44724	Southend-on-Sea	3	Both	27	Age-standardized	683	Periodontal diseases	3	Rate	1990	2021	-17.9499	30.3262	-48.2466
642	5	Prevalence	44695	Lincolnshire	3	Both	27	Age-standardized	683	Periodontal diseases	3	Rate	1990	2021	-17.0886	32.2803	-47.1777
643	5	Prevalence	44722	Thurrock	3	Both	27	Age-standardized	683	Periodontal diseases	3	Rate	1990	2021	-19.9341	25.973	-49.6957
644	5	Prevalence	44661	Cumbria	3	Both	27	Age-standardized	683	Periodontal diseases	3	Rate	1990	2021	-13.0599	40.2022	-46.0057
645	5	Prevalence	44754	Barking and Dagenham	3	Both	27	Age-standardized	683	Periodontal diseases	3	Rate	1990	2021	-18.4866	31.6245	-49.1494
646	5	Prevalence	44670	Halton	3	Both	27	Age-standardized	683	Periodontal diseases	3	Rate	1990	2021	-13.9287	40.1243	-45.6937
647	5	Prevalence	44698	Derbyshire	3	Both	27	Age-standardized	683	Periodontal diseases	3	Rate	1990	2021	-15.7498	35.9925	-47.4173
648	5	Prevalence	44720	Essex	3	Both	27	Age-standardized	683	Periodontal diseases	3	Rate	1990	2021	-15.567	33.0392	-46.1625
649	5	Prevalence	44750	Lewisham	3	Both	27	Age-standardized	683	Periodontal diseases	3	Rate	1990	2021	-15.3856	39.2061	-46.4252
650	5	Prevalence	44733	Redbridge	3	Both	27	Age-standardized	683	Periodontal diseases	3	Rate	1990	2021	-18.5949	32.3979	-48.4453
651	5	Prevalence	44681	North East Lincolnshire	3	Both	27	Age-standardized	683	Periodontal diseases	3	Rate	1990	2021	-15.4951	35.1019	-46.8649
652	5	Prevalence	44729	Barnet	3	Both	27	Age-standardized	683	Periodontal diseases	3	Rate	1990	2021	-16.1312	34.0362	-46.5198
653	5	Prevalence	44748	Camden	3	Both	27	Age-standardized	683	Periodontal diseases	3	Rate	1990	2021	-14.8719	31.2645	-44.5552
654	5	Prevalence	44704	Solihull	3	Both	27	Age-standardized	683	Periodontal diseases	3	Rate	1990	2021	-16.6683	35.2092	-47.4492
655	5	Prevalence	44746	Wandsworth	3	Both	27	Age-standardized	683	Periodontal diseases	3	Rate	1990	2021	-17.3146	29.1507	-47.7306
656	5	Prevalence	44708	Dudley	3	Both	27	Age-standardized	683	Periodontal diseases	3	Rate	1990	2021	-19.2957	27.5897	-49.0733
657	5	Prevalence	44727	Richmond upon Thames	3	Both	27	Age-standardized	683	Periodontal diseases	3	Rate	1990	2021	-15.4569	33.2751	-46.3013
658	5	Prevalence	44787	Swindon	3	Both	27	Age-standardized	683	Periodontal diseases	3	Rate	1990	2021	-3.47846	0.661381	-7.03122
659	5	Prevalence	44785	Gloucestershire	3	Both	27	Age-standardized	683	Periodontal diseases	3	Rate	1990	2021	-15.2221	34.8288	-46.727
660	5	Prevalence	44703	Herefordshire, County of	3	Both	27	Age-standardized	683	Periodontal diseases	3	Rate	1990	2021	-16.6241	33.0819	-48.0844
661	5	Prevalence	44763	West Berkshire	3	Both	27	Age-standardized	683	Periodontal diseases	3	Rate	1990	2021	2.0823	6.75711	-2.59268
662	5	Prevalence	44718	Suffolk	3	Both	27	Age-standardized	683	Periodontal diseases	3	Rate	1990	2021	-17.6552	28.4446	-47.7312
663	5	Prevalence	44774	Isle of Wight	3	Both	27	Age-standardized	683	Periodontal diseases	3	Rate	1990	2021	3.80027	8.91745	-0.615908
664	5	Prevalence	44706	Worcestershire	3	Both	27	Age-standardized	683	Periodontal diseases	3	Rate	1990	2021	-16.679	36.1535	-47.811
665	5	Prevalence	44757	Islington	3	Both	27	Age-standardized	683	Periodontal diseases	3	Rate	1990	2021	2.8889	7.69551	-2.33979
666	5	Prevalence	44693	Northamptonshire	3	Both	27	Age-standardized	683	Periodontal diseases	3	Rate	1990	2021	-16.6375	33.5349	-47.7008
667	5	Prevalence	44853	Afar	3	Both	27	Age-standardized	683	Periodontal diseases	3	Rate	1990	2021	3.79215	8.96594	-0.245844
668	5	Prevalence	44738	Kingston upon Thames	3	Both	27	Age-standardized	683	Periodontal diseases	3	Rate	1990	2021	-16.9835	34.8465	-46.9841
669	5	Prevalence	44753	Newham	3	Both	27	Age-standardized	683	Periodontal diseases	3	Rate	1990	2021	-17.7236	30.8249	-48.2095
670	5	Prevalence	44742	Croydon	3	Both	27	Age-standardized	683	Periodontal diseases	3	Rate	1990	2021	-18.9932	28.5547	-48.5948
671	5	Prevalence	44731	Bromley	3	Both	27	Age-standardized	683	Periodontal diseases	3	Rate	1990	2021	-18.7056	29.3208	-48.4469
672	5	Prevalence	44736	Hillingdon	3	Both	27	Age-standardized	683	Periodontal diseases	3	Rate	1990	2021	-18.5864	27.5899	-48.4283
673	5	Prevalence	44714	Birmingham	3	Both	27	Age-standardized	683	Periodontal diseases	3	Rate	1990	2021	-17.9996	32.499	-48.4925
674	5	Prevalence	44744	Ealing	3	Both	27	Age-standardized	683	Periodontal diseases	3	Rate	1990	2021	-18.7176	31.4894	-48.2776
675	5	Prevalence	44776	Southampton	3	Both	27	Age-standardized	683	Periodontal diseases	3	Rate	1990	2021	-1.46013	3.77997	-6.18357
676	5	Prevalence	44761	Surrey	3	Both	27	Age-standardized	683	Periodontal diseases	3	Rate	1990	2021	1.93952	6.5315	-2.41515
677	5	Prevalence	44759	Wokingham	3	Both	27	Age-standardized	683	Periodontal diseases	3	Rate	1990	2021	4.90734	9.74727	0.767578
678	5	Prevalence	44772	East Sussex	3	Both	27	Age-standardized	683	Periodontal diseases	3	Rate	1990	2021	1.33811	5.47255	-3.30467
679	5	Prevalence	44779	Dorset	3	Both	27	Age-standardized	683	Periodontal diseases	3	Rate	1990	2021	-16.5343	34.3719	-47.0685
680	5	Prevalence	44740	Harrow	3	Both	27	Age-standardized	683	Periodontal diseases	3	Rate	1990	2021	-18.1446	31.6614	-48.2035
681	5	Prevalence	44715	Sandwell	3	Both	27	Age-standardized	683	Periodontal diseases	3	Rate	1990	2021	-19.2376	31.0425	-48.9629
682	5	Prevalence	44696	Rutland	3	Both	27	Age-standardized	683	Periodontal diseases	3	Rate	1990	2021	-17.6771	35.3741	-48.6379
683	5	Prevalence	44725	Peterborough	3	Both	27	Age-standardized	683	Periodontal diseases	3	Rate	1990	2021	-16.6904	32.8864	-47.1295
684	5	Prevalence	44862	Dire Dawa	3	Both	27	Age-standardized	683	Periodontal diseases	3	Rate	1990	2021	1.21828	4.91511	-2.3964
685	5	Prevalence	44865	Ardebil	3	Both	27	Age-standardized	683	Periodontal diseases	3	Rate	1990	2021	-1.84891	43.7841	-31.2086
686	5	Prevalence	44751	Hounslow	3	Both	27	Age-standardized	683	Periodontal diseases	3	Rate	1990	2021	-17.3235	31.5647	-47.6814
687	5	Prevalence	44734	Merton	3	Both	27	Age-standardized	683	Periodontal diseases	3	Rate	1990	2021	-15.2482	37.2652	-45.4171
688	5	Prevalence	44852	Tigray	3	Both	27	Age-standardized	683	Periodontal diseases	3	Rate	1990	2021	3.52993	8.43928	-1.32607
689	5	Prevalence	44790	Bournemouth	3	Both	27	Age-standardized	683	Periodontal diseases	3	Rate	1990	2021	2.61352	7.74826	-2.1417
690	5	Prevalence	44858	Southern Nations, Nationalities, and Peoples	3	Both	27	Age-standardized	683	Periodontal diseases	3	Rate	1990	2021	3.63831	8.97746	-0.200003
691	5	Prevalence	44755	Haringey	3	Both	27	Age-standardized	683	Periodontal diseases	3	Rate	1990	2021	-0.0336928	5.87029	-4.72687
692	5	Prevalence	44856	Somali	3	Both	27	Age-standardized	683	Periodontal diseases	3	Rate	1990	2021	3.93072	8.31687	-0.659548
693	5	Prevalence	44749	Lambeth	3	Both	27	Age-standardized	683	Periodontal diseases	3	Rate	1990	2021	-14.0134	38.3667	-45.4043
694	5	Prevalence	44792	Plymouth	3	Both	27	Age-standardized	683	Periodontal diseases	3	Rate	1990	2021	-16.7261	33.1821	-48.0803
695	5	Prevalence	44709	Coventry	3	Both	27	Age-standardized	683	Periodontal diseases	3	Rate	1990	2021	-18.2154	30.1588	-48.4514
696	5	Prevalence	44747	Waltham Forest	3	Both	27	Age-standardized	683	Periodontal diseases	3	Rate	1990	2021	-16.8584	38.5253	-46.6562
697	5	Prevalence	44775	Milton Keynes	3	Both	27	Age-standardized	683	Periodontal diseases	3	Rate	1990	2021	4.98167	11.2515	0.411387
698	5	Prevalence	44868	Bushehr	3	Both	27	Age-standardized	683	Periodontal diseases	3	Rate	1990	2021	-2.88694	42.6892	-31.1919
699	5	Prevalence	44689	Rotherham	3	Both	27	Age-standardized	683	Periodontal diseases	3	Rate	1990	2021	-15.3114	36.5398	-46.6962
700	5	Prevalence	44707	Staffordshire	3	Both	27	Age-standardized	683	Periodontal diseases	3	Rate	1990	2021	-18.0805	31.0994	-49.3305
701	5	Prevalence	44764	Hampshire	3	Both	27	Age-standardized	683	Periodontal diseases	3	Rate	1990	2021	3.57009	8.75213	-1.64656
702	5	Prevalence	44788	Torbay	3	Both	27	Age-standardized	683	Periodontal diseases	3	Rate	1990	2021	0.315736	5.11668	-4.8078
703	5	Prevalence	44758	Tower Hamlets	3	Both	27	Age-standardized	683	Periodontal diseases	3	Rate	1990	2021	4.29284	9.0115	-0.724759
704	5	Prevalence	44854	Amhara	3	Both	27	Age-standardized	683	Periodontal diseases	3	Rate	1990	2021	3.93085	7.97859	-0.520018
705	5	Prevalence	44786	Somerset	3	Both	27	Age-standardized	683	Periodontal diseases	3	Rate	1990	2021	1.67702	6.63985	-3.08318
706	5	Prevalence	44860	Gambella	3	Both	27	Age-standardized	683	Periodontal diseases	3	Rate	1990	2021	4.53009	9.47499	0.5755
707	5	Prevalence	44768	Reading	3	Both	27	Age-standardized	683	Periodontal diseases	3	Rate	1990	2021	3.17151	7.52518	-1.71582
708	5	Prevalence	44885	Lorestan	3	Both	27	Age-standardized	683	Periodontal diseases	3	Rate	1990	2021	5.61323	10.621	1.48623
709	5	Prevalence	44765	Bracknell Forest	3	Both	27	Age-standardized	683	Periodontal diseases	3	Rate	1990	2021	4.44993	8.87482	0.622414
710	5	Prevalence	44780	Wiltshire	3	Both	27	Age-standardized	683	Periodontal diseases	3	Rate	1990	2021	-0.807257	3.22474	-5.03695
711	5	Prevalence	44773	Portsmouth	3	Both	27	Age-standardized	683	Periodontal diseases	3	Rate	1990	2021	1.63629	6.62605	-3.33862
712	5	Prevalence	44872	Golestan	3	Both	27	Age-standardized	683	Periodontal diseases	3	Rate	1990	2021	-0.709322	3.62788	-5.90443
713	5	Prevalence	44760	Buckinghamshire	3	Both	27	Age-standardized	683	Periodontal diseases	3	Rate	1990	2021	-0.527248	4.2532	-4.49835
714	5	Prevalence	44762	Windsor and Maidenhead	3	Both	27	Age-standardized	683	Periodontal diseases	3	Rate	1990	2021	3.05519	8.55449	-1.66835
715	5	Prevalence	44745	Greenwich	3	Both	27	Age-standardized	683	Periodontal diseases	3	Rate	1990	2021	-17.4204	32.0438	-49.3347
716	5	Prevalence	44777	Slough	3	Both	27	Age-standardized	683	Periodontal diseases	3	Rate	1990	2021	-6.34109	19.3739	-22.1107
717	5	Prevalence	44887	Mazandaran	3	Both	27	Age-standardized	683	Periodontal diseases	3	Rate	1990	2021	-1.34761	2.98723	-5.23436
718	5	Prevalence	44870	Fars	3	Both	27	Age-standardized	683	Periodontal diseases	3	Rate	1990	2021	-0.802064	44.3411	-29.2491
719	5	Prevalence	44892	Tehran	3	Both	27	Age-standardized	683	Periodontal diseases	3	Rate	1990	2021	-0.538678	2.90002	-3.55288
720	5	Prevalence	44894	Zanjan	3	Both	27	Age-standardized	683	Periodontal diseases	3	Rate	1990	2021	-8.30906	31.8283	-35.3728
721	5	Prevalence	44866	East Azarbayejan	3	Both	27	Age-standardized	683	Periodontal diseases	3	Rate	1990	2021	0.0660673	3.77308	-5.0365
722	5	Prevalence	44864	Alborz	3	Both	27	Age-standardized	683	Periodontal diseases	3	Rate	1990	2021	-0.309521	3.24961	-3.87869
723	5	Prevalence	44783	Poole	3	Both	27	Age-standardized	683	Periodontal diseases	3	Rate	1990	2021	1.06092	6.33701	-3.70309
724	5	Prevalence	44691	Kingston upon Hull, City of	3	Both	27	Age-standardized	683	Periodontal diseases	3	Rate	1990	2021	-15.1299	38.2086	-46.9178
725	5	Prevalence	44791	Cornwall	3	Both	27	Age-standardized	683	Periodontal diseases	3	Rate	1990	2021	2.13077	7.35558	-2.20151
726	5	Prevalence	44874	Hormozgan	3	Both	27	Age-standardized	683	Periodontal diseases	3	Rate	1990	2021	-2.75332	38.8612	-31.216
727	5	Prevalence	44883	Kohgiluyeh and Boyer-Ahmad	3	Both	27	Age-standardized	683	Periodontal diseases	3	Rate	1990	2021	-0.357296	43.0644	-29.49
728	5	Prevalence	44876	Isfahan	3	Both	27	Age-standardized	683	Periodontal diseases	3	Rate	1990	2021	1.67856	6.28623	-2.98882
729	5	Prevalence	44857	Benishangul-Gumuz	3	Both	27	Age-standardized	683	Periodontal diseases	3	Rate	1990	2021	4.70724	9.65535	0.248249
730	5	Prevalence	44685	Kirklees	3	Both	27	Age-standardized	683	Periodontal diseases	3	Rate	1990	2021	-17.5468	31.6346	-48.0382
731	5	Prevalence	44756	Hackney	3	Both	27	Age-standardized	683	Periodontal diseases	3	Rate	1990	2021	6.80037	11.8856	1.77307
732	5	Prevalence	44859	Harari	3	Both	27	Age-standardized	683	Periodontal diseases	3	Rate	1990	2021	2.14027	5.7794	-0.930284
733	5	Prevalence	44890	Semnan	3	Both	27	Age-standardized	683	Periodontal diseases	3	Rate	1990	2021	2.66892	7.29033	-1.45757
734	5	Prevalence	44694	Leicestershire	3	Both	27	Age-standardized	683	Periodontal diseases	3	Rate	1990	2021	-15.5662	36.6415	-47.2661
735	5	Prevalence	44705	Shropshire	3	Both	27	Age-standardized	683	Periodontal diseases	3	Rate	1990	2021	-17.1268	34.2779	-48.1771
736	5	Prevalence	44879	North Khorasan	3	Both	27	Age-standardized	683	Periodontal diseases	3	Rate	1990	2021	0.113123	46.4484	-30.8821
737	5	Prevalence	44881	South Khorasan	3	Both	27	Age-standardized	683	Periodontal diseases	3	Rate	1990	2021	7.42173	13.7002	2.64062
738	5	Prevalence	44770	Brighton and Hove	3	Both	27	Age-standardized	683	Periodontal diseases	3	Rate	1990	2021	-14.667	39.3306	-46.4808
739	5	Prevalence	44869	Chahar Mahaal and Bakhtiari	3	Both	27	Age-standardized	683	Periodontal diseases	3	Rate	1990	2021	7.34037	13.4618	2.22509
740	5	Prevalence	44781	North Somerset	3	Both	27	Age-standardized	683	Periodontal diseases	3	Rate	1990	2021	-13.4682	36.9756	-44.8289
741	5	Prevalence	44769	Kent	3	Both	27	Age-standardized	683	Periodontal diseases	3	Rate	1990	2021	1.10209	5.77878	-3.23036
742	5	Prevalence	44789	Bristol, City of	3	Both	27	Age-standardized	683	Periodontal diseases	3	Rate	1990	2021	1.66706	5.68497	-3.18336
743	5	Prevalence	44861	Addis Ababa	3	Both	27	Age-standardized	683	Periodontal diseases	3	Rate	1990	2021	-29.7784	-7.33422	-48.2663
744	5	Prevalence	44886	Markazi	3	Both	27	Age-standardized	683	Periodontal diseases	3	Rate	1990	2021	4.6645	9.55215	-0.435861
745	5	Prevalence	44855	Oromia	3	Both	27	Age-standardized	683	Periodontal diseases	3	Rate	1990	2021	4.44503	9.00611	0.443241
746	5	Prevalence	44873	Hamadan	3	Both	27	Age-standardized	683	Periodontal diseases	3	Rate	1990	2021	4.1504	9.19575	-0.579282
747	5	Prevalence	53617	Gilgit-Baltistan	3	Both	27	Age-standardized	683	Periodontal diseases	3	Rate	1990	2021	5.73646	12.5437	1.24421
748	5	Prevalence	44871	Gilan	3	Both	27	Age-standardized	683	Periodontal diseases	3	Rate	1990	2021	3.45631	8.7612	-0.871494
749	5	Prevalence	44888	Qazvin	3	Both	27	Age-standardized	683	Periodontal diseases	3	Rate	1990	2021	1.01395	47.4475	-28.6459
750	5	Prevalence	53619	Khyber Pakhtunkhwa	3	Both	27	Age-standardized	683	Periodontal diseases	3	Rate	1990	2021	3.36208	29.1794	-19.7591
751	5	Prevalence	44778	South Gloucestershire	3	Both	27	Age-standardized	683	Periodontal diseases	3	Rate	1990	2021	3.89035	8.57131	-0.942188
752	5	Prevalence	44867	West Azarbayejan	3	Both	27	Age-standardized	683	Periodontal diseases	3	Rate	1990	2021	1.9053	6.26542	-2.60002
753	5	Prevalence	44716	Bedford	3	Both	27	Age-standardized	683	Periodontal diseases	3	Rate	1990	2021	-16.1187	33.8535	-46.6992
754	5	Prevalence	44884	Kurdistan	3	Both	27	Age-standardized	683	Periodontal diseases	3	Rate	1990	2021	-0.415978	43.5664	-30.4223
755	5	Prevalence	44893	Yazd	3	Both	27	Age-standardized	683	Periodontal diseases	3	Rate	1990	2021	-2.30085	41.6572	-29.9368
756	5	Prevalence	44877	Kerman	3	Both	27	Age-standardized	683	Periodontal diseases	3	Rate	1990	2021	-6.57325	37.7792	-34.8326
757	5	Prevalence	53432	Tr酶ndelag	3	Both	27	Age-standardized	683	Periodontal diseases	3	Rate	1990	2021	-6.94518	22.8233	-29.2722
758	5	Prevalence	53615	Azad Jammu & Kashmir	3	Both	27	Age-standardized	683	Periodontal diseases	3	Rate	1990	2021	2.88046	28.1688	-18.607
759	5	Prevalence	44875	Ilam	3	Both	27	Age-standardized	683	Periodontal diseases	3	Rate	1990	2021	-1.41535	44.2684	-30.9222
760	5	Prevalence	44891	Sistan and Baluchistan	3	Both	27	Age-standardized	683	Periodontal diseases	3	Rate	1990	2021	1.73372	5.37513	-1.78599
761	5	Prevalence	44882	Khuzestan	3	Both	27	Age-standardized	683	Periodontal diseases	3	Rate	1990	2021	3.02416	8.42856	-1.08803
762	5	Prevalence	44766	West Sussex	3	Both	27	Age-standardized	683	Periodontal diseases	3	Rate	1990	2021	0.540678	6.47848	-4.56031
763	5	Prevalence	60135	Innlandet	3	Both	27	Age-standardized	683	Periodontal diseases	3	Rate	1990	2021	-7.13407	22.8901	-29.2027
764	5	Prevalence	44880	Khorasan-e-Razavi	3	Both	27	Age-standardized	683	Periodontal diseases	3	Rate	1990	2021	6.29101	11.6331	1.95233
765	5	Prevalence	44771	Medway	3	Both	27	Age-standardized	683	Periodontal diseases	3	Rate	1990	2021	1.37566	7.0007	-3.5119
766	5	Prevalence	44782	Devon	3	Both	27	Age-standardized	683	Periodontal diseases	3	Rate	1990	2021	-14.5078	36.8313	-47.1056
767	5	Prevalence	94366	Sahel Region	3	Both	27	Age-standardized	683	Periodontal diseases	3	Rate	1990	2021	-36.5322	-26.7407	-43.5629
768	5	Prevalence	44784	Bath and North East Somerset	3	Both	27	Age-standardized	683	Periodontal diseases	3	Rate	1990	2021	4.36046	9.10765	0.286497
769	5	Prevalence	60133	Agder	3	Both	27	Age-standardized	683	Periodontal diseases	3	Rate	1990	2021	-7.60431	21.6096	-29.8399
770	5	Prevalence	53618	Islamabad Capital Territory	3	Both	27	Age-standardized	683	Periodontal diseases	3	Rate	1990	2021	4.35379	8.23172	0.226584
771	5	Prevalence	44889	Qom	3	Both	27	Age-standardized	683	Periodontal diseases	3	Rate	1990	2021	3.42398	7.83384	-0.955165
772	5	Prevalence	53620	Punjab	3	Both	27	Age-standardized	683	Periodontal diseases	3	Rate	1990	2021	2.04055	29.6981	-21.1687
773	5	Prevalence	94215	Organization of Islamic Cooperation	3	Both	27	Age-standardized	683	Periodontal diseases	3	Rate	1990	2021	-5.31353	16.5778	-21.8605
774	5	Prevalence	44692	Barnsley	3	Both	27	Age-standardized	683	Periodontal diseases	3	Rate	1990	2021	-16.0875	37.8573	-47.1022
775	5	Prevalence	94217	Gulf Cooperation Council	3	Both	27	Age-standardized	683	Periodontal diseases	3	Rate	1990	2021	17.8434	65.6369	-15.9688
776	5	Prevalence	53616	Balochistan	3	Both	27	Age-standardized	683	Periodontal diseases	3	Rate	1990	2021	1.49972	29.6567	-21.4981
777	5	Prevalence	95470	Minimal Health System	3	Both	27	Age-standardized	683	Periodontal diseases	3	Rate	1990	2021	-31.1535	-13.1384	-44.3002
778	5	Prevalence	95080	Brazil Central-West	3	Both	27	Age-standardized	683	Periodontal diseases	3	Rate	1990	2021	20.6617	28.7483	12.9302
779	5	Prevalence	95471	Health System Grouping Levels	3	Both	27	Age-standardized	683	Periodontal diseases	3	Rate	1990	2021	1.75896	26.6339	-15.5464
780	5	Prevalence	95079	Brazil Northeast	3	Both	27	Age-standardized	683	Periodontal diseases	3	Rate	1990	2021	19.5686	27.015	11.4148
781	5	Prevalence	60136	Viken	3	Both	27	Age-standardized	683	Periodontal diseases	3	Rate	1990	2021	-8.16593	19.4292	-29.6651
782	5	Prevalence	95078	Brazil North	3	Both	27	Age-standardized	683	Periodontal diseases	3	Rate	1990	2021	13.8436	29.6741	3.89539
783	5	Prevalence	44878	Kermanshah	3	Both	27	Age-standardized	683	Periodontal diseases	3	Rate	1990	2021	5.09754	10.918	0.655215
784	5	Prevalence	60132	Vestland	3	Both	27	Age-standardized	683	Periodontal diseases	3	Rate	1990	2021	-7.303	21.1573	-28.5548
785	5	Prevalence	95469	Limited Health System	3	Both	27	Age-standardized	683	Periodontal diseases	3	Rate	1990	2021	-3.30026	19.3282	-20.1568
786	5	Prevalence	60134	Vestfold og Telemark	3	Both	27	Age-standardized	683	Periodontal diseases	3	Rate	1990	2021	-7.71612	21.0537	-29.7805
787	5	Prevalence	95082	Brazil Southeast	3	Both	27	Age-standardized	683	Periodontal diseases	3	Rate	1990	2021	15.5219	28.2475	4.15343
788	5	Prevalence	95468	Basic Health System	3	Both	27	Age-standardized	683	Periodontal diseases	3	Rate	1990	2021	-0.498473	19.8181	-14.3337
789	5	Prevalence	53621	Sindh	3	Both	27	Age-standardized	683	Periodontal diseases	3	Rate	1990	2021	3.14178	22.5199	-14.669
790	5	Prevalence	95467	Advanced Health System	3	Both	27	Age-standardized	683	Periodontal diseases	3	Rate	1990	2021	-1.47169	33.9858	-26.0929
791	5	Prevalence	94216	Association of Southeast Asian Nations	3	Both	27	Age-standardized	683	Periodontal diseases	3	Rate	1990	2021	-5.30972	11.557	-17.2863
792	5	Prevalence	94365	Central Africa	3	Both	27	Age-standardized	683	Periodontal diseases	3	Rate	1990	2021	-33.5699	-15.6397	-46.6269
793	5	Prevalence	60137	Troms og Finnmark	3	Both	27	Age-standardized	683	Periodontal diseases	3	Rate	1990	2021	-3.48337	15.3511	-21.9737
794	5	Prevalence	44767	Oxfordshire	3	Both	27	Age-standardized	683	Periodontal diseases	3	Rate	1990	2021	2.77273	7.46343	-2.63885
795	5	Prevalence	95081	Brazil South	3	Both	27	Age-standardized	683	Periodontal diseases	3	Rate	1990	2021	7.21076	35.0027	-11.6507
