# Supplementary material for: Global, Regional, and National Levels and Trends in Burden of Dental Caries and Periodontal Disease from 1990 to 2035：Result From the Global Burden of Disease Study 2021
Source: Research Square preprint supplement (doi:10.21203/rs.3.rs-5609270/v1), 2025-04-02
Supplement: Supplementary file 6 [file 1aac8c28d7befc3620230b81.xlsx]

## Sheet: Sheet1
Exported data
	val	sd	Time	group	low_50	up_50	low_60	up_60	low_70	up_70	low_80	up_80	low_95	up_95
1	30812.7	0.895213	1990	ASR	30812.1	30813.3	30812	30813.5	30811.8	30813.6	30811.6	30813.9	30811	30814.5
2	30792	0.886246	1991	ASR	30791.4	30792.6	30791.3	30792.8	30791.1	30793	30790.9	30793.2	30790.3	30793.8
3	30770.3	0.877369	1992	ASR	30769.7	30770.9	30769.6	30771	30769.4	30771.2	30769.2	30771.4	30768.6	30772
4	30748.8	0.868777	1993	ASR	30748.2	30749.3	30748	30749.5	30747.9	30749.7	30747.6	30749.9	30747.1	30750.5
5	30721.9	0.860367	1994	ASR	30721.3	30722.4	30721.1	30722.6	30721	30722.8	30720.8	30723	30720.2	30723.6
6	30693.2	0.852365	1995	ASR	30692.6	30693.8	30692.5	30693.9	30692.3	30694.1	30692.1	30694.3	30691.5	30694.9
7	30665.4	0.844337	1996	ASR	30664.8	30666	30664.7	30666.1	30664.5	30666.3	30664.3	30666.5	30663.7	30667
8	30639.9	0.836297	1997	ASR	30639.3	30640.4	30639.2	30640.6	30639	30640.7	30638.8	30640.9	30638.2	30641.5
9	30622.7	0.828603	1998	ASR	30622.2	30623.3	30622	30623.4	30621.9	30623.6	30621.7	30623.8	30621.1	30624.3
10	30617.2	0.821316	1999	ASR	30616.6	30617.7	30616.5	30617.9	30616.3	30618	30616.1	30618.2	30615.6	30618.8
11	30628.8	0.814749	2000	ASR	30628.2	30629.3	30628.1	30629.5	30627.9	30629.6	30627.7	30629.8	30627.2	30630.4
12	30751.9	0.809807	2001	ASR	30751.3	30752.4	30751.2	30752.6	30751.1	30752.7	30750.9	30752.9	30750.3	30753.5
13	31017.4	0.806719	2002	ASR	31016.9	31018	31016.8	31018.1	31016.6	31018.3	31016.4	31018.5	31015.9	31019
14	31332.2	0.804438	2003	ASR	31331.6	31332.7	31331.5	31332.9	31331.3	31333	31331.2	31333.2	31330.6	31333.8
15	31599.5	0.801641	2004	ASR	31599	31600.1	31598.8	31600.2	31598.7	31600.4	31598.5	31600.5	31597.9	31601.1
16	31724	0.79739	2005	ASR	31723.5	31724.6	31723.4	31724.7	31723.2	31724.9	31723	31725.1	31722.5	31725.6
17	31687.4	0.791306	2006	ASR	31686.9	31688	31686.8	31688.1	31686.6	31688.3	31686.4	31688.5	31685.9	31689
18	31566.3	0.784204	2007	ASR	31565.8	31566.8	31565.6	31566.9	31565.5	31567.1	31565.3	31567.3	31564.7	31567.8
19	31410	0.776669	2008	ASR	31409.5	31410.5	31409.3	31410.6	31409.2	31410.8	31409	31411	31408.5	31411.5
20	31266.5	0.769241	2009	ASR	31266	31267	31265.8	31267.1	31265.7	31267.3	31265.5	31267.5	31265	31268
21	31187.5	0.762812	2010	ASR	31187	31188	31186.9	31188.1	31186.7	31188.3	31186.5	31188.5	31186	31189
22	31157.2	0.756933	2011	ASR	31156.7	31157.7	31156.5	31157.8	31156.4	31158	31156.2	31158.1	31155.7	31158.7
23	31126.8	0.750848	2012	ASR	31126.3	31127.3	31126.2	31127.5	31126	31127.6	31125.9	31127.8	31125.4	31128.3
24	31094	0.744729	2013	ASR	31093.5	31094.5	31093.4	31094.7	31093.3	31094.8	31093.1	31095	31092.6	31095.5
25	31054.8	0.738638	2014	ASR	31054.3	31055.3	31054.2	31055.4	31054	31055.6	31053.9	31055.8	31053.4	31056.3
26	31006.4	0.732698	2015	ASR	31005.9	31006.9	31005.8	31007	31005.7	31007.2	31005.5	31007.4	31005	31007.9
27	30851.5	0.725904	2016	ASR	30851	30852	30850.9	30852.1	30850.8	30852.3	30850.6	30852.4	30850.1	30852.9
28	30577.1	0.718163	2017	ASR	30576.6	30577.5	30576.4	30577.7	30576.3	30577.8	30576.1	30578	30575.6	30578.5
29	30301.4	0.710561	2018	ASR	30301	30301.9	30300.8	30302	30300.7	30302.2	30300.5	30302.4	30300.1	30302.8
30	30159.1	0.704848	2019	ASR	30158.6	30159.6	30158.5	30159.7	30158.4	30159.8	30158.2	30160	30157.7	30160.5
31	30127.8	0.700613	2020	ASR	30127.3	30128.3	30127.2	30128.4	30127.1	30128.5	30126.9	30128.7	30126.4	30129.2
32	30053.5	0.696122	2021	ASR	30053	30054	30052.9	30054.1	30052.8	30054.2	30052.6	30054.4	30052.1	30054.9
33	29922.2	190.911	2022	ASR	29793.6	30050.9	29761.7	30082.8	29724.5	30120	29677.5	30167	29548.1	30296.4
34	29852.4	249.203	2023	ASR	29684.5	30020.4	29642.8	30062	29594.2	30110.6	29532.9	30171.9	29364	30340.9
35	29780.7	298.012	2024	ASR	29579.8	29981.6	29530.1	30031.3	29472	30089.4	29398.7	30162.8	29196.6	30364.8
36	29703.9	341.425	2025	ASR	29473.8	29934	29416.8	29991	29350.2	30057.6	29266.2	30141.6	29034.7	30373.1
37	29613.3	382.206	2026	ASR	29355.7	29870.9	29291.8	29934.7	29217.3	30009.3	29123.3	30103.3	28864.2	30362.4
38	29512.3	422.2	2027	ASR	29227.7	29796.8	29157.2	29867.3	29074.9	29949.7	28971	30053.5	28684.7	30339.8
39	29405.9	461.285	2028	ASR	29095	29716.8	29017.9	29793.8	28928	29883.8	28814.5	29997.2	28501.8	30310
40	29296.6	499.476	2029	ASR	28959.9	29633.2	28876.5	29716.6	28779.1	29814	28656.2	29936.9	28317.6	30275.5
41	29182.3	537.323	2030	ASR	28820.1	29544.4	28730.4	29634.2	28625.6	29738.9	28493.4	29871.1	28129.1	30235.4
42	29056.8	576.111	2031	ASR	28668.5	29445.1	28572.3	29541.3	28460	29653.7	28318.2	29795.4	27927.6	30186
43	28926.3	617.132	2032	ASR	28510.4	29342.3	28407.3	29445.3	28287	29565.7	28135.1	29717.5	27716.7	30135.9
44	28793.6	660.209	2033	ASR	28348.7	29238.6	28238.4	29348.9	28109.7	29477.6	27947.2	29640	27499.6	30087.6
45	28657.9	705.193	2034	ASR	28182.6	29133.2	28064.9	29251	27927.4	29388.5	27753.9	29562	27275.8	30040.1
46	28514.8	752.414	2035	ASR	28007.7	29022	27882.1	29147.6	27735.3	29294.3	27550.2	29479.4	27040.1	29989.6
