# Supplementary material for: Global, Regional, and National Levels and Trends in Burden of Dental Caries and Periodontal Disease from 1990 to 2035：Result From the Global Burden of Disease Study 2021
Source: Research Square preprint supplement (doi:10.21203/rs.3.rs-5609270/v1), 2025-04-02
Supplement: Supplementary file 7 [file 2129923bf504516bab57ba8b.xlsx]

## Sheet: Sheet1
Exported data
	measure_name	location_name	sex_name	age_name	cause_name	metric_name	year	val	upper	lower
1	Incidence	Southeast Asia	Both	5-9 years	Periodontal diseases	Rate	1990	0	0	0
2	Incidence	Southeast Asia	Both	5-9 years	Periodontal diseases	Rate	2021	0	0	0
3	Incidence	Southeast Asia	Both	10-14 years	Periodontal diseases	Rate	1990	0	0	0
4	Incidence	Southeast Asia	Both	10-14 years	Periodontal diseases	Rate	2021	0	0	0
5	Incidence	Southeast Asia	Both	15-19 years	Periodontal diseases	Rate	1990	221.321	434.235	93.1462
6	Incidence	Southeast Asia	Both	15-19 years	Periodontal diseases	Rate	2021	172.392	293.6	96.4181
7	Incidence	Southeast Asia	Both	25-29 years	Periodontal diseases	Rate	1990	1075.75	1779.83	538.081
8	Incidence	Southeast Asia	Both	25-29 years	Periodontal diseases	Rate	2021	877.593	1363.8	491.145
9	Incidence	Southeast Asia	Both	30-34 years	Periodontal diseases	Rate	1990	1366.96	2129.38	738.858
10	Incidence	Southeast Asia	Both	30-34 years	Periodontal diseases	Rate	2021	1159.34	1696.91	712.875
11	Incidence	Southeast Asia	Both	35-39 years	Periodontal diseases	Rate	1990	1612.91	2450.02	781.296
12	Incidence	Southeast Asia	Both	35-39 years	Periodontal diseases	Rate	2021	1397.64	1992.07	848.516
13	Incidence	Southeast Asia	Both	40-44 years	Periodontal diseases	Rate	1990	1805.79	2738.45	857.758
14	Incidence	Southeast Asia	Both	40-44 years	Periodontal diseases	Rate	2021	1577.76	2147.29	964.067
15	Incidence	Southeast Asia	Both	45-49 years	Periodontal diseases	Rate	1990	1837.18	2685.65	887.14
16	Incidence	Southeast Asia	Both	45-49 years	Periodontal diseases	Rate	2021	1701.86	2263.81	1117.44
17	Incidence	Southeast Asia	Both	50-54 years	Periodontal diseases	Rate	1990	1867.56	2606.22	1119.09
18	Incidence	Southeast Asia	Both	50-54 years	Periodontal diseases	Rate	2021	1800.75	2385.78	1261.24
19	Incidence	Southeast Asia	Both	55-59 years	Periodontal diseases	Rate	1990	1851.32	2625.73	1105.75
20	Incidence	Southeast Asia	Both	55-59 years	Periodontal diseases	Rate	2021	1840.2	2433.06	1262.48
21	Incidence	Southeast Asia	Both	60-64 years	Periodontal diseases	Rate	1990	1851.78	2614.14	1080.58
22	Incidence	Southeast Asia	Both	60-64 years	Periodontal diseases	Rate	2021	1863.57	2433.91	1287.13
23	Incidence	Southeast Asia	Both	65-69 years	Periodontal diseases	Rate	1990	1889.63	2634.88	1020.12
24	Incidence	Southeast Asia	Both	65-69 years	Periodontal diseases	Rate	2021	1899.29	2467.12	1268.49
25	Incidence	Southeast Asia	Both	70+ years	Periodontal diseases	Rate	1990	1910.33	2480.01	1288.91
26	Incidence	Southeast Asia	Both	70+ years	Periodontal diseases	Rate	2021	1928.88	2335.41	1410.43
27	Incidence	Global	Both	70+ years	Periodontal diseases	Rate	1990	1881.11	2431.7	1268.62
28	Incidence	Global	Both	70+ years	Periodontal diseases	Rate	2021	1889.01	2302.24	1310.92
29	Incidence	Global	Both	5-9 years	Periodontal diseases	Rate	1990	0	0	0
30	Incidence	Global	Both	5-9 years	Periodontal diseases	Rate	2021	0	0	0
31	Incidence	Global	Both	10-14 years	Periodontal diseases	Rate	1990	0	0	0
32	Incidence	Global	Both	10-14 years	Periodontal diseases	Rate	2021	0	0	0
33	Incidence	Global	Both	15-19 years	Periodontal diseases	Rate	1990	389.36	697.502	190.368
34	Incidence	Global	Both	15-19 years	Periodontal diseases	Rate	2021	436.155	684.602	260.898
35	Incidence	Global	Both	25-29 years	Periodontal diseases	Rate	1990	1227.57	1934.74	647.19
36	Incidence	Global	Both	25-29 years	Periodontal diseases	Rate	2021	1373.12	2015.69	833.208
37	Incidence	Global	Both	30-34 years	Periodontal diseases	Rate	1990	1509.66	2299.03	830.717
38	Incidence	Global	Both	30-34 years	Periodontal diseases	Rate	2021	1556.68	2231.4	1003.05
39	Incidence	Global	Both	35-39 years	Periodontal diseases	Rate	1990	1798.09	2678.69	890.203
40	Incidence	Global	Both	35-39 years	Periodontal diseases	Rate	2021	1732.39	2428.19	1113.58
41	Incidence	Global	Both	40-44 years	Periodontal diseases	Rate	1990	1958.02	2873.1	957.963
42	Incidence	Global	Both	40-44 years	Periodontal diseases	Rate	2021	1829.89	2464.42	1126.63
43	Incidence	Global	Both	45-49 years	Periodontal diseases	Rate	1990	1961.69	2783.07	1021.31
44	Incidence	Global	Both	45-49 years	Periodontal diseases	Rate	2021	1869.1	2427.26	1233.42
45	Incidence	Global	Both	50-54 years	Periodontal diseases	Rate	1990	1968.07	2681.14	1226.79
46	Incidence	Global	Both	50-54 years	Periodontal diseases	Rate	2021	1880.5	2472.95	1228.3
47	Incidence	Global	Both	55-59 years	Periodontal diseases	Rate	1990	1923.11	2657.42	1169.79
48	Incidence	Global	Both	55-59 years	Periodontal diseases	Rate	2021	1838.86	2433.67	1216.69
49	Incidence	Global	Both	60-64 years	Periodontal diseases	Rate	1990	1879.09	2614.36	1111.76
50	Incidence	Global	Both	60-64 years	Periodontal diseases	Rate	2021	1813.41	2424.83	1199.84
51	Incidence	Global	Both	65-69 years	Periodontal diseases	Rate	1990	1880.42	2575.53	1057.46
52	Incidence	Global	Both	65-69 years	Periodontal diseases	Rate	2021	1849.92	2455.54	1181.36
53	Incidence	Central Europe	Both	5-9 years	Periodontal diseases	Rate	1990	0	0	0
54	Incidence	Central Europe	Both	5-9 years	Periodontal diseases	Rate	2021	0	0	0
55	Incidence	Central Europe	Both	10-14 years	Periodontal diseases	Rate	1990	0	0	0
56	Incidence	Central Europe	Both	10-14 years	Periodontal diseases	Rate	2021	0	0	0
57	Incidence	Central Europe	Both	15-19 years	Periodontal diseases	Rate	1990	172.99	330.913	71.9518
58	Incidence	Central Europe	Both	15-19 years	Periodontal diseases	Rate	2021	182.648	359.329	82.3113
59	Incidence	Central Europe	Both	25-29 years	Periodontal diseases	Rate	1990	829.996	1393.55	416.604
60	Incidence	Central Europe	Both	25-29 years	Periodontal diseases	Rate	2021	1003.97	1965.64	464.541
61	Incidence	Central Europe	Both	30-34 years	Periodontal diseases	Rate	1990	1166.07	1891.64	612.442
62	Incidence	Central Europe	Both	30-34 years	Periodontal diseases	Rate	2021	1387.11	2466.03	669.584
63	Incidence	Central Europe	Both	35-39 years	Periodontal diseases	Rate	1990	1482.62	2320.98	691.416
64	Incidence	Central Europe	Both	35-39 years	Periodontal diseases	Rate	2021	1651.71	2692.42	826.976
65	Incidence	Central Europe	Both	40-44 years	Periodontal diseases	Rate	1990	1700.13	2706.08	795.149
66	Incidence	Central Europe	Both	40-44 years	Periodontal diseases	Rate	2021	1757.32	2673.87	780.124
67	Incidence	Central Europe	Both	45-49 years	Periodontal diseases	Rate	1990	1759.36	2682.3	816.466
68	Incidence	Central Europe	Both	45-49 years	Periodontal diseases	Rate	2021	1820.63	2668.43	969.98
69	Incidence	Central Europe	Both	50-54 years	Periodontal diseases	Rate	1990	1869.34	2667.14	1089.37
70	Incidence	Central Europe	Both	50-54 years	Periodontal diseases	Rate	2021	1849.47	2740.95	870.992
71	Incidence	Central Europe	Both	55-59 years	Periodontal diseases	Rate	1990	1894.52	2755.8	1085.88
72	Incidence	Central Europe	Both	55-59 years	Periodontal diseases	Rate	2021	1830.39	2673.02	938.732
73	Incidence	Central Europe	Both	60-64 years	Periodontal diseases	Rate	1990	1890.67	2649.68	1104.01
74	Incidence	Central Europe	Both	60-64 years	Periodontal diseases	Rate	2021	1844.19	2651.98	1014.79
75	Incidence	Central Europe	Both	65-69 years	Periodontal diseases	Rate	1990	1917.2	2643.04	1064.73
76	Incidence	Central Europe	Both	65-69 years	Periodontal diseases	Rate	2021	1884.29	2713.43	911.121
77	Incidence	East Asia	Both	5-9 years	Periodontal diseases	Rate	1990	0	0	0
78	Incidence	East Asia	Both	5-9 years	Periodontal diseases	Rate	2021	0	0	0
79	Incidence	East Asia	Both	10-14 years	Periodontal diseases	Rate	1990	0	0	0
80	Incidence	East Asia	Both	10-14 years	Periodontal diseases	Rate	2021	0	0	0
81	Incidence	East Asia	Both	15-19 years	Periodontal diseases	Rate	1990	109.66	222.356	38.8034
82	Incidence	East Asia	Both	15-19 years	Periodontal diseases	Rate	2021	121.265	207.141	66.3754
83	Incidence	East Asia	Both	25-29 years	Periodontal diseases	Rate	1990	712.856	1259.49	343.165
84	Incidence	East Asia	Both	25-29 years	Periodontal diseases	Rate	2021	717.288	1139.18	387.799
85	Incidence	East Asia	Both	30-34 years	Periodontal diseases	Rate	1990	1250.44	2113.58	621.614
86	Incidence	East Asia	Both	30-34 years	Periodontal diseases	Rate	2021	1185.4	1868.19	703.795
87	Incidence	East Asia	Both	35-39 years	Periodontal diseases	Rate	1990	1832.86	2834.66	894.559
88	Incidence	East Asia	Both	35-39 years	Periodontal diseases	Rate	2021	1662.68	2432.18	1011.43
89	Incidence	East Asia	Both	40-44 years	Periodontal diseases	Rate	1990	2132.37	3140.3	1042.38
90	Incidence	East Asia	Both	40-44 years	Periodontal diseases	Rate	2021	1979.65	2726.34	1199.16
91	Incidence	East Asia	Both	45-49 years	Periodontal diseases	Rate	1990	2143.25	3028.54	1104.71
92	Incidence	East Asia	Both	45-49 years	Periodontal diseases	Rate	2021	2076.68	2716.14	1364.9
93	Incidence	East Asia	Both	50-54 years	Periodontal diseases	Rate	1990	2118.9	2877.73	1313.85
94	Incidence	East Asia	Both	50-54 years	Periodontal diseases	Rate	2021	2074.91	2635.01	1453.77
95	Incidence	East Asia	Both	55-59 years	Periodontal diseases	Rate	1990	2051.61	2835.73	1225.99
96	Incidence	East Asia	Both	55-59 years	Periodontal diseases	Rate	2021	2006.98	2615.69	1446.72
97	Incidence	East Asia	Both	60-64 years	Periodontal diseases	Rate	1990	1976.2	2722.14	1193.83
98	Incidence	East Asia	Both	60-64 years	Periodontal diseases	Rate	2021	1944.95	2538.01	1343.67
99	Incidence	East Asia	Both	65-69 years	Periodontal diseases	Rate	1990	1950.6	2671.91	1105.86
100	Incidence	East Asia	Both	65-69 years	Periodontal diseases	Rate	2021	1938.24	2505.41	1291.6
101	Incidence	Central Europe	Both	70+ years	Periodontal diseases	Rate	1990	1917.81	2483.52	1282.9
102	Incidence	Central Europe	Both	70+ years	Periodontal diseases	Rate	2021	1939.05	2487.4	1171.18
103	Incidence	East Asia	Both	70+ years	Periodontal diseases	Rate	1990	1927.39	2497.87	1241.57
104	Incidence	East Asia	Both	70+ years	Periodontal diseases	Rate	2021	1932.2	2338.75	1458.96
105	Incidence	Oceania	Both	70+ years	Periodontal diseases	Rate	1990	1915.34	2552.54	1190.25
106	Incidence	Oceania	Both	70+ years	Periodontal diseases	Rate	2021	995.463	1541.49	416.561
107	Incidence	Central Asia	Both	70+ years	Periodontal diseases	Rate	1990	1956.52	2471.36	1299.77
108	Incidence	Central Asia	Both	70+ years	Periodontal diseases	Rate	2021	1957.42	2514.21	1156.41
109	Incidence	Oceania	Both	5-9 years	Periodontal diseases	Rate	1990	0	0	0
110	Incidence	Oceania	Both	5-9 years	Periodontal diseases	Rate	2021	0	0	0
111	Incidence	Oceania	Both	10-14 years	Periodontal diseases	Rate	1990	0	0	0
112	Incidence	Oceania	Both	10-14 years	Periodontal diseases	Rate	2021	0	0	0
113	Incidence	Oceania	Both	15-19 years	Periodontal diseases	Rate	1990	138.76	273.578	52.5875
114	Incidence	Oceania	Both	15-19 years	Periodontal diseases	Rate	2021	39.2115	76.51	16.8281
115	Incidence	Oceania	Both	25-29 years	Periodontal diseases	Rate	1990	713.659	1246.24	344.472
116	Incidence	Oceania	Both	25-29 years	Periodontal diseases	Rate	2021	152.239	327.832	67.9738
117	Incidence	Oceania	Both	30-34 years	Periodontal diseases	Rate	1990	1073.71	1847.56	531.806
118	Incidence	Oceania	Both	30-34 years	Periodontal diseases	Rate	2021	217.434	447.872	100.78
119	Incidence	Oceania	Both	35-39 years	Periodontal diseases	Rate	1990	1495.3	2487.71	657.083
120	Incidence	Oceania	Both	35-39 years	Periodontal diseases	Rate	2021	287.993	554.472	134.612
121	Incidence	Oceania	Both	40-44 years	Periodontal diseases	Rate	1990	1834.69	3017.4	800.975
122	Incidence	Oceania	Both	40-44 years	Periodontal diseases	Rate	2021	366.744	715.248	147.692
123	Incidence	Oceania	Both	45-49 years	Periodontal diseases	Rate	1990	1970.09	2967.52	886.185
124	Incidence	Oceania	Both	45-49 years	Periodontal diseases	Rate	2021	453.915	870.99	195.401
125	Incidence	Oceania	Both	50-54 years	Periodontal diseases	Rate	1990	2032.57	2891.48	1169.61
126	Incidence	Oceania	Both	50-54 years	Periodontal diseases	Rate	2021	526.177	1102.17	212.509
127	Incidence	Oceania	Both	55-59 years	Periodontal diseases	Rate	1990	2000.3	2920.61	1138.96
128	Incidence	Oceania	Both	55-59 years	Periodontal diseases	Rate	2021	562.354	1073.23	239.478
129	Incidence	Oceania	Both	60-64 years	Periodontal diseases	Rate	1990	1942.07	2747.99	1103.17
130	Incidence	Oceania	Both	60-64 years	Periodontal diseases	Rate	2021	621.314	1104.37	290.49
131	Incidence	Oceania	Both	65-69 years	Periodontal diseases	Rate	1990	1933.32	2734.27	998.645
132	Incidence	Oceania	Both	65-69 years	Periodontal diseases	Rate	2021	731.366	1409.69	265.648
133	Incidence	Western Europe	Both	70+ years	Periodontal diseases	Rate	1990	1717.72	2273.15	1158.92
134	Incidence	Western Europe	Both	70+ years	Periodontal diseases	Rate	2021	1747.17	2244.69	1069.87
135	Incidence	Eastern Europe	Both	70+ years	Periodontal diseases	Rate	1990	1938.71	2478.52	1280.8
136	Incidence	Eastern Europe	Both	70+ years	Periodontal diseases	Rate	2021	1946.68	2477.51	1190.23
137	Incidence	Australasia	Both	70+ years	Periodontal diseases	Rate	1990	1809.27	2474.45	1107.11
138	Incidence	Australasia	Both	70+ years	Periodontal diseases	Rate	2021	1841.61	2481.69	1000.41
139	Incidence	High-income Asia Pacific	Both	70+ years	Periodontal diseases	Rate	1990	1802.65	2480.29	1090.42
140	Incidence	High-income Asia Pacific	Both	70+ years	Periodontal diseases	Rate	2021	1936.04	2512.18	1174.87
141	Incidence	Central Asia	Both	5-9 years	Periodontal diseases	Rate	1990	0	0	0
142	Incidence	Central Asia	Both	5-9 years	Periodontal diseases	Rate	2021	0	0	0
143	Incidence	Central Asia	Both	10-14 years	Periodontal diseases	Rate	1990	0	0	0
144	Incidence	Central Asia	Both	10-14 years	Periodontal diseases	Rate	2021	0	0	0
145	Incidence	Central Asia	Both	15-19 years	Periodontal diseases	Rate	1990	150.73	294.335	60.2806
146	Incidence	Central Asia	Both	15-19 years	Periodontal diseases	Rate	2021	140.075	275.322	61.3905
147	Incidence	Central Asia	Both	25-29 years	Periodontal diseases	Rate	1990	790.88	1370.16	386.709
148	Incidence	Central Asia	Both	25-29 years	Periodontal diseases	Rate	2021	824.798	1709	364.898
149	Incidence	Central Asia	Both	30-34 years	Periodontal diseases	Rate	1990	1208.58	2044.38	616.499
150	Incidence	Central Asia	Both	30-34 years	Periodontal diseases	Rate	2021	1258.8	2397.13	590.381
151	Incidence	Central Asia	Both	35-39 years	Periodontal diseases	Rate	1990	1669.85	2651.21	771.585
152	Incidence	Central Asia	Both	35-39 years	Periodontal diseases	Rate	2021	1637.43	2898.09	790.481
153	Incidence	Central Asia	Both	40-44 years	Periodontal diseases	Rate	1990	1996.34	3078.4	941.142
154	Incidence	Central Asia	Both	40-44 years	Periodontal diseases	Rate	2021	1873.85	2902.75	819.902
155	Incidence	Central Asia	Both	45-49 years	Periodontal diseases	Rate	1990	2064.32	3024.39	974.107
156	Incidence	Central Asia	Both	45-49 years	Periodontal diseases	Rate	2021	1965.97	2881.17	1049
157	Incidence	Central Asia	Both	50-54 years	Periodontal diseases	Rate	1990	2084.92	2870.1	1229.06
158	Incidence	Central Asia	Both	50-54 years	Periodontal diseases	Rate	2021	1963.82	2921.69	925.967
159	Incidence	Central Asia	Both	55-59 years	Periodontal diseases	Rate	1990	2032.27	2851.9	1206.11
160	Incidence	Central Asia	Both	55-59 years	Periodontal diseases	Rate	2021	1890.84	2805.25	931.652
161	Incidence	Central Asia	Both	60-64 years	Periodontal diseases	Rate	1990	1976.61	2747.87	1181.23
162	Incidence	Central Asia	Both	60-64 years	Periodontal diseases	Rate	2021	1867.99	2718.1	1002.29
163	Incidence	Central Asia	Both	65-69 years	Periodontal diseases	Rate	1990	1969.03	2721.19	1077.92
164	Incidence	Central Asia	Both	65-69 years	Periodontal diseases	Rate	2021	1897.45	2729.67	896.16
165	Incidence	Western Europe	Both	5-9 years	Periodontal diseases	Rate	1990	0	0	0
166	Incidence	Western Europe	Both	5-9 years	Periodontal diseases	Rate	2021	0	0	0
167	Incidence	Western Europe	Both	10-14 years	Periodontal diseases	Rate	1990	0	0	0
168	Incidence	Western Europe	Both	10-14 years	Periodontal diseases	Rate	2021	0	0	0
169	Incidence	Western Europe	Both	15-19 years	Periodontal diseases	Rate	1990	344.895	561.64	199.151
170	Incidence	Western Europe	Both	15-19 years	Periodontal diseases	Rate	2021	215.202	417.003	102.254
171	Incidence	Western Europe	Both	25-29 years	Periodontal diseases	Rate	1990	1029.29	1597.36	574.749
172	Incidence	Western Europe	Both	25-29 years	Periodontal diseases	Rate	2021	997.804	1727.93	501.811
173	Incidence	Western Europe	Both	30-34 years	Periodontal diseases	Rate	1990	1206.55	1845.71	698.092
174	Incidence	Western Europe	Both	30-34 years	Periodontal diseases	Rate	2021	1232.02	1965.13	636.988
175	Incidence	Western Europe	Both	35-39 years	Periodontal diseases	Rate	1990	1449.64	2215.67	762.478
176	Incidence	Western Europe	Both	35-39 years	Periodontal diseases	Rate	2021	1339.29	2150.32	712.188
177	Incidence	Western Europe	Both	40-44 years	Periodontal diseases	Rate	1990	1655.82	2542.52	855.264
178	Incidence	Western Europe	Both	40-44 years	Periodontal diseases	Rate	2021	1419.47	2190.24	651.44
179	Incidence	Western Europe	Both	45-49 years	Periodontal diseases	Rate	1990	1771.88	2560.71	991.551
180	Incidence	Western Europe	Both	45-49 years	Periodontal diseases	Rate	2021	1498.58	2276.79	829.93
181	Incidence	Western Europe	Both	50-54 years	Periodontal diseases	Rate	1990	1813.84	2496.58	1175.66
182	Incidence	Western Europe	Both	50-54 years	Periodontal diseases	Rate	2021	1558.56	2393.14	756.927
183	Incidence	Western Europe	Both	55-59 years	Periodontal diseases	Rate	1990	1727.46	2487.86	1080.68
184	Incidence	Western Europe	Both	55-59 years	Periodontal diseases	Rate	2021	1535.54	2287.34	802.926
185	Incidence	Western Europe	Both	60-64 years	Periodontal diseases	Rate	1990	1664.58	2368.91	998.557
186	Incidence	Western Europe	Both	60-64 years	Periodontal diseases	Rate	2021	1544.18	2254.23	846.326
187	Incidence	Western Europe	Both	65-69 years	Periodontal diseases	Rate	1990	1670.49	2363.15	905.514
188	Incidence	Western Europe	Both	65-69 years	Periodontal diseases	Rate	2021	1615.2	2406.92	741.703
189	Incidence	Australasia	Both	5-9 years	Periodontal diseases	Rate	1990	0	0	0
190	Incidence	Australasia	Both	5-9 years	Periodontal diseases	Rate	2021	0	0	0
191	Incidence	Australasia	Both	10-14 years	Periodontal diseases	Rate	1990	0	0	0
192	Incidence	Australasia	Both	10-14 years	Periodontal diseases	Rate	2021	0	0	0
193	Incidence	Australasia	Both	15-19 years	Periodontal diseases	Rate	1990	182.883	359.955	71.9397
194	Incidence	Australasia	Both	15-19 years	Periodontal diseases	Rate	2021	262.497	511.909	122.491
195	Incidence	Australasia	Both	25-29 years	Periodontal diseases	Rate	1990	844.77	1476.49	409.321
196	Incidence	Australasia	Both	25-29 years	Periodontal diseases	Rate	2021	1146.38	2246.45	533.713
197	Incidence	Australasia	Both	30-34 years	Periodontal diseases	Rate	1990	1136.21	1915.2	572.678
198	Incidence	Australasia	Both	30-34 years	Periodontal diseases	Rate	2021	1397.64	2529.79	686.039
199	Incidence	Australasia	Both	35-39 years	Periodontal diseases	Rate	1990	1404.52	2379.52	626.499
200	Incidence	Australasia	Both	35-39 years	Periodontal diseases	Rate	2021	1528.71	2694.19	723.647
201	Incidence	Australasia	Both	40-44 years	Periodontal diseases	Rate	1990	1595.18	2731.61	683.475
202	Incidence	Australasia	Both	40-44 years	Periodontal diseases	Rate	2021	1625.57	2606.91	678.896
203	Incidence	Australasia	Both	45-49 years	Periodontal diseases	Rate	1990	1649.79	2652.74	678.401
204	Incidence	Australasia	Both	45-49 years	Periodontal diseases	Rate	2021	1677.26	2554.88	848.618
205	Incidence	Australasia	Both	50-54 years	Periodontal diseases	Rate	1990	1671.59	2559.11	865.475
206	Incidence	Australasia	Both	50-54 years	Periodontal diseases	Rate	2021	1671.92	2666.12	743.277
207	Incidence	Australasia	Both	55-59 years	Periodontal diseases	Rate	1990	1637.5	2621.13	837.059
208	Incidence	Australasia	Both	55-59 years	Periodontal diseases	Rate	2021	1606.92	2578.68	731.947
209	Incidence	Australasia	Both	60-64 years	Periodontal diseases	Rate	1990	1634.54	2513.06	829.25
210	Incidence	Australasia	Both	60-64 years	Periodontal diseases	Rate	2021	1619.64	2486.32	806.828
211	Incidence	Australasia	Both	65-69 years	Periodontal diseases	Rate	1990	1709.59	2602.49	739.639
212	Incidence	Australasia	Both	65-69 years	Periodontal diseases	Rate	2021	1709.01	2678.94	694.952
213	Incidence	High-income North America	Both	70+ years	Periodontal diseases	Rate	1990	2012.42	2504.9	1457.05
214	Incidence	High-income North America	Both	70+ years	Periodontal diseases	Rate	2021	1961.42	2365.17	1444.96
215	Incidence	Caribbean	Both	70+ years	Periodontal diseases	Rate	1990	1902.56	2422.46	1316.59
216	Incidence	Caribbean	Both	70+ years	Periodontal diseases	Rate	2021	1901.3	2449.48	1127.84
217	Incidence	Southern Latin America	Both	70+ years	Periodontal diseases	Rate	1990	1894.49	2474.43	1227.62
218	Incidence	Southern Latin America	Both	70+ years	Periodontal diseases	Rate	2021	1880.75	2474.26	1093.21
219	Incidence	Central Latin America	Both	70+ years	Periodontal diseases	Rate	1990	1902.66	2377.59	1318.92
220	Incidence	Central Latin America	Both	70+ years	Periodontal diseases	Rate	2021	1908.83	2386.45	1257.49
221	Incidence	Tropical Latin America	Both	70+ years	Periodontal diseases	Rate	1990	1966.26	2518.63	1333.69
222	Incidence	Tropical Latin America	Both	70+ years	Periodontal diseases	Rate	2021	1924.15	2321.71	1478.09
223	Incidence	North Africa and Middle East	Both	70+ years	Periodontal diseases	Rate	1990	1896.9	2483.48	1273.66
224	Incidence	North Africa and Middle East	Both	70+ years	Periodontal diseases	Rate	2021	1943.97	2438.61	1254.23
225	Incidence	South Asia	Both	70+ years	Periodontal diseases	Rate	1990	1885.64	2458.26	1226.38
226	Incidence	South Asia	Both	70+ years	Periodontal diseases	Rate	2021	1859.33	2318.6	1248.75
227	Incidence	Central Sub-Saharan Africa	Both	70+ years	Periodontal diseases	Rate	1990	1898.81	2494.69	1198.17
228	Incidence	Central Sub-Saharan Africa	Both	70+ years	Periodontal diseases	Rate	2021	1799.48	2509.78	841.958
229	Incidence	Caribbean	Both	5-9 years	Periodontal diseases	Rate	1990	0	0	0
230	Incidence	Caribbean	Both	5-9 years	Periodontal diseases	Rate	2021	0	0	0
231	Incidence	Caribbean	Both	10-14 years	Periodontal diseases	Rate	1990	0	0	0
232	Incidence	Caribbean	Both	10-14 years	Periodontal diseases	Rate	2021	0	0	0
233	Incidence	Caribbean	Both	15-19 years	Periodontal diseases	Rate	1990	476.029	905.227	212.704
234	Incidence	Caribbean	Both	15-19 years	Periodontal diseases	Rate	2021	382.024	738.209	183.007
235	Incidence	Caribbean	Both	25-29 years	Periodontal diseases	Rate	1990	1910.54	2952.56	994.647
236	Incidence	Caribbean	Both	25-29 years	Periodontal diseases	Rate	2021	1635.98	2813.32	803.661
237	Incidence	Caribbean	Both	30-34 years	Periodontal diseases	Rate	1990	2102.22	3027.6	1214.36
238	Incidence	Caribbean	Both	30-34 years	Periodontal diseases	Rate	2021	1923.96	3059.64	978.777
239	Incidence	Caribbean	Both	35-39 years	Periodontal diseases	Rate	1990	2156.73	3042.17	1150.8
240	Incidence	Caribbean	Both	35-39 years	Periodontal diseases	Rate	2021	1995.76	2984.04	1062.12
241	Incidence	Caribbean	Both	40-44 years	Periodontal diseases	Rate	1990	2117.62	2962.26	1064.75
242	Incidence	Caribbean	Both	40-44 years	Periodontal diseases	Rate	2021	1973.78	2874.6	928.117
243	Incidence	Caribbean	Both	45-49 years	Periodontal diseases	Rate	1990	1998.27	2702.16	1084.1
244	Incidence	Caribbean	Both	45-49 years	Periodontal diseases	Rate	2021	1920.92	2734.92	1067.66
245	Incidence	Caribbean	Both	50-54 years	Periodontal diseases	Rate	1990	1941.71	2591.82	1241.83
246	Incidence	Caribbean	Both	50-54 years	Periodontal diseases	Rate	2021	1863.57	2692.6	902.752
247	Incidence	Caribbean	Both	55-59 years	Periodontal diseases	Rate	1990	1892.81	2603.17	1135.35
248	Incidence	Caribbean	Both	55-59 years	Periodontal diseases	Rate	2021	1785.64	2618.8	913.573
249	Incidence	Caribbean	Both	60-64 years	Periodontal diseases	Rate	1990	1853.91	2552.77	1112.17
250	Incidence	Caribbean	Both	60-64 years	Periodontal diseases	Rate	2021	1769.04	2558.97	948.519
251	Incidence	Caribbean	Both	65-69 years	Periodontal diseases	Rate	1990	1868.16	2551.12	1057
252	Incidence	Caribbean	Both	65-69 years	Periodontal diseases	Rate	2021	1811.55	2631.23	838.401
253	Incidence	Southern Sub-Saharan Africa	Both	70+ years	Periodontal diseases	Rate	1990	1755.88	2424.76	1059.83
254	Incidence	Southern Sub-Saharan Africa	Both	70+ years	Periodontal diseases	Rate	2021	1679.01	2260.99	972.654
255	Incidence	Eastern Sub-Saharan Africa	Both	70+ years	Periodontal diseases	Rate	1990	1884.21	2471.56	1218.88
256	Incidence	Eastern Sub-Saharan Africa	Both	70+ years	Periodontal diseases	Rate	2021	1854.89	2376.4	1150.35
257	Incidence	Western Sub-Saharan Africa	Both	70+ years	Periodontal diseases	Rate	1990	1864.74	2429.82	1238.2
258	Incidence	Western Sub-Saharan Africa	Both	70+ years	Periodontal diseases	Rate	2021	1567.76	2034.9	1018.51
259	Incidence	Eastern Europe	Both	5-9 years	Periodontal diseases	Rate	1990	0	0	0
260	Incidence	Eastern Europe	Both	5-9 years	Periodontal diseases	Rate	2021	0	0	0
261	Incidence	Eastern Europe	Both	10-14 years	Periodontal diseases	Rate	1990	0	0	0
262	Incidence	Eastern Europe	Both	10-14 years	Periodontal diseases	Rate	2021	0	0	0
263	Incidence	Eastern Europe	Both	15-19 years	Periodontal diseases	Rate	1990	175.703	347.225	71.2832
264	Incidence	Eastern Europe	Both	15-19 years	Periodontal diseases	Rate	2021	147.009	288.719	64.2309
265	Incidence	Eastern Europe	Both	25-29 years	Periodontal diseases	Rate	1990	1060.93	1848.76	520.81
266	Incidence	Eastern Europe	Both	25-29 years	Periodontal diseases	Rate	2021	981.38	2033.13	438.926
267	Incidence	Eastern Europe	Both	30-34 years	Periodontal diseases	Rate	1990	1615.63	2571.46	834.499
268	Incidence	Eastern Europe	Both	30-34 years	Periodontal diseases	Rate	2021	1538.71	2776.43	733.542
269	Incidence	Eastern Europe	Both	35-39 years	Periodontal diseases	Rate	1990	2062.13	3058.54	1008.94
270	Incidence	Eastern Europe	Both	35-39 years	Periodontal diseases	Rate	2021	1936.49	3062.3	977.77
271	Incidence	Eastern Europe	Both	40-44 years	Periodontal diseases	Rate	1990	2221.3	3148.43	1144.24
272	Incidence	Eastern Europe	Both	40-44 years	Periodontal diseases	Rate	2021	2089.31	3037.39	968.082
273	Incidence	Eastern Europe	Both	45-49 years	Periodontal diseases	Rate	1990	2143.67	2940.06	1165.67
274	Incidence	Eastern Europe	Both	45-49 years	Periodontal diseases	Rate	2021	2076.02	2928.54	1176.53
275	Incidence	Eastern Europe	Both	50-54 years	Periodontal diseases	Rate	1990	2080.38	2774.63	1289.27
276	Incidence	Eastern Europe	Both	50-54 years	Periodontal diseases	Rate	2021	2012.45	2874.89	979.807
277	Incidence	Eastern Europe	Both	55-59 years	Periodontal diseases	Rate	1990	2012.04	2789.92	1199.67
278	Incidence	Eastern Europe	Both	55-59 years	Periodontal diseases	Rate	2021	1916.84	2765.57	981.506
279	Incidence	Eastern Europe	Both	60-64 years	Periodontal diseases	Rate	1990	1949.12	2683.42	1162.19
280	Incidence	Eastern Europe	Both	60-64 years	Periodontal diseases	Rate	2021	1876.01	2669.93	1016.12
281	Incidence	Eastern Europe	Both	65-69 years	Periodontal diseases	Rate	1990	1938.85	2640.78	1088.42
282	Incidence	Eastern Europe	Both	65-69 years	Periodontal diseases	Rate	2021	1891.5	2697.47	901.204
283	Incidence	Central Latin America	Both	5-9 years	Periodontal diseases	Rate	1990	0	0	0
284	Incidence	Central Latin America	Both	5-9 years	Periodontal diseases	Rate	2021	0	0	0
285	Incidence	Central Latin America	Both	10-14 years	Periodontal diseases	Rate	1990	0	0	0
286	Incidence	Central Latin America	Both	10-14 years	Periodontal diseases	Rate	2021	0	0	0
287	Incidence	Central Latin America	Both	15-19 years	Periodontal diseases	Rate	1990	398.972	736.349	189.817
288	Incidence	Central Latin America	Both	15-19 years	Periodontal diseases	Rate	2021	398.128	701.241	217.807
289	Incidence	Central Latin America	Both	25-29 years	Periodontal diseases	Rate	1990	1796.87	2824.11	986.738
290	Incidence	Central Latin America	Both	25-29 years	Periodontal diseases	Rate	2021	1798.11	2772.81	1018.53
291	Incidence	Central Latin America	Both	30-34 years	Periodontal diseases	Rate	1990	2078.51	2955.34	1239.24
292	Incidence	Central Latin America	Both	30-34 years	Periodontal diseases	Rate	2021	2098.21	3006.83	1262.12
293	Incidence	Central Latin America	Both	35-39 years	Periodontal diseases	Rate	1990	2168.15	3020.91	1219.51
294	Incidence	Central Latin America	Both	35-39 years	Periodontal diseases	Rate	2021	2133.78	2943.13	1331.8
295	Incidence	Central Latin America	Both	40-44 years	Periodontal diseases	Rate	1990	2134.01	2926.77	1116.22
296	Incidence	Central Latin America	Both	40-44 years	Periodontal diseases	Rate	2021	2068.3	2803.95	1182.5
297	Incidence	Central Latin America	Both	45-49 years	Periodontal diseases	Rate	1990	2016.15	2712.63	1166.49
298	Incidence	Central Latin America	Both	45-49 years	Periodontal diseases	Rate	2021	1973.84	2659.75	1257.25
299	Incidence	Central Latin America	Both	50-54 years	Periodontal diseases	Rate	1990	1956.08	2554.73	1290.27
300	Incidence	Central Latin America	Both	50-54 years	Periodontal diseases	Rate	2021	1903.47	2567.08	1110.01
301	Incidence	Central Latin America	Both	55-59 years	Periodontal diseases	Rate	1990	1903.62	2589.87	1185.75
302	Incidence	Central Latin America	Both	55-59 years	Periodontal diseases	Rate	2021	1833.78	2503.71	1097.93
303	Incidence	Central Latin America	Both	60-64 years	Periodontal diseases	Rate	1990	1867.09	2523.05	1164.28
304	Incidence	Central Latin America	Both	60-64 years	Periodontal diseases	Rate	2021	1816.62	2456.5	1098.64
305	Incidence	Central Latin America	Both	65-69 years	Periodontal diseases	Rate	1990	1881.36	2511.32	1106.26
306	Incidence	Central Latin America	Both	65-69 years	Periodontal diseases	Rate	2021	1847.96	2531.35	1038.14
307	Incidence	Central Sub-Saharan Africa	Both	5-9 years	Periodontal diseases	Rate	1990	0	0	0
308	Incidence	Central Sub-Saharan Africa	Both	5-9 years	Periodontal diseases	Rate	2021	0	0	0
309	Incidence	Central Sub-Saharan Africa	Both	10-14 years	Periodontal diseases	Rate	1990	0	0	0
310	Incidence	Central Sub-Saharan Africa	Both	10-14 years	Periodontal diseases	Rate	2021	0	0	0
311	Incidence	Central Sub-Saharan Africa	Both	15-19 years	Periodontal diseases	Rate	1990	828.792	1596.3	378.54
312	Incidence	Central Sub-Saharan Africa	Both	15-19 years	Periodontal diseases	Rate	2021	256.971	486.966	121.2
313	Incidence	Central Sub-Saharan Africa	Both	25-29 years	Periodontal diseases	Rate	1990	2208.82	3256.4	1152.97
314	Incidence	Central Sub-Saharan Africa	Both	25-29 years	Periodontal diseases	Rate	2021	935.176	1901.74	417.985
315	Incidence	Central Sub-Saharan Africa	Both	30-34 years	Periodontal diseases	Rate	1990	2137.55	3075.12	1215.39
316	Incidence	Central Sub-Saharan Africa	Both	30-34 years	Periodontal diseases	Rate	2021	1150.86	2234.76	530.156
317	Incidence	Central Sub-Saharan Africa	Both	35-39 years	Periodontal diseases	Rate	1990	2084.88	3005.39	1058.5
318	Incidence	Central Sub-Saharan Africa	Both	35-39 years	Periodontal diseases	Rate	2021	1314.95	2380.53	611.462
319	Incidence	Central Sub-Saharan Africa	Both	40-44 years	Periodontal diseases	Rate	1990	2030.02	2887.72	941.88
320	Incidence	Central Sub-Saharan Africa	Both	40-44 years	Periodontal diseases	Rate	2021	1455.73	2466.68	581.742
321	Incidence	Central Sub-Saharan Africa	Both	45-49 years	Periodontal diseases	Rate	1990	1929.32	2684.55	966.383
322	Incidence	Central Sub-Saharan Africa	Both	45-49 years	Periodontal diseases	Rate	2021	1553.16	2517.9	718.438
323	Incidence	Central Sub-Saharan Africa	Both	50-54 years	Periodontal diseases	Rate	1990	1899.64	2592.39	1163.8
324	Incidence	Central Sub-Saharan Africa	Both	50-54 years	Periodontal diseases	Rate	2021	1584.41	2716.72	678.916
325	Incidence	Central Sub-Saharan Africa	Both	55-59 years	Periodontal diseases	Rate	1990	1877.61	2622.08	1121.24
326	Incidence	Central Sub-Saharan Africa	Both	55-59 years	Periodontal diseases	Rate	2021	1543.94	2589.12	669.261
327	Incidence	Central Sub-Saharan Africa	Both	60-64 years	Periodontal diseases	Rate	1990	1858.91	2590.54	1097.7
328	Incidence	Central Sub-Saharan Africa	Both	60-64 years	Periodontal diseases	Rate	2021	1562.24	2565.73	769.41
329	Incidence	Central Sub-Saharan Africa	Both	65-69 years	Periodontal diseases	Rate	1990	1883.38	2612.12	1035.53
330	Incidence	Central Sub-Saharan Africa	Both	65-69 years	Periodontal diseases	Rate	2021	1654.27	2743.95	651.285
331	Incidence	High-income North America	Both	5-9 years	Periodontal diseases	Rate	1990	0	0	0
332	Incidence	High-income North America	Both	5-9 years	Periodontal diseases	Rate	2021	0	0	0
333	Incidence	High-income North America	Both	10-14 years	Periodontal diseases	Rate	1990	0	0	0
334	Incidence	High-income North America	Both	10-14 years	Periodontal diseases	Rate	2021	0	0	0
335	Incidence	High-income North America	Both	15-19 years	Periodontal diseases	Rate	1990	149.882	296.841	59.5873
336	Incidence	High-income North America	Both	15-19 years	Periodontal diseases	Rate	2021	145.267	231.185	81.4708
337	Incidence	High-income North America	Both	25-29 years	Periodontal diseases	Rate	1990	758.416	1304.7	370.607
338	Incidence	High-income North America	Both	25-29 years	Periodontal diseases	Rate	2021	753.538	1271.86	421.969
339	Incidence	High-income North America	Both	30-34 years	Periodontal diseases	Rate	1990	1151.17	1928.64	576.554
340	Incidence	High-income North America	Both	30-34 years	Periodontal diseases	Rate	2021	1111.59	1743.71	661.36
341	Incidence	High-income North America	Both	35-39 years	Periodontal diseases	Rate	1990	1604.99	2540.12	731.384
342	Incidence	High-income North America	Both	35-39 years	Periodontal diseases	Rate	2021	1481.94	2181.63	917.091
343	Incidence	High-income North America	Both	40-44 years	Periodontal diseases	Rate	1990	1941.11	2962.83	931.198
344	Incidence	High-income North America	Both	40-44 years	Periodontal diseases	Rate	2021	1772.2	2525.53	1078.31
345	Incidence	High-income North America	Both	45-49 years	Periodontal diseases	Rate	1990	2061.05	2979.58	1029.17
346	Incidence	High-income North America	Both	45-49 years	Periodontal diseases	Rate	2021	1921.25	2580.37	1231.97
347	Incidence	High-income North America	Both	50-54 years	Periodontal diseases	Rate	1990	2122.46	2863.56	1321.65
348	Incidence	High-income North America	Both	50-54 years	Periodontal diseases	Rate	2021	1970.77	2601.75	1271.14
349	Incidence	High-income North America	Both	55-59 years	Periodontal diseases	Rate	1990	2109.18	2897.78	1284.18
350	Incidence	High-income North America	Both	55-59 years	Periodontal diseases	Rate	2021	1932.16	2564.34	1314.84
351	Incidence	High-income North America	Both	60-64 years	Periodontal diseases	Rate	1990	2059.46	2776.16	1273.37
352	Incidence	High-income North America	Both	60-64 years	Periodontal diseases	Rate	2021	1917.42	2542.9	1287.53
353	Incidence	High-income North America	Both	65-69 years	Periodontal diseases	Rate	1990	2047.22	2722.23	1198.42
354	Incidence	High-income North America	Both	65-69 years	Periodontal diseases	Rate	2021	1943.87	2584.6	1243.97
355	Incidence	South Asia	Both	5-9 years	Periodontal diseases	Rate	1990	0	0	0
356	Incidence	South Asia	Both	5-9 years	Periodontal diseases	Rate	2021	0	0	0
357	Incidence	South Asia	Both	10-14 years	Periodontal diseases	Rate	1990	0	0	0
358	Incidence	South Asia	Both	10-14 years	Periodontal diseases	Rate	2021	0	0	0
359	Incidence	South Asia	Both	15-19 years	Periodontal diseases	Rate	1990	668.539	1228.5	313.326
360	Incidence	South Asia	Both	15-19 years	Periodontal diseases	Rate	2021	733.18	1165.8	424.996
361	Incidence	South Asia	Both	25-29 years	Periodontal diseases	Rate	1990	2009	3052.08	1055.5
362	Incidence	South Asia	Both	25-29 years	Periodontal diseases	Rate	2021	2219.04	3057.9	1418.42
363	Incidence	South Asia	Both	30-34 years	Periodontal diseases	Rate	1990	2103.7	3031.29	1196.37
364	Incidence	South Asia	Both	30-34 years	Periodontal diseases	Rate	2021	2213.28	2907.91	1455.37
365	Incidence	South Asia	Both	35-39 years	Periodontal diseases	Rate	1990	2124.26	3013.25	1115.83
366	Incidence	South Asia	Both	35-39 years	Periodontal diseases	Rate	2021	2100.55	2783.48	1395.06
367	Incidence	South Asia	Both	40-44 years	Periodontal diseases	Rate	1990	2076.04	2934.29	1023.33
368	Incidence	South Asia	Both	40-44 years	Periodontal diseases	Rate	2021	1989.24	2617.1	1225
369	Incidence	South Asia	Both	45-49 years	Periodontal diseases	Rate	1990	1958.91	2695.08	1006.73
370	Incidence	South Asia	Both	45-49 years	Periodontal diseases	Rate	2021	1889.89	2489.79	1250.9
371	Incidence	South Asia	Both	50-54 years	Periodontal diseases	Rate	1990	1914.21	2608.61	1192.41
372	Incidence	South Asia	Both	50-54 years	Periodontal diseases	Rate	2021	1834.96	2419.26	1126.99
373	Incidence	South Asia	Both	55-59 years	Periodontal diseases	Rate	1990	1879.46	2635.24	1130.99
374	Incidence	South Asia	Both	55-59 years	Periodontal diseases	Rate	2021	1782.95	2362.5	1131.71
375	Incidence	South Asia	Both	60-64 years	Periodontal diseases	Rate	1990	1856.23	2592.96	1080.64
376	Incidence	South Asia	Both	60-64 years	Periodontal diseases	Rate	2021	1775.63	2377.13	1130.98
377	Incidence	South Asia	Both	65-69 years	Periodontal diseases	Rate	1990	1876.94	2610.42	1020.92
378	Incidence	South Asia	Both	65-69 years	Periodontal diseases	Rate	2021	1810.24	2424.37	1105.54
379	Incidence	Eastern Sub-Saharan Africa	Both	5-9 years	Periodontal diseases	Rate	1990	0	0	0
380	Incidence	Eastern Sub-Saharan Africa	Both	5-9 years	Periodontal diseases	Rate	2021	0	0	0
381	Incidence	Eastern Sub-Saharan Africa	Both	10-14 years	Periodontal diseases	Rate	1990	0	0	0
382	Incidence	Eastern Sub-Saharan Africa	Both	10-14 years	Periodontal diseases	Rate	2021	0	0	0
383	Incidence	Eastern Sub-Saharan Africa	Both	15-19 years	Periodontal diseases	Rate	1990	891.024	1691.48	408.84
384	Incidence	Eastern Sub-Saharan Africa	Both	15-19 years	Periodontal diseases	Rate	2021	437.475	705.01	255.914
385	Incidence	Eastern Sub-Saharan Africa	Both	25-29 years	Periodontal diseases	Rate	1990	2228.08	3268.11	1179.82
386	Incidence	Eastern Sub-Saharan Africa	Both	25-29 years	Periodontal diseases	Rate	2021	1432.03	2201	865.233
387	Incidence	Eastern Sub-Saharan Africa	Both	30-34 years	Periodontal diseases	Rate	1990	2146.16	3031.79	1232
388	Incidence	Eastern Sub-Saharan Africa	Both	30-34 years	Periodontal diseases	Rate	2021	1515.2	2246.14	960.646
389	Incidence	Eastern Sub-Saharan Africa	Both	35-39 years	Periodontal diseases	Rate	1990	2094.11	2972.92	1099.36
390	Incidence	Eastern Sub-Saharan Africa	Both	35-39 years	Periodontal diseases	Rate	2021	1547.25	2293.41	995.542
391	Incidence	Eastern Sub-Saharan Africa	Both	40-44 years	Periodontal diseases	Rate	1990	2037.39	2877.75	983.605
392	Incidence	Eastern Sub-Saharan Africa	Both	40-44 years	Periodontal diseases	Rate	2021	1578.28	2258.39	912.194
393	Incidence	Eastern Sub-Saharan Africa	Both	45-49 years	Periodontal diseases	Rate	1990	1936.42	2657.49	1013.67
394	Incidence	Eastern Sub-Saharan Africa	Both	45-49 years	Periodontal diseases	Rate	2021	1602.37	2244.26	974.223
395	Incidence	Eastern Sub-Saharan Africa	Both	50-54 years	Periodontal diseases	Rate	1990	1901.47	2559.11	1210.84
396	Incidence	Eastern Sub-Saharan Africa	Both	50-54 years	Periodontal diseases	Rate	2021	1624.97	2407.46	965.722
397	Incidence	Eastern Sub-Saharan Africa	Both	55-59 years	Periodontal diseases	Rate	1990	1869.72	2585.78	1114.51
398	Incidence	Eastern Sub-Saharan Africa	Both	55-59 years	Periodontal diseases	Rate	2021	1605.86	2319.35	956.039
399	Incidence	Eastern Sub-Saharan Africa	Both	60-64 years	Periodontal diseases	Rate	1990	1842.78	2552.32	1086.15
400	Incidence	Eastern Sub-Saharan Africa	Both	60-64 years	Periodontal diseases	Rate	2021	1636.08	2346.75	991.217
401	Incidence	Eastern Sub-Saharan Africa	Both	65-69 years	Periodontal diseases	Rate	1990	1860.64	2562.7	1032.8
402	Incidence	Eastern Sub-Saharan Africa	Both	65-69 years	Periodontal diseases	Rate	2021	1733.44	2467.9	971.637
403	Incidence	High-income Asia Pacific	Both	5-9 years	Periodontal diseases	Rate	1990	0	0	0
404	Incidence	High-income Asia Pacific	Both	5-9 years	Periodontal diseases	Rate	2021	0	0	0
405	Incidence	High-income Asia Pacific	Both	10-14 years	Periodontal diseases	Rate	1990	0	0	0
406	Incidence	High-income Asia Pacific	Both	10-14 years	Periodontal diseases	Rate	2021	0	0	0
407	Incidence	High-income Asia Pacific	Both	15-19 years	Periodontal diseases	Rate	1990	112.648	227.109	42.9866
408	Incidence	High-income Asia Pacific	Both	15-19 years	Periodontal diseases	Rate	2021	107.1	210.185	46.716
409	Incidence	High-income Asia Pacific	Both	25-29 years	Periodontal diseases	Rate	1990	550.931	964.292	262.305
410	Incidence	High-income Asia Pacific	Both	25-29 years	Periodontal diseases	Rate	2021	594.18	1253.35	258.454
411	Incidence	High-income Asia Pacific	Both	30-34 years	Periodontal diseases	Rate	1990	851.924	1469.01	426.119
412	Incidence	High-income Asia Pacific	Both	30-34 years	Periodontal diseases	Rate	2021	936.284	1884.9	429.797
413	Incidence	High-income Asia Pacific	Both	35-39 years	Periodontal diseases	Rate	1990	1270.54	2115.1	566.18
414	Incidence	High-income Asia Pacific	Both	35-39 years	Periodontal diseases	Rate	2021	1303.37	2363.43	612.932
415	Incidence	High-income Asia Pacific	Both	40-44 years	Periodontal diseases	Rate	1990	1627.49	2710.07	728.704
416	Incidence	High-income Asia Pacific	Both	40-44 years	Periodontal diseases	Rate	2021	1610.68	2594.31	682.339
417	Incidence	High-income Asia Pacific	Both	45-49 years	Periodontal diseases	Rate	1990	1762.37	2753.49	791.457
418	Incidence	High-income Asia Pacific	Both	45-49 years	Periodontal diseases	Rate	2021	1811.38	2739.14	941.662
419	Incidence	High-income Asia Pacific	Both	50-54 years	Periodontal diseases	Rate	1990	1818.36	2697.46	990.728
420	Incidence	High-income Asia Pacific	Both	50-54 years	Periodontal diseases	Rate	2021	1868.27	2864.68	866.739
421	Incidence	High-income Asia Pacific	Both	55-59 years	Periodontal diseases	Rate	1990	1773.53	2759.29	947.003
422	Incidence	High-income Asia Pacific	Both	55-59 years	Periodontal diseases	Rate	2021	1820.01	2755.83	885.872
423	Incidence	High-income Asia Pacific	Both	60-64 years	Periodontal diseases	Rate	1990	1734.99	2647.33	907.384
424	Incidence	High-income Asia Pacific	Both	60-64 years	Periodontal diseases	Rate	2021	1812.23	2745.83	940.266
425	Incidence	High-income Asia Pacific	Both	65-69 years	Periodontal diseases	Rate	1990	1767.34	2679.86	804.453
426	Incidence	High-income Asia Pacific	Both	65-69 years	Periodontal diseases	Rate	2021	1862.38	2763.1	801.285
427	Incidence	Tropical Latin America	Both	5-9 years	Periodontal diseases	Rate	1990	0	0	0
428	Incidence	Tropical Latin America	Both	5-9 years	Periodontal diseases	Rate	2021	0	0	0
429	Incidence	Tropical Latin America	Both	10-14 years	Periodontal diseases	Rate	1990	0	0	0
430	Incidence	Tropical Latin America	Both	10-14 years	Periodontal diseases	Rate	2021	0	0	0
431	Incidence	Tropical Latin America	Both	15-19 years	Periodontal diseases	Rate	1990	256.421	491.05	114.411
432	Incidence	Tropical Latin America	Both	15-19 years	Periodontal diseases	Rate	2021	291.499	485.974	166.935
433	Incidence	Tropical Latin America	Both	25-29 years	Periodontal diseases	Rate	1990	1158.39	1950.37	572.885
434	Incidence	Tropical Latin America	Both	25-29 years	Periodontal diseases	Rate	2021	1539.94	2284.89	892.59
435	Incidence	Tropical Latin America	Both	30-34 years	Periodontal diseases	Rate	1990	1531.68	2429.57	809.376
436	Incidence	Tropical Latin America	Both	30-34 years	Periodontal diseases	Rate	2021	1963.39	2727.44	1298.23
437	Incidence	Tropical Latin America	Both	35-39 years	Periodontal diseases	Rate	1990	1861.27	2828.66	894.151
438	Incidence	Tropical Latin America	Both	35-39 years	Periodontal diseases	Rate	2021	2154.87	2880.26	1412.52
439	Incidence	Tropical Latin America	Both	40-44 years	Periodontal diseases	Rate	1990	2051	3032.29	992.984
440	Incidence	Tropical Latin America	Both	40-44 years	Periodontal diseases	Rate	2021	2153.31	2832.88	1383.88
441	Incidence	Tropical Latin America	Both	45-49 years	Periodontal diseases	Rate	1990	2064.1	2886.97	1076.29
442	Incidence	Tropical Latin America	Both	45-49 years	Periodontal diseases	Rate	2021	2046.24	2605.95	1384.34
443	Incidence	Tropical Latin America	Both	50-54 years	Periodontal diseases	Rate	1990	2064.84	2763.99	1292.25
444	Incidence	Tropical Latin America	Both	50-54 years	Periodontal diseases	Rate	2021	1973.1	2493.7	1404.77
445	Incidence	Tropical Latin America	Both	55-59 years	Periodontal diseases	Rate	1990	2021.71	2770.06	1228.56
446	Incidence	Tropical Latin America	Both	55-59 years	Periodontal diseases	Rate	2021	1899.73	2447.16	1368.94
447	Incidence	Tropical Latin America	Both	60-64 years	Periodontal diseases	Rate	1990	1968.94	2664.59	1217.5
448	Incidence	Tropical Latin America	Both	60-64 years	Periodontal diseases	Rate	2021	1861.98	2416.55	1291.21
449	Incidence	Tropical Latin America	Both	65-69 years	Periodontal diseases	Rate	1990	1967.25	2645.16	1160.57
450	Incidence	Tropical Latin America	Both	65-69 years	Periodontal diseases	Rate	2021	1884.17	2434.89	1264.89
451	Incidence	North Africa and Middle East	Both	5-9 years	Periodontal diseases	Rate	1990	0	0	0
452	Incidence	North Africa and Middle East	Both	5-9 years	Periodontal diseases	Rate	2021	0	0	0
453	Incidence	North Africa and Middle East	Both	10-14 years	Periodontal diseases	Rate	1990	0	0	0
454	Incidence	North Africa and Middle East	Both	10-14 years	Periodontal diseases	Rate	2021	0	0	0
455	Incidence	North Africa and Middle East	Both	15-19 years	Periodontal diseases	Rate	1990	279.88	517.605	136.009
456	Incidence	North Africa and Middle East	Both	15-19 years	Periodontal diseases	Rate	2021	299.265	533.026	161.853
457	Incidence	North Africa and Middle East	Both	25-29 years	Periodontal diseases	Rate	1990	895.535	1488.48	477.669
458	Incidence	North Africa and Middle East	Both	25-29 years	Periodontal diseases	Rate	2021	1205.45	2161.04	635.193
459	Incidence	North Africa and Middle East	Both	30-34 years	Periodontal diseases	Rate	1990	1111.77	1780.25	594.002
460	Incidence	North Africa and Middle East	Both	30-34 years	Periodontal diseases	Rate	2021	1529.2	2493.76	857.541
461	Incidence	North Africa and Middle East	Both	35-39 years	Periodontal diseases	Rate	1990	1382.75	2176.35	675.074
462	Incidence	North Africa and Middle East	Both	35-39 years	Periodontal diseases	Rate	2021	1780.85	2653.09	1036.2
463	Incidence	North Africa and Middle East	Both	40-44 years	Periodontal diseases	Rate	1990	1643.94	2633.93	798.181
464	Incidence	North Africa and Middle East	Both	40-44 years	Periodontal diseases	Rate	2021	1929	2715.34	1053.9
465	Incidence	North Africa and Middle East	Both	45-49 years	Periodontal diseases	Rate	1990	1805.88	2681.93	906.478
466	Incidence	North Africa and Middle East	Both	45-49 years	Periodontal diseases	Rate	2021	1972.96	2680.03	1241.15
467	Incidence	North Africa and Middle East	Both	50-54 years	Periodontal diseases	Rate	1990	1917.82	2673.77	1163.21
468	Incidence	North Africa and Middle East	Both	50-54 years	Periodontal diseases	Rate	2021	1973.62	2657.68	1153.42
469	Incidence	North Africa and Middle East	Both	55-59 years	Periodontal diseases	Rate	1990	1921.59	2700.83	1176.59
470	Incidence	North Africa and Middle East	Both	55-59 years	Periodontal diseases	Rate	2021	1922.24	2618.66	1166.66
471	Incidence	North Africa and Middle East	Both	60-64 years	Periodontal diseases	Rate	1990	1898.24	2652.02	1123.79
472	Incidence	North Africa and Middle East	Both	60-64 years	Periodontal diseases	Rate	2021	1900.48	2548.68	1167.01
473	Incidence	North Africa and Middle East	Both	65-69 years	Periodontal diseases	Rate	1990	1917.57	2651.09	1050.45
474	Incidence	North Africa and Middle East	Both	65-69 years	Periodontal diseases	Rate	2021	1914.1	2605.47	1104.75
475	Incidence	Southern Latin America	Both	5-9 years	Periodontal diseases	Rate	1990	0	0	0
476	Incidence	Southern Latin America	Both	5-9 years	Periodontal diseases	Rate	2021	0	0	0
477	Incidence	Southern Latin America	Both	10-14 years	Periodontal diseases	Rate	1990	0	0	0
478	Incidence	Southern Latin America	Both	10-14 years	Periodontal diseases	Rate	2021	0	0	0
479	Incidence	Southern Latin America	Both	15-19 years	Periodontal diseases	Rate	1990	320.152	631.337	151.319
480	Incidence	Southern Latin America	Both	15-19 years	Periodontal diseases	Rate	2021	357.807	688.151	170.558
481	Incidence	Southern Latin America	Both	25-29 years	Periodontal diseases	Rate	1990	1321.38	2210.31	655.772
482	Incidence	Southern Latin America	Both	25-29 years	Periodontal diseases	Rate	2021	1537.83	2756.54	726.153
483	Incidence	Southern Latin America	Both	30-34 years	Periodontal diseases	Rate	1990	1604.02	2621.96	835.272
484	Incidence	Southern Latin America	Both	30-34 years	Periodontal diseases	Rate	2021	1795.52	3011.88	872.126
485	Incidence	Southern Latin America	Both	35-39 years	Periodontal diseases	Rate	1990	1825.16	2853.71	851.667
486	Incidence	Southern Latin America	Both	35-39 years	Periodontal diseases	Rate	2021	1880.31	2931.59	951.297
487	Incidence	Southern Latin America	Both	40-44 years	Periodontal diseases	Rate	1990	1945.83	2995.79	916.735
488	Incidence	Southern Latin America	Both	40-44 years	Periodontal diseases	Rate	2021	1890.88	2838.69	838.769
489	Incidence	Southern Latin America	Both	45-49 years	Periodontal diseases	Rate	1990	1930.92	2841.42	893.316
490	Incidence	Southern Latin America	Both	45-49 years	Periodontal diseases	Rate	2021	1868.09	2764.93	945.017
491	Incidence	Southern Latin America	Both	50-54 years	Periodontal diseases	Rate	1990	1916.08	2705.9	1036.65
492	Incidence	Southern Latin America	Both	50-54 years	Periodontal diseases	Rate	2021	1829.93	2730.09	824.34
493	Incidence	Southern Latin America	Both	55-59 years	Periodontal diseases	Rate	1990	1867.67	2704.52	1057.22
494	Incidence	Southern Latin America	Both	55-59 years	Periodontal diseases	Rate	2021	1766.69	2644.29	867.189
495	Incidence	Southern Latin America	Both	60-64 years	Periodontal diseases	Rate	1990	1834.54	2632.02	1010.31
496	Incidence	Southern Latin America	Both	60-64 years	Periodontal diseases	Rate	2021	1765.24	2671.8	927.133
497	Incidence	Southern Latin America	Both	65-69 years	Periodontal diseases	Rate	1990	1861.74	2650.71	930.589
498	Incidence	Southern Latin America	Both	65-69 years	Periodontal diseases	Rate	2021	1807.26	2666.05	775.281
499	Incidence	Southern Sub-Saharan Africa	Both	5-9 years	Periodontal diseases	Rate	1990	0	0	0
500	Incidence	Southern Sub-Saharan Africa	Both	5-9 years	Periodontal diseases	Rate	2021	0	0	0
501	Incidence	Southern Sub-Saharan Africa	Both	10-14 years	Periodontal diseases	Rate	1990	0	0	0
502	Incidence	Southern Sub-Saharan Africa	Both	10-14 years	Periodontal diseases	Rate	2021	0	0	0
503	Incidence	Southern Sub-Saharan Africa	Both	15-19 years	Periodontal diseases	Rate	1990	146.336	285.375	59.4091
504	Incidence	Southern Sub-Saharan Africa	Both	15-19 years	Periodontal diseases	Rate	2021	119.468	195.231	68.0417
505	Incidence	Southern Sub-Saharan Africa	Both	25-29 years	Periodontal diseases	Rate	1990	559.612	962.698	268.429
506	Incidence	Southern Sub-Saharan Africa	Both	25-29 years	Periodontal diseases	Rate	2021	445.152	772.99	248.392
507	Incidence	Southern Sub-Saharan Africa	Both	30-34 years	Periodontal diseases	Rate	1990	755.648	1304.99	363.79
508	Incidence	Southern Sub-Saharan Africa	Both	30-34 years	Periodontal diseases	Rate	2021	597.001	1009.38	346.301
509	Incidence	Southern Sub-Saharan Africa	Both	35-39 years	Periodontal diseases	Rate	1990	1017.23	1758.77	434.406
510	Incidence	Southern Sub-Saharan Africa	Both	35-39 years	Periodontal diseases	Rate	2021	759.445	1229.66	451.059
511	Incidence	Southern Sub-Saharan Africa	Both	40-44 years	Periodontal diseases	Rate	1990	1307.24	2400.48	533.743
512	Incidence	Southern Sub-Saharan Africa	Both	40-44 years	Periodontal diseases	Rate	2021	931.748	1515.09	501.183
513	Incidence	Southern Sub-Saharan Africa	Both	45-49 years	Periodontal diseases	Rate	1990	1485.68	2489.78	574.41
514	Incidence	Southern Sub-Saharan Africa	Both	45-49 years	Periodontal diseases	Rate	2021	1087.85	1761.04	602.888
515	Incidence	Southern Sub-Saharan Africa	Both	50-54 years	Periodontal diseases	Rate	1990	1610.16	2507.98	817.946
516	Incidence	Southern Sub-Saharan Africa	Both	50-54 years	Periodontal diseases	Rate	2021	1200.66	1982.38	678.373
517	Incidence	Southern Sub-Saharan Africa	Both	55-59 years	Periodontal diseases	Rate	1990	1631.23	2688.18	826.264
518	Incidence	Southern Sub-Saharan Africa	Both	55-59 years	Periodontal diseases	Rate	2021	1229.91	1994.46	709.405
519	Incidence	Southern Sub-Saharan Africa	Both	60-64 years	Periodontal diseases	Rate	1990	1647.59	2562.23	834.354
520	Incidence	Southern Sub-Saharan Africa	Both	60-64 years	Periodontal diseases	Rate	2021	1291.95	2031.91	763.673
521	Incidence	Southern Sub-Saharan Africa	Both	65-69 years	Periodontal diseases	Rate	1990	1703.56	2629.74	753.474
522	Incidence	Southern Sub-Saharan Africa	Both	65-69 years	Periodontal diseases	Rate	2021	1431.99	2228.23	746.024
523	Incidence	Western Sub-Saharan Africa	Both	5-9 years	Periodontal diseases	Rate	1990	0	0	0
524	Incidence	Western Sub-Saharan Africa	Both	5-9 years	Periodontal diseases	Rate	2021	0	0	0
525	Incidence	Western Sub-Saharan Africa	Both	10-14 years	Periodontal diseases	Rate	1990	0	0	0
526	Incidence	Western Sub-Saharan Africa	Both	10-14 years	Periodontal diseases	Rate	2021	0	0	0
527	Incidence	Western Sub-Saharan Africa	Both	15-19 years	Periodontal diseases	Rate	1990	1765.83	2643.27	974.313
528	Incidence	Western Sub-Saharan Africa	Both	15-19 years	Periodontal diseases	Rate	2021	919.865	1255.62	631.278
529	Incidence	Western Sub-Saharan Africa	Both	25-29 years	Periodontal diseases	Rate	1990	2464.07	3247.68	1408.68
530	Incidence	Western Sub-Saharan Africa	Both	25-29 years	Periodontal diseases	Rate	2021	1403.03	1950.55	920.253
531	Incidence	Western Sub-Saharan Africa	Both	30-34 years	Periodontal diseases	Rate	1990	2149.09	2943.73	1286.39
532	Incidence	Western Sub-Saharan Africa	Both	30-34 years	Periodontal diseases	Rate	2021	1367.69	1888.68	904.928
533	Incidence	Western Sub-Saharan Africa	Both	35-39 years	Periodontal diseases	Rate	1990	1994.16	2773.61	1066.07
534	Incidence	Western Sub-Saharan Africa	Both	35-39 years	Periodontal diseases	Rate	2021	1344.34	1870.79	900.375
535	Incidence	Western Sub-Saharan Africa	Both	40-44 years	Periodontal diseases	Rate	1990	1906.92	2638.77	889.167
536	Incidence	Western Sub-Saharan Africa	Both	40-44 years	Periodontal diseases	Rate	2021	1340.31	1876.15	826.675
537	Incidence	Western Sub-Saharan Africa	Both	45-49 years	Periodontal diseases	Rate	1990	1822.38	2516.32	954.811
538	Incidence	Western Sub-Saharan Africa	Both	45-49 years	Periodontal diseases	Rate	2021	1333.06	1856.56	851.313
539	Incidence	Western Sub-Saharan Africa	Both	50-54 years	Periodontal diseases	Rate	1990	1805.85	2411.94	1163.27
540	Incidence	Western Sub-Saharan Africa	Both	50-54 years	Periodontal diseases	Rate	2021	1331.68	1947.68	850.857
541	Incidence	Western Sub-Saharan Africa	Both	55-59 years	Periodontal diseases	Rate	1990	1795.02	2470.5	1088.55
542	Incidence	Western Sub-Saharan Africa	Both	55-59 years	Periodontal diseases	Rate	2021	1315.57	1880.33	826.605
543	Incidence	Western Sub-Saharan Africa	Both	60-64 years	Periodontal diseases	Rate	1990	1787.36	2460.34	1049.66
544	Incidence	Western Sub-Saharan Africa	Both	60-64 years	Periodontal diseases	Rate	2021	1340.33	1917.02	851.568
545	Incidence	Western Sub-Saharan Africa	Both	65-69 years	Periodontal diseases	Rate	1990	1820.22	2500.86	999.073
546	Incidence	Western Sub-Saharan Africa	Both	65-69 years	Periodontal diseases	Rate	2021	1426.56	2065.63	884.5
547	Incidence	Southeast Asia	Both	20-24 years	Periodontal diseases	Rate	1990	635.306	1051.2	309.032
548	Incidence	Southeast Asia	Both	20-24 years	Periodontal diseases	Rate	2021	495.732	762.929	289.521
549	Incidence	Global	Both	20-24 years	Periodontal diseases	Rate	1990	846.182	1321.85	457.705
550	Incidence	Global	Both	20-24 years	Periodontal diseases	Rate	2021	970.236	1435.73	606.349
551	Incidence	East Asia	Both	20-24 years	Periodontal diseases	Rate	1990	327.999	590.747	155.484
552	Incidence	East Asia	Both	20-24 years	Periodontal diseases	Rate	2021	346.237	549.514	194.068
553	Incidence	Oceania	Both	20-24 years	Periodontal diseases	Rate	1990	385.141	671.822	184.784
554	Incidence	Oceania	Both	20-24 years	Periodontal diseases	Rate	2021	84.7508	164.335	37.3582
555	Incidence	Central Europe	Both	20-24 years	Periodontal diseases	Rate	1990	462.329	771.788	231.673
556	Incidence	Central Europe	Both	20-24 years	Periodontal diseases	Rate	2021	513.952	972.645	222.614
557	Incidence	Central Asia	Both	20-24 years	Periodontal diseases	Rate	1990	419.793	722.504	201.778
558	Incidence	Central Asia	Both	20-24 years	Periodontal diseases	Rate	2021	391.566	756.076	167.165
559	Incidence	Eastern Europe	Both	20-24 years	Periodontal diseases	Rate	1990	530.886	913.616	254.557
560	Incidence	Eastern Europe	Both	20-24 years	Periodontal diseases	Rate	2021	441.663	856.773	188.107
561	Incidence	Western Europe	Both	20-24 years	Periodontal diseases	Rate	1990	772.688	1138.1	476.122
562	Incidence	Western Europe	Both	20-24 years	Periodontal diseases	Rate	2021	585.888	1056.38	274.401
563	Incidence	Australasia	Both	20-24 years	Periodontal diseases	Rate	1990	490.484	846.12	237.662
564	Incidence	Australasia	Both	20-24 years	Periodontal diseases	Rate	2021	678.643	1288.53	299.565
565	Incidence	High-income Asia Pacific	Both	20-24 years	Periodontal diseases	Rate	1990	299.918	515.874	143.264
566	Incidence	High-income Asia Pacific	Both	20-24 years	Periodontal diseases	Rate	2021	286.213	546.304	123.576
567	Incidence	High-income North America	Both	20-24 years	Periodontal diseases	Rate	1990	407.55	702.721	195.928
568	Incidence	High-income North America	Both	20-24 years	Periodontal diseases	Rate	2021	392.665	640.786	229.36
569	Incidence	Caribbean	Both	20-24 years	Periodontal diseases	Rate	1990	1276.44	2105.3	649.785
570	Incidence	Caribbean	Both	20-24 years	Periodontal diseases	Rate	2021	996.58	1858.58	453.576
571	Incidence	Southern Latin America	Both	20-24 years	Periodontal diseases	Rate	1990	842.861	1397.73	426.172
572	Incidence	Southern Latin America	Both	20-24 years	Periodontal diseases	Rate	2021	941.976	1752.01	421.51
573	Incidence	Central Latin America	Both	20-24 years	Periodontal diseases	Rate	1990	1125.17	1839.78	591.747
574	Incidence	Central Latin America	Both	20-24 years	Periodontal diseases	Rate	2021	1083.03	1826.52	590.923
575	Incidence	Tropical Latin America	Both	20-24 years	Periodontal diseases	Rate	1990	685.164	1126.83	347.215
576	Incidence	Tropical Latin America	Both	20-24 years	Periodontal diseases	Rate	2021	861.316	1319.32	510.932
577	Incidence	North Africa and Middle East	Both	20-24 years	Periodontal diseases	Rate	1990	616.373	987.954	326.597
578	Incidence	North Africa and Middle East	Both	20-24 years	Periodontal diseases	Rate	2021	734.905	1263.11	378.226
579	Incidence	South Asia	Both	20-24 years	Periodontal diseases	Rate	1990	1510.6	2345.28	813.072
580	Incidence	South Asia	Both	20-24 years	Periodontal diseases	Rate	2021	1675.92	2374.6	1051.88
581	Incidence	Western Sub-Saharan Africa	Both	20-24 years	Periodontal diseases	Rate	1990	2622.75	3407.28	1664.8
582	Incidence	Western Sub-Saharan Africa	Both	20-24 years	Periodontal diseases	Rate	2021	1339.65	1745.29	951.023
583	Incidence	Eastern Sub-Saharan Africa	Both	20-24 years	Periodontal diseases	Rate	1990	1864.06	2780.11	998.942
584	Incidence	Eastern Sub-Saharan Africa	Both	20-24 years	Periodontal diseases	Rate	2021	1026.07	1529.44	636.465
585	Incidence	Central Sub-Saharan Africa	Both	20-24 years	Periodontal diseases	Rate	1990	1804.71	2761.55	968.256
586	Incidence	Central Sub-Saharan Africa	Both	20-24 years	Periodontal diseases	Rate	2021	583.396	1087.52	257.577
587	Incidence	Southern Sub-Saharan Africa	Both	20-24 years	Periodontal diseases	Rate	1990	347.926	587.515	168.557
588	Incidence	Southern Sub-Saharan Africa	Both	20-24 years	Periodontal diseases	Rate	2021	270.554	428.628	161.545
