# Supplementary material for: Global, Regional, and National Levels and Trends in Burden of Dental Caries and Periodontal Disease from 1990 to 2035：Result From the Global Burden of Disease Study 2021
Source: Research Square preprint supplement (doi:10.21203/rs.3.rs-5609270/v1), 2025-04-02
Supplement: Supplementary file 8 [file 29c34712ba39d8df3e28e43d.xlsx]

## Sheet: Sheet1
Exported data
	measure_name	location_name	sex_name	age_name	cause_name	metric_name	year	val	upper	lower
1	Incidence	Southeast Asia	Both	20-24 years	Caries of permanent teeth	Rate	1990	55749.9	65875.6	44115.9
2	Incidence	Southeast Asia	Both	20-24 years	Caries of permanent teeth	Rate	2021	57159.3	66440.4	46406
3	Incidence	Global	Both	20-24 years	Caries of permanent teeth	Rate	1990	49069.6	58907.2	39113.5
4	Incidence	Global	Both	20-24 years	Caries of permanent teeth	Rate	2021	54326	63552	44192.9
5	Incidence	Oceania	Both	20-24 years	Caries of permanent teeth	Rate	1990	43187.6	58071.1	30574.3
6	Incidence	East Asia	Both	20-24 years	Caries of permanent teeth	Rate	1990	36176.2	49047.6	26741.1
7	Incidence	Oceania	Both	20-24 years	Caries of permanent teeth	Rate	2021	43426.6	58412.9	29645.2
8	Incidence	East Asia	Both	20-24 years	Caries of permanent teeth	Rate	2021	50509.3	61836.8	39939.5
9	Incidence	Central Asia	Both	20-24 years	Caries of permanent teeth	Rate	1990	48213.5	61992	35560.2
10	Incidence	Central Asia	Both	20-24 years	Caries of permanent teeth	Rate	2021	49579.8	62529.1	36973.4
11	Incidence	Central Europe	Both	20-24 years	Caries of permanent teeth	Rate	1990	44519.8	56177.4	33574.1
12	Incidence	Central Europe	Both	20-24 years	Caries of permanent teeth	Rate	2021	48375.4	59325.2	37198.8
13	Incidence	Western Europe	Both	20-24 years	Caries of permanent teeth	Rate	1990	53744.1	62813.3	43561.4
14	Incidence	Eastern Europe	Both	20-24 years	Caries of permanent teeth	Rate	1990	55176.7	65097.4	44224.7
15	Incidence	Australasia	Both	20-24 years	Caries of permanent teeth	Rate	1990	49936	60855.3	39279.3
16	Incidence	Eastern Europe	Both	20-24 years	Caries of permanent teeth	Rate	2021	56122.6	65609.3	45317
17	Incidence	Western Europe	Both	20-24 years	Caries of permanent teeth	Rate	2021	55561	63227.5	46507.4
18	Incidence	High-income Asia Pacific	Both	20-24 years	Caries of permanent teeth	Rate	1990	59268.4	66714.8	50995.1
19	Incidence	Australasia	Both	20-24 years	Caries of permanent teeth	Rate	2021	56164.7	67216.8	44827.1
20	Incidence	High-income Asia Pacific	Both	20-24 years	Caries of permanent teeth	Rate	2021	56658.1	64147.3	47831.7
21	Incidence	High-income North America	Both	20-24 years	Caries of permanent teeth	Rate	1990	59529.1	67966.1	50380
22	Incidence	High-income North America	Both	20-24 years	Caries of permanent teeth	Rate	2021	59609.5	67443.2	50615.8
23	Incidence	Caribbean	Both	20-24 years	Caries of permanent teeth	Rate	1990	48345.9	60454.1	36731.2
24	Incidence	Southern Latin America	Both	20-24 years	Caries of permanent teeth	Rate	1990	50813.1	63367.9	37348.6
25	Incidence	Tropical Latin America	Both	20-24 years	Caries of permanent teeth	Rate	1990	55689.1	66152	43642.2
26	Incidence	Caribbean	Both	20-24 years	Caries of permanent teeth	Rate	2021	50847.2	60140.4	41173.5
27	Incidence	Tropical Latin America	Both	20-24 years	Caries of permanent teeth	Rate	2021	57209.4	67113.9	45353.9
28	Incidence	Southern Latin America	Both	20-24 years	Caries of permanent teeth	Rate	2021	50939	60952	41535.3
29	Incidence	Central Latin America	Both	20-24 years	Caries of permanent teeth	Rate	1990	54229.3	64541.2	43092.7
30	Incidence	South Asia	Both	20-24 years	Caries of permanent teeth	Rate	1990	54651.5	64835.4	44078.7
31	Incidence	North Africa and Middle East	Both	20-24 years	Caries of permanent teeth	Rate	1990	50668.6	62071.8	39288.8
32	Incidence	South Asia	Both	20-24 years	Caries of permanent teeth	Rate	2021	56013.7	65183.2	45921.6
33	Incidence	Central Latin America	Both	20-24 years	Caries of permanent teeth	Rate	2021	55429.6	64938.6	45306.1
34	Incidence	North Africa and Middle East	Both	20-24 years	Caries of permanent teeth	Rate	2021	51701.6	62938	39976.5
35	Incidence	Central Sub-Saharan Africa	Both	20-24 years	Caries of permanent teeth	Rate	1990	51184.2	63513.3	38740
36	Incidence	Eastern Sub-Saharan Africa	Both	20-24 years	Caries of permanent teeth	Rate	1990	49895.9	59362.6	40523.3
37	Incidence	Southern Sub-Saharan Africa	Both	20-24 years	Caries of permanent teeth	Rate	1990	54135.4	63971.5	44096.6
38	Incidence	Central Sub-Saharan Africa	Both	20-24 years	Caries of permanent teeth	Rate	2021	50870.3	63837.7	38468.2
39	Incidence	Western Sub-Saharan Africa	Both	20-24 years	Caries of permanent teeth	Rate	1990	54119.6	62881.9	44330.4
40	Incidence	Eastern Sub-Saharan Africa	Both	20-24 years	Caries of permanent teeth	Rate	2021	51864.7	61285.4	42184.7
41	Incidence	Southern Sub-Saharan Africa	Both	20-24 years	Caries of permanent teeth	Rate	2021	54235.4	64154.1	44219.5
42	Incidence	Western Sub-Saharan Africa	Both	20-24 years	Caries of permanent teeth	Rate	2021	54395	62602.5	45062.5
43	Incidence	Central Latin America	Both	5-9 years	Caries of permanent teeth	Rate	1990	16775	31400.5	6870.23
44	Incidence	Central Latin America	Both	5-9 years	Caries of permanent teeth	Rate	2021	15935.2	30490.2	6461.96
45	Incidence	Central Latin America	Both	10-14 years	Caries of permanent teeth	Rate	1990	37442.3	52726.7	23912.2
46	Incidence	Central Latin America	Both	10-14 years	Caries of permanent teeth	Rate	2021	33955.2	48751.6	21221.2
47	Incidence	Central Latin America	Both	15-19 years	Caries of permanent teeth	Rate	1990	47158.3	59117	35188.1
48	Incidence	Central Latin America	Both	15-19 years	Caries of permanent teeth	Rate	2021	46413	58321.9	34443.8
49	Incidence	Central Latin America	Both	25-29 years	Caries of permanent teeth	Rate	1990	47820	59968.8	34381.9
50	Incidence	Central Latin America	Both	25-29 years	Caries of permanent teeth	Rate	2021	48620.6	60241.7	35997.5
51	Incidence	Central Latin America	Both	30-34 years	Caries of permanent teeth	Rate	1990	41699.6	51802.2	31238
52	Incidence	Central Latin America	Both	30-34 years	Caries of permanent teeth	Rate	2021	42382.2	51675.5	32155.1
53	Incidence	Central Latin America	Both	35-39 years	Caries of permanent teeth	Rate	1990	36921.8	46416	27019.4
54	Incidence	Central Latin America	Both	35-39 years	Caries of permanent teeth	Rate	2021	37568.8	47240	27747.7
55	Incidence	Central Latin America	Both	40-44 years	Caries of permanent teeth	Rate	1990	32995.7	43397.5	24541
56	Incidence	Central Latin America	Both	40-44 years	Caries of permanent teeth	Rate	2021	33625.6	43755.1	24949.9
57	Incidence	Central Latin America	Both	45-49 years	Caries of permanent teeth	Rate	1990	29629.8	39067.1	22302.7
58	Incidence	Southern Latin America	Both	5-9 years	Caries of permanent teeth	Rate	1990	29424.1	46404.7	13534.5
59	Incidence	Southern Latin America	Both	5-9 years	Caries of permanent teeth	Rate	2021	28594.4	45092.1	13122.3
60	Incidence	Southern Latin America	Both	10-14 years	Caries of permanent teeth	Rate	1990	40460.7	52551.4	27466.1
61	Incidence	Southern Latin America	Both	10-14 years	Caries of permanent teeth	Rate	2021	41065.3	53511.8	28390.5
62	Incidence	Southern Latin America	Both	15-19 years	Caries of permanent teeth	Rate	1990	44688.2	57077.3	32706.9
63	Incidence	Southern Latin America	Both	15-19 years	Caries of permanent teeth	Rate	2021	45449.9	56966.5	34182.5
64	Incidence	Southern Latin America	Both	25-29 years	Caries of permanent teeth	Rate	1990	42096.8	58123.4	26189.3
65	Incidence	Southern Latin America	Both	25-29 years	Caries of permanent teeth	Rate	2021	41635.4	53548	30561.6
66	Incidence	Southern Latin America	Both	30-34 years	Caries of permanent teeth	Rate	1990	36227.3	48986.4	23694.1
67	Incidence	Southern Latin America	Both	30-34 years	Caries of permanent teeth	Rate	2021	35747.4	45197.7	26489.5
68	Incidence	Southern Latin America	Both	35-39 years	Caries of permanent teeth	Rate	1990	32563.8	45388	21628.4
69	Incidence	Southern Latin America	Both	35-39 years	Caries of permanent teeth	Rate	2021	32509.3	42583.6	23954.6
70	Incidence	Southern Latin America	Both	40-44 years	Caries of permanent teeth	Rate	1990	30006.1	42668.7	20703.4
71	Incidence	Southern Latin America	Both	40-44 years	Caries of permanent teeth	Rate	2021	30378.9	40750	22367.7
72	Incidence	Southern Latin America	Both	45-49 years	Caries of permanent teeth	Rate	1990	27677.6	39830.4	19597.1
73	Incidence	Global	Both	5-9 years	Caries of permanent teeth	Rate	1990	17971.2	31062.4	8911.96
74	Incidence	Global	Both	5-9 years	Caries of permanent teeth	Rate	2021	16214.1	28720.9	8100.48
75	Incidence	Global	Both	10-14 years	Caries of permanent teeth	Rate	1990	33461.1	45337.1	22886.6
76	Incidence	Global	Both	10-14 years	Caries of permanent teeth	Rate	2021	35249.4	47938.4	24001.2
77	Incidence	Global	Both	15-19 years	Caries of permanent teeth	Rate	1990	40105.9	49554	31042.2
78	Incidence	Global	Both	15-19 years	Caries of permanent teeth	Rate	2021	46221.2	56734.7	36336.8
79	Incidence	Global	Both	25-29 years	Caries of permanent teeth	Rate	1990	44590.6	55963.2	33277.3
80	Incidence	Global	Both	25-29 years	Caries of permanent teeth	Rate	2021	48664.4	59306.9	37423.8
81	Incidence	Global	Both	30-34 years	Caries of permanent teeth	Rate	1990	39298.9	47622.1	30031.4
82	Incidence	Global	Both	30-34 years	Caries of permanent teeth	Rate	2021	41834	49912.9	32452.8
83	Incidence	Global	Both	35-39 years	Caries of permanent teeth	Rate	1990	34152	41990.8	26021.6
84	Incidence	Global	Both	35-39 years	Caries of permanent teeth	Rate	2021	36770.8	44571.3	28439.4
85	Incidence	Global	Both	40-44 years	Caries of permanent teeth	Rate	1990	30662.7	39049.9	23396.8
86	Incidence	Global	Both	40-44 years	Caries of permanent teeth	Rate	2021	32595	41306.3	25062.2
87	Incidence	Global	Both	45-49 years	Caries of permanent teeth	Rate	1990	27406.2	34662.9	21500.8
88	Incidence	Southeast Asia	Both	45-49 years	Caries of permanent teeth	Rate	2021	36009.6	44854.6	28340.3
89	Incidence	Southeast Asia	Both	50-54 years	Caries of permanent teeth	Rate	1990	32332	43082.3	24012.8
90	Incidence	Southeast Asia	Both	50-54 years	Caries of permanent teeth	Rate	2021	32427.8	42071.7	24400.7
91	Incidence	Southeast Asia	Both	55-59 years	Caries of permanent teeth	Rate	1990	28738.4	37428.3	21156.2
92	Incidence	Southeast Asia	Both	55-59 years	Caries of permanent teeth	Rate	2021	28697.5	37077.3	21545
93	Incidence	Southeast Asia	Both	60-64 years	Caries of permanent teeth	Rate	1990	25765.7	33097.8	18996.8
94	Incidence	Southeast Asia	Both	60-64 years	Caries of permanent teeth	Rate	2021	25664.6	32798.2	19292
95	Incidence	Southeast Asia	Both	65-69 years	Caries of permanent teeth	Rate	1990	23900.3	31150.4	18426
96	Incidence	Southeast Asia	Both	65-69 years	Caries of permanent teeth	Rate	2021	23696.5	30320.4	18234.7
97	Incidence	Southeast Asia	Both	70+ years	Caries of permanent teeth	Rate	1990	20802	26758.4	16031.5
98	Incidence	Southeast Asia	Both	70+ years	Caries of permanent teeth	Rate	2021	20349.9	26015.3	15859.8
99	Incidence	Oceania	Both	45-49 years	Caries of permanent teeth	Rate	2021	25839.9	35199.3	18427
100	Incidence	Oceania	Both	50-54 years	Caries of permanent teeth	Rate	1990	23501.4	32683.4	16287.3
101	Incidence	East Asia	Both	45-49 years	Caries of permanent teeth	Rate	2021	20150.1	26495.5	15290.2
102	Incidence	East Asia	Both	50-54 years	Caries of permanent teeth	Rate	1990	14387.4	18914.9	11041.4
103	Incidence	East Asia	Both	50-54 years	Caries of permanent teeth	Rate	2021	16681.9	22301.6	12539
104	Incidence	East Asia	Both	55-59 years	Caries of permanent teeth	Rate	1990	12219.9	15869.8	9257.92
105	Incidence	East Asia	Both	55-59 years	Caries of permanent teeth	Rate	2021	13623.6	17741.3	10021.7
106	Incidence	East Asia	Both	60-64 years	Caries of permanent teeth	Rate	1990	10590.5	13760.7	8053.9
107	Incidence	East Asia	Both	60-64 years	Caries of permanent teeth	Rate	2021	11463.6	15028.3	8473.53
108	Incidence	East Asia	Both	65-69 years	Caries of permanent teeth	Rate	1990	9569.12	12623.8	7354.39
109	Incidence	East Asia	Both	65-69 years	Caries of permanent teeth	Rate	2021	10086	13536.9	7775.73
110	Incidence	East Asia	Both	70+ years	Caries of permanent teeth	Rate	1990	8058.78	10570.5	6414.84
111	Incidence	East Asia	Both	70+ years	Caries of permanent teeth	Rate	2021	7936.26	10566.8	6215
112	Incidence	Oceania	Both	50-54 years	Caries of permanent teeth	Rate	2021	23350.2	33304.1	16499.1
113	Incidence	Oceania	Both	55-59 years	Caries of permanent teeth	Rate	1990	20770.1	28295.1	14981.2
114	Incidence	Oceania	Both	55-59 years	Caries of permanent teeth	Rate	2021	20623.6	27820.2	15007.4
115	Incidence	Oceania	Both	60-64 years	Caries of permanent teeth	Rate	1990	18515.4	25043.1	13571
116	Incidence	Oceania	Both	60-64 years	Caries of permanent teeth	Rate	2021	18307.5	24293.7	13607.6
117	Incidence	Oceania	Both	65-69 years	Caries of permanent teeth	Rate	1990	17118.7	22898.6	13090
118	Incidence	Oceania	Both	65-69 years	Caries of permanent teeth	Rate	2021	16853.6	22328.3	13042
119	Incidence	Oceania	Both	70+ years	Caries of permanent teeth	Rate	1990	15131.6	19662.8	11447.1
120	Incidence	Oceania	Both	70+ years	Caries of permanent teeth	Rate	2021	14720.2	19042.3	11365.2
121	Incidence	Global	Both	45-49 years	Caries of permanent teeth	Rate	2021	28326.6	35818.9	22501.5
122	Incidence	Global	Both	50-54 years	Caries of permanent teeth	Rate	1990	24259.3	31420.8	18438.6
123	Incidence	Global	Both	50-54 years	Caries of permanent teeth	Rate	2021	24367.8	31142	18811
124	Incidence	Global	Both	55-59 years	Caries of permanent teeth	Rate	1990	21127	27161.5	16114.4
125	Incidence	Global	Both	55-59 years	Caries of permanent teeth	Rate	2021	20991.8	26917.1	15962.4
126	Incidence	Global	Both	60-64 years	Caries of permanent teeth	Rate	1990	18986.7	24285.9	14576.4
127	Incidence	Global	Both	60-64 years	Caries of permanent teeth	Rate	2021	18996.6	24250.3	14721.3
128	Incidence	Global	Both	65-69 years	Caries of permanent teeth	Rate	1990	17322.8	22337.4	13790.5
129	Incidence	Global	Both	65-69 years	Caries of permanent teeth	Rate	2021	16825.4	21600.4	13416.3
130	Incidence	Global	Both	70+ years	Caries of permanent teeth	Rate	1990	15101.8	19343.9	12007.6
131	Incidence	Global	Both	70+ years	Caries of permanent teeth	Rate	2021	14138.4	17989.6	11366.7
132	Incidence	Central Asia	Both	45-49 years	Caries of permanent teeth	Rate	2021	31123.4	41282.9	22291.2
133	Incidence	Central Asia	Both	50-54 years	Caries of permanent teeth	Rate	1990	28675.4	39196	20038.5
134	Incidence	Central Asia	Both	50-54 years	Caries of permanent teeth	Rate	2021	28740.6	39564.7	20057.5
135	Incidence	Central Asia	Both	55-59 years	Caries of permanent teeth	Rate	1990	26455.5	35278.2	18889
136	Incidence	Central Asia	Both	55-59 years	Caries of permanent teeth	Rate	2021	26495.4	35502.9	19017.7
137	Incidence	Central Asia	Both	60-64 years	Caries of permanent teeth	Rate	1990	24715.9	32306.2	18248.5
138	Incidence	Central Asia	Both	60-64 years	Caries of permanent teeth	Rate	2021	24747.3	32437.3	17879.6
139	Incidence	Central Asia	Both	65-69 years	Caries of permanent teeth	Rate	1990	23796.4	31562.4	17628
140	Incidence	Central Asia	Both	65-69 years	Caries of permanent teeth	Rate	2021	23778.2	31884.9	17357
141	Incidence	Central Asia	Both	70+ years	Caries of permanent teeth	Rate	1990	22081.6	28822.4	16843.3
142	Incidence	Central Asia	Both	70+ years	Caries of permanent teeth	Rate	2021	22028.2	28973.4	16803.4
143	Incidence	Eastern Europe	Both	45-49 years	Caries of permanent teeth	Rate	2021	32869.4	41735.1	25557.8
144	Incidence	Eastern Europe	Both	50-54 years	Caries of permanent teeth	Rate	1990	30259.6	39682.4	22318.4
145	Incidence	Eastern Europe	Both	50-54 years	Caries of permanent teeth	Rate	2021	29938.7	39464	22467.9
146	Incidence	Eastern Europe	Both	55-59 years	Caries of permanent teeth	Rate	1990	27420.9	35789.2	20246.6
147	Incidence	Eastern Europe	Both	55-59 years	Caries of permanent teeth	Rate	2021	27102.1	35040.1	20099.9
148	Incidence	Eastern Europe	Both	60-64 years	Caries of permanent teeth	Rate	1990	25228.8	33590.5	18792.4
149	Incidence	Eastern Europe	Both	60-64 years	Caries of permanent teeth	Rate	2021	24845.5	32256	18484.5
150	Incidence	Eastern Europe	Both	65-69 years	Caries of permanent teeth	Rate	1990	23816.8	31749.9	18143.5
151	Incidence	Eastern Europe	Both	65-69 years	Caries of permanent teeth	Rate	2021	23372.7	30331.8	17989.5
152	Incidence	Eastern Europe	Both	70+ years	Caries of permanent teeth	Rate	1990	21036.6	27660.8	16274.3
153	Incidence	Eastern Europe	Both	70+ years	Caries of permanent teeth	Rate	2021	20367	26386	16083.3
154	Incidence	High-income Asia Pacific	Both	45-49 years	Caries of permanent teeth	Rate	2021	25589	30689.6	20645.8
155	Incidence	High-income Asia Pacific	Both	50-54 years	Caries of permanent teeth	Rate	1990	25457.9	31957.1	19905.9
156	Incidence	High-income Asia Pacific	Both	50-54 years	Caries of permanent teeth	Rate	2021	22386.6	27817.6	17744.1
157	Incidence	High-income Asia Pacific	Both	55-59 years	Caries of permanent teeth	Rate	1990	21505.7	27266.8	16225.9
158	Incidence	High-income Asia Pacific	Both	55-59 years	Caries of permanent teeth	Rate	2021	19640.3	24953.3	14848.7
159	Incidence	High-income Asia Pacific	Both	60-64 years	Caries of permanent teeth	Rate	1990	18581.3	24220.8	13648.6
160	Incidence	High-income Asia Pacific	Both	60-64 years	Caries of permanent teeth	Rate	2021	17547.2	22267.7	13149.9
161	Incidence	High-income Asia Pacific	Both	65-69 years	Caries of permanent teeth	Rate	1990	16825.5	22314.6	12697.5
162	Incidence	High-income Asia Pacific	Both	65-69 years	Caries of permanent teeth	Rate	2021	14999.7	19299.7	11552.2
163	Incidence	High-income Asia Pacific	Both	70+ years	Caries of permanent teeth	Rate	1990	13274.9	17454.1	10308.7
164	Incidence	High-income Asia Pacific	Both	70+ years	Caries of permanent teeth	Rate	2021	10598.2	13516.8	8414.29
165	Incidence	Australasia	Both	45-49 years	Caries of permanent teeth	Rate	2021	29699.6	39323.3	21464.5
166	Incidence	Australasia	Both	50-54 years	Caries of permanent teeth	Rate	1990	25783.7	34900.5	18374.4
167	Incidence	Central Europe	Both	45-49 years	Caries of permanent teeth	Rate	2021	31595	40225.9	24084.9
168	Incidence	Central Europe	Both	50-54 years	Caries of permanent teeth	Rate	1990	28323.4	38101.5	20795.1
169	Incidence	Australasia	Both	50-54 years	Caries of permanent teeth	Rate	2021	25994.6	35042.9	18722.9
170	Incidence	Australasia	Both	55-59 years	Caries of permanent teeth	Rate	1990	22424.2	31062.4	16106.7
171	Incidence	Australasia	Both	55-59 years	Caries of permanent teeth	Rate	2021	22549	30483.3	16177
172	Incidence	Australasia	Both	60-64 years	Caries of permanent teeth	Rate	1990	19921.3	27382.2	14339.5
173	Incidence	Australasia	Both	60-64 years	Caries of permanent teeth	Rate	2021	19886.7	27080	14212.2
174	Incidence	Australasia	Both	65-69 years	Caries of permanent teeth	Rate	1990	18219.6	25465.7	13387.4
175	Incidence	Australasia	Both	65-69 years	Caries of permanent teeth	Rate	2021	18072.9	25032	13272.8
176	Incidence	Australasia	Both	70+ years	Caries of permanent teeth	Rate	1990	14926.5	20285.9	11068.3
177	Incidence	Australasia	Both	70+ years	Caries of permanent teeth	Rate	2021	14537.1	19258.9	11035.9
178	Incidence	Central Europe	Both	50-54 years	Caries of permanent teeth	Rate	2021	29229.7	38816	21621.7
179	Incidence	Central Europe	Both	55-59 years	Caries of permanent teeth	Rate	1990	26187.3	33580	19306.8
180	Incidence	Central Europe	Both	55-59 years	Caries of permanent teeth	Rate	2021	26662.3	34164.6	19868.3
181	Incidence	Central Europe	Both	60-64 years	Caries of permanent teeth	Rate	1990	24800.4	31596.2	18872.1
182	Incidence	Central Europe	Both	60-64 years	Caries of permanent teeth	Rate	2021	25025.3	31917.8	19225.9
183	Incidence	Central Europe	Both	65-69 years	Caries of permanent teeth	Rate	1990	24440.9	31536.7	18556.8
184	Incidence	Central Europe	Both	65-69 years	Caries of permanent teeth	Rate	2021	24447.1	31598.5	18698.1
185	Incidence	Central Europe	Both	70+ years	Caries of permanent teeth	Rate	1990	23278.1	29524.7	18344.5
186	Incidence	Central Europe	Both	70+ years	Caries of permanent teeth	Rate	2021	22776.6	28965.6	18176.5
187	Incidence	Western Europe	Both	45-49 years	Caries of permanent teeth	Rate	2021	26142.2	33270.5	20385.9
188	Incidence	Western Europe	Both	50-54 years	Caries of permanent teeth	Rate	1990	22773.3	30692.7	17081.8
189	Incidence	Western Europe	Both	50-54 years	Caries of permanent teeth	Rate	2021	22298.3	29112.1	17224.5
190	Incidence	Western Europe	Both	55-59 years	Caries of permanent teeth	Rate	1990	20248.1	26166.5	15645.6
191	Incidence	Western Europe	Both	55-59 years	Caries of permanent teeth	Rate	2021	19276.1	24084.5	15061.2
192	Incidence	Western Europe	Both	60-64 years	Caries of permanent teeth	Rate	1990	18328	23215.7	14442.5
193	Incidence	Western Europe	Both	60-64 years	Caries of permanent teeth	Rate	2021	17475.8	21806.7	13999.5
194	Incidence	Western Europe	Both	65-69 years	Caries of permanent teeth	Rate	1990	17101.6	21777.7	13768.9
195	Incidence	Western Europe	Both	65-69 years	Caries of permanent teeth	Rate	2021	16511.2	20967.9	13459.3
196	Incidence	Western Europe	Both	70+ years	Caries of permanent teeth	Rate	1990	15170.3	18692.8	12224.9
197	Incidence	Western Europe	Both	70+ years	Caries of permanent teeth	Rate	2021	14606.6	17825.5	12025.2
198	Incidence	Southeast Asia	Both	5-9 years	Caries of permanent teeth	Rate	1990	23648	39952.5	10515.3
199	Incidence	Southeast Asia	Both	5-9 years	Caries of permanent teeth	Rate	2021	22504.9	38775.4	10102.1
200	Incidence	Southeast Asia	Both	10-14 years	Caries of permanent teeth	Rate	1990	40293.9	53823.6	27431.7
201	Incidence	Southeast Asia	Both	10-14 years	Caries of permanent teeth	Rate	2021	40548.7	54697.2	27317.1
202	Incidence	Southeast Asia	Both	15-19 years	Caries of permanent teeth	Rate	1990	47018.6	58588.8	35674.2
203	Incidence	Southeast Asia	Both	15-19 years	Caries of permanent teeth	Rate	2021	48355.7	59941.7	37222.5
204	Incidence	East Asia	Both	5-9 years	Caries of permanent teeth	Rate	1990	12976.2	27379.8	5325.95
205	Incidence	East Asia	Both	5-9 years	Caries of permanent teeth	Rate	2021	8716.26	18857.5	4035.28
206	Incidence	East Asia	Both	10-14 years	Caries of permanent teeth	Rate	1990	16435.4	25364.3	10175.1
207	Incidence	East Asia	Both	10-14 years	Caries of permanent teeth	Rate	2021	24827.2	39639.4	15099.1
208	Incidence	East Asia	Both	15-19 years	Caries of permanent teeth	Rate	1990	21716	30588.5	14915
209	Incidence	East Asia	Both	15-19 years	Caries of permanent teeth	Rate	2021	41774.5	54086.3	30433
210	Incidence	Oceania	Both	5-9 years	Caries of permanent teeth	Rate	1990	30045.8	44214.8	14115.7
211	Incidence	Oceania	Both	5-9 years	Caries of permanent teeth	Rate	2021	30112.4	45473.9	14235.6
212	Incidence	Oceania	Both	10-14 years	Caries of permanent teeth	Rate	1990	34442.7	46787.6	22090.9
213	Incidence	Oceania	Both	10-14 years	Caries of permanent teeth	Rate	2021	34854.8	48289.5	22915
214	Incidence	Oceania	Both	15-19 years	Caries of permanent teeth	Rate	1990	38424.8	50632.3	27322.2
215	Incidence	Oceania	Both	15-19 years	Caries of permanent teeth	Rate	2021	38663.3	50810.2	27828.9
216	Incidence	Western Europe	Both	5-9 years	Caries of permanent teeth	Rate	1990	26290.5	34180.7	19618.1
217	Incidence	Western Europe	Both	5-9 years	Caries of permanent teeth	Rate	2021	21836.8	33723.3	12623.4
218	Incidence	Western Europe	Both	10-14 years	Caries of permanent teeth	Rate	1990	40548.8	49771	32210.8
219	Incidence	Western Europe	Both	10-14 years	Caries of permanent teeth	Rate	2021	43085.9	54464.7	32277.4
220	Incidence	Western Europe	Both	15-19 years	Caries of permanent teeth	Rate	1990	46730.9	56029	37929
221	Incidence	Western Europe	Both	15-19 years	Caries of permanent teeth	Rate	2021	50143.5	60184.6	41209.5
222	Incidence	Western Europe	Both	25-29 years	Caries of permanent teeth	Rate	1990	46142.4	57150.7	33519.9
223	Incidence	Western Europe	Both	25-29 years	Caries of permanent teeth	Rate	2021	47369.6	56633.3	37035
224	Incidence	Western Europe	Both	30-34 years	Caries of permanent teeth	Rate	1990	39180.7	48584.5	28797.6
225	Incidence	Western Europe	Both	30-34 years	Caries of permanent teeth	Rate	2021	39317.4	47237.3	30442.9
226	Incidence	Western Europe	Both	35-39 years	Caries of permanent teeth	Rate	1990	34236.7	43107.8	25238.6
227	Incidence	Western Europe	Both	35-39 years	Caries of permanent teeth	Rate	2021	34123.2	42114.6	26015
228	Incidence	Western Europe	Both	40-44 years	Caries of permanent teeth	Rate	1990	30219.6	39294.9	22547.3
229	Incidence	Western Europe	Both	40-44 years	Caries of permanent teeth	Rate	2021	29996.5	38244.5	22641.9
230	Incidence	Western Europe	Both	45-49 years	Caries of permanent teeth	Rate	1990	26221.1	34120.3	20132.1
231	Incidence	High-income North America	Both	45-49 years	Caries of permanent teeth	Rate	2021	30594.2	39040.5	23478.9
232	Incidence	High-income North America	Both	50-54 years	Caries of permanent teeth	Rate	1990	26633	35119.8	20009.8
233	Incidence	High-income North America	Both	50-54 years	Caries of permanent teeth	Rate	2021	26248	34059.1	20066
234	Incidence	High-income North America	Both	55-59 years	Caries of permanent teeth	Rate	1990	22549.8	30010.4	16141.6
235	Incidence	High-income North America	Both	55-59 years	Caries of permanent teeth	Rate	2021	22283	29194.7	16081.9
236	Incidence	High-income North America	Both	60-64 years	Caries of permanent teeth	Rate	1990	19429.1	26466.3	13827.6
237	Incidence	High-income North America	Both	60-64 years	Caries of permanent teeth	Rate	2021	19319.4	25642.1	14291.1
238	Incidence	High-income North America	Both	65-69 years	Caries of permanent teeth	Rate	1990	17239.2	23554.1	12592.5
239	Incidence	High-income North America	Both	65-69 years	Caries of permanent teeth	Rate	2021	17245.3	23193.5	13128.3
240	Incidence	High-income North America	Both	70+ years	Caries of permanent teeth	Rate	1990	13528.4	18055.2	10376.2
241	Incidence	High-income North America	Both	70+ years	Caries of permanent teeth	Rate	2021	13615.5	17925.5	10688.2
242	Incidence	Southern Latin America	Both	45-49 years	Caries of permanent teeth	Rate	2021	27640.4	36541.1	21176.5
243	Incidence	Southern Latin America	Both	50-54 years	Caries of permanent teeth	Rate	1990	25612.5	36716.6	17592.3
244	Incidence	Central Latin America	Both	45-49 years	Caries of permanent teeth	Rate	2021	30136.5	38872.4	22802.6
245	Incidence	Central Latin America	Both	50-54 years	Caries of permanent teeth	Rate	1990	26590.3	35478.7	19448
246	Incidence	High-income Asia Pacific	Both	5-9 years	Caries of permanent teeth	Rate	1990	12215.1	24968.7	5106.83
247	Incidence	High-income Asia Pacific	Both	5-9 years	Caries of permanent teeth	Rate	2021	10457.4	20813.3	4934.3
248	Incidence	High-income Asia Pacific	Both	10-14 years	Caries of permanent teeth	Rate	1990	38207	54862.6	24420
249	Incidence	High-income Asia Pacific	Both	10-14 years	Caries of permanent teeth	Rate	2021	32932.5	47385.3	21072.7
250	Incidence	High-income Asia Pacific	Both	15-19 years	Caries of permanent teeth	Rate	1990	52972.2	63379.7	41939.1
251	Incidence	High-income Asia Pacific	Both	15-19 years	Caries of permanent teeth	Rate	2021	50300.7	60139.3	39037.8
252	Incidence	North Africa and Middle East	Both	45-49 years	Caries of permanent teeth	Rate	2021	31431.2	40472.7	24137.3
253	Incidence	North Africa and Middle East	Both	50-54 years	Caries of permanent teeth	Rate	1990	28959.2	38572.6	21415.2
254	Incidence	North Africa and Middle East	Both	50-54 years	Caries of permanent teeth	Rate	2021	29112.7	38416.5	21910.4
255	Incidence	North Africa and Middle East	Both	55-59 years	Caries of permanent teeth	Rate	1990	25961	33680.3	19466.5
256	Incidence	North Africa and Middle East	Both	55-59 years	Caries of permanent teeth	Rate	2021	25931.9	33498.7	19346.6
257	Incidence	North Africa and Middle East	Both	60-64 years	Caries of permanent teeth	Rate	1990	22955.6	29278.5	17382
258	Incidence	North Africa and Middle East	Both	60-64 years	Caries of permanent teeth	Rate	2021	22811.8	28927.3	17259.4
259	Incidence	North Africa and Middle East	Both	65-69 years	Caries of permanent teeth	Rate	1990	20720	26536.5	16462
260	Incidence	North Africa and Middle East	Both	65-69 years	Caries of permanent teeth	Rate	2021	20609.4	26569.2	16334.7
261	Incidence	North Africa and Middle East	Both	70+ years	Caries of permanent teeth	Rate	1990	17902.9	22801.9	14114.4
262	Incidence	North Africa and Middle East	Both	70+ years	Caries of permanent teeth	Rate	2021	17700.8	22481.1	13982.2
263	Incidence	Caribbean	Both	45-49 years	Caries of permanent teeth	Rate	2021	30772	39601.4	23874.9
264	Incidence	Caribbean	Both	50-54 years	Caries of permanent teeth	Rate	1990	29683.7	40457.6	21288.9
265	Incidence	Caribbean	Both	50-54 years	Caries of permanent teeth	Rate	2021	28692.2	37368.2	21353.4
266	Incidence	Caribbean	Both	55-59 years	Caries of permanent teeth	Rate	1990	28523.5	37106.4	20456.3
267	Incidence	Caribbean	Both	55-59 years	Caries of permanent teeth	Rate	2021	27032.6	34472.4	20130.4
268	Incidence	Caribbean	Both	60-64 years	Caries of permanent teeth	Rate	1990	28120.5	35495.5	21232.7
269	Incidence	Caribbean	Both	60-64 years	Caries of permanent teeth	Rate	2021	26110.3	32691.8	20386.7
270	Incidence	Caribbean	Both	65-69 years	Caries of permanent teeth	Rate	1990	28104.8	36030.4	20933.8
271	Incidence	Caribbean	Both	65-69 years	Caries of permanent teeth	Rate	2021	26158.7	32669.9	19952.1
272	Incidence	Caribbean	Both	70+ years	Caries of permanent teeth	Rate	1990	25366	31687.7	19893.9
273	Incidence	Caribbean	Both	70+ years	Caries of permanent teeth	Rate	2021	23487.1	28931.4	18877.4
274	Incidence	Tropical Latin America	Both	45-49 years	Caries of permanent teeth	Rate	2021	38438.8	47989.9	29859.3
275	Incidence	Tropical Latin America	Both	50-54 years	Caries of permanent teeth	Rate	1990	33452.1	44249.3	24589.4
276	Incidence	Tropical Latin America	Both	50-54 years	Caries of permanent teeth	Rate	2021	35223.4	45689.4	25894.2
277	Incidence	Tropical Latin America	Both	55-59 years	Caries of permanent teeth	Rate	1990	30193.1	39046.6	22409.5
278	Incidence	Tropical Latin America	Both	55-59 years	Caries of permanent teeth	Rate	2021	31973	40931.8	23938.8
279	Incidence	Tropical Latin America	Both	60-64 years	Caries of permanent teeth	Rate	1990	27427	34989.3	20182
280	Incidence	Tropical Latin America	Both	60-64 years	Caries of permanent teeth	Rate	2021	29252.8	37220.9	21467.9
281	Incidence	Tropical Latin America	Both	65-69 years	Caries of permanent teeth	Rate	1990	25376	33275.9	19238.6
282	Incidence	Tropical Latin America	Both	65-69 years	Caries of permanent teeth	Rate	2021	27315.2	35614.7	20638.2
283	Incidence	Tropical Latin America	Both	70+ years	Caries of permanent teeth	Rate	1990	22278.5	28831	16997.5
284	Incidence	Tropical Latin America	Both	70+ years	Caries of permanent teeth	Rate	2021	24095.7	30550	19018.2
285	Incidence	Eastern Sub-Saharan Africa	Both	45-49 years	Caries of permanent teeth	Rate	2021	26517.3	33852.5	21049.4
286	Incidence	Eastern Sub-Saharan Africa	Both	50-54 years	Caries of permanent teeth	Rate	1990	24061.6	31259.9	18595.9
287	Incidence	Eastern Sub-Saharan Africa	Both	50-54 years	Caries of permanent teeth	Rate	2021	23752	30394.4	18209.8
288	Incidence	Eastern Sub-Saharan Africa	Both	55-59 years	Caries of permanent teeth	Rate	1990	21305.3	27052.3	16301.7
289	Incidence	Eastern Sub-Saharan Africa	Both	55-59 years	Caries of permanent teeth	Rate	2021	20872.6	26710.8	16039.8
290	Incidence	Eastern Sub-Saharan Africa	Both	60-64 years	Caries of permanent teeth	Rate	1990	18986.6	24174.3	14772.3
291	Incidence	Eastern Sub-Saharan Africa	Both	60-64 years	Caries of permanent teeth	Rate	2021	18522.2	23214.2	14366.1
292	Incidence	Eastern Sub-Saharan Africa	Both	65-69 years	Caries of permanent teeth	Rate	1990	17417.3	22252.4	13896.1
293	Incidence	Eastern Sub-Saharan Africa	Both	65-69 years	Caries of permanent teeth	Rate	2021	16838.6	21419.4	13449.7
294	Incidence	Eastern Sub-Saharan Africa	Both	70+ years	Caries of permanent teeth	Rate	1990	15086.4	19196.2	12010.6
295	Incidence	Eastern Sub-Saharan Africa	Both	70+ years	Caries of permanent teeth	Rate	2021	14054.9	17928.6	11286.8
296	Incidence	Central Sub-Saharan Africa	Both	45-49 years	Caries of permanent teeth	Rate	2021	27028.1	38231.3	19800.4
297	Incidence	Central Sub-Saharan Africa	Both	50-54 years	Caries of permanent teeth	Rate	1990	23970.6	33610.2	16912.5
298	Incidence	Central Sub-Saharan Africa	Both	50-54 years	Caries of permanent teeth	Rate	2021	24008.9	33336	16709.4
299	Incidence	Central Sub-Saharan Africa	Both	55-59 years	Caries of permanent teeth	Rate	1990	20866.7	28430.6	14814.9
300	Incidence	Central Sub-Saharan Africa	Both	55-59 years	Caries of permanent teeth	Rate	2021	20868.1	28567.2	15120
301	Incidence	Central Sub-Saharan Africa	Both	60-64 years	Caries of permanent teeth	Rate	1990	18290.9	24835.9	13124.4
302	Incidence	Central Sub-Saharan Africa	Both	60-64 years	Caries of permanent teeth	Rate	2021	18275.2	24824.5	13271.5
303	Incidence	Central Sub-Saharan Africa	Both	65-69 years	Caries of permanent teeth	Rate	1990	16516.9	22437.1	12179.7
304	Incidence	Central Sub-Saharan Africa	Both	65-69 years	Caries of permanent teeth	Rate	2021	16503.5	22364.8	12364.3
305	Incidence	Central Sub-Saharan Africa	Both	70+ years	Caries of permanent teeth	Rate	1990	14209.3	19343.1	10749.8
306	Incidence	Central Sub-Saharan Africa	Both	70+ years	Caries of permanent teeth	Rate	2021	13977.5	18856.7	10356
307	Incidence	Southern Latin America	Both	50-54 years	Caries of permanent teeth	Rate	2021	25269.3	32802.3	19252
308	Incidence	Southern Latin America	Both	55-59 years	Caries of permanent teeth	Rate	1990	23359.7	31950.9	16999.9
309	Incidence	Southern Latin America	Both	55-59 years	Caries of permanent teeth	Rate	2021	23337.7	29519.3	18337.3
310	Incidence	Southern Latin America	Both	60-64 years	Caries of permanent teeth	Rate	1990	21346.2	28398.7	15949.2
311	Incidence	Southern Latin America	Both	60-64 years	Caries of permanent teeth	Rate	2021	21375.5	27172.7	17089.9
312	Incidence	Southern Latin America	Both	65-69 years	Caries of permanent teeth	Rate	1990	19999	27287.8	15285.6
313	Incidence	Southern Latin America	Both	65-69 years	Caries of permanent teeth	Rate	2021	19853.1	25645.2	15858
314	Incidence	Southern Latin America	Both	70+ years	Caries of permanent teeth	Rate	1990	17850.3	23402.1	13717
315	Incidence	Southern Latin America	Both	70+ years	Caries of permanent teeth	Rate	2021	17557.6	21767.9	14268.1
316	Incidence	Southern Sub-Saharan Africa	Both	45-49 years	Caries of permanent teeth	Rate	2021	26271.2	34503.7	19804.9
317	Incidence	Southern Sub-Saharan Africa	Both	50-54 years	Caries of permanent teeth	Rate	1990	22569.9	30228.1	16717.5
318	Incidence	Southern Sub-Saharan Africa	Both	50-54 years	Caries of permanent teeth	Rate	2021	22741.5	30631.1	16941.7
319	Incidence	Southern Sub-Saharan Africa	Both	55-59 years	Caries of permanent teeth	Rate	1990	19258.4	25776	14033.3
320	Incidence	Southern Sub-Saharan Africa	Both	55-59 years	Caries of permanent teeth	Rate	2021	19234.8	25773.9	14185.4
321	Incidence	Southern Sub-Saharan Africa	Both	60-64 years	Caries of permanent teeth	Rate	1990	16479.6	21940.9	12121
322	Incidence	Southern Sub-Saharan Africa	Both	60-64 years	Caries of permanent teeth	Rate	2021	16451.6	21658.4	12050.7
323	Incidence	Southern Sub-Saharan Africa	Both	65-69 years	Caries of permanent teeth	Rate	1990	14573.1	19716.5	11004.7
324	Incidence	Southern Sub-Saharan Africa	Both	65-69 years	Caries of permanent teeth	Rate	2021	14496.2	19444.3	11024
325	Incidence	Southern Sub-Saharan Africa	Both	70+ years	Caries of permanent teeth	Rate	1990	11713.3	15553.5	9034.72
326	Incidence	Southern Sub-Saharan Africa	Both	70+ years	Caries of permanent teeth	Rate	2021	11610.7	15410.4	9110.93
327	Incidence	Central Latin America	Both	50-54 years	Caries of permanent teeth	Rate	2021	26872.8	35748.7	19865.5
328	Incidence	Central Latin America	Both	55-59 years	Caries of permanent teeth	Rate	1990	23748	31312.1	17580.1
329	Incidence	Central Latin America	Both	55-59 years	Caries of permanent teeth	Rate	2021	23967.8	31342.2	17483.9
330	Incidence	Central Latin America	Both	60-64 years	Caries of permanent teeth	Rate	1990	21618.4	27931.8	16234.8
331	Incidence	Central Latin America	Both	60-64 years	Caries of permanent teeth	Rate	2021	21831.4	28747.8	16481.1
332	Incidence	Central Latin America	Both	65-69 years	Caries of permanent teeth	Rate	1990	20135	26710	15199.8
333	Incidence	Central Latin America	Both	65-69 years	Caries of permanent teeth	Rate	2021	20451.5	26940.2	15621.5
334	Incidence	Central Latin America	Both	70+ years	Caries of permanent teeth	Rate	1990	17604.1	22924	13732.8
335	Incidence	Central Latin America	Both	70+ years	Caries of permanent teeth	Rate	2021	17455	22426.3	13607.5
336	Incidence	Western Sub-Saharan Africa	Both	45-49 years	Caries of permanent teeth	Rate	2021	26216.7	33172.4	20331.1
337	Incidence	Western Sub-Saharan Africa	Both	50-54 years	Caries of permanent teeth	Rate	1990	23650.8	30795.6	17920.3
338	Incidence	Western Sub-Saharan Africa	Both	50-54 years	Caries of permanent teeth	Rate	2021	22510.9	29271.3	17277.7
339	Incidence	Western Sub-Saharan Africa	Both	55-59 years	Caries of permanent teeth	Rate	1990	19953.4	26169.6	14728.7
340	Incidence	Western Sub-Saharan Africa	Both	55-59 years	Caries of permanent teeth	Rate	2021	18912.1	24331.7	14221.3
341	Incidence	Western Sub-Saharan Africa	Both	60-64 years	Caries of permanent teeth	Rate	1990	17048.5	22057.6	12815.8
342	Incidence	Western Sub-Saharan Africa	Both	60-64 years	Caries of permanent teeth	Rate	2021	16222.1	21054.5	12404.2
343	Incidence	Western Sub-Saharan Africa	Both	65-69 years	Caries of permanent teeth	Rate	1990	15047.3	19808.4	11816.1
344	Incidence	Western Sub-Saharan Africa	Both	65-69 years	Caries of permanent teeth	Rate	2021	14480.2	19028.8	11339.5
345	Incidence	Western Sub-Saharan Africa	Both	70+ years	Caries of permanent teeth	Rate	1990	12197.6	15984.8	9664.17
346	Incidence	Western Sub-Saharan Africa	Both	70+ years	Caries of permanent teeth	Rate	2021	11656	15204.1	9223.43
347	Incidence	South Asia	Both	45-49 years	Caries of permanent teeth	Rate	2021	31492.5	39776.4	24695.7
348	Incidence	South Asia	Both	50-54 years	Caries of permanent teeth	Rate	1990	27088.3	36143.5	20141.4
349	Incidence	South Asia	Both	50-54 years	Caries of permanent teeth	Rate	2021	27269.8	35123.7	20609.4
350	Incidence	South Asia	Both	55-59 years	Caries of permanent teeth	Rate	1990	23447.5	30257.5	17489.7
351	Incidence	South Asia	Both	55-59 years	Caries of permanent teeth	Rate	2021	23283.9	30093	17511.3
352	Incidence	South Asia	Both	60-64 years	Caries of permanent teeth	Rate	1990	20615.2	26723.4	15635.3
353	Incidence	South Asia	Both	60-64 years	Caries of permanent teeth	Rate	2021	20305.9	26181.1	15639.7
354	Incidence	South Asia	Both	65-69 years	Caries of permanent teeth	Rate	1990	18799.5	24243.7	15054.1
355	Incidence	South Asia	Both	65-69 years	Caries of permanent teeth	Rate	2021	18409.6	23628.7	14811.1
356	Incidence	South Asia	Both	70+ years	Caries of permanent teeth	Rate	1990	16104.9	20554.4	12839.9
357	Incidence	South Asia	Both	70+ years	Caries of permanent teeth	Rate	2021	15540.9	19700.6	12495.3
358	Incidence	High-income Asia Pacific	Both	25-29 years	Caries of permanent teeth	Rate	1990	52836.4	60732.4	44168.3
359	Incidence	High-income Asia Pacific	Both	25-29 years	Caries of permanent teeth	Rate	2021	48830.5	56461	40248.5
360	Incidence	High-income Asia Pacific	Both	30-34 years	Caries of permanent teeth	Rate	1990	45118.3	52936.4	37372.1
361	Incidence	High-income Asia Pacific	Both	30-34 years	Caries of permanent teeth	Rate	2021	39546.1	46104.8	32828.2
362	Incidence	High-income Asia Pacific	Both	35-39 years	Caries of permanent teeth	Rate	1990	39354.4	46923.1	31240.8
363	Incidence	High-income Asia Pacific	Both	35-39 years	Caries of permanent teeth	Rate	2021	34267.1	40345.8	27971.8
364	Incidence	High-income Asia Pacific	Both	40-44 years	Caries of permanent teeth	Rate	1990	34016	42155.9	26992.9
365	Incidence	High-income Asia Pacific	Both	40-44 years	Caries of permanent teeth	Rate	2021	30059.1	36123.7	24314
366	Incidence	High-income Asia Pacific	Both	45-49 years	Caries of permanent teeth	Rate	1990	29610.7	36533	23430.4
367	Incidence	Central Asia	Both	5-9 years	Caries of permanent teeth	Rate	1990	24835.8	41768.4	11113.4
368	Incidence	Central Asia	Both	5-9 years	Caries of permanent teeth	Rate	2021	24774.2	41690.3	10763.8
369	Incidence	Central Asia	Both	10-14 years	Caries of permanent teeth	Rate	1990	42373.2	55324.8	29089.1
370	Incidence	Central Asia	Both	10-14 years	Caries of permanent teeth	Rate	2021	43150.6	56495.4	29387
371	Incidence	Central Asia	Both	15-19 years	Caries of permanent teeth	Rate	1990	44613.1	56708.4	33830.1
372	Incidence	Central Asia	Both	15-19 years	Caries of permanent teeth	Rate	2021	45796.4	58280.5	34440.9
373	Incidence	Central Asia	Both	25-29 years	Caries of permanent teeth	Rate	1990	42823.2	58474.2	27590.5
374	Incidence	Central Asia	Both	25-29 years	Caries of permanent teeth	Rate	2021	44002.7	59517.1	29336.9
375	Incidence	Central Asia	Both	30-34 years	Caries of permanent teeth	Rate	1990	38999.6	51316.9	26707.4
376	Incidence	Central Asia	Both	30-34 years	Caries of permanent teeth	Rate	2021	39817.5	51749.9	27407.7
377	Incidence	Central Asia	Both	35-39 years	Caries of permanent teeth	Rate	1990	35787.8	48401.8	24566.1
378	Incidence	Central Asia	Both	35-39 years	Caries of permanent teeth	Rate	2021	36396.8	48931	24921
379	Incidence	Central Asia	Both	40-44 years	Caries of permanent teeth	Rate	1990	33141.5	45533.2	23065.7
380	Incidence	Central Asia	Both	40-44 years	Caries of permanent teeth	Rate	2021	33651.9	46040	23330.8
381	Incidence	Central Asia	Both	45-49 years	Caries of permanent teeth	Rate	1990	30875.3	40459.2	22456.2
382	Incidence	Central Europe	Both	5-9 years	Caries of permanent teeth	Rate	1990	31232.7	41088.6	19576.8
383	Incidence	Central Europe	Both	5-9 years	Caries of permanent teeth	Rate	2021	29016	41738.1	15785.7
384	Incidence	Central Europe	Both	10-14 years	Caries of permanent teeth	Rate	1990	40005.6	49486	30419.5
385	Incidence	Central Europe	Both	10-14 years	Caries of permanent teeth	Rate	2021	43625.6	54648.9	31909.7
386	Incidence	Central Europe	Both	15-19 years	Caries of permanent teeth	Rate	1990	40995	50951.1	31841.2
387	Incidence	Central Europe	Both	15-19 years	Caries of permanent teeth	Rate	2021	45068.5	55645.4	35399.4
388	Incidence	Southeast Asia	Both	25-29 years	Caries of permanent teeth	Rate	1990	51785.2	64241.6	37195.8
389	Incidence	Southeast Asia	Both	25-29 years	Caries of permanent teeth	Rate	2021	52702.5	64036.3	39972.4
390	Incidence	Southeast Asia	Both	30-34 years	Caries of permanent teeth	Rate	1990	47033	56584.9	35103.3
391	Incidence	Southeast Asia	Both	30-34 years	Caries of permanent teeth	Rate	2021	47571.8	56190.3	36296
392	Incidence	Southeast Asia	Both	35-39 years	Caries of permanent teeth	Rate	1990	42456.9	52184.5	31504.8
393	Incidence	Southeast Asia	Both	35-39 years	Caries of permanent teeth	Rate	2021	42940.8	51711.8	32944.5
394	Incidence	Southeast Asia	Both	40-44 years	Caries of permanent teeth	Rate	1990	38819.4	49543.7	28806.2
395	Incidence	Southeast Asia	Both	40-44 years	Caries of permanent teeth	Rate	2021	39299.7	49341.3	29506.8
396	Incidence	Southeast Asia	Both	45-49 years	Caries of permanent teeth	Rate	1990	35733.1	45175.5	27222
397	Incidence	East Asia	Both	25-29 years	Caries of permanent teeth	Rate	1990	32306.8	43504.7	24124.4
398	Incidence	East Asia	Both	25-29 years	Caries of permanent teeth	Rate	2021	42917.3	53959.2	33512.9
399	Incidence	East Asia	Both	30-34 years	Caries of permanent teeth	Rate	1990	26837.4	34302.1	19822.8
400	Incidence	East Asia	Both	30-34 years	Caries of permanent teeth	Rate	2021	34469.7	42817.5	26675.2
401	Incidence	East Asia	Both	35-39 years	Caries of permanent teeth	Rate	1990	22820.2	28867.4	17424.9
402	Incidence	East Asia	Both	35-39 years	Caries of permanent teeth	Rate	2021	28711	36151	22097
403	Incidence	East Asia	Both	40-44 years	Caries of permanent teeth	Rate	1990	19657.5	25318.6	15144.9
404	Incidence	East Asia	Both	40-44 years	Caries of permanent teeth	Rate	2021	24027.6	31013.5	18454.6
405	Incidence	East Asia	Both	45-49 years	Caries of permanent teeth	Rate	1990	16837.7	21748.9	12921.8
406	Incidence	Central Europe	Both	25-29 years	Caries of permanent teeth	Rate	1990	40890.1	54329.4	29123.5
407	Incidence	Central Europe	Both	25-29 years	Caries of permanent teeth	Rate	2021	43415.3	56410.3	31302.4
408	Incidence	Central Europe	Both	30-34 years	Caries of permanent teeth	Rate	1990	37817.5	47886.7	27252.5
409	Incidence	Central Europe	Both	30-34 years	Caries of permanent teeth	Rate	2021	39644.9	49555.8	28762.3
410	Incidence	Central Europe	Both	35-39 years	Caries of permanent teeth	Rate	1990	34906	45228.5	24703.4
411	Incidence	Central Europe	Both	35-39 years	Caries of permanent teeth	Rate	2021	36478.4	46493.2	26297
412	Incidence	Central Europe	Both	40-44 years	Caries of permanent teeth	Rate	1990	32659.8	43482.5	24144.1
413	Incidence	Central Europe	Both	40-44 years	Caries of permanent teeth	Rate	2021	33919.5	44492.7	25110.3
414	Incidence	Central Europe	Both	45-49 years	Caries of permanent teeth	Rate	1990	30456.5	40076.1	23112
415	Incidence	Australasia	Both	5-9 years	Caries of permanent teeth	Rate	1990	11110.4	13614.6	9314.13
416	Incidence	Australasia	Both	5-9 years	Caries of permanent teeth	Rate	2021	11125.5	25439.4	3892.37
417	Incidence	Australasia	Both	10-14 years	Caries of permanent teeth	Rate	1990	20788.1	24986	17421.7
418	Incidence	Australasia	Both	10-14 years	Caries of permanent teeth	Rate	2021	29457.1	48325.9	15688.6
419	Incidence	Australasia	Both	15-19 years	Caries of permanent teeth	Rate	1990	30184.2	38439.7	22960.3
420	Incidence	Australasia	Both	15-19 years	Caries of permanent teeth	Rate	2021	45835.3	59843	33092
421	Incidence	Australasia	Both	25-29 years	Caries of permanent teeth	Rate	1990	44599.4	57343.3	31067.3
422	Incidence	Australasia	Both	25-29 years	Caries of permanent teeth	Rate	2021	49010.8	61428.3	35042.1
423	Incidence	Australasia	Both	30-34 years	Caries of permanent teeth	Rate	1990	39468.3	49202.4	29490.7
424	Incidence	Australasia	Both	30-34 years	Caries of permanent teeth	Rate	2021	42027.8	53602.2	31102.1
425	Incidence	Australasia	Both	35-39 years	Caries of permanent teeth	Rate	1990	35933.9	45895	26093.8
426	Incidence	Australasia	Both	35-39 years	Caries of permanent teeth	Rate	2021	37267.1	48823.5	27625.9
427	Incidence	Australasia	Both	40-44 years	Caries of permanent teeth	Rate	1990	32743.9	42421.6	24254
428	Incidence	Australasia	Both	40-44 years	Caries of permanent teeth	Rate	2021	33404.3	43648.2	24469.8
429	Incidence	Australasia	Both	45-49 years	Caries of permanent teeth	Rate	1990	29406	37451	21770.2
430	Incidence	Oceania	Both	25-29 years	Caries of permanent teeth	Rate	1990	39094.2	55015.8	24741.6
431	Incidence	Oceania	Both	25-29 years	Caries of permanent teeth	Rate	2021	39512.5	54275.4	25173.5
432	Incidence	Oceania	Both	30-34 years	Caries of permanent teeth	Rate	1990	35584.9	47156.8	24413.2
433	Incidence	Oceania	Both	30-34 years	Caries of permanent teeth	Rate	2021	35554.8	46932	24796.1
434	Incidence	Oceania	Both	35-39 years	Caries of permanent teeth	Rate	1990	31966.8	43724.6	21654.2
435	Incidence	Oceania	Both	35-39 years	Caries of permanent teeth	Rate	2021	31632.5	41937.9	21448
436	Incidence	Oceania	Both	40-44 years	Caries of permanent teeth	Rate	1990	28769.5	41153.6	19840.8
437	Incidence	Oceania	Both	40-44 years	Caries of permanent teeth	Rate	2021	28412	39261.2	20083.5
438	Incidence	Oceania	Both	45-49 years	Caries of permanent teeth	Rate	1990	26091.4	35559.4	18560.2
439	Incidence	Eastern Europe	Both	5-9 years	Caries of permanent teeth	Rate	1990	25039.9	40995.9	11516.7
440	Incidence	Eastern Europe	Both	5-9 years	Caries of permanent teeth	Rate	2021	22144.1	38268.1	10077.8
441	Incidence	Eastern Europe	Both	10-14 years	Caries of permanent teeth	Rate	1990	43320.3	57244.7	29595
442	Incidence	Eastern Europe	Both	10-14 years	Caries of permanent teeth	Rate	2021	43526.9	58037.3	29856.6
443	Incidence	Eastern Europe	Both	15-19 years	Caries of permanent teeth	Rate	1990	48721.4	60888.3	37524.5
444	Incidence	Eastern Europe	Both	15-19 years	Caries of permanent teeth	Rate	2021	49978.5	61421.2	38766.7
445	Incidence	Caribbean	Both	5-9 years	Caries of permanent teeth	Rate	1990	27398.9	41780	13968.7
446	Incidence	Caribbean	Both	5-9 years	Caries of permanent teeth	Rate	2021	28841.1	40919.9	18656.7
447	Incidence	Caribbean	Both	10-14 years	Caries of permanent teeth	Rate	1990	43121.8	54964	30913.1
448	Incidence	Caribbean	Both	10-14 years	Caries of permanent teeth	Rate	2021	44309.3	53895.3	34269.2
449	Incidence	Caribbean	Both	15-19 years	Caries of permanent teeth	Rate	1990	45964.1	57397.4	35653.1
450	Incidence	Caribbean	Both	15-19 years	Caries of permanent teeth	Rate	2021	47754	57237.8	38778.3
451	Incidence	Caribbean	Both	25-29 years	Caries of permanent teeth	Rate	1990	41033.2	56183.5	27785.2
452	Incidence	Caribbean	Both	25-29 years	Caries of permanent teeth	Rate	2021	43499.6	55159.4	32716.6
453	Incidence	Caribbean	Both	30-34 years	Caries of permanent teeth	Rate	1990	37882	48501.5	26919.7
454	Incidence	Caribbean	Both	30-34 years	Caries of permanent teeth	Rate	2021	39148.5	47808.4	30303.2
455	Incidence	Caribbean	Both	35-39 years	Caries of permanent teeth	Rate	1990	35849.6	46620.7	25285.8
456	Incidence	Caribbean	Both	35-39 years	Caries of permanent teeth	Rate	2021	35975.7	44707.7	27078.1
457	Incidence	Caribbean	Both	40-44 years	Caries of permanent teeth	Rate	1990	33829.9	44813.2	24447.4
458	Incidence	Caribbean	Both	40-44 years	Caries of permanent teeth	Rate	2021	33303.4	43082	25081.2
459	Incidence	Caribbean	Both	45-49 years	Caries of permanent teeth	Rate	1990	31566.4	41776.1	23058
460	Incidence	High-income North America	Both	5-9 years	Caries of permanent teeth	Rate	1990	12195.7	25376.9	4655.67
461	Incidence	High-income North America	Both	5-9 years	Caries of permanent teeth	Rate	2021	10902.6	23351.8	4889.71
462	Incidence	High-income North America	Both	10-14 years	Caries of permanent teeth	Rate	1990	39699.2	55972.5	25344.2
463	Incidence	High-income North America	Both	10-14 years	Caries of permanent teeth	Rate	2021	33688.3	51386.6	20244.9
464	Incidence	High-income North America	Both	15-19 years	Caries of permanent teeth	Rate	1990	50656.3	62913.8	37825
465	Incidence	High-income North America	Both	15-19 years	Caries of permanent teeth	Rate	2021	49364.7	61503.4	36806.8
466	Incidence	High-income North America	Both	25-29 years	Caries of permanent teeth	Rate	1990	52839.8	62644	42912.4
467	Incidence	High-income North America	Both	25-29 years	Caries of permanent teeth	Rate	2021	52564.7	61457.2	43422
468	Incidence	High-income North America	Both	30-34 years	Caries of permanent teeth	Rate	1990	45129.9	54457	35930.5
469	Incidence	High-income North America	Both	30-34 years	Caries of permanent teeth	Rate	2021	44611.4	53266.1	35804.1
470	Incidence	High-income North America	Both	35-39 years	Caries of permanent teeth	Rate	1990	40029.9	49807.9	31147.6
471	Incidence	High-income North America	Both	35-39 years	Caries of permanent teeth	Rate	2021	39461.5	48745.3	31316.2
472	Incidence	High-income North America	Both	40-44 years	Caries of permanent teeth	Rate	1990	35512.5	45336.1	27393.8
473	Incidence	High-income North America	Both	40-44 years	Caries of permanent teeth	Rate	2021	34969.6	44195.9	27528
474	Incidence	High-income North America	Both	45-49 years	Caries of permanent teeth	Rate	1990	31091.6	40340.7	23328.7
475	Incidence	Eastern Europe	Both	25-29 years	Caries of permanent teeth	Rate	1990	49365.5	62125	35368.7
476	Incidence	Eastern Europe	Both	25-29 years	Caries of permanent teeth	Rate	2021	49672	61772.6	35755.7
477	Incidence	Eastern Europe	Both	30-34 years	Caries of permanent teeth	Rate	1990	44175.9	54174.4	32337.9
478	Incidence	Eastern Europe	Both	30-34 years	Caries of permanent teeth	Rate	2021	44208.9	54190.6	32249.4
479	Incidence	Eastern Europe	Both	35-39 years	Caries of permanent teeth	Rate	1990	39805.2	50579.6	28935.4
480	Incidence	Eastern Europe	Both	35-39 years	Caries of permanent teeth	Rate	2021	39693.7	49687.2	29435
481	Incidence	Eastern Europe	Both	40-44 years	Caries of permanent teeth	Rate	1990	36204.7	47176.7	26610.3
482	Incidence	Eastern Europe	Both	40-44 years	Caries of permanent teeth	Rate	2021	36013	46498.6	26751.8
483	Incidence	Eastern Europe	Both	45-49 years	Caries of permanent teeth	Rate	1990	33111	42257.1	25422.9
484	Incidence	Southern Sub-Saharan Africa	Both	5-9 years	Caries of permanent teeth	Rate	1990	9901.07	20836.2	4720.35
485	Incidence	Southern Sub-Saharan Africa	Both	5-9 years	Caries of permanent teeth	Rate	2021	10965.7	23103.5	5246.56
486	Incidence	Southern Sub-Saharan Africa	Both	10-14 years	Caries of permanent teeth	Rate	1990	25184.5	38288	15729.8
487	Incidence	Southern Sub-Saharan Africa	Both	10-14 years	Caries of permanent teeth	Rate	2021	29037.1	44129.5	17916.5
488	Incidence	Southern Sub-Saharan Africa	Both	15-19 years	Caries of permanent teeth	Rate	1990	43236	54944	33002.4
489	Incidence	Southern Sub-Saharan Africa	Both	15-19 years	Caries of permanent teeth	Rate	2021	44961	56198.6	33837.9
490	Incidence	Southern Sub-Saharan Africa	Both	25-29 years	Caries of permanent teeth	Rate	1990	47859.9	58620.7	36488.6
491	Incidence	Southern Sub-Saharan Africa	Both	25-29 years	Caries of permanent teeth	Rate	2021	47904.8	58758.4	37453.4
492	Incidence	Southern Sub-Saharan Africa	Both	30-34 years	Caries of permanent teeth	Rate	1990	39730.4	48427	30193.2
493	Incidence	Southern Sub-Saharan Africa	Both	30-34 years	Caries of permanent teeth	Rate	2021	40479.5	49511.8	31183.6
494	Incidence	Southern Sub-Saharan Africa	Both	35-39 years	Caries of permanent teeth	Rate	1990	32911.1	42229.5	24876
495	Incidence	Southern Sub-Saharan Africa	Both	35-39 years	Caries of permanent teeth	Rate	2021	34630.9	43736	26715.5
496	Incidence	Southern Sub-Saharan Africa	Both	40-44 years	Caries of permanent teeth	Rate	1990	28461.2	37257.9	21614.2
497	Incidence	Southern Sub-Saharan Africa	Both	40-44 years	Caries of permanent teeth	Rate	2021	29951.2	38762.2	22880.7
498	Incidence	Southern Sub-Saharan Africa	Both	45-49 years	Caries of permanent teeth	Rate	1990	25496.6	33383.4	19425.9
499	Incidence	North Africa and Middle East	Both	5-9 years	Caries of permanent teeth	Rate	1990	28721.1	42087.5	14892
500	Incidence	North Africa and Middle East	Both	5-9 years	Caries of permanent teeth	Rate	2021	28681.2	42990.6	14392.2
501	Incidence	North Africa and Middle East	Both	10-14 years	Caries of permanent teeth	Rate	1990	38488.4	50049.4	26347.8
502	Incidence	North Africa and Middle East	Both	10-14 years	Caries of permanent teeth	Rate	2021	38453.4	50673	25807.8
503	Incidence	North Africa and Middle East	Both	15-19 years	Caries of permanent teeth	Rate	1990	40594.5	51724.8	30074.3
504	Incidence	North Africa and Middle East	Both	15-19 years	Caries of permanent teeth	Rate	2021	40827.4	53195.6	29664.6
505	Incidence	North Africa and Middle East	Both	25-29 years	Caries of permanent teeth	Rate	1990	47361.3	60244.7	33523.8
506	Incidence	North Africa and Middle East	Both	25-29 years	Caries of permanent teeth	Rate	2021	48316.7	61007.2	34211.9
507	Incidence	North Africa and Middle East	Both	30-34 years	Caries of permanent teeth	Rate	1990	42277	52726.3	30819.6
508	Incidence	North Africa and Middle East	Both	30-34 years	Caries of permanent teeth	Rate	2021	43163.6	53300.6	31969.5
509	Incidence	North Africa and Middle East	Both	35-39 years	Caries of permanent teeth	Rate	1990	37049.1	47554.8	26559.2
510	Incidence	North Africa and Middle East	Both	35-39 years	Caries of permanent teeth	Rate	2021	37828.2	48154.5	27305
511	Incidence	North Africa and Middle East	Both	40-44 years	Caries of permanent teeth	Rate	1990	33427.2	44053.9	24835.3
512	Incidence	North Africa and Middle East	Both	40-44 years	Caries of permanent teeth	Rate	2021	33968.3	44527.1	25036
513	Incidence	North Africa and Middle East	Both	45-49 years	Caries of permanent teeth	Rate	1990	31074	40471.4	23950.5
514	Incidence	Western Sub-Saharan Africa	Both	5-9 years	Caries of permanent teeth	Rate	1990	10613	21855.3	4955.42
515	Incidence	Western Sub-Saharan Africa	Both	5-9 years	Caries of permanent teeth	Rate	2021	10362	21060.7	4937.14
516	Incidence	Western Sub-Saharan Africa	Both	10-14 years	Caries of permanent teeth	Rate	1990	32726.4	45969.4	21778.9
517	Incidence	Western Sub-Saharan Africa	Both	10-14 years	Caries of permanent teeth	Rate	2021	32760.6	46073.6	21731.1
518	Incidence	Western Sub-Saharan Africa	Both	15-19 years	Caries of permanent teeth	Rate	1990	46918.9	56608	37677.8
519	Incidence	Western Sub-Saharan Africa	Both	15-19 years	Caries of permanent teeth	Rate	2021	47430.9	57248	38653.6
520	Incidence	South Asia	Both	5-9 years	Caries of permanent teeth	Rate	1990	13068.4	25608	6178.58
521	Incidence	South Asia	Both	5-9 years	Caries of permanent teeth	Rate	2021	12574.6	24542.2	6465.25
522	Incidence	South Asia	Both	10-14 years	Caries of permanent teeth	Rate	1990	35989.7	50339.3	23568.9
523	Incidence	South Asia	Both	10-14 years	Caries of permanent teeth	Rate	2021	36176.5	49508.6	24696.3
524	Incidence	South Asia	Both	15-19 years	Caries of permanent teeth	Rate	1990	47216.6	58139.4	37004.9
525	Incidence	South Asia	Both	15-19 years	Caries of permanent teeth	Rate	2021	47966.1	58481.6	38290.2
526	Incidence	South Asia	Both	25-29 years	Caries of permanent teeth	Rate	1990	49958.7	61940	37159.1
527	Incidence	South Asia	Both	25-29 years	Caries of permanent teeth	Rate	2021	51744.8	62224	40397.4
528	Incidence	South Asia	Both	30-34 years	Caries of permanent teeth	Rate	1990	44711.2	54393	33860.7
529	Incidence	South Asia	Both	30-34 years	Caries of permanent teeth	Rate	2021	46165.4	54639.7	36155.4
530	Incidence	South Asia	Both	35-39 years	Caries of permanent teeth	Rate	1990	39466.5	49376	29518.5
531	Incidence	South Asia	Both	35-39 years	Caries of permanent teeth	Rate	2021	40766.4	49183.3	31549.9
532	Incidence	South Asia	Both	40-44 years	Caries of permanent teeth	Rate	1990	34904	45221.7	26382.8
533	Incidence	South Asia	Both	40-44 years	Caries of permanent teeth	Rate	2021	35968.1	45588.7	27571.1
534	Incidence	South Asia	Both	45-49 years	Caries of permanent teeth	Rate	1990	30874.7	39516.7	23638.2
535	Incidence	Western Sub-Saharan Africa	Both	25-29 years	Caries of permanent teeth	Rate	1990	48826.5	58721.5	38512.6
536	Incidence	Western Sub-Saharan Africa	Both	25-29 years	Caries of permanent teeth	Rate	2021	48253.6	57628.3	38520.7
537	Incidence	Western Sub-Saharan Africa	Both	30-34 years	Caries of permanent teeth	Rate	1990	41683.4	50085.3	33005.4
538	Incidence	Western Sub-Saharan Africa	Both	30-34 years	Caries of permanent teeth	Rate	2021	40451.7	47823.6	32181.7
539	Incidence	Western Sub-Saharan Africa	Both	35-39 years	Caries of permanent teeth	Rate	1990	35929.3	44274.4	27987.1
540	Incidence	Western Sub-Saharan Africa	Both	35-39 years	Caries of permanent teeth	Rate	2021	34641.2	42537.2	27408.9
541	Incidence	Western Sub-Saharan Africa	Both	40-44 years	Caries of permanent teeth	Rate	1990	31331.6	39882.8	24118.5
542	Incidence	Western Sub-Saharan Africa	Both	40-44 years	Caries of permanent teeth	Rate	2021	30063.7	37735.1	23378.7
543	Incidence	Western Sub-Saharan Africa	Both	45-49 years	Caries of permanent teeth	Rate	1990	27431.2	35184.3	21193.1
544	Incidence	Central Sub-Saharan Africa	Both	5-9 years	Caries of permanent teeth	Rate	1990	12831.2	27489.6	4815.91
545	Incidence	Central Sub-Saharan Africa	Both	5-9 years	Caries of permanent teeth	Rate	2021	13176.4	27578.9	4881.87
546	Incidence	Central Sub-Saharan Africa	Both	10-14 years	Caries of permanent teeth	Rate	1990	32701	49514.1	18645.3
547	Incidence	Central Sub-Saharan Africa	Both	10-14 years	Caries of permanent teeth	Rate	2021	33363.1	51452.4	19763.1
548	Incidence	Central Sub-Saharan Africa	Both	15-19 years	Caries of permanent teeth	Rate	1990	45229.7	58170.7	33548
549	Incidence	Central Sub-Saharan Africa	Both	15-19 years	Caries of permanent teeth	Rate	2021	45429.3	58248.1	34015.2
550	Incidence	Central Sub-Saharan Africa	Both	25-29 years	Caries of permanent teeth	Rate	1990	45214.5	59034.4	30825.8
551	Incidence	Central Sub-Saharan Africa	Both	25-29 years	Caries of permanent teeth	Rate	2021	44991.3	59060.7	30150.6
552	Incidence	Central Sub-Saharan Africa	Both	30-34 years	Caries of permanent teeth	Rate	1990	39359.7	50718.1	28378.8
553	Incidence	Central Sub-Saharan Africa	Both	30-34 years	Caries of permanent teeth	Rate	2021	39292	51149.6	27688
554	Incidence	Central Sub-Saharan Africa	Both	35-39 years	Caries of permanent teeth	Rate	1990	34283.3	45271.3	23832.6
555	Incidence	Central Sub-Saharan Africa	Both	35-39 years	Caries of permanent teeth	Rate	2021	34254	45878.4	24167.8
556	Incidence	Central Sub-Saharan Africa	Both	40-44 years	Caries of permanent teeth	Rate	1990	30128.7	40518.6	21528.4
557	Incidence	Central Sub-Saharan Africa	Both	40-44 years	Caries of permanent teeth	Rate	2021	30266.5	42517.8	21720.7
558	Incidence	Central Sub-Saharan Africa	Both	45-49 years	Caries of permanent teeth	Rate	1990	26948.9	36104.3	19132.2
559	Incidence	Eastern Sub-Saharan Africa	Both	5-9 years	Caries of permanent teeth	Rate	1990	19120.3	28909.4	12043.1
560	Incidence	Eastern Sub-Saharan Africa	Both	5-9 years	Caries of permanent teeth	Rate	2021	19175.4	30845.4	10622.5
561	Incidence	Eastern Sub-Saharan Africa	Both	10-14 years	Caries of permanent teeth	Rate	1990	33586.9	43137.5	25269.1
562	Incidence	Eastern Sub-Saharan Africa	Both	10-14 years	Caries of permanent teeth	Rate	2021	35150.5	45343	25315.6
563	Incidence	Eastern Sub-Saharan Africa	Both	15-19 years	Caries of permanent teeth	Rate	1990	42204.6	51142	33988.4
564	Incidence	Eastern Sub-Saharan Africa	Both	15-19 years	Caries of permanent teeth	Rate	2021	44279.4	53981.2	35527.3
565	Incidence	Eastern Sub-Saharan Africa	Both	25-29 years	Caries of permanent teeth	Rate	1990	44740.1	55914	34581
566	Incidence	Eastern Sub-Saharan Africa	Both	25-29 years	Caries of permanent teeth	Rate	2021	45934.5	56469.6	35967
567	Incidence	Eastern Sub-Saharan Africa	Both	30-34 years	Caries of permanent teeth	Rate	1990	38583	47370.7	29413.3
568	Incidence	Eastern Sub-Saharan Africa	Both	30-34 years	Caries of permanent teeth	Rate	2021	39152.7	47614.6	30515.8
569	Incidence	Eastern Sub-Saharan Africa	Both	35-39 years	Caries of permanent teeth	Rate	1990	33336.9	41505.7	25364
570	Incidence	Eastern Sub-Saharan Africa	Both	35-39 years	Caries of permanent teeth	Rate	2021	33593.2	41542.7	25880.7
571	Incidence	Eastern Sub-Saharan Africa	Both	40-44 years	Caries of permanent teeth	Rate	1990	29519.7	38382.1	22401.4
572	Incidence	Eastern Sub-Saharan Africa	Both	40-44 years	Caries of permanent teeth	Rate	2021	29591.1	37616.4	22617.7
573	Incidence	Eastern Sub-Saharan Africa	Both	45-49 years	Caries of permanent teeth	Rate	1990	26626.1	34271.6	20934.6
574	Incidence	Tropical Latin America	Both	5-9 years	Caries of permanent teeth	Rate	1990	31639.1	48131.7	15336.3
575	Incidence	Tropical Latin America	Both	5-9 years	Caries of permanent teeth	Rate	2021	24577.4	42123.2	10339
576	Incidence	Tropical Latin America	Both	10-14 years	Caries of permanent teeth	Rate	1990	43900.8	58310.5	29327.2
577	Incidence	Tropical Latin America	Both	10-14 years	Caries of permanent teeth	Rate	2021	43652.4	58332.2	29406.6
578	Incidence	Tropical Latin America	Both	15-19 years	Caries of permanent teeth	Rate	1990	48351.6	61225.3	36384
579	Incidence	Tropical Latin America	Both	15-19 years	Caries of permanent teeth	Rate	2021	49960.4	61467.3	38442.1
580	Incidence	Tropical Latin America	Both	25-29 years	Caries of permanent teeth	Rate	1990	51104.7	64272.5	35381.1
581	Incidence	Tropical Latin America	Both	25-29 years	Caries of permanent teeth	Rate	2021	52316.4	65093.2	36974.2
582	Incidence	Tropical Latin America	Both	30-34 years	Caries of permanent teeth	Rate	1990	46991.9	57634.1	33704.4
583	Incidence	Tropical Latin America	Both	30-34 years	Caries of permanent teeth	Rate	2021	48251	58707.8	35222.2
584	Incidence	Tropical Latin America	Both	35-39 years	Caries of permanent teeth	Rate	1990	43063.4	53295.6	31463.1
585	Incidence	Tropical Latin America	Both	35-39 years	Caries of permanent teeth	Rate	2021	44520.4	54745.5	32942.2
586	Incidence	Tropical Latin America	Both	40-44 years	Caries of permanent teeth	Rate	1990	39737.9	50761.5	29173.4
587	Incidence	Tropical Latin America	Both	40-44 years	Caries of permanent teeth	Rate	2021	41418.8	52302.5	30509.7
588	Incidence	Tropical Latin America	Both	45-49 years	Caries of permanent teeth	Rate	1990	36670.4	46113.6	28048.3
