# Supplementary material for: Global, Regional, and National Levels and Trends in Burden of Dental Caries and Periodontal Disease from 1990 to 2035：Result From the Global Burden of Disease Study 2021
Source: Research Square preprint supplement (doi:10.21203/rs.3.rs-5609270/v1), 2025-04-02
Supplement: Supplementary file 9 [file 2e98b5611d58f5168ed7e0f7.xlsx]

## Sheet: Sheet1
Exported data
	val	sd	Time	group	low_50	up_50	low_60	up_60	low_70	up_70	low_80	up_80	low	up
1	9496.63	3.74549	1990	5-9 years	9494.1	9499.15	9493.48	9499.78	9492.75	9500.51	9491.83	9501.43	9489.29	9503.97
2	9416.21	3.75067	1991	5-9 years	9413.69	9418.74	9413.06	9419.37	9412.33	9420.1	9411.4	9421.02	9408.86	9423.56
3	9341.31	3.75578	1992	5-9 years	9338.77	9343.84	9338.15	9344.46	9337.41	9345.2	9336.49	9346.12	9333.94	9348.67
4	9271.32	3.76112	1993	5-9 years	9268.79	9273.86	9268.16	9274.48	9267.42	9275.22	9266.5	9276.14	9263.95	9278.69
5	9203.12	3.76719	1994	5-9 years	9200.58	9205.66	9199.95	9206.29	9199.21	9207.02	9198.29	9207.95	9195.73	9210.5
6	9135.23	3.77413	1995	5-9 years	9132.69	9137.78	9132.06	9138.41	9131.32	9139.14	9130.39	9140.07	9127.84	9142.63
7	9072.63	3.78134	1996	5-9 years	9070.08	9075.18	9069.45	9075.81	9068.72	9076.55	9067.79	9077.48	9065.22	9080.04
8	9027.75	3.78717	1997	5-9 years	9025.2	9030.3	9024.57	9030.94	9023.83	9031.68	9022.9	9032.61	9020.33	9035.17
9	9011.19	3.79017	1998	5-9 years	9008.63	9013.74	9008	9014.38	9007.26	9015.12	9006.33	9016.05	9003.76	9018.62
10	9027.05	3.78967	1999	5-9 years	9024.5	9029.6	9023.86	9030.24	9023.12	9030.98	9022.19	9031.91	9019.62	9034.48
11	9069.72	3.78613	2000	5-9 years	9067.17	9072.27	9066.53	9072.9	9065.8	9073.64	9064.86	9074.57	9062.3	9077.14
12	9149.39	3.77799	2001	5-9 years	9146.84	9151.94	9146.21	9152.57	9145.48	9153.3	9144.55	9154.23	9141.98	9156.79
13	9266.77	3.76535	2002	5-9 years	9264.24	9269.31	9263.61	9269.94	9262.87	9270.67	9261.95	9271.6	9259.39	9274.15
14	9393.36	3.7517	2003	5-9 years	9390.84	9395.89	9390.21	9396.52	9389.48	9397.25	9388.55	9398.17	9386.01	9400.72
15	9496.26	3.74064	2004	5-9 years	9493.74	9498.78	9493.12	9499.41	9492.39	9500.14	9491.47	9501.06	9488.93	9503.59
16	9538.66	3.73589	2005	5-9 years	9536.14	9541.17	9535.51	9541.8	9534.79	9542.53	9533.87	9543.45	9531.33	9545.98
17	9489.91	3.74058	2006	5-9 years	9487.39	9492.43	9486.76	9493.05	9486.03	9493.78	9485.11	9494.7	9482.58	9497.24
18	9369.99	3.75275	2007	5-9 years	9367.46	9372.52	9366.84	9373.15	9366.1	9373.88	9365.18	9374.8	9362.64	9377.35
19	9219.56	3.76826	2008	5-9 years	9217.02	9222.1	9216.39	9222.73	9215.66	9223.47	9214.73	9224.39	9212.18	9226.95
20	9077.92	3.78286	2009	5-9 years	9075.37	9080.47	9074.74	9081.1	9074	9081.84	9073.07	9082.77	9070.5	9085.33
21	8979.41	3.79256	2010	5-9 years	8976.86	8981.97	8976.22	8982.6	8975.48	8983.34	8974.55	8984.27	8971.98	8986.84
22	8896.77	3.80025	2011	5-9 years	8894.21	8899.33	8893.57	8899.97	8892.83	8900.71	8891.9	8901.64	8889.32	8904.22
23	8795.35	3.81002	2012	5-9 years	8792.78	8797.92	8792.14	8798.55	8791.4	8799.3	8790.46	8800.23	8787.88	8802.82
24	8695.35	3.81968	2013	5-9 years	8692.78	8697.93	8692.14	8698.56	8691.39	8699.31	8690.45	8700.25	8687.86	8702.84
25	8616.72	3.82699	2014	5-9 years	8614.14	8619.3	8613.5	8619.94	8612.76	8620.69	8611.82	8621.63	8609.22	8624.22
26	8580.41	3.8295	2015	5-9 years	8577.83	8583	8577.19	8583.63	8576.45	8584.38	8575.5	8585.32	8572.91	8587.92
27	8600.34	3.82546	2016	5-9 years	8597.76	8602.92	8597.12	8603.56	8596.38	8604.3	8595.44	8605.24	8592.84	8607.84
28	8650.87	3.81778	2017	5-9 years	8648.3	8653.45	8647.66	8654.08	8646.92	8654.83	8645.98	8655.77	8643.39	8658.36
29	8698.38	3.81056	2018	5-9 years	8695.82	8700.95	8695.18	8701.59	8694.44	8702.33	8693.5	8703.27	8690.91	8705.85
30	8716.86	3.80707	2019	5-9 years	8714.3	8719.43	8713.66	8720.07	8712.92	8720.81	8711.98	8721.75	8709.4	8724.33
31	8657.53	3.81311	2020	5-9 years	8654.96	8660.1	8654.32	8660.73	8653.58	8661.48	8652.64	8662.42	8650.05	8665
32	8060.55	3.89053	2021	5-9 years	8057.93	8063.17	8057.28	8063.82	8056.52	8064.58	8055.56	8065.54	8052.92	8068.18
33	8247.86	127.519	2022	5-9 years	8161.91	8333.8	8140.61	8355.1	8115.74	8379.97	8084.38	8411.33	7997.92	8497.79
34	8155.39	162.277	2023	5-9 years	8046.02	8264.77	8018.92	8291.87	7987.28	8323.51	7947.36	8363.43	7837.33	8473.46
35	8064.29	202.867	2024	5-9 years	7927.55	8201.02	7893.68	8234.9	7854.12	8274.46	7804.21	8324.36	7666.67	8461.91
36	7974.58	247.943	2025	5-9 years	7807.47	8141.69	7766.06	8183.1	7717.71	8231.45	7656.72	8292.44	7488.61	8460.55
37	7886.32	296.592	2026	5-9 years	7686.42	8086.23	7636.89	8135.76	7579.05	8193.59	7506.09	8266.55	7305	8467.64
38	7799.56	348.175	2027	5-9 years	7564.89	8034.23	7506.74	8092.37	7438.85	8160.27	7353.2	8245.92	7117.13	8481.98
39	7714.32	402.231	2028	5-9 years	7443.22	7985.42	7376.04	8052.6	7297.61	8131.03	7198.66	8229.98	6925.95	8502.69
40	7630.65	458.41	2029	5-9 years	7321.68	7939.62	7245.12	8016.17	7155.73	8105.56	7042.96	8218.33	6732.16	8529.13
41	7548.57	516.437	2030	5-9 years	7200.49	7896.65	7114.25	7982.9	7013.54	8083.6	6886.5	8210.65	6536.36	8560.79
42	7468.13	576.095	2031	5-9 years	7079.84	7856.42	6983.63	7952.62	6871.29	8064.96	6729.57	8206.68	6338.98	8597.27
43	7389.34	637.207	2032	5-9 years	6959.86	7818.82	6853.45	7925.23	6729.19	8049.49	6572.44	8206.24	6140.42	8638.27
44	7312.24	699.63	2033	5-9 years	6840.69	7783.79	6723.85	7900.63	6587.42	8037.06	6415.31	8209.17	5940.96	8683.52
45	7236.85	763.25	2034	5-9 years	6722.42	7751.28	6594.96	7878.74	6446.12	8027.58	6258.36	8215.34	5740.88	8732.82
46	7163.2	827.971	2035	5-9 years	6605.14	7721.25	6466.87	7859.52	6305.42	8020.97	6101.74	8224.66	5540.37	8786.02
47	26313.7	3.19262	1990	10-14 years	26311.6	26315.9	26311	26316.4	26310.4	26317	26309.6	26317.8	26307.5	26320
48	26321.3	3.18357	1991	10-14 years	26319.2	26323.4	26318.6	26324	26318	26324.6	26317.2	26325.4	26315.1	26327.5
49	26317.9	3.17299	1992	10-14 years	26315.8	26320.1	26315.3	26320.6	26314.6	26321.2	26313.9	26322	26311.7	26324.2
50	26289.5	3.16102	1993	10-14 years	26287.4	26291.6	26286.8	26292.1	26286.2	26292.8	26285.4	26293.5	26283.3	26295.7
51	26220.1	3.14827	1994	10-14 years	26218	26222.3	26217.5	26222.8	26216.9	26223.4	26216.1	26224.2	26214	26226.3
52	26099.1	3.13514	1995	10-14 years	26096.9	26101.2	26096.4	26101.7	26095.8	26102.3	26095	26103.1	26092.9	26105.2
53	25924.3	3.12163	1996	10-14 years	25922.1	25926.4	25921.6	25926.9	25921	25927.5	25920.2	25928.3	25918.1	25930.4
54	25726.5	3.10913	1997	10-14 years	25724.4	25728.6	25723.9	25729.1	25723.3	25729.7	25722.5	25730.5	25720.4	25732.6
55	25549.7	3.09889	1998	10-14 years	25547.6	25551.8	25547.1	25552.3	25546.5	25552.9	25545.7	25553.7	25543.6	25555.8
56	25431.7	3.09141	1999	10-14 years	25429.6	25433.8	25429.1	25434.3	25428.5	25434.9	25427.8	25435.7	25425.7	25437.8
57	25412	3.08678	2000	10-14 years	25409.9	25414.1	25409.4	25414.6	25408.8	25415.2	25408.1	25416	25406	25418.1
58	25509.3	3.08545	2001	10-14 years	25507.2	25511.3	25506.7	25511.8	25506.1	25512.5	25505.3	25513.2	25503.2	25515.3
59	25686.9	3.08655	2002	10-14 years	25684.8	25688.9	25684.3	25689.5	25683.7	25690.1	25682.9	25690.8	25680.8	25692.9
60	25903.2	3.08936	2003	10-14 years	25901.1	25905.2	25900.6	25905.8	25900	25906.4	25899.2	25907.1	25897.1	25909.2
61	26114.4	3.09335	2004	10-14 years	26112.3	26116.4	26111.8	26117	26111.2	26117.6	26110.4	26118.3	26108.3	26120.4
62	26270.2	3.09783	2005	10-14 years	26268.1	26272.3	26267.6	26272.8	26267	26273.4	26266.2	26274.1	26264.1	26276.2
63	26337.1	3.10114	2006	10-14 years	26335	26339.2	26334.5	26339.7	26333.9	26340.3	26333.1	26341.1	26331	26343.2
64	26337.1	3.10323	2007	10-14 years	26335	26339.2	26334.5	26339.7	26333.9	26340.3	26333.1	26341	26331	26343.1
65	26296.8	3.10453	2008	10-14 years	26294.7	26298.9	26294.2	26299.4	26293.6	26300	26292.9	26300.8	26290.7	26302.9
66	26244.9	3.10512	2009	10-14 years	26242.8	26247	26242.3	26247.5	26241.7	26248.1	26240.9	26248.9	26238.8	26251
67	26204.8	3.10487	2010	10-14 years	26202.7	26206.9	26202.2	26207.4	26201.6	26208	26200.8	26208.8	26198.7	26210.9
68	26144.6	3.10397	2011	10-14 years	26142.5	26146.7	26142	26147.2	26141.3	26147.8	26140.6	26148.5	26138.5	26150.6
69	26029.5	3.10229	2012	10-14 years	26027.4	26031.6	26026.9	26032.1	26026.3	26032.7	26025.5	26033.5	26023.4	26035.6
70	25883.2	3.09956	2013	10-14 years	25881.1	25885.3	25880.6	25885.8	25880	25886.4	25879.2	25887.2	25877.1	25889.3
71	25727.3	3.09572	2014	10-14 years	25725.2	25729.3	25724.7	25729.9	25724.1	25730.5	25723.3	25731.2	25721.2	25733.3
72	25582.6	3.09078	2015	10-14 years	25580.5	25584.6	25580	25585.2	25579.4	25585.8	25578.6	25586.5	25576.5	25588.6
73	25349.8	3.08501	2016	10-14 years	25347.7	25351.9	25347.2	25352.4	25346.6	25353	25345.9	25353.8	25343.8	25355.9
74	24997.1	3.07892	2017	10-14 years	24995	24999.2	24994.5	24999.7	24993.9	25000.3	24993.1	25001	24991.1	25003.1
75	24643.3	3.0726	2018	10-14 years	24641.2	24645.4	24640.7	24645.9	24640.1	24646.5	24639.3	24647.2	24637.3	24649.3
76	24418.9	3.06573	2019	10-14 years	24416.8	24420.9	24416.3	24421.4	24415.7	24422	24414.9	24422.8	24412.8	24424.9
77	24402.9	3.05843	2020	10-14 years	24400.8	24404.9	24400.3	24405.4	24399.7	24406	24399	24406.8	24396.9	24408.9
78	23989.4	3.0573	2021	10-14 years	23987.3	23991.4	23986.8	23991.9	23986.2	23992.5	23985.4	23993.3	23983.4	23995.4
79	24020.3	285.906	2022	10-14 years	23827.6	24213	23779.9	24260.8	23724.1	24316.5	23653.8	24386.8	23459.9	24580.7
80	24000.2	315.963	2023	10-14 years	23787.2	24213.1	23734.5	24265.9	23672.8	24327.5	23595.1	24405.3	23380.9	24619.5
81	23905.9	341.656	2024	10-14 years	23675.6	24136.2	23618.6	24193.2	23551.9	24259.8	23467.9	24343.9	23236.2	24575.5
82	23712.8	366.405	2025	10-14 years	23465.9	23959.8	23404.7	24021	23333.2	24092.4	23243.1	24182.5	22994.7	24431
83	23445.9	402.788	2026	10-14 years	23174.4	23717.4	23107.1	23784.6	23028.6	23863.2	22929.5	23962.3	22656.4	24235.3
84	23182.5	462.09	2027	10-14 years	22871	23493.9	22793.8	23571.1	22703.7	23661.2	22590.1	23774.9	22276.8	24088.2
85	22922.7	543.637	2028	10-14 years	22556.3	23289.1	22465.5	23379.9	22359.5	23485.9	22225.8	23619.6	21857.2	23988.2
86	22666.7	644.152	2029	10-14 years	22232.6	23100.9	22125	23208.5	21999.4	23334.1	21840.9	23492.5	21404.2	23929.3
87	22414.7	760.029	2030	10-14 years	21902.4	22926.9	21775.5	23053.9	21627.3	23202.1	21440.3	23389	20925	23904.3
88	22166.7	888.252	2031	10-14 years	21568	22765.4	21419.7	22913.7	21246.5	23086.9	21028	23305.4	20425.7	23907.7
89	21922.9	1026.51	2032	10-14 years	21231	22614.8	21059.6	22786.2	20859.4	22986.4	20606.9	23238.9	19910.9	23934.9
90	21683.4	1173.07	2033	10-14 years	20892.8	22474.1	20696.9	22670	20468.1	22898.7	20179.5	23187.3	19384.2	23982.6
91	21448.3	1326.6	2034	10-14 years	20554.2	22342.4	20332.6	22564	20073.9	22822.7	19747.6	23149	18848.2	24048.4
92	21217.7	1486.11	2035	10-14 years	20216.1	22219.3	19967.9	22467.5	19678.1	22757.3	19312.5	23122.9	18304.9	24130.5
93	30747.9	3.23878	1990	15-19 years	30745.7	30750.1	30745.2	30750.6	30744.5	30751.2	30743.7	30752	30741.5	30754.2
94	30837.9	3.24142	1991	15-19 years	30835.7	30840.1	30835.2	30840.6	30834.5	30841.2	30833.7	30842	30831.5	30844.2
95	30942	3.24419	1992	15-19 years	30939.8	30944.2	30939.3	30944.7	30938.6	30945.4	30937.8	30946.2	30935.6	30948.4
96	31041.8	3.24504	1993	15-19 years	31039.6	31044	31039.1	31044.5	31038.4	31045.2	31037.7	31046	31035.5	31048.2
97	31112.7	3.24222	1994	15-19 years	31110.5	31114.9	31110	31115.4	31109.3	31116.1	31108.5	31116.9	31106.4	31119.1
98	31149.5	3.23485	1995	15-19 years	31147.3	31151.7	31146.8	31152.2	31146.2	31152.9	31145.4	31153.7	31143.2	31155.9
99	31160.2	3.22411	1996	15-19 years	31158	31162.3	31157.5	31162.9	31156.8	31163.5	31156	31164.3	31153.9	31166.5
100	31154.6	3.21104	1997	15-19 years	31152.5	31156.8	31151.9	31157.3	31151.3	31157.9	31150.5	31158.7	31148.3	31160.9
101	31139.1	3.19576	1998	15-19 years	31136.9	31141.2	31136.4	31141.7	31135.8	31142.4	31135	31143.2	31132.8	31145.3
102	31124.4	3.17888	1999	15-19 years	31122.3	31126.5	31121.7	31127.1	31121.1	31127.7	31120.3	31128.5	31118.2	31130.6
103	31122	3.16078	2000	15-19 years	31119.9	31124.2	31119.4	31124.7	31118.7	31125.3	31118	31126.1	31115.8	31128.2
104	31226.5	3.14193	2001	15-19 years	31224.4	31228.7	31223.9	31229.2	31223.3	31229.8	31222.5	31230.6	31220.4	31232.7
105	31469.5	3.12437	2002	15-19 years	31467.4	31471.6	31466.9	31472.2	31466.3	31472.8	31465.5	31473.5	31463.4	31475.7
106	31756.4	3.10956	2003	15-19 years	31754.3	31758.5	31753.8	31759	31753.2	31759.6	31752.4	31760.4	31750.3	31762.5
107	31993.2	3.09823	2004	15-19 years	31991.1	31995.2	31990.6	31995.8	31989.9	31996.4	31989.2	31997.1	31987.1	31999.2
108	32094.5	3.09082	2005	15-19 years	32092.4	32096.6	32091.9	32097.1	32091.3	32097.7	32090.6	32098.5	32088.5	32100.6
109	32090.7	3.08841	2006	15-19 years	32088.6	32092.8	32088.1	32093.3	32087.5	32093.9	32086.7	32094.6	32084.6	32096.7
110	32073.6	3.09005	2007	15-19 years	32071.5	32075.6	32071	32076.2	32070.4	32076.8	32069.6	32077.5	32067.5	32079.6
111	32064.3	3.09436	2008	15-19 years	32062.2	32066.4	32061.7	32066.9	32061.1	32067.5	32060.3	32068.2	32058.2	32070.3
112	32078.7	3.1003	2009	15-19 years	32076.6	32080.7	32076	32081.3	32075.4	32081.9	32074.7	32082.6	32072.6	32084.7
113	32127.3	3.10715	2010	15-19 years	32125.2	32129.4	32124.7	32129.9	32124	32130.5	32123.3	32131.2	32121.2	32133.4
114	32211.1	3.11268	2011	15-19 years	32209	32213.2	32208.5	32213.8	32207.9	32214.4	32207.1	32215.1	32205	32217.2
115	32299.6	3.1162	2012	15-19 years	32297.5	32301.7	32297	32302.2	32296.3	32302.8	32295.6	32303.6	32293.5	32305.7
116	32354	3.11823	2013	15-19 years	32351.9	32356.1	32351.4	32356.6	32350.8	32357.2	32350	32358	32347.9	32360.1
117	32345.8	3.11901	2014	15-19 years	32343.7	32347.9	32343.2	32348.4	32342.6	32349.1	32341.8	32349.8	32339.7	32351.9
118	32253.4	3.11806	2015	15-19 years	32251.3	32255.5	32250.8	32256	32250.2	32256.6	32249.4	32257.4	32247.3	32259.5
119	31926.4	3.11487	2016	15-19 years	31924.3	31928.5	31923.8	31929	31923.1	31929.6	31922.4	31930.4	31920.3	31932.5
120	31383.7	3.10962	2017	15-19 years	31381.6	31385.8	31381.1	31386.3	31380.5	31386.9	31379.7	31387.7	31377.6	31389.8
121	30861.6	3.1034	2018	15-19 years	30859.6	30863.7	30859	30864.3	30858.4	30864.9	30857.7	30865.6	30855.6	30867.7
122	30589.6	3.09693	2019	15-19 years	30587.5	30591.7	30587	30592.2	30586.4	30592.8	30585.6	30593.5	30583.5	30595.6
123	30571.4	3.09003	2020	15-19 years	30569.3	30573.5	30568.8	30574	30568.2	30574.6	30567.4	30575.4	30565.3	30577.4
124	30718.2	3.0818	2021	15-19 years	30716.1	30720.3	30715.6	30720.8	30715	30721.4	30714.3	30722.2	30712.2	30724.3
125	29667.7	345.689	2022	15-19 years	29434.7	29900.7	29376.9	29958.4	29309.5	30025.8	29224.5	30110.8	28990.1	30345.2
126	29415.3	377.682	2023	15-19 years	29160.7	29669.9	29097.7	29732.9	29024	29806.6	28931.1	29899.5	28675	30155.6
127	29228.6	407.897	2024	15-19 years	28953.7	29503.5	28885.6	29571.7	28806	29651.2	28705.7	29751.5	28429.1	30028.1
128	29122.4	437.386	2025	15-19 years	28827.6	29417.2	28754.6	29490.3	28669.3	29575.6	28561.7	29683.2	28265.1	29979.7
129	29084.1	467.785	2026	15-19 years	28768.8	29399.4	28690.7	29477.5	28599.5	29568.7	28484.4	29683.8	28167.2	30000.9
130	29085	500.217	2027	15-19 years	28747.9	29422.2	28664.4	29505.7	28566.8	29603.3	28443.8	29726.3	28104.6	30065.5
131	29060.8	531.697	2028	15-19 years	28702.4	29419.1	28613.6	29507.9	28509.9	29611.6	28379.1	29742.4	28018.6	30102.9
132	28946.7	559.108	2029	15-19 years	28569.9	29323.5	28476.5	29416.9	28367.5	29525.9	28229.9	29663.5	27850.9	30042.6
133	28713	584.981	2030	15-19 years	28318.7	29107.3	28221.1	29205	28107	29319.1	27963.1	29463	27566.5	29859.6
134	28389.9	621.356	2031	15-19 years	27971.1	28808.7	27867.4	28912.5	27746.2	29033.6	27593.3	29186.5	27172.1	29607.8
135	28071.1	681.131	2032	15-19 years	27612	28530.1	27498.2	28643.9	27365.4	28776.7	27197.9	28944.3	26736	29406.1
136	27756.6	765.943	2033	15-19 years	27240.4	28272.9	27112.5	28400.8	26963.1	28550.2	26774.7	28738.6	26255.4	29257.9
137	27446.8	874.094	2034	15-19 years	26857.7	28035.9	26711.7	28181.9	26541.2	28352.4	26326.2	28567.4	25733.6	29160
138	27141.7	1002.39	2035	15-19 years	26466.1	27817.3	26298.7	27984.7	26103.2	28180.2	25856.7	28426.8	25177	29106.4
139	39397	3.41142	1990	20-24 years	39394.7	39399.3	39394.1	39399.8	39393.4	39400.5	39392.6	39401.3	39390.3	39403.6
140	39318.2	3.39841	1991	20-24 years	39315.9	39320.5	39315.4	39321.1	39314.7	39321.7	39313.9	39322.6	39311.6	39324.9
141	39259.8	3.38897	1992	20-24 years	39257.5	39262.1	39256.9	39262.6	39256.3	39263.3	39255.4	39264.1	39253.1	39266.4
142	39219.5	3.38255	1993	20-24 years	39217.2	39221.7	39216.6	39222.3	39215.9	39223	39215.1	39223.8	39212.8	39226.1
143	39205	3.37969	1994	20-24 years	39202.7	39207.3	39202.2	39207.8	39201.5	39208.5	39200.7	39209.3	39198.4	39211.6
144	39224.5	3.37966	1995	20-24 years	39222.2	39226.8	39221.7	39227.3	39221	39228	39220.2	39228.8	39217.9	39231.1
145	39270.1	3.38173	1996	20-24 years	39267.8	39272.4	39267.3	39272.9	39266.6	39273.6	39265.8	39274.4	39263.5	39276.7
146	39318.1	3.38408	1997	20-24 years	39315.8	39320.4	39315.2	39320.9	39314.6	39321.6	39313.7	39322.4	39311.5	39324.7
147	39359.8	3.3838	1998	20-24 years	39357.5	39362.1	39357	39362.7	39356.3	39363.3	39355.5	39364.1	39353.2	39366.4
148	39386.4	3.37843	1999	20-24 years	39384.1	39388.7	39383.6	39389.2	39382.9	39389.9	39382.1	39390.7	39379.8	39393
149	39391.1	3.36756	2000	20-24 years	39388.8	39393.3	39388.2	39393.9	39387.6	39394.6	39386.8	39395.4	39384.5	39397.7
150	39451.8	3.35427	2001	20-24 years	39449.5	39454.1	39449	39454.6	39448.3	39455.3	39447.5	39456.1	39445.2	39458.4
151	39614.7	3.33976	2002	20-24 years	39612.4	39616.9	39611.8	39617.5	39611.2	39618.1	39610.4	39618.9	39608.1	39621.2
152	39807.6	3.32288	2003	20-24 years	39805.4	39809.8	39804.8	39810.4	39804.2	39811.1	39803.3	39811.9	39801.1	39814.1
153	39939	3.30265	2004	20-24 years	39936.8	39941.2	39936.2	39941.8	39935.6	39942.4	39934.8	39943.2	39932.5	39945.5
154	39912.8	3.27799	2005	20-24 years	39910.6	39915	39910	39915.5	39909.4	39916.2	39908.6	39917	39906.4	39919.2
155	39721.5	3.24895	2006	20-24 years	39719.3	39723.7	39718.8	39724.2	39718.1	39724.9	39717.3	39725.7	39715.1	39727.9
156	39463	3.21985	2007	20-24 years	39460.8	39465.2	39460.3	39465.7	39459.7	39466.3	39458.9	39467.1	39456.7	39469.3
157	39194.8	3.1938	2008	20-24 years	39192.7	39197	39192.2	39197.5	39191.5	39198.2	39190.8	39198.9	39188.6	39201.1
158	38970.5	3.17354	2009	20-24 years	38968.4	38972.7	38967.9	38973.2	38967.2	38973.8	38966.5	38974.6	38964.3	38976.7
159	38840.3	3.16213	2010	20-24 years	38838.2	38842.4	38837.6	38843	38837	38843.6	38836.2	38844.3	38834.1	38846.5
160	38831.6	3.16023	2011	20-24 years	38829.5	38833.7	38829	38834.3	38828.3	38834.9	38827.6	38835.7	38825.4	38837.8
161	38900.7	3.16442	2012	20-24 years	38898.6	38902.9	38898.1	38903.4	38897.5	38904	38896.7	38904.8	38894.5	38906.9
162	39002.5	3.17217	2013	20-24 years	39000.3	39004.6	38999.8	39005.1	38999.2	39005.8	38998.4	39006.5	38996.3	39008.7
163	39087.8	3.18133	2014	20-24 years	39085.6	39089.9	39085.1	39090.5	39084.5	39091.1	39083.7	39091.9	39081.6	39094
164	39112	3.18955	2015	20-24 years	39109.8	39114.1	39109.3	39114.6	39108.7	39115.3	39107.9	39116.1	39105.7	39118.2
165	38918.6	3.19239	2016	20-24 years	38916.5	38920.8	38915.9	38921.3	38915.3	38921.9	38914.5	38922.7	38912.4	38924.9
166	38512	3.18997	2017	20-24 years	38509.8	38514.1	38509.3	38514.6	38508.7	38515.3	38507.9	38516	38505.7	38518.2
167	38101	3.18598	2018	20-24 years	38098.8	38103.1	38098.3	38103.6	38097.7	38104.3	38096.9	38105	38094.7	38107.2
168	37905.6	3.18347	2019	20-24 years	37903.4	37907.7	37902.9	37908.2	37902.3	37908.9	37901.5	37909.6	37899.3	37911.8
169	37912.8	3.18201	2020	20-24 years	37910.7	37915	37910.2	37915.5	37909.5	37916.1	37908.7	37916.9	37906.6	37919.1
170	38040	3.18132	2021	20-24 years	38037.8	38042.1	38037.3	38042.6	38036.7	38043.3	38035.9	38044	38033.7	38046.2
171	38160.4	441.128	2022	20-24 years	37863.1	38457.7	37789.4	38531.4	37703.4	38617.4	37594.9	38725.9	37295.8	39025
172	37917.4	482.388	2023	20-24 years	37592.3	38242.6	37511.7	38323.1	37417.7	38417.2	37299	38535.8	36971.9	38862.9
173	37646.5	520.431	2024	20-24 years	37295.8	37997.3	37208.8	38084.2	37107.4	38185.7	36979.3	38313.7	36626.5	38666.6
174	37359.9	556.288	2025	20-24 years	36984.9	37734.8	36892	37827.7	36783.5	37936.2	36646.7	38073	36269.5	38450.2
175	37044.7	590.688	2026	20-24 years	36646.6	37442.8	36547.9	37541.4	36432.7	37656.6	36287.4	37801.9	35886.9	38202.4
176	36697.5	624.262	2027	20-24 years	36276.7	37118.2	36172.5	37222.5	36050.8	37344.2	35897.2	37497.8	35473.9	37921.1
177	36385.5	657.059	2028	20-24 years	35942.6	36828.3	35832.9	36938.1	35704.8	37066.2	35543.1	37227.8	35097.6	37673.3
178	36154.7	689.539	2029	20-24 years	35690	36619.5	35574.8	36734.6	35440.3	36869.1	35270.7	37038.7	34803.2	37506.2
179	36023.5	722.613	2030	20-24 years	35536.4	36510.5	35415.8	36631.2	35274.9	36772.1	35097.1	36949.9	34607.2	37439.8
180	35976.2	757.58	2031	20-24 years	35465.6	36486.8	35339.1	36613.3	35191.4	36761.1	35005	36947.4	34491.4	37461.1
181	35977.5	795.215	2032	20-24 years	35441.6	36513.5	35308.8	36646.3	35153.7	36801.4	34958.1	36997	34418.9	37536.2
182	35947.7	831.868	2033	20-24 years	35387	36508.3	35248.1	36647.3	35085.8	36809.5	34881.2	37014.1	34317.2	37578.1
183	35806.7	863.634	2034	20-24 years	35224.6	36388.8	35080.4	36533	34912	36701.4	34699.5	36913.9	34114	37499.4
184	35517.8	892.563	2035	20-24 years	34916.2	36119.4	34767.1	36268.4	34593.1	36442.5	34373.5	36662	33768.4	37267.2
185	38100.1	3.51463	1990	25-29 years	38097.7	38102.5	38097.2	38103.1	38096.5	38103.8	38095.6	38104.6	38093.2	38107
186	37921.3	3.47589	1991	25-29 years	37919	37923.7	37918.4	37924.2	37917.7	37924.9	37916.9	37925.8	37914.5	37928.1
187	37783.2	3.44467	1992	25-29 years	37780.8	37785.5	37780.3	37786.1	37779.6	37786.7	37778.7	37787.6	37776.4	37789.9
188	37714.5	3.42399	1993	25-29 years	37712.2	37716.9	37711.7	37717.4	37711	37718.1	37710.2	37718.9	37707.8	37721.3
189	37690.6	3.41021	1994	25-29 years	37688.3	37692.9	37687.7	37693.5	37687.1	37694.1	37686.2	37695	37683.9	37697.3
190	37705	3.40014	1995	25-29 years	37702.7	37707.3	37702.2	37707.9	37701.5	37708.5	37700.7	37709.4	37698.4	37711.7
191	37736.6	3.39023	1996	25-29 years	37734.3	37738.9	37733.8	37739.5	37733.1	37740.1	37732.3	37741	37730	37743.3
192	37789.3	3.38268	1997	25-29 years	37787.1	37791.6	37786.5	37792.2	37785.8	37792.8	37785	37793.7	37782.7	37796
193	37847	3.37678	1998	25-29 years	37844.7	37849.3	37844.2	37849.9	37843.5	37850.5	37842.7	37851.4	37840.4	37853.6
194	37923.9	3.37338	1999	25-29 years	37921.7	37926.2	37921.1	37926.8	37920.4	37927.4	37919.6	37928.3	37917.3	37930.5
195	38023.5	3.3728	2000	25-29 years	38021.2	38025.8	38020.6	38026.3	38020	38027	38019.2	38027.8	38016.9	38030.1
196	38250.8	3.37663	2001	25-29 years	38248.6	38253.1	38248	38253.7	38247.3	38254.3	38246.5	38255.2	38244.2	38257.4
197	38638.7	3.38358	2002	25-29 years	38636.4	38641	38635.8	38641.5	38635.2	38642.2	38634.3	38643	38632	38645.3
198	39071.2	3.38909	2003	25-29 years	39069	39073.5	39068.4	39074.1	39067.7	39074.7	39066.9	39075.6	39064.6	39077.9
199	39426.4	3.38863	2004	25-29 years	39424.1	39428.6	39423.5	39429.2	39422.9	39429.9	39422	39430.7	39419.7	39433
200	39591.9	3.37976	2005	25-29 years	39589.6	39594.2	39589.1	39594.7	39588.4	39595.4	39587.6	39596.2	39585.3	39598.5
201	39548	3.3641	2006	25-29 years	39545.7	39550.3	39545.2	39550.8	39544.5	39551.5	39543.7	39552.3	39541.4	39554.6
202	39385.8	3.34392	2007	25-29 years	39383.5	39388	39382.9	39388.6	39382.3	39389.2	39381.5	39390	39379.2	39392.3
203	39164	3.31984	2008	25-29 years	39161.8	39166.3	39161.2	39166.8	39160.6	39167.5	39159.8	39168.3	39157.5	39170.5
204	38939.1	3.29371	2009	25-29 years	38936.9	38941.4	38936.4	38941.9	38935.7	38942.6	38934.9	38943.4	38932.7	38945.6
205	38770.5	3.26773	2010	25-29 years	38768.3	38772.7	38767.8	38773.3	38767.1	38773.9	38766.3	38774.7	38764.1	38776.9
206	38667.3	3.24156	2011	25-29 years	38665.1	38669.5	38664.6	38670.1	38664	38670.7	38663.2	38671.5	38661	38673.7
207	38603.4	3.2167	2012	25-29 years	38601.2	38605.5	38600.6	38606.1	38600	38606.7	38599.2	38607.5	38597	38609.7
208	38570.7	3.19589	2013	25-29 years	38568.6	38572.9	38568.1	38573.4	38567.4	38574	38566.6	38574.8	38564.5	38577
209	38552.2	3.18068	2014	25-29 years	38550	38554.3	38549.5	38554.9	38548.9	38555.5	38548.1	38556.3	38545.9	38558.4
210	38522.7	3.17171	2015	25-29 years	38520.5	38524.8	38520	38525.3	38519.4	38525.9	38518.6	38526.7	38516.4	38528.9
211	38364.6	3.16864	2016	25-29 years	38362.5	38366.7	38361.9	38367.3	38361.3	38367.9	38360.5	38368.7	38358.4	38370.8
212	38067.6	3.16911	2017	25-29 years	38065.5	38069.7	38064.9	38070.3	38064.3	38070.9	38063.5	38071.7	38061.4	38073.8
213	37783.6	3.17272	2018	25-29 years	37781.4	37785.7	37780.9	37786.3	37780.3	37786.9	37779.5	37787.7	37777.4	37789.8
214	37674.9	3.17955	2019	25-29 years	37672.8	37677.1	37672.2	37677.6	37671.6	37678.2	37670.8	37679	37668.7	37681.1
215	37778.4	3.18846	2020	25-29 years	37776.3	37780.6	37775.8	37781.1	37775.1	37781.7	37774.3	37782.5	37772.2	37784.7
216	37842.4	3.19386	2021	25-29 years	37840.3	37844.6	37839.7	37845.1	37839.1	37845.7	37838.3	37846.5	37836.2	37848.7
217	37697.2	433.786	2022	25-29 years	37404.8	37989.6	37332.4	38062	37247.8	38146.6	37141.1	38253.3	36847	38547.4
218	37736.1	478.02	2023	25-29 years	37413.9	38058.3	37334.1	38138.1	37240.9	38231.3	37123.3	38348.9	36799.2	38673
219	37745.5	519.748	2024	25-29 years	37395.1	38095.8	37308.4	38182.6	37207	38283.9	37079.1	38411.8	36726.8	38764.2
220	37707.4	559.403	2025	25-29 years	37330.3	38084.4	37236.9	38177.8	37127.8	38286.9	36990.2	38424.5	36611	38803.8
221	37602	597.382	2026	25-29 years	37199.4	38004.6	37099.6	38104.4	36983.1	38220.9	36836.2	38367.9	36431.1	38772.9
222	37422	633.994	2027	25-29 years	36994.6	37849.3	36888.8	37955.1	36765.1	38078.8	36609.2	38234.7	36179.3	38664.6
223	37183.8	668.258	2028	25-29 years	36733.4	37634.3	36621.8	37745.9	36491.5	37876.2	36327.1	38040.6	35874.1	38493.6
224	36918.3	700.553	2029	25-29 years	36446.2	37390.5	36329.2	37507.5	36192.6	37644.1	36020.2	37816.4	35545.3	38291.4
225	36637.4	731.467	2030	25-29 years	36144.4	37130.4	36022.2	37252.5	35879.6	37395.2	35699.6	37575.1	35203.7	38071
226	36328.4	761.268	2031	25-29 years	35815.3	36841.5	35688.2	36968.6	35539.7	37117.1	35352.5	37304.4	34836.3	37820.5
227	35988.1	790.324	2032	25-29 years	35455.4	36520.8	35323.4	36652.8	35169.3	36806.9	34974.9	37001.3	34439.1	37537.1
228	35682.2	819.166	2033	25-29 years	35130.1	36234.4	34993.3	36371.2	34833.6	36530.9	34632.1	36732.4	34076.7	37287.8
229	35456.1	848.501	2034	25-29 years	34884.2	36028	34742.5	36169.7	34577	36335.1	34368.3	36543.9	33793	37119.1
230	35327.5	879.195	2035	25-29 years	34735	35920.1	34588.1	36066.9	34416.7	36238.4	34200.4	36454.7	33604.3	37050.8
231	35509.9	3.63447	1990	30-34 years	35507.5	35512.4	35506.8	35513	35506.1	35513.7	35505.2	35514.6	35502.8	35517
232	35608.7	3.61983	1991	30-34 years	35606.2	35611.1	35605.6	35611.7	35604.9	35612.4	35604	35613.3	35601.6	35615.8
233	35588.2	3.59295	1992	30-34 years	35585.8	35590.6	35585.2	35591.2	35584.5	35591.9	35583.6	35592.8	35581.2	35595.2
234	35446.5	3.5525	1993	30-34 years	35444.2	35448.9	35443.6	35449.5	35442.9	35450.2	35442	35451.1	35439.6	35453.5
235	35253	3.50791	1994	30-34 years	35250.6	35255.3	35250	35255.9	35249.3	35256.6	35248.5	35257.5	35246.1	35259.8
236	35062.7	3.46657	1995	30-34 years	35060.4	35065.1	35059.8	35065.6	35059.1	35066.3	35058.3	35067.2	35055.9	35069.5
237	34924.2	3.43294	1996	30-34 years	34921.9	34926.6	34921.4	34927.1	34920.7	34927.8	34919.8	34928.6	34917.5	34931
238	34837.1	3.40649	1997	30-34 years	34834.8	34839.4	34834.2	34839.9	34833.6	34840.6	34832.7	34841.5	34830.4	34843.8
239	34831.9	3.38951	1998	30-34 years	34829.6	34834.2	34829.1	34834.8	34828.4	34835.4	34827.6	34836.3	34825.3	34838.6
240	34874.2	3.37803	1999	30-34 years	34871.9	34876.5	34871.3	34877	34870.7	34877.7	34869.9	34878.5	34867.6	34880.8
241	34941.6	3.36899	2000	30-34 years	34939.3	34943.9	34938.8	34944.4	34938.1	34945.1	34937.3	34945.9	34935	34948.2
242	35154.7	3.36107	2001	30-34 years	35152.4	35157	35151.9	35157.5	35151.2	35158.2	35150.4	35159	35148.1	35161.3
243	35588.7	3.35768	2002	30-34 years	35586.5	35591	35585.9	35591.6	35585.3	35592.2	35584.4	35593	35582.2	35595.3
244	36083.4	3.35662	2003	30-34 years	36081.1	36085.7	36080.6	36086.2	36079.9	36086.9	36079.1	36087.7	36076.8	36090
245	36521.7	3.35679	2004	30-34 years	36519.5	36524	36518.9	36524.5	36518.2	36525.2	36517.4	36526	36515.1	36528.3
246	36780	3.35678	2005	30-34 years	36777.7	36782.2	36777.1	36782.8	36776.5	36783.4	36775.6	36784.3	36773.4	36786.5
247	36838	3.35601	2006	30-34 years	36835.7	36840.3	36835.2	36840.8	36834.5	36841.5	36833.7	36842.3	36831.4	36844.6
248	36792.2	3.3543	2007	30-34 years	36789.9	36794.4	36789.3	36795	36788.7	36795.6	36787.9	36796.5	36785.6	36798.7
249	36696.9	3.34966	2008	30-34 years	36694.6	36699.1	36694	36699.7	36693.4	36700.3	36692.6	36701.2	36690.3	36703.4
250	36602.3	3.34088	2009	30-34 years	36600.1	36604.6	36599.5	36605.1	36598.9	36605.8	36598.1	36606.6	36595.8	36608.9
251	36569.9	3.32934	2010	30-34 years	36567.7	36572.2	36567.1	36572.7	36566.5	36573.4	36565.7	36574.2	36563.4	36576.5
252	36593	3.31661	2011	30-34 years	36590.8	36595.3	36590.3	36595.8	36589.6	36596.5	36588.8	36597.3	36586.5	36599.5
253	36606.4	3.30143	2012	30-34 years	36604.2	36608.6	36603.6	36609.2	36603	36609.8	36602.2	36610.6	36599.9	36612.9
254	36594.8	3.28338	2013	30-34 years	36592.6	36597.1	36592.1	36597.6	36591.4	36598.2	36590.6	36599.1	36588.4	36601.3
255	36541.6	3.26275	2014	30-34 years	36539.4	36543.8	36538.8	36544.3	36538.2	36545	36537.4	36545.8	36535.2	36548
256	36437.2	3.23972	2015	30-34 years	36435	36439.4	36434.5	36439.9	36433.8	36440.5	36433	36441.3	36430.8	36443.5
257	36170.8	3.21296	2016	30-34 years	36168.6	36173	36168.1	36173.5	36167.5	36174.1	36166.7	36174.9	36164.5	36177.1
258	35760.2	3.18579	2017	30-34 years	35758.1	35762.4	35757.6	35762.9	35756.9	35763.5	35756.2	35764.3	35754	35766.5
259	35371.2	3.16277	2018	30-34 years	35369.1	35373.4	35368.6	35373.9	35367.9	35374.5	35367.2	35375.3	35365	35377.4
260	35161.7	3.14693	2019	30-34 years	35159.6	35163.8	35159.1	35164.4	35158.5	35165	35157.7	35165.8	35155.6	35167.9
261	35199.1	3.13961	2020	30-34 years	35197	35201.2	35196.5	35201.7	35195.9	35202.4	35195.1	35203.1	35192.9	35205.3
262	35193.2	3.13886	2021	30-34 years	35191.1	35195.3	35190.6	35195.8	35190	35196.5	35189.2	35197.2	35187.1	35199.4
263	34826.8	399.573	2022	30-34 years	34557.5	35096.1	34490.7	35162.8	34412.8	35240.7	34314.5	35339	34043.6	35609.9
264	34834.3	440.014	2023	30-34 years	34537.7	35130.9	34464.2	35204.3	34378.4	35290.1	34270.2	35398.4	33971.9	35696.7
265	34878.7	479.004	2024	30-34 years	34555.9	35201.6	34475.9	35281.5	34382.5	35375	34264.6	35492.8	33939.9	35817.6
266	34946.2	517.145	2025	30-34 years	34597.7	35294.8	34511.3	35381.1	34410.4	35482	34283.2	35609.2	33932.6	35959.8
267	35015.4	554.938	2026	30-34 years	34641.4	35389.4	34548.7	35482.1	34440.5	35590.3	34304	35726.8	33927.7	36103.1
268	35069.9	592.72	2027	30-34 years	34670.4	35469.4	34571.4	35568.3	34455.8	35683.9	34310	35829.7	33908.1	36231.6
269	35106.2	629.474	2028	30-34 years	34681.9	35530.5	34576.8	35635.6	34454.1	35758.3	34299.2	35913.2	33872.4	36340
270	35115	664.903	2029	30-34 years	34666.9	35563.2	34555.8	35674.2	34426.2	35803.9	34262.6	35967.4	33811.8	36418.2
271	35079.7	698.919	2030	30-34 years	34608.7	35550.8	34492	35667.5	34355.7	35803.8	34183.7	35975.8	33709.9	36449.6
272	34981.9	731.499	2031	30-34 years	34488.8	35474.9	34366.7	35597	34224	35739.7	34044.1	35919.6	33548.1	36415.6
273	34814.5	762.73	2032	30-34 years	34300.4	35328.6	34173	35455.9	34024.3	35604.7	33836.7	35792.3	33319.5	36309.4
274	34593.1	791.894	2033	30-34 years	34059.4	35126.8	33927.1	35259.1	33772.7	35413.5	33577.9	35608.3	33041	36145.2
275	34346.2	819.406	2034	30-34 years	33794	34898.5	33657.1	35035.4	33497.3	35195.1	33295.8	35396.7	32740.2	35952.3
276	34085	845.756	2035	30-34 years	33514.9	34655	33373.7	34796.3	33208.8	34961.2	33000.7	35169.2	32427.3	35742.7
277	35501.5	3.75172	1990	35-39 years	35499	35504	35498.3	35504.6	35497.6	35505.4	35496.7	35506.3	35494.1	35508.8
278	35544.5	3.71967	1991	35-39 years	35541.9	35547	35541.3	35547.6	35540.6	35548.3	35539.7	35549.2	35537.2	35551.7
279	35660.8	3.696	1992	35-39 years	35658.3	35663.3	35657.7	35663.9	35657	35664.6	35656.1	35665.5	35653.5	35668
280	35857.5	3.68313	1993	35-39 years	35855	35859.9	35854.4	35860.6	35853.6	35861.3	35852.7	35862.2	35850.2	35864.7
281	36089.7	3.67733	1994	35-39 years	36087.3	36092.2	36086.6	36092.8	36085.9	36093.5	36085	36094.4	36082.5	36096.9
282	36296.2	3.67151	1995	35-39 years	36293.7	36298.7	36293.1	36299.3	36292.4	36300	36291.5	36300.9	36289	36303.4
283	36439	3.65739	1996	35-39 years	36436.5	36441.4	36435.9	36442.1	36435.2	36442.8	36434.3	36443.7	36431.8	36446.1
284	36481.6	3.63039	1997	35-39 years	36479.1	36484	36478.5	36484.6	36477.8	36485.3	36476.9	36486.2	36474.4	36488.7
285	36393.4	3.58879	1998	35-39 years	36391	36395.8	36390.4	36396.4	36389.7	36397.1	36388.8	36398	36386.4	36400.5
286	36225.5	3.54212	1999	35-39 years	36223.1	36227.9	36222.5	36228.5	36221.9	36229.2	36221	36230.1	36218.6	36232.5
287	36026.5	3.49821	2000	35-39 years	36024.1	36028.8	36023.5	36029.4	36022.8	36030.1	36022	36030.9	36019.6	36033.3
288	36010.3	3.46515	2001	35-39 years	36007.9	36012.6	36007.4	36013.2	36006.7	36013.9	36005.8	36014.7	36003.5	36017.1
289	36252.9	3.44297	2002	35-39 years	36250.5	36255.2	36250	36255.8	36249.3	36256.4	36248.5	36257.3	36246.1	36259.6
290	36659.2	3.43157	2003	35-39 years	36656.9	36661.5	36656.3	36662.1	36655.7	36662.8	36654.8	36663.6	36652.5	36665.9
291	37047.4	3.42433	2004	35-39 years	37045.1	37049.7	37044.5	37050.3	37043.9	37051	37043	37051.8	37040.7	37054.1
292	37250.5	3.41591	2005	35-39 years	37248.2	37252.8	37247.6	37253.4	37247	37254.1	37246.1	37254.9	37243.8	37257.2
293	37215.3	3.40233	2006	35-39 years	37213	37217.6	37212.5	37218.2	37211.8	37218.9	37211	37219.7	37208.7	37222
294	37091.2	3.38886	2007	35-39 years	37088.9	37093.5	37088.4	37094.1	37087.7	37094.7	37086.9	37095.6	37084.6	37097.9
295	36920.8	3.37615	2008	35-39 years	36918.5	36923	36917.9	36923.6	36917.3	36924.3	36916.4	36925.1	36914.1	36927.4
296	36796.4	3.36658	2009	35-39 years	36794.2	36798.7	36793.6	36799.3	36792.9	36799.9	36792.1	36800.7	36789.8	36803
297	36800.2	3.36228	2010	35-39 years	36798	36802.5	36797.4	36803	36796.7	36803.7	36795.9	36804.5	36793.6	36806.8
298	36907.7	3.36262	2011	35-39 years	36905.5	36910	36904.9	36910.6	36904.3	36911.2	36903.4	36912	36901.1	36914.3
299	37027.1	3.36404	2012	35-39 years	37024.8	37029.3	37024.3	37029.9	37023.6	37030.6	37022.8	37031.4	37020.5	37033.7
300	37142.3	3.36366	2013	35-39 years	37140	37144.6	37139.5	37145.1	37138.8	37145.8	37138	37146.6	37135.7	37148.9
301	37229.8	3.3588	2014	35-39 years	37227.6	37232.1	37227	37232.7	37226.3	37233.3	37225.5	37234.1	37223.2	37236.4
302	37281.7	3.34876	2015	35-39 years	37279.4	37283.9	37278.9	37284.5	37278.2	37285.1	37277.4	37286	37275.1	37288.2
303	37195.9	3.33406	2016	35-39 years	37193.6	37198.1	37193.1	37198.7	37192.4	37199.3	37191.6	37200.1	37189.3	37202.4
304	36950.7	3.31491	2017	35-39 years	36948.5	36953	36947.9	36953.5	36947.3	36954.2	36946.5	36955	36944.2	36957.2
305	36671.3	3.29298	2018	35-39 years	36669.1	36673.5	36668.5	36674	36667.9	36674.7	36667.1	36675.5	36664.8	36677.7
306	36487.3	3.27049	2019	35-39 years	36485.1	36489.5	36484.5	36490	36483.9	36490.6	36483.1	36491.5	36480.9	36493.7
307	36368	3.2473	2020	35-39 years	36365.8	36370.2	36365.3	36370.7	36364.6	36371.4	36363.8	36372.2	36361.6	36374.4
308	36242.1	3.2224	2021	35-39 years	36239.9	36244.3	36239.4	36244.8	36238.8	36245.4	36238	36246.2	36235.8	36248.4
309	35909.1	411.167	2022	35-39 years	35632	36186.2	35563.3	36254.9	35483.1	36335.1	35382	36436.2	35103.2	36715
310	35774	451.013	2023	35-39 years	35470.1	36078	35394.7	36153.3	35306.8	36241.3	35195.8	36352.2	34890.1	36658
311	35661.8	488.903	2024	35-39 years	35332.3	35991.3	35250.6	36072.9	35155.3	36168.3	35035	36288.5	34703.5	36620
312	35579.3	525.682	2025	35-39 years	35225	35933.6	35137.2	36021.4	35034.7	36123.9	34905.4	36253.2	34549	36609.7
313	35523	562.133	2026	35-39 years	35144.1	35901.9	35050.3	35995.8	34940.6	36105.4	34802.4	36243.7	34421.2	36624.8
314	35491.9	598.941	2027	35-39 years	35088.2	35895.6	34988.2	35995.6	34871.4	36112.4	34724	36259.7	34318	36665.8
315	35499.7	635.588	2028	35-39 years	35071.3	35928	34965.1	36034.2	34841.2	36158.1	34684.8	36314.5	34253.9	36745.4
316	35545.1	672.103	2029	35-39 years	35092.1	35998.1	34979.8	36110.3	34848.8	36241.4	34683.4	36406.7	34227.7	36862.4
317	35614	708.608	2030	35-39 years	35136.4	36091.6	35018.1	36209.9	34879.9	36348.1	34705.6	36522.4	34225.1	37002.9
318	35684.7	745.187	2031	35-39 years	35182.4	36186.9	35058	36311.4	34912.6	36456.7	34729.3	36640	34224.1	37145.2
319	35740.3	781.92	2032	35-39 years	35213.3	36267.3	35082.7	36397.9	34930.2	36550.4	34737.9	36742.7	34207.7	37272.9
320	35777.5	817.869	2033	35-39 years	35226.2	36328.7	35089.6	36465.3	34930.2	36624.8	34729	36826	34174.4	37380.5
321	35786.6	852.629	2034	35-39 years	35212	36361.3	35069.6	36503.7	34903.3	36669.9	34693.6	36879.7	34115.5	37457.8
322	35750.8	885.927	2035	35-39 years	35153.7	36347.9	35005.7	36495.9	34833	36668.6	34615.1	36886.6	34014.4	37487.2
323	35837.7	4.05843	1990	40-44 years	35835	35840.5	35834.3	35841.1	35833.5	35841.9	35832.5	35842.9	35829.8	35845.7
324	35799.1	3.98463	1991	40-44 years	35796.4	35801.8	35795.7	35802.4	35794.9	35803.2	35794	35804.2	35791.3	35806.9
325	35824.8	3.9361	1992	40-44 years	35822.2	35827.5	35821.5	35828.2	35820.8	35828.9	35819.8	35829.9	35817.1	35832.6
326	35790.3	3.88409	1993	40-44 years	35787.7	35792.9	35787	35793.6	35786.3	35794.3	35785.3	35795.3	35782.7	35797.9
327	35823.5	3.84601	1994	40-44 years	35820.9	35826.1	35820.3	35826.8	35819.5	35827.5	35818.6	35828.4	35816	35831.1
328	35780.5	3.79312	1995	40-44 years	35777.9	35783	35777.3	35783.7	35776.5	35784.4	35775.6	35785.3	35773	35787.9
329	35808.8	3.76346	1996	40-44 years	35806.3	35811.4	35805.7	35812	35804.9	35812.7	35804	35813.7	35801.5	35816.2
330	35933.2	3.74205	1997	40-44 years	35930.7	35935.8	35930.1	35936.4	35929.4	35937.1	35928.4	35938	35925.9	35940.6
331	36156.4	3.73118	1998	40-44 years	36153.9	36158.9	36153.3	36159.5	36152.5	36160.3	36151.6	36161.2	36149.1	36163.7
332	36433.5	3.72689	1999	40-44 years	36431	36436	36430.4	36436.6	36429.6	36437.4	36428.7	36438.3	36426.2	36440.8
333	36676.3	3.72142	2000	40-44 years	36673.8	36678.8	36673.1	36679.4	36672.4	36680.1	36671.5	36681	36669	36683.6
334	36936.2	3.70872	2001	40-44 years	36933.7	36938.7	36933.1	36939.4	36932.4	36940.1	36931.5	36941	36929	36943.5
335	37232.5	3.68549	2002	40-44 years	37230	37235	37229.4	37235.6	37228.7	37236.3	37227.8	37237.2	37225.3	37239.7
336	37450.5	3.64783	2003	40-44 years	37448	37452.9	37447.4	37453.5	37446.7	37454.2	37445.8	37455.1	37443.3	37457.6
337	37550.6	3.60332	2004	40-44 years	37548.2	37553.1	37547.6	37553.7	37546.9	37554.4	37546	37555.2	37543.6	37557.7
338	37466.1	3.55797	2005	40-44 years	37463.7	37468.5	37463.1	37469.1	37462.4	37469.7	37461.5	37470.6	37459.1	37473
339	37222.3	3.51756	2006	40-44 years	37219.9	37224.7	37219.3	37225.3	37218.7	37225.9	37217.8	37226.8	37215.4	37229.2
340	36909.4	3.48289	2007	40-44 years	36907.1	36911.8	36906.5	36912.4	36905.8	36913.1	36905	36913.9	36902.6	36916.3
341	36638.8	3.45786	2008	40-44 years	36636.5	36641.1	36635.9	36641.7	36635.2	36642.4	36634.4	36643.2	36632	36645.6
342	36439.9	3.43922	2009	40-44 years	36437.6	36442.2	36437	36442.8	36436.3	36443.5	36435.5	36444.3	36433.2	36446.6
343	36361.4	3.42524	2010	40-44 years	36359.1	36363.7	36358.5	36364.3	36357.8	36364.9	36357	36365.8	36354.7	36368.1
344	36344.2	3.41163	2011	40-44 years	36341.9	36346.5	36341.3	36347	36340.6	36347.7	36339.8	36348.6	36337.5	36350.9
345	36354.1	3.40014	2012	40-44 years	36351.8	36356.4	36351.3	36357	36350.6	36357.6	36349.8	36358.5	36347.5	36360.8
346	36369.3	3.39049	2013	40-44 years	36367	36371.5	36366.4	36372.1	36365.7	36372.8	36364.9	36373.6	36362.6	36375.9
347	36418.1	3.38393	2014	40-44 years	36415.8	36420.4	36415.2	36420.9	36414.6	36421.6	36413.8	36422.4	36411.5	36424.7
348	36516.4	3.38112	2015	40-44 years	36514.1	36518.7	36513.6	36519.2	36512.9	36519.9	36512.1	36520.7	36509.8	36523
349	36556.9	3.38026	2016	40-44 years	36554.6	36559.2	36554.1	36559.8	36553.4	36560.4	36552.6	36561.3	36550.3	36563.5
350	36484.1	3.37852	2017	40-44 years	36481.8	36486.4	36481.2	36486.9	36480.6	36487.6	36479.8	36488.4	36477.5	36490.7
351	36397.4	3.37485	2018	40-44 years	36395.1	36399.7	36394.5	36400.2	36393.9	36400.9	36393.1	36401.7	36390.8	36404
352	36398.7	3.36836	2019	40-44 years	36396.5	36401	36395.9	36401.6	36395.3	36402.2	36394.4	36403.1	36392.1	36405.3
353	36394.4	3.35724	2020	40-44 years	36392.2	36396.7	36391.6	36397.3	36391	36397.9	36390.1	36398.7	36387.8	36401
354	36484	3.34527	2021	40-44 years	36481.7	36486.3	36481.2	36486.8	36480.5	36487.5	36479.7	36488.3	36477.4	36490.6
355	36230.1	414.883	2022	40-44 years	35950.5	36509.8	35881.2	36579.1	35800.3	36660	35698.3	36762	35417	37043.3
356	36183.3	456.175	2023	40-44 years	35875.9	36490.8	35799.7	36567	35710.7	36655.9	35598.5	36768.2	35289.2	37077.4
357	36127.3	495.142	2024	40-44 years	35793.6	36461.1	35710.9	36543.8	35614.4	36640.3	35492.6	36762.1	35156.9	37097.8
358	36060	532.418	2025	40-44 years	35701.1	36418.8	35612.2	36507.7	35508.4	36611.6	35377.4	36742.5	35016.4	37103.5
359	35951.2	568.401	2026	40-44 years	35568.1	36334.3	35473.2	36429.3	35362.4	36540.1	35222.6	36679.9	34837.2	37065.3
360	35814	603.739	2027	40-44 years	35407.1	36220.9	35306.3	36321.8	35188.5	36439.5	35040	36588	34630.7	36997.3
361	35679.4	638.114	2028	40-44 years	35249.4	36109.5	35142.8	36216.1	35018.4	36340.5	34861.4	36497.5	34428.7	36930.2
362	35567.6	671.841	2029	40-44 years	35114.8	36020.4	35002.6	36132.6	34871.6	36263.7	34706.3	36428.9	34250.8	36884.4
363	35485.5	705.376	2030	40-44 years	35010.1	35961	34892.3	36078.8	34754.8	36216.3	34581.2	36389.8	34103	36868.1
364	35429.5	739.163	2031	40-44 years	34931.3	35927.7	34807.9	36051.1	34663.7	36195.3	34481.9	36377.1	33980.7	36878.3
365	35398.6	773.692	2032	40-44 years	34877.1	35920.1	34747.9	36049.3	34597.1	36200.1	34406.7	36390.5	33882.2	36915
366	35406.5	808.604	2033	40-44 years	34861.5	35951.5	34726.5	36086.5	34568.8	36244.2	34369.9	36443.1	33821.6	36991.4
367	35451.9	843.861	2034	40-44 years	34883.2	36020.7	34742.2	36161.6	34577.7	36326.2	34370.1	36533.8	33798	37105.9
368	35520.8	879.418	2035	40-44 years	34928.1	36113.6	34781.2	36260.4	34609.8	36431.9	34393.4	36648.2	33797.2	37244.5
369	35683.1	4.39817	1990	45-49 years	35680.2	35686.1	35679.4	35686.8	35678.6	35687.7	35677.5	35688.8	35674.5	35691.8
370	35604.5	4.37152	1991	45-49 years	35601.6	35607.5	35600.9	35608.2	35600	35609.1	35598.9	35610.2	35596	35613.1
371	35480.9	4.30849	1992	45-49 years	35478	35483.8	35477.3	35484.5	35476.5	35485.4	35475.4	35486.4	35472.5	35489.4
372	35451.3	4.2471	1993	45-49 years	35448.5	35454.2	35447.8	35454.9	35446.9	35455.7	35445.9	35456.8	35443	35459.7
373	35310.6	4.16279	1994	45-49 years	35307.8	35313.4	35307.1	35314.1	35306.3	35314.9	35305.3	35315.9	35302.4	35318.8
374	35248.4	4.10031	1995	45-49 years	35245.6	35251.1	35244.9	35251.8	35244.1	35252.6	35243.1	35253.6	35240.3	35256.4
375	35211.1	4.02775	1996	45-49 years	35208.3	35213.8	35207.7	35214.4	35206.9	35215.2	35205.9	35216.2	35203.2	35219
376	35279.5	3.98187	1997	45-49 years	35276.8	35282.2	35276.1	35282.8	35275.4	35283.6	35274.4	35284.6	35271.7	35287.3
377	35296.5	3.9318	1998	45-49 years	35293.8	35299.1	35293.2	35299.8	35292.4	35300.5	35291.4	35301.5	35288.8	35304.2
378	35374.2	3.89519	1999	45-49 years	35371.6	35376.8	35370.9	35377.5	35370.2	35378.2	35369.2	35379.2	35366.6	35381.8
379	35349.7	3.84162	2000	45-49 years	35347.1	35352.2	35346.4	35352.9	35345.7	35353.6	35344.7	35354.6	35342.1	35357.2
380	35495.8	3.81318	2001	45-49 years	35493.2	35498.4	35492.6	35499	35491.9	35499.8	35490.9	35500.7	35488.3	35503.3
381	35875.3	3.7962	2002	45-49 years	35872.7	35877.9	35872.1	35878.5	35871.4	35879.2	35870.4	35880.2	35867.9	35882.7
382	36380.7	3.79032	2003	45-49 years	36378.2	36383.3	36377.5	36383.9	36376.8	36384.7	36375.9	36385.6	36373.3	36388.2
383	36867.7	3.78917	2004	45-49 years	36865.1	36870.2	36864.5	36870.9	36863.7	36871.6	36862.8	36872.5	36860.2	36875.1
384	37169.8	3.78312	2005	45-49 years	37167.2	37172.3	37166.6	37172.9	37165.8	37173.7	37164.9	37174.6	37162.3	37177.2
385	37198.3	3.76261	2006	45-49 years	37195.8	37200.9	37195.2	37201.5	37194.4	37202.2	37193.5	37203.2	37191	37205.7
386	36994.4	3.72507	2007	45-49 years	36991.9	36996.9	36991.2	36997.5	36990.5	36998.2	36989.6	36999.1	36987.1	37001.7
387	36608.9	3.67109	2008	45-49 years	36606.5	36611.4	36605.8	36612	36605.1	36612.7	36604.2	36613.6	36601.7	36616.1
388	36178.6	3.61315	2009	45-49 years	36176.1	36181	36175.5	36181.6	36174.8	36182.3	36173.9	36183.2	36171.5	36185.6
389	35828.8	3.56127	2010	45-49 years	35826.4	35831.2	35825.8	35831.8	35825.1	35832.5	35824.2	35833.3	35821.8	35835.7
390	35606.2	3.52082	2011	45-49 years	35603.8	35608.5	35603.2	35609.1	35602.5	35609.8	35601.6	35610.7	35599.3	35613.1
391	35438.6	3.48841	2012	45-49 years	35436.2	35440.9	35435.7	35441.5	35435	35442.2	35434.1	35443.1	35431.8	35445.4
392	35370.7	3.4666	2013	45-49 years	35368.3	35373	35367.7	35373.6	35367.1	35374.3	35366.2	35375.1	35363.9	35377.5
393	35359.6	3.45095	2014	45-49 years	35357.2	35361.9	35356.7	35362.5	35356	35363.1	35355.1	35364	35352.8	35366.3
394	35380.9	3.43823	2015	45-49 years	35378.5	35383.2	35378	35383.8	35377.3	35384.4	35376.5	35385.3	35374.1	35387.6
395	35285.2	3.42258	2016	45-49 years	35282.9	35287.5	35282.3	35288.1	35281.7	35288.8	35280.8	35289.6	35278.5	35291.9
396	35088.5	3.40724	2017	45-49 years	35086.2	35090.8	35085.7	35091.4	35085	35092.1	35084.2	35092.9	35081.8	35095.2
397	34883.8	3.39374	2018	45-49 years	34881.5	34886.1	34881	34886.7	34880.3	34887.3	34879.5	34888.2	34877.2	34890.5
398	34826.9	3.38524	2019	45-49 years	34824.6	34829.2	34824	34829.7	34823.4	34830.4	34822.5	34831.2	34820.2	34833.5
399	34861.2	3.38147	2020	45-49 years	34858.9	34863.4	34858.3	34864	34857.7	34864.7	34856.8	34865.5	34854.5	34867.8
400	35077.4	3.38383	2021	45-49 years	35075.1	35079.7	35074.6	35080.3	35073.9	35080.9	35073.1	35081.7	35070.8	35084
401	35182.8	402.893	2022	45-49 years	34911.3	35454.4	34844	35521.7	34765.4	35600.2	34666.3	35699.3	34393.2	35972.5
402	35266.2	444.636	2023	45-49 years	34966.5	35565.9	34892.3	35640.1	34805.6	35726.9	34696.2	35836.2	34394.7	36137.7
403	35335.5	484.338	2024	45-49 years	35009.1	35662	34928.2	35742.9	34833.8	35837.3	34714.6	35956.5	34386.2	36284.8
404	35381.3	522.437	2025	45-49 years	35029.2	35733.4	34941.9	35820.7	34840.1	35922.5	34711.5	36051.1	34357.3	36405.3
405	35391.6	559.602	2026	45-49 years	35014.4	35768.7	34920.9	35862.2	34811.8	35971.3	34674.1	36109	34294.7	36488.4
406	35365.5	596.253	2027	45-49 years	34963.6	35767.4	34864.1	35867	34747.8	35983.2	34601.1	36129.9	34196.9	36534.2
407	35320	631.753	2028	45-49 years	34894.2	35745.8	34788.7	35851.3	34665.5	35974.5	34510.1	36129.9	34081.7	36558.2
408	35265.5	666.126	2029	45-49 years	34816.5	35714.4	34705.3	35825.7	34575.4	35955.6	34411.5	36119.4	33959.9	36571.1
409	35199.8	699.546	2030	45-49 years	34728.3	35671.3	34611.5	35788.2	34475.1	35924.6	34303	36096.7	33828.7	36570.9
410	35093.8	731.865	2031	45-49 years	34600.6	35587.1	34478.3	35709.3	34335.6	35852.1	34155.6	36032.1	33659.4	36528.3
411	34960	763.667	2032	45-49 years	34445.3	35474.7	34317.8	35602.3	34168.9	35751.2	33981	35939	33463.2	36456.8
412	34828.8	794.895	2033	45-49 years	34293.1	35364.6	34160.3	35497.3	34005.3	35652.3	33809.8	35847.9	33270.8	36386.8
413	34719.8	825.901	2034	45-49 years	34163.1	35276.4	34025.2	35414.4	33864.2	35575.4	33661	35778.6	33101	36338.6
414	34639.8	857.073	2035	45-49 years	34062.1	35217.5	33919	35360.6	33751.9	35527.7	33541	35738.6	32959.9	36319.7
415	35511	4.54962	1990	50-54 years	35507.9	35514	35507.1	35514.8	35506.2	35515.7	35505.1	35516.8	35502	35519.9
416	35455.9	4.52765	1991	50-54 years	35452.8	35458.9	35452	35459.7	35451.2	35460.5	35450	35461.7	35447	35464.7
417	35335.6	4.51088	1992	50-54 years	35332.6	35338.7	35331.8	35339.4	35331	35340.3	35329.9	35341.4	35326.8	35344.5
418	35172.9	4.49667	1993	50-54 years	35169.9	35175.9	35169.1	35176.7	35168.3	35177.6	35167.1	35178.7	35164.1	35181.7
419	35015.6	4.48301	1994	50-54 years	35012.5	35018.6	35011.8	35019.3	35010.9	35020.2	35009.8	35021.3	35006.8	35024.3
420	34967.1	4.47605	1995	50-54 years	34964.1	34970.1	34963.3	34970.8	34962.4	34971.7	34961.3	34972.8	34958.3	34975.8
421	34950.6	4.4523	1996	50-54 years	34947.6	34953.6	34946.8	34954.3	34945.9	34955.2	34944.9	34956.3	34941.8	34959.3
422	34874.7	4.38775	1997	50-54 years	34871.8	34877.7	34871	34878.4	34870.2	34879.3	34869.1	34880.4	34866.1	34883.3
423	34881.9	4.32416	1998	50-54 years	34879	34884.9	34878.3	34885.6	34877.5	34886.4	34876.4	34887.5	34873.5	34890.4
424	34768	4.23527	1999	50-54 years	34765.2	34770.9	34764.5	34771.6	34763.6	34772.4	34762.6	34773.5	34759.7	34776.3
425	34712.9	4.16817	2000	50-54 years	34710.1	34715.7	34709.4	34716.4	34708.6	34717.2	34707.5	34718.2	34704.7	34721.1
426	34762.7	4.09392	2001	50-54 years	34760	34765.5	34759.3	34766.2	34758.5	34767	34757.5	34768	34754.7	34770.8
427	35072.2	4.05189	2002	50-54 years	35069.5	35075	35068.8	35075.6	35068	35076.4	35067	35077.4	35064.3	35080.2
428	35378.8	4.00623	2003	50-54 years	35376.1	35381.5	35375.5	35382.2	35374.7	35383	35373.7	35384	35371	35386.7
429	35693.6	3.97253	2004	50-54 years	35690.9	35696.3	35690.2	35696.9	35689.5	35697.7	35688.5	35698.7	35685.8	35701.4
430	35757.6	3.91639	2005	50-54 years	35754.9	35760.2	35754.3	35760.9	35753.5	35761.6	35752.6	35762.6	35749.9	35765.3
431	35675.7	3.87799	2006	50-54 years	35673	35678.3	35672.4	35678.9	35671.6	35679.7	35670.7	35680.6	35668.1	35683.3
432	35565.3	3.84543	2007	50-54 years	35562.8	35567.9	35562.1	35568.6	35561.4	35569.3	35560.4	35570.3	35557.8	35572.9
433	35496	3.82278	2008	50-54 years	35493.5	35498.6	35492.8	35499.2	35492.1	35500	35491.1	35500.9	35488.5	35503.5
434	35501.2	3.80776	2009	50-54 years	35498.6	35503.8	35498	35504.4	35497.2	35505.1	35496.3	35506.1	35493.7	35508.7
435	35580.1	3.79462	2010	50-54 years	35577.6	35582.7	35576.9	35583.3	35576.2	35584	35575.2	35585	35572.7	35587.5
436	35652.2	3.77389	2011	50-54 years	35649.7	35654.8	35649.1	35655.4	35648.3	35656.1	35647.4	35657.1	35644.8	35659.6
437	35614.4	3.73907	2012	50-54 years	35611.9	35616.9	35611.2	35617.5	35610.5	35618.3	35609.6	35619.2	35607.1	35621.7
438	35440.8	3.68869	2013	50-54 years	35438.3	35443.3	35437.7	35443.9	35437	35444.6	35436.1	35445.6	35433.6	35448.1
439	35193.9	3.63357	2014	50-54 years	35191.5	35196.4	35190.9	35197	35190.2	35197.7	35189.3	35198.6	35186.8	35201
440	34930.4	3.58236	2015	50-54 years	34928	34932.8	34927.4	34933.4	34926.7	34934.1	34925.8	34935	34923.4	34937.4
441	34621	3.53939	2016	50-54 years	34618.6	34623.4	34618	34624	34617.3	34624.7	34616.5	34625.5	34614.1	34627.9
442	34234	3.50241	2017	50-54 years	34231.6	34236.4	34231.1	34236.9	34230.4	34237.6	34229.5	34238.5	34227.1	34240.9
443	33935.4	3.4763	2018	50-54 years	33933	33937.7	33932.4	33938.3	33931.7	33939	33930.9	33939.8	33928.5	33942.2
444	33804.9	3.45846	2019	50-54 years	33802.5	33807.2	33802	33807.8	33801.3	33808.4	33800.4	33809.3	33798.1	33811.6
445	33752.3	3.44478	2020	50-54 years	33750	33754.6	33749.4	33755.2	33748.7	33755.9	33747.9	33756.7	33745.5	33759
446	33847	3.43307	2021	50-54 years	33844.6	33849.3	33844.1	33849.8	33843.4	33850.5	33842.6	33851.4	33840.2	33853.7
447	34116.5	390.797	2022	50-54 years	33853.1	34379.9	33787.9	34445.2	33711.7	34521.4	33615.5	34617.5	33350.6	34882.5
448	34159.1	430.749	2023	50-54 years	33868.8	34449.4	33796.8	34521.4	33712.9	34605.4	33606.9	34711.3	33314.8	35003.4
449	34197.3	468.778	2024	50-54 years	33881.3	34513.2	33803	34591.5	33711.6	34682.9	33596.3	34798.2	33278.5	35116.1
450	34241.4	505.64	2025	50-54 years	33900.6	34582.2	33816.1	34666.6	33717.5	34765.2	33593.1	34889.6	33250.3	35232.4
451	34311.6	542.564	2026	50-54 years	33945.9	34677.3	33855.3	34767.9	33749.5	34873.7	33616	35007.1	33248.2	35375
452	34395.1	579.947	2027	50-54 years	34004.2	34785.9	33907.3	34882.8	33794.2	34995.9	33651.6	35138.6	33258.4	35531.8
453	34476.7	616.739	2028	50-54 years	34061	34892.4	33958	34995.4	33837.8	35115.6	33686	35267.4	33267.9	35685.5
454	34544.6	652.595	2029	50-54 years	34104.8	34984.5	33995.8	35093.5	33868.5	35220.7	33708	35381.3	33265.5	35823.7
455	34589.5	687.493	2030	50-54 years	34126.1	35052.9	34011.3	35167.7	33877.3	35301.7	33708.1	35470.9	33242	35937
456	34599.7	721.646	2031	50-54 years	34113.3	35086	33992.8	35206.6	33852	35347.3	33674.5	35524.8	33185.2	36014.1
457	34574.3	755.356	2032	50-54 years	34065.2	35083.5	33939.1	35209.6	33791.8	35356.9	33606	35542.7	33093.9	36054.8
458	34530	788.198	2033	50-54 years	33998.7	35061.2	33867.1	35192.8	33713.4	35346.5	33519.5	35540.4	32985.1	36074.8
459	34476.8	820.206	2034	50-54 years	33924	35029.6	33787	35166.6	33627.1	35326.5	33425.3	35528.3	32869.2	36084.4
460	34412.8	851.441	2035	50-54 years	33838.9	34986.7	33696.7	35128.8	33530.7	35294.9	33321.2	35504.3	32744	36081.6
461	34927.8	4.78687	1990	55-59 years	34924.5	34931	34923.7	34931.8	34922.8	34932.7	34921.6	34933.9	34918.4	34937.1
462	34866.6	4.75636	1991	55-59 years	34863.4	34869.8	34862.6	34870.6	34861.7	34871.5	34860.5	34872.7	34857.3	34875.9
463	34828.4	4.72126	1992	55-59 years	34825.2	34831.6	34824.4	34832.3	34823.5	34833.3	34822.3	34834.4	34819.1	34837.6
464	34807.5	4.68904	1993	55-59 years	34804.3	34810.6	34803.5	34811.4	34802.6	34812.3	34801.5	34813.5	34798.3	34816.7
465	34828.8	4.66315	1994	55-59 years	34825.7	34832	34824.9	34832.7	34824	34833.7	34822.8	34834.8	34819.7	34838
466	34831.4	4.63905	1995	55-59 years	34828.3	34834.5	34827.5	34835.3	34826.6	34836.2	34825.4	34837.3	34822.3	34840.5
467	34827.7	4.62205	1996	55-59 years	34824.6	34830.8	34823.8	34831.6	34822.9	34832.5	34821.8	34833.6	34818.7	34836.8
468	34768.7	4.60974	1997	55-59 years	34765.6	34771.8	34764.8	34772.6	34763.9	34773.5	34762.8	34774.6	34759.6	34777.7
469	34663.6	4.59815	1998	55-59 years	34660.5	34666.7	34659.7	34667.5	34658.8	34668.4	34657.7	34669.5	34654.6	34672.6
470	34548.7	4.58459	1999	55-59 years	34545.6	34551.8	34544.9	34552.6	34544	34553.5	34542.8	34554.6	34539.7	34557.7
471	34531.6	4.57594	2000	55-59 years	34528.5	34534.7	34527.7	34535.4	34526.8	34536.3	34525.7	34537.4	34522.6	34540.6
472	34642.2	4.55238	2001	55-59 years	34639.1	34645.3	34638.4	34646	34637.5	34646.9	34636.3	34648	34633.3	34651.1
473	34824.3	4.4896	2002	55-59 years	34821.3	34827.3	34820.5	34828.1	34819.7	34829	34818.6	34830.1	34815.5	34833.1
474	35133.4	4.42911	2003	55-59 years	35130.4	35136.4	35129.6	35137.1	35128.8	35138	35127.7	35139	35124.7	35142
475	35258.9	4.33915	2004	55-59 years	35256	35261.8	35255.2	35262.5	35254.4	35263.4	35253.3	35264.5	35250.4	35267.4
476	35266.3	4.2665	2005	55-59 years	35263.4	35269.2	35262.7	35269.9	35261.9	35270.7	35260.8	35271.8	35257.9	35274.6
477	35116.5	4.17866	2006	55-59 years	35113.7	35119.3	35113	35120	35112.2	35120.8	35111.1	35121.8	35108.3	35124.7
478	34990.3	4.11868	2007	55-59 years	34987.5	34993	34986.8	34993.7	34986	34994.5	34985	34995.5	34982.2	34998.3
479	34768.4	4.0534	2008	55-59 years	34765.7	34771.2	34765	34771.9	34764.2	34772.6	34763.2	34773.6	34760.5	34776.4
480	34618.4	4.00354	2009	55-59 years	34615.7	34621.1	34615	34621.7	34614.2	34622.5	34613.2	34623.5	34610.5	34626.2
481	34452.5	3.93857	2010	55-59 years	34449.8	34455.2	34449.2	34455.8	34448.4	34456.6	34447.5	34457.6	34444.8	34460.2
482	34380.2	3.89912	2011	55-59 years	34377.6	34382.9	34377	34383.5	34376.2	34384.3	34375.2	34385.2	34372.6	34387.9
483	34395.2	3.86889	2012	55-59 years	34392.6	34397.8	34391.9	34398.4	34391.2	34399.2	34390.2	34400.1	34387.6	34402.7
484	34512.4	3.8504	2013	55-59 years	34509.8	34515	34509.1	34515.6	34508.4	34516.4	34507.4	34517.3	34504.8	34519.9
485	34699.5	3.83957	2014	55-59 years	34696.9	34702.1	34696.3	34702.7	34695.5	34703.5	34694.6	34704.4	34692	34707
486	34881.1	3.82855	2015	55-59 years	34878.5	34883.7	34877.9	34884.3	34877.1	34885.1	34876.2	34886	34873.6	34888.6
487	34853.6	3.80463	2016	55-59 years	34851	34856.1	34850.4	34856.8	34849.6	34857.5	34848.7	34858.5	34846.1	34861
488	34540.8	3.76247	2017	55-59 years	34538.3	34543.4	34537.7	34544	34536.9	34544.7	34536	34545.6	34533.4	34548.2
489	34077.1	3.70486	2018	55-59 years	34074.6	34079.6	34074	34080.2	34073.2	34080.9	34072.3	34081.8	34069.8	34084.3
490	33688.9	3.64648	2019	55-59 years	33686.5	33691.4	33685.9	33692	33685.1	33692.7	33684.2	33693.6	33681.8	33696.1
491	33344.5	3.59414	2020	55-59 years	33342	33346.9	33341.4	33347.5	33340.7	33348.2	33339.9	33349.1	33337.4	33351.5
492	33278.1	3.55726	2021	55-59 years	33275.7	33280.5	33275.1	33281.1	33274.4	33281.8	33273.5	33282.6	33271.1	33285
493	33334.2	381.97	2022	55-59 years	33076.8	33591.7	33013	33655.5	32938.5	33730	32844.6	33823.9	32585.6	34082.9
494	33292	419.955	2023	55-59 years	33008.9	33575	32938.8	33645.2	32856.9	33727.1	32753.6	33830.4	32468.9	34115.1
495	33308.2	456.718	2024	55-59 years	33000.4	33616	32924.1	33692.3	32835	33781.4	32722.7	33893.7	32413	34203.4
496	33366.6	492.863	2025	55-59 years	33034.4	33698.8	32952.1	33781.1	32856	33877.2	32734.7	33998.4	32400.6	34332.6
497	33427.6	528.747	2026	55-59 years	33071.2	33783.9	32982.9	33872.2	32879.8	33975.4	32749.7	34105.4	32391.2	34463.9
498	33481	564.69	2027	55-59 years	33100.4	33861.6	33006.1	33955.9	32896	34066	32757.1	34204.9	32374.2	34587.8
499	33522.9	599.8	2028	55-59 years	33118.6	33927.2	33018.5	34027.3	32901.5	34144.3	32754	34291.8	32347.3	34698.5
500	33560.5	634.101	2029	55-59 years	33133.1	33987.9	33027.2	34093.8	32903.6	34217.4	32747.6	34373.4	32317.6	34803.3
501	33603.9	667.992	2030	55-59 years	33153.7	34054.1	33042.1	34165.7	32911.9	34295.9	32747.5	34460.3	32294.6	34913.2
502	33672.9	702.406	2031	55-59 years	33199.5	34146.4	33082.2	34263.7	32945.2	34400.6	32772.4	34573.4	32296.2	35049.6
503	33755	737.556	2032	55-59 years	33257.9	34252.1	33134.7	34375.3	32990.9	34519.1	32809.5	34700.5	32309.4	35200.6
504	33835.3	772.451	2033	55-59 years	33314.6	34355.9	33185.6	34484.9	33035	34635.5	32845	34825.5	32321.3	35349.3
505	33902.1	806.654	2034	55-59 years	33358.4	34445.7	33223.7	34580.4	33066.4	34737.7	32867.9	34936.2	32321	35483.1
506	33946.2	840.012	2035	55-59 years	33380.1	34512.4	33239.8	34652.7	33076	34816.5	32869.3	35023.1	32299.8	35592.7
507	34676.7	5.06671	1990	60-64 years	34673.2	34680.1	34672.4	34680.9	34671.4	34681.9	34670.2	34683.1	34666.7	34686.6
508	34688.3	5.02415	1991	60-64 years	34685	34691.7	34684.1	34692.6	34683.1	34693.5	34681.9	34694.8	34678.5	34698.2
509	34680.3	4.99349	1992	60-64 years	34677	34683.7	34676.1	34684.5	34675.2	34685.5	34673.9	34686.7	34670.6	34690.1
510	34680.3	4.96914	1993	60-64 years	34676.9	34683.6	34676.1	34684.5	34675.1	34685.4	34673.9	34686.7	34670.6	34690
511	34643.8	4.94709	1994	60-64 years	34640.5	34647.2	34639.7	34648	34638.7	34648.9	34637.5	34650.2	34634.1	34653.5
512	34601.3	4.92251	1995	60-64 years	34598	34604.6	34597.2	34605.5	34596.2	34606.4	34595	34607.6	34591.7	34611
513	34545.6	4.89033	1996	60-64 years	34542.3	34548.9	34541.5	34549.7	34540.5	34550.7	34539.3	34551.9	34536	34555.2
514	34487.7	4.85089	1997	60-64 years	34484.5	34491	34483.7	34491.8	34482.7	34492.8	34481.5	34494	34478.2	34497.3
515	34433.6	4.81312	1998	60-64 years	34430.4	34436.9	34429.6	34437.7	34428.6	34438.6	34427.5	34439.8	34424.2	34443.1
516	34425.6	4.78142	1999	60-64 years	34422.3	34428.8	34421.5	34429.6	34420.6	34430.5	34419.4	34431.7	34416.2	34434.9
517	34410.2	4.75168	2000	60-64 years	34407	34413.4	34406.2	34414.2	34405.3	34415.1	34404.1	34416.3	34400.9	34419.5
518	34521.8	4.73497	2001	60-64 years	34518.6	34525	34517.8	34525.8	34516.9	34526.7	34515.7	34527.9	34512.5	34531.1
519	34757.4	4.73088	2002	60-64 years	34754.2	34760.6	34753.5	34761.4	34752.5	34762.3	34751.4	34763.5	34748.2	34766.7
520	35018.8	4.72942	2003	60-64 years	35015.7	35022	35014.9	35022.8	35013.9	35023.7	35012.8	35024.9	35009.6	35028.1
521	35219.9	4.72238	2004	60-64 years	35216.7	35223.1	35215.9	35223.9	35215	35224.8	35213.8	35226	35210.6	35229.2
522	35352.8	4.71254	2005	60-64 years	35349.6	35355.9	35348.8	35356.7	35347.9	35357.7	35346.7	35358.8	35343.5	35362
523	35300.8	4.67426	2006	60-64 years	35297.6	35303.9	35296.8	35304.7	35295.9	35305.6	35294.8	35306.7	35291.6	35309.9
524	35047.3	4.58398	2007	60-64 years	35044.2	35050.4	35043.4	35051.2	35042.5	35052	35041.4	35053.2	35038.3	35056.3
525	34836.9	4.49619	2008	60-64 years	34833.9	34840	34833.2	34840.7	34832.3	34841.6	34831.2	34842.7	34828.1	34845.8
526	34521.9	4.38452	2009	60-64 years	34519	34524.9	34518.2	34525.6	34517.4	34526.5	34516.3	34527.5	34513.3	34530.5
527	34321.9	4.3019	2010	60-64 years	34319	34324.8	34318.3	34325.5	34317.4	34326.4	34316.4	34327.4	34313.5	34330.3
528	34196.6	4.21256	2011	60-64 years	34193.8	34199.5	34193.1	34200.2	34192.3	34201	34191.2	34202	34188.4	34204.9
529	34172.9	4.15456	2012	60-64 years	34170.1	34175.7	34169.4	34176.4	34168.6	34177.2	34167.5	34178.2	34164.7	34181
530	34090	4.09249	2013	60-64 years	34087.3	34092.8	34086.6	34093.5	34085.8	34094.3	34084.8	34095.3	34082	34098.1
531	34074.9	4.04582	2014	60-64 years	34072.2	34077.6	34071.5	34078.3	34070.7	34079.1	34069.7	34080.1	34067	34082.8
532	33976	3.98206	2015	60-64 years	33973.3	33978.7	33972.6	33979.3	33971.9	33980.1	33970.9	33981.1	33968.2	33983.8
533	33777	3.93903	2016	60-64 years	33774.4	33779.7	33773.7	33780.4	33773	33781.1	33772	33782.1	33769.3	33784.8
534	33505.1	3.90142	2017	60-64 years	33502.5	33507.8	33501.9	33508.4	33501.1	33509.2	33500.1	33510.1	33497.5	33512.8
535	33316.9	3.87568	2018	60-64 years	33314.3	33319.5	33313.7	33320.2	33312.9	33320.9	33312	33321.9	33309.3	33324.5
536	33331.9	3.8614	2019	60-64 years	33329.3	33334.5	33328.6	33335.1	33327.9	33335.9	33326.9	33336.8	33324.3	33339.5
537	33409.6	3.84966	2020	60-64 years	33407	33412.2	33406.4	33412.8	33405.6	33413.6	33404.7	33414.5	33402	33417.1
538	33634.9	3.83556	2021	60-64 years	33632.4	33637.5	33631.7	33638.2	33631	33638.9	33630	33639.9	33627.4	33642.5
539	33646.5	386.028	2022	60-64 years	33386.4	33906.7	33321.9	33971.2	33246.6	34046.5	33151.7	34141.4	32889.9	34403.2
540	33524.9	423.223	2023	60-64 years	33239.7	33810.2	33169	33880.9	33086.5	33963.4	32982.4	34067.5	32695.4	34354.5
541	33345.2	457.47	2024	60-64 years	33036.9	33653.6	32960.5	33730	32871.3	33819.2	32758.8	33931.7	32448.6	34241.9
542	33156.8	489.979	2025	60-64 years	32826.5	33487	32744.7	33568.8	32649.2	33664.4	32528.6	33784.9	32196.4	34117.1
543	33001.1	522.206	2026	60-64 years	32649.2	33353.1	32562	33440.3	32460.1	33542.1	32331.7	33670.6	31977.6	34024.6
544	32898.8	555.076	2027	60-64 years	32524.7	33272.9	32432	33365.6	32323.7	33473.8	32187.2	33610.4	31810.8	33986.7
545	32857.2	588.098	2028	60-64 years	32460.8	33253.6	32362.6	33351.8	32247.9	33466.5	32103.3	33611.2	31704.5	34009.9
546	32873.3	621.316	2029	60-64 years	32454.6	33292.1	32350.8	33395.9	32229.7	33517	32076.8	33669.9	31655.6	34091.1
547	32931.1	654.821	2030	60-64 years	32489.7	33372.4	32380.4	33481.8	32252.7	33609.5	32091.6	33770.6	31647.6	34214.5
548	32991.4	688.405	2031	60-64 years	32527.4	33455.4	32412.5	33570.4	32278.2	33704.6	32108.9	33874	31642.2	34340.7
549	33044.3	722.234	2032	60-64 years	32557.5	33531.1	32436.9	33651.7	32296.1	33792.5	32118.4	33970.2	31628.7	34459.9
550	33085.8	755.52	2033	60-64 years	32576.6	33595	32450.4	33721.2	32303.1	33868.5	32117.2	34054.4	31605	34566.6
551	33123	788.274	2034	60-64 years	32591.7	33654.3	32460.1	33785.9	32306.4	33939.7	32112.4	34133.6	31578	34668
552	33166	820.849	2035	60-64 years	32612.7	33719.2	32475.6	33856.3	32315.6	34016.4	32113.7	34218.3	31557.1	34774.8
553	34168.1	5.63727	1990	65-69 years	34164.3	34171.9	34163.4	34172.9	34162.3	34174	34160.9	34175.4	34157.1	34179.2
554	34130.7	5.5609	1991	65-69 years	34126.9	34134.4	34126	34135.3	34124.9	34136.4	34123.5	34137.8	34119.8	34141.6
555	34112.4	5.4886	1992	65-69 years	34108.7	34116.1	34107.7	34117	34106.7	34118	34105.3	34119.4	34101.6	34123.1
556	34093.1	5.41956	1993	65-69 years	34089.4	34096.7	34088.5	34097.6	34087.5	34098.7	34086.1	34100	34082.4	34103.7
557	34107.3	5.35796	1994	65-69 years	34103.7	34110.9	34102.8	34111.8	34101.7	34112.8	34100.4	34114.2	34096.8	34117.8
558	34146	5.30881	1995	65-69 years	34142.4	34149.6	34141.5	34150.5	34140.5	34151.5	34139.2	34152.8	34135.6	34156.4
559	34178.3	5.26577	1996	65-69 years	34174.8	34181.9	34173.9	34182.8	34172.9	34183.8	34171.6	34185.1	34168	34188.7
560	34163.8	5.23271	1997	65-69 years	34160.3	34167.3	34159.4	34168.2	34158.4	34169.2	34157.1	34170.5	34153.6	34174.1
561	34138.8	5.20415	1998	65-69 years	34135.3	34142.3	34134.4	34143.2	34133.4	34144.2	34132.1	34145.5	34128.6	34149
562	34077.2	5.17579	1999	65-69 years	34073.7	34080.7	34072.8	34081.6	34071.8	34082.6	34070.6	34083.8	34067.1	34087.3
563	34017.8	5.14316	2000	65-69 years	34014.4	34021.3	34013.5	34022.2	34012.5	34023.2	34011.2	34024.4	34007.8	34027.9
564	34069.9	5.10817	2001	65-69 years	34066.5	34073.4	34065.6	34074.2	34064.6	34075.2	34063.4	34076.5	34059.9	34079.9
565	34276.3	5.07349	2002	65-69 years	34272.9	34279.8	34272.1	34280.6	34271.1	34281.6	34269.8	34282.8	34266.4	34286.3
566	34551	5.04384	2003	65-69 years	34547.6	34554.4	34546.8	34555.3	34545.8	34556.2	34544.6	34557.5	34541.1	34560.9
567	34828	5.01854	2004	65-69 years	34824.7	34831.4	34823.8	34832.3	34822.8	34833.2	34821.6	34834.5	34818.2	34837.9
568	34935.6	4.98714	2005	65-69 years	34932.3	34939	34931.4	34939.8	34930.5	34940.8	34929.2	34942	34925.9	34945.4
569	34882.3	4.9547	2006	65-69 years	34879	34885.6	34878.1	34886.5	34877.2	34887.4	34876	34888.7	34872.6	34892
570	34728.6	4.92458	2007	65-69 years	34725.2	34731.9	34724.4	34732.7	34723.5	34733.7	34722.3	34734.9	34718.9	34738.2
571	34520.5	4.89311	2008	65-69 years	34517.2	34523.8	34516.4	34524.6	34515.4	34525.6	34514.2	34526.8	34510.9	34530.1
572	34318.9	4.85951	2009	65-69 years	34315.6	34322.2	34314.8	34323	34313.9	34323.9	34312.7	34325.1	34309.4	34328.4
573	34269.7	4.83474	2010	65-69 years	34266.4	34272.9	34265.6	34273.7	34264.7	34274.7	34263.5	34275.9	34260.2	34279.2
574	34256.5	4.79222	2011	65-69 years	34253.3	34259.8	34252.5	34260.6	34251.6	34261.5	34250.4	34262.7	34247.2	34265.9
575	34123.8	4.69896	2012	65-69 years	34120.7	34127	34119.9	34127.8	34119	34128.7	34117.8	34129.9	34114.6	34133
576	34056.9	4.61039	2013	65-69 years	34053.8	34060	34053	34060.8	34052.1	34061.7	34051	34062.8	34047.9	34066
577	33851.8	4.4954	2014	65-69 years	33848.8	33854.9	33848.1	33855.6	33847.2	33856.5	33846.1	33857.6	33843	33860.7
578	33690.5	4.40913	2015	65-69 years	33687.6	33693.5	33686.8	33694.2	33686	33695.1	33684.9	33696.2	33681.9	33699.2
579	33426.4	4.30931	2016	65-69 years	33423.5	33429.3	33422.8	33430.1	33422	33430.9	33420.9	33432	33418	33434.9
580	33099.1	4.23757	2017	65-69 years	33096.2	33101.9	33095.5	33102.6	33094.7	33103.4	33093.6	33104.5	33090.7	33107.4
581	32704.3	4.16285	2018	65-69 years	32701.5	32707.1	32700.8	32707.8	32700	32708.6	32699	32709.7	32696.2	32712.5
582	32520.1	4.10968	2019	65-69 years	32517.3	32522.9	32516.7	32523.6	32515.9	32524.4	32514.8	32525.4	32512.1	32528.2
583	32364.2	4.04492	2020	65-69 years	32361.5	32366.9	32360.8	32367.6	32360	32368.4	32359	32369.4	32356.3	32372.1
584	32432.7	4.013	2021	65-69 years	32430	32435.4	32429.4	32436.1	32428.6	32436.9	32427.6	32437.9	32424.9	32440.6
585	32634.5	374.807	2022	65-69 years	32381.9	32887.2	32319.3	32949.7	32246.2	33022.8	32154	33115	31899.9	33369.2
586	32746.1	413.886	2023	65-69 years	32467.1	33025	32398	33094.1	32317.3	33174.8	32215.5	33276.7	31934.8	33557.3
587	32882.5	451.665	2024	65-69 years	32578.1	33187	32502.7	33262.4	32414.6	33350.5	32303.5	33461.6	31997.3	33767.8
588	33001.4	488.233	2025	65-69 years	32672.4	33330.5	32590.8	33412	32495.6	33507.2	32375.5	33627.3	32044.5	33958.4
589	33065.4	523.835	2026	65-69 years	32712.3	33418.5	32624.9	33506	32522.7	33608.1	32393.9	33737	32038.7	34092.1
590	33038.3	558.035	2027	65-69 years	32662.2	33414.4	32569	33507.6	32460.2	33616.4	32322.9	33753.7	31944.5	34132
591	32919	589.691	2028	65-69 years	32521.6	33316.5	32423.1	33414.9	32308.1	33529.9	32163	33675	31763.2	34074.8
592	32742.7	619.243	2029	65-69 years	32325.3	33160.1	32221.9	33263.5	32101.2	33384.2	31948.8	33536.6	31529	33956.4
593	32557.8	647.742	2030	65-69 years	32121.2	32994.3	32013	33102.5	31886.7	33228.8	31727.4	33388.2	31288.2	33827.3
594	32405.1	676.488	2031	65-69 years	31949.1	32861	31836.1	32974	31704.2	33105.9	31537.8	33272.3	31079.1	33731
595	32304.7	706.381	2032	65-69 years	31828.6	32780.8	31710.6	32898.8	31572.9	33036.5	31399.1	33210.3	30920.2	33689.2
596	32264	737.06	2033	65-69 years	31767.2	32760.8	31644.1	32883.9	31500.4	33027.6	31319.1	33208.9	30819.4	33708.6
597	32280	768.497	2034	65-69 years	31762	32797.9	31633.7	32926.3	31483.8	33076.1	31294.8	33265.2	30773.7	33786.2
598	32336.8	800.605	2035	65-69 years	31797.2	32876.4	31663.5	33010.1	31507.4	33166.2	31310.4	33363.2	30767.6	33906
