# Supplementary material for: Global, Regional, and National Levels and Trends in Burden of Dental Caries and Periodontal Disease from 1990 to 2035：Result From the Global Burden of Disease Study 2021
Source: Research Square preprint supplement (doi:10.21203/rs.3.rs-5609270/v1), 2025-04-02
Supplement: Supplementary file 10 [file 384fb67a26aa1a41b73037a7.xlsx]

## Sheet: Sheet1
Exported data
	val	sd	Time	group	low_50	up_50	low_60	up_60	low_70	up_70	low_80	up_80	low	up
1	1127.7	6.48023	1990	15-19 years	1123.33	1132.07	1122.25	1133.15	1120.98	1134.41	1119.39	1136.01	1115	1140.4
2	1149.39	6.4536	1991	15-19 years	1145.04	1153.74	1143.96	1154.81	1142.7	1156.07	1141.11	1157.66	1136.74	1162.04
3	1173.21	6.42495	1992	15-19 years	1168.88	1177.54	1167.81	1178.61	1166.55	1179.87	1164.97	1181.45	1160.62	1185.8
4	1197.27	6.39658	1993	15-19 years	1192.96	1201.58	1191.89	1202.65	1190.64	1203.9	1189.07	1205.47	1184.73	1209.81
5	1218.62	6.37183	1994	15-19 years	1214.33	1222.92	1213.26	1223.98	1212.02	1225.22	1210.45	1226.79	1206.13	1231.11
6	1237.07	6.35071	1995	15-19 years	1232.79	1241.35	1231.73	1242.41	1230.49	1243.65	1228.93	1245.21	1224.62	1249.52
7	1253.58	6.33201	1996	15-19 years	1249.31	1257.85	1248.26	1258.91	1247.02	1260.14	1245.46	1261.7	1241.17	1265.99
8	1267.91	6.31591	1997	15-19 years	1263.65	1272.17	1262.6	1273.22	1261.37	1274.45	1259.81	1276.01	1255.53	1280.29
9	1279.13	6.30332	1998	15-19 years	1274.89	1283.38	1273.83	1284.44	1272.6	1285.66	1271.05	1287.22	1266.78	1291.49
10	1287.26	6.29417	1999	15-19 years	1283.02	1291.5	1281.97	1292.55	1280.74	1293.78	1279.19	1295.33	1274.92	1299.6
11	1292.37	6.28829	2000	15-19 years	1288.13	1296.61	1287.08	1297.66	1285.86	1298.89	1284.31	1300.43	1280.05	1304.7
12	1287.96	6.2927	2001	15-19 years	1283.72	1292.2	1282.66	1293.25	1281.44	1294.48	1279.89	1296.02	1275.62	1300.29
13	1273.94	6.30764	2002	15-19 years	1269.69	1278.19	1268.63	1279.24	1267.4	1280.47	1265.85	1282.03	1261.58	1286.3
14	1258.87	6.32397	2003	15-19 years	1254.61	1263.14	1253.56	1264.19	1252.32	1265.43	1250.77	1266.98	1246.48	1271.27
15	1249.89	6.33377	2004	15-19 years	1245.62	1254.16	1244.56	1255.22	1243.33	1256.45	1241.77	1258.01	1237.48	1262.31
16	1253.51	6.32959	2005	15-19 years	1249.24	1257.77	1248.18	1258.83	1246.95	1260.06	1245.39	1261.62	1241.1	1265.91
17	1258.31	6.32421	2006	15-19 years	1254.04	1262.57	1252.99	1263.63	1251.75	1264.86	1250.2	1266.41	1245.91	1270.7
18	1253.15	6.32999	2007	15-19 years	1248.88	1257.41	1247.82	1258.47	1246.59	1259.7	1245.03	1261.26	1240.74	1265.55
19	1246.51	6.33749	2008	15-19 years	1242.24	1250.79	1241.18	1251.84	1239.95	1253.08	1238.39	1254.64	1234.09	1258.94
20	1247.21	6.33681	2009	15-19 years	1242.94	1251.48	1241.88	1252.54	1240.65	1253.78	1239.09	1255.34	1234.79	1259.63
21	1265	6.31712	2010	15-19 years	1260.74	1269.25	1259.68	1270.31	1258.45	1271.54	1256.9	1273.09	1252.61	1277.38
22	1303.58	6.27522	2011	15-19 years	1299.35	1307.81	1298.3	1308.86	1297.08	1310.08	1295.53	1311.62	1291.28	1315.88
23	1353.22	6.2231	2012	15-19 years	1349.02	1357.41	1347.98	1358.45	1346.77	1359.67	1345.24	1361.2	1341.02	1365.42
24	1403.91	6.17186	2013	15-19 years	1399.75	1408.07	1398.72	1409.1	1397.52	1410.31	1396	1411.83	1391.82	1416.01
25	1446.11	6.13063	2014	15-19 years	1441.97	1450.24	1440.95	1451.26	1439.76	1452.46	1438.25	1453.97	1434.09	1458.12
26	1469.84	6.10797	2015	15-19 years	1465.73	1473.96	1464.71	1474.98	1463.52	1476.17	1462.01	1477.67	1457.87	1481.82
27	1449.23	6.12759	2016	15-19 years	1445.1	1453.36	1444.08	1454.39	1442.89	1455.58	1441.38	1457.09	1437.22	1461.24
28	1389.01	6.18666	2017	15-19 years	1384.84	1393.18	1383.8	1394.21	1382.6	1395.42	1381.08	1396.94	1376.88	1401.13
29	1326.84	6.25046	2018	15-19 years	1322.63	1331.05	1321.58	1332.1	1320.37	1333.32	1318.83	1334.85	1314.59	1339.09
30	1300.21	6.27868	2019	15-19 years	1295.98	1304.44	1294.93	1305.49	1293.7	1306.71	1292.16	1308.26	1287.9	1312.51
31	1306.76	6.27153	2020	15-19 years	1302.53	1310.98	1301.48	1312.03	1300.26	1313.25	1298.72	1314.8	1294.46	1319.05
32	1305.39	6.27282	2021	15-19 years	1301.16	1309.62	1300.12	1310.67	1298.89	1311.89	1297.35	1313.43	1293.1	1317.69
33	1292.3	36.5971	2022	15-19 years	1267.63	1316.96	1261.52	1323.07	1254.38	1330.21	1245.38	1339.21	1220.57	1364.03
34	1281.44	43.9742	2023	15-19 years	1251.8	1311.08	1244.46	1318.42	1235.88	1327	1225.06	1337.81	1195.25	1367.63
35	1270.75	52.1377	2024	15-19 years	1235.61	1305.89	1226.9	1314.6	1216.74	1324.77	1203.91	1337.59	1168.56	1372.94
36	1260.25	61.0451	2025	15-19 years	1219.11	1301.39	1208.91	1311.59	1197.01	1323.49	1181.99	1338.51	1140.6	1379.9
37	1249.94	70.635	2026	15-19 years	1202.34	1297.55	1190.54	1309.35	1176.77	1323.12	1159.39	1340.5	1111.5	1388.39
38	1239.85	80.8314	2027	15-19 years	1185.37	1294.33	1171.87	1307.83	1156.11	1323.59	1136.22	1343.47	1081.42	1398.28
39	1229.97	91.5606	2028	15-19 years	1168.26	1291.68	1152.97	1306.97	1135.11	1324.83	1112.59	1347.35	1050.51	1409.43
40	1220.33	102.76	2029	15-19 years	1151.06	1289.59	1133.9	1306.75	1113.87	1326.78	1088.59	1352.06	1018.91	1421.74
41	1210.92	114.383	2030	15-19 years	1133.83	1288.02	1114.73	1307.12	1092.42	1329.42	1064.28	1357.56	986.732	1435.11
42	1201.77	126.393	2031	15-19 years	1116.58	1286.96	1095.48	1308.07	1070.83	1332.72	1039.74	1363.81	954.041	1449.5
43	1192.88	138.766	2032	15-19 years	1099.36	1286.41	1076.18	1309.59	1049.12	1336.65	1014.99	1370.78	920.902	1464.87
44	1184.27	151.487	2033	15-19 years	1082.17	1286.37	1056.87	1311.67	1027.33	1341.21	990.064	1378.48	887.356	1481.18
45	1175.94	164.544	2034	15-19 years	1065.03	1286.84	1037.56	1314.32	1005.47	1346.41	964.992	1386.88	853.43	1498.44
46	1167.9	177.935	2035	15-19 years	1047.97	1287.82	1018.25	1317.54	983.557	1352.24	939.785	1396.01	819.145	1516.65
47	3725.77	4.86197	1990	20-24 years	3722.49	3729.04	3721.68	3729.85	3720.73	3730.8	3719.53	3732	3716.24	3735.3
48	3765.41	4.84763	1991	20-24 years	3762.14	3768.68	3761.33	3769.49	3760.39	3770.43	3759.2	3771.63	3755.91	3774.91
49	3812.62	4.83109	1992	20-24 years	3809.36	3815.88	3808.56	3816.68	3807.61	3817.62	3806.43	3818.81	3803.15	3822.09
50	3862.88	4.81394	1993	20-24 years	3859.63	3866.12	3858.83	3866.92	3857.89	3867.86	3856.7	3869.05	3853.44	3872.31
51	3917.14	4.79594	1994	20-24 years	3913.91	3920.38	3913.11	3921.18	3912.18	3922.11	3911	3923.29	3907.74	3926.54
52	3980.64	4.77541	1995	20-24 years	3977.42	3983.86	3976.62	3984.66	3975.69	3985.59	3974.52	3986.76	3971.28	3990
53	4053.15	4.75255	1996	20-24 years	4049.94	4056.35	4049.15	4057.14	4048.22	4058.07	4047.05	4059.24	4043.83	4062.46
54	4128.41	4.72934	1997	20-24 years	4125.23	4131.6	4124.44	4132.39	4123.51	4133.31	4122.35	4134.48	4119.14	4137.68
55	4202.07	4.70692	1998	20-24 years	4198.9	4205.24	4198.11	4206.03	4197.19	4206.95	4196.04	4208.11	4192.85	4211.3
56	4268.86	4.68659	1999	20-24 years	4265.7	4272.02	4264.92	4272.8	4264	4273.71	4262.85	4274.87	4259.67	4278.04
57	4327.79	4.66848	2000	20-24 years	4324.65	4330.94	4323.87	4331.72	4322.96	4332.63	4321.81	4333.78	4318.64	4336.94
58	4354.71	4.65956	2001	20-24 years	4351.57	4357.85	4350.79	4358.63	4349.89	4359.54	4348.74	4360.69	4345.58	4363.85
59	4337.97	4.66307	2002	20-24 years	4334.82	4341.11	4334.04	4341.89	4333.13	4342.8	4331.99	4343.94	4328.83	4347.11
60	4298.82	4.67298	2003	20-24 years	4295.67	4301.97	4294.89	4302.75	4293.97	4303.66	4292.83	4304.81	4289.66	4307.98
61	4261.32	4.6824	2004	20-24 years	4258.16	4264.47	4257.38	4265.26	4256.47	4266.17	4255.32	4267.32	4252.14	4270.5
62	4248.79	4.68434	2005	20-24 years	4245.63	4251.95	4244.85	4252.73	4243.94	4253.64	4242.78	4254.79	4239.61	4257.97
63	4215.03	4.69257	2006	20-24 years	4211.87	4218.2	4211.09	4218.98	4210.17	4219.9	4209.02	4221.05	4205.84	4224.23
64	4128.01	4.71741	2007	20-24 years	4124.83	4131.19	4124.04	4131.98	4123.12	4132.9	4121.96	4134.06	4118.76	4137.26
65	4027.82	4.7474	2008	20-24 years	4024.62	4031.02	4023.83	4031.82	4022.91	4032.74	4021.74	4033.91	4018.52	4037.13
66	3954.81	4.76983	2009	20-24 years	3951.6	3958.03	3950.8	3958.82	3949.87	3959.75	3948.7	3960.93	3945.46	3964.16
67	3951.72	4.77019	2010	20-24 years	3948.5	3954.93	3947.71	3955.73	3946.78	3956.66	3945.6	3957.83	3942.37	3961.07
68	4031.21	4.74434	2011	20-24 years	4028.01	4034.4	4027.22	4035.2	4026.29	4036.12	4025.12	4037.29	4021.91	4040.51
69	4154.87	4.70567	2012	20-24 years	4151.7	4158.04	4150.91	4158.83	4150	4159.75	4148.84	4160.9	4145.65	4164.1
70	4295.73	4.66343	2013	20-24 years	4292.58	4298.87	4291.81	4299.65	4290.9	4300.56	4289.75	4301.71	4286.59	4304.87
71	4427.43	4.62556	2014	20-24 years	4424.32	4430.55	4423.54	4431.32	4422.64	4432.23	4421.5	4433.36	4418.37	4436.5
72	4523.55	4.59894	2015	20-24 years	4520.45	4526.65	4519.68	4527.42	4518.78	4528.31	4517.65	4529.44	4514.54	4532.56
73	4518.06	4.60089	2016	20-24 years	4514.96	4521.16	4514.19	4521.93	4513.29	4522.83	4512.16	4523.96	4509.04	4527.08
74	4416.29	4.62999	2017	20-24 years	4413.17	4419.41	4412.4	4420.18	4411.49	4421.09	4410.35	4422.22	4407.21	4425.36
75	4301.69	4.66352	2018	20-24 years	4298.55	4304.84	4297.77	4305.62	4296.86	4306.53	4295.72	4307.67	4292.55	4310.83
76	4264.43	4.67461	2019	20-24 years	4261.28	4267.58	4260.5	4268.36	4259.59	4269.27	4258.44	4270.42	4255.27	4273.59
77	4299.74	4.66397	2020	20-24 years	4296.6	4302.89	4295.82	4303.67	4294.91	4304.58	4293.76	4305.72	4290.6	4308.89
78	4309.55	4.6609	2021	20-24 years	4306.41	4312.69	4305.63	4313.47	4304.72	4314.38	4303.58	4315.53	4300.42	4318.69
79	4442.18	103.714	2022	20-24 years	4372.27	4512.08	4354.95	4529.4	4334.73	4549.62	4309.21	4575.14	4238.9	4645.46
80	4407.71	116.372	2023	20-24 years	4329.27	4486.14	4309.84	4505.58	4287.14	4528.27	4258.52	4556.9	4179.62	4635.8
81	4369.89	128.366	2024	20-24 years	4283.37	4456.41	4261.94	4477.85	4236.91	4502.88	4205.33	4534.46	4118.3	4621.49
82	4332.4	140.561	2025	20-24 years	4237.66	4427.14	4214.19	4450.61	4186.78	4478.02	4152.2	4512.6	4056.9	4607.9
83	4295.72	154.107	2026	20-24 years	4191.85	4399.59	4166.12	4425.32	4136.06	4455.37	4098.15	4493.29	3993.67	4597.77
84	4259.51	170.181	2027	20-24 years	4144.81	4374.21	4116.39	4402.63	4083.2	4435.82	4041.34	4477.68	3925.96	4593.06
85	4223.82	189.179	2028	20-24 years	4096.31	4351.32	4064.72	4382.92	4027.83	4419.81	3981.29	4466.35	3853.03	4594.61
86	4188.69	211.198	2029	20-24 years	4046.34	4331.04	4011.07	4366.31	3969.89	4407.49	3917.93	4459.44	3774.74	4602.64
87	4154.16	236.117	2030	20-24 years	3995.02	4313.31	3955.59	4352.74	3909.55	4398.78	3851.46	4456.87	3691.38	4616.95
88	4120.29	263.71	2031	20-24 years	3942.55	4298.03	3898.51	4342.07	3847.08	4393.49	3782.21	4458.36	3603.42	4637.16
89	4087.1	293.725	2032	20-24 years	3889.13	4285.07	3840.07	4334.12	3782.8	4391.39	3710.54	4463.65	3511.4	4662.8
90	4054.63	325.92	2033	20-24 years	3834.96	4274.3	3780.53	4328.73	3716.98	4392.28	3636.8	4472.46	3415.83	4693.43
91	4022.92	360.085	2034	20-24 years	3780.23	4265.62	3720.09	4325.75	3649.88	4395.97	3561.29	4484.55	3317.16	4728.69
92	3992.01	396.04	2035	20-24 years	3725.08	4258.95	3658.94	4325.08	3581.72	4402.31	3484.29	4499.74	3215.78	4768.25
93	7923.56	3.99011	1990	25-29 years	7920.88	7926.25	7920.21	7926.92	7919.43	7927.7	7918.45	7928.68	7915.74	7931.38
94	7905.6	3.98601	1991	25-29 years	7902.91	7908.28	7902.25	7908.95	7901.47	7909.73	7900.49	7910.71	7897.79	7913.41
95	7903.26	3.98112	1992	25-29 years	7900.57	7905.94	7899.91	7906.61	7899.13	7907.38	7898.15	7908.36	7895.45	7911.06
96	7931.6	3.97388	1993	25-29 years	7928.92	7934.28	7928.26	7934.94	7927.48	7935.72	7926.5	7936.69	7923.81	7939.39
97	7981.26	3.96495	1994	25-29 years	7978.59	7983.94	7977.93	7984.6	7977.16	7985.37	7976.18	7986.35	7973.49	7989.04
98	8046.33	3.95463	1995	25-29 years	8043.67	8049	8043.01	8049.66	8042.24	8050.43	8041.26	8051.4	8038.58	8054.08
99	8119.12	3.94336	1996	25-29 years	8116.46	8121.77	8115.8	8122.43	8115.03	8123.2	8114.06	8124.17	8111.39	8126.84
100	8201.05	3.93139	1997	25-29 years	8198.4	8203.7	8197.75	8204.36	8196.98	8205.13	8196.01	8206.09	8193.35	8208.76
101	8285.97	3.91947	1998	25-29 years	8283.33	8288.61	8282.68	8289.27	8281.91	8290.03	8280.95	8291	8278.29	8293.65
102	8381.8	3.90675	1999	25-29 years	8379.17	8384.43	8378.51	8385.09	8377.75	8385.85	8376.79	8386.81	8374.14	8389.46
103	8495.37	3.89255	2000	25-29 years	8492.75	8497.99	8492.1	8498.64	8491.34	8499.4	8490.38	8500.36	8487.74	8503
104	8589.36	3.88138	2001	25-29 years	8586.74	8591.97	8586.09	8592.62	8585.34	8593.38	8584.38	8594.33	8581.75	8596.96
105	8632.8	3.87637	2002	25-29 years	8630.19	8635.41	8629.54	8636.06	8628.78	8636.82	8627.83	8637.77	8625.2	8640.4
106	8644.55	3.87466	2003	25-29 years	8641.93	8647.16	8641.29	8647.8	8640.53	8648.56	8639.58	8649.51	8636.95	8652.14
107	8649.89	3.87279	2004	25-29 years	8647.28	8652.5	8646.63	8653.15	8645.88	8653.9	8644.93	8654.86	8642.3	8657.48
108	8692.47	3.86557	2005	25-29 years	8689.87	8695.08	8689.22	8695.72	8688.47	8696.48	8687.52	8697.43	8684.9	8700.05
109	8701.13	3.86171	2006	25-29 years	8698.53	8703.74	8697.89	8704.38	8697.13	8705.13	8696.18	8706.08	8693.56	8708.7
110	8609.33	3.86921	2007	25-29 years	8606.72	8611.94	8606.08	8612.59	8605.32	8613.34	8604.37	8614.29	8601.75	8616.92
111	8472.78	3.88188	2008	25-29 years	8470.17	8475.4	8469.52	8476.05	8468.76	8476.81	8467.81	8477.76	8465.18	8480.39
112	8350.96	3.89287	2009	25-29 years	8348.34	8353.59	8347.69	8354.24	8346.93	8354.99	8345.97	8355.95	8343.33	8358.59
113	8307.14	3.89418	2010	25-29 years	8304.52	8309.77	8303.87	8310.42	8303.11	8311.18	8302.15	8312.14	8299.51	8314.78
114	8348.86	3.88443	2011	25-29 years	8346.25	8351.48	8345.6	8352.13	8344.84	8352.89	8343.88	8353.84	8341.25	8356.48
115	8433.27	3.86941	2012	25-29 years	8430.67	8435.88	8430.02	8436.53	8429.27	8437.28	8428.31	8438.23	8425.69	8440.86
116	8543.62	3.85188	2013	25-29 years	8541.03	8546.22	8540.38	8546.86	8539.63	8547.61	8538.68	8548.56	8536.07	8551.17
117	8653.24	3.83559	2014	25-29 years	8650.65	8655.82	8650.01	8656.46	8649.26	8657.21	8648.32	8658.15	8645.72	8660.76
118	8730.94	3.82452	2015	25-29 years	8728.36	8733.52	8727.73	8734.16	8726.98	8734.9	8726.04	8735.85	8723.45	8738.44
119	8739.52	3.82326	2016	25-29 years	8736.95	8742.1	8736.31	8742.74	8735.56	8743.48	8734.62	8744.43	8732.03	8747.02
120	8697.41	3.82913	2017	25-29 years	8694.83	8699.99	8694.19	8700.63	8693.44	8701.38	8692.5	8702.32	8689.91	8704.92
121	8667.25	3.83412	2018	25-29 years	8664.67	8669.84	8664.03	8670.48	8663.28	8671.22	8662.34	8672.17	8659.74	8674.77
122	8715.82	3.82976	2019	25-29 years	8713.24	8718.41	8712.6	8719.05	8711.86	8719.79	8710.91	8720.73	8708.32	8723.33
123	8829.11	3.81768	2020	25-29 years	8826.54	8831.68	8825.9	8832.32	8825.16	8833.07	8824.22	8834	8821.63	8836.59
124	8912.11	3.80882	2021	25-29 years	8909.54	8914.67	8908.9	8915.31	8908.16	8916.05	8907.22	8916.99	8904.64	8919.57
125	9201.58	212.375	2022	25-29 years	9058.44	9344.72	9022.98	9380.19	8981.56	9421.6	8929.32	9473.85	8785.33	9617.84
126	9252.13	241.223	2023	25-29 years	9089.55	9414.72	9049.26	9455	9002.22	9502.04	8942.88	9561.38	8779.33	9724.93
127	9278.49	267.968	2024	25-29 years	9097.88	9459.1	9053.13	9503.85	9000.88	9556.11	8934.96	9622.03	8753.27	9803.71
128	9278.98	292.867	2025	25-29 years	9081.59	9476.37	9032.68	9525.28	8975.57	9582.39	8903.53	9654.44	8704.96	9853
129	9251.61	316.07	2026	25-29 years	9038.58	9464.64	8985.8	9517.43	8924.16	9579.06	8846.41	9656.81	8632.11	9871.11
130	9199.24	337.787	2027	25-29 years	8971.57	9426.91	8915.16	9483.32	8849.3	9549.19	8766.2	9632.29	8537.18	9861.3
131	9128.04	358.061	2028	25-29 years	8886.71	9369.38	8826.91	9429.17	8757.09	9498.99	8669.01	9587.08	8426.24	9829.84
132	9049.91	377.719	2029	25-29 years	8795.33	9304.5	8732.25	9367.58	8658.6	9441.23	8565.68	9534.15	8309.58	9790.24
133	8972.45	398.142	2030	25-29 years	8704.1	9240.8	8637.61	9307.29	8559.97	9384.92	8462.03	9482.87	8192.09	9752.81
134	8896.65	421.222	2031	25-29 years	8612.75	9180.56	8542.41	9250.9	8460.27	9333.04	8356.65	9436.66	8071.06	9722.25
135	8821.83	449.03	2032	25-29 years	8519.19	9124.48	8444.2	9199.47	8356.64	9287.03	8246.18	9397.49	7941.74	9701.93
136	8748.09	482.452	2033	25-29 years	8422.91	9073.26	8342.34	9153.83	8248.27	9247.91	8129.58	9366.59	7802.48	9693.69
137	8675.5	521.889	2034	25-29 years	8323.75	9027.26	8236.59	9114.41	8134.83	9216.18	8006.44	9344.56	7652.6	9698.4
138	8604.17	567.357	2035	25-29 years	8221.77	8986.57	8127.02	9081.32	8016.39	9191.95	7876.82	9331.52	7492.15	9716.19
139	12864.3	3.62707	1990	30-34 years	12861.9	12866.8	12861.3	12867.4	12860.6	12868.1	12859.7	12869	12857.2	12871.4
140	12904.8	3.61904	1991	30-34 years	12902.4	12907.2	12901.8	12907.9	12901.1	12908.6	12900.2	12909.4	12897.7	12911.9
141	12910.5	3.6092	1992	30-34 years	12908.1	12912.9	12907.5	12913.5	12906.8	12914.2	12905.9	12915.1	12903.4	12917.6
142	12851.2	3.59867	1993	30-34 years	12848.7	12853.6	12848.1	12854.2	12847.4	12854.9	12846.6	12855.8	12844.1	12858.2
143	12751.5	3.58934	1994	30-34 years	12749.1	12754	12748.5	12754.6	12747.8	12755.3	12746.9	12756.2	12744.5	12758.6
144	12653.7	3.58135	1995	30-34 years	12651.3	12656.1	12650.7	12656.7	12650	12657.4	12649.1	12658.3	12646.7	12660.7
145	12602.1	3.57339	1996	30-34 years	12599.7	12604.5	12599.1	12605.1	12598.4	12605.8	12597.5	12606.6	12595.1	12609.1
146	12603.4	3.56465	1997	30-34 years	12601	12605.8	12600.4	12606.4	12599.7	12607.1	12598.9	12608	12596.5	12610.4
147	12664.1	3.55529	1998	30-34 years	12661.7	12666.5	12661.2	12667.1	12660.5	12667.8	12659.6	12668.7	12657.2	12671.1
148	12755.8	3.54579	1999	30-34 years	12753.4	12758.2	12752.8	12758.8	12752.1	12759.4	12751.2	12760.3	12748.8	12762.7
149	12853.6	3.53668	2000	30-34 years	12851.3	12856	12850.7	12856.6	12850	12857.3	12849.1	12858.2	12846.7	12860.6
150	12914.5	3.52935	2001	30-34 years	12912.1	12916.8	12911.5	12917.4	12910.8	12918.1	12909.9	12919	12907.5	12921.4
151	12942.4	3.52433	2002	30-34 years	12940.1	12944.8	12939.5	12945.4	12938.8	12946.1	12937.9	12947	12935.5	12949.4
152	12958.4	3.52048	2003	30-34 years	12956	12960.8	12955.4	12961.4	12954.8	12962	12953.9	12962.9	12951.5	12965.3
153	12995.5	3.51616	2004	30-34 years	12993.1	12997.9	12992.6	12998.5	12991.9	12999.2	12991	13000	12988.6	13002.4
154	13086.1	3.50969	2005	30-34 years	13083.7	13088.4	13083.1	13089	13082.4	13089.7	13081.6	13090.6	13079.2	13092.9
155	13126.7	3.50685	2006	30-34 years	13124.4	13129.1	13123.8	13129.7	13123.1	13130.4	13122.3	13131.2	13119.9	13133.6
156	13044	3.51115	2007	30-34 years	13041.6	13046.4	13041.1	13047	13040.4	13047.7	13039.5	13048.5	13037.1	13050.9
157	12920.8	3.51712	2008	30-34 years	12918.5	12923.2	12917.9	12923.8	12917.2	12924.5	12916.3	12925.4	12913.9	12927.7
158	12832.8	3.51979	2009	30-34 years	12830.4	12835.1	12829.8	12835.7	12829.1	12836.4	12828.3	12837.3	12825.9	12839.7
159	12866.5	3.51412	2010	30-34 years	12864.2	12868.9	12863.6	12869.5	12862.9	12870.2	12862	12871	12859.7	12873.4
160	13047.4	3.49923	2011	30-34 years	13045	13049.8	13044.5	13050.3	13043.8	13051	13042.9	13051.9	13040.5	13054.3
161	13292.5	3.4801	2012	30-34 years	13290.2	13294.8	13289.6	13295.4	13288.9	13296.1	13288	13297	13285.7	13299.3
162	13537.3	3.46041	2013	30-34 years	13535	13539.7	13534.4	13540.3	13533.8	13540.9	13532.9	13541.8	13530.6	13544.1
163	13731.6	3.44294	2014	30-34 years	13729.3	13733.9	13728.7	13734.5	13728	13735.2	13727.2	13736	13724.9	13738.4
164	13823.5	3.43031	2015	30-34 years	13821.2	13825.8	13820.6	13826.4	13820	13827.1	13819.1	13827.9	13816.8	13830.2
165	13800.3	3.42315	2016	30-34 years	13798	13802.6	13797.4	13803.2	13796.8	13803.9	13795.9	13804.7	13793.6	13807
166	13728.5	3.41903	2017	30-34 years	13726.2	13730.9	13725.7	13731.4	13725	13732.1	13724.2	13732.9	13721.8	13735.2
167	13662.1	3.41601	2018	30-34 years	13659.8	13664.4	13659.2	13664.9	13658.5	13665.6	13657.7	13666.4	13655.4	13668.8
168	13650.4	3.41174	2019	30-34 years	13648.1	13652.7	13647.6	13653.3	13646.9	13654	13646.1	13654.8	13643.8	13657.1
169	13687.8	3.40686	2020	30-34 years	13685.5	13690.1	13684.9	13690.6	13684.2	13691.3	13683.4	13692.1	13681.1	13694.4
170	13751.5	3.403	2021	30-34 years	13749.2	13753.8	13748.6	13754.3	13747.9	13755	13747.1	13755.8	13744.8	13758.1
171	13840.2	317.298	2022	30-34 years	13626.3	14054	13573.3	14107	13511.5	14168.9	13433.4	14246.9	13218.3	14462.1
172	13968	361.725	2023	30-34 years	13724.2	14211.8	13663.8	14272.3	13593.3	14342.8	13504.3	14431.8	13259.1	14677
173	14115.3	405.009	2024	30-34 years	13842.3	14388.3	13774.7	14455.9	13695.7	14534.9	13596.1	14634.5	13321.5	14909.1
174	14267.6	447.589	2025	30-34 years	13966	14569.3	13891.2	14644.1	13803.9	14731.3	13693.8	14841.5	13390.4	15144.9
175	14408.5	489.513	2026	30-34 years	14078.5	14738.4	13996.8	14820.2	13901.3	14915.6	13780.9	15036	13449	15367.9
176	14524.3	530.54	2027	30-34 years	14166.7	14881.9	14078.1	14970.5	13974.7	15073.9	13844.1	15204.4	13484.4	15564.1
177	14604.4	569.78	2028	30-34 years	14220.3	14988.4	14125.2	15083.6	14014.1	15194.7	13873.9	15334.8	13487.6	15721.1
178	14646.3	606.942	2029	30-34 years	14237.2	15055.4	14135.8	15156.7	14017.5	15275.1	13868.2	15424.4	13456.7	15835.9
179	14647.4	641.873	2030	30-34 years	14214.7	15080	14107.5	15187.2	13982.4	15312.3	13824.5	15470.2	13389.3	15905.4
180	14604.5	674.421	2031	30-34 years	14149.9	15059	14037.3	15171.6	13905.8	15303.2	13739.8	15469.1	13282.6	15926.3
181	14522.1	704.745	2032	30-34 years	14047.1	14997.1	13929.4	15114.8	13792	15252.2	13618.6	15425.6	13140.8	15903.4
182	14410	732.931	2033	30-34 years	13916	14904	13793.6	15026.4	13650.7	15169.3	13470.4	15349.6	12973.4	15846.5
183	14286.9	760.267	2034	30-34 years	13774.5	14799.4	13647.6	14926.3	13499.3	15074.6	13312.3	15261.6	12796.8	15777.1
184	14164.9	788.69	2035	30-34 years	13633.4	14696.5	13501.7	14828.2	13347.9	14982	13153.8	15176	12619.1	15710.8
185	18115.6	3.5388	1990	35-39 years	18113.2	18118	18112.6	18118.6	18111.9	18119.2	18111	18120.1	18108.6	18122.5
186	17853.6	3.52396	1991	35-39 years	17851.3	17856	17850.7	17856.6	17850	17857.3	17849.1	17858.2	17846.7	17860.6
187	17651.5	3.51272	1992	35-39 years	17649.2	17653.9	17648.6	17654.5	17647.9	17655.2	17647	17656	17644.6	17658.4
188	17552.6	3.50518	1993	35-39 years	17550.2	17555	17549.6	17555.5	17549	17556.2	17548.1	17557.1	17545.7	17559.5
189	17565.2	3.49936	1994	35-39 years	17562.9	17567.6	17562.3	17568.2	17561.6	17568.9	17560.7	17569.7	17558.4	17572.1
190	17660.7	3.49258	1995	35-39 years	17658.4	17663.1	17657.8	17663.6	17657.1	17664.3	17656.2	17665.2	17653.9	17667.5
191	17763.4	3.48221	1996	35-39 years	17761	17765.7	17760.5	17766.3	17759.8	17767	17758.9	17767.9	17756.6	17770.2
192	17803.4	3.46731	1997	35-39 years	17801	17805.7	17800.5	17806.3	17799.8	17807	17798.9	17807.8	17796.6	17810.2
193	17750	3.44796	1998	35-39 years	17747.7	17752.3	17747.1	17752.9	17746.4	17753.6	17745.6	17754.4	17743.3	17756.8
194	17644.5	3.42798	1999	35-39 years	17642.2	17646.8	17641.6	17647.4	17641	17648.1	17640.1	17648.9	17637.8	17651.2
195	17528	3.4102	2000	35-39 years	17525.7	17530.3	17525.1	17530.8	17524.4	17531.5	17523.6	17532.3	17521.3	17534.7
196	17450.1	3.39562	2001	35-39 years	17447.8	17452.4	17447.2	17452.9	17446.6	17453.6	17445.7	17454.4	17443.4	17456.7
197	17441.5	3.38281	2002	35-39 years	17439.3	17443.8	17438.7	17444.4	17438	17445.1	17437.2	17445.9	17434.9	17448.2
198	17508.7	3.37228	2003	35-39 years	17506.4	17510.9	17505.8	17511.5	17505.2	17512.1	17504.3	17513	17502	17515.3
199	17603.1	3.36335	2004	35-39 years	17600.8	17605.4	17600.3	17605.9	17599.6	17606.6	17598.8	17607.4	17596.5	17609.7
200	17687.9	3.35562	2005	35-39 years	17685.6	17690.1	17685.1	17690.7	17684.4	17691.4	17683.6	17692.2	17681.3	17694.5
201	17610.4	3.35121	2006	35-39 years	17608.1	17612.6	17607.5	17613.2	17606.9	17613.8	17606.1	17614.7	17603.8	17616.9
202	17357	3.35208	2007	35-39 years	17354.8	17359.3	17354.2	17359.9	17353.6	17360.5	17352.8	17361.3	17350.5	17363.6
203	17052.3	3.35556	2008	35-39 years	17050.1	17054.6	17049.5	17055.2	17048.9	17055.8	17048	17056.6	17045.8	17058.9
204	16837.8	3.35814	2009	35-39 years	16835.6	16840.1	16835	16840.6	16834.3	16841.3	16833.5	16842.1	16831.2	16844.4
205	16855.9	3.35561	2010	35-39 years	16853.6	16858.2	16853.1	16858.7	16852.4	16859.4	16851.6	16860.2	16849.3	16862.5
206	17175.2	3.34597	2011	35-39 years	17172.9	17177.4	17172.3	17178	17171.7	17178.6	17170.9	17179.4	17168.6	17181.7
207	17658.8	3.33308	2012	35-39 years	17656.5	17661	17656	17661.6	17655.3	17662.2	17654.5	17663	17652.2	17665.3
208	18161.8	3.32004	2013	35-39 years	18159.5	18164	18159	18164.6	18158.3	18165.2	18157.5	18166	18155.3	18168.3
209	18564.7	3.30814	2014	35-39 years	18562.5	18567	18561.9	18567.5	18561.3	18568.2	18560.5	18569	18558.2	18571.2
210	18786	3.29805	2015	35-39 years	18783.8	18788.2	18783.2	18788.8	18782.6	18789.4	18781.8	18790.2	18779.6	18792.5
211	18880.3	3.28927	2016	35-39 years	18878.1	18882.6	18877.6	18883.1	18876.9	18883.8	18876.1	18884.6	18873.9	18886.8
212	18954.5	3.27975	2017	35-39 years	18952.3	18956.7	18951.8	18957.3	18951.1	18957.9	18950.3	18958.7	18948.1	18960.9
213	19012	3.26923	2018	35-39 years	19009.8	19014.2	19009.2	19014.7	19008.6	19015.4	19007.8	19016.2	19005.6	19018.4
214	19061.3	3.25775	2019	35-39 years	19059.1	19063.5	19058.5	19064	19057.9	19064.6	19057.1	19065.4	19054.9	19067.6
215	19070	3.24623	2020	35-39 years	19067.8	19072.2	19067.3	19072.8	19066.7	19073.4	19065.9	19074.2	19063.7	19076.4
216	19052.2	3.23439	2021	35-39 years	19050.1	19054.4	19049.5	19055	19048.9	19055.6	19048.1	19056.4	19045.9	19058.6
217	18919.3	432.296	2022	35-39 years	18627.9	19210.7	18555.7	19282.8	18471.4	19367.1	18365.1	19473.5	18072	19766.6
218	18859.2	487.058	2023	35-39 years	18530.9	19187.5	18449.6	19268.8	18354.6	19363.8	18234.8	19483.6	17904.6	19813.8
219	18834.6	539.16	2024	35-39 years	18471.2	19198	18381.1	19288	18276	19393.1	18143.4	19525.8	17777.8	19891.3
220	18862.2	590.345	2025	35-39 years	18464.3	19260.1	18365.7	19358.7	18250.6	19473.8	18105.4	19619	17705.1	20019.2
221	18946.5	641.991	2026	35-39 years	18513.8	19379.2	18406.6	19486.4	18281.4	19611.6	18123.5	19769.5	17688.2	20204.8
222	19082	694.933	2027	35-39 years	18613.6	19550.4	18497.6	19666.4	18362.1	19802	18191.1	19972.9	17719.9	20444.1
223	19258.7	748.983	2028	35-39 years	18753.9	19763.5	18628.8	19888.6	18482.8	20034.6	18298.5	20218.9	17790.7	20726.7
224	19462.1	803.959	2029	35-39 years	18920.3	20004	18786	20138.3	18629.2	20295	18431.5	20492.8	17886.4	21037.9
225	19672.6	859.485	2030	35-39 years	19093.3	20251.9	18949.8	20395.4	18782.2	20563	18570.7	20774.5	17988	21357.2
226	19867.2	914.882	2031	35-39 years	19250.6	20483.8	19097.8	20636.6	18919.4	20815	18694.3	21040.1	18074	21660.4
227	20027.3	969.343	2032	35-39 years	19374	20680.6	19212.1	20842.5	19023.1	21031.5	18784.6	21270	18127.4	21927.2
228	20138.2	1021.43	2033	35-39 years	19449.7	20826.6	19279.1	20997.2	19079.9	21196.4	18828.7	21447.6	18136.1	22140.2
229	20196.4	1070.59	2034	35-39 years	19474.8	20917.9	19296	21096.7	19087.2	21305.5	18823.9	21568.9	18098	22294.7
230	20198.3	1116.42	2035	35-39 years	19445.8	20950.7	19259.4	21137.2	19041.6	21354.9	18767	21629.5	18010.1	22386.5
231	23706.4	3.75289	1990	40-44 years	23703.9	23709	23703.3	23709.6	23702.6	23710.3	23701.6	23711.3	23699.1	23713.8
232	23318.1	3.69542	1991	40-44 years	23315.6	23320.6	23315	23321.2	23314.3	23322	23313.4	23322.9	23310.9	23325.4
233	22981.6	3.65678	1992	40-44 years	22979.1	22984.1	22978.5	22984.7	22977.8	22985.4	22976.9	22986.3	22974.4	22988.8
234	22661.4	3.61837	1993	40-44 years	22658.9	22663.8	22658.3	22664.4	22657.6	22665.1	22656.7	22666	22654.3	22668.5
235	22446.6	3.59019	1994	40-44 years	22444.2	22449	22443.6	22449.6	22442.9	22450.3	22442	22451.2	22439.6	22453.7
236	22249	3.55426	1995	40-44 years	22246.6	22251.4	22246	22252	22245.3	22252.7	22244.4	22253.5	22242	22256
237	22158.9	3.5337	1996	40-44 years	22156.5	22161.2	22155.9	22161.8	22155.2	22162.5	22154.3	22163.4	22151.9	22165.8
238	22136.4	3.51758	1997	40-44 years	22134	22138.8	22133.4	22139.4	22132.8	22140	22131.9	22140.9	22129.5	22143.3
239	22200.1	3.50726	1998	40-44 years	22197.7	22202.4	22197.1	22203	22196.4	22203.7	22195.6	22204.6	22193.2	22206.9
240	22328.2	3.50069	1999	40-44 years	22325.8	22330.5	22325.2	22331.1	22324.5	22331.8	22323.7	22332.6	22321.3	22335
241	22477.5	3.49398	2000	40-44 years	22475.2	22479.9	22474.6	22480.4	22473.9	22481.1	22473	22482	22470.7	22484.4
242	22591.4	3.48218	2001	40-44 years	22589.1	22593.8	22588.5	22594.4	22587.8	22595	22587	22595.9	22584.6	22598.3
243	22629.1	3.46281	2002	40-44 years	22626.7	22631.4	22626.1	22632	22625.5	22632.6	22624.6	22633.5	22622.3	22635.8
244	22609.2	3.43539	2003	40-44 years	22606.9	22611.5	22606.3	22612.1	22605.6	22612.7	22604.8	22613.6	22602.4	22615.9
245	22591.3	3.40556	2004	40-44 years	22589	22593.6	22588.5	22594.2	22587.8	22594.9	22587	22595.7	22584.7	22598
246	22567.2	3.37787	2005	40-44 years	22564.9	22569.5	22564.4	22570.1	22563.7	22570.7	22562.9	22571.6	22560.6	22573.8
247	22362.4	3.35572	2006	40-44 years	22360.1	22364.7	22359.6	22365.2	22358.9	22365.9	22358.1	22366.7	22355.8	22369
248	21911	3.3394	2007	40-44 years	21908.8	21913.3	21908.2	21913.9	21907.6	21914.5	21906.8	21915.3	21904.5	21917.6
249	21403.1	3.33001	2008	40-44 years	21400.8	21405.3	21400.3	21405.9	21399.6	21406.5	21398.8	21407.4	21396.6	21409.6
250	21015.9	3.3239	2009	40-44 years	21013.7	21018.2	21013.1	21018.7	21012.5	21019.4	21011.6	21020.2	21009.4	21022.4
251	20920.2	3.31725	2010	40-44 years	20918	20922.4	20917.4	20923	20916.8	20923.6	20916	20924.5	20913.7	20926.7
252	21234.6	3.30643	2011	40-44 years	21232.4	21236.9	21231.8	21237.4	21231.2	21238.1	21230.4	21238.9	21228.1	21241.1
253	21841.9	3.29451	2012	40-44 years	21839.7	21844.1	21839.1	21844.7	21838.5	21845.3	21837.7	21846.1	21835.5	21848.4
254	22528.5	3.28399	2013	40-44 years	22526.3	22530.7	22525.8	22531.3	22525.1	22531.9	22524.3	22532.7	22522.1	22535
255	23109.2	3.27652	2014	40-44 years	23107	23111.4	23106.4	23111.9	23105.8	23112.6	23105	23113.4	23102.8	23115.6
256	23413.9	3.27253	2015	40-44 years	23411.7	23416.1	23411.1	23416.6	23410.5	23417.3	23409.7	23418.1	23407.5	23420.3
257	23531.7	3.27115	2016	40-44 years	23529.5	23533.9	23528.9	23534.4	23528.3	23535	23527.5	23535.8	23525.2	23538.1
258	23647.3	3.27043	2017	40-44 years	23645.1	23649.5	23644.5	23650	23643.9	23650.7	23643.1	23651.5	23640.9	23653.7
259	23759.1	3.26858	2018	40-44 years	23756.9	23761.3	23756.4	23761.9	23755.7	23762.5	23754.9	23763.3	23752.7	23765.5
260	23857.2	3.26395	2019	40-44 years	23855	23859.4	23854.5	23860	23853.8	23860.6	23853	23861.4	23850.8	23863.6
261	23897	3.25636	2020	40-44 years	23894.8	23899.2	23894.2	23899.7	23893.6	23900.3	23892.8	23901.1	23890.6	23903.4
262	23936.7	3.24723	2021	40-44 years	23934.5	23938.9	23934	23939.4	23933.4	23940.1	23932.6	23940.9	23930.4	23943.1
263	24342	555.152	2022	40-44 years	23967.9	24716.2	23875.2	24808.9	23766.9	24917.2	23630.3	25053.7	23253.9	25430.1
264	24400.8	628.983	2023	40-44 years	23976.8	24824.7	23871.8	24929.7	23749.1	25052.4	23594.4	25207.1	23167.9	25633.6
265	24406.7	697.301	2024	40-44 years	23936.8	24876.7	23820.3	24993.2	23684.3	25129.1	23512.8	25300.7	23040	25773.5
266	24366.7	761.154	2025	40-44 years	23853.7	24879.7	23726.5	25006.8	23578.1	25155.2	23390.9	25342.5	22874.8	25858.5
267	24291.4	821.594	2026	40-44 years	23737.6	24845.1	23600.4	24982.3	23440.2	25142.6	23238.1	25344.7	22681.1	25901.7
268	24200.3	879.842	2027	40-44 years	23607.3	24793.3	23460.3	24940.2	23288.8	25111.8	23072.3	25328.2	22475.8	25924.8
269	24123.9	936.813	2028	40-44 years	23492.5	24755.3	23336.1	24911.8	23153.4	25094.5	22922.9	25324.9	22287.8	25960.1
270	24092.9	993.967	2029	40-44 years	23423	24762.8	23257	24928.8	23063.2	25122.7	22818.6	25367.2	22144.7	26041.1
271	24128.7	1052.81	2030	40-44 years	23419.1	24838.3	23243.3	25014.2	23038	25219.5	22779	25478.4	22065.2	26192.3
272	24237.1	1114.49	2031	40-44 years	23486	24988.3	23299.8	25174.4	23082.5	25391.7	22808.3	25665.9	22052.7	26421.5
273	24411	1179.54	2032	40-44 years	23616	25206	23419	25403	23189	25633	22898.8	25923.1	22099.1	26722.9
274	24637.5	1247.39	2033	40-44 years	23796.8	25478.3	23588.5	25686.6	23345.2	25929.8	23038.4	26236.7	22192.6	27082.4
275	24898.3	1317.41	2034	40-44 years	24010.4	25786.2	23790.4	26006.2	23533.5	26263.1	23209.4	26587.2	22316.2	27480.4
276	25168.1	1388.66	2035	40-44 years	24232.1	26104	24000.2	26335.9	23729.4	26606.7	23387.8	26948.3	22446.3	27889.8
277	28250.7	4.13639	1990	45-49 years	28247.9	28253.5	28247.2	28254.1	28246.4	28255	28245.4	28256	28242.6	28258.8
278	27906.7	4.10549	1991	45-49 years	27904	27909.5	27903.3	27910.2	27902.5	27911	27901.5	27912	27898.7	27914.8
279	27521.8	4.04507	1992	45-49 years	27519.1	27524.5	27518.4	27525.2	27517.6	27526	27516.6	27527	27513.8	27529.7
280	27172	3.98543	1993	45-49 years	27169.3	27174.7	27168.6	27175.3	27167.8	27176.1	27166.9	27177.1	27164.2	27179.8
281	26814.9	3.91126	1994	45-49 years	26812.3	26817.6	26811.7	26818.2	26810.9	26819	26809.9	26820	26807.3	26822.6
282	26640.2	3.85824	1995	45-49 years	26637.6	26642.8	26636.9	26643.4	26636.2	26644.2	26635.2	26645.1	26632.6	26647.7
283	26504.7	3.798	1996	45-49 years	26502.1	26507.2	26501.5	26507.9	26500.8	26508.6	26499.8	26509.6	26497.2	26512.1
284	26386	3.75743	1997	45-49 years	26383.5	26388.6	26382.9	26389.2	26382.1	26389.9	26381.2	26390.9	26378.7	26393.4
285	26255.1	3.71497	1998	45-49 years	26252.5	26257.6	26251.9	26258.2	26251.2	26258.9	26250.3	26259.8	26247.8	26262.3
286	26199.5	3.68354	1999	45-49 years	26197	26202	26196.4	26202.6	26195.7	26203.3	26194.8	26204.2	26192.3	26206.7
287	26114.8	3.64077	2000	45-49 years	26112.3	26117.2	26111.7	26117.8	26111	26118.6	26110.1	26119.5	26107.6	26121.9
288	26145.9	3.61623	2001	45-49 years	26143.5	26148.4	26142.9	26149	26142.2	26149.7	26141.3	26150.6	26138.9	26153
289	26285.6	3.59778	2002	45-49 years	26283.2	26288	26282.6	26288.6	26281.9	26289.3	26281	26290.2	26278.6	26292.7
290	26462.5	3.58614	2003	45-49 years	26460	26464.9	26459.4	26465.5	26458.7	26466.2	26457.9	26467.1	26455.4	26469.5
291	26590.2	3.57786	2004	45-49 years	26587.8	26592.6	26587.2	26593.2	26586.5	26593.9	26585.6	26594.8	26583.2	26597.2
292	26632.2	3.56816	2005	45-49 years	26629.8	26634.6	26629.2	26635.2	26628.5	26635.9	26627.6	26636.8	26625.2	26639.2
293	26451	3.54962	2006	45-49 years	26448.6	26453.4	26448	26454	26447.3	26454.7	26446.4	26455.5	26444	26457.9
294	26019.1	3.51975	2007	45-49 years	26016.7	26021.5	26016.2	26022.1	26015.5	26022.8	26014.6	26023.6	26012.2	26026
295	25463	3.48052	2008	45-49 years	25460.7	25465.4	25460.1	25466	25459.4	25466.6	25458.6	25467.5	25456.2	25469.8
296	24935.3	3.44073	2009	45-49 years	24933	24937.6	24932.4	24938.2	24931.7	24938.9	24930.9	24939.7	24928.6	24942
297	24662.4	3.40678	2010	45-49 years	24660.1	24664.7	24659.6	24665.3	24658.9	24666	24658.1	24666.8	24655.7	24669.1
298	24894.9	3.38177	2011	45-49 years	24892.6	24897.2	24892.1	24897.7	24891.4	24898.4	24890.6	24899.2	24888.3	24901.5
299	25553.2	3.36339	2012	45-49 years	25550.9	25555.4	25550.3	25556	25549.7	25556.7	25548.9	25557.5	25546.6	25559.8
300	26381.8	3.35254	2013	45-49 years	26379.6	26384.1	26379	26384.7	26378.4	26385.3	26377.5	26386.1	26375.3	26388.4
301	27089	3.34522	2014	45-49 years	27086.8	27091.3	27086.2	27091.8	27085.6	27092.5	27084.7	27093.3	27082.5	27095.6
302	27412.9	3.33718	2015	45-49 years	27410.6	27415.1	27410.1	27415.7	27409.4	27416.3	27408.6	27417.2	27406.3	27419.4
303	27441.1	3.32615	2016	45-49 years	27438.9	27443.4	27438.3	27443.9	27437.7	27444.6	27436.8	27445.4	27434.6	27447.6
304	27461	3.31652	2017	45-49 years	27458.7	27463.2	27458.2	27463.7	27457.5	27464.4	27456.7	27465.2	27454.5	27467.5
305	27488.3	3.30844	2018	45-49 years	27486.1	27490.5	27485.5	27491.1	27484.9	27491.7	27484.1	27492.6	27481.8	27494.8
306	27537.7	3.30258	2019	45-49 years	27535.4	27539.9	27534.9	27540.4	27534.2	27541.1	27533.4	27541.9	27531.2	27544.1
307	27554.7	3.29922	2020	45-49 years	27552.5	27556.9	27551.9	27557.5	27551.3	27558.1	27550.5	27559	27548.3	27561.2
308	27605.5	3.29875	2021	45-49 years	27603.2	27607.7	27602.7	27608.2	27602.1	27608.9	27601.2	27609.7	27599	27611.9
309	27779.8	632.439	2022	45-49 years	27353.6	28206.1	27247.9	28311.7	27124.6	28435	26969	28590.6	26540.2	29019.4
310	28049.6	721.893	2023	45-49 years	27563.1	28536.2	27442.5	28656.8	27301.8	28797.5	27124.2	28975.1	26634.7	29464.6
311	28308.5	807.674	2024	45-49 years	27764.1	28852.8	27629.2	28987.7	27471.7	29145.2	27273	29343.9	26725.4	29891.5
312	28536.9	890.4	2025	45-49 years	27936.7	29137	27788	29285.7	27614.4	29459.3	27395.4	29678.4	26791.7	30282
313	28722.6	970.531	2026	45-49 years	28068.5	29376.8	27906.4	29538.9	27717.2	29728.1	27478.4	29966.9	26820.4	30624.9
314	28855.8	1048.19	2027	45-49 years	28149.4	29562.3	27974.3	29737.4	27769.9	29941.8	27512.1	30199.6	26801.4	30910.3
315	28926	1122.3	2028	45-49 years	28169.6	29682.5	27982.2	29869.9	27763.3	30088.7	27487.3	30364.8	26726.3	31125.7
316	28933.7	1192.56	2029	45-49 years	28129.9	29737.5	27930.8	29936.7	27698.2	30169.2	27404.9	30462.6	26596.3	31271.1
317	28886.8	1259.22	2030	45-49 years	28038.1	29735.5	27827.8	29945.8	27582.3	30191.4	27272.5	30501.1	26418.8	31354.9
318	28798.2	1322.97	2031	45-49 years	27906.5	29689.9	27685.6	29910.8	27427.6	30168.8	27102.1	30494.2	26205.2	31391.2
319	28690.8	1385.07	2032	45-49 years	27757.2	29624.3	27525.9	29855.6	27255.9	30125.7	26915.1	30466.4	25976	31405.5
320	28600.8	1446.85	2033	45-49 years	27625.7	29576	27384.1	29817.6	27101.9	30099.8	26746	30455.7	25765	31436.7
321	28564.7	1510.26	2034	45-49 years	27546.8	29582.6	27294.5	29834.8	27000	30129.3	26628.5	30500.8	25604.6	31524.8
322	28607.8	1577.2	2035	45-49 years	27544.7	29670.8	27281.3	29934.2	26973.8	30241.7	26585.8	30629.7	25516.4	31699.1
323	30769.9	4.36351	1990	50-54 years	30767	30772.8	30766.2	30773.6	30765.4	30774.4	30764.3	30775.5	30761.3	30778.5
324	30524	4.33642	1991	50-54 years	30521.1	30526.9	30520.3	30527.6	30519.5	30528.5	30518.4	30529.5	30515.5	30532.5
325	30291.1	4.31696	1992	50-54 years	30288.2	30294	30287.5	30294.8	30286.7	30295.6	30285.6	30296.7	30282.7	30299.6
326	30073.9	4.30199	1993	50-54 years	30071	30076.8	30070.3	30077.6	30069.5	30078.4	30068.4	30079.5	30065.5	30082.4
327	29886.3	4.28844	1994	50-54 years	29883.4	29889.2	29882.7	29889.9	29881.8	29890.7	29880.8	29891.8	29877.9	29894.7
328	29727.1	4.27816	1995	50-54 years	29724.3	29730	29723.5	29730.7	29722.7	29731.6	29721.7	29732.6	29718.8	29735.5
329	29582.5	4.25246	1996	50-54 years	29579.6	29585.3	29578.9	29586	29578.1	29586.9	29577	29587.9	29574.1	29590.8
330	29396.9	4.19146	1997	50-54 years	29394.1	29399.7	29393.4	29400.4	29392.6	29401.3	29391.5	29402.3	29388.7	29405.1
331	29213.9	4.12921	1998	50-54 years	29211.1	29216.7	29210.5	29217.4	29209.7	29218.2	29208.6	29219.2	29205.8	29222
332	29008.4	4.0485	1999	50-54 years	29005.7	29011.2	29005	29011.9	29004.3	29012.6	29003.3	29013.6	29000.5	29016.4
333	28934.6	3.98944	2000	50-54 years	28931.9	28937.3	28931.2	28937.9	28930.5	28938.7	28929.5	28939.7	28926.8	28942.4
334	28908.8	3.92279	2001	50-54 years	28906.1	28911.4	28905.5	28912.1	28904.7	28912.8	28903.7	28913.8	28901.1	28916.5
335	28946.1	3.87915	2002	50-54 years	28943.4	28948.7	28942.8	28949.3	28942	28950.1	28941.1	28951	28938.5	28953.7
336	29023.1	3.83395	2003	50-54 years	29020.5	29025.7	29019.9	29026.3	29019.1	29027.1	29018.2	29028	29015.6	29030.6
337	29117.9	3.79958	2004	50-54 years	29115.4	29120.5	29114.7	29121.1	29114	29121.9	29113	29122.8	29110.5	29125.4
338	29156.7	3.75109	2005	50-54 years	29154.1	29159.2	29153.5	29159.8	29152.8	29160.6	29151.9	29161.5	29149.3	29164
339	28913	3.71517	2006	50-54 years	28910.5	28915.5	28909.8	28916.1	28909.1	28916.8	28908.2	28917.7	28905.7	28920.2
340	28383.3	3.67959	2007	50-54 years	28380.8	28385.8	28380.2	28386.4	28379.5	28387.1	28378.6	28388	28376.1	28390.5
341	27790	3.65124	2008	50-54 years	27787.6	27792.5	27786.9	27793.1	27786.2	27793.8	27785.3	27794.7	27782.9	27797.2
342	27359.6	3.63138	2009	50-54 years	27357.2	27362.1	27356.6	27362.7	27355.9	27363.4	27355	27364.3	27352.5	27366.8
343	27255.9	3.61746	2010	50-54 years	27253.4	27258.3	27252.8	27258.9	27252.1	27259.6	27251.2	27260.5	27248.8	27262.9
344	27594.5	3.60485	2011	50-54 years	27592.1	27597	27591.5	27597.6	27590.8	27598.3	27589.9	27599.2	27587.5	27601.6
345	28242.9	3.58778	2012	50-54 years	28240.5	28245.3	28239.9	28245.9	28239.2	28246.6	28238.3	28247.5	28235.9	28250
346	29004.3	3.56146	2013	50-54 years	29001.9	29006.7	29001.3	29007.3	29000.6	29008	28999.7	29008.9	28997.3	29011.3
347	29687	3.52981	2014	50-54 years	29684.6	29689.4	29684	29689.9	29683.3	29690.6	29682.4	29691.5	29680.1	29693.9
348	30033.4	3.49517	2015	50-54 years	30031	30035.7	30030.4	30036.3	30029.7	30037	30028.9	30037.8	30026.5	30040.2
349	30077.6	3.46315	2016	50-54 years	30075.3	30079.9	30074.7	30080.5	30074	30081.2	30073.2	30082.1	30070.8	30084.4
350	30060.9	3.4363	2017	50-54 years	30058.6	30063.2	30058	30063.8	30057.3	30064.5	30056.5	30065.3	30054.2	30067.6
351	30028.3	3.41712	2018	50-54 years	30026	30030.6	30025.4	30031.1	30024.7	30031.8	30023.9	30032.6	30021.6	30035
352	30025.4	3.40298	2019	50-54 years	30023.1	30027.7	30022.6	30028.3	30021.9	30028.9	30021.1	30029.8	30018.7	30032.1
353	30003.4	3.39115	2020	50-54 years	30001.2	30005.7	30000.6	30006.3	29999.9	30007	29999.1	30007.8	29996.8	30010.1
354	29995.1	3.37911	2021	50-54 years	29992.8	29997.4	29992.3	29998	29991.6	29998.6	29990.8	29999.5	29988.5	30001.8
355	29578	673.646	2022	50-54 years	29123.9	30032	29011.4	30144.5	28880.1	30275.9	28714.4	30441.6	28257.6	30898.3
356	29718.8	765.023	2023	50-54 years	29203.2	30234.4	29075.4	30362.2	28926.3	30511.4	28738.1	30699.6	28219.4	31218.3
357	29874.2	852.275	2024	50-54 years	29299.7	30448.6	29157.4	30590.9	28991.2	30757.1	28781.6	30966.8	28203.7	31544.6
358	30049.9	937.282	2025	50-54 years	29418.1	30681.6	29261.6	30838.1	29078.8	31020.9	28848.3	31251.5	28212.8	31886.9
359	30281.1	1022.66	2026	50-54 years	29591.8	30970.4	29421.1	31141.2	29221.6	31340.6	28970.1	31592.2	28276.7	32285.5
360	30559.8	1109.37	2027	50-54 years	29812.1	31307.5	29626.8	31492.8	29410.5	31709.1	29137.6	31982	28385.4	32734.1
361	30857.3	1196.42	2028	50-54 years	30050.9	31663.6	29851.1	31863.4	29617.8	32096.7	29323.4	32391.1	28512.3	33202.2
362	31142.6	1282.79	2029	50-54 years	30278	32007.2	30063.8	32221.5	29813.7	32471.6	29498.1	32787.2	28628.3	33656.9
363	31394.5	1367.77	2030	50-54 years	30472.7	32316.4	30244.2	32544.8	29977.5	32811.6	29641.1	33148	28713.7	34075.4
364	31599.6	1450.96	2031	50-54 years	30621.6	32577.5	30379.3	32819.9	30096.4	33102.8	29739.5	33459.7	28755.7	34443.5
365	31746.8	1531.91	2032	50-54 years	30714.3	32779.3	30458.4	33035.1	30159.7	33333.8	29782.9	33710.7	28744.2	34749.3
366	31824.7	1609.17	2033	50-54 years	30740.1	32909.3	30471.4	33178	30157.6	33491.8	29761.7	33887.6	28670.7	34978.7
367	31833.8	1682.23	2034	50-54 years	30700	32967.6	30419.1	33248.6	30091	33576.6	29677.2	33990.4	28536.6	35131
368	31782.9	1751.3	2035	50-54 years	30602.5	32963.3	30310	33255.7	29968.5	33597.2	29537.7	34028.1	28350.3	35215.4
369	31245.9	4.6229	1990	55-59 years	31242.8	31249	31242	31249.8	31241.1	31250.7	31240	31251.8	31236.8	31254.9
370	31071.1	4.58962	1991	55-59 years	31068	31074.2	31067.2	31074.9	31066.3	31075.8	31065.2	31076.9	31062.1	31080.1
371	30912	4.55199	1992	55-59 years	30909	30915.1	30908.2	30915.9	30907.3	30916.8	30906.2	30917.9	30903.1	30921
372	30797.7	4.5184	1993	55-59 years	30794.6	30800.7	30793.9	30801.5	30793	30802.4	30791.9	30803.5	30788.8	30806.5
373	30730	4.491	1994	55-59 years	30727	30733.1	30726.3	30733.8	30725.4	30734.7	30724.3	30735.8	30721.2	30738.8
374	30715.5	4.46824	1995	55-59 years	30712.5	30718.5	30711.8	30719.3	30710.9	30720.1	30709.8	30721.2	30706.8	30724.3
375	30679.2	4.45136	1996	55-59 years	30676.2	30682.2	30675.5	30683	30674.6	30683.8	30673.5	30684.9	30670.5	30688
376	30572.2	4.43807	1997	55-59 years	30569.2	30575.2	30568.5	30576	30567.6	30576.8	30566.5	30577.9	30563.5	30580.9
377	30429.6	4.42583	1998	55-59 years	30426.7	30432.6	30425.9	30433.4	30425.1	30434.2	30424	30435.3	30421	30438.3
378	30277.5	4.4118	1999	55-59 years	30274.6	30280.5	30273.8	30281.3	30273	30282.1	30271.9	30283.2	30268.9	30286.2
379	30141.1	4.39923	2000	55-59 years	30138.2	30144.1	30137.4	30144.8	30136.6	30145.7	30135.5	30146.8	30132.5	30149.8
380	30066.8	4.3709	2001	55-59 years	30063.8	30069.7	30063.1	30070.5	30062.3	30071.3	30061.2	30072.4	30058.2	30075.4
381	29988.8	4.30482	2002	55-59 years	29985.9	29991.7	29985.2	29992.4	29984.4	29993.3	29983.3	29994.3	29980.4	29997.3
382	29915.1	4.23739	2003	55-59 years	29912.3	29918	29911.6	29918.7	29910.7	29919.5	29909.7	29920.6	29906.8	29923.4
383	29874.5	4.152	2004	55-59 years	29871.7	29877.3	29871	29878	29870.2	29878.8	29869.2	29879.8	29866.4	29882.6
384	29814.6	4.0856	2005	55-59 years	29811.9	29817.4	29811.2	29818.1	29810.4	29818.9	29809.4	29819.9	29806.6	29822.7
385	29584.3	4.00573	2006	55-59 years	29581.6	29587	29580.9	29587.7	29580.2	29588.5	29579.2	29589.5	29576.5	29592.2
386	29122.9	3.94383	2007	55-59 years	29120.2	29125.5	29119.6	29126.2	29118.8	29127	29117.8	29127.9	29115.1	29130.6
387	28561	3.8786	2008	55-59 years	28558.4	28563.6	28557.7	28564.3	28557	28565	28556	28566	28553.4	28568.6
388	28077.2	3.82806	2009	55-59 years	28074.6	28079.8	28074	28080.4	28073.2	28081.2	28072.3	28082.1	28069.7	28084.7
389	27881.1	3.77262	2010	55-59 years	27878.6	27883.7	27878	27884.3	27877.2	27885	27876.3	27886	27873.7	27888.5
390	28207	3.74783	2011	55-59 years	28204.4	28209.5	28203.8	28210.1	28203.1	28210.8	28202.2	28211.8	28199.6	28214.3
391	28947.5	3.73724	2012	55-59 years	28945	28950.1	28944.4	28950.7	28943.7	28951.4	28942.7	28952.3	28940.2	28954.9
392	29798.9	3.73673	2013	55-59 years	29796.3	29801.4	29795.7	29802	29795	29802.7	29794.1	29803.6	29791.5	29806.2
393	30473.6	3.73759	2014	55-59 years	30471	30476.1	30470.4	30476.7	30469.7	30477.4	30468.8	30478.3	30466.2	30480.9
394	30745.3	3.72945	2015	55-59 years	30742.8	30747.8	30742.2	30748.4	30741.4	30749.2	30740.5	30750.1	30738	30752.6
395	30705.1	3.70757	2016	55-59 years	30702.6	30707.6	30702	30708.2	30701.3	30708.9	30700.4	30709.9	30697.8	30712.4
396	30621	3.67455	2017	55-59 years	30618.5	30623.4	30617.9	30624.1	30617.2	30624.8	30616.3	30625.7	30613.8	30628.2
397	30555.7	3.6306	2018	55-59 years	30553.3	30558.2	30552.7	30558.8	30552	30559.5	30551.1	30560.4	30548.6	30562.9
398	30552.1	3.58467	2019	55-59 years	30549.7	30554.5	30549.1	30555.1	30548.4	30555.8	30547.5	30556.7	30545.1	30559.1
399	30545.5	3.54262	2020	55-59 years	30543.1	30547.9	30542.5	30548.5	30541.9	30549.2	30541	30550.1	30538.6	30552.5
400	30578.8	3.51006	2021	55-59 years	30576.4	30581.2	30575.8	30581.7	30575.2	30582.4	30574.3	30583.3	30571.9	30585.7
401	29948.1	682.359	2022	55-59 years	29488.2	30408	29374.2	30522	29241.2	30655	29073.3	30822.9	28610.7	31285.5
402	29964.3	771.614	2023	55-59 years	29444.3	30484.4	29315.4	30613.3	29164.9	30763.7	28975.1	30953.5	28452	31476.7
403	30005.3	856.324	2024	55-59 years	29428.1	30582.4	29285.1	30725.4	29118.1	30892.4	28907.5	31103.1	28326.9	31683.7
404	30061.8	937.955	2025	55-59 years	29429.7	30694	29273	30850.7	29090.1	31033.6	28859.4	31264.3	28223.4	31900.2
405	30151.2	1018.59	2026	55-59 years	29464.7	30837.8	29294.6	31007.9	29096	31206.5	28845.4	31457.1	28154.8	32147.7
406	30271.6	1099.26	2027	55-59 years	29530.7	31012.5	29347.1	31196.1	29132.8	31410.4	28862.3	31680.8	28117	32426.1
407	30416.4	1179.65	2028	55-59 years	29621.3	31211.4	29424.3	31408.5	29194.3	31638.5	28904.1	31928.7	28104.3	32728.5
408	30576	1259.63	2029	55-59 years	29727	31425	29516.7	31635.4	29271	31881	28961.2	32190.9	28107.1	33044.9
409	30756.5	1339.97	2030	55-59 years	29853.3	31659.6	29629.5	31883.4	29368.2	32144.7	29038.6	32474.3	28130.1	33382.8
410	30993.8	1422.95	2031	55-59 years	30034.7	31952.9	29797.1	32190.5	29519.6	32468	29169.6	32818	28204.8	33782.8
411	31279.7	1508.97	2032	55-59 years	30262.6	32296.7	30010.6	32548.7	29716.4	32843	29345.2	33214.2	28322.1	34237.3
412	31584.8	1596.52	2033	55-59 years	30508.8	32660.9	30242.2	32927.5	29930.8	33238.8	29538.1	33631.6	28455.6	34714
413	31877.6	1683.98	2034	55-59 years	30742.6	33012.6	30461.4	33293.8	30133	33622.2	29718.7	34036.5	28577	35178.2
414	32136.1	1770.21	2035	55-59 years	30943	33329.2	30647.4	33624.9	30302.2	33970.1	29866.7	34405.5	28666.5	35605.7
415	29855.5	4.82524	1990	60-64 years	29852.2	29858.7	29851.4	29859.5	29850.5	29860.5	29849.3	29861.7	29846	29864.9
416	29780.8	4.78263	1991	60-64 years	29777.5	29784	29776.7	29784.8	29775.8	29785.7	29774.6	29786.9	29771.4	29790.1
417	29703.8	4.75165	1992	60-64 years	29700.6	29707	29699.8	29707.8	29698.9	29708.7	29697.7	29709.9	29694.5	29713.1
418	29631.8	4.72635	1993	60-64 years	29628.6	29635	29627.9	29635.8	29626.9	29636.7	29625.8	29637.9	29622.6	29641.1
419	29596.3	4.70647	1994	60-64 years	29593.1	29599.4	29592.3	29600.2	29591.4	29601.1	29590.2	29602.3	29587	29605.5
420	29599.7	4.68638	1995	60-64 years	29596.5	29602.8	29595.7	29603.6	29594.8	29604.5	29593.7	29605.7	29590.5	29608.9
421	29592	4.6595	1996	60-64 years	29588.9	29595.2	29588.1	29596	29587.2	29596.9	29586.1	29598	29582.9	29601.2
422	29519.1	4.62321	1997	60-64 years	29516	29522.2	29515.2	29523	29514.3	29523.9	29513.2	29525	29510	29528.2
423	29432.6	4.58772	1998	60-64 years	29429.5	29435.7	29428.8	29436.5	29427.9	29437.4	29426.7	29438.5	29423.6	29441.6
424	29358.9	4.55643	1999	60-64 years	29355.8	29362	29355.1	29362.8	29354.2	29363.6	29353.1	29364.8	29350	29367.9
425	29335.6	4.52944	2000	60-64 years	29332.6	29338.7	29331.8	29339.4	29330.9	29340.3	29329.8	29341.4	29326.8	29344.5
426	29308.1	4.50892	2001	60-64 years	29305.1	29311.2	29304.3	29311.9	29303.5	29312.8	29302.3	29313.9	29299.3	29317
427	29258.8	4.49394	2002	60-64 years	29255.8	29261.8	29255	29262.6	29254.1	29263.4	29253	29264.6	29250	29267.6
428	29189.3	4.47959	2003	60-64 years	29186.3	29192.3	29185.5	29193.1	29184.7	29193.9	29183.6	29195	29180.5	29198.1
429	29107.4	4.46232	2004	60-64 years	29104.4	29110.4	29103.6	29111.1	29102.8	29112	29101.7	29113.1	29098.6	29116.1
430	29056.8	4.4466	2005	60-64 years	29053.8	29059.8	29053	29060.5	29052.2	29061.4	29051.1	29062.5	29048.1	29065.5
431	28865.2	4.4076	2006	60-64 years	28862.2	28868.1	28861.5	28868.9	28860.6	28869.7	28859.5	28870.8	28856.5	28873.8
432	28337.7	4.31856	2007	60-64 years	28334.8	28340.7	28334.1	28341.4	28333.3	28342.2	28332.2	28343.3	28329.3	28346.2
433	27709.6	4.22826	2008	60-64 years	27706.8	27712.5	27706.1	27713.2	27705.2	27714	27704.2	27715	27701.3	27717.9
434	27205.3	4.12759	2009	60-64 years	27202.5	27208.1	27201.8	27208.8	27201	27209.6	27200	27210.6	27197.2	27213.4
435	27004.3	4.05844	2010	60-64 years	27001.6	27007	27000.9	27007.7	27000.1	27008.5	26999.1	27009.5	26996.3	27012.3
436	27324.5	3.99651	2011	60-64 years	27321.8	27327.2	27321.2	27327.9	27320.4	27328.7	27319.4	27329.7	27316.7	27332.4
437	28079.7	3.96891	2012	60-64 years	28077	28082.3	28076.3	28083	28075.6	28083.8	28074.6	28084.8	28071.9	28087.4
438	29007.3	3.94261	2013	60-64 years	29004.6	29009.9	29003.9	29010.6	29003.2	29011.3	29002.2	29012.3	28999.5	29015
439	29802.5	3.92294	2014	60-64 years	29799.9	29805.1	29799.2	29805.8	29798.4	29806.6	29797.5	29807.5	29794.8	29810.2
440	30211.4	3.87854	2015	60-64 years	30208.7	30214	30208.1	30214.6	30207.3	30215.4	30206.4	30216.3	30203.8	30219
441	30142.8	3.84265	2016	60-64 years	30140.3	30145.4	30139.6	30146.1	30138.9	30146.8	30137.9	30147.8	30135.3	30150.4
442	29904.5	3.80924	2017	60-64 years	29901.9	29907.1	29901.3	29907.7	29900.5	29908.4	29899.6	29909.4	29897	29912
443	29628.4	3.78387	2018	60-64 years	29625.8	29630.9	29625.2	29631.5	29624.4	29632.3	29623.5	29633.2	29620.9	29635.8
444	29464.8	3.76678	2019	60-64 years	29462.2	29467.3	29461.6	29467.9	29460.9	29468.7	29460	29469.6	29457.4	29472.2
445	29338.7	3.75153	2020	60-64 years	29336.2	29341.2	29335.5	29341.8	29334.8	29342.6	29333.9	29343.5	29331.3	29346
446	29296.9	3.73276	2021	60-64 years	29294.4	29299.4	29293.8	29300	29293	29300.8	29292.1	29301.7	29289.6	29304.2
447	29161.2	665.008	2022	60-64 years	28713	29609.4	28601.9	29720.4	28472.2	29850.1	28308.6	30013.7	27857.8	30464.6
448	29139.9	750.935	2023	60-64 years	28633.7	29646	28508.3	29771.4	28361.9	29917.8	28177.2	30102.6	27668	30611.7
449	29085.8	830.522	2024	60-64 years	28526	29645.5	28387.3	29784.2	28225.4	29946.2	28021	30150.5	27457.9	30713.6
450	29015.6	905.688	2025	60-64 years	28405.2	29626	28253.9	29777.3	28077.3	29953.9	27854.5	30176.7	27240.5	30790.8
451	28961.6	978.766	2026	60-64 years	28301.9	29621.3	28138.4	29784.7	27947.6	29975.6	27706.8	30216.3	27043.2	30879.9
452	28940.2	1051.27	2027	60-64 years	28231.6	29648.7	28056	29824.3	27851.1	30029.3	27592.4	30287.9	26879.7	31000.6
453	28956.4	1123.38	2028	60-64 years	28199.3	29713.6	28011.7	29901.2	27792.6	30120.3	27516.3	30396.6	26754.6	31158.3
454	28996.6	1194.94	2029	60-64 years	28191.2	29802	27991.7	30001.6	27758.6	30234.6	27464.7	30528.5	26654.5	31338.7
455	29051.9	1266.08	2030	60-64 years	28198.5	29905.2	27987.1	30116.6	27740.2	30363.5	27428.8	30675	26570.4	31533.4
456	29138.9	1338.17	2031	60-64 years	28236.9	30040.8	28013.5	30264.3	27752.5	30525.2	27423.3	30854.4	26516	31761.7
457	29255.8	1411.77	2032	60-64 years	28304.3	30207.3	28068.5	30443.1	27793.2	30718.4	27445.9	31065.7	26488.7	32022.9
458	29396.3	1486.32	2033	60-64 years	28394.6	30398.1	28146.3	30646.3	27856.5	30936.2	27490.9	31301.8	26483.2	32309.5
459	29551.2	1561.42	2034	60-64 years	28498.8	30603.6	28238.1	30864.4	27933.6	31168.9	27549.5	31553	26490.9	32611.6
460	29726.3	1637.65	2035	60-64 years	28622.5	30830.1	28349	31103.5	28029.7	31422.9	27626.8	31825.7	26516.5	32936.1
461	27409.2	5.22064	1990	65-69 years	27405.6	27412.7	27404.8	27413.5	27403.7	27414.6	27402.5	27415.9	27398.9	27419.4
462	27416.3	5.15699	1991	65-69 years	27412.8	27419.8	27412	27420.6	27410.9	27421.6	27409.7	27422.9	27406.2	27426.4
463	27442.6	5.09687	1992	65-69 years	27439.1	27446	27438.3	27446.8	27437.3	27447.8	27436	27449.1	27432.6	27452.6
464	27481.7	5.04025	1993	65-69 years	27478.3	27485.1	27477.5	27485.9	27476.5	27486.9	27475.2	27488.2	27471.8	27491.6
465	27516.6	4.9881	1994	65-69 years	27513.3	27520	27512.4	27520.8	27511.5	27521.8	27510.2	27523	27506.9	27526.4
466	27550	4.94545	1995	65-69 years	27546.6	27553.3	27545.8	27554.1	27544.8	27555.1	27543.6	27556.3	27540.3	27559.7
467	27534.3	4.90582	1996	65-69 years	27531	27537.6	27530.1	27538.4	27529.2	27539.4	27528	27540.6	27524.7	27543.9
468	27458.4	4.87395	1997	65-69 years	27455.1	27461.6	27454.3	27462.5	27453.3	27463.4	27452.1	27464.6	27448.8	27467.9
469	27354	4.84507	1998	65-69 years	27350.7	27357.2	27349.9	27358	27349	27359	27347.8	27360.2	27344.5	27363.5
470	27285.8	4.82001	1999	65-69 years	27282.6	27289.1	27281.8	27289.9	27280.8	27290.8	27279.6	27292	27276.4	27295.3
471	27275	4.79411	2000	65-69 years	27271.8	27278.2	27271	27279	27270	27280	27268.8	27281.1	27265.6	27284.4
472	27300.5	4.76295	2001	65-69 years	27297.3	27303.7	27296.5	27304.5	27295.6	27305.5	27294.4	27306.6	27291.2	27309.9
473	27298.5	4.72399	2002	65-69 years	27295.3	27301.7	27294.5	27302.5	27293.6	27303.4	27292.4	27304.6	27289.2	27307.8
474	27295.3	4.68667	2003	65-69 years	27292.1	27298.5	27291.4	27299.2	27290.4	27300.2	27289.3	27301.3	27286.1	27304.5
475	27290.4	4.65326	2004	65-69 years	27287.2	27293.5	27286.4	27294.3	27285.5	27295.2	27284.4	27296.3	27281.2	27299.5
476	27304.1	4.62291	2005	65-69 years	27301	27307.2	27300.2	27308	27299.3	27308.9	27298.2	27310	27295.1	27313.2
477	27116.2	4.58928	2006	65-69 years	27113.1	27119.3	27112.3	27120	27111.4	27120.9	27110.3	27122.1	27107.2	27125.2
478	26672.6	4.55057	2007	65-69 years	26669.5	26675.6	26668.7	26676.4	26667.9	26677.3	26666.7	26678.4	26663.7	26681.5
479	26128.7	4.50911	2008	65-69 years	26125.7	26131.8	26125	26132.5	26124.1	26133.4	26123	26134.5	26119.9	26137.6
480	25659.6	4.46952	2009	65-69 years	25656.6	25662.6	25655.8	25663.4	25655	25664.2	25653.9	25665.3	25650.8	25668.4
481	25449.3	4.44258	2010	65-69 years	25446.3	25452.3	25445.6	25453.1	25444.7	25453.9	25443.6	25455	25440.6	25458
482	25763.5	4.42137	2011	65-69 years	25760.5	25766.5	25759.8	25767.2	25758.9	25768.1	25757.8	25769.2	25754.8	25772.1
483	26495.8	4.37855	2012	65-69 years	26492.9	26498.8	26492.1	26499.5	26491.3	26500.4	26490.2	26501.4	26487.2	26504.4
484	27366.1	4.33986	2013	65-69 years	27363.2	27369	27362.4	27369.7	27361.6	27370.6	27360.5	27371.7	27357.6	27374.6
485	28157.6	4.27718	2014	65-69 years	28154.7	28160.5	28154	28161.2	28153.2	28162.1	28152.1	28163.1	28149.2	28166
486	28484.6	4.21849	2015	65-69 years	28481.8	28487.4	28481.1	28488.2	28480.2	28489	28479.2	28490	28476.3	28492.9
487	28403.7	4.13615	2016	65-69 years	28400.9	28406.5	28400.2	28407.2	28399.4	28408	28398.4	28409	28395.6	28411.8
488	28144.7	4.07473	2017	65-69 years	28141.9	28147.4	28141.2	28148.1	28140.5	28148.9	28139.5	28149.9	28136.7	28152.7
489	27873.1	4.01239	2018	65-69 years	27870.4	27875.8	27869.7	27876.5	27868.9	27877.2	27867.9	27878.2	27865.2	27881
490	27726.5	3.96654	2019	65-69 years	27723.8	27729.1	27723.1	27729.8	27722.4	27730.6	27721.4	27731.6	27718.7	27734.2
491	27665.9	3.91199	2020	65-69 years	27663.2	27668.5	27662.6	27669.2	27661.8	27669.9	27660.9	27670.9	27658.2	27673.5
492	27651.6	3.88164	2021	65-69 years	27649	27654.3	27648.4	27654.9	27647.6	27655.7	27646.7	27656.6	27644	27659.2
493	27121	619.284	2022	65-69 years	26703.6	27538.4	26600.2	27641.9	26479.5	27762.6	26327.1	27915	25907.2	28334.8
494	27129	699.864	2023	65-69 years	26657.3	27600.7	26540.4	27717.6	26404	27854.1	26231.8	28026.2	25757.3	28500.7
495	27157.7	776.222	2024	65-69 years	26634.5	27680.8	26504.9	27810.5	26353.5	27961.8	26162.5	28152.8	25636.3	28679.1
496	27195.5	849.622	2025	65-69 years	26622.8	27768.1	26481	27910	26315.3	28075.7	26106.3	28284.7	25530.2	28860.7
497	27228	920.912	2026	65-69 years	26607.3	27848.7	26453.5	28002.5	26273.9	28182.1	26047.4	28408.6	25423	29033
498	27239.7	990.231	2027	65-69 years	26572.2	27907.1	26406.9	28072.4	26213.8	28265.5	25970.2	28509.1	25298.8	29180.5
499	27220.3	1056.72	2028	65-69 years	26508.1	27932.5	26331.6	28109	26125.6	28315.1	25865.6	28575	25149.1	29291.5
500	27170.3	1120.28	2029	65-69 years	26415.3	27925.4	26228.2	28112.5	26009.7	28331	25734.1	28606.5	24974.6	29366.1
501	27105.4	1181.78	2030	65-69 years	26308.9	27901.9	26111.5	28099.2	25881	28329.7	25590.3	28620.4	24789.1	29421.7
502	27055.4	1242.99	2031	65-69 years	26217.7	27893.2	26010.1	28100.8	25767.7	28343.2	25461.9	28649	24619.2	29491.7
503	27036	1305.12	2032	65-69 years	26156.4	27915.7	25938.4	28133.6	25683.9	28388.1	25362.9	28709.2	24478	29594.1
504	27051.8	1368.23	2033	65-69 years	26129.6	27974	25901.1	28202.5	25634.3	28469.3	25297.7	28805.9	24370.1	29733.5
505	27089.9	1431.83	2034	65-69 years	26124.8	28054.9	25885.7	28294	25606.5	28573.3	25254.3	28925.5	24283.5	29896.3
506	27142.1	1495.73	2035	65-69 years	26134	28150.2	25884.2	28400	25592.5	28691.7	25224.6	29059.6	24210.5	30073.7
