# Supplementary material for: Global, Regional, and National Levels and Trends in Burden of Dental Caries and Periodontal Disease from 1990 to 2035：Result From the Global Burden of Disease Study 2021
Source: Research Square preprint supplement (doi:10.21203/rs.3.rs-5609270/v1), 2025-04-02
Supplement: Supplementary file 11 [file 66974443a2ed1fe2087e51a4.xlsx]

## Sheet: Sheet1
Exported data
	measure_name	location_name	sex_name	age_name	cause_name	metric_name	year	val	upper	lower
1	Prevalence	High-income Asia Pacific	Both	50-54 years	Periodontal diseases	Rate	2021	23896.5	31885	15399.3
2	Prevalence	High-income Asia Pacific	Both	55-59 years	Periodontal diseases	Rate	1990	26262.8	35216.3	18396
3	Prevalence	High-income Asia Pacific	Both	55-59 years	Periodontal diseases	Rate	2021	26037.8	34166.4	17357.1
4	Prevalence	High-income Asia Pacific	Both	60-64 years	Periodontal diseases	Rate	1990	26190.2	34328.1	18459.2
5	Prevalence	High-income Asia Pacific	Both	60-64 years	Periodontal diseases	Rate	2021	26446.8	34144.3	18195.9
6	Prevalence	High-income Asia Pacific	Both	65-69 years	Periodontal diseases	Rate	1990	24587.1	32622.9	16753.9
7	Prevalence	High-income Asia Pacific	Both	65-69 years	Periodontal diseases	Rate	2021	26044.8	33519.9	18492.5
8	Prevalence	High-income Asia Pacific	Both	70+ years	Periodontal diseases	Rate	1990	20123.3	26460.3	13606.2
9	Prevalence	High-income Asia Pacific	Both	70+ years	Periodontal diseases	Rate	2021	22802.9	28573.5	16510.4
10	Prevalence	Australasia	Both	5-9 years	Periodontal diseases	Rate	1990	0	0	0
11	Prevalence	Australasia	Both	5-9 years	Periodontal diseases	Rate	2021	0	0	0
12	Prevalence	Australasia	Both	10-14 years	Periodontal diseases	Rate	1990	0	0	0
13	Prevalence	Australasia	Both	10-14 years	Periodontal diseases	Rate	2021	0	0	0
14	Prevalence	Australasia	Both	15-19 years	Periodontal diseases	Rate	1990	540.165	1075.71	219.554
15	Prevalence	Australasia	Both	15-19 years	Periodontal diseases	Rate	2021	793.041	1483.65	389.373
16	Prevalence	Australasia	Both	25-29 years	Periodontal diseases	Rate	1990	4738.06	7712.44	2535.04
17	Prevalence	Australasia	Both	25-29 years	Periodontal diseases	Rate	2021	6556	11114.5	3472.95
18	Prevalence	Australasia	Both	30-34 years	Periodontal diseases	Rate	1990	8430.97	13165.2	4925.01
19	Prevalence	Australasia	Both	30-34 years	Periodontal diseases	Rate	2021	11302	19500.5	6279.74
20	Prevalence	Australasia	Both	35-39 years	Periodontal diseases	Rate	1990	12487.1	18609.4	7369.11
21	Prevalence	Australasia	Both	35-39 years	Periodontal diseases	Rate	2021	15832.2	25379.7	9172.19
22	Prevalence	Australasia	Both	40-44 years	Periodontal diseases	Rate	1990	16576.1	23943.6	9924.2
23	Prevalence	Australasia	Both	40-44 years	Periodontal diseases	Rate	2021	20090	30403.2	12623.5
24	Prevalence	Australasia	Both	45-49 years	Periodontal diseases	Rate	1990	19875.6	27888.3	11998.9
25	Prevalence	Australasia	Both	45-49 years	Periodontal diseases	Rate	2021	23314.9	32939.2	15286.7
26	Prevalence	Australasia	Both	50-54 years	Periodontal diseases	Rate	1990	21690.5	30090.8	13052.8
27	Prevalence	Western Europe	Both	5-9 years	Periodontal diseases	Rate	1990	0	0	0
28	Prevalence	Western Europe	Both	5-9 years	Periodontal diseases	Rate	2021	0	0	0
29	Prevalence	Western Europe	Both	10-14 years	Periodontal diseases	Rate	1990	0	0	0
30	Prevalence	Western Europe	Both	10-14 years	Periodontal diseases	Rate	2021	0	0	0
31	Prevalence	Western Europe	Both	15-19 years	Periodontal diseases	Rate	1990	1013.03	1668.3	604.719
32	Prevalence	Western Europe	Both	15-19 years	Periodontal diseases	Rate	2021	653.082	1202.44	314.924
33	Prevalence	Western Europe	Both	25-29 years	Periodontal diseases	Rate	1990	7483.23	10447.5	5075.94
34	Prevalence	Western Europe	Both	25-29 years	Periodontal diseases	Rate	2021	5775.52	9369.85	3243.71
35	Prevalence	Western Europe	Both	30-34 years	Periodontal diseases	Rate	1990	11400.4	15657.6	8007.4
36	Prevalence	Western Europe	Both	30-34 years	Periodontal diseases	Rate	2021	10105.5	15837.1	6053.1
37	Prevalence	Western Europe	Both	35-39 years	Periodontal diseases	Rate	1990	15600.3	20569.7	11190.2
38	Prevalence	Western Europe	Both	35-39 years	Periodontal diseases	Rate	2021	14009.3	20771.4	8893.96
39	Prevalence	Western Europe	Both	40-44 years	Periodontal diseases	Rate	1990	19955.2	25835.9	13650.7
40	Prevalence	Western Europe	Both	40-44 years	Periodontal diseases	Rate	2021	17630.9	24660.4	11874
41	Prevalence	Western Europe	Both	45-49 years	Periodontal diseases	Rate	1990	24629.7	31693.7	17760
42	Prevalence	Western Europe	Both	45-49 years	Periodontal diseases	Rate	2021	20740.1	27932.3	14636.9
43	Prevalence	Western Europe	Both	50-54 years	Periodontal diseases	Rate	1990	27808.2	35130.6	20531.9
44	Prevalence	Western Europe	Both	50-54 years	Periodontal diseases	Rate	2021	23734.3	30523	16933.8
45	Prevalence	Western Europe	Both	55-59 years	Periodontal diseases	Rate	1990	27717.3	34702.9	21743.9
46	Prevalence	Western Europe	Both	55-59 years	Periodontal diseases	Rate	2021	24580.8	31308.3	17938.1
47	Prevalence	Western Europe	Both	60-64 years	Periodontal diseases	Rate	1990	25996.2	32528.2	20137.3
48	Prevalence	Western Europe	Both	60-64 years	Periodontal diseases	Rate	2021	23152	29143.7	16909.3
49	Prevalence	Western Europe	Both	65-69 years	Periodontal diseases	Rate	1990	23068.9	29317.7	17613.9
50	Prevalence	Western Europe	Both	65-69 years	Periodontal diseases	Rate	2021	21260.4	27082	15591.5
51	Prevalence	Western Europe	Both	70+ years	Periodontal diseases	Rate	1990	19144.6	24378.5	14300.6
52	Prevalence	Western Europe	Both	70+ years	Periodontal diseases	Rate	2021	19408.4	24439.7	14687.7
53	Prevalence	Central Latin America	Both	5-9 years	Periodontal diseases	Rate	1990	0	0	0
54	Prevalence	Central Latin America	Both	5-9 years	Periodontal diseases	Rate	2021	0	0	0
55	Prevalence	Central Latin America	Both	10-14 years	Periodontal diseases	Rate	1990	0	0	0
56	Prevalence	Central Latin America	Both	10-14 years	Periodontal diseases	Rate	2021	0	0	0
57	Prevalence	Central Latin America	Both	15-19 years	Periodontal diseases	Rate	1990	1083.76	2053.91	500.114
58	Prevalence	Central Latin America	Both	15-19 years	Periodontal diseases	Rate	2021	1150.94	1900.85	653.931
59	Prevalence	Central Latin America	Both	25-29 years	Periodontal diseases	Rate	1990	10518.9	16448.4	5966.47
60	Prevalence	Central Latin America	Both	25-29 years	Periodontal diseases	Rate	2021	10387.2	16158.4	6363.79
61	Prevalence	Central Latin America	Both	30-34 years	Periodontal diseases	Rate	1990	17801.9	25744.5	10924.1
62	Prevalence	Central Latin America	Both	30-34 years	Periodontal diseases	Rate	2021	17805.6	25288.5	11736.2
63	Prevalence	Central Latin America	Both	35-39 years	Periodontal diseases	Rate	1990	24621.4	33753.8	15761.3
64	Prevalence	Central Latin America	Both	35-39 years	Periodontal diseases	Rate	2021	24559.9	32124.5	17125.9
65	Prevalence	Central Latin America	Both	40-44 years	Periodontal diseases	Rate	1990	30215.5	39170.3	20414.1
66	Prevalence	Central Latin America	Both	40-44 years	Periodontal diseases	Rate	2021	29837.5	37427.5	22077
67	Prevalence	Central Latin America	Both	45-49 years	Periodontal diseases	Rate	1990	33681.3	42408.6	24314.3
68	Prevalence	Central Latin America	Both	45-49 years	Periodontal diseases	Rate	2021	33113	39987.8	25687
69	Prevalence	Central Latin America	Both	50-54 years	Periodontal diseases	Rate	1990	34976	43204.7	25948.6
70	Prevalence	Australasia	Both	50-54 years	Periodontal diseases	Rate	2021	25108.7	33648.9	16876
71	Prevalence	Australasia	Both	55-59 years	Periodontal diseases	Rate	1990	21516.5	29514.4	14051.3
72	Prevalence	Australasia	Both	55-59 years	Periodontal diseases	Rate	2021	24688.2	32893.3	16754.8
73	Prevalence	Australasia	Both	60-64 years	Periodontal diseases	Rate	1990	19486.3	25998.8	13233.9
74	Prevalence	Australasia	Both	60-64 years	Periodontal diseases	Rate	2021	22371.4	29451.7	15164.5
75	Prevalence	Australasia	Both	65-69 years	Periodontal diseases	Rate	1990	16792	22548	11282.5
76	Prevalence	Australasia	Both	65-69 years	Periodontal diseases	Rate	2021	19849.2	26624.6	13477.2
77	Prevalence	Australasia	Both	70+ years	Periodontal diseases	Rate	1990	14069.4	18257.5	9625.12
78	Prevalence	Australasia	Both	70+ years	Periodontal diseases	Rate	2021	17582.9	23235.8	12350.7
79	Prevalence	Central Latin America	Both	50-54 years	Periodontal diseases	Rate	2021	34269.5	40654	27319
80	Prevalence	Central Latin America	Both	55-59 years	Periodontal diseases	Rate	1990	34174.1	42025.5	26766.8
81	Prevalence	Central Latin America	Both	55-59 years	Periodontal diseases	Rate	2021	33199	39479.5	26191.2
82	Prevalence	Central Latin America	Both	60-64 years	Periodontal diseases	Rate	1990	31589.2	38552.3	24545.1
83	Prevalence	Central Latin America	Both	60-64 years	Periodontal diseases	Rate	2021	30463.7	36413.2	23956.2
84	Prevalence	Central Latin America	Both	65-69 years	Periodontal diseases	Rate	1990	28214.8	34933.1	21512.6
85	Prevalence	Central Latin America	Both	65-69 years	Periodontal diseases	Rate	2021	27457.8	33224.3	21999.6
86	Prevalence	Central Latin America	Both	70+ years	Periodontal diseases	Rate	1990	22489.6	28565.7	17064.7
87	Prevalence	Central Latin America	Both	70+ years	Periodontal diseases	Rate	2021	23051.9	28169.1	18641
88	Prevalence	Eastern Europe	Both	5-9 years	Periodontal diseases	Rate	1990	0	0	0
89	Prevalence	Eastern Europe	Both	5-9 years	Periodontal diseases	Rate	2021	0	0	0
90	Prevalence	Eastern Europe	Both	10-14 years	Periodontal diseases	Rate	1990	0	0	0
91	Prevalence	Eastern Europe	Both	10-14 years	Periodontal diseases	Rate	2021	0	0	0
92	Prevalence	Eastern Europe	Both	15-19 years	Periodontal diseases	Rate	1990	511.258	996.552	213.231
93	Prevalence	Eastern Europe	Both	15-19 years	Periodontal diseases	Rate	2021	460.833	876.659	201.944
94	Prevalence	Eastern Europe	Both	25-29 years	Periodontal diseases	Rate	1990	5316.74	8629.1	2938.87
95	Prevalence	Eastern Europe	Both	25-29 years	Periodontal diseases	Rate	2021	4582.26	8222.68	2382.8
96	Prevalence	Eastern Europe	Both	30-34 years	Periodontal diseases	Rate	1990	10579.7	16460.4	6301.92
97	Prevalence	Eastern Europe	Both	30-34 years	Periodontal diseases	Rate	2021	9641.44	17716.2	5263.14
98	Prevalence	Eastern Europe	Both	35-39 years	Periodontal diseases	Rate	1990	17212.2	24888.2	10308.7
99	Prevalence	Eastern Europe	Both	35-39 years	Periodontal diseases	Rate	2021	15857.1	25973.9	9083.37
100	Prevalence	Eastern Europe	Both	40-44 years	Periodontal diseases	Rate	1990	23960.1	32289.6	14830.9
101	Prevalence	Eastern Europe	Both	40-44 years	Periodontal diseases	Rate	2021	22083	32095.8	13813.3
102	Prevalence	Eastern Europe	Both	45-49 years	Periodontal diseases	Rate	1990	28808.3	37425.7	19491.8
103	Prevalence	Eastern Europe	Both	45-49 years	Periodontal diseases	Rate	2021	26799.9	35988.7	18024.3
104	Prevalence	Eastern Europe	Both	50-54 years	Periodontal diseases	Rate	1990	31599.5	40130.2	22036.2
105	Prevalence	Central Sub-Saharan Africa	Both	5-9 years	Periodontal diseases	Rate	1990	0	0	0
106	Prevalence	Central Sub-Saharan Africa	Both	5-9 years	Periodontal diseases	Rate	2021	0	0	0
107	Prevalence	Central Sub-Saharan Africa	Both	10-14 years	Periodontal diseases	Rate	1990	0	0	0
108	Prevalence	Central Sub-Saharan Africa	Both	10-14 years	Periodontal diseases	Rate	2021	0	0	0
109	Prevalence	Central Sub-Saharan Africa	Both	15-19 years	Periodontal diseases	Rate	1990	2287.21	4227.83	1096.96
110	Prevalence	Central Sub-Saharan Africa	Both	15-19 years	Periodontal diseases	Rate	2021	823.422	1504.52	391.624
111	Prevalence	Central Sub-Saharan Africa	Both	25-29 years	Periodontal diseases	Rate	1990	16106	23085.7	9505.64
112	Prevalence	Central Sub-Saharan Africa	Both	25-29 years	Periodontal diseases	Rate	2021	5656.98	9839.13	3034.24
113	Prevalence	Central Sub-Saharan Africa	Both	30-34 years	Periodontal diseases	Rate	1990	23190.1	31510.1	15377.4
114	Prevalence	Central Sub-Saharan Africa	Both	30-34 years	Periodontal diseases	Rate	2021	9454.15	16629.4	5178.64
115	Prevalence	Central Sub-Saharan Africa	Both	35-39 years	Periodontal diseases	Rate	1990	28782.1	37542.6	19274.4
116	Prevalence	Central Sub-Saharan Africa	Both	35-39 years	Periodontal diseases	Rate	2021	13312.1	22357.2	7691.85
117	Prevalence	Central Sub-Saharan Africa	Both	40-44 years	Periodontal diseases	Rate	1990	33109.7	41712.9	23078.3
118	Prevalence	Central Sub-Saharan Africa	Both	40-44 years	Periodontal diseases	Rate	2021	17224.9	26611	10443.3
119	Prevalence	Central Sub-Saharan Africa	Both	45-49 years	Periodontal diseases	Rate	1990	35927.4	44529.4	26050.1
120	Prevalence	Central Sub-Saharan Africa	Both	45-49 years	Periodontal diseases	Rate	2021	20541.2	29830.8	13045.2
121	Prevalence	Central Sub-Saharan Africa	Both	50-54 years	Periodontal diseases	Rate	1990	37233.5	45834.2	27490
122	Prevalence	South Asia	Both	5-9 years	Periodontal diseases	Rate	1990	0	0	0
123	Prevalence	South Asia	Both	5-9 years	Periodontal diseases	Rate	2021	0	0	0
124	Prevalence	South Asia	Both	10-14 years	Periodontal diseases	Rate	1990	0	0	0
125	Prevalence	South Asia	Both	10-14 years	Periodontal diseases	Rate	2021	0	0	0
126	Prevalence	South Asia	Both	15-19 years	Periodontal diseases	Rate	1990	1832.96	3306.21	896.368
127	Prevalence	South Asia	Both	15-19 years	Periodontal diseases	Rate	2021	2032.66	3132.16	1241.71
128	Prevalence	South Asia	Both	25-29 years	Periodontal diseases	Rate	1990	13828.5	20264.2	8291.55
129	Prevalence	South Asia	Both	25-29 years	Periodontal diseases	Rate	2021	15523.3	20864.9	10492.1
130	Prevalence	South Asia	Both	30-34 years	Periodontal diseases	Rate	1990	21126.9	29391.9	13841.8
131	Prevalence	South Asia	Both	30-34 years	Periodontal diseases	Rate	2021	23485.6	30337.7	17137
132	Prevalence	South Asia	Both	35-39 years	Periodontal diseases	Rate	1990	27436.1	36303.7	18277.6
133	Prevalence	South Asia	Both	35-39 years	Periodontal diseases	Rate	2021	29875.3	36290.4	22479.8
134	Prevalence	South Asia	Both	40-44 years	Periodontal diseases	Rate	1990	32657.8	41436.5	22563.7
135	Prevalence	South Asia	Both	40-44 years	Periodontal diseases	Rate	2021	34743	41630.8	27229.7
136	Prevalence	South Asia	Both	45-49 years	Periodontal diseases	Rate	1990	35884.9	44327.1	26128.1
137	Prevalence	South Asia	Both	45-49 years	Periodontal diseases	Rate	2021	37741.2	44235.6	30184.5
138	Prevalence	South Asia	Both	50-54 years	Periodontal diseases	Rate	1990	37007.3	45261.5	27555.1
139	Prevalence	Eastern Europe	Both	50-54 years	Periodontal diseases	Rate	2021	29423.2	37450.6	20904.1
140	Prevalence	Eastern Europe	Both	55-59 years	Periodontal diseases	Rate	1990	31956.9	39780.4	24410.3
141	Prevalence	Eastern Europe	Both	55-59 years	Periodontal diseases	Rate	2021	29496.1	36891	21351
142	Prevalence	Eastern Europe	Both	60-64 years	Periodontal diseases	Rate	1990	30302.6	37394.6	23423.3
143	Prevalence	Eastern Europe	Both	60-64 years	Periodontal diseases	Rate	2021	27454.8	34466.6	20163.5
144	Prevalence	Eastern Europe	Both	65-69 years	Periodontal diseases	Rate	1990	27441.2	34413.9	20633.9
145	Prevalence	Eastern Europe	Both	65-69 years	Periodontal diseases	Rate	2021	24699.7	31223.6	18345.2
146	Prevalence	Eastern Europe	Both	70+ years	Periodontal diseases	Rate	1990	21350.7	27420.9	15973
147	Prevalence	Eastern Europe	Both	70+ years	Periodontal diseases	Rate	2021	20082.5	25748.5	14949.7
148	Prevalence	Caribbean	Both	5-9 years	Periodontal diseases	Rate	1990	0	0	0
149	Prevalence	Caribbean	Both	5-9 years	Periodontal diseases	Rate	2021	0	0	0
150	Prevalence	Caribbean	Both	10-14 years	Periodontal diseases	Rate	1990	0	0	0
151	Prevalence	Caribbean	Both	10-14 years	Periodontal diseases	Rate	2021	0	0	0
152	Prevalence	Caribbean	Both	15-19 years	Periodontal diseases	Rate	1990	1294.46	2401.27	594.767
153	Prevalence	Caribbean	Both	15-19 years	Periodontal diseases	Rate	2021	1126.89	2040.84	545.161
154	Prevalence	Caribbean	Both	25-29 years	Periodontal diseases	Rate	1990	11939.2	18394.3	6894.05
155	Prevalence	Caribbean	Both	25-29 years	Periodontal diseases	Rate	2021	9606.73	15989.7	5234.24
156	Prevalence	Caribbean	Both	30-34 years	Periodontal diseases	Rate	1990	19412.7	27777.8	12057.5
157	Prevalence	Caribbean	Both	30-34 years	Periodontal diseases	Rate	2021	16394.3	25650.8	9545.9
158	Prevalence	Caribbean	Both	35-39 years	Periodontal diseases	Rate	1990	26170.6	35044.3	17053.2
159	Prevalence	Caribbean	Both	35-39 years	Periodontal diseases	Rate	2021	22802	32624.8	14217
160	Prevalence	Caribbean	Both	40-44 years	Periodontal diseases	Rate	1990	31818.8	40726.7	22133.8
161	Prevalence	Caribbean	Both	40-44 years	Periodontal diseases	Rate	2021	28258.2	38312.2	19268.3
162	Prevalence	Caribbean	Both	45-49 years	Periodontal diseases	Rate	1990	35137.7	43680.5	25770.7
163	Prevalence	Caribbean	Both	45-49 years	Periodontal diseases	Rate	2021	32058	41054.1	23295.8
164	Prevalence	Caribbean	Both	50-54 years	Periodontal diseases	Rate	1990	36173	44399.1	27060.4
165	Prevalence	South Asia	Both	50-54 years	Periodontal diseases	Rate	2021	38888.6	45120.4	31771.7
166	Prevalence	South Asia	Both	55-59 years	Periodontal diseases	Rate	1990	36311.7	44570.7	27920.8
167	Prevalence	South Asia	Both	55-59 years	Periodontal diseases	Rate	2021	38340.9	44727.5	31317.5
168	Prevalence	South Asia	Both	60-64 years	Periodontal diseases	Rate	1990	34492	42185.2	26861.3
169	Prevalence	South Asia	Both	60-64 years	Periodontal diseases	Rate	2021	36662	42496.2	29858.3
170	Prevalence	South Asia	Both	65-69 years	Periodontal diseases	Rate	1990	32420.1	40021.4	24613.6
171	Prevalence	South Asia	Both	65-69 years	Periodontal diseases	Rate	2021	34668.1	40486.9	28739.3
172	Prevalence	South Asia	Both	70+ years	Periodontal diseases	Rate	1990	27527.1	33972.6	20879.7
173	Prevalence	South Asia	Both	70+ years	Periodontal diseases	Rate	2021	29771.9	34870.7	24458.6
174	Prevalence	Central Sub-Saharan Africa	Both	50-54 years	Periodontal diseases	Rate	2021	22873.8	31955.8	14738.7
175	Prevalence	Central Sub-Saharan Africa	Both	55-59 years	Periodontal diseases	Rate	1990	37143.8	45283.4	29110.5
176	Prevalence	Central Sub-Saharan Africa	Both	55-59 years	Periodontal diseases	Rate	2021	23766.3	33342.5	15251.6
177	Prevalence	Central Sub-Saharan Africa	Both	60-64 years	Periodontal diseases	Rate	1990	35916.3	43362.6	27684.9
178	Prevalence	Central Sub-Saharan Africa	Both	60-64 years	Periodontal diseases	Rate	2021	23524.3	31794.7	15160.5
179	Prevalence	Central Sub-Saharan Africa	Both	65-69 years	Periodontal diseases	Rate	1990	34234.2	41793.5	26075.1
180	Prevalence	Central Sub-Saharan Africa	Both	65-69 years	Periodontal diseases	Rate	2021	23233.3	31470.1	15522.4
181	Prevalence	Central Sub-Saharan Africa	Both	70+ years	Periodontal diseases	Rate	1990	31368.8	37959.6	24052.3
182	Prevalence	Central Sub-Saharan Africa	Both	70+ years	Periodontal diseases	Rate	2021	23093.9	30698.5	15628.9
183	Prevalence	Caribbean	Both	50-54 years	Periodontal diseases	Rate	2021	33655.2	41252.5	24933.2
184	Prevalence	Caribbean	Both	55-59 years	Periodontal diseases	Rate	1990	34984.5	42972.6	27634.4
185	Prevalence	Caribbean	Both	55-59 years	Periodontal diseases	Rate	2021	32550.5	39954.7	24485.6
186	Prevalence	Caribbean	Both	60-64 years	Periodontal diseases	Rate	1990	31979.9	38960.4	24970
187	Prevalence	Caribbean	Both	60-64 years	Periodontal diseases	Rate	2021	29409.3	36532.5	21939.2
188	Prevalence	Caribbean	Both	65-69 years	Periodontal diseases	Rate	1990	28370.1	35037.4	21450.8
189	Prevalence	Caribbean	Both	65-69 years	Periodontal diseases	Rate	2021	26220.5	32937.7	19573
190	Prevalence	Caribbean	Both	70+ years	Periodontal diseases	Rate	1990	22877.2	28966.4	17388.2
191	Prevalence	Caribbean	Both	70+ years	Periodontal diseases	Rate	2021	22718.9	28561.1	17471.1
192	Prevalence	Southeast Asia	Both	5-9 years	Periodontal diseases	Rate	1990	0	0	0
193	Prevalence	Southeast Asia	Both	5-9 years	Periodontal diseases	Rate	2021	0	0	0
194	Prevalence	Southeast Asia	Both	10-14 years	Periodontal diseases	Rate	1990	0	0	0
195	Prevalence	Southeast Asia	Both	10-14 years	Periodontal diseases	Rate	2021	0	0	0
196	Prevalence	Southeast Asia	Both	15-19 years	Periodontal diseases	Rate	1990	628.525	1191.39	273.313
197	Prevalence	Southeast Asia	Both	15-19 years	Periodontal diseases	Rate	2021	508.482	848.29	295.504
198	Prevalence	Southeast Asia	Both	25-29 years	Periodontal diseases	Rate	1990	6081.17	9473.41	3445.24
199	Prevalence	Southeast Asia	Both	25-29 years	Periodontal diseases	Rate	2021	4808.23	6914.5	3025.92
200	Prevalence	Southeast Asia	Both	30-34 years	Periodontal diseases	Rate	1990	10782	16146.6	6566.46
201	Prevalence	Southeast Asia	Both	30-34 years	Periodontal diseases	Rate	2021	8799.42	12331.4	5875.36
202	Prevalence	Southeast Asia	Both	35-39 years	Periodontal diseases	Rate	1990	15958.7	22474.9	10105.8
203	Prevalence	Southeast Asia	Both	35-39 years	Periodontal diseases	Rate	2021	13424.5	17892.8	9319.62
204	Prevalence	Southeast Asia	Both	40-44 years	Periodontal diseases	Rate	1990	21516.7	28795.8	13709.8
205	Prevalence	Southeast Asia	Both	40-44 years	Periodontal diseases	Rate	2021	18252.7	23400.5	13127.1
206	Prevalence	Southeast Asia	Both	45-49 years	Periodontal diseases	Rate	1990	25595.7	33374.1	17281.3
207	Prevalence	Southeast Asia	Both	45-49 years	Periodontal diseases	Rate	2021	22450.7	27833.9	16980.2
208	Prevalence	Southeast Asia	Both	50-54 years	Periodontal diseases	Rate	1990	27913.2	36198.8	19028.4
209	Prevalence	Southeast Asia	Both	50-54 years	Periodontal diseases	Rate	2021	25363.6	30691.7	19777.8
210	Prevalence	Southeast Asia	Both	55-59 years	Periodontal diseases	Rate	1990	28258.1	36409.1	20962.4
211	Prevalence	Southeast Asia	Both	55-59 years	Periodontal diseases	Rate	2021	26849.2	31825.2	21621
212	Prevalence	Southeast Asia	Both	60-64 years	Periodontal diseases	Rate	1990	27377	34874.3	20332.4
213	Prevalence	Southeast Asia	Both	60-64 years	Periodontal diseases	Rate	2021	26748.8	31390.7	21334.1
214	Prevalence	Southeast Asia	Both	65-69 years	Periodontal diseases	Rate	1990	25668.5	33188.3	19041.3
215	Prevalence	Southeast Asia	Both	65-69 years	Periodontal diseases	Rate	2021	25944.4	30553.3	20901.8
216	Prevalence	Southeast Asia	Both	70+ years	Periodontal diseases	Rate	1990	22365.3	28355.8	16471.2
217	Prevalence	Southeast Asia	Both	70+ years	Periodontal diseases	Rate	2021	23774.9	28047.6	19581.7
218	Prevalence	East Asia	Both	5-9 years	Periodontal diseases	Rate	1990	0	0	0
219	Prevalence	East Asia	Both	5-9 years	Periodontal diseases	Rate	2021	0	0	0
220	Prevalence	East Asia	Both	10-14 years	Periodontal diseases	Rate	1990	0	0	0
221	Prevalence	East Asia	Both	10-14 years	Periodontal diseases	Rate	2021	0	0	0
222	Prevalence	East Asia	Both	15-19 years	Periodontal diseases	Rate	1990	335.018	666.84	131.943
223	Prevalence	East Asia	Both	15-19 years	Periodontal diseases	Rate	2021	376.506	644.663	211.809
224	Prevalence	East Asia	Both	25-29 years	Periodontal diseases	Rate	1990	3392.55	5616.6	1837.88
225	Prevalence	East Asia	Both	25-29 years	Periodontal diseases	Rate	2021	3544.38	5354.8	2202.21
226	Prevalence	East Asia	Both	30-34 years	Periodontal diseases	Rate	1990	7376.39	11823.2	4258.55
227	Prevalence	East Asia	Both	30-34 years	Periodontal diseases	Rate	2021	7423.47	10729.3	4733.6
228	Prevalence	East Asia	Both	35-39 years	Periodontal diseases	Rate	1990	13531.3	20237	7911.46
229	Prevalence	East Asia	Both	35-39 years	Periodontal diseases	Rate	2021	12782.1	18228.6	8443.61
230	Prevalence	East Asia	Both	40-44 years	Periodontal diseases	Rate	1990	20618	28195.7	12137.6
231	Prevalence	East Asia	Both	40-44 years	Periodontal diseases	Rate	2021	19225.8	25274	13657.5
232	Prevalence	East Asia	Both	45-49 years	Periodontal diseases	Rate	1990	26731.3	35460	16722.1
233	Prevalence	East Asia	Both	45-49 years	Periodontal diseases	Rate	2021	25421.6	32052.8	18543.5
234	Prevalence	East Asia	Both	50-54 years	Periodontal diseases	Rate	1990	30820.1	40079	20142
235	Prevalence	East Asia	Both	50-54 years	Periodontal diseases	Rate	2021	29792.4	36529.9	22588.5
236	Prevalence	East Asia	Both	55-59 years	Periodontal diseases	Rate	1990	32690.7	41987.3	24261
237	Prevalence	East Asia	Both	55-59 years	Periodontal diseases	Rate	2021	31796.9	37831.1	25303.8
238	Prevalence	East Asia	Both	60-64 years	Periodontal diseases	Rate	1990	32030.3	39603.6	24505.7
239	Prevalence	East Asia	Both	60-64 years	Periodontal diseases	Rate	2021	31386.6	36695.8	25397.6
240	Prevalence	East Asia	Both	65-69 years	Periodontal diseases	Rate	1990	29686.9	37620.8	22409.9
241	Prevalence	East Asia	Both	65-69 years	Periodontal diseases	Rate	2021	29876.8	35274.9	24415.6
242	Prevalence	East Asia	Both	70+ years	Periodontal diseases	Rate	1990	24542.4	31233.3	18335.9
243	Prevalence	East Asia	Both	70+ years	Periodontal diseases	Rate	2021	24468.7	29247.2	19777.4
244	Prevalence	Tropical Latin America	Both	5-9 years	Periodontal diseases	Rate	1990	0	0	0
245	Prevalence	Tropical Latin America	Both	5-9 years	Periodontal diseases	Rate	2021	0	0	0
246	Prevalence	Tropical Latin America	Both	10-14 years	Periodontal diseases	Rate	1990	0	0	0
247	Prevalence	Tropical Latin America	Both	10-14 years	Periodontal diseases	Rate	2021	0	0	0
248	Prevalence	Tropical Latin America	Both	15-19 years	Periodontal diseases	Rate	1990	741.951	1412.85	336.356
249	Prevalence	Tropical Latin America	Both	15-19 years	Periodontal diseases	Rate	2021	815.225	1350.43	456.226
250	Prevalence	Tropical Latin America	Both	25-29 years	Periodontal diseases	Rate	1990	6682.58	10254.7	3816.94
251	Prevalence	Tropical Latin America	Both	25-29 years	Periodontal diseases	Rate	2021	8307.67	12079.9	5300.6
252	Prevalence	Tropical Latin America	Both	30-34 years	Periodontal diseases	Rate	1990	11872.5	18139.7	7215.13
253	Prevalence	Tropical Latin America	Both	30-34 years	Periodontal diseases	Rate	2021	15086.6	21096.8	10254.7
254	Prevalence	Tropical Latin America	Both	35-39 years	Periodontal diseases	Rate	1990	17729.7	25007.7	11116.4
255	Prevalence	Tropical Latin America	Both	35-39 years	Periodontal diseases	Rate	2021	22134.6	29205.4	15712.8
256	Prevalence	Tropical Latin America	Both	40-44 years	Periodontal diseases	Rate	1990	23513.9	31460	14622.7
257	Prevalence	Tropical Latin America	Both	40-44 years	Periodontal diseases	Rate	2021	28149.1	34833.8	20372.5
258	Prevalence	Tropical Latin America	Both	45-49 years	Periodontal diseases	Rate	1990	27695.8	36013.3	19001.6
259	Prevalence	Tropical Latin America	Both	45-49 years	Periodontal diseases	Rate	2021	31728.8	38360.6	24364.1
260	Prevalence	Tropical Latin America	Both	50-54 years	Periodontal diseases	Rate	1990	29373.1	37709	20618
261	Prevalence	Tropical Latin America	Both	50-54 years	Periodontal diseases	Rate	2021	32426.5	38642.1	25033.4
262	Prevalence	Tropical Latin America	Both	55-59 years	Periodontal diseases	Rate	1990	28141.7	36045.3	21122.6
263	Prevalence	Tropical Latin America	Both	55-59 years	Periodontal diseases	Rate	2021	30112	35667.9	24411
264	Prevalence	Tropical Latin America	Both	60-64 years	Periodontal diseases	Rate	1990	24524.9	31032	18185.8
265	Prevalence	Tropical Latin America	Both	60-64 years	Periodontal diseases	Rate	2021	25691.8	30636.7	20424.9
266	Prevalence	Tropical Latin America	Both	65-69 years	Periodontal diseases	Rate	1990	20254.1	26354.1	14698
267	Prevalence	Tropical Latin America	Both	65-69 years	Periodontal diseases	Rate	2021	21030.9	26042.2	16274.7
268	Prevalence	Tropical Latin America	Both	70+ years	Periodontal diseases	Rate	1990	14508.1	19695.6	10201.2
269	Prevalence	Tropical Latin America	Both	70+ years	Periodontal diseases	Rate	2021	14687.1	18590.5	11423.9
270	Prevalence	North Africa and Middle East	Both	5-9 years	Periodontal diseases	Rate	1990	0	0	0
271	Prevalence	North Africa and Middle East	Both	5-9 years	Periodontal diseases	Rate	2021	0	0	0
272	Prevalence	North Africa and Middle East	Both	10-14 years	Periodontal diseases	Rate	1990	0	0	0
273	Prevalence	North Africa and Middle East	Both	10-14 years	Periodontal diseases	Rate	2021	0	0	0
274	Prevalence	North Africa and Middle East	Both	15-19 years	Periodontal diseases	Rate	1990	861.694	1615.64	385.213
275	Prevalence	North Africa and Middle East	Both	15-19 years	Periodontal diseases	Rate	2021	909.539	1554.28	506.255
276	Prevalence	North Africa and Middle East	Both	25-29 years	Periodontal diseases	Rate	1990	5894.84	9248.25	3313.86
277	Prevalence	North Africa and Middle East	Both	25-29 years	Periodontal diseases	Rate	2021	7148.97	11369.2	4195.89
278	Prevalence	North Africa and Middle East	Both	30-34 years	Periodontal diseases	Rate	1990	9430.15	14401.6	5812.62
279	Prevalence	North Africa and Middle East	Both	30-34 years	Periodontal diseases	Rate	2021	12354.2	19422.8	7772.96
280	Prevalence	North Africa and Middle East	Both	35-39 years	Periodontal diseases	Rate	1990	13300.9	19227	8266.49
281	Prevalence	North Africa and Middle East	Both	35-39 years	Periodontal diseases	Rate	2021	17864.3	25969.1	11780.7
282	Prevalence	North Africa and Middle East	Both	40-44 years	Periodontal diseases	Rate	1990	17472.3	24401.6	10576
283	Prevalence	North Africa and Middle East	Both	40-44 years	Periodontal diseases	Rate	2021	23056.9	31683	16122.3
284	Prevalence	North Africa and Middle East	Both	45-49 years	Periodontal diseases	Rate	1990	21388.4	29178.2	13628.2
285	Prevalence	North Africa and Middle East	Both	45-49 years	Periodontal diseases	Rate	2021	26954.3	34439.3	19930.6
286	Prevalence	North Africa and Middle East	Both	50-54 years	Periodontal diseases	Rate	1990	24344.4	32630.2	15800.3
287	Prevalence	North Africa and Middle East	Both	50-54 years	Periodontal diseases	Rate	2021	29269.7	35769.9	22212.4
288	Prevalence	North Africa and Middle East	Both	55-59 years	Periodontal diseases	Rate	1990	25452.9	33369.9	18348.7
289	Prevalence	North Africa and Middle East	Both	55-59 years	Periodontal diseases	Rate	2021	29506.8	35826.1	22809.9
290	Prevalence	North Africa and Middle East	Both	60-64 years	Periodontal diseases	Rate	1990	24636.5	31921	17668.7
291	Prevalence	North Africa and Middle East	Both	60-64 years	Periodontal diseases	Rate	2021	27785.9	33625.1	21763.1
292	Prevalence	North Africa and Middle East	Both	65-69 years	Periodontal diseases	Rate	1990	22993	29686.8	16374.1
293	Prevalence	North Africa and Middle East	Both	65-69 years	Periodontal diseases	Rate	2021	25287.4	30588.4	19887.3
294	Prevalence	North Africa and Middle East	Both	70+ years	Periodontal diseases	Rate	1990	19985.4	25934.1	14624.5
295	Prevalence	North Africa and Middle East	Both	70+ years	Periodontal diseases	Rate	2021	21787.2	26901.4	17437.4
296	Prevalence	Eastern Sub-Saharan Africa	Both	5-9 years	Periodontal diseases	Rate	1990	0	0	0
297	Prevalence	Eastern Sub-Saharan Africa	Both	5-9 years	Periodontal diseases	Rate	2021	0	0	0
298	Prevalence	Eastern Sub-Saharan Africa	Both	10-14 years	Periodontal diseases	Rate	1990	0	0	0
299	Prevalence	Eastern Sub-Saharan Africa	Both	10-14 years	Periodontal diseases	Rate	2021	0	0	0
300	Prevalence	Eastern Sub-Saharan Africa	Both	15-19 years	Periodontal diseases	Rate	1990	2495.89	4530.46	1213.75
301	Prevalence	Eastern Sub-Saharan Africa	Both	15-19 years	Periodontal diseases	Rate	2021	1271.35	1960.37	775.554
302	Prevalence	Eastern Sub-Saharan Africa	Both	25-29 years	Periodontal diseases	Rate	1990	16934.1	24114.3	10166.2
303	Prevalence	Eastern Sub-Saharan Africa	Both	25-29 years	Periodontal diseases	Rate	2021	9589.32	13566	6495.31
304	Prevalence	Eastern Sub-Saharan Africa	Both	30-34 years	Periodontal diseases	Rate	1990	24270.6	32759.9	15986.9
305	Prevalence	Eastern Sub-Saharan Africa	Both	30-34 years	Periodontal diseases	Rate	2021	14891.1	20709.5	10444.9
306	Prevalence	Eastern Sub-Saharan Africa	Both	35-39 years	Periodontal diseases	Rate	1990	30094.7	39022.4	20385.9
307	Prevalence	Eastern Sub-Saharan Africa	Both	35-39 years	Periodontal diseases	Rate	2021	19492	25869.6	14281.3
308	Prevalence	Eastern Sub-Saharan Africa	Both	40-44 years	Periodontal diseases	Rate	1990	34878.5	43786.3	24562.4
309	Prevalence	Eastern Sub-Saharan Africa	Both	40-44 years	Periodontal diseases	Rate	2021	23406.7	30315.2	17544.4
310	Prevalence	Eastern Sub-Saharan Africa	Both	45-49 years	Periodontal diseases	Rate	1990	38102.4	46583	28130.1
311	Prevalence	Eastern Sub-Saharan Africa	Both	45-49 years	Periodontal diseases	Rate	2021	26422.6	33034.1	20138.7
312	Prevalence	Eastern Sub-Saharan Africa	Both	50-54 years	Periodontal diseases	Rate	1990	39902.6	48593.4	30127.3
313	Prevalence	Eastern Sub-Saharan Africa	Both	50-54 years	Periodontal diseases	Rate	2021	28415.7	35119.7	21561.9
314	Prevalence	Eastern Sub-Saharan Africa	Both	55-59 years	Periodontal diseases	Rate	1990	40258.7	48898.9	32310.7
315	Prevalence	Eastern Sub-Saharan Africa	Both	55-59 years	Periodontal diseases	Rate	2021	28967.8	36026	22135.1
316	Prevalence	Eastern Sub-Saharan Africa	Both	60-64 years	Periodontal diseases	Rate	1990	39233.7	47364.7	31066.2
317	Prevalence	Eastern Sub-Saharan Africa	Both	60-64 years	Periodontal diseases	Rate	2021	28618.7	35049.4	21908.5
318	Prevalence	Eastern Sub-Saharan Africa	Both	65-69 years	Periodontal diseases	Rate	1990	37624.4	45719.4	29300.7
319	Prevalence	Eastern Sub-Saharan Africa	Both	65-69 years	Periodontal diseases	Rate	2021	28478.3	34787.6	22602.2
320	Prevalence	Eastern Sub-Saharan Africa	Both	70+ years	Periodontal diseases	Rate	1990	34148.2	41037.5	26674.6
321	Prevalence	Eastern Sub-Saharan Africa	Both	70+ years	Periodontal diseases	Rate	2021	28361.4	33900.5	22488.3
322	Prevalence	Southern Latin America	Both	5-9 years	Periodontal diseases	Rate	1990	0	0	0
323	Prevalence	Southern Latin America	Both	5-9 years	Periodontal diseases	Rate	2021	0	0	0
324	Prevalence	Southern Latin America	Both	10-14 years	Periodontal diseases	Rate	1990	0	0	0
325	Prevalence	Southern Latin America	Both	10-14 years	Periodontal diseases	Rate	2021	0	0	0
326	Prevalence	Southern Latin America	Both	15-19 years	Periodontal diseases	Rate	1990	896.144	1687.33	420.748
327	Prevalence	Southern Latin America	Both	15-19 years	Periodontal diseases	Rate	2021	1043.89	1886.82	511.789
328	Prevalence	Southern Latin America	Both	25-29 years	Periodontal diseases	Rate	1990	7977.46	12310.3	4476.49
329	Prevalence	Southern Latin America	Both	25-29 years	Periodontal diseases	Rate	2021	9059.6	15138.3	4796.82
330	Prevalence	Southern Latin America	Both	30-34 years	Periodontal diseases	Rate	1990	13486.2	20322.2	8219.22
331	Prevalence	Southern Latin America	Both	30-34 years	Periodontal diseases	Rate	2021	15395.7	25107.2	8968.92
332	Prevalence	Southern Latin America	Both	35-39 years	Periodontal diseases	Rate	1990	19186	27194	11945.1
333	Prevalence	Southern Latin America	Both	35-39 years	Periodontal diseases	Rate	2021	21279.3	31898.1	12881.2
334	Prevalence	Southern Latin America	Both	40-44 years	Periodontal diseases	Rate	1990	24647.5	33353.6	15231.5
335	Prevalence	Southern Latin America	Both	40-44 years	Periodontal diseases	Rate	2021	26337.8	37203.6	17225.8
336	Prevalence	Southern Latin America	Both	45-49 years	Periodontal diseases	Rate	1990	28848.6	37893.3	19008.1
337	Prevalence	Southern Latin America	Both	45-49 years	Periodontal diseases	Rate	2021	29989	39969.4	20691.5
338	Prevalence	Southern Latin America	Both	50-54 years	Periodontal diseases	Rate	1990	31091.6	40075.7	20950
339	Prevalence	Southern Latin America	Both	50-54 years	Periodontal diseases	Rate	2021	31770.5	40273.3	22300.9
340	Prevalence	Southern Latin America	Both	55-59 years	Periodontal diseases	Rate	1990	30914.6	39928.6	22559.9
341	Prevalence	Southern Latin America	Both	55-59 years	Periodontal diseases	Rate	2021	31188.8	39195.1	22131.2
342	Prevalence	Southern Latin America	Both	60-64 years	Periodontal diseases	Rate	1990	28401.6	36124	20867.6
343	Prevalence	Southern Latin America	Both	60-64 years	Periodontal diseases	Rate	2021	28700.9	36089.7	20504.6
344	Prevalence	Southern Latin America	Both	65-69 years	Periodontal diseases	Rate	1990	25081.6	32317.2	18197.1
345	Prevalence	Southern Latin America	Both	65-69 years	Periodontal diseases	Rate	2021	25916.2	32864	18641.3
346	Prevalence	Southern Latin America	Both	70+ years	Periodontal diseases	Rate	1990	21187	27088	15504
347	Prevalence	Southern Latin America	Both	70+ years	Periodontal diseases	Rate	2021	22606.1	28610.2	16929.3
348	Prevalence	Western Sub-Saharan Africa	Both	5-9 years	Periodontal diseases	Rate	1990	0	0	0
349	Prevalence	Western Sub-Saharan Africa	Both	5-9 years	Periodontal diseases	Rate	2021	0	0	0
350	Prevalence	Western Sub-Saharan Africa	Both	10-14 years	Periodontal diseases	Rate	1990	0	0	0
351	Prevalence	Western Sub-Saharan Africa	Both	10-14 years	Periodontal diseases	Rate	2021	0	0	0
352	Prevalence	Western Sub-Saharan Africa	Both	15-19 years	Periodontal diseases	Rate	1990	5639.83	9627.21	3045.38
353	Prevalence	Western Sub-Saharan Africa	Both	15-19 years	Periodontal diseases	Rate	2021	3281.54	4842.49	2155.74
354	Prevalence	Western Sub-Saharan Africa	Both	25-29 years	Periodontal diseases	Rate	1990	25075.9	32217.2	17570.9
355	Prevalence	Western Sub-Saharan Africa	Both	25-29 years	Periodontal diseases	Rate	2021	13678.9	17212.9	10320.9
356	Prevalence	Western Sub-Saharan Africa	Both	30-34 years	Periodontal diseases	Rate	1990	31895.4	39492	23279.7
357	Prevalence	Western Sub-Saharan Africa	Both	30-34 years	Periodontal diseases	Rate	2021	18287.5	22792.8	14364.2
358	Prevalence	Western Sub-Saharan Africa	Both	35-39 years	Periodontal diseases	Rate	1990	36714.5	44464.5	27889.5
359	Prevalence	Western Sub-Saharan Africa	Both	35-39 years	Periodontal diseases	Rate	2021	21729.4	26261.6	17333.5
360	Prevalence	Western Sub-Saharan Africa	Both	40-44 years	Periodontal diseases	Rate	1990	40254.2	48197	30699.5
361	Prevalence	Western Sub-Saharan Africa	Both	40-44 years	Periodontal diseases	Rate	2021	24298.7	29284.9	19506.7
362	Prevalence	Western Sub-Saharan Africa	Both	45-49 years	Periodontal diseases	Rate	1990	42323.4	50631.8	32880.6
363	Prevalence	Western Sub-Saharan Africa	Both	45-49 years	Periodontal diseases	Rate	2021	25900.3	31016.7	20980.9
364	Prevalence	Western Sub-Saharan Africa	Both	50-54 years	Periodontal diseases	Rate	1990	43112.8	51684.2	33963.7
365	Prevalence	Western Sub-Saharan Africa	Both	50-54 years	Periodontal diseases	Rate	2021	26676.8	31638.6	21584.6
366	Prevalence	Western Sub-Saharan Africa	Both	55-59 years	Periodontal diseases	Rate	1990	42563.5	51206.9	34467
367	Prevalence	Western Sub-Saharan Africa	Both	55-59 years	Periodontal diseases	Rate	2021	26823.6	32569.7	21466.8
368	Prevalence	Western Sub-Saharan Africa	Both	60-64 years	Periodontal diseases	Rate	1990	40783.5	48888.3	32984.3
369	Prevalence	Western Sub-Saharan Africa	Both	60-64 years	Periodontal diseases	Rate	2021	26357.3	31330.5	21183.8
370	Prevalence	Western Sub-Saharan Africa	Both	65-69 years	Periodontal diseases	Rate	1990	38493.7	46366.9	30318.8
371	Prevalence	Western Sub-Saharan Africa	Both	65-69 years	Periodontal diseases	Rate	2021	25867.4	30902.4	20835.1
372	Prevalence	Western Sub-Saharan Africa	Both	70+ years	Periodontal diseases	Rate	1990	34385.7	41064.6	27386.7
373	Prevalence	Western Sub-Saharan Africa	Both	70+ years	Periodontal diseases	Rate	2021	24094.3	28586.4	19230.3
374	Prevalence	Southern Sub-Saharan Africa	Both	5-9 years	Periodontal diseases	Rate	1990	0	0	0
375	Prevalence	Southern Sub-Saharan Africa	Both	5-9 years	Periodontal diseases	Rate	2021	0	0	0
376	Prevalence	Southern Sub-Saharan Africa	Both	10-14 years	Periodontal diseases	Rate	1990	0	0	0
377	Prevalence	Southern Sub-Saharan Africa	Both	10-14 years	Periodontal diseases	Rate	2021	0	0	0
378	Prevalence	Southern Sub-Saharan Africa	Both	15-19 years	Periodontal diseases	Rate	1990	458.2	896.571	188.277
379	Prevalence	Southern Sub-Saharan Africa	Both	15-19 years	Periodontal diseases	Rate	2021	395.717	634.898	229.793
380	Prevalence	Southern Sub-Saharan Africa	Both	25-29 years	Periodontal diseases	Rate	1990	3276.05	5327.21	1767.3
381	Prevalence	Southern Sub-Saharan Africa	Both	25-29 years	Periodontal diseases	Rate	2021	2590.78	3924.93	1649.11
382	Prevalence	Southern Sub-Saharan Africa	Both	30-34 years	Periodontal diseases	Rate	1990	5502.81	8710.36	3226.52
383	Prevalence	Southern Sub-Saharan Africa	Both	30-34 years	Periodontal diseases	Rate	2021	4437.7	7004.5	2872.24
384	Prevalence	Southern Sub-Saharan Africa	Both	35-39 years	Periodontal diseases	Rate	1990	8197.33	12253.6	4858.77
385	Prevalence	Southern Sub-Saharan Africa	Both	35-39 years	Periodontal diseases	Rate	2021	6560.5	9806.86	4427.66
386	Prevalence	Southern Sub-Saharan Africa	Both	40-44 years	Periodontal diseases	Rate	1990	11637.7	17738.4	6622.89
387	Prevalence	Southern Sub-Saharan Africa	Both	40-44 years	Periodontal diseases	Rate	2021	8993.58	12695.3	6299.57
388	Prevalence	Southern Sub-Saharan Africa	Both	45-49 years	Periodontal diseases	Rate	1990	15011	22556	8693.41
389	Prevalence	Southern Sub-Saharan Africa	Both	45-49 years	Periodontal diseases	Rate	2021	11512.3	16224.5	7844.82
390	Prevalence	Southern Sub-Saharan Africa	Both	50-54 years	Periodontal diseases	Rate	1990	17910.9	26058.9	10290.1
391	Prevalence	Southern Sub-Saharan Africa	Both	50-54 years	Periodontal diseases	Rate	2021	13756.4	18774.3	9471.09
392	Prevalence	Southern Sub-Saharan Africa	Both	55-59 years	Periodontal diseases	Rate	1990	19889	28150.7	12850.9
393	Prevalence	Southern Sub-Saharan Africa	Both	55-59 years	Periodontal diseases	Rate	2021	15138.2	20840.6	10659.7
394	Prevalence	Southern Sub-Saharan Africa	Both	60-64 years	Periodontal diseases	Rate	1990	20654.1	28672.8	13532.3
395	Prevalence	Southern Sub-Saharan Africa	Both	60-64 years	Periodontal diseases	Rate	2021	15598.2	21322.1	10873.7
396	Prevalence	Southern Sub-Saharan Africa	Both	65-69 years	Periodontal diseases	Rate	1990	20665	28880.3	13270.4
397	Prevalence	Southern Sub-Saharan Africa	Both	65-69 years	Periodontal diseases	Rate	2021	15888.6	21527.6	11248.1
398	Prevalence	Southern Sub-Saharan Africa	Both	70+ years	Periodontal diseases	Rate	1990	20129.4	26357.2	13578.5
399	Prevalence	Southern Sub-Saharan Africa	Both	70+ years	Periodontal diseases	Rate	2021	16636	21792	11678.3
400	Prevalence	Oceania	Both	5-9 years	Periodontal diseases	Rate	1990	0	0	0
401	Prevalence	Oceania	Both	5-9 years	Periodontal diseases	Rate	2021	0	0	0
402	Prevalence	Oceania	Both	10-14 years	Periodontal diseases	Rate	1990	0	0	0
403	Prevalence	Oceania	Both	10-14 years	Periodontal diseases	Rate	2021	0	0	0
404	Prevalence	Oceania	Both	15-19 years	Periodontal diseases	Rate	1990	419.857	823.616	165.328
405	Prevalence	Oceania	Both	15-19 years	Periodontal diseases	Rate	2021	153.598	318.226	63.4254
406	Prevalence	Oceania	Both	25-29 years	Periodontal diseases	Rate	1990	3842.88	6234.63	2044.6
407	Prevalence	Oceania	Both	25-29 years	Periodontal diseases	Rate	2021	885.898	1638.87	463.433
408	Prevalence	Oceania	Both	30-34 years	Periodontal diseases	Rate	1990	7383.1	11500.1	4291.44
409	Prevalence	Oceania	Both	30-34 years	Periodontal diseases	Rate	2021	1602.28	3012.44	867.137
410	Prevalence	Oceania	Both	35-39 years	Periodontal diseases	Rate	1990	12156.3	18053.6	7222
411	Prevalence	Oceania	Both	35-39 years	Periodontal diseases	Rate	2021	2494.92	4435.48	1450.81
412	Prevalence	Oceania	Both	40-44 years	Periodontal diseases	Rate	1990	17873.2	25760	10371.3
413	Prevalence	Oceania	Both	40-44 years	Periodontal diseases	Rate	2021	3573.69	5909.42	2138.5
414	Prevalence	Oceania	Both	45-49 years	Periodontal diseases	Rate	1990	23300.5	32984.7	13945
415	Prevalence	Oceania	Both	45-49 years	Periodontal diseases	Rate	2021	4724.2	7538.73	2870.72
416	Prevalence	Oceania	Both	50-54 years	Periodontal diseases	Rate	1990	27366	37568	16862.1
417	Prevalence	Global	Both	5-9 years	Periodontal diseases	Rate	1990	0	0	0
418	Prevalence	Global	Both	5-9 years	Periodontal diseases	Rate	2021	0	0	0
419	Prevalence	Global	Both	10-14 years	Periodontal diseases	Rate	1990	0	0	0
420	Prevalence	Global	Both	10-14 years	Periodontal diseases	Rate	2021	0	0	0
421	Prevalence	Global	Both	15-19 years	Periodontal diseases	Rate	1990	1127.65	2026.67	551.878
422	Prevalence	Global	Both	15-19 years	Periodontal diseases	Rate	2021	1305.39	1967.64	807.669
423	Prevalence	Global	Both	25-29 years	Periodontal diseases	Rate	1990	7923.55	11743.3	4734.28
424	Prevalence	Global	Both	25-29 years	Periodontal diseases	Rate	2021	8912.1	12376.6	6035.08
425	Prevalence	Global	Both	30-34 years	Periodontal diseases	Rate	1990	12864.3	18445.5	8252.97
426	Prevalence	Global	Both	30-34 years	Periodontal diseases	Rate	2021	13751.5	18498.3	9691.44
427	Prevalence	Global	Both	35-39 years	Periodontal diseases	Rate	1990	18115.6	24926.7	11646.1
428	Prevalence	Global	Both	35-39 years	Periodontal diseases	Rate	2021	19052.2	24708.8	13912.6
429	Prevalence	Global	Both	40-44 years	Periodontal diseases	Rate	1990	23706.5	31025.9	15087.1
430	Prevalence	Global	Both	40-44 years	Periodontal diseases	Rate	2021	23936.7	30374.3	18062.3
431	Prevalence	Global	Both	45-49 years	Periodontal diseases	Rate	1990	28250.7	35995.4	19546
432	Prevalence	Global	Both	45-49 years	Periodontal diseases	Rate	2021	27605.5	33397.8	21582.8
433	Prevalence	Global	Both	50-54 years	Periodontal diseases	Rate	1990	30769.9	38868.5	21588.9
434	Prevalence	Oceania	Both	50-54 years	Periodontal diseases	Rate	2021	5787.61	9329.06	3400.54
435	Prevalence	Oceania	Both	55-59 years	Periodontal diseases	Rate	1990	29397.5	38875.4	20579.4
436	Prevalence	Oceania	Both	55-59 years	Periodontal diseases	Rate	2021	6352.7	10130.4	3807.19
437	Prevalence	Oceania	Both	60-64 years	Periodontal diseases	Rate	1990	29032.7	36859.1	21056
438	Prevalence	Oceania	Both	60-64 years	Periodontal diseases	Rate	2021	6384.16	9974.09	3827.81
439	Prevalence	Oceania	Both	65-69 years	Periodontal diseases	Rate	1990	26976.8	34489.6	19259.8
440	Prevalence	Oceania	Both	65-69 years	Periodontal diseases	Rate	2021	6281.51	9527.67	3940.76
441	Prevalence	Oceania	Both	70+ years	Periodontal diseases	Rate	1990	22477.4	29361.2	16200.2
442	Prevalence	Oceania	Both	70+ years	Periodontal diseases	Rate	2021	6399.53	9767.23	3859.02
443	Prevalence	Global	Both	50-54 years	Periodontal diseases	Rate	2021	29995.1	35595.2	24075.4
444	Prevalence	Global	Both	55-59 years	Periodontal diseases	Rate	1990	31245.9	39322.5	23687.7
445	Prevalence	Global	Both	55-59 years	Periodontal diseases	Rate	2021	30578.8	35952.2	24661.8
446	Prevalence	Global	Both	60-64 years	Periodontal diseases	Rate	1990	29855.5	37158.9	23092.3
447	Prevalence	Global	Both	60-64 years	Periodontal diseases	Rate	2021	29296.9	34489.5	23420
448	Prevalence	Global	Both	65-69 years	Periodontal diseases	Rate	1990	27409.2	34554	20836.3
449	Prevalence	Global	Both	65-69 years	Periodontal diseases	Rate	2021	27651.7	32532.5	22643.9
450	Prevalence	Global	Both	70+ years	Periodontal diseases	Rate	1990	22654.1	28444.5	16999.5
451	Prevalence	Global	Both	70+ years	Periodontal diseases	Rate	2021	23403.1	27789.1	18961.8
452	Prevalence	Central Asia	Both	5-9 years	Periodontal diseases	Rate	1990	0	0	0
453	Prevalence	Central Asia	Both	5-9 years	Periodontal diseases	Rate	2021	0	0	0
454	Prevalence	Central Asia	Both	10-14 years	Periodontal diseases	Rate	1990	0	0	0
455	Prevalence	Central Asia	Both	10-14 years	Periodontal diseases	Rate	2021	0	0	0
456	Prevalence	Central Asia	Both	15-19 years	Periodontal diseases	Rate	1990	452.304	887.573	187.767
457	Prevalence	Central Asia	Both	15-19 years	Periodontal diseases	Rate	2021	447.326	835.638	199.486
458	Prevalence	Central Asia	Both	25-29 years	Periodontal diseases	Rate	1990	4173.22	6734.52	2260.38
459	Prevalence	Central Asia	Both	25-29 years	Periodontal diseases	Rate	2021	4040.56	7273.21	2092
460	Prevalence	Central Asia	Both	30-34 years	Periodontal diseases	Rate	1990	8054.95	12470.4	4743.81
461	Prevalence	Central Asia	Both	30-34 years	Periodontal diseases	Rate	2021	8154.84	15264.9	4342.84
462	Prevalence	Central Asia	Both	35-39 years	Periodontal diseases	Rate	1990	13225.5	19338.2	7956.65
463	Prevalence	Central Asia	Both	35-39 years	Periodontal diseases	Rate	2021	13299.4	22648.4	7526.16
464	Prevalence	Central Asia	Both	40-44 years	Periodontal diseases	Rate	1990	19313.6	26778.8	11127.1
465	Prevalence	Central Asia	Both	40-44 years	Periodontal diseases	Rate	2021	18829.5	28416.3	11539.8
466	Prevalence	Central Asia	Both	45-49 years	Periodontal diseases	Rate	1990	24249.6	33183.1	15167.3
467	Prevalence	Central Asia	Both	45-49 years	Periodontal diseases	Rate	2021	23374.2	32826.6	15264.2
468	Prevalence	Central Asia	Both	50-54 years	Periodontal diseases	Rate	1990	27557.5	36172.7	17950.7
469	Prevalence	Central Asia	Both	50-54 years	Periodontal diseases	Rate	2021	26074.3	34485.6	17234.5
470	Prevalence	Central Asia	Both	55-59 years	Periodontal diseases	Rate	1990	28355.3	36755.4	20420.9
471	Prevalence	Central Asia	Both	55-59 years	Periodontal diseases	Rate	2021	26076.8	33629.2	17833.2
472	Prevalence	Central Asia	Both	60-64 years	Periodontal diseases	Rate	1990	27389.8	34595	20137.4
473	Prevalence	Central Asia	Both	60-64 years	Periodontal diseases	Rate	2021	23866.9	30742.7	16431.7
474	Prevalence	Central Asia	Both	65-69 years	Periodontal diseases	Rate	1990	25586.6	32657.1	18779.3
475	Prevalence	Central Asia	Both	65-69 years	Periodontal diseases	Rate	2021	21020.2	27407	14766.5
476	Prevalence	Central Asia	Both	70+ years	Periodontal diseases	Rate	1990	21506.3	27162.3	15932.6
477	Prevalence	Central Asia	Both	70+ years	Periodontal diseases	Rate	2021	16843.9	22380	11912.3
478	Prevalence	Central Europe	Both	5-9 years	Periodontal diseases	Rate	1990	0	0	0
479	Prevalence	Central Europe	Both	5-9 years	Periodontal diseases	Rate	2021	0	0	0
480	Prevalence	Central Europe	Both	10-14 years	Periodontal diseases	Rate	1990	0	0	0
481	Prevalence	Central Europe	Both	10-14 years	Periodontal diseases	Rate	2021	0	0	0
482	Prevalence	Central Europe	Both	15-19 years	Periodontal diseases	Rate	1990	516.829	997.164	220.038
483	Prevalence	Central Europe	Both	15-19 years	Periodontal diseases	Rate	2021	565.133	1056.05	260.051
484	Prevalence	Central Europe	Both	25-29 years	Periodontal diseases	Rate	1990	4602.71	7267.77	2625.23
485	Prevalence	Central Europe	Both	25-29 years	Periodontal diseases	Rate	2021	5188.74	8865.52	2735.7
486	Prevalence	Central Europe	Both	30-34 years	Periodontal diseases	Rate	1990	8459.62	13010	5182.43
487	Prevalence	Central Europe	Both	30-34 years	Periodontal diseases	Rate	2021	9912.94	17323.7	5450.58
488	Prevalence	Central Europe	Both	35-39 years	Periodontal diseases	Rate	1990	13067.7	18911.9	8053.05
489	Prevalence	Central Europe	Both	35-39 years	Periodontal diseases	Rate	2021	15308.8	24291	8851.03
490	Prevalence	Central Europe	Both	40-44 years	Periodontal diseases	Rate	1990	17849.1	24631.6	10813.7
491	Prevalence	Central Europe	Both	40-44 years	Periodontal diseases	Rate	2021	19945.9	29422.8	12683.6
492	Prevalence	Central Europe	Both	45-49 years	Periodontal diseases	Rate	1990	21193.7	28714.6	13514.4
493	Prevalence	Central Europe	Both	45-49 years	Periodontal diseases	Rate	2021	23564.9	32303.9	15860.9
494	Prevalence	Central Europe	Both	50-54 years	Periodontal diseases	Rate	1990	23938.4	31939.7	15631.4
495	Prevalence	Central Europe	Both	50-54 years	Periodontal diseases	Rate	2021	25821.2	33685.8	17513.9
496	Prevalence	Central Europe	Both	55-59 years	Periodontal diseases	Rate	1990	24736	32341.9	17852.1
497	Prevalence	Central Europe	Both	55-59 years	Periodontal diseases	Rate	2021	26282.1	33561.4	18246.8
498	Prevalence	Central Europe	Both	60-64 years	Periodontal diseases	Rate	1990	23661.6	30583.3	17106
499	Prevalence	Central Europe	Both	60-64 years	Periodontal diseases	Rate	2021	24823.4	31681.4	17680.1
500	Prevalence	Central Europe	Both	65-69 years	Periodontal diseases	Rate	1990	21608.1	28099	15287.3
501	Prevalence	Central Europe	Both	65-69 years	Periodontal diseases	Rate	2021	22808.4	29303.7	16328.5
502	Prevalence	Central Europe	Both	70+ years	Periodontal diseases	Rate	1990	17447.8	22952.5	12438.7
503	Prevalence	Central Europe	Both	70+ years	Periodontal diseases	Rate	2021	19496.9	25135.3	14555.1
504	Prevalence	High-income North America	Both	5-9 years	Periodontal diseases	Rate	1990	0	0	0
505	Prevalence	High-income North America	Both	5-9 years	Periodontal diseases	Rate	2021	0	0	0
506	Prevalence	High-income North America	Both	10-14 years	Periodontal diseases	Rate	1990	0	0	0
507	Prevalence	High-income North America	Both	10-14 years	Periodontal diseases	Rate	2021	0	0	0
508	Prevalence	High-income North America	Both	15-19 years	Periodontal diseases	Rate	1990	450.821	884.515	184.487
509	Prevalence	High-income North America	Both	15-19 years	Periodontal diseases	Rate	2021	455.472	735.371	263.003
510	Prevalence	High-income North America	Both	25-29 years	Periodontal diseases	Rate	1990	4081.65	6632.39	2196.69
511	Prevalence	High-income North America	Both	25-29 years	Periodontal diseases	Rate	2021	3982	6001.91	2527.95
512	Prevalence	High-income North America	Both	30-34 years	Periodontal diseases	Rate	1990	7784.7	12119.2	4579.72
513	Prevalence	High-income North America	Both	30-34 years	Periodontal diseases	Rate	2021	7609.56	11437.7	4946.95
514	Prevalence	High-income North America	Both	35-39 years	Periodontal diseases	Rate	1990	12795.2	18919.3	7561.32
515	Prevalence	High-income North America	Both	35-39 years	Periodontal diseases	Rate	2021	12153.5	17009.1	8307.39
516	Prevalence	High-income North America	Both	40-44 years	Periodontal diseases	Rate	1990	18662.2	25689.6	10961
517	Prevalence	High-income North America	Both	40-44 years	Periodontal diseases	Rate	2021	17213.8	23047.1	12441.4
518	Prevalence	High-income North America	Both	45-49 years	Periodontal diseases	Rate	1990	23842.8	32065.5	15073.7
519	Prevalence	High-income North America	Both	45-49 years	Periodontal diseases	Rate	2021	21825.1	28018	16013.1
520	Prevalence	High-income North America	Both	50-54 years	Periodontal diseases	Rate	1990	27355.9	35714.2	17984.8
521	Prevalence	High-income North America	Both	50-54 years	Periodontal diseases	Rate	2021	25140.9	31203	19380.8
522	Prevalence	High-income North America	Both	55-59 years	Periodontal diseases	Rate	1990	28944.2	36722.4	21168
523	Prevalence	High-income North America	Both	55-59 years	Periodontal diseases	Rate	2021	26660.8	31841.7	21089.2
524	Prevalence	High-income North America	Both	60-64 years	Periodontal diseases	Rate	1990	28591.4	35877.4	21980
525	Prevalence	High-income North America	Both	60-64 years	Periodontal diseases	Rate	2021	26455.5	31721.2	20948.9
526	Prevalence	High-income North America	Both	65-69 years	Periodontal diseases	Rate	1990	27241	34138.7	20723.9
527	Prevalence	High-income North America	Both	65-69 years	Periodontal diseases	Rate	2021	25646.7	30720.1	20407.3
528	Prevalence	High-income North America	Both	70+ years	Periodontal diseases	Rate	1990	24091.8	30087.9	18642.4
529	Prevalence	High-income North America	Both	70+ years	Periodontal diseases	Rate	2021	24230.1	28681.8	19764.1
530	Prevalence	High-income Asia Pacific	Both	5-9 years	Periodontal diseases	Rate	1990	0	0	0
531	Prevalence	High-income Asia Pacific	Both	5-9 years	Periodontal diseases	Rate	2021	0	0	0
532	Prevalence	High-income Asia Pacific	Both	10-14 years	Periodontal diseases	Rate	1990	0	0	0
533	Prevalence	High-income Asia Pacific	Both	10-14 years	Periodontal diseases	Rate	2021	0	0	0
534	Prevalence	High-income Asia Pacific	Both	15-19 years	Periodontal diseases	Rate	1990	351.003	708.031	142.523
535	Prevalence	High-income Asia Pacific	Both	15-19 years	Periodontal diseases	Rate	2021	356.939	684.351	157.252
536	Prevalence	High-income Asia Pacific	Both	25-29 years	Periodontal diseases	Rate	1990	2977.88	4868.31	1590.97
537	Prevalence	High-income Asia Pacific	Both	25-29 years	Periodontal diseases	Rate	2021	2987.85	5435.58	1553.49
538	Prevalence	High-income Asia Pacific	Both	30-34 years	Periodontal diseases	Rate	1990	5723.12	9100.16	3306.5
539	Prevalence	High-income Asia Pacific	Both	30-34 years	Periodontal diseases	Rate	2021	6043.84	11404.8	3200.01
540	Prevalence	High-income Asia Pacific	Both	35-39 years	Periodontal diseases	Rate	1990	9891	14609.2	5824.52
541	Prevalence	High-income Asia Pacific	Both	35-39 years	Periodontal diseases	Rate	2021	10128.8	17712.8	5669.01
542	Prevalence	High-income Asia Pacific	Both	40-44 years	Periodontal diseases	Rate	1990	15276.1	21985.1	8506.9
543	Prevalence	High-income Asia Pacific	Both	40-44 years	Periodontal diseases	Rate	2021	15052.1	23589.8	9071.63
544	Prevalence	High-income Asia Pacific	Both	45-49 years	Periodontal diseases	Rate	1990	20280.8	28468.6	12268.6
545	Prevalence	High-income Asia Pacific	Both	45-49 years	Periodontal diseases	Rate	2021	19974.4	28460.9	12802.1
546	Prevalence	High-income Asia Pacific	Both	50-54 years	Periodontal diseases	Rate	1990	24124.5	32926.4	14776.9
547	Prevalence	Central Asia	Both	20-24 years	Periodontal diseases	Rate	1990	1648.42	2860.17	820.339
548	Prevalence	Central Asia	Both	20-24 years	Periodontal diseases	Rate	2021	1544.67	2855.65	770.903
549	Prevalence	Southeast Asia	Both	20-24 years	Periodontal diseases	Rate	1990	2442.81	4148.9	1258.97
550	Prevalence	Southeast Asia	Both	20-24 years	Periodontal diseases	Rate	2021	1924.64	2910.56	1154.3
551	Prevalence	Oceania	Both	20-24 years	Periodontal diseases	Rate	1990	1525.14	2647.99	741.146
552	Prevalence	Oceania	Both	20-24 years	Periodontal diseases	Rate	2021	408.525	759.338	199.619
553	Prevalence	Global	Both	20-24 years	Periodontal diseases	Rate	1990	3725.74	6028.84	2073.11
554	Prevalence	Global	Both	20-24 years	Periodontal diseases	Rate	2021	4309.53	6191.41	2879.48
555	Prevalence	East Asia	Both	20-24 years	Periodontal diseases	Rate	1990	1237.5	2213.68	589.666
556	Prevalence	East Asia	Both	20-24 years	Periodontal diseases	Rate	2021	1343.15	2073.3	779.709
557	Prevalence	High-income Asia Pacific	Both	20-24 years	Periodontal diseases	Rate	1990	1218.52	2147.19	592.305
558	Prevalence	High-income Asia Pacific	Both	20-24 years	Periodontal diseases	Rate	2021	1175.61	2154.11	565.508
559	Prevalence	Central Europe	Both	20-24 years	Periodontal diseases	Rate	1990	1854.93	3168.45	948.064
560	Prevalence	Central Europe	Both	20-24 years	Periodontal diseases	Rate	2021	2023.57	3735.43	1035.07
561	Prevalence	Eastern Europe	Both	20-24 years	Periodontal diseases	Rate	1990	1982.19	3407.11	989.847
562	Prevalence	Eastern Europe	Both	20-24 years	Periodontal diseases	Rate	2021	1672.93	3162.27	825.255
563	Prevalence	Western Europe	Both	20-24 years	Periodontal diseases	Rate	1990	3695.98	5390.32	2475.82
564	Prevalence	Western Europe	Both	20-24 years	Periodontal diseases	Rate	2021	2407.18	4006.12	1276.84
565	Prevalence	Australasia	Both	20-24 years	Periodontal diseases	Rate	1990	1959.65	3412.84	969.962
566	Prevalence	Australasia	Both	20-24 years	Periodontal diseases	Rate	2021	2784.71	4974.97	1428.48
567	Prevalence	Southern Latin America	Both	20-24 years	Periodontal diseases	Rate	1990	3392.16	5835.54	1842.91
568	Prevalence	Southern Latin America	Both	20-24 years	Periodontal diseases	Rate	2021	3821.56	6629.23	1994.91
569	Prevalence	Caribbean	Both	20-24 years	Periodontal diseases	Rate	1990	5082.49	8434.87	2668.45
570	Prevalence	Caribbean	Both	20-24 years	Periodontal diseases	Rate	2021	4081.18	6885.42	2137.93
571	Prevalence	High-income North America	Both	20-24 years	Periodontal diseases	Rate	1990	1624.58	2833.58	804.309
572	Prevalence	High-income North America	Both	20-24 years	Periodontal diseases	Rate	2021	1590.72	2441.01	1003.22
573	Prevalence	Central Latin America	Both	20-24 years	Periodontal diseases	Rate	1990	4321.3	7290.26	2254.06
574	Prevalence	Central Latin America	Both	20-24 years	Periodontal diseases	Rate	2021	4305.49	6685.1	2585.25
575	Prevalence	North Africa and Middle East	Both	20-24 years	Periodontal diseases	Rate	1990	2815.28	4809.42	1456.45
576	Prevalence	North Africa and Middle East	Both	20-24 years	Periodontal diseases	Rate	2021	3129.56	5185.53	1808.11
577	Prevalence	Tropical Latin America	Both	20-24 years	Periodontal diseases	Rate	1990	2757.92	4647.11	1459.29
578	Prevalence	Tropical Latin America	Both	20-24 years	Periodontal diseases	Rate	2021	3235.25	4881.52	1938.93
579	Prevalence	South Asia	Both	20-24 years	Periodontal diseases	Rate	1990	6565.85	10747.2	3610.21
580	Prevalence	South Asia	Both	20-24 years	Periodontal diseases	Rate	2021	7310.14	10481.1	4873.8
581	Prevalence	Eastern Sub-Saharan Africa	Both	20-24 years	Periodontal diseases	Rate	1990	8584.31	14274.8	4666.2
582	Prevalence	Eastern Sub-Saharan Africa	Both	20-24 years	Periodontal diseases	Rate	2021	4446.64	6430.66	2905.08
583	Prevalence	Southern Sub-Saharan Africa	Both	20-24 years	Periodontal diseases	Rate	1990	1498.36	2639.05	746.2
584	Prevalence	Southern Sub-Saharan Africa	Both	20-24 years	Periodontal diseases	Rate	2021	1206.83	1779.28	775.934
585	Prevalence	Central Sub-Saharan Africa	Both	20-24 years	Periodontal diseases	Rate	1990	8045.34	13705.7	4350.85
586	Prevalence	Central Sub-Saharan Africa	Both	20-24 years	Periodontal diseases	Rate	2021	2604.86	4621.69	1320.77
587	Prevalence	Western Sub-Saharan Africa	Both	20-24 years	Periodontal diseases	Rate	1990	15506.4	22028.7	9490.82
588	Prevalence	Western Sub-Saharan Africa	Both	20-24 years	Periodontal diseases	Rate	2021	8374.9	11006	6088.69
