# Supplementary material for: Global, Regional, and National Levels and Trends in Burden of Dental Caries and Periodontal Disease from 1990 to 2035：Result From the Global Burden of Disease Study 2021
Source: Research Square preprint supplement (doi:10.21203/rs.3.rs-5609270/v1), 2025-04-02
Supplement: Supplementary file 12 [file 715c51036e0e0c76ddeb49b4.xlsx]

## Sheet: Sheet1
Exported data
	measure_name	location_name	sex_name	age_name	cause_name	metric_name	year	val	upper	lower
1	Prevalence	High-income Asia Pacific	Both	Age-standardized	Periodontal diseases	Rate	2021	8923.78	11355.4	6751.26
2	Prevalence	Western Europe	Both	Age-standardized	Periodontal diseases	Rate	2021	9467.68	11601.9	7449.71
3	Prevalence	Australasia	Both	Age-standardized	Periodontal diseases	Rate	2021	9967.23	13114.5	7355.51
4	Prevalence	Central Latin America	Both	Age-standardized	Periodontal diseases	Rate	2021	14280.7	16795.8	11767.3
5	Prevalence	Eastern Europe	Both	Age-standardized	Periodontal diseases	Rate	2021	10795.8	13746.9	8255.27
6	Prevalence	South Asia	Both	Age-standardized	Periodontal diseases	Rate	2021	17566.6	20136	14730.9
7	Prevalence	Central Sub-Saharan Africa	Both	Age-standardized	Periodontal diseases	Rate	2021	9567.48	12493	6904.73
8	Prevalence	Caribbean	Both	Age-standardized	Periodontal diseases	Rate	2021	13674.4	16870.1	10613.8
9	Prevalence	Southeast Asia	Both	Age-standardized	Periodontal diseases	Rate	2021	10039.1	11811.9	8384.41
10	Prevalence	East Asia	Both	Age-standardized	Periodontal diseases	Rate	2021	10708	12667.4	8785.26
11	Prevalence	Tropical Latin America	Both	Age-standardized	Periodontal diseases	Rate	2021	12379	14734.1	9951.57
12	Prevalence	North Africa and Middle East	Both	Age-standardized	Periodontal diseases	Rate	2021	11659.6	14095.5	9400.12
13	Prevalence	Eastern Sub-Saharan Africa	Both	Age-standardized	Periodontal diseases	Rate	2021	12722.8	15068.8	10423.4
14	Prevalence	Southern Latin America	Both	Age-standardized	Periodontal diseases	Rate	2021	13003.1	16290.9	9877.71
15	Prevalence	Western Sub-Saharan Africa	Both	Age-standardized	Periodontal diseases	Rate	2021	13335.6	15189.1	11504.7
16	Prevalence	Southern Sub-Saharan Africa	Both	Age-standardized	Periodontal diseases	Rate	2021	5650.83	7121.39	4446.02
17	Prevalence	Oceania	Both	Age-standardized	Periodontal diseases	Rate	2021	2247.62	3060.13	1641.52
18	Prevalence	Global	Both	Age-standardized	Periodontal diseases	Rate	2021	12498.3	14493.4	10526.8
19	Prevalence	Central Asia	Both	Age-standardized	Periodontal diseases	Rate	2021	9321.12	12000.9	6936.9
20	Prevalence	Central Europe	Both	Age-standardized	Periodontal diseases	Rate	2021	10046.9	12924.1	7649.52
21	Prevalence	High-income North America	Both	Age-standardized	Periodontal diseases	Rate	2021	9672.4	11544.6	7977.24
22	Prevalence	High SDI	Both	Age-standardized	Periodontal diseases	Rate	2021	10139.7	12189	8221
23	Prevalence	High-middle SDI	Both	Age-standardized	Periodontal diseases	Rate	2021	10613.5	12735	8609.35
24	Prevalence	Low-middle SDI	Both	Age-standardized	Periodontal diseases	Rate	2021	15252.3	17553.5	12777.2
25	Prevalence	Low SDI	Both	Age-standardized	Periodontal diseases	Rate	2021	13488.1	15555.4	11346.7
26	Prevalence	Middle SDI	Both	Age-standardized	Periodontal diseases	Rate	2021	12326.6	14258.4	10492
27	Prevalence	Central Asia	Both	Age-standardized	Caries of permanent teeth	Rate	2021	36158.5	42091.6	30985.7
28	Prevalence	Southeast Asia	Both	Age-standardized	Caries of permanent teeth	Rate	2021	29770	34652.2	25477.1
29	Prevalence	High-income North America	Both	Age-standardized	Caries of permanent teeth	Rate	2021	19279.6	22885.6	16329.5
30	Prevalence	Caribbean	Both	Age-standardized	Caries of permanent teeth	Rate	2021	34955.7	39072.8	31393.6
31	Prevalence	South Asia	Both	Age-standardized	Caries of permanent teeth	Rate	2021	30711	35651.6	26737.4
32	Prevalence	Eastern Sub-Saharan Africa	Both	Age-standardized	Caries of permanent teeth	Rate	2021	31658.7	36022.4	27831
33	Prevalence	Central Sub-Saharan Africa	Both	Age-standardized	Caries of permanent teeth	Rate	2021	32084.2	38158.9	26431.2
34	Prevalence	Southern Sub-Saharan Africa	Both	Age-standardized	Caries of permanent teeth	Rate	2021	25097	29965.7	21334.2
35	Prevalence	Western Sub-Saharan Africa	Both	Age-standardized	Caries of permanent teeth	Rate	2021	25347.7	29425.9	21995.9
36	Prevalence	East Asia	Both	Age-standardized	Caries of permanent teeth	Rate	2021	19407.1	23723.1	16361.5
37	Prevalence	Global	Both	Age-standardized	Caries of permanent teeth	Rate	2021	27543.3	32018.1	23976
38	Prevalence	Oceania	Both	Age-standardized	Caries of permanent teeth	Rate	2021	39790.6	46817.4	33924.1
39	Prevalence	Central Europe	Both	Age-standardized	Caries of permanent teeth	Rate	2021	35601	40315.7	31052.1
40	Prevalence	Middle SDI	Both	Age-standardized	Caries of permanent teeth	Rate	2021	27257.5	31966.2	23565
41	Prevalence	Low-middle SDI	Both	Age-standardized	Caries of permanent teeth	Rate	2021	29891.2	34837.2	25921.3
42	Prevalence	High SDI	Both	Age-standardized	Caries of permanent teeth	Rate	2021	23472.2	26991.5	20786.3
43	Prevalence	High-middle SDI	Both	Age-standardized	Caries of permanent teeth	Rate	2021	26692	31381.8	23040.4
44	Prevalence	Low SDI	Both	Age-standardized	Caries of permanent teeth	Rate	2021	31719.1	36261.5	27960.3
45	Prevalence	Eastern Europe	Both	Age-standardized	Caries of permanent teeth	Rate	2021	30409.5	35460.7	26109.3
46	Prevalence	High-income Asia Pacific	Both	Age-standardized	Caries of permanent teeth	Rate	2021	14590.9	17035.5	12662.9
47	Prevalence	Australasia	Both	Age-standardized	Caries of permanent teeth	Rate	2021	25919.9	31390.2	21528
48	Prevalence	Western Europe	Both	Age-standardized	Caries of permanent teeth	Rate	2021	31592.5	35780	28227.4
49	Prevalence	Southern Latin America	Both	Age-standardized	Caries of permanent teeth	Rate	2021	41968.6	46385.4	37634.4
50	Prevalence	Central Latin America	Both	Age-standardized	Caries of permanent teeth	Rate	2021	29071	34084.2	24810.5
51	Prevalence	Tropical Latin America	Both	Age-standardized	Caries of permanent teeth	Rate	2021	31305.6	36281.5	26932.2
52	Prevalence	North Africa and Middle East	Both	Age-standardized	Caries of permanent teeth	Rate	2021	33924.9	39163	29422.7
53	Prevalence	Southeast Asia	Both	Age-standardized	Caries of deciduous teeth	Rate	2021	8898.23	10547.3	7377.69
54	Prevalence	Southern Latin America	Both	Age-standardized	Caries of deciduous teeth	Rate	2021	7412.4	9239.84	5884.43
55	Prevalence	High-income North America	Both	Age-standardized	Caries of deciduous teeth	Rate	2021	6131.77	7495.01	4836.37
56	Prevalence	South Asia	Both	Age-standardized	Caries of deciduous teeth	Rate	2021	7743.24	8999.56	6450.26
57	Prevalence	Central Sub-Saharan Africa	Both	Age-standardized	Caries of deciduous teeth	Rate	2021	5836.05	7266.19	4359.13
58	Prevalence	Caribbean	Both	Age-standardized	Caries of deciduous teeth	Rate	2021	7760.8	8983.62	6539.68
59	Prevalence	Western Sub-Saharan Africa	Both	Age-standardized	Caries of deciduous teeth	Rate	2021	6924.38	8340.24	5539.39
60	Prevalence	Tropical Latin America	Both	Age-standardized	Caries of deciduous teeth	Rate	2021	7705.41	9396	6076.1
61	Prevalence	East Asia	Both	Age-standardized	Caries of deciduous teeth	Rate	2021	8371.49	9868.18	6968.42
62	Prevalence	Oceania	Both	Age-standardized	Caries of deciduous teeth	Rate	2021	8914.78	10654.7	7279.21
63	Prevalence	Global	Both	Age-standardized	Caries of deciduous teeth	Rate	2021	7548.04	8775.83	6290.61
64	Prevalence	Southern Sub-Saharan Africa	Both	Age-standardized	Caries of deciduous teeth	Rate	2021	6959.22	8688.31	5477.83
65	Prevalence	Eastern Sub-Saharan Africa	Both	Age-standardized	Caries of deciduous teeth	Rate	2021	7045.12	8137.05	5804.6
66	Prevalence	Central Latin America	Both	Age-standardized	Caries of deciduous teeth	Rate	2021	7150.59	8312.18	5944.43
67	Prevalence	North Africa and Middle East	Both	Age-standardized	Caries of deciduous teeth	Rate	2021	7446.43	8668.07	6242.55
68	Prevalence	Central Asia	Both	Age-standardized	Caries of deciduous teeth	Rate	2021	8950.71	10685.2	7456.7
69	Prevalence	Central Europe	Both	Age-standardized	Caries of deciduous teeth	Rate	2021	8918.16	10550	7373.69
70	Prevalence	Low-middle SDI	Both	Age-standardized	Caries of deciduous teeth	Rate	2021	7340.64	8511.13	6072.71
71	Prevalence	High SDI	Both	Age-standardized	Caries of deciduous teeth	Rate	2021	6257.88	7530.88	5147.34
72	Prevalence	Middle SDI	Both	Age-standardized	Caries of deciduous teeth	Rate	2021	8267.38	9613.96	6978.71
73	Prevalence	High-middle SDI	Both	Age-standardized	Caries of deciduous teeth	Rate	2021	8132.91	9703.56	6697.29
74	Prevalence	Low SDI	Both	Age-standardized	Caries of deciduous teeth	Rate	2021	7116.18	8255.52	5899.87
75	Prevalence	High-income Asia Pacific	Both	Age-standardized	Caries of deciduous teeth	Rate	2021	6583.77	7585.11	5538.7
76	Prevalence	Eastern Europe	Both	Age-standardized	Caries of deciduous teeth	Rate	2021	8931.26	10556.6	7458.36
77	Prevalence	Western Europe	Both	Age-standardized	Caries of deciduous teeth	Rate	2021	4838.87	6135.47	3811.14
78	Prevalence	Australasia	Both	Age-standardized	Caries of deciduous teeth	Rate	2021	8145.16	9346.44	6853.38
