# Supplementary material for: Global, Regional, and National Levels and Trends in Burden of Dental Caries and Periodontal Disease from 1990 to 2035：Result From the Global Burden of Disease Study 2021
Source: Research Square preprint supplement (doi:10.21203/rs.3.rs-5609270/v1), 2025-04-02
Supplement: Supplementary file 13 [file 74dbca8c920589f8cde5f006.xlsx]

## Sheet: Sheet1
Exported data
	measure_name	location_name	sex_name	age_name	cause_name	metric_name	year	val	upper	lower
1	Incidence	Global	Male	70+ years	Periodontal diseases	Number	2021	4.09197e+06	5.023e+06	2.81702e+06
2	Incidence	Global	Female	70+ years	Periodontal diseases	Number	2021	5.24669e+06	6.36766e+06	3.69513e+06
3	Incidence	Global	Male	70+ years	Periodontal diseases	Percent	2021	0.00428796	0.00534063	0.00298749
4	Incidence	Global	Female	70+ years	Periodontal diseases	Percent	2021	0.00408993	0.0050573	0.00287888
5	Incidence	Global	Male	70+ years	Periodontal diseases	Rate	2021	1882.03	2310.24	1295.64
6	Incidence	Global	Female	70+ years	Periodontal diseases	Rate	2021	1894.49	2299.25	1334.25
7	Incidence	Global	Male	5-9 years	Periodontal diseases	Number	2021	0	0	0
8	Incidence	Global	Female	5-9 years	Periodontal diseases	Number	2021	0	0	0
9	Incidence	Global	Male	5-9 years	Periodontal diseases	Percent	2021	0	0	0
10	Incidence	Global	Female	5-9 years	Periodontal diseases	Percent	2021	0	0	0
11	Incidence	Global	Male	5-9 years	Periodontal diseases	Rate	2021	0	0	0
12	Incidence	Global	Female	5-9 years	Periodontal diseases	Rate	2021	0	0	0
13	Incidence	Global	Male	10-14 years	Periodontal diseases	Number	2021	0	0	0
14	Incidence	Global	Female	10-14 years	Periodontal diseases	Number	2021	0	0	0
15	Incidence	Global	Male	10-14 years	Periodontal diseases	Percent	2021	0	0	0
16	Incidence	Global	Female	10-14 years	Periodontal diseases	Percent	2021	0	0	0
17	Incidence	Global	Male	10-14 years	Periodontal diseases	Rate	2021	0	0	0
18	Incidence	Global	Female	10-14 years	Periodontal diseases	Rate	2021	0	0	0
19	Incidence	Global	Male	15-19 years	Periodontal diseases	Number	2021	1.42329e+06	2.23767e+06	854448
20	Incidence	Global	Female	15-19 years	Periodontal diseases	Number	2021	1.29823e+06	2.03411e+06	773396
21	Incidence	Global	Male	15-19 years	Periodontal diseases	Percent	2021	0.00102173	0.00166479	0.000605763
22	Incidence	Global	Female	15-19 years	Periodontal diseases	Percent	2021	0.000915401	0.00147673	0.000539422
23	Incidence	Global	Male	15-19 years	Periodontal diseases	Rate	2021	444.32	698.553	266.74
24	Incidence	Global	Female	15-19 years	Periodontal diseases	Rate	2021	427.542	669.885	254.7
25	Incidence	Global	Male	25-29 years	Periodontal diseases	Number	2021	4.12104e+06	6.04621e+06	2.49868e+06
26	Incidence	Global	Female	25-29 years	Periodontal diseases	Number	2021	3.95765e+06	5.82671e+06	2.4026e+06
27	Incidence	Global	Male	25-29 years	Periodontal diseases	Percent	2021	0.00321028	0.00481698	0.00192415
28	Incidence	Global	Female	25-29 years	Periodontal diseases	Percent	2021	0.00279299	0.00420344	0.00168263
29	Incidence	Global	Male	25-29 years	Periodontal diseases	Rate	2021	1385.89	2033.32	840.298
30	Incidence	Global	Female	25-29 years	Periodontal diseases	Rate	2021	1360.08	2002.39	825.671
31	Incidence	Global	Male	30-34 years	Periodontal diseases	Number	2021	4.81045e+06	6.9011e+06	3.09965e+06
32	Incidence	Global	Female	30-34 years	Periodontal diseases	Number	2021	4.59938e+06	6.59919e+06	2.96359e+06
33	Incidence	Global	Male	30-34 years	Periodontal diseases	Percent	2021	0.00376603	0.00541794	0.00232056
34	Incidence	Global	Female	30-34 years	Periodontal diseases	Percent	2021	0.00323382	0.00465485	0.00201331
35	Incidence	Global	Male	30-34 years	Periodontal diseases	Rate	2021	1574.36	2258.59	1014.45
36	Incidence	Global	Female	30-34 years	Periodontal diseases	Rate	2021	1538.61	2207.6	991.396
37	Incidence	Global	Male	35-39 years	Periodontal diseases	Number	2021	4.95925e+06	6.95871e+06	3.20648e+06
38	Incidence	Global	Female	35-39 years	Periodontal diseases	Number	2021	4.75713e+06	6.64646e+06	3.06049e+06
39	Incidence	Global	Male	35-39 years	Periodontal diseases	Percent	2021	0.00422725	0.00594364	0.00269394
40	Incidence	Global	Female	35-39 years	Periodontal diseases	Percent	2021	0.00361637	0.00506631	0.00230841
41	Incidence	Global	Male	35-39 years	Periodontal diseases	Rate	2021	1751.99	2458.36	1132.78
42	Incidence	Global	Female	35-39 years	Periodontal diseases	Rate	2021	1712.41	2392.51	1101.68
43	Incidence	Global	Male	40-44 years	Periodontal diseases	Number	2021	4.6524e+06	6.24776e+06	2.86685e+06
44	Incidence	Global	Female	40-44 years	Periodontal diseases	Number	2021	4.50163e+06	6.07687e+06	2.77071e+06
45	Incidence	Global	Male	40-44 years	Periodontal diseases	Percent	2021	0.00451535	0.00624394	0.00271573
46	Incidence	Global	Female	40-44 years	Periodontal diseases	Percent	2021	0.00393312	0.00541376	0.00235865
47	Incidence	Global	Male	40-44 years	Periodontal diseases	Rate	2021	1845.01	2477.69	1136.91
48	Incidence	Global	Female	40-44 years	Periodontal diseases	Rate	2021	1814.52	2449.46	1116.82
49	Incidence	Global	Male	45-49 years	Periodontal diseases	Number	2021	4.46278e+06	5.7832e+06	2.94347e+06
50	Incidence	Global	Female	45-49 years	Periodontal diseases	Number	2021	4.38752e+06	5.71925e+06	2.89511e+06
51	Incidence	Global	Male	45-49 years	Periodontal diseases	Percent	2021	0.00478826	0.00636704	0.0031765
52	Incidence	Global	Female	45-49 years	Periodontal diseases	Percent	2021	0.00430145	0.00575107	0.00283404
53	Incidence	Global	Male	45-49 years	Periodontal diseases	Rate	2021	1876.2	2431.32	1237.47
54	Incidence	Global	Female	45-49 years	Periodontal diseases	Rate	2021	1861.94	2427.09	1228.6
55	Incidence	Global	Male	50-54 years	Periodontal diseases	Number	2021	4.18036e+06	5.48439e+06	2.7198e+06
56	Incidence	Global	Female	50-54 years	Periodontal diseases	Number	2021	4.1864e+06	5.51833e+06	2.73266e+06
57	Incidence	Global	Male	50-54 years	Periodontal diseases	Percent	2021	0.00491781	0.00658904	0.00317741
58	Incidence	Global	Female	50-54 years	Periodontal diseases	Percent	2021	0.00451787	0.00604296	0.00287388
59	Incidence	Global	Male	50-54 years	Periodontal diseases	Rate	2021	1883.21	2470.66	1225.24
60	Incidence	Global	Female	50-54 years	Periodontal diseases	Rate	2021	1877.79	2475.22	1225.72
61	Incidence	Global	Male	55-59 years	Periodontal diseases	Number	2021	3.58427e+06	4.73119e+06	2.37235e+06
62	Incidence	Global	Female	55-59 years	Periodontal diseases	Number	2021	3.6926e+06	4.88969e+06	2.44075e+06
63	Incidence	Global	Male	55-59 years	Periodontal diseases	Percent	2021	0.00484144	0.0065189	0.0031474
64	Incidence	Global	Female	55-59 years	Periodontal diseases	Percent	2021	0.0045019	0.00605196	0.0029558
65	Incidence	Global	Male	55-59 years	Periodontal diseases	Rate	2021	1840.69	2429.69	1218.31
66	Incidence	Global	Female	55-59 years	Periodontal diseases	Rate	2021	1837.08	2432.64	1214.28
67	Incidence	Global	Male	60-64 years	Periodontal diseases	Number	2021	2.8228e+06	3.77778e+06	1.86781e+06
68	Incidence	Global	Female	60-64 years	Periodontal diseases	Number	2021	2.98097e+06	3.98282e+06	1.97084e+06
69	Incidence	Global	Male	60-64 years	Periodontal diseases	Percent	2021	0.00464594	0.00646624	0.00302615
70	Incidence	Global	Female	60-64 years	Periodontal diseases	Percent	2021	0.00434439	0.00599414	0.00283263
71	Incidence	Global	Male	60-64 years	Periodontal diseases	Rate	2021	1814.88	2428.87	1200.88
72	Incidence	Global	Female	60-64 years	Periodontal diseases	Rate	2021	1812.02	2421.01	1198
73	Incidence	Global	Male	65-69 years	Periodontal diseases	Number	2021	2.43697e+06	3.23141e+06	1.56839e+06
74	Incidence	Global	Female	65-69 years	Periodontal diseases	Number	2021	2.6659e+06	3.54201e+06	1.6903e+06
75	Incidence	Global	Male	65-69 years	Periodontal diseases	Percent	2021	0.00464996	0.00625544	0.00294615
76	Incidence	Global	Female	65-69 years	Periodontal diseases	Percent	2021	0.00437007	0.00593696	0.00272756
77	Incidence	Global	Male	65-69 years	Periodontal diseases	Rate	2021	1848.52	2451.14	1189.68
78	Incidence	Global	Female	65-69 years	Periodontal diseases	Rate	2021	1851.21	2459.58	1173.74
79	Incidence	Global	Male	20-24 years	Periodontal diseases	Number	2021	2.9796e+06	4.39601e+06	1.86309e+06
80	Incidence	Global	Female	20-24 years	Periodontal diseases	Number	2021	2.81424e+06	4.17758e+06	1.75778e+06
81	Incidence	Global	Male	20-24 years	Periodontal diseases	Percent	2021	0.00225687	0.00335275	0.00134688
82	Incidence	Global	Female	20-24 years	Periodontal diseases	Percent	2021	0.00199639	0.00298036	0.00119142
83	Incidence	Global	Male	20-24 years	Periodontal diseases	Rate	2021	982.051	1448.89	614.057
84	Incidence	Global	Female	20-24 years	Periodontal diseases	Rate	2021	958.032	1422.15	598.389
