# Supplementary material for: Global, Regional, and National Levels and Trends in Burden of Dental Caries and Periodontal Disease from 1990 to 2035：Result From the Global Burden of Disease Study 2021
Source: Research Square preprint supplement (doi:10.21203/rs.3.rs-5609270/v1), 2025-04-02
Supplement: Supplementary file 14 [file 7a8e18a7ae7ab67d9a0c5242.xlsx]

## Sheet: Sheet1
Exported data
	val	sd	Time	group	low_50	up_50	low_60	up_60	low_70	up_70	low_80	up_80	low_95	up_95
1	18511.5	0.838203	1990	ASR	18510.9	18512	18510.8	18512.2	18510.6	18512.3	18510.4	18512.5	18509.8	18513.1
2	18373.7	0.826069	1991	ASR	18373.2	18374.3	18373	18374.4	18372.9	18374.6	18372.7	18374.8	18372.1	18375.3
3	18245.8	0.814195	1992	ASR	18245.2	18246.3	18245.1	18246.4	18244.9	18246.6	18244.7	18246.8	18244.2	18247.3
4	18136.6	0.803172	1993	ASR	18136	18137.1	18135.9	18137.2	18135.7	18137.4	18135.5	18137.6	18135	18138.1
5	18056.5	0.793053	1994	ASR	18056	18057.1	18055.9	18057.2	18055.7	18057.4	18055.5	18057.6	18055	18058.1
6	18016.2	0.784529	1995	ASR	18015.7	18016.7	18015.6	18016.9	18015.4	18017	18015.2	18017.2	18014.7	18017.8
7	17994.9	0.776208	1996	ASR	17994.4	17995.4	17994.2	17995.5	17994.1	17995.7	17993.9	17995.9	17993.4	17996.4
8	17966.5	0.767451	1997	ASR	17966	17967	17965.8	17967.1	17965.7	17967.3	17965.5	17967.5	17965	17968
9	17937.7	0.758827	1998	ASR	17937.2	17938.2	17937.1	17938.4	17936.9	17938.5	17936.8	17938.7	17936.2	17939.2
10	17921.9	0.750478	1999	ASR	17921.3	17922.4	17921.2	17922.5	17921.1	17922.6	17920.9	17922.8	17920.4	17923.3
11	17925.5	0.742981	2000	ASR	17925	17926	17924.8	17926.1	17924.7	17926.2	17924.5	17926.4	17924	17926.9
12	17942.7	0.735602	2001	ASR	17942.2	17943.2	17942	17943.3	17941.9	17943.4	17941.7	17943.6	17941.2	17944.1
13	17960.3	0.727905	2002	ASR	17959.8	17960.8	17959.7	17960.9	17959.6	17961.1	17959.4	17961.3	17958.9	17961.8
14	17980.9	0.720293	2003	ASR	17980.4	17981.3	17980.2	17981.5	17980.1	17981.6	17979.9	17981.8	17979.4	17982.3
15	18006	0.712729	2004	ASR	18005.5	18006.5	18005.4	18006.6	18005.2	18006.7	18005.1	18006.9	18004.6	18007.4
16	18031.4	0.705524	2005	ASR	18030.9	18031.8	18030.8	18032	18030.6	18032.1	18030.5	18032.3	18030	18032.8
17	17930	0.695966	2006	ASR	17929.5	17930.5	17929.4	17930.6	17929.3	17930.7	17929.1	17930.9	17928.6	17931.4
18	17650.8	0.682994	2007	ASR	17650.3	17651.3	17650.2	17651.4	17650.1	17651.5	17649.9	17651.7	17649.5	17652.1
19	17311.8	0.668967	2008	ASR	17311.3	17312.2	17311.2	17312.3	17311.1	17312.4	17310.9	17312.6	17310.4	17313.1
20	17037.9	0.656311	2009	ASR	17037.5	17038.4	17037.4	17038.5	17037.3	17038.6	17037.1	17038.8	17036.6	17039.2
21	16957.5	0.647757	2010	ASR	16957.1	16958	16957	16958.1	16956.8	16958.2	16956.7	16958.4	16956.3	16958.8
22	17175.1	0.645054	2011	ASR	17174.7	17175.5	17174.6	17175.7	17174.4	17175.8	17174.3	17175.9	17173.9	17176.4
23	17606.5	0.64617	2012	ASR	17606	17606.9	17605.9	17607	17605.8	17607.1	17605.6	17607.3	17605.2	17607.7
24	18104.5	0.648321	2013	ASR	18104.1	18105	18104	18105.1	18103.8	18105.2	18103.7	18105.3	18103.2	18105.8
25	18527.6	0.649039	2014	ASR	18527.1	18528	18527	18528.1	18526.9	18528.2	18526.7	18528.4	18526.3	18528.8
26	18735.5	0.646126	2015	ASR	18735.1	18736	18735	18736.1	18734.8	18736.2	18734.7	18736.3	18734.3	18736.8
27	18749.3	0.640322	2016	ASR	18748.8	18749.7	18748.7	18749.8	18748.6	18749.9	18748.5	18750.1	18748	18750.5
28	18712.4	0.634323	2017	ASR	18712	18712.9	18711.9	18713	18711.8	18713.1	18711.6	18713.2	18711.2	18713.7
29	18672.9	0.628488	2018	ASR	18672.5	18673.3	18672.4	18673.4	18672.2	18673.5	18672.1	18673.7	18671.7	18674.1
30	18676.4	0.623854	2019	ASR	18676	18676.8	18675.9	18676.9	18675.8	18677	18675.6	18677.2	18675.2	18677.6
31	18690.4	0.619533	2020	ASR	18690	18690.8	18689.9	18690.9	18689.8	18691	18689.6	18691.2	18689.2	18691.6
32	18714.6	0.616026	2021	ASR	18714.2	18715.1	18714.1	18715.2	18714	18715.3	18713.9	18715.4	18713.4	18715.9
33	18740.9	257.219	2022	ASR	18567.5	18914.2	18524.5	18957.2	18474.4	19007.3	18411.1	19070.6	18236.7	19245
34	18782.6	337.339	2023	ASR	18555.3	19010	18498.9	19066.3	18433.1	19132.1	18350.2	19215.1	18121.4	19443.8
35	18821.3	405.519	2024	ASR	18548	19094.6	18480.3	19162.4	18401.2	19241.4	18301.4	19341.2	18026.5	19616.1
36	18856.6	466.997	2025	ASR	18541.8	19171.3	18463.8	19249.3	18372.8	19340.4	18257.9	19455.3	17941.3	19771.9
37	18891.1	524.36	2026	ASR	18537.7	19244.5	18450.1	19332.1	18347.9	19434.3	18218.9	19563.3	17863.4	19918.8
38	18923.4	579.133	2027	ASR	18533.1	19313.8	18436.4	19410.5	18323.5	19523.4	18181	19665.9	17788.4	20058.5
39	18951.5	631.756	2028	ASR	18525.7	19377.3	18420.2	19482.8	18297	19606	18141.6	19761.4	17713.2	20189.7
40	18974.4	682.629	2029	ASR	18514.3	19434.5	18400.3	19548.5	18267.2	19681.6	18099.3	19849.5	17636.5	20312.4
41	18992.5	732.145	2030	ASR	18499	19486	18376.8	19608.2	18234	19751	18053.9	19931.1	17557.5	20427.5
42	19007.7	780.825	2031	ASR	18481.4	19534	18351	19664.4	18198.8	19816.7	18006.7	20008.7	17477.3	20538.1
43	19019.2	829.156	2032	ASR	18460.3	19578	18321.8	19716.5	18160.1	19878.2	17956.2	20082.1	17394	20644.3
44	19025.8	877.156	2033	ASR	18434.6	19617	18288.1	19763.5	18117.1	19934.5	17901.3	20150.3	17306.6	20745
45	19028	924.983	2034	ASR	18404.5	19651.4	18250.1	19805.9	18069.7	19986.3	17842.2	20213.8	17215	20840.9
46	19025.4	972.838	2035	ASR	18369.7	19681.1	18207.3	19843.6	18017.6	20033.3	17778.3	20272.6	17118.7	20932.2
