# Supplementary material for: Global, Regional, and National Levels and Trends in Burden of Dental Caries and Periodontal Disease from 1990 to 2035：Result From the Global Burden of Disease Study 2021
Source: Research Square preprint supplement (doi:10.21203/rs.3.rs-5609270/v1), 2025-04-02
Supplement: Supplementary file 15 [file 8306b4777b829537644cce80.xlsx]

## Sheet: Sheet1
Exported data
	measure_id	measure_name	location_id	location_name	sex_id	sex_name	age_id	age_name	cause_id	cause_name	metric_id	metric_name	year_start	year_end	val	upper	lower
1	6	Incidence	27	Independent State of Samoa	3	Both	27	Age-standardized	683	Periodontal diseases	3	Rate	1990	2021	-71.2774	-59.1323	-80.368
2	6	Incidence	5	East Asia	3	Both	27	Age-standardized	683	Periodontal diseases	3	Rate	1990	2021	-3.19215	9.51147	-11.7908
3	6	Incidence	64	High-income	3	Both	27	Age-standardized	683	Periodontal diseases	3	Rate	1990	2021	-3.93504	22.3244	-21.8308
4	6	Incidence	69	Republic of Singapore	3	Both	27	Age-standardized	683	Periodontal diseases	3	Rate	1990	2021	5.23198	44.368	-21.9801
5	6	Incidence	1	Global	3	Both	27	Age-standardized	683	Periodontal diseases	3	Rate	1990	2021	0.00556369	19.21	-13.1747
6	6	Incidence	37	Kyrgyz Republic	3	Both	27	Age-standardized	683	Periodontal diseases	3	Rate	1990	2021	-9.74631	23.3837	-33.9622
7	6	Incidence	59	Republic of Latvia	3	Both	27	Age-standardized	683	Periodontal diseases	3	Rate	1990	2021	-0.155698	34.1663	-22.5409
8	6	Incidence	10	Kingdom of Cambodia	3	Both	27	Age-standardized	683	Periodontal diseases	3	Rate	1990	2021	15.7825	23.0955	9.21655
9	6	Incidence	42	Central Europe	3	Both	27	Age-standardized	683	Periodontal diseases	3	Rate	1990	2021	5.22782	42.9816	-19.095
10	6	Incidence	74	Principality of Andorra	3	Both	27	Age-standardized	683	Periodontal diseases	3	Rate	1990	2021	-6.94444	10.9624	-22.7219
11	6	Incidence	20	Socialist Republic of Viet Nam	3	Both	27	Age-standardized	683	Periodontal diseases	3	Rate	1990	2021	27.7681	93.5136	-10.7739
12	6	Incidence	91	Portuguese Republic	3	Both	27	Age-standardized	683	Periodontal diseases	3	Rate	1990	2021	-5.26212	33.1691	-33.3642
13	6	Incidence	96	Southern Latin America	3	Both	27	Age-standardized	683	Periodontal diseases	3	Rate	1990	2021	2.31712	37.9916	-20.8831
14	6	Incidence	30	Republic of Vanuatu	3	Both	27	Age-standardized	683	Periodontal diseases	3	Rate	1990	2021	-73.6684	-61.4125	-82.1159
15	6	Incidence	32	Central Asia	3	Both	27	Age-standardized	683	Periodontal diseases	3	Rate	1990	2021	-3.03764	30.01	-26.2405
16	6	Incidence	52	Romania	3	Both	27	Age-standardized	683	Periodontal diseases	3	Rate	1990	2021	6.15116	48.6617	-20.6315
17	6	Incidence	133	Bolivarian Republic of Venezuela	3	Both	27	Age-standardized	683	Periodontal diseases	3	Rate	1990	2021	-4.69245	8.10573	-16.3348
18	6	Incidence	57	Republic of Belarus	3	Both	27	Age-standardized	683	Periodontal diseases	3	Rate	1990	2021	-1.69307	31.7601	-23.827
19	6	Incidence	15	Republic of the Union of Myanmar	3	Both	27	Age-standardized	683	Periodontal diseases	3	Rate	1990	2021	-13.5159	25.8075	-38.6476
20	6	Incidence	155	Turkey	3	Both	27	Age-standardized	683	Periodontal diseases	3	Rate	1990	2021	69.7879	145.588	28.7321
21	6	Incidence	8	Taiwan (Province of China)	3	Both	27	Age-standardized	683	Periodontal diseases	3	Rate	1990	2021	1.79024	5.87874	-1.80631
22	6	Incidence	138	North Africa and Middle East	3	Both	27	Age-standardized	683	Periodontal diseases	3	Rate	1990	2021	13.3957	43.3696	-6.04842
23	6	Incidence	101	Canada	3	Both	27	Age-standardized	683	Periodontal diseases	3	Rate	1990	2021	0.360878	28.6021	-18.9874
24	6	Incidence	47	Czech Republic	3	Both	27	Age-standardized	683	Periodontal diseases	3	Rate	1990	2021	1.67867	41.1923	-22.7934
25	6	Incidence	45	Republic of Bulgaria	3	Both	27	Age-standardized	683	Periodontal diseases	3	Rate	1990	2021	1.7116	48.5442	-27.7658
26	6	Incidence	62	Russian Federation	3	Both	27	Age-standardized	683	Periodontal diseases	3	Rate	1990	2021	-4.46588	25.723	-24.9034
27	6	Incidence	25	Federated States of Micronesia	3	Both	27	Age-standardized	683	Periodontal diseases	3	Rate	1990	2021	-72.8355	-60.2527	-81.2479
28	6	Incidence	198	Zimbabwe	3	Both	27	Age-standardized	683	Periodontal diseases	3	Rate	1990	2021	-6.21612	-1.86048	-10.5586
29	6	Incidence	67	Japan	3	Both	27	Age-standardized	683	Periodontal diseases	3	Rate	1990	2021	3.10657	44.5161	-22.4092
30	6	Incidence	72	New Zealand	3	Both	27	Age-standardized	683	Periodontal diseases	3	Rate	1990	2021	28.5317	79.1764	-0.76606
31	6	Incidence	123	Republic of Peru	3	Both	27	Age-standardized	683	Periodontal diseases	3	Rate	1990	2021	0.898555	13.2163	-10.9295
32	6	Incidence	79	Republic of Finland	3	Both	27	Age-standardized	683	Periodontal diseases	3	Rate	1990	2021	3.3446	39.7042	-17.6405
33	6	Incidence	193	Botswana	3	Both	27	Age-standardized	683	Periodontal diseases	3	Rate	1990	2021	-21.2583	23.4014	-47.4988
34	6	Incidence	128	Republic of Guatemala	3	Both	27	Age-standardized	683	Periodontal diseases	3	Rate	1990	2021	0.276311	34.995	-21.99
35	6	Incidence	89	Kingdom of the Netherlands	3	Both	27	Age-standardized	683	Periodontal diseases	3	Rate	1990	2021	-8.12098	29.6273	-33.6335
36	6	Incidence	106	Commonwealth of the Bahamas	3	Both	27	Age-standardized	683	Periodontal diseases	3	Rate	1990	2021	-7.23125	16.2193	-23.8427
37	6	Incidence	104	Caribbean	3	Both	27	Age-standardized	683	Periodontal diseases	3	Rate	1990	2021	-8.12858	19.3154	-26.5197
38	6	Incidence	170	Congo	3	Both	27	Age-standardized	683	Periodontal diseases	3	Rate	1990	2021	-28.1548	-4.1293	-45.205
39	6	Incidence	158	South Asia	3	Both	27	Age-standardized	683	Periodontal diseases	3	Rate	1990	2021	1.35795	20.9889	-12.9744
40	6	Incidence	99	Eastern Republic of Uruguay	3	Both	27	Age-standardized	683	Periodontal diseases	3	Rate	1990	2021	1.72318	28.3032	-17.5055
41	6	Incidence	116	Saint Lucia	3	Both	27	Age-standardized	683	Periodontal diseases	3	Rate	1990	2021	-5.51072	22.8864	-24.9329
42	6	Incidence	84	Ireland	3	Both	27	Age-standardized	683	Periodontal diseases	3	Rate	1990	2021	13.4023	75.0916	-23.6465
43	6	Incidence	18	Kingdom of Thailand	3	Both	27	Age-standardized	683	Periodontal diseases	3	Rate	1990	2021	11.7269	44.2433	-11.5389
44	6	Incidence	187	Somalia	3	Both	27	Age-standardized	683	Periodontal diseases	3	Rate	1990	2021	-50.6211	-29.83	-65.1762
45	6	Incidence	94	Swiss Confederation	3	Both	27	Age-standardized	683	Periodontal diseases	3	Rate	1990	2021	-8.84549	26.5457	-32.5043
46	6	Incidence	35	Georgia	3	Both	27	Age-standardized	683	Periodontal diseases	3	Rate	1990	2021	-5.54621	26.9398	-27.5109
47	6	Incidence	13	Malaysia	3	Both	27	Age-standardized	683	Periodontal diseases	3	Rate	1990	2021	-21.9528	6.36964	-40.8779
48	6	Incidence	131	Republic of Nicaragua	3	Both	27	Age-standardized	683	Periodontal diseases	3	Rate	1990	2021	-1.422	13.6485	-14.0788
49	6	Incidence	40	Turkmenistan	3	Both	27	Age-standardized	683	Periodontal diseases	3	Rate	1990	2021	1.0245	36.9055	-21.8961
50	6	Incidence	55	Republic of Slovenia	3	Both	27	Age-standardized	683	Periodontal diseases	3	Rate	1990	2021	-2.70601	17.7991	-19.1395
51	6	Incidence	165	Pakistan	3	Both	27	Age-standardized	683	Periodontal diseases	3	Rate	1990	2021	-2.38735	16.0573	-17.7228
52	6	Incidence	28	Solomon Islands	3	Both	27	Age-standardized	683	Periodontal diseases	3	Rate	1990	2021	-73.343	-60.2657	-81.8747
53	6	Incidence	23	Republic of Kiribati	3	Both	27	Age-standardized	683	Periodontal diseases	3	Rate	1990	2021	-74.5404	-62.9179	-82.5491
54	6	Incidence	148	Morocco	3	Both	27	Age-standardized	683	Periodontal diseases	3	Rate	1990	2021	-1.92448	25.2755	-20.4951
55	6	Incidence	160	Afghanistan	3	Both	27	Age-standardized	683	Periodontal diseases	3	Rate	1990	2021	6.38209	53.0825	-22.584
56	6	Incidence	126	Republic of Costa Rica	3	Both	27	Age-standardized	683	Periodontal diseases	3	Rate	1990	2021	0.348871	30.8677	-20.6558
57	6	Incidence	60	Republic of Lithuania	3	Both	27	Age-standardized	683	Periodontal diseases	3	Rate	1990	2021	1.44445	36.8945	-21.3139
58	6	Incidence	121	Plurinational State of Bolivia	3	Both	27	Age-standardized	683	Periodontal diseases	3	Rate	1990	2021	-2.36005	29.0836	-24.142
59	6	Incidence	6	People's Republic of China	3	Both	27	Age-standardized	683	Periodontal diseases	3	Rate	1990	2021	-3.15056	9.97945	-12.0176
60	6	Incidence	11	Republic of Indonesia	3	Both	27	Age-standardized	683	Periodontal diseases	3	Rate	1990	2021	1.10808	2.2557	0.00400718
61	6	Incidence	77	Republic of Cyprus	3	Both	27	Age-standardized	683	Periodontal diseases	3	Rate	1990	2021	-7.20461	34.8578	-33.6535
62	6	Incidence	111	Dominican Republic	3	Both	27	Age-standardized	683	Periodontal diseases	3	Rate	1990	2021	-1.0466	29.7227	-21.3032
63	6	Incidence	191	Zambia	3	Both	27	Age-standardized	683	Periodontal diseases	3	Rate	1990	2021	-31.3442	-6.53497	-49.1749
64	6	Incidence	70	Australasia	3	Both	27	Age-standardized	683	Periodontal diseases	3	Rate	1990	2021	8.7748	57.2905	-20.9339
65	6	Incidence	240	Europe & Central Asia - WB	3	Both	27	Age-standardized	683	Periodontal diseases	3	Rate	1990	2021	-1.45418	29.1111	-22.3455
66	6	Incidence	153	Syrian Arab Republic	3	Both	27	Age-standardized	683	Periodontal diseases	3	Rate	1990	2021	7.13343	49.4195	-20.6475
67	6	Incidence	50	Montenegro	3	Both	27	Age-standardized	683	Periodontal diseases	3	Rate	1990	2021	0.25989	41.3865	-25.0435
68	6	Incidence	163	India	3	Both	27	Age-standardized	683	Periodontal diseases	3	Rate	1990	2021	1.68119	20.7288	-11.6335
69	6	Incidence	143	Republic of Iraq	3	Both	27	Age-standardized	683	Periodontal diseases	3	Rate	1990	2021	8.31225	45.9396	-15.7275
70	6	Incidence	65	High-income Asia Pacific	3	Both	27	Age-standardized	683	Periodontal diseases	3	Rate	1990	2021	3.68747	45.0087	-22.0166
71	6	Incidence	203	Cabo Verde	3	Both	27	Age-standardized	683	Periodontal diseases	3	Rate	1990	2021	2.30635	6.63309	-1.16191
72	6	Incidence	38	Mongolia	3	Both	27	Age-standardized	683	Periodontal diseases	3	Rate	1990	2021	4.36544	44.0473	-21.6033
73	6	Incidence	43	Republic of Albania	3	Both	27	Age-standardized	683	Periodontal diseases	3	Rate	1990	2021	9.46313	55.9796	-19.6015
74	6	Incidence	175	Burundi	3	Both	27	Age-standardized	683	Periodontal diseases	3	Rate	1990	2021	-43.3088	-22.0597	-58.3841
75	6	Incidence	82	Hellenic Republic	3	Both	27	Age-standardized	683	Periodontal diseases	3	Rate	1990	2021	2.38312	24.3754	-15.6346
76	6	Incidence	185	Rwanda	3	Both	27	Age-standardized	683	Periodontal diseases	3	Rate	1990	2021	-33.631	-7.75966	-51.6409
77	6	Incidence	196	South Africa	3	Both	27	Age-standardized	683	Periodontal diseases	3	Rate	1990	2021	-25.4554	4.46048	-43.7369
78	6	Incidence	180	Kenya	3	Both	27	Age-standardized	683	Periodontal diseases	3	Rate	1990	2021	-4.4127	20.4458	-21.4304
79	6	Incidence	109	Republic of Cuba	3	Both	27	Age-standardized	683	Periodontal diseases	3	Rate	1990	2021	-8.00343	18.4373	-27.1136
80	6	Incidence	21	Oceania	3	Both	27	Age-standardized	683	Periodontal diseases	3	Rate	1990	2021	-71.7588	-59.9209	-80.24
81	6	Incidence	92	Kingdom of Spain	3	Both	27	Age-standardized	683	Periodontal diseases	3	Rate	1990	2021	-74.5245	-61.6237	-82.9153
82	6	Incidence	136	Republic of Paraguay	3	Both	27	Age-standardized	683	Periodontal diseases	3	Rate	1990	2021	-1.82834	30.6304	-24.8252
83	6	Incidence	87	Grand Duchy of Luxembourg	3	Both	27	Age-standardized	683	Periodontal diseases	3	Rate	1990	2021	-4.34305	35.3701	-29.061
84	6	Incidence	75	Republic of Austria	3	Both	27	Age-standardized	683	Periodontal diseases	3	Rate	1990	2021	-5.6639	35.0855	-31.8733
85	6	Incidence	248	Eastern Africa	3	Both	27	Age-standardized	683	Periodontal diseases	3	Rate	1990	2021	-19.8247	-5.58493	-29.7946
86	6	Incidence	119	Republic of Trinidad and Tobago	3	Both	27	Age-standardized	683	Periodontal diseases	3	Rate	1990	2021	0.566404	12.2824	-9.99446
87	6	Incidence	97	Argentine Republic	3	Both	27	Age-standardized	683	Periodontal diseases	3	Rate	1990	2021	0.779252	39.5609	-24.7678
88	6	Incidence	305	Bermuda	3	Both	27	Age-standardized	683	Periodontal diseases	3	Rate	1990	2021	1.27225	4.08977	-1.26188
89	6	Incidence	33	Republic of Armenia	3	Both	27	Age-standardized	683	Periodontal diseases	3	Rate	1990	2021	-1.08774	34.2811	-24.5032
90	6	Incidence	208	Guinea	3	Both	27	Age-standardized	683	Periodontal diseases	3	Rate	1990	2021	-1.01452	1.36725	-3.31031
91	6	Incidence	53	Republic of Serbia	3	Both	27	Age-standardized	683	Periodontal diseases	3	Rate	1990	2021	0.936645	41.3076	-24.8395
92	6	Incidence	114	Republic of Haiti	3	Both	27	Age-standardized	683	Periodontal diseases	3	Rate	1990	2021	-12.8574	18.4248	-35.5571
93	6	Incidence	31	Central Europe, Eastern Europe, and Central Asia	3	Both	27	Age-standardized	683	Periodontal diseases	3	Rate	1990	2021	-2.24609	29.6343	-24.5641
94	6	Incidence	173	Gabon	3	Both	27	Age-standardized	683	Periodontal diseases	3	Rate	1990	2021	-24.5187	-2.96865	-40.6639
95	6	Incidence	168	Angola	3	Both	27	Age-standardized	683	Periodontal diseases	3	Rate	1990	2021	-25.6877	-1.50142	-43.6478
96	6	Incidence	58	Republic of Estonia	3	Both	27	Age-standardized	683	Periodontal diseases	3	Rate	1990	2021	1.90276	37.253	-20.2417
97	6	Incidence	9	Southeast Asia	3	Both	27	Age-standardized	683	Periodontal diseases	3	Rate	1990	2021	-8.45837	4.51505	-17.3425
98	6	Incidence	218	Togo	3	Both	27	Age-standardized	683	Periodontal diseases	3	Rate	1990	2021	-13.3859	10.7133	-31.5237
99	6	Incidence	243	Middle East & North Africa - WB	3	Both	27	Age-standardized	683	Periodontal diseases	3	Rate	1990	2021	4.94477	31.552	-12.9499
100	6	Incidence	4	Southeast Asia, East Asia, and Oceania	3	Both	27	Age-standardized	683	Periodontal diseases	3	Rate	1990	2021	-4.92635	7.61163	-13.5561
101	6	Incidence	16	Republic of the Philippines	3	Both	27	Age-standardized	683	Periodontal diseases	3	Rate	1990	2021	-59.0749	-49.2175	-66.0017
102	6	Incidence	146	Lebanon	3	Both	27	Age-standardized	683	Periodontal diseases	3	Rate	1990	2021	9.18082	48.7442	-14.8994
103	6	Incidence	263	Western Africa	3	Both	27	Age-standardized	683	Periodontal diseases	3	Rate	1990	2021	-38.5007	-27.2196	-46.8485
104	6	Incidence	213	Niger	3	Both	27	Age-standardized	683	Periodontal diseases	3	Rate	1990	2021	-54.335	-36.1422	-67.6362
105	6	Incidence	134	Tropical Latin America	3	Both	27	Age-standardized	683	Periodontal diseases	3	Rate	1990	2021	7.82449	20.4042	-0.406086
106	6	Incidence	178	Eritrea	3	Both	27	Age-standardized	683	Periodontal diseases	3	Rate	1990	2021	-35.3627	-10.1621	-52.6716
107	6	Incidence	141	Arab Republic of Egypt	3	Both	27	Age-standardized	683	Periodontal diseases	3	Rate	1990	2021	15.8831	61.9857	-11.7863
108	6	Incidence	48	Hungary	3	Both	27	Age-standardized	683	Periodontal diseases	3	Rate	1990	2021	6.91665	70.1303	-28.1232
109	6	Incidence	139	People's Democratic Republic of Algeria	3	Both	27	Age-standardized	683	Periodontal diseases	3	Rate	1990	2021	3.96211	18.9936	-9.94266
110	6	Incidence	102	United States of America	3	Both	27	Age-standardized	683	Periodontal diseases	3	Rate	1990	2021	-6.73649	9.59618	-18.4912
111	6	Incidence	151	Qatar	3	Both	27	Age-standardized	683	Periodontal diseases	3	Rate	1990	2021	4.44578	35.031	-15.7883
112	6	Incidence	46	Republic of Croatia	3	Both	27	Age-standardized	683	Periodontal diseases	3	Rate	1990	2021	9.3148	33.1618	-9.76388
113	6	Incidence	201	Burkina Faso	3	Both	27	Age-standardized	683	Periodontal diseases	3	Rate	1990	2021	0.238863	3.18736	-2.00508
114	6	Incidence	129	Republic of Honduras	3	Both	27	Age-standardized	683	Periodontal diseases	3	Rate	1990	2021	-1.15157	38.3234	-24.328
115	6	Incidence	194	Lesotho	3	Both	27	Age-standardized	683	Periodontal diseases	3	Rate	1990	2021	20.8609	26.526	14.8018
116	6	Incidence	156	United Arab Emirates	3	Both	27	Age-standardized	683	Periodontal diseases	3	Rate	1990	2021	-2.35688	28.1998	-22.018
117	6	Incidence	68	Republic of Korea	3	Both	27	Age-standardized	683	Periodontal diseases	3	Rate	1990	2021	9.1391	54.4198	-19.3034
118	6	Incidence	206	Gambia	3	Both	27	Age-standardized	683	Periodontal diseases	3	Rate	1990	2021	-0.571609	1.91467	-2.97888
119	6	Incidence	124	Central Latin America	3	Both	27	Age-standardized	683	Periodontal diseases	3	Rate	1990	2021	-1.51359	19.2228	-16.0523
120	6	Incidence	26	Independent State of Papua New Guinea	3	Both	27	Age-standardized	683	Periodontal diseases	3	Rate	1990	2021	-72.5741	-60.2783	-81.1822
121	6	Incidence	216	Senegal	3	Both	27	Age-standardized	683	Periodontal diseases	3	Rate	1990	2021	-10.1781	10.0712	-26.8784
122	6	Incidence	80	French Republic	3	Both	27	Age-standardized	683	Periodontal diseases	3	Rate	1990	2021	8.27143	30.3476	-11.9259
123	6	Incidence	95	United Kingdom of Great Britain and Northern Ireland	3	Both	27	Age-standardized	683	Periodontal diseases	3	Rate	1990	2021	-5.47635	35.0939	-29.5489
124	6	Incidence	90	Kingdom of Norway	3	Both	27	Age-standardized	683	Periodontal diseases	3	Rate	1990	2021	-4.44063	17.5076	-21.774
125	6	Incidence	73	Western Europe	3	Both	27	Age-standardized	683	Periodontal diseases	3	Rate	1990	2021	-9.50153	15.0624	-27.5143
126	6	Incidence	482	Eastern Cape	3	Both	27	Age-standardized	683	Periodontal diseases	3	Rate	1990	2021	-30.738	5.72528	-52.6034
127	6	Incidence	183	Mauritius	3	Both	27	Age-standardized	683	Periodontal diseases	3	Rate	1990	2021	-22.6138	5.87577	-42.3474
128	6	Incidence	107	Barbados	3	Both	27	Age-standardized	683	Periodontal diseases	3	Rate	1990	2021	-8.20947	15.8608	-27.0362
129	6	Incidence	63	Ukraine	3	Both	27	Age-standardized	683	Periodontal diseases	3	Rate	1990	2021	-7.53672	23.8531	-28.5804
130	6	Incidence	487	Mpumalanga	3	Both	27	Age-standardized	683	Periodontal diseases	3	Rate	1990	2021	3.33519	8.91096	-0.543744
131	6	Incidence	171	Democratic Republic of the Congo	3	Both	27	Age-standardized	683	Periodontal diseases	3	Rate	1990	2021	-40.5827	-15.2456	-56.8629
132	6	Incidence	105	Antigua and Barbuda	3	Both	27	Age-standardized	683	Periodontal diseases	3	Rate	1990	2021	-6.11772	18.3656	-23.4094
133	6	Incidence	19	Democratic Republic of Timor-Leste	3	Both	27	Age-standardized	683	Periodontal diseases	3	Rate	1990	2021	-22.6484	11.632	-43.9114
134	6	Incidence	159	South Asia	3	Both	27	Age-standardized	683	Periodontal diseases	3	Rate	1990	2021	1.35795	20.9889	-12.9744
135	6	Incidence	117	Saint Vincent and the Grenadines	3	Both	27	Age-standardized	683	Periodontal diseases	3	Rate	1990	2021	-3.97997	24.4573	-23.9832
136	6	Incidence	85	State of Israel	3	Both	27	Age-standardized	683	Periodontal diseases	3	Rate	1990	2021	-7.11245	32.7526	-32.8815
137	6	Incidence	416	Tuvalu	3	Both	27	Age-standardized	683	Periodontal diseases	3	Rate	1990	2021	-71.2358	-57.9982	-80.5305
138	6	Incidence	199	Western Sub-Saharan Africa	3	Both	27	Age-standardized	683	Periodontal diseases	3	Rate	1990	2021	-34.7787	-23.803	-42.8673
139	6	Incidence	14	Republic of Maldives	3	Both	27	Age-standardized	683	Periodontal diseases	3	Rate	1990	2021	-21.406	10.2546	-41.7005
140	6	Incidence	12	Lao People's Democratic Republic	3	Both	27	Age-standardized	683	Periodontal diseases	3	Rate	1990	2021	36.1997	44.6092	26.1893
141	6	Incidence	211	Mali	3	Both	27	Age-standardized	683	Periodontal diseases	3	Rate	1990	2021	1.58077	5.89808	-1.86269
142	6	Incidence	36	Republic of Kazakhstan	3	Both	27	Age-standardized	683	Periodontal diseases	3	Rate	1990	2021	-0.41154	33.6355	-23.5131
143	6	Incidence	100	High-income North America	3	Both	27	Age-standardized	683	Periodontal diseases	3	Rate	1990	2021	-5.87561	11.7175	-18.4532
144	6	Incidence	351	Guam	3	Both	27	Age-standardized	683	Periodontal diseases	3	Rate	1990	2021	-64.8758	-51.8224	-75.0599
145	6	Incidence	149	Palestine	3	Both	27	Age-standardized	683	Periodontal diseases	3	Rate	1990	2021	13.3096	61.409	-15.5715
146	6	Incidence	166	Sub-Saharan Africa	3	Both	27	Age-standardized	683	Periodontal diseases	3	Rate	1990	2021	-29.2591	-13.5125	-40.4512
147	6	Incidence	41	Republic of Uzbekistan	3	Both	27	Age-standardized	683	Periodontal diseases	3	Rate	1990	2021	0.045447	38.5622	-25.1978
148	6	Incidence	61	Republic of Moldova	3	Both	27	Age-standardized	683	Periodontal diseases	3	Rate	1990	2021	-5.04335	30.3401	-30.2375
149	6	Incidence	56	Eastern Europe	3	Both	27	Age-standardized	683	Periodontal diseases	3	Rate	1990	2021	-4.79569	25.363	-25.4382
150	6	Incidence	161	Bangladesh	3	Both	27	Age-standardized	683	Periodontal diseases	3	Rate	1990	2021	-0.083971	29.0835	-20.5943
151	6	Incidence	78	Kingdom of Denmark	3	Both	27	Age-standardized	683	Periodontal diseases	3	Rate	1990	2021	-3.00249	13.7692	-16.269
152	6	Incidence	192	Southern Sub-Saharan Africa	3	Both	27	Age-standardized	683	Periodontal diseases	3	Rate	1990	2021	-20.9044	5.06756	-36.9545
153	6	Incidence	189	United Republic of Tanzania	3	Both	27	Age-standardized	683	Periodontal diseases	3	Rate	1990	2021	-32.828	-8.33487	-49.4947
154	6	Incidence	112	Grenada	3	Both	27	Age-standardized	683	Periodontal diseases	3	Rate	1990	2021	-2.56626	27.3863	-22.7781
155	6	Incidence	132	Republic of Panama	3	Both	27	Age-standardized	683	Periodontal diseases	3	Rate	1990	2021	3.8634	34.8636	-16.6699
156	6	Incidence	380	Palau	3	Both	27	Age-standardized	683	Periodontal diseases	3	Rate	1990	2021	-68.8524	-57.0198	-77.7094
157	6	Incidence	154	Tunisia	3	Both	27	Age-standardized	683	Periodontal diseases	3	Rate	1990	2021	12.8081	54.103	-13.1684
158	6	Incidence	71	Australia	3	Both	27	Age-standardized	683	Periodontal diseases	3	Rate	1990	2021	4.32983	51.6551	-24.9502
159	6	Incidence	367	Monaco	3	Both	27	Age-standardized	683	Periodontal diseases	3	Rate	1990	2021	-8.44197	23.4801	-30.1048
160	6	Incidence	164	Nepal	3	Both	27	Age-standardized	683	Periodontal diseases	3	Rate	1990	2021	2.25497	52.476	-27.0541
161	6	Incidence	24	Republic of the Marshall Islands	3	Both	27	Age-standardized	683	Periodontal diseases	3	Rate	1990	2021	-72.9102	-60.8555	-81.3485
162	6	Incidence	66	Brunei Darussalam	3	Both	27	Age-standardized	683	Periodontal diseases	3	Rate	1990	2021	-11.2853	20.6606	-32.5973
163	6	Incidence	127	Republic of El Salvador	3	Both	27	Age-standardized	683	Periodontal diseases	3	Rate	1990	2021	2.49089	16.7455	-9.95687
164	6	Incidence	478	World Bank Regions	3	Both	27	Age-standardized	683	Periodontal diseases	3	Rate	1990	2021	0.00703942	19.1983	-13.1651
165	6	Incidence	110	Commonwealth of Dominica	3	Both	27	Age-standardized	683	Periodontal diseases	3	Rate	1990	2021	-5.74089	22.6026	-25.4854
166	6	Incidence	39	Republic of Tajikistan	3	Both	27	Age-standardized	683	Periodontal diseases	3	Rate	1990	2021	-11.5493	21.3232	-34.7644
167	6	Incidence	122	Republic of Ecuador	3	Both	27	Age-standardized	683	Periodontal diseases	3	Rate	1990	2021	-2.10366	11.0873	-13.8635
168	6	Incidence	204	Chad	3	Both	27	Age-standardized	683	Periodontal diseases	3	Rate	1990	2021	-11.1786	13.67	-29.7827
169	6	Incidence	174	Eastern Sub-Saharan Africa	3	Both	27	Age-standardized	683	Periodontal diseases	3	Rate	1990	2021	-24.9138	-7.83921	-36.88
170	6	Incidence	241	Latin America & Caribbean - WB	3	Both	27	Age-standardized	683	Periodontal diseases	3	Rate	1990	2021	1.78251	21.8462	-11.6424
171	6	Incidence	485	KwaZulu-Natal	3	Both	27	Age-standardized	683	Periodontal diseases	3	Rate	1990	2021	-31.1418	2.72265	-52.8374
172	6	Incidence	93	Kingdom of Sweden	3	Both	27	Age-standardized	683	Periodontal diseases	3	Rate	1990	2021	-8.67802	24.4245	-31.1346
173	6	Incidence	144	Hashemite Kingdom of Jordan	3	Both	27	Age-standardized	683	Periodontal diseases	3	Rate	1990	2021	8.50269	49.6247	-17.01
174	6	Incidence	7	Democratic People's Republic of Korea	3	Both	27	Age-standardized	683	Periodontal diseases	3	Rate	1990	2021	-8.86537	-2.78959	-13.637
175	6	Incidence	197	Eswatini	3	Both	27	Age-standardized	683	Periodontal diseases	3	Rate	1990	2021	12.8579	18.6827	7.64775
176	6	Incidence	29	Kingdom of Tonga	3	Both	27	Age-standardized	683	Periodontal diseases	3	Rate	1990	2021	-71.0575	-58.7001	-79.9267
177	6	Incidence	83	Republic of Iceland	3	Both	27	Age-standardized	683	Periodontal diseases	3	Rate	1990	2021	-4.507	13.8616	-20.5236
178	6	Incidence	490	Western Cape	3	Both	27	Age-standardized	683	Periodontal diseases	3	Rate	1990	2021	-31.8422	0.241392	-52.0678
179	6	Incidence	51	Republic of Poland	3	Both	27	Age-standardized	683	Periodontal diseases	3	Rate	1990	2021	2.41432	34.001	-18.7299
180	6	Incidence	120	Andean Latin America	3	Both	27	Age-standardized	683	Periodontal diseases	3	Rate	1990	2021	-0.518102	15.1185	-13.8413
181	6	Incidence	209	Guinea-Bissau	3	Both	27	Age-standardized	683	Periodontal diseases	3	Rate	1990	2021	-13.0407	10.6877	-30.6579
182	6	Incidence	186	Seychelles	3	Both	27	Age-standardized	683	Periodontal diseases	3	Rate	1990	2021	-24.1441	3.28422	-43.3587
183	6	Incidence	76	Kingdom of Belgium	3	Both	27	Age-standardized	683	Periodontal diseases	3	Rate	1990	2021	-2.28821	23.1665	-19.8853
184	6	Incidence	374	Niue	3	Both	27	Age-standardized	683	Periodontal diseases	3	Rate	1990	2021	-68.7484	-56.449	-77.8589
185	6	Incidence	254	Northern Africa	3	Both	27	Age-standardized	683	Periodontal diseases	3	Rate	1990	2021	6.75367	37.8188	-14.4866
186	6	Incidence	98	Republic of Chile	3	Both	27	Age-standardized	683	Periodontal diseases	3	Rate	1990	2021	7.29166	43.3837	-15.3289
187	6	Incidence	176	Comoros	3	Both	27	Age-standardized	683	Periodontal diseases	3	Rate	1990	2021	-35.4153	-12.6538	-51.5498
188	6	Incidence	434	Scotland	3	Both	27	Age-standardized	683	Periodontal diseases	3	Rate	1990	2021	6.05015	66.7673	-29.7949
189	6	Incidence	137	North Africa and Middle East	3	Both	27	Age-standardized	683	Periodontal diseases	3	Rate	1990	2021	13.3957	43.3696	-6.04842
190	6	Incidence	396	San Marino	3	Both	27	Age-standardized	683	Periodontal diseases	3	Rate	1990	2021	-11.833	22.7309	-35.0583
191	6	Incidence	54	Slovak Republic	3	Both	27	Age-standardized	683	Periodontal diseases	3	Rate	1990	2021	3.7393	44.9617	-21.7242
192	6	Incidence	239	East Asia & Pacific - WB	3	Both	27	Age-standardized	683	Periodontal diseases	3	Rate	1990	2021	-2.96361	11.9816	-12.9703
193	6	Incidence	207	Ghana	3	Both	27	Age-standardized	683	Periodontal diseases	3	Rate	1990	2021	1.40667	5.05022	-1.35044
194	6	Incidence	202	Cameroon	3	Both	27	Age-standardized	683	Periodontal diseases	3	Rate	1990	2021	-1.1479	1.30296	-4.32741
195	6	Incidence	157	Yemen	3	Both	27	Age-standardized	683	Periodontal diseases	3	Rate	1990	2021	2.49666	19.7115	-12.661
196	6	Incidence	34	Republic of Azerbaijan	3	Both	27	Age-standardized	683	Periodontal diseases	3	Rate	1990	2021	-1.10949	33.0773	-23.9795
197	6	Incidence	103	Latin America and Caribbean	3	Both	27	Age-standardized	683	Periodontal diseases	3	Rate	1990	2021	1.51848	19.5728	-10.6894
198	6	Incidence	298	American Samoa	3	Both	27	Age-standardized	683	Periodontal diseases	3	Rate	1990	2021	-2.6917	0.470567	-6.42388
199	6	Incidence	22	Republic of Fiji	3	Both	27	Age-standardized	683	Periodontal diseases	3	Rate	1990	2021	-69.4381	-56.8919	-78.5426
200	6	Incidence	320	Cook Islands	3	Both	27	Age-standardized	683	Periodontal diseases	3	Rate	1990	2021	-64.7249	-50.9132	-75.0219
201	6	Incidence	17	Democratic Socialist Republic of Sri Lanka	3	Both	27	Age-standardized	683	Periodontal diseases	3	Rate	1990	2021	-44.148	-25.9288	-57.1586
202	6	Incidence	140	Kingdom of Bahrain	3	Both	27	Age-standardized	683	Periodontal diseases	3	Rate	1990	2021	6.08456	42.9145	-14.9685
203	6	Incidence	44	Bosnia and Herzegovina	3	Both	27	Age-standardized	683	Periodontal diseases	3	Rate	1990	2021	23.7442	84.1275	-10.4033
204	6	Incidence	88	Republic of Malta	3	Both	27	Age-standardized	683	Periodontal diseases	3	Rate	1990	2021	-1.41874	43.0619	-28.9325
205	6	Incidence	244	South Asia - WB	3	Both	27	Age-standardized	683	Periodontal diseases	3	Rate	1990	2021	0.572744	20.3161	-13.8561
206	6	Incidence	108	Belize	3	Both	27	Age-standardized	683	Periodontal diseases	3	Rate	1990	2021	-5.04726	25.9264	-25.1459
207	6	Incidence	181	Madagascar	3	Both	27	Age-standardized	683	Periodontal diseases	3	Rate	1990	2021	-72.6268	-61.7536	-80.4224
208	6	Incidence	115	Jamaica	3	Both	27	Age-standardized	683	Periodontal diseases	3	Rate	1990	2021	-6.44761	23.7551	-26.2635
209	6	Incidence	169	Central African Republic	3	Both	27	Age-standardized	683	Periodontal diseases	3	Rate	1990	2021	-40.2066	-15.3695	-56.7158
210	6	Incidence	179	Ethiopia	3	Both	27	Age-standardized	683	Periodontal diseases	3	Rate	1990	2021	1.18634	3.50632	-0.939068
211	6	Incidence	86	Republic of Italy	3	Both	27	Age-standardized	683	Periodontal diseases	3	Rate	1990	2021	-4.47666	31.8628	-29.4262
212	6	Incidence	147	Libya	3	Both	27	Age-standardized	683	Periodontal diseases	3	Rate	1990	2021	-8.56238	7.65674	-23.3678
213	6	Incidence	195	Namibia	3	Both	27	Age-standardized	683	Periodontal diseases	3	Rate	1990	2021	13.0933	19.9133	7.24653
214	6	Incidence	49	North Macedonia	3	Both	27	Age-standardized	683	Periodontal diseases	3	Rate	1990	2021	2.858	45.1085	-24.1404
215	6	Incidence	125	Republic of Colombia	3	Both	27	Age-standardized	683	Periodontal diseases	3	Rate	1990	2021	0.1816	31.1158	-19.9058
216	6	Incidence	524	Alaska	3	Both	27	Age-standardized	683	Periodontal diseases	3	Rate	1990	2021	-5.65062	-0.565337	-11.8822
217	6	Incidence	135	Federative Republic of Brazil	3	Both	27	Age-standardized	683	Periodontal diseases	3	Rate	1990	2021	8.10971	19.9118	0.365245
218	6	Incidence	130	United Mexican States	3	Both	27	Age-standardized	683	Periodontal diseases	3	Rate	1990	2021	-1.68791	16.0998	-13.8978
219	6	Incidence	184	Mozambique	3	Both	27	Age-standardized	683	Periodontal diseases	3	Rate	1990	2021	-34.4729	-7.95619	-52.0844
220	6	Incidence	214	Nigeria	3	Both	27	Age-standardized	683	Periodontal diseases	3	Rate	1990	2021	-66.3312	-53.2525	-75.8387
221	6	Incidence	142	Islamic Republic of Iran	3	Both	27	Age-standardized	683	Periodontal diseases	3	Rate	1990	2021	-0.151733	7.88901	-5.32745
222	6	Incidence	162	Bhutan	3	Both	27	Age-standardized	683	Periodontal diseases	3	Rate	1990	2021	1.12196	29.0741	-17.2236
223	6	Incidence	546	Minnesota	3	Both	27	Age-standardized	683	Periodontal diseases	3	Rate	1990	2021	-10.2115	21.646	-32.9118
224	6	Incidence	172	Equatorial Guinea	3	Both	27	Age-standardized	683	Periodontal diseases	3	Rate	1990	2021	-12.6214	15.2664	-31.6491
225	6	Incidence	483	Free State	3	Both	27	Age-standardized	683	Periodontal diseases	3	Rate	1990	2021	-29.5793	6.21609	-51.6228
226	6	Incidence	152	Saudi Arabia	3	Both	27	Age-standardized	683	Periodontal diseases	3	Rate	1990	2021	13.3935	56.0829	-14.3391
227	6	Incidence	217	Sierra Leone	3	Both	27	Age-standardized	683	Periodontal diseases	3	Rate	1990	2021	35.4656	77.7816	10.2225
228	6	Incidence	551	Nevada	3	Both	27	Age-standardized	683	Periodontal diseases	3	Rate	1990	2021	-12.9867	18.6928	-34.7183
229	6	Incidence	212	Mauritania	3	Both	27	Age-standardized	683	Periodontal diseases	3	Rate	1990	2021	-9.72779	11.0282	-27.0129
230	6	Incidence	488	North-West	3	Both	27	Age-standardized	683	Periodontal diseases	3	Rate	1990	2021	7.28053	14.0348	2.8004
231	6	Incidence	385	Puerto Rico	3	Both	27	Age-standardized	683	Periodontal diseases	3	Rate	1990	2021	-4.88824	16.6235	-21.6026
232	6	Incidence	529	Connecticut	3	Both	27	Age-standardized	683	Periodontal diseases	3	Rate	1990	2021	-3.40894	1.55626	-9.89026
233	6	Incidence	167	Central Sub-Saharan Africa	3	Both	27	Age-standardized	683	Periodontal diseases	3	Rate	1990	2021	-35.8651	-10.6287	-52.543
234	6	Incidence	81	Federal Republic of Germany	3	Both	27	Age-standardized	683	Periodontal diseases	3	Rate	1990	2021	1.34453	22.0988	-14.9484
235	6	Incidence	422	United States Virgin Islands	3	Both	27	Age-standardized	683	Periodontal diseases	3	Rate	1990	2021	-3.45044	20.646	-20.8225
236	6	Incidence	118	Republic of Suriname	3	Both	27	Age-standardized	683	Periodontal diseases	3	Rate	1990	2021	-5.86313	19.9342	-24.5332
237	6	Incidence	556	North Carolina	3	Both	27	Age-standardized	683	Periodontal diseases	3	Rate	1990	2021	-0.839263	3.55973	-5.89532
238	6	Incidence	4622	West Midlands	3	Both	27	Age-standardized	683	Periodontal diseases	3	Rate	1990	2021	-11.2868	37.3268	-39.2252
239	6	Incidence	205	C么te d'Ivoire	3	Both	27	Age-standardized	683	Periodontal diseases	3	Rate	1990	2021	-10.1356	9.88988	-26.9867
240	6	Incidence	150	Oman	3	Both	27	Age-standardized	683	Periodontal diseases	3	Rate	1990	2021	7.65304	44.8395	-15.5054
241	6	Incidence	479	WHO region	3	Both	27	Age-standardized	683	Periodontal diseases	3	Rate	1990	2021	-0.0246443	19.2156	-13.2412
242	6	Incidence	561	Pennsylvania	3	Both	27	Age-standardized	683	Periodontal diseases	3	Rate	1990	2021	-4.04444	0.508433	-10.9244
243	6	Incidence	539	Kansas	3	Both	27	Age-standardized	683	Periodontal diseases	3	Rate	1990	2021	-4.09106	0.647247	-9.44465
244	6	Incidence	242	Sub-Saharan Africa - WB	3	Both	27	Age-standardized	683	Periodontal diseases	3	Rate	1990	2021	-28.2653	-12.8392	-39.1467
245	6	Incidence	4636	Wales	3	Both	27	Age-standardized	683	Periodontal diseases	3	Rate	1990	2021	6.57584	69.8166	-29.8938
246	6	Incidence	261	Southern Africa	3	Both	27	Age-standardized	683	Periodontal diseases	3	Rate	1990	2021	-24.7209	0.899383	-41.4068
247	6	Incidence	113	Republic of Guyana	3	Both	27	Age-standardized	683	Periodontal diseases	3	Rate	1990	2021	-2.365	31.2962	-24.0379
248	6	Incidence	522	Sudan	3	Both	27	Age-standardized	683	Periodontal diseases	3	Rate	1990	2021	8.32396	14.847	3.81424
249	6	Incidence	435	South Sudan	3	Both	27	Age-standardized	683	Periodontal diseases	3	Rate	1990	2021	-39.9344	-18.4639	-55.054
250	6	Incidence	534	Hawaii	3	Both	27	Age-standardized	683	Periodontal diseases	3	Rate	1990	2021	-11.2894	19.5158	-33.6008
251	6	Incidence	4647	Coahuila	3	Both	27	Age-standardized	683	Periodontal diseases	3	Rate	1990	2021	-0.23788	13.7806	-10.4563
252	6	Incidence	369	Nauru	3	Both	27	Age-standardized	683	Periodontal diseases	3	Rate	1990	2021	-71.3412	-59.9355	-79.4309
253	6	Incidence	486	Limpopo	3	Both	27	Age-standardized	683	Periodontal diseases	3	Rate	1990	2021	-27.3454	11.3339	-50.8192
254	6	Incidence	190	Uganda	3	Both	27	Age-standardized	683	Periodontal diseases	3	Rate	1990	2021	-33.2152	-6.93377	-51.03
255	6	Incidence	566	Texas	3	Both	27	Age-standardized	683	Periodontal diseases	3	Rate	1990	2021	-4.43782	0.659256	-11.0618
256	6	Incidence	4674	Zacatecas	3	Both	27	Age-standardized	683	Periodontal diseases	3	Rate	1990	2021	0.208285	3.51162	-2.58209
257	6	Incidence	554	New Mexico	3	Both	27	Age-standardized	683	Periodontal diseases	3	Rate	1990	2021	-11.6109	20.6924	-33.4135
258	6	Incidence	200	Benin	3	Both	27	Age-standardized	683	Periodontal diseases	3	Rate	1990	2021	-11.0106	10.7436	-28.3213
259	6	Incidence	413	Tokelau	3	Both	27	Age-standardized	683	Periodontal diseases	3	Rate	1990	2021	-69.7137	-57.0635	-79.0868
260	6	Incidence	544	Massachusetts	3	Both	27	Age-standardized	683	Periodontal diseases	3	Rate	1990	2021	-9.32082	21.2449	-31.9765
261	6	Incidence	4735	South Sulawesi	3	Both	27	Age-standardized	683	Periodontal diseases	3	Rate	1990	2021	0.991318	4.26753	-1.80828
262	6	Incidence	571	West Virginia	3	Both	27	Age-standardized	683	Periodontal diseases	3	Rate	1990	2021	-11.7238	19.6425	-33.8857
263	6	Incidence	549	Montana	3	Both	27	Age-standardized	683	Periodontal diseases	3	Rate	1990	2021	-3.80875	0.91647	-9.40244
264	6	Incidence	177	Djibouti	3	Both	27	Age-standardized	683	Periodontal diseases	3	Rate	1990	2021	-32.5936	-10.5599	-49.3888
265	6	Incidence	4669	Tabasco	3	Both	27	Age-standardized	683	Periodontal diseases	3	Rate	1990	2021	0.333431	3.60833	-2.56964
266	6	Incidence	210	Liberia	3	Both	27	Age-standardized	683	Periodontal diseases	3	Rate	1990	2021	-2.87238	0.994348	-6.78515
267	6	Incidence	4652	Durango	3	Both	27	Age-standardized	683	Periodontal diseases	3	Rate	1990	2021	-2.24709	28.1999	-21.5743
268	6	Incidence	4620	Yorkshire and the Humber	3	Both	27	Age-standardized	683	Periodontal diseases	3	Rate	1990	2021	-9.97098	39.4287	-38.6126
269	6	Incidence	4713	Jambi	3	Both	27	Age-standardized	683	Periodontal diseases	3	Rate	1990	2021	3.23781	7.15175	-0.494115
270	6	Incidence	4740	North Maluku	3	Both	27	Age-standardized	683	Periodontal diseases	3	Rate	1990	2021	-1.93302	1.85576	-5.7667
271	6	Incidence	4625	South East England	3	Both	27	Age-standardized	683	Periodontal diseases	3	Rate	1990	2021	0.346462	7.64176	-4.44411
272	6	Incidence	376	Northern Mariana Islands	3	Both	27	Age-standardized	683	Periodontal diseases	3	Rate	1990	2021	-68.5865	-56.8778	-77.6674
273	6	Incidence	4645	Baja California Sur	3	Both	27	Age-standardized	683	Periodontal diseases	3	Rate	1990	2021	0.535952	3.36747	-2.26039
274	6	Incidence	4771	Roraima	3	Both	27	Age-standardized	683	Periodontal diseases	3	Rate	1990	2021	3.39316	36.0715	-19.0143
275	6	Incidence	527	California	3	Both	27	Age-standardized	683	Periodontal diseases	3	Rate	1990	2021	-4.1813	0.281887	-9.34067
276	6	Incidence	4718	Riau Islands	3	Both	27	Age-standardized	683	Periodontal diseases	3	Rate	1990	2021	-0.791265	1.66743	-3.43946
277	6	Incidence	4662	Oaxaca	3	Both	27	Age-standardized	683	Periodontal diseases	3	Rate	1990	2021	0.0537069	2.79377	-2.52247
278	6	Incidence	532	Florida	3	Both	27	Age-standardized	683	Periodontal diseases	3	Rate	1990	2021	-4.9429	0.113918	-11.3318
279	6	Incidence	145	State of Kuwait	3	Both	27	Age-standardized	683	Periodontal diseases	3	Rate	1990	2021	3.77235	37.5486	-16.1844
280	6	Incidence	4657	M茅xico	3	Both	27	Age-standardized	683	Periodontal diseases	3	Rate	1990	2021	-4.15831	23.1141	-22.7874
281	6	Incidence	4723	Yogyakarta	3	Both	27	Age-standardized	683	Periodontal diseases	3	Rate	1990	2021	1.39446	4.81467	-1.68426
282	6	Incidence	525	Arizona	3	Both	27	Age-standardized	683	Periodontal diseases	3	Rate	1990	2021	-5.2096	0.0107396	-11.1728
283	6	Incidence	4667	Sinaloa	3	Both	27	Age-standardized	683	Periodontal diseases	3	Rate	1990	2021	1.26528	4.34031	-1.50462
284	6	Incidence	542	Maine	3	Both	27	Age-standardized	683	Periodontal diseases	3	Rate	1990	2021	-10.9472	19.7519	-33.0133
285	6	Incidence	4749	England	3	Both	27	Age-standardized	683	Periodontal diseases	3	Rate	1990	2021	-7.08082	30.7123	-29.4502
286	6	Incidence	559	Oklahoma	3	Both	27	Age-standardized	683	Periodontal diseases	3	Rate	1990	2021	-3.78175	0.964025	-9.00988
287	6	Incidence	537	Indiana	3	Both	27	Age-standardized	683	Periodontal diseases	3	Rate	1990	2021	-11.0684	20.2809	-32.8418
288	6	Incidence	4733	North Sulawesi	3	Both	27	Age-standardized	683	Periodontal diseases	3	Rate	1990	2021	1.01206	4.18152	-1.89828
289	6	Incidence	4776	Tocantins	3	Both	27	Age-standardized	683	Periodontal diseases	3	Rate	1990	2021	9.69001	48.1259	-14.8456
290	6	Incidence	4672	Veracruz de Ignacio de la Llave	3	Both	27	Age-standardized	683	Periodontal diseases	3	Rate	1990	2021	-0.364449	2.54005	-3.47696
291	6	Incidence	4728	East Nusa Tenggara	3	Both	27	Age-standardized	683	Periodontal diseases	3	Rate	1990	2021	-0.00528013	3.3184	-3.62958
292	6	Incidence	4754	Bahia	3	Both	27	Age-standardized	683	Periodontal diseases	3	Rate	1990	2021	9.41959	15.2155	3.94712
293	6	Incidence	349	Greenland	3	Both	27	Age-standardized	683	Periodontal diseases	3	Rate	1990	2021	0.0663673	34.8422	-22.6507
294	6	Incidence	569	Virginia	3	Both	27	Age-standardized	683	Periodontal diseases	3	Rate	1990	2021	-10.3125	22.0609	-32.7648
295	6	Incidence	4618	North East England	3	Both	27	Age-standardized	683	Periodontal diseases	3	Rate	1990	2021	-8.23086	42.2364	-37.3374
296	6	Incidence	4650	Chihuahua	3	Both	27	Age-standardized	683	Periodontal diseases	3	Rate	1990	2021	-3.40365	23.7318	-22.6043
297	6	Incidence	4711	West Sumatra	3	Both	27	Age-standardized	683	Periodontal diseases	3	Rate	1990	2021	2.20045	5.51689	-1.20232
298	6	Incidence	564	South Dakota	3	Both	27	Age-standardized	683	Periodontal diseases	3	Rate	1990	2021	-9.11304	25.3938	-30.9744
299	6	Incidence	4655	Hidalgo	3	Both	27	Age-standardized	683	Periodontal diseases	3	Rate	1990	2021	-1.26857	28.8187	-21.6373
300	6	Incidence	4759	Maranh茫o	3	Both	27	Age-standardized	683	Periodontal diseases	3	Rate	1990	2021	15.8881	24.605	8.26671
301	6	Incidence	182	Malawi	3	Both	27	Age-standardized	683	Periodontal diseases	3	Rate	1990	2021	-38.9413	-15.0819	-55.1668
302	6	Incidence	4743	European Union	3	Both	27	Age-standardized	683	Periodontal diseases	3	Rate	1990	2021	-6.2402	20.9	-25.4183
303	6	Incidence	4764	Para铆ba	3	Both	27	Age-standardized	683	Periodontal diseases	3	Rate	1990	2021	13.111	20.4366	6.30557
304	6	Incidence	4738	West Sulawesi	3	Both	27	Age-standardized	683	Periodontal diseases	3	Rate	1990	2021	-0.824959	2.84534	-3.73903
305	6	Incidence	484	Gauteng	3	Both	27	Age-standardized	683	Periodontal diseases	3	Rate	1990	2021	-32.7038	-1.68007	-52.5859
306	6	Incidence	4846	Chhattisgarh	3	Both	27	Age-standardized	683	Periodontal diseases	3	Rate	1990	2021	5.80819	14.6306	-1.63061
307	6	Incidence	215	Sao Tome and Principe	3	Both	27	Age-standardized	683	Periodontal diseases	3	Rate	1990	2021	-9.60806	12.2267	-27.0714
308	6	Incidence	4769	Rio Grande do Norte	3	Both	27	Age-standardized	683	Periodontal diseases	3	Rate	1990	2021	11.829	18.2486	5.5367
309	6	Incidence	4721	West Java	3	Both	27	Age-standardized	683	Periodontal diseases	3	Rate	1990	2021	-0.153726	3.34319	-3.88687
310	6	Incidence	393	Saint Kitts and Nevis	3	Both	27	Age-standardized	683	Periodontal diseases	3	Rate	1990	2021	-3.32828	21.5027	-21.0995
311	6	Incidence	547	Mississippi	3	Both	27	Age-standardized	683	Periodontal diseases	3	Rate	1990	2021	-10.915	21.3104	-33.6801
312	6	Incidence	4843	Assam	3	Both	27	Age-standardized	683	Periodontal diseases	3	Rate	1990	2021	1.20455	18.8807	-11.3831
313	6	Incidence	4623	East of England	3	Both	27	Age-standardized	683	Periodontal diseases	3	Rate	1990	2021	-9.9857	38.6676	-38.1936
314	6	Incidence	4660	Nayarit	3	Both	27	Age-standardized	683	Periodontal diseases	3	Rate	1990	2021	-2.13926	26.2464	-20.9444
315	6	Incidence	4665	Quintana Roo	3	Both	27	Age-standardized	683	Periodontal diseases	3	Rate	1990	2021	1.87924	4.95564	-1.32334
316	6	Incidence	4875	West Bengal	3	Both	27	Age-standardized	683	Periodontal diseases	3	Rate	1990	2021	-0.78875	27.6105	-20.9837
317	6	Incidence	562	Rhode Island	3	Both	27	Age-standardized	683	Periodontal diseases	3	Rate	1990	2021	-10.1931	20.53	-32.6162
318	6	Incidence	489	Northern Cape	3	Both	27	Age-standardized	683	Periodontal diseases	3	Rate	1990	2021	-31.4485	2.24306	-52.4428
319	6	Incidence	4774	Sergipe	3	Both	27	Age-standardized	683	Periodontal diseases	3	Rate	1990	2021	3.61858	37.5692	-19.7024
320	6	Incidence	4716	Lampung	3	Both	27	Age-standardized	683	Periodontal diseases	3	Rate	1990	2021	3.04115	6.64207	0.0581857
321	6	Incidence	552	New Hampshire	3	Both	27	Age-standardized	683	Periodontal diseases	3	Rate	1990	2021	-3.41389	1.85548	-9.83141
322	6	Incidence	433	Northern Ireland	3	Both	27	Age-standardized	683	Periodontal diseases	3	Rate	1990	2021	-0.772801	58.2052	-33.0313
323	6	Incidence	4643	Aguascalientes	3	Both	27	Age-standardized	683	Periodontal diseases	3	Rate	1990	2021	-2.17711	23.7181	-22.0258
324	6	Incidence	4864	Nagaland	3	Both	27	Age-standardized	683	Periodontal diseases	3	Rate	1990	2021	4.73072	20.1134	-5.63292
325	6	Incidence	557	North Dakota	3	Both	27	Age-standardized	683	Periodontal diseases	3	Rate	1990	2021	-7.48832	25.7837	-31.6101
326	6	Incidence	4752	Amazonas	3	Both	27	Age-standardized	683	Periodontal diseases	3	Rate	1990	2021	5.69849	10.9427	1.41915
327	6	Incidence	535	Idaho	3	Both	27	Age-standardized	683	Periodontal diseases	3	Rate	1990	2021	-10.8811	22.0444	-33.4299
328	6	Incidence	4731	South Kalimantan	3	Both	27	Age-standardized	683	Periodontal diseases	3	Rate	1990	2021	0.293544	3.59532	-2.99914
329	6	Incidence	4872	Tripura	3	Both	27	Age-standardized	683	Periodontal diseases	3	Rate	1990	2021	1.0856	30.9799	-19.9624
330	6	Incidence	523	Alabama	3	Both	27	Age-standardized	683	Periodontal diseases	3	Rate	1990	2021	-3.99497	1.9107	-10.3933
331	6	Incidence	4870	Tamil Nadu	3	Both	27	Age-standardized	683	Periodontal diseases	3	Rate	1990	2021	6.19803	23.0001	-5.70308
332	6	Incidence	540	Kentucky	3	Both	27	Age-standardized	683	Periodontal diseases	3	Rate	1990	2021	-11.2169	19.183	-33.8025
333	6	Incidence	530	Delaware	3	Both	27	Age-standardized	683	Periodontal diseases	3	Rate	1990	2021	-11.1587	20.9581	-33.8815
334	6	Incidence	4648	Colima	3	Both	27	Age-standardized	683	Periodontal diseases	3	Rate	1990	2021	-2.74843	24.5461	-21.5618
335	6	Incidence	4726	Bali	3	Both	27	Age-standardized	683	Periodontal diseases	3	Rate	1990	2021	-0.871631	1.9577	-4.14505
336	6	Incidence	4736	Southeast Sulawesi	3	Both	27	Age-standardized	683	Periodontal diseases	3	Rate	1990	2021	2.27989	6.0862	-1.22661
337	6	Incidence	567	Utah	3	Both	27	Age-standardized	683	Periodontal diseases	3	Rate	1990	2021	-10.6256	22.1808	-32.3291
338	6	Incidence	4920	Rogaland	3	Both	27	Age-standardized	683	Periodontal diseases	3	Rate	1990	2021	-4.22559	18.1014	-21.206
339	6	Incidence	4757	Esp铆rito Santo	3	Both	27	Age-standardized	683	Periodontal diseases	3	Rate	1990	2021	10.5255	17.6852	5.3702
340	6	Incidence	4709	Aceh	3	Both	27	Age-standardized	683	Periodontal diseases	3	Rate	1990	2021	-3.81626	-0.3549	-7.15365
341	6	Incidence	4940	Sweden except Stockholm	3	Both	27	Age-standardized	683	Periodontal diseases	3	Rate	1990	2021	-8.78292	24.6218	-31.54
342	6	Incidence	4762	Mato Grosso	3	Both	27	Age-standardized	683	Periodontal diseases	3	Rate	1990	2021	12.9768	21.1753	6.88533
343	6	Incidence	35441	Fukui	3	Both	27	Age-standardized	683	Periodontal diseases	3	Rate	1990	2021	2.49618	42.5567	-23.0556
344	6	Incidence	4851	Gujarat	3	Both	27	Age-standardized	683	Periodontal diseases	3	Rate	1990	2021	1.31854	28.328	-18.6336
345	6	Incidence	533	Georgia	3	Both	27	Age-standardized	683	Periodontal diseases	3	Rate	1990	2021	-11.4541	21.2406	-33.393
346	6	Incidence	4767	Piaui	3	Both	27	Age-standardized	683	Periodontal diseases	3	Rate	1990	2021	15.3208	24.5947	7.32499
347	6	Incidence	35446	Aichi	3	Both	27	Age-standardized	683	Periodontal diseases	3	Rate	1990	2021	2.67078	45.0895	-21.8041
348	6	Incidence	545	Michigan	3	Both	27	Age-standardized	683	Periodontal diseases	3	Rate	1990	2021	-11.3739	19.9885	-33.3007
349	6	Incidence	4670	Tamaulipas	3	Both	27	Age-standardized	683	Periodontal diseases	3	Rate	1990	2021	0.323042	3.18058	-2.69464
350	6	Incidence	4663	Puebla	3	Both	27	Age-standardized	683	Periodontal diseases	3	Rate	1990	2021	1.60912	5.05759	-2.0435
351	6	Incidence	4653	Guanajuato	3	Both	27	Age-standardized	683	Periodontal diseases	3	Rate	1990	2021	-0.76992	28.8099	-20.9608
352	6	Incidence	35424	Hokkaid艒	3	Both	27	Age-standardized	683	Periodontal diseases	3	Rate	1990	2021	2.93013	43.1016	-22.1838
353	6	Incidence	4621	East Midlands	3	Both	27	Age-standardized	683	Periodontal diseases	3	Rate	1990	2021	-10.0283	37.9918	-38.6532
354	6	Incidence	555	New York	3	Both	27	Age-standardized	683	Periodontal diseases	3	Rate	1990	2021	4.02476	35.9446	-16.9457
355	6	Incidence	572	Wisconsin	3	Both	27	Age-standardized	683	Periodontal diseases	3	Rate	1990	2021	-15.0359	44.4204	-47.4085
356	6	Incidence	550	Nebraska	3	Both	27	Age-standardized	683	Periodontal diseases	3	Rate	1990	2021	-10.2761	23.3232	-32.3129
357	6	Incidence	4772	Rio Grande do Sul	3	Both	27	Age-standardized	683	Periodontal diseases	3	Rate	1990	2021	2.42838	24.5009	-15.3454
358	6	Incidence	4668	Sonora	3	Both	27	Age-standardized	683	Periodontal diseases	3	Rate	1990	2021	1.15588	4.02952	-1.63977
359	6	Incidence	4719	North Kalimantan	3	Both	27	Age-standardized	683	Periodontal diseases	3	Rate	1990	2021	1.00381	3.42752	-1.57315
360	6	Incidence	4658	Michoac谩n de Ocampo	3	Both	27	Age-standardized	683	Periodontal diseases	3	Rate	1990	2021	-3.26789	24.6393	-23.1308
361	6	Incidence	4626	South West England	3	Both	27	Age-standardized	683	Periodontal diseases	3	Rate	1990	2021	-2.75041	18.2091	-14.2604
362	6	Incidence	4856	Karnataka	3	Both	27	Age-standardized	683	Periodontal diseases	3	Rate	1990	2021	7.1198	22.3454	-3.0678
363	6	Incidence	4862	Meghalaya	3	Both	27	Age-standardized	683	Periodontal diseases	3	Rate	1990	2021	4.84872	13.4753	-1.49808
364	6	Incidence	528	Colorado	3	Both	27	Age-standardized	683	Periodontal diseases	3	Rate	1990	2021	-4.04603	1.20888	-9.49212
365	6	Incidence	570	Washington	3	Both	27	Age-standardized	683	Periodontal diseases	3	Rate	1990	2021	-9.81546	21.7634	-32.6565
366	6	Incidence	543	Maryland	3	Both	27	Age-standardized	683	Periodontal diseases	3	Rate	1990	2021	-10.5266	21.4995	-32.8876
367	6	Incidence	4741	West Papua	3	Both	27	Age-standardized	683	Periodontal diseases	3	Rate	1990	2021	2.41552	6.42837	-0.665435
368	6	Incidence	538	Iowa	3	Both	27	Age-standardized	683	Periodontal diseases	3	Rate	1990	2021	-12.3954	45.1226	-47.9324
369	6	Incidence	4750	Acre	3	Both	27	Age-standardized	683	Periodontal diseases	3	Rate	1990	2021	11.0823	17.6367	4.76453
370	6	Incidence	526	Arkansas	3	Both	27	Age-standardized	683	Periodontal diseases	3	Rate	1990	2021	-3.87528	0.866462	-9.51638
371	6	Incidence	4646	Campeche	3	Both	27	Age-standardized	683	Periodontal diseases	3	Rate	1990	2021	-1.6533	27.6825	-21.5694
372	6	Incidence	4859	Madhya Pradesh	3	Both	27	Age-standardized	683	Periodontal diseases	3	Rate	1990	2021	1.6933	10.5225	-4.6622
373	6	Incidence	4673	Yucat谩n	3	Both	27	Age-standardized	683	Periodontal diseases	3	Rate	1990	2021	2.66056	6.39785	-0.478972
374	6	Incidence	4714	South Sumatra	3	Both	27	Age-standardized	683	Periodontal diseases	3	Rate	1990	2021	-0.292865	3.54547	-3.28342
375	6	Incidence	4841	Andhra Pradesh	3	Both	27	Age-standardized	683	Periodontal diseases	3	Rate	1990	2021	2.30505	32.5318	-18.4898
376	6	Incidence	4868	Rajasthan	3	Both	27	Age-standardized	683	Periodontal diseases	3	Rate	1990	2021	2.62892	27.4778	-12.6128
377	6	Incidence	560	Oregon	3	Both	27	Age-standardized	683	Periodontal diseases	3	Rate	1990	2021	-10.3298	21.214	-32.762
378	6	Incidence	4724	East Java	3	Both	27	Age-standardized	683	Periodontal diseases	3	Rate	1990	2021	2.77765	6.43288	-0.371227
379	6	Incidence	4853	Himachal Pradesh	3	Both	27	Age-standardized	683	Periodontal diseases	3	Rate	1990	2021	8.66934	16.2427	2.79347
380	6	Incidence	4734	Central Sulawesi	3	Both	27	Age-standardized	683	Periodontal diseases	3	Rate	1990	2021	3.40356	7.31183	0.0699657
381	6	Incidence	35434	Saitama	3	Both	27	Age-standardized	683	Periodontal diseases	3	Rate	1990	2021	2.64239	47.9949	-23.5994
382	6	Incidence	4755	Cear谩	3	Both	27	Age-standardized	683	Periodontal diseases	3	Rate	1990	2021	13.0293	20.3378	5.88673
383	6	Incidence	4849	Delhi	3	Both	27	Age-standardized	683	Periodontal diseases	3	Rate	1990	2021	-0.0767072	24.3746	-18.2804
384	6	Incidence	35451	Hy艒go	3	Both	27	Age-standardized	683	Periodontal diseases	3	Rate	1990	2021	1.80497	42.9583	-23.8037
385	6	Incidence	4729	West Kalimantan	3	Both	27	Age-standardized	683	Periodontal diseases	3	Rate	1990	2021	-0.704077	2.18512	-4.05293
386	6	Incidence	4739	Maluku	3	Both	27	Age-standardized	683	Periodontal diseases	3	Rate	1990	2021	-11.2156	-5.9177	-17.9322
387	6	Incidence	4651	Mexico City	3	Both	27	Age-standardized	683	Periodontal diseases	3	Rate	1990	2021	-2.35441	21.936	-20.235
388	6	Incidence	4765	Paran谩	3	Both	27	Age-standardized	683	Periodontal diseases	3	Rate	1990	2021	7.98922	13.6354	3.26713
389	6	Incidence	4656	Jalisco	3	Both	27	Age-standardized	683	Periodontal diseases	3	Rate	1990	2021	-2.45267	25.4009	-21.9449
390	6	Incidence	4712	Riau	3	Both	27	Age-standardized	683	Periodontal diseases	3	Rate	1990	2021	-1.1953	1.27023	-4.361
391	6	Incidence	35449	Ky艒to	3	Both	27	Age-standardized	683	Periodontal diseases	3	Rate	1990	2021	2.73002	43.892	-23.2794
392	6	Incidence	35444	Gifu	3	Both	27	Age-standardized	683	Periodontal diseases	3	Rate	1990	2021	3.44755	43.8381	-22.9176
393	6	Incidence	35429	Yamagata	3	Both	27	Age-standardized	683	Periodontal diseases	3	Rate	1990	2021	3.54078	45.0735	-22.755
394	6	Incidence	4745		3	Both	27	Age-standardized	683	Periodontal diseases	3	Rate	1990	2021	4.01192	32.0982	-15.1248
395	6	Incidence	35427	Miyagi	3	Both	27	Age-standardized	683	Periodontal diseases	3	Rate	1990	2021	3.45357	44.2172	-22.0042
396	6	Incidence	4661	Nuevo Le贸n	3	Both	27	Age-standardized	683	Periodontal diseases	3	Rate	1990	2021	-3.24081	21.4887	-21.2345
397	6	Incidence	4619	North West England	3	Both	27	Age-standardized	683	Periodontal diseases	3	Rate	1990	2021	-9.33543	40.1492	-38.2101
398	6	Incidence	4760	Minas Gerais	3	Both	27	Age-standardized	683	Periodontal diseases	3	Rate	1990	2021	8.60007	13.3108	3.71685
399	6	Incidence	4722	Central Java	3	Both	27	Age-standardized	683	Periodontal diseases	3	Rate	1990	2021	0.940595	4.31054	-2.59262
400	6	Incidence	541	Louisiana	3	Both	27	Age-standardized	683	Periodontal diseases	3	Rate	1990	2021	-3.2342	1.75161	-8.36729
401	6	Incidence	4717	Bangka-Belitung Islands	3	Both	27	Age-standardized	683	Periodontal diseases	3	Rate	1990	2021	0.106541	2.86305	-2.81416
402	6	Incidence	4775	S茫o Paulo	3	Both	27	Age-standardized	683	Periodontal diseases	3	Rate	1990	2021	10.1866	45.935	-12.9671
403	6	Incidence	4753	Amap谩	3	Both	27	Age-standardized	683	Periodontal diseases	3	Rate	1990	2021	7.71992	13.1708	3.07046
404	6	Incidence	4910	Oslo	3	Both	27	Age-standardized	683	Periodontal diseases	3	Rate	1990	2021	-4.52139	20.4958	-22.1046
405	6	Incidence	548	Missouri	3	Both	27	Age-standardized	683	Periodontal diseases	3	Rate	1990	2021	-11.2897	20.5061	-34.4726
406	6	Incidence	563	South Carolina	3	Both	27	Age-standardized	683	Periodontal diseases	3	Rate	1990	2021	-11.1043	20.8663	-33.9231
407	6	Incidence	4649	Chiapas	3	Both	27	Age-standardized	683	Periodontal diseases	3	Rate	1990	2021	-4.35677	26.6459	-24.6807
408	6	Incidence	35439	Toyama	3	Both	27	Age-standardized	683	Periodontal diseases	3	Rate	1990	2021	2.79992	42.8157	-22.3365
409	6	Incidence	4624	Greater London	3	Both	27	Age-standardized	683	Periodontal diseases	3	Rate	1990	2021	-8.34521	32.6329	-32.3511
410	6	Incidence	558	Ohio	3	Both	27	Age-standardized	683	Periodontal diseases	3	Rate	1990	2021	-11.2849	17.9465	-33.5663
411	6	Incidence	4770	Rond么nia	3	Both	27	Age-standardized	683	Periodontal diseases	3	Rate	1990	2021	5.72938	39.9584	-15.8329
412	6	Incidence	4727	West Nusa Tenggara	3	Both	27	Age-standardized	683	Periodontal diseases	3	Rate	1990	2021	4.27681	9.7816	0.527408
413	6	Incidence	4732	East Kalimantan	3	Both	27	Age-standardized	683	Periodontal diseases	3	Rate	1990	2021	1.0977	3.84523	-1.77846
414	6	Incidence	4666	San Luis Potos铆	3	Both	27	Age-standardized	683	Periodontal diseases	3	Rate	1990	2021	3.31198	8.39494	-0.123298
415	6	Incidence	35432	Tochigi	3	Both	27	Age-standardized	683	Periodontal diseases	3	Rate	1990	2021	2.4903	44.9323	-23.1166
416	6	Incidence	565	Tennessee	3	Both	27	Age-standardized	683	Periodontal diseases	3	Rate	1990	2021	-10.8933	20.7804	-33.6518
417	6	Incidence	35447	Mie	3	Both	27	Age-standardized	683	Periodontal diseases	3	Rate	1990	2021	4.98926	45.1133	-21.1867
418	6	Incidence	553	New Jersey	3	Both	27	Age-standardized	683	Periodontal diseases	3	Rate	1990	2021	-10.174	21.7867	-31.5049
419	6	Incidence	4844	Bihar	3	Both	27	Age-standardized	683	Periodontal diseases	3	Rate	1990	2021	0.241252	5.47042	-4.16619
420	6	Incidence	4873	Uttar Pradesh	3	Both	27	Age-standardized	683	Periodontal diseases	3	Rate	1990	2021	-0.886715	22.6783	-16.9388
421	6	Incidence	4871	Telangana	3	Both	27	Age-standardized	683	Periodontal diseases	3	Rate	1990	2021	2.92788	30.0262	-17.2162
422	6	Incidence	4865	Odisha	3	Both	27	Age-standardized	683	Periodontal diseases	3	Rate	1990	2021	0.739681	33.1388	-20.3613
423	6	Incidence	4737	Gorontalo	3	Both	27	Age-standardized	683	Periodontal diseases	3	Rate	1990	2021	-0.245329	2.67402	-3.20621
424	6	Incidence	4644	Baja California	3	Both	27	Age-standardized	683	Periodontal diseases	3	Rate	1990	2021	-4.23174	20.8531	-22.1345
425	6	Incidence	536	Illinois	3	Both	27	Age-standardized	683	Periodontal diseases	3	Rate	1990	2021	-10.897	22.1796	-32.7584
426	6	Incidence	568	Vermont	3	Both	27	Age-standardized	683	Periodontal diseases	3	Rate	1990	2021	-3.4192	0.869951	-9.74138
427	6	Incidence	4852	Haryana	3	Both	27	Age-standardized	683	Periodontal diseases	3	Rate	1990	2021	-6.28419	10.1244	-20.9831
428	6	Incidence	531	District of Columbia	3	Both	27	Age-standardized	683	Periodontal diseases	3	Rate	1990	2021	-2.05269	3.42128	-7.7625
429	6	Incidence	4710	North Sumatra	3	Both	27	Age-standardized	683	Periodontal diseases	3	Rate	1990	2021	1.29619	3.91648	-1.82691
430	6	Incidence	4763	Par谩	3	Both	27	Age-standardized	683	Periodontal diseases	3	Rate	1990	2021	9.33122	15.1576	4.27417
431	6	Incidence	4768	Rio de Janeiro	3	Both	27	Age-standardized	683	Periodontal diseases	3	Rate	1990	2021	3.67058	8.41397	-0.337922
432	6	Incidence	4671	Tlaxcala	3	Both	27	Age-standardized	683	Periodontal diseases	3	Rate	1990	2021	2.69763	6.10664	0.0279374
433	6	Incidence	35437	Kanagawa	3	Both	27	Age-standardized	683	Periodontal diseases	3	Rate	1990	2021	1.56392	43.015	-23.879
434	6	Incidence	4654	Guerrero	3	Both	27	Age-standardized	683	Periodontal diseases	3	Rate	1990	2021	-4.69088	24.7041	-24.4712
435	6	Incidence	4664	Quer茅taro	3	Both	27	Age-standardized	683	Periodontal diseases	3	Rate	1990	2021	1.44541	4.37254	-1.38544
436	6	Incidence	4944	Stockholm	3	Both	27	Age-standardized	683	Periodontal diseases	3	Rate	1990	2021	-9.10703	21.4705	-31.1118
437	6	Incidence	35435	Chiba	3	Both	27	Age-standardized	683	Periodontal diseases	3	Rate	1990	2021	3.25628	41.4759	-22.6897
438	6	Incidence	35425	Aomori	3	Both	27	Age-standardized	683	Periodontal diseases	3	Rate	1990	2021	5.3112	47.5806	-20.9395
439	6	Incidence	4773	Santa Catarina	3	Both	27	Age-standardized	683	Periodontal diseases	3	Rate	1990	2021	4.43819	38.3533	-18.2052
440	6	Incidence	4751	Alagoas	3	Both	27	Age-standardized	683	Periodontal diseases	3	Rate	1990	2021	9.97009	16.3034	3.98158
441	6	Incidence	4857	Kerala	3	Both	27	Age-standardized	683	Periodontal diseases	3	Rate	1990	2021	3.03593	32.4973	-17.0045
442	6	Incidence	35442	Yamanashi	3	Both	27	Age-standardized	683	Periodontal diseases	3	Rate	1990	2021	2.88438	43.7589	-23.7159
443	6	Incidence	4720	Jakarta	3	Both	27	Age-standardized	683	Periodontal diseases	3	Rate	1990	2021	3.81754	8.28194	0.620352
444	6	Incidence	4715	Bengkulu	3	Both	27	Age-standardized	683	Periodontal diseases	3	Rate	1990	2021	0.238598	3.35328	-3.08044
445	6	Incidence	4659	Morelos	3	Both	27	Age-standardized	683	Periodontal diseases	3	Rate	1990	2021	-4.0913	23.1137	-23.2059
446	6	Incidence	4742	Papua	3	Both	27	Age-standardized	683	Periodontal diseases	3	Rate	1990	2021	-0.737719	1.7	-3.92543
447	6	Incidence	573	Wyoming	3	Both	27	Age-standardized	683	Periodontal diseases	3	Rate	1990	2021	-2.95513	2.11099	-8.67238
448	6	Incidence	4923	M酶re og Romsdal	3	Both	27	Age-standardized	683	Periodontal diseases	3	Rate	1990	2021	-4.23922	19.6206	-22.2143
449	6	Incidence	4863	Mizoram	3	Both	27	Age-standardized	683	Periodontal diseases	3	Rate	1990	2021	4.09841	22.1451	-8.29596
450	6	Incidence	4758	Goi谩s	3	Both	27	Age-standardized	683	Periodontal diseases	3	Rate	1990	2021	12.0122	19.003	6.17167
451	6	Incidence	4842	Arunachal Pradesh	3	Both	27	Age-standardized	683	Periodontal diseases	3	Rate	1990	2021	0.0508835	28.6521	-20.1634
452	6	Incidence	4869	Sikkim	3	Both	27	Age-standardized	683	Periodontal diseases	3	Rate	1990	2021	8.41307	29.3981	-4.19554
453	6	Incidence	4761	Mato Grosso do Sul	3	Both	27	Age-standardized	683	Periodontal diseases	3	Rate	1990	2021	9.67158	15.7208	4.76701
454	6	Incidence	4725	Banten	3	Both	27	Age-standardized	683	Periodontal diseases	3	Rate	1990	2021	-0.192394	3.39057	-3.40588
455	6	Incidence	4766	Pernambuco	3	Both	27	Age-standardized	683	Periodontal diseases	3	Rate	1990	2021	10.2617	15.7938	4.87656
456	6	Incidence	35445	Shizuoka	3	Both	27	Age-standardized	683	Periodontal diseases	3	Rate	1990	2021	3.23802	44.364	-22.6739
457	6	Incidence	35452	Nara	3	Both	27	Age-standardized	683	Periodontal diseases	3	Rate	1990	2021	3.93276	46.102	-22.8554
458	6	Incidence	4854	Jammu & Kashmir and Ladakh	3	Both	27	Age-standardized	683	Periodontal diseases	3	Rate	1990	2021	0.177836	31.4685	-19.949
459	6	Incidence	4756	Distrito Federal	3	Both	27	Age-standardized	683	Periodontal diseases	3	Rate	1990	2021	11.8573	18.6099	5.77801
460	6	Incidence	4850	Goa	3	Both	27	Age-standardized	683	Periodontal diseases	3	Rate	1990	2021	2.33959	27.6692	-16.1254
461	6	Incidence	35428	Akita	3	Both	27	Age-standardized	683	Periodontal diseases	3	Rate	1990	2021	4.00709	48.6247	-23.0344
462	6	Incidence	35433	Gunma	3	Both	27	Age-standardized	683	Periodontal diseases	3	Rate	1990	2021	3.5172	44.4857	-23.4798
463	6	Incidence	4860	Maharashtra	3	Both	27	Age-standardized	683	Periodontal diseases	3	Rate	1990	2021	4.07047	17.766	-6.06046
464	6	Incidence	4730	Central Kalimantan	3	Both	27	Age-standardized	683	Periodontal diseases	3	Rate	1990	2021	0.903616	4.14729	-2.35444
465	6	Incidence	4874	Uttarakhand	3	Both	27	Age-standardized	683	Periodontal diseases	3	Rate	1990	2021	5.30141	28.2634	-9.03333
466	6	Incidence	35448	Shiga	3	Both	27	Age-standardized	683	Periodontal diseases	3	Rate	1990	2021	2.02085	40.8593	-23.1357
467	6	Incidence	35450	艑saka	3	Both	27	Age-standardized	683	Periodontal diseases	3	Rate	1990	2021	1.29004	41.0064	-23.6672
468	6	Incidence	35440	Ishikawa	3	Both	27	Age-standardized	683	Periodontal diseases	3	Rate	1990	2021	2.9973	46.1045	-22.8224
469	6	Incidence	4867	Punjab	3	Both	27	Age-standardized	683	Periodontal diseases	3	Rate	1990	2021	3.16973	15.828	-5.56369
470	6	Incidence	35438	Niigata	3	Both	27	Age-standardized	683	Periodontal diseases	3	Rate	1990	2021	3.41874	40.9462	-22.7592
471	6	Incidence	35430	Fukushima	3	Both	27	Age-standardized	683	Periodontal diseases	3	Rate	1990	2021	3.47785	44.5465	-22.3814
472	6	Incidence	35456	Okayama	3	Both	27	Age-standardized	683	Periodontal diseases	3	Rate	1990	2021	3.02243	43.9347	-22.1836
473	6	Incidence	35461	Ehime	3	Both	27	Age-standardized	683	Periodontal diseases	3	Rate	1990	2021	4.57073	45.7233	-22.5161
474	6	Incidence	35426	Iwate	3	Both	27	Age-standardized	683	Periodontal diseases	3	Rate	1990	2021	4.87581	48.3588	-21.9868
475	6	Incidence	35454	Tottori	3	Both	27	Age-standardized	683	Periodontal diseases	3	Rate	1990	2021	1.97479	40.9855	-23.6357
476	6	Incidence	35443	Nagano	3	Both	27	Age-standardized	683	Periodontal diseases	3	Rate	1990	2021	3.2036	43.4705	-22.484
477	6	Incidence	35436	T艒ky艒	3	Both	27	Age-standardized	683	Periodontal diseases	3	Rate	1990	2021	1.3582	42.7457	-22.6415
478	6	Incidence	35466	Kumamoto	3	Both	27	Age-standardized	683	Periodontal diseases	3	Rate	1990	2021	3.17201	44.7553	-22.8387
479	6	Incidence	4926	Nordland	3	Both	27	Age-standardized	683	Periodontal diseases	3	Rate	1990	2021	-4.20495	20.6788	-21.8808
480	6	Incidence	35459	Tokushima	3	Both	27	Age-standardized	683	Periodontal diseases	3	Rate	1990	2021	6.09935	51.6176	-20.0923
481	6	Incidence	35453	Wakayama	3	Both	27	Age-standardized	683	Periodontal diseases	3	Rate	1990	2021	5.58125	48.6148	-21.3152
482	6	Incidence	4855	Jharkhand	3	Both	27	Age-standardized	683	Periodontal diseases	3	Rate	1990	2021	3.57768	12.5735	-2.92254
483	6	Incidence	35464	Saga	3	Both	27	Age-standardized	683	Periodontal diseases	3	Rate	1990	2021	3.8878	47.6814	-24.1871
484	6	Incidence	4861	Manipur	3	Both	27	Age-standardized	683	Periodontal diseases	3	Rate	1990	2021	-2.48214	27.3847	-23.3577
485	6	Incidence	35469	Kagoshima	3	Both	27	Age-standardized	683	Periodontal diseases	3	Rate	1990	2021	5.35431	50.107	-21.6629
486	6	Incidence	35431	Ibaraki	3	Both	27	Age-standardized	683	Periodontal diseases	3	Rate	1990	2021	3.81637	44.2259	-22.121
487	6	Incidence	35457	Hiroshima	3	Both	27	Age-standardized	683	Periodontal diseases	3	Rate	1990	2021	2.45243	44.638	-23.3208
488	6	Incidence	35462	K艒chi	3	Both	27	Age-standardized	683	Periodontal diseases	3	Rate	1990	2021	4.31121	45.2492	-22.8469
489	6	Incidence	35455	Shimane	3	Both	27	Age-standardized	683	Periodontal diseases	3	Rate	1990	2021	5.53671	47.9083	-20.6235
490	6	Incidence	35467	艑ita	3	Both	27	Age-standardized	683	Periodontal diseases	3	Rate	1990	2021	4.24485	48.4073	-22.362
491	6	Incidence	35460	Kagawa	3	Both	27	Age-standardized	683	Periodontal diseases	3	Rate	1990	2021	3.95696	46.1637	-21.7839
492	6	Incidence	35630	Kilifi	3	Both	27	Age-standardized	683	Periodontal diseases	3	Rate	1990	2021	-4.56012	20.4353	-21.8694
493	6	Incidence	35470	Okinawa	3	Both	27	Age-standardized	683	Periodontal diseases	3	Rate	1990	2021	3.8385	45.9151	-23.6923
494	6	Incidence	35635	Kwale	3	Both	27	Age-standardized	683	Periodontal diseases	3	Rate	1990	2021	-4.41827	19.7274	-21.872
495	6	Incidence	35465	Nagasaki	3	Both	27	Age-standardized	683	Periodontal diseases	3	Rate	1990	2021	4.75391	47.2963	-22.7244
496	6	Incidence	35640	Mandera	3	Both	27	Age-standardized	683	Periodontal diseases	3	Rate	1990	2021	-4.56737	22.482	-23.2847
497	6	Incidence	35618	Bomet	3	Both	27	Age-standardized	683	Periodontal diseases	3	Rate	1990	2021	-4.70366	21.5772	-21.4163
498	6	Incidence	35623	Garissa	3	Both	27	Age-standardized	683	Periodontal diseases	3	Rate	1990	2021	-4.23833	21.9133	-21.9654
499	6	Incidence	35458	Yamaguchi	3	Both	27	Age-standardized	683	Periodontal diseases	3	Rate	1990	2021	4.28276	45.6134	-21.8331
500	6	Incidence	35662	Wajir	3	Both	27	Age-standardized	683	Periodontal diseases	3	Rate	1990	2021	-5.37017	22.0609	-24.1257
501	6	Incidence	35628	Kericho	3	Both	27	Age-standardized	683	Periodontal diseases	3	Rate	1990	2021	-4.37576	20.8804	-21.9383
502	6	Incidence	35633	Kisumu	3	Both	27	Age-standardized	683	Periodontal diseases	3	Rate	1990	2021	-4.65609	20.5589	-21.9082
503	6	Incidence	35463	Fukuoka	3	Both	27	Age-standardized	683	Periodontal diseases	3	Rate	1990	2021	3.00076	45.721	-23.0936
504	6	Incidence	35645	Murang'a	3	Both	27	Age-standardized	683	Periodontal diseases	3	Rate	1990	2021	-4.70501	17.651	-21.8594
505	6	Incidence	35650	Nyamira	3	Both	27	Age-standardized	683	Periodontal diseases	3	Rate	1990	2021	-4.08956	21.4705	-21.7614
506	6	Incidence	35660	Uasin Gishu	3	Both	27	Age-standardized	683	Periodontal diseases	3	Rate	1990	2021	-4.70893	18.2743	-22.024
507	6	Incidence	35638	Machakos	3	Both	27	Age-standardized	683	Periodontal diseases	3	Rate	1990	2021	-4.93267	18.8581	-22.1607
508	6	Incidence	35468	Miyazaki	3	Both	27	Age-standardized	683	Periodontal diseases	3	Rate	1990	2021	5.1976	49.7233	-21.859
509	6	Incidence	35643	Migori	3	Both	27	Age-standardized	683	Periodontal diseases	3	Rate	1990	2021	-4.74686	20.9543	-22.8184
510	6	Incidence	35621	Elgeyo-Marakwet	3	Both	27	Age-standardized	683	Periodontal diseases	3	Rate	1990	2021	-4.71592	22.8134	-23.2727
511	6	Incidence	35655	Taita Taveta	3	Both	27	Age-standardized	683	Periodontal diseases	3	Rate	1990	2021	-4.34498	20.9099	-21.8368
512	6	Incidence	35648	Nandi	3	Both	27	Age-standardized	683	Periodontal diseases	3	Rate	1990	2021	-4.9012	18.4907	-22.0967
513	6	Incidence	35631	Kirinyaga	3	Both	27	Age-standardized	683	Periodontal diseases	3	Rate	1990	2021	-4.03761	22.0303	-21.3008
514	6	Incidence	44536	Commonwealth Middle Income	3	Both	27	Age-standardized	683	Periodontal diseases	3	Rate	1990	2021	-6.41883	11.2318	-18.9325
515	6	Incidence	35617	Baringo	3	Both	27	Age-standardized	683	Periodontal diseases	3	Rate	1990	2021	-5.20658	19.7755	-23.2733
516	6	Incidence	35636	Laikipia	3	Both	27	Age-standardized	683	Periodontal diseases	3	Rate	1990	2021	-3.99071	18.227	-21.3876
517	6	Incidence	35626	Kajiado	3	Both	27	Age-standardized	683	Periodontal diseases	3	Rate	1990	2021	-1.35585	2.37781	-5.0336
518	6	Incidence	44559	Africa	3	Both	27	Age-standardized	683	Periodontal diseases	3	Rate	1990	2021	-22.0906	-4.77382	-34.3457
519	6	Incidence	35619	Bungoma	3	Both	27	Age-standardized	683	Periodontal diseases	3	Rate	1990	2021	-4.59683	19.9622	-23.1065
520	6	Incidence	35624	Homa Bay	3	Both	27	Age-standardized	683	Periodontal diseases	3	Rate	1990	2021	-4.79054	20.6888	-23.1848
521	6	Incidence	35641	Marsabit	3	Both	27	Age-standardized	683	Periodontal diseases	3	Rate	1990	2021	-4.51583	21.6561	-22.7088
522	6	Incidence	35653	Samburu	3	Both	27	Age-standardized	683	Periodontal diseases	3	Rate	1990	2021	-5.97886	20.025	-24.8617
523	6	Incidence	35634	Kitui	3	Both	27	Age-standardized	683	Periodontal diseases	3	Rate	1990	2021	-4.39531	22.0315	-22.4486
524	6	Incidence	44534	Commonwealth	3	Both	27	Age-standardized	683	Periodontal diseases	3	Rate	1990	2021	-5.75793	14.5555	-19.4009
525	6	Incidence	44564	Region of the Americas	3	Both	27	Age-standardized	683	Periodontal diseases	3	Rate	1990	2021	0.631417	19.4521	-12.8778
526	6	Incidence	35658	Trans Nzoia	3	Both	27	Age-standardized	683	Periodontal diseases	3	Rate	1990	2021	-4.71385	19.8919	-21.4868
527	6	Incidence	35663	West Pokot	3	Both	27	Age-standardized	683	Periodontal diseases	3	Rate	1990	2021	-5.18584	21.0195	-22.7313
528	6	Incidence	44575	World Bank High Income	3	Both	27	Age-standardized	683	Periodontal diseases	3	Rate	1990	2021	-2.77986	23.754	-20.6382
529	6	Incidence	44635	High SDI	3	Both	27	Age-standardized	683	Periodontal diseases	3	Rate	1990	2021	-0.579548	23.7853	-17.4171
530	6	Incidence	44644	Northumberland	3	Both	27	Age-standardized	683	Periodontal diseases	3	Rate	1990	2021	-9.08853	40.223	-36.8537
531	6	Incidence	35629	Kiambu	3	Both	27	Age-standardized	683	Periodontal diseases	3	Rate	1990	2021	-4.63834	21.6766	-21.8188
532	6	Incidence	35651	Nyandarua	3	Both	27	Age-standardized	683	Periodontal diseases	3	Rate	1990	2021	-4.37177	21.1067	-21.6989
533	6	Incidence	35646	Nairobi	3	Both	27	Age-standardized	683	Periodontal diseases	3	Rate	1990	2021	-3.81616	16.5585	-20.779
534	6	Incidence	44642	Nordic Region	3	Both	27	Age-standardized	683	Periodontal diseases	3	Rate	1990	2021	-4.37433	19.4695	-21.3616
535	6	Incidence	44562	Europe	3	Both	27	Age-standardized	683	Periodontal diseases	3	Rate	1990	2021	-1.22074	29.2728	-21.8174
536	6	Incidence	44567	Eastern Mediterranean Region	3	Both	27	Age-standardized	683	Periodontal diseases	3	Rate	1990	2021	2.85798	24.9964	-13.7547
537	6	Incidence	44649	County Durham	3	Both	27	Age-standardized	683	Periodontal diseases	3	Rate	1990	2021	-8.13537	43.6519	-36.9522
538	6	Incidence	35661	Vihiga	3	Both	27	Age-standardized	683	Periodontal diseases	3	Rate	1990	2021	-4.47689	20.4144	-22.0471
539	6	Incidence	44586	G20	3	Both	27	Age-standardized	683	Periodontal diseases	3	Rate	1990	2021	4.52965	23.0196	-7.68401
540	6	Incidence	44654	Hartlepool	3	Both	27	Age-standardized	683	Periodontal diseases	3	Rate	1990	2021	-9.17804	44.0962	-37.9482
541	6	Incidence	35622	Embu	3	Both	27	Age-standardized	683	Periodontal diseases	3	Rate	1990	2021	-4.09458	20.6145	-21.4055
542	6	Incidence	35639	Makueni	3	Both	27	Age-standardized	683	Periodontal diseases	3	Rate	1990	2021	-4.58544	20.8198	-22.3498
543	6	Incidence	35656	Tana River	3	Both	27	Age-standardized	683	Periodontal diseases	3	Rate	1990	2021	-4.29618	21.5829	-22.8234
544	6	Incidence	35644	Mombasa	3	Both	27	Age-standardized	683	Periodontal diseases	3	Rate	1990	2021	-4.2885	20.0423	-21.3221
545	6	Incidence	44647	North Tyneside	3	Both	27	Age-standardized	683	Periodontal diseases	3	Rate	1990	2021	-6.82773	43.8685	-36.1129
546	6	Incidence	35632	Kisii	3	Both	27	Age-standardized	683	Periodontal diseases	3	Rate	1990	2021	-4.3833	22.8761	-22.1907
547	6	Incidence	44659	Sefton	3	Both	27	Age-standardized	683	Periodontal diseases	3	Rate	1990	2021	-10.5712	37.8358	-39.5346
548	6	Incidence	44591	World Bank Income Levels	3	Both	27	Age-standardized	683	Periodontal diseases	3	Rate	1990	2021	0.00992514	19.2091	-13.1667
549	6	Incidence	35627	Kakamega	3	Both	27	Age-standardized	683	Periodontal diseases	3	Rate	1990	2021	-4.86187	21.3887	-22.5501
550	6	Incidence	44537	Commonwealth Low Income	3	Both	27	Age-standardized	683	Periodontal diseases	3	Rate	1990	2021	-13.279	13.3119	-30.646
551	6	Incidence	35649	Narok	3	Both	27	Age-standardized	683	Periodontal diseases	3	Rate	1990	2021	-5.48279	18.6683	-23.8407
552	6	Incidence	35637	Lamu	3	Both	27	Age-standardized	683	Periodontal diseases	3	Rate	1990	2021	-4.71516	20.1075	-21.8129
553	6	Incidence	35659	Turkana	3	Both	27	Age-standardized	683	Periodontal diseases	3	Rate	1990	2021	-5.77808	20.5123	-24.4037
554	6	Incidence	44638	North America	3	Both	27	Age-standardized	683	Periodontal diseases	3	Rate	1990	2021	-5.87823	11.7065	-18.4502
555	6	Incidence	44669	Wigan	3	Both	27	Age-standardized	683	Periodontal diseases	3	Rate	1990	2021	-10.4188	39.8317	-39.9999
556	6	Incidence	44664	Bury	3	Both	27	Age-standardized	683	Periodontal diseases	3	Rate	1990	2021	-9.71472	38.758	-38.4368
557	6	Incidence	44652	South Tyneside	3	Both	27	Age-standardized	683	Periodontal diseases	3	Rate	1990	2021	-6.01262	46.1025	-35.9617
558	6	Incidence	44578	World Bank Low Income	3	Both	27	Age-standardized	683	Periodontal diseases	3	Rate	1990	2021	-19.2664	-3.51055	-30.0171
559	6	Incidence	44657	Trafford	3	Both	27	Age-standardized	683	Periodontal diseases	3	Rate	1990	2021	-10.24	36.608	-38.0075
560	6	Incidence	35625	Isiolo	3	Both	27	Age-standardized	683	Periodontal diseases	3	Rate	1990	2021	-5.31847	18.7987	-22.9293
561	6	Incidence	44560	America	3	Both	27	Age-standardized	683	Periodontal diseases	3	Rate	1990	2021	0.631417	19.4521	-12.8778
562	6	Incidence	35642	Meru	3	Both	27	Age-standardized	683	Periodontal diseases	3	Rate	1990	2021	-4.16581	20.6026	-21.1637
563	6	Incidence	44676	Blackpool	3	Both	27	Age-standardized	683	Periodontal diseases	3	Rate	1990	2021	-10.9387	39.4511	-39.9802
564	6	Incidence	35620	Busia	3	Both	27	Age-standardized	683	Periodontal diseases	3	Rate	1990	2021	-4.9492	19.5716	-22.9252
565	6	Incidence	44565	South-East Asia Region	3	Both	27	Age-standardized	683	Periodontal diseases	3	Rate	1990	2021	2.23437	21.2301	-10.2241
566	6	Incidence	35647	Nakuru	3	Both	27	Age-standardized	683	Periodontal diseases	3	Rate	1990	2021	-4.1394	21.3112	-21.3929
567	6	Incidence	44535	Commonwealth High Income	3	Both	27	Age-standardized	683	Periodontal diseases	3	Rate	1990	2021	2.2854	39.2382	-20.8362
568	6	Incidence	35654	Siaya	3	Both	27	Age-standardized	683	Periodontal diseases	3	Rate	1990	2021	-4.22436	22.0413	-23.049
569	6	Incidence	44645	Stockton-on-Tees	3	Both	27	Age-standardized	683	Periodontal diseases	3	Rate	1990	2021	-10.056	37.3441	-38.2782
570	6	Incidence	44662	Bolton	3	Both	27	Age-standardized	683	Periodontal diseases	3	Rate	1990	2021	-10.4788	38.2499	-39.6404
571	6	Incidence	44636	Low-middle SDI	3	Both	27	Age-standardized	683	Periodontal diseases	3	Rate	1990	2021	-1.54439	19.0449	-15.4941
572	6	Incidence	44686	Leeds	3	Both	27	Age-standardized	683	Periodontal diseases	3	Rate	1990	2021	-10.0091	37.8009	-38.6684
573	6	Incidence	44576	World Bank Upper Middle Income	3	Both	27	Age-standardized	683	Periodontal diseases	3	Rate	1990	2021	1.10706	19.4014	-11.1095
574	6	Incidence	44691	Kingston upon Hull, City of	3	Both	27	Age-standardized	683	Periodontal diseases	3	Rate	1990	2021	-8.76686	43.7045	-36.7619
575	6	Incidence	44563	African Region	3	Both	27	Age-standardized	683	Periodontal diseases	3	Rate	1990	2021	-27.2176	-11.4809	-38.4716
576	6	Incidence	44696	Rutland	3	Both	27	Age-standardized	683	Periodontal diseases	3	Rate	1990	2021	-11.0331	37.2773	-39.2522
577	6	Incidence	44650	Gateshead	3	Both	27	Age-standardized	683	Periodontal diseases	3	Rate	1990	2021	-8.54065	41.9553	-37.7021
578	6	Incidence	44672	Tameside	3	Both	27	Age-standardized	683	Periodontal diseases	3	Rate	1990	2021	-11.3881	38.7847	-40.1009
579	6	Incidence	44681	North East Lincolnshire	3	Both	27	Age-standardized	683	Periodontal diseases	3	Rate	1990	2021	-8.80589	40.8017	-37.2128
580	6	Incidence	35652	Nyeri	3	Both	27	Age-standardized	683	Periodontal diseases	3	Rate	1990	2021	-4.68165	21.375	-23.1379
581	6	Incidence	44643	Darlington	3	Both	27	Age-standardized	683	Periodontal diseases	3	Rate	1990	2021	-9.10974	42.1253	-38.0976
582	6	Incidence	44708	Dudley	3	Both	27	Age-standardized	683	Periodontal diseases	3	Rate	1990	2021	-12.1711	36.9631	-40.4648
583	6	Incidence	44684	Bradford	3	Both	27	Age-standardized	683	Periodontal diseases	3	Rate	1990	2021	-12.016	39.9825	-40.4712
584	6	Incidence	44568	Western Pacific Region	3	Both	27	Age-standardized	683	Periodontal diseases	3	Rate	1990	2021	-4.95732	11.8088	-16.1584
585	6	Incidence	44587	African Union	3	Both	27	Age-standardized	683	Periodontal diseases	3	Rate	1990	2021	-22.0906	-4.77382	-34.3457
586	6	Incidence	44667	Oldham	3	Both	27	Age-standardized	683	Periodontal diseases	3	Rate	1990	2021	-10.4949	41.9781	-39.5988
587	6	Incidence	44655	Cheshire East	3	Both	27	Age-standardized	683	Periodontal diseases	3	Rate	1990	2021	-7.91444	40.9149	-36.1798
588	6	Incidence	44713	Wolverhampton	3	Both	27	Age-standardized	683	Periodontal diseases	3	Rate	1990	2021	-12.3044	35.3012	-40.3794
589	6	Incidence	44701	Leicester	3	Both	27	Age-standardized	683	Periodontal diseases	3	Rate	1990	2021	-11.9007	37.7213	-39.145
590	6	Incidence	44538	Other Union Territories	3	Both	27	Age-standardized	683	Periodontal diseases	3	Rate	1990	2021	-0.851205	24.4522	-19.3391
591	6	Incidence	44674	Blackburn with Darwen	3	Both	27	Age-standardized	683	Periodontal diseases	3	Rate	1990	2021	-10.7531	38.5559	-38.2774
592	6	Incidence	35657	Tharaka Nithi	3	Both	27	Age-standardized	683	Periodontal diseases	3	Rate	1990	2021	-3.99872	21.9851	-21.0567
593	6	Incidence	44660	Lancashire	3	Both	27	Age-standardized	683	Periodontal diseases	3	Rate	1990	2021	-10.0573	38.5364	-38.9596
594	6	Incidence	44648	Redcar and Cleveland	3	Both	27	Age-standardized	683	Periodontal diseases	3	Rate	1990	2021	-8.23305	43.135	-36.924
595	6	Incidence	44634	High-middle SDI	3	Both	27	Age-standardized	683	Periodontal diseases	3	Rate	1990	2021	-1.47601	24.1281	-18.1929
596	6	Incidence	44718	Suffolk	3	Both	27	Age-standardized	683	Periodontal diseases	3	Rate	1990	2021	-11.1313	33.5508	-39.0023
597	6	Incidence	44711	Stoke-on-Trent	3	Both	27	Age-standardized	683	Periodontal diseases	3	Rate	1990	2021	-10.9945	37.2706	-39.621
598	6	Incidence	44584	OECD Countries	3	Both	27	Age-standardized	683	Periodontal diseases	3	Rate	1990	2021	1.29393	28.3513	-16.9054
599	6	Incidence	44706	Worcestershire	3	Both	27	Age-standardized	683	Periodontal diseases	3	Rate	1990	2021	-10.1183	38.3906	-37.9961
600	6	Incidence	44716	Bedford	3	Both	27	Age-standardized	683	Periodontal diseases	3	Rate	1990	2021	-9.79789	38.3856	-38.1228
601	6	Incidence	44639	Middle SDI	3	Both	27	Age-standardized	683	Periodontal diseases	3	Rate	1990	2021	-0.0337017	15.5994	-10.5874
602	6	Incidence	44679	East Riding of Yorkshire	3	Both	27	Age-standardized	683	Periodontal diseases	3	Rate	1990	2021	-10.6917	38.0435	-38.655
603	6	Incidence	44740	Harrow	3	Both	27	Age-standardized	683	Periodontal diseases	3	Rate	1990	2021	-11.7175	33.3742	-38.9319
604	6	Incidence	44665	St Helens	3	Both	27	Age-standardized	683	Periodontal diseases	3	Rate	1990	2021	-7.39893	42.1172	-36.4454
605	6	Incidence	44670	Halton	3	Both	27	Age-standardized	683	Periodontal diseases	3	Rate	1990	2021	-7.5479	42.9361	-36.3308
606	6	Incidence	44653	Sunderland	3	Both	27	Age-standardized	683	Periodontal diseases	3	Rate	1990	2021	-7.69925	42.5064	-36.2517
607	6	Incidence	44694	Leicestershire	3	Both	27	Age-standardized	683	Periodontal diseases	3	Rate	1990	2021	-9.37119	41.3653	-38.3825
608	6	Incidence	44658	Cheshire West and Chester	3	Both	27	Age-standardized	683	Periodontal diseases	3	Rate	1990	2021	-9.24844	37.92	-37.2696
609	6	Incidence	44677	Manchester	3	Both	27	Age-standardized	683	Periodontal diseases	3	Rate	1990	2021	-9.98998	38.1489	-38.0818
610	6	Incidence	44723	Norfolk	3	Both	27	Age-standardized	683	Periodontal diseases	3	Rate	1990	2021	-9.28392	40.2859	-37.6618
611	6	Incidence	44745	Greenwich	3	Both	27	Age-standardized	683	Periodontal diseases	3	Rate	1990	2021	-10.6309	39.8293	-38.8568
612	6	Incidence	44561	Asia	3	Both	27	Age-standardized	683	Periodontal diseases	3	Rate	1990	2021	3.65707	22.0494	-8.61866
613	6	Incidence	44566	European Region	3	Both	27	Age-standardized	683	Periodontal diseases	3	Rate	1990	2021	-1.52874	29.1269	-22.4426
614	6	Incidence	44646	Newcastle upon Tyne	3	Both	27	Age-standardized	683	Periodontal diseases	3	Rate	1990	2021	-8.78471	40.0427	-37.6499
615	6	Incidence	44637	Low SDI	3	Both	27	Age-standardized	683	Periodontal diseases	3	Rate	1990	2021	-19.6517	-5.96381	-29.6148
616	6	Incidence	44663	Wirral	3	Both	27	Age-standardized	683	Periodontal diseases	3	Rate	1990	2021	-9.9672	39.0853	-38.7831
617	6	Incidence	44728	Kensington and Chelsea	3	Both	27	Age-standardized	683	Periodontal diseases	3	Rate	1990	2021	-8.27652	35.942	-34.9429
618	6	Incidence	44577	World Bank Lower Middle Income	3	Both	27	Age-standardized	683	Periodontal diseases	3	Rate	1990	2021	-4.49334	14.0327	-17.3591
619	6	Incidence	44692	Barnsley	3	Both	27	Age-standardized	683	Periodontal diseases	3	Rate	1990	2021	-9.21591	43.7282	-38.571
620	6	Incidence	44738	Kingston upon Thames	3	Both	27	Age-standardized	683	Periodontal diseases	3	Rate	1990	2021	-10.7978	38.6649	-39.049
621	6	Incidence	44682	Calderdale	3	Both	27	Age-standardized	683	Periodontal diseases	3	Rate	1990	2021	-9.31954	40.6402	-36.6198
622	6	Incidence	44697	Derby	3	Both	27	Age-standardized	683	Periodontal diseases	3	Rate	1990	2021	-9.67736	40.2876	-38.4355
623	6	Incidence	44704	Solihull	3	Both	27	Age-standardized	683	Periodontal diseases	3	Rate	1990	2021	-10.385	39.2814	-38.2656
624	6	Incidence	44687	Sheffield	3	Both	27	Age-standardized	683	Periodontal diseases	3	Rate	1990	2021	-10.0078	38.8834	-38.8824
625	6	Incidence	44709	Coventry	3	Both	27	Age-standardized	683	Periodontal diseases	3	Rate	1990	2021	-11.5886	35.3828	-38.9819
626	6	Incidence	44651	Middlesbrough	3	Both	27	Age-standardized	683	Periodontal diseases	3	Rate	1990	2021	-7.89308	45.3811	-37.9604
627	6	Incidence	44721	Cambridgeshire	3	Both	27	Age-standardized	683	Periodontal diseases	3	Rate	1990	2021	-9.20074	39.348	-38.55
628	6	Incidence	44685	Kirklees	3	Both	27	Age-standardized	683	Periodontal diseases	3	Rate	1990	2021	-10.8151	37.0105	-39.3648
629	6	Incidence	44743	Hammersmith and Fulham	3	Both	27	Age-standardized	683	Periodontal diseases	3	Rate	1990	2021	-9.99706	35.0007	-36.7312
630	6	Incidence	44714	Birmingham	3	Both	27	Age-standardized	683	Periodontal diseases	3	Rate	1990	2021	-11.5334	36.2911	-38.8365
631	6	Incidence	44726	Luton	3	Both	27	Age-standardized	683	Periodontal diseases	3	Rate	1990	2021	-10.1809	38.7306	-39.117
632	6	Incidence	44673	Salford	3	Both	27	Age-standardized	683	Periodontal diseases	3	Rate	1990	2021	-9.01139	40.6736	-38.2947
633	6	Incidence	44689	Rotherham	3	Both	27	Age-standardized	683	Periodontal diseases	3	Rate	1990	2021	-8.53009	41.3302	-38.1274
634	6	Incidence	44590	Four World Regions	3	Both	27	Age-standardized	683	Periodontal diseases	3	Rate	1990	2021	0.0218157	19.2273	-13.1585
635	6	Incidence	44733	Redbridge	3	Both	27	Age-standardized	683	Periodontal diseases	3	Rate	1990	2021	-12.0004	36.4181	-39.7994
636	6	Incidence	44656	Stockport	3	Both	27	Age-standardized	683	Periodontal diseases	3	Rate	1990	2021	-10.0955	37.9707	-38.4852
637	6	Incidence	44772	East Sussex	3	Both	27	Age-standardized	683	Periodontal diseases	3	Rate	1990	2021	0.774928	4.01968	-3.11806
638	6	Incidence	44755	Haringey	3	Both	27	Age-standardized	683	Periodontal diseases	3	Rate	1990	2021	-0.455402	4.15966	-4.81218
639	6	Incidence	44750	Lewisham	3	Both	27	Age-standardized	683	Periodontal diseases	3	Rate	1990	2021	-8.76768	42.2913	-38.246
640	6	Incidence	44736	Hillingdon	3	Both	27	Age-standardized	683	Periodontal diseases	3	Rate	1990	2021	-12.4672	31.6796	-39.6283
641	6	Incidence	44668	Rochdale	3	Both	27	Age-standardized	683	Periodontal diseases	3	Rate	1990	2021	-10.9161	40.3724	-39.2594
642	6	Incidence	44699	Nottinghamshire	3	Both	27	Age-standardized	683	Periodontal diseases	3	Rate	1990	2021	-9.91102	37.143	-38.0698
643	6	Incidence	44777	Slough	3	Both	27	Age-standardized	683	Periodontal diseases	3	Rate	1990	2021	-12.5272	32.2974	-39.3423
644	6	Incidence	44765	Bracknell Forest	3	Both	27	Age-standardized	683	Periodontal diseases	3	Rate	1990	2021	3.59743	7.43488	0.086532
645	6	Incidence	44702	Warwickshire	3	Both	27	Age-standardized	683	Periodontal diseases	3	Rate	1990	2021	-10.3337	37.2448	-38.5119
646	6	Incidence	44731	Bromley	3	Both	27	Age-standardized	683	Periodontal diseases	3	Rate	1990	2021	-11.9715	35.8292	-39.3453
647	6	Incidence	44719	Hertfordshire	3	Both	27	Age-standardized	683	Periodontal diseases	3	Rate	1990	2021	-10.6052	34.8006	-37.8245
648	6	Incidence	44661	Cumbria	3	Both	27	Age-standardized	683	Periodontal diseases	3	Rate	1990	2021	-7.02489	42.1502	-36.635
649	6	Incidence	44707	Staffordshire	3	Both	27	Age-standardized	683	Periodontal diseases	3	Rate	1990	2021	-11.4265	38.5992	-39.7518
650	6	Incidence	44748	Camden	3	Both	27	Age-standardized	683	Periodontal diseases	3	Rate	1990	2021	-9.81273	32.468	-35.7577
651	6	Incidence	44717	Central Bedfordshire	3	Both	27	Age-standardized	683	Periodontal diseases	3	Rate	1990	2021	-10.5522	38.0304	-38.8048
652	6	Incidence	44775	Milton Keynes	3	Both	27	Age-standardized	683	Periodontal diseases	3	Rate	1990	2021	1.1248	29.9514	-15.2425
653	6	Incidence	44678	North Yorkshire	3	Both	27	Age-standardized	683	Periodontal diseases	3	Rate	1990	2021	-9.62479	38.2227	-37.9674
654	6	Incidence	44861	Addis Ababa	3	Both	27	Age-standardized	683	Periodontal diseases	3	Rate	1990	2021	-19.7207	0.904714	-35.1233
655	6	Incidence	44758	Tower Hamlets	3	Both	27	Age-standardized	683	Periodontal diseases	3	Rate	1990	2021	3.14014	7.59385	-1.28112
656	6	Incidence	44666	Warrington	3	Both	27	Age-standardized	683	Periodontal diseases	3	Rate	1990	2021	-8.83139	41.2759	-37.7184
657	6	Incidence	44741	Enfield	3	Both	27	Age-standardized	683	Periodontal diseases	3	Rate	1990	2021	-11.4888	34.1699	-38.4947
658	6	Incidence	44867	West Azarbayejan	3	Both	27	Age-standardized	683	Periodontal diseases	3	Rate	1990	2021	0.322966	3.6138	-2.91174
659	6	Incidence	44671	Liverpool	3	Both	27	Age-standardized	683	Periodontal diseases	3	Rate	1990	2021	-9.25601	40.2947	-38.0717
660	6	Incidence	44712	Walsall	3	Both	27	Age-standardized	683	Periodontal diseases	3	Rate	1990	2021	-12.0995	34.4406	-39.2847
661	6	Incidence	44724	Southend-on-Sea	3	Both	27	Age-standardized	683	Periodontal diseases	3	Rate	1990	2021	-11.0637	39.1849	-39.5903
662	6	Incidence	44695	Lincolnshire	3	Both	27	Age-standardized	683	Periodontal diseases	3	Rate	1990	2021	-10.4028	39.9778	-38.9379
663	6	Incidence	44753	Newham	3	Both	27	Age-standardized	683	Periodontal diseases	3	Rate	1990	2021	-11.266	34.3605	-38.7321
664	6	Incidence	44792	Plymouth	3	Both	27	Age-standardized	683	Periodontal diseases	3	Rate	1990	2021	-10.0935	40.3291	-37.9608
665	6	Incidence	44770	Brighton and Hove	3	Both	27	Age-standardized	683	Periodontal diseases	3	Rate	1990	2021	-8.31763	42.2059	-36.979
666	6	Incidence	44763	West Berkshire	3	Both	27	Age-standardized	683	Periodontal diseases	3	Rate	1990	2021	1.47944	6.1545	-3.05486
667	6	Incidence	44787	Swindon	3	Both	27	Age-standardized	683	Periodontal diseases	3	Rate	1990	2021	-3.24442	0.240461	-6.78461
668	6	Incidence	44746	Wandsworth	3	Both	27	Age-standardized	683	Periodontal diseases	3	Rate	1990	2021	-10.9444	34.6036	-39.2321
669	6	Incidence	44683	North Lincolnshire	3	Both	27	Age-standardized	683	Periodontal diseases	3	Rate	1990	2021	-14.0593	31.5238	-40.9928
670	6	Incidence	44859	Harari	3	Both	27	Age-standardized	683	Periodontal diseases	3	Rate	1990	2021	0.906047	3.93246	-1.59321
671	6	Incidence	44693	Northamptonshire	3	Both	27	Age-standardized	683	Periodontal diseases	3	Rate	1990	2021	-10.3084	37.7249	-37.5165
672	6	Incidence	44739	Sutton	3	Both	27	Age-standardized	683	Periodontal diseases	3	Rate	1990	2021	-9.48086	40.7744	-38.9333
673	6	Incidence	44729	Barnet	3	Both	27	Age-standardized	683	Periodontal diseases	3	Rate	1990	2021	-10.0627	37.5361	-37.4356
674	6	Incidence	44688	Wakefield	3	Both	27	Age-standardized	683	Periodontal diseases	3	Rate	1990	2021	-8.27162	41.4628	-37.771
675	6	Incidence	44698	Derbyshire	3	Both	27	Age-standardized	683	Periodontal diseases	3	Rate	1990	2021	-9.11537	38.9081	-38.3859
676	6	Incidence	44872	Golestan	3	Both	27	Age-standardized	683	Periodontal diseases	3	Rate	1990	2021	-1.22646	2.06065	-5.74467
677	6	Incidence	44782	Devon	3	Both	27	Age-standardized	683	Periodontal diseases	3	Rate	1990	2021	-7.96896	41.1991	-36.5964
678	6	Incidence	44854	Amhara	3	Both	27	Age-standardized	683	Periodontal diseases	3	Rate	1990	2021	2.2446	5.90581	-0.780804
679	6	Incidence	44710	Telford and Wrekin	3	Both	27	Age-standardized	683	Periodontal diseases	3	Rate	1990	2021	-12.8152	35.7955	-39.7147
680	6	Incidence	44727	Richmond upon Thames	3	Both	27	Age-standardized	683	Periodontal diseases	3	Rate	1990	2021	-9.45129	38.4744	-37.2879
681	6	Incidence	44705	Shropshire	3	Both	27	Age-standardized	683	Periodontal diseases	3	Rate	1990	2021	-10.747	39.6578	-39.2224
682	6	Incidence	44744	Ealing	3	Both	27	Age-standardized	683	Periodontal diseases	3	Rate	1990	2021	-12.1392	35.3951	-39.0973
683	6	Incidence	44760	Buckinghamshire	3	Both	27	Age-standardized	683	Periodontal diseases	3	Rate	1990	2021	-0.689692	3.10593	-4.29505
684	6	Incidence	44715	Sandwell	3	Both	27	Age-standardized	683	Periodontal diseases	3	Rate	1990	2021	-12.6541	31.5351	-39.3158
685	6	Incidence	44722	Thurrock	3	Both	27	Age-standardized	683	Periodontal diseases	3	Rate	1990	2021	-13.1968	33.2135	-41.3179
686	6	Incidence	44780	Wiltshire	3	Both	27	Age-standardized	683	Periodontal diseases	3	Rate	1990	2021	-0.870617	2.77339	-4.39849
687	6	Incidence	44734	Merton	3	Both	27	Age-standardized	683	Periodontal diseases	3	Rate	1990	2021	-8.93956	39.841	-37.7615
688	6	Incidence	44768	Reading	3	Both	27	Age-standardized	683	Periodontal diseases	3	Rate	1990	2021	2.50085	6.94669	-1.5698
689	6	Incidence	44865	Ardebil	3	Both	27	Age-standardized	683	Periodontal diseases	3	Rate	1990	2021	-2.03514	30.4266	-23.7004
690	6	Incidence	44870	Fars	3	Both	27	Age-standardized	683	Periodontal diseases	3	Rate	1990	2021	-1.00817	32.0923	-23.0879
691	6	Incidence	44773	Portsmouth	3	Both	27	Age-standardized	683	Periodontal diseases	3	Rate	1990	2021	0.993192	4.98253	-3.46069
692	6	Incidence	44785	Gloucestershire	3	Both	27	Age-standardized	683	Periodontal diseases	3	Rate	1990	2021	-9.08764	41.3087	-38.0186
693	6	Incidence	44790	Bournemouth	3	Both	27	Age-standardized	683	Periodontal diseases	3	Rate	1990	2021	1.93344	7.08685	-2.68774
694	6	Incidence	44852	Tigray	3	Both	27	Age-standardized	683	Periodontal diseases	3	Rate	1990	2021	1.93377	5.33951	-1.75842
695	6	Incidence	44737	Havering	3	Both	27	Age-standardized	683	Periodontal diseases	3	Rate	1990	2021	-10.4357	36.8332	-39.5533
696	6	Incidence	44703	Herefordshire, County of	3	Both	27	Age-standardized	683	Periodontal diseases	3	Rate	1990	2021	-10.0101	40.8	-38.3337
697	6	Incidence	44766	West Sussex	3	Both	27	Age-standardized	683	Periodontal diseases	3	Rate	1990	2021	0.443941	5.77791	-4.73161
698	6	Incidence	44778	South Gloucestershire	3	Both	27	Age-standardized	683	Periodontal diseases	3	Rate	1990	2021	2.9766	7.27689	-0.899325
699	6	Incidence	44751	Hounslow	3	Both	27	Age-standardized	683	Periodontal diseases	3	Rate	1990	2021	-11.2851	33.2658	-39.0707
700	6	Incidence	44675	Knowsley	3	Both	27	Age-standardized	683	Periodontal diseases	3	Rate	1990	2021	-5.30139	45.7552	-34.7996
701	6	Incidence	44894	Zanjan	3	Both	27	Age-standardized	683	Periodontal diseases	3	Rate	1990	2021	-6.13568	22.8544	-27.0982
702	6	Incidence	44887	Mazandaran	3	Both	27	Age-standardized	683	Periodontal diseases	3	Rate	1990	2021	-1.43666	2.13489	-4.67026
703	6	Incidence	44732	Bexley	3	Both	27	Age-standardized	683	Periodontal diseases	3	Rate	1990	2021	-9.90639	40.3664	-38.3631
704	6	Incidence	44882	Khuzestan	3	Both	27	Age-standardized	683	Periodontal diseases	3	Rate	1990	2021	1.27671	5.2229	-2.20148
705	6	Incidence	44756	Hackney	3	Both	27	Age-standardized	683	Periodontal diseases	3	Rate	1990	2021	4.89932	9.57364	0.983457
706	6	Incidence	44877	Kerman	3	Both	27	Age-standardized	683	Periodontal diseases	3	Rate	1990	2021	-5.06351	27.538	-26.9389
707	6	Incidence	44776	Southampton	3	Both	27	Age-standardized	683	Periodontal diseases	3	Rate	1990	2021	-1.61847	3.07814	-6.19236
708	6	Incidence	44862	Dire Dawa	3	Both	27	Age-standardized	683	Periodontal diseases	3	Rate	1990	2021	0.249663	3.54372	-2.17377
709	6	Incidence	44749	Lambeth	3	Both	27	Age-standardized	683	Periodontal diseases	3	Rate	1990	2021	-8.10219	40.618	-37.2648
710	6	Incidence	44680	York	3	Both	27	Age-standardized	683	Periodontal diseases	3	Rate	1990	2021	-11.2916	35.5355	-38.4492
711	6	Incidence	44892	Tehran	3	Both	27	Age-standardized	683	Periodontal diseases	3	Rate	1990	2021	-0.995035	1.52778	-3.84319
712	6	Incidence	44742	Croydon	3	Both	27	Age-standardized	683	Periodontal diseases	3	Rate	1990	2021	-12.2216	34.2809	-39.6137
713	6	Incidence	44771	Medway	3	Both	27	Age-standardized	683	Periodontal diseases	3	Rate	1990	2021	0.843133	5.66638	-3.497
714	6	Incidence	44754	Barking and Dagenham	3	Both	27	Age-standardized	683	Periodontal diseases	3	Rate	1990	2021	-11.6598	35.1732	-39.8814
715	6	Incidence	44720	Essex	3	Both	27	Age-standardized	683	Periodontal diseases	3	Rate	1990	2021	-9.19528	40.9151	-37.4051
716	6	Incidence	44747	Waltham Forest	3	Both	27	Age-standardized	683	Periodontal diseases	3	Rate	1990	2021	-10.2732	38.5809	-37.9108
717	6	Incidence	44857	Benishangul-Gumuz	3	Both	27	Age-standardized	683	Periodontal diseases	3	Rate	1990	2021	2.79802	7.00954	-0.758467
718	6	Incidence	44725	Peterborough	3	Both	27	Age-standardized	683	Periodontal diseases	3	Rate	1990	2021	-10.4076	35.6198	-38.7511
719	6	Incidence	44885	Lorestan	3	Both	27	Age-standardized	683	Periodontal diseases	3	Rate	1990	2021	2.41731	6.02911	-0.756222
720	6	Incidence	44788	Torbay	3	Both	27	Age-standardized	683	Periodontal diseases	3	Rate	1990	2021	-0.0148406	4.48536	-4.63388
721	6	Incidence	44759	Wokingham	3	Both	27	Age-standardized	683	Periodontal diseases	3	Rate	1990	2021	4.19807	8.10088	0.71852
722	6	Incidence	44764	Hampshire	3	Both	27	Age-standardized	683	Periodontal diseases	3	Rate	1990	2021	3.00606	7.17197	-1.57445
723	6	Incidence	44875	Ilam	3	Both	27	Age-standardized	683	Periodontal diseases	3	Rate	1990	2021	-1.8389	33.2858	-24.522
724	6	Incidence	44873	Hamadan	3	Both	27	Age-standardized	683	Periodontal diseases	3	Rate	1990	2021	1.74969	6.24767	-2.36647
725	6	Incidence	44880	Khorasan-e-Razavi	3	Both	27	Age-standardized	683	Periodontal diseases	3	Rate	1990	2021	3.12111	7.29163	-0.428733
726	6	Incidence	44855	Oromia	3	Both	27	Age-standardized	683	Periodontal diseases	3	Rate	1990	2021	2.45132	5.52149	-0.902976
727	6	Incidence	44868	Bushehr	3	Both	27	Age-standardized	683	Periodontal diseases	3	Rate	1990	2021	-2.4654	29.9755	-23.9547
728	6	Incidence	44860	Gambella	3	Both	27	Age-standardized	683	Periodontal diseases	3	Rate	1990	2021	2.68814	6.44568	-0.602761
729	6	Incidence	53620	Punjab	3	Both	27	Age-standardized	683	Periodontal diseases	3	Rate	1990	2021	-2.74714	19.2164	-20.408
730	6	Incidence	44700	Nottingham	3	Both	27	Age-standardized	683	Periodontal diseases	3	Rate	1990	2021	-12.0213	34.5883	-39.5044
731	6	Incidence	44783	Poole	3	Both	27	Age-standardized	683	Periodontal diseases	3	Rate	1990	2021	0.679348	5.28136	-3.41063
732	6	Incidence	44730	Westminster	3	Both	27	Age-standardized	683	Periodontal diseases	3	Rate	1990	2021	-10.4153	29.406	-34.5915
733	6	Incidence	44690	Doncaster	3	Both	27	Age-standardized	683	Periodontal diseases	3	Rate	1990	2021	-7.81666	44.4172	-37.1049
734	6	Incidence	53615	Azad Jammu & Kashmir	3	Both	27	Age-standardized	683	Periodontal diseases	3	Rate	1990	2021	-2.28695	18.9487	-19.107
735	6	Incidence	44774	Isle of Wight	3	Both	27	Age-standardized	683	Periodontal diseases	3	Rate	1990	2021	2.71207	7.55362	-1.31326
736	6	Incidence	44735	Brent	3	Both	27	Age-standardized	683	Periodontal diseases	3	Rate	1990	2021	-11.5676	37.5921	-39.3766
737	6	Incidence	94365	Central Africa	3	Both	27	Age-standardized	683	Periodontal diseases	3	Rate	1990	2021	-28.1082	-9.02488	-41.1725
738	6	Incidence	44871	Gilan	3	Both	27	Age-standardized	683	Periodontal diseases	3	Rate	1990	2021	1.68564	6.01461	-1.54739
739	6	Incidence	44769	Kent	3	Both	27	Age-standardized	683	Periodontal diseases	3	Rate	1990	2021	-1.50212	23.6207	-17.2844
740	6	Incidence	44791	Cornwall	3	Both	27	Age-standardized	683	Periodontal diseases	3	Rate	1990	2021	1.55456	5.64903	-2.64904
741	6	Incidence	53432	Tr酶ndelag	3	Both	27	Age-standardized	683	Periodontal diseases	3	Rate	1990	2021	-4.09697	18.9885	-22.1095
742	6	Incidence	60136	Viken	3	Both	27	Age-standardized	683	Periodontal diseases	3	Rate	1990	2021	-4.85517	17.8055	-22.0148
743	6	Incidence	44786	Somerset	3	Both	27	Age-standardized	683	Periodontal diseases	3	Rate	1990	2021	0.965187	5.65001	-3.58803
744	6	Incidence	44893	Yazd	3	Both	27	Age-standardized	683	Periodontal diseases	3	Rate	1990	2021	-1.52986	32.5552	-23.4171
745	6	Incidence	44878	Kermanshah	3	Both	27	Age-standardized	683	Periodontal diseases	3	Rate	1990	2021	2.15882	6.41307	-1.40072
746	6	Incidence	44853	Afar	3	Both	27	Age-standardized	683	Periodontal diseases	3	Rate	1990	2021	2.10301	6.78384	-0.755442
747	6	Incidence	44767	Oxfordshire	3	Both	27	Age-standardized	683	Periodontal diseases	3	Rate	1990	2021	2.16823	6.60614	-1.6294
748	6	Incidence	53618	Islamabad Capital Territory	3	Both	27	Age-standardized	683	Periodontal diseases	3	Rate	1990	2021	0.56179	3.48088	-2.27504
749	6	Incidence	44866	East Azarbayejan	3	Both	27	Age-standardized	683	Periodontal diseases	3	Rate	1990	2021	-0.844233	2.24166	-4.78727
750	6	Incidence	44752	Southwark	3	Both	27	Age-standardized	683	Periodontal diseases	3	Rate	1990	2021	-9.77451	34.483	-36.5579
751	6	Incidence	95467	Advanced Health System	3	Both	27	Age-standardized	683	Periodontal diseases	3	Rate	1990	2021	-0.830498	27.1105	-19.9545
752	6	Incidence	95469	Limited Health System	3	Both	27	Age-standardized	683	Periodontal diseases	3	Rate	1990	2021	-6.62949	12.0211	-19.2708
753	6	Incidence	44781	North Somerset	3	Both	27	Age-standardized	683	Periodontal diseases	3	Rate	1990	2021	-6.87214	42.6612	-35.1396
754	6	Incidence	44883	Kohgiluyeh and Boyer-Ahmad	3	Both	27	Age-standardized	683	Periodontal diseases	3	Rate	1990	2021	-0.79754	32.662	-22.9125
755	6	Incidence	44888	Qazvin	3	Both	27	Age-standardized	683	Periodontal diseases	3	Rate	1990	2021	0.352137	36.4529	-22.0364
756	6	Incidence	44864	Alborz	3	Both	27	Age-standardized	683	Periodontal diseases	3	Rate	1990	2021	-0.675796	2.22333	-3.53342
757	6	Incidence	44779	Dorset	3	Both	27	Age-standardized	683	Periodontal diseases	3	Rate	1990	2021	-10.163	38.6945	-38.3007
758	6	Incidence	94216	Association of Southeast Asian Nations	3	Both	27	Age-standardized	683	Periodontal diseases	3	Rate	1990	2021	-6.44558	6.96246	-15.4426
759	6	Incidence	44876	Isfahan	3	Both	27	Age-standardized	683	Periodontal diseases	3	Rate	1990	2021	0.388378	3.39337	-3.32898
760	6	Incidence	44757	Islington	3	Both	27	Age-standardized	683	Periodontal diseases	3	Rate	1990	2021	2.15798	6.73889	-2.22771
761	6	Incidence	44789	Bristol, City of	3	Both	27	Age-standardized	683	Periodontal diseases	3	Rate	1990	2021	1.34503	5.07122	-3.85222
762	6	Incidence	44890	Semnan	3	Both	27	Age-standardized	683	Periodontal diseases	3	Rate	1990	2021	1.07322	4.77842	-2.25752
763	6	Incidence	95081	Brazil South	3	Both	27	Age-standardized	683	Periodontal diseases	3	Rate	1990	2021	4.19317	21.1805	-7.88456
764	6	Incidence	95471	Health System Grouping Levels	3	Both	27	Age-standardized	683	Periodontal diseases	3	Rate	1990	2021	0.00975532	19.2089	-13.1668
765	6	Incidence	44858	Southern Nations, Nationalities, and Peoples	3	Both	27	Age-standardized	683	Periodontal diseases	3	Rate	1990	2021	1.80686	4.88207	-1.78262
766	6	Incidence	60134	Vestfold og Telemark	3	Both	27	Age-standardized	683	Periodontal diseases	3	Rate	1990	2021	-4.70815	19.0075	-22.6995
767	6	Incidence	95468	Basic Health System	3	Both	27	Age-standardized	683	Periodontal diseases	3	Rate	1990	2021	-1.33777	14.7017	-12.0172
768	6	Incidence	44856	Somali	3	Both	27	Age-standardized	683	Periodontal diseases	3	Rate	1990	2021	1.9513	5.2963	-1.30563
769	6	Incidence	44874	Hormozgan	3	Both	27	Age-standardized	683	Periodontal diseases	3	Rate	1990	2021	-2.49208	30.694	-23.8387
770	6	Incidence	44761	Surrey	3	Both	27	Age-standardized	683	Periodontal diseases	3	Rate	1990	2021	1.39425	5.73564	-2.5515
771	6	Incidence	95082	Brazil Southeast	3	Both	27	Age-standardized	683	Periodontal diseases	3	Rate	1990	2021	8.17556	25.2776	-3.26487
772	6	Incidence	95470	Minimal Health System	3	Both	27	Age-standardized	683	Periodontal diseases	3	Rate	1990	2021	-26.6114	-6.77173	-39.9631
773	6	Incidence	44881	South Khorasan	3	Both	27	Age-standardized	683	Periodontal diseases	3	Rate	1990	2021	3.80373	9.58134	0.316023
774	6	Incidence	44886	Markazi	3	Both	27	Age-standardized	683	Periodontal diseases	3	Rate	1990	2021	2.07012	5.58807	-1.82421
775	6	Incidence	53621	Sindh	3	Both	27	Age-standardized	683	Periodontal diseases	3	Rate	1990	2021	-2.25996	11.7271	-14.1142
776	6	Incidence	60132	Vestland	3	Both	27	Age-standardized	683	Periodontal diseases	3	Rate	1990	2021	-4.43688	18.9003	-21.9996
777	6	Incidence	44869	Chahar Mahaal and Bakhtiari	3	Both	27	Age-standardized	683	Periodontal diseases	3	Rate	1990	2021	3.67404	8.60024	-0.314248
778	6	Incidence	44784	Bath and North East Somerset	3	Both	27	Age-standardized	683	Periodontal diseases	3	Rate	1990	2021	3.08033	8.43632	-0.821625
779	6	Incidence	44879	North Khorasan	3	Both	27	Age-standardized	683	Periodontal diseases	3	Rate	1990	2021	-0.827112	37.2098	-23.819
780	6	Incidence	60137	Troms og Finnmark	3	Both	27	Age-standardized	683	Periodontal diseases	3	Rate	1990	2021	-1.92119	13.4244	-16.2434
781	6	Incidence	53616	Balochistan	3	Both	27	Age-standardized	683	Periodontal diseases	3	Rate	1990	2021	-2.96512	19.6181	-21.4187
782	6	Incidence	94366	Sahel Region	3	Both	27	Age-standardized	683	Periodontal diseases	3	Rate	1990	2021	-31.7548	-21.6152	-39.3146
783	6	Incidence	44884	Kurdistan	3	Both	27	Age-standardized	683	Periodontal diseases	3	Rate	1990	2021	-0.981614	33.2556	-24.1254
784	6	Incidence	53619	Khyber Pakhtunkhwa	3	Both	27	Age-standardized	683	Periodontal diseases	3	Rate	1990	2021	-2.00974	20.1169	-19.1881
785	6	Incidence	44889	Qom	3	Both	27	Age-standardized	683	Periodontal diseases	3	Rate	1990	2021	1.53514	4.85265	-1.30698
786	6	Incidence	95079	Brazil Northeast	3	Both	27	Age-standardized	683	Periodontal diseases	3	Rate	1990	2021	11.2311	16.85	5.41981
787	6	Incidence	94217	Gulf Cooperation Council	3	Both	27	Age-standardized	683	Periodontal diseases	3	Rate	1990	2021	10.8376	46.4574	-12.2348
788	6	Incidence	60135	Innlandet	3	Both	27	Age-standardized	683	Periodontal diseases	3	Rate	1990	2021	-4.21362	22.7539	-22.4552
789	6	Incidence	53617	Gilgit-Baltistan	3	Both	27	Age-standardized	683	Periodontal diseases	3	Rate	1990	2021	1.71955	6.42615	-1.32477
790	6	Incidence	95078	Brazil North	3	Both	27	Age-standardized	683	Periodontal diseases	3	Rate	1990	2021	8.07134	17.8266	1.5512
791	6	Incidence	60133	Agder	3	Both	27	Age-standardized	683	Periodontal diseases	3	Rate	1990	2021	-4.48486	19.3275	-22.463
792	6	Incidence	44762	Windsor and Maidenhead	3	Both	27	Age-standardized	683	Periodontal diseases	3	Rate	1990	2021	2.3282	6.93871	-1.79275
793	6	Incidence	94215	Organization of Islamic Cooperation	3	Both	27	Age-standardized	683	Periodontal diseases	3	Rate	1990	2021	-4.95684	12.9735	-18.1855
794	6	Incidence	44891	Sistan and Baluchistan	3	Both	27	Age-standardized	683	Periodontal diseases	3	Rate	1990	2021	-0.0491507	3.33379	-2.91351
795	6	Incidence	95080	Brazil Central-West	3	Both	27	Age-standardized	683	Periodontal diseases	3	Rate	1990	2021	11.8546	17.4413	6.56414
