# Supplementary material for: Global, Regional, and National Levels and Trends in Burden of Dental Caries and Periodontal Disease from 1990 to 2035：Result From the Global Burden of Disease Study 2021
Source: Research Square preprint supplement (doi:10.21203/rs.3.rs-5609270/v1), 2025-04-02
Supplement: Supplementary file 16 [file 884e890d5afae81412e96747.xlsx]

## Sheet: Sheet1
Exported data
	val	sd	Time	group	low_50	up_50	low_60	up_60	low_70	up_70	low_80	up_80	low_95	up_95
1	28108.9	1.26659	1990	ASR	28108.1	28109.8	28107.8	28110	28107.6	28110.2	28107.3	28110.5	28106.4	28111.4
2	28052.4	1.25913	1991	ASR	28051.5	28053.2	28051.3	28053.4	28051.1	28053.7	28050.8	28054	28049.9	28054.9
3	28006.7	1.25298	1992	ASR	28005.8	28007.5	28005.6	28007.7	28005.4	28008	28005	28008.3	28004.2	28009.1
4	27949.7	1.24799	1993	ASR	27948.9	27950.6	27948.7	27950.8	27948.4	27951	27948.1	27951.3	27947.3	27952.2
5	27881.2	1.24443	1994	ASR	27880.4	27882.1	27880.2	27882.3	27879.9	27882.5	27879.6	27882.8	27878.8	27883.7
6	27817.5	1.24242	1995	ASR	27816.7	27818.4	27816.5	27818.6	27816.2	27818.8	27815.9	27819.1	27815.1	27820
7	27758	1.24138	1996	ASR	27757.2	27758.9	27757	27759.1	27756.8	27759.3	27756.5	27759.6	27755.6	27760.5
8	27695.3	1.24091	1997	ASR	27694.4	27696.1	27694.2	27696.3	27694	27696.5	27693.7	27696.8	27692.8	27697.7
9	27632.3	1.24104	1998	ASR	27631.4	27633.1	27631.2	27633.3	27631	27633.6	27630.7	27633.9	27629.9	27634.7
10	27569.9	1.24154	1999	ASR	27569	27570.7	27568.8	27570.9	27568.6	27571.2	27568.3	27571.5	27567.4	27572.3
11	27509.5	1.24202	2000	ASR	27508.7	27510.3	27508.5	27510.5	27508.2	27510.8	27507.9	27511.1	27507.1	27511.9
12	27418.9	1.24101	2001	ASR	27418	27419.7	27417.8	27419.9	27417.6	27420.2	27417.3	27420.5	27416.4	27421.3
13	27285.1	1.23809	2002	ASR	27284.3	27285.9	27284.1	27286.2	27283.8	27286.4	27283.5	27286.7	27282.7	27287.5
14	27139.5	1.23411	2003	ASR	27138.7	27140.3	27138.5	27140.5	27138.2	27140.8	27137.9	27141.1	27137.1	27141.9
15	27010.4	1.22988	2004	ASR	27009.6	27011.2	27009.4	27011.4	27009.1	27011.7	27008.8	27012	27008	27012.8
16	26923	1.22591	2005	ASR	26922.2	26923.8	26922	26924	26921.7	26924.3	26921.4	26924.6	26920.6	26925.4
17	26832.5	1.221	2006	ASR	26831.7	26833.3	26831.5	26833.5	26831.2	26833.8	26830.9	26834.1	26830.1	26834.9
18	26698.8	1.21427	2007	ASR	26698	26699.6	26697.8	26699.8	26697.6	26700.1	26697.3	26700.4	26696.4	26701.2
19	26561.6	1.20663	2008	ASR	26560.7	26562.4	26560.5	26562.6	26560.3	26562.8	26560	26563.1	26559.2	26563.9
20	26458.1	1.19913	2009	ASR	26457.3	26458.9	26457.1	26459.1	26456.8	26459.3	26456.5	26459.6	26455.7	26460.4
21	26421	1.19318	2010	ASR	26420.2	26421.8	26420	26422	26419.8	26422.3	26419.5	26422.6	26418.7	26423.4
22	26429	1.18834	2011	ASR	26428.2	26429.8	26428	26430	26427.8	26430.2	26427.5	26430.5	26426.7	26431.3
23	26415	1.18258	2012	ASR	26414.2	26415.8	26414	26416	26413.7	26416.2	26413.5	26416.5	26412.6	26417.3
24	26377.3	1.17594	2013	ASR	26376.5	26378.1	26376.3	26378.3	26376.1	26378.5	26375.8	26378.8	26375	26379.6
25	26353.2	1.16973	2014	ASR	26352.4	26354	26352.2	26354.2	26352	26354.4	26351.7	26354.7	26350.9	26355.5
26	26344.6	1.16414	2015	ASR	26343.8	26345.4	26343.6	26345.6	26343.4	26345.8	26343.1	26346.1	26342.3	26346.9
27	26352	1.15942	2016	ASR	26351.2	26352.7	26351	26352.9	26350.8	26353.2	26350.5	26353.5	26349.7	26354.2
28	26397.8	1.15657	2017	ASR	26397	26398.5	26396.8	26398.7	26396.6	26399	26396.3	26399.3	26395.5	26400
29	26484.6	1.15603	2018	ASR	26483.8	26485.4	26483.6	26485.6	26483.4	26485.8	26483.1	26486.1	26482.4	26486.9
30	26586.8	1.15738	2019	ASR	26586	26587.6	26585.9	26587.8	26585.6	26588	26585.3	26588.3	26584.6	26589.1
31	26796.7	1.16255	2020	ASR	26795.9	26797.5	26795.7	26797.7	26795.5	26797.9	26795.2	26798.2	26794.4	26799
32	26501	1.15803	2021	ASR	26500.3	26501.8	26500.1	26502	26499.8	26502.2	26499.6	26502.5	26498.8	26503.3
33	26493.7	557.94	2022	ASR	26117.6	26869.7	26024.5	26962.9	25915.7	27071.7	25778.4	27209	25400.1	27587.3
34	26697	655.965	2023	ASR	26254.9	27139.1	26145.3	27248.7	26017.4	27376.6	25856.1	27538	25411.3	27982.7
35	26910.6	772.559	2024	ASR	26389.9	27431.3	26260.9	27560.3	26110.2	27711	25920.2	27901	25396.4	28424.8
36	27130.9	913.361	2025	ASR	26515.3	27746.5	26362.8	27899.1	26184.7	28077.2	25960	28301.9	25340.7	28921.1
37	27352.6	1083.39	2026	ASR	26622.4	28082.8	26441.5	28263.7	26230.2	28475	25963.7	28741.5	25229.1	29476
38	27575.8	1285.5	2027	ASR	26709.3	28442.2	26494.6	28656.9	26244	28907.5	25927.7	29223.8	25056.2	30095.3
39	27801.6	1517.7	2028	ASR	26778.7	28824.5	26525.2	29078	26229.2	29373.9	25855.9	29747.3	24826.9	30776.3
40	28030.3	1778.31	2029	ASR	26831.8	29228.9	26534.8	29525.9	26188	29872.7	25750.6	30310.1	24544.9	31515.8
41	28261.7	2066.1	2030	ASR	26869.2	29654.3	26524.1	29999.3	26121.2	30402.2	25613	30910.5	24212.2	32311.3
42	28495.1	2380.13	2031	ASR	26890.8	30099.3	26493.4	30496.7	26029.2	30960.9	25443.7	31546.4	23830	33160.1
43	28730.3	2719.6	2032	ASR	26897.3	30563.3	26443.1	31017.5	25912.8	31547.8	25243.8	32216.8	23399.9	34060.7
44	28967.5	3083.46	2033	ASR	26889.3	31045.8	26374.3	31560.7	25773	32162	25014.5	32920.5	22923.9	35011.1
45	29206.7	3470.93	2034	ASR	26867.2	31546.1	26287.6	32125.7	25610.8	32802.5	24756.9	33656.4	22403.6	36009.7
46	29447.8	3881.43	2035	ASR	26831.7	32063.9	26183.5	32712.1	25426.6	33468.9	24471.8	34423.8	21840.2	37055.4
