# Supplementary material for: Global, Regional, and National Levels and Trends in Burden of Dental Caries and Periodontal Disease from 1990 to 2035：Result From the Global Burden of Disease Study 2021
Source: Research Square preprint supplement (doi:10.21203/rs.3.rs-5609270/v1), 2025-04-02
Supplement: Supplementary file 17 [file 8ca7a928072c4a4093540796.xlsx]

## Sheet: Sheet1
Exported data
	measure_name	location_name	sex_name	age_name	cause_name	metric_name	year	val	upper	lower
1	Incidence	Global	Male	5-9 years	Caries of deciduous teeth	Number	2021	4.14186e+08	5.14831e+08	3.04636e+08
2	Incidence	Global	Female	5-9 years	Caries of deciduous teeth	Number	2021	3.85175e+08	4.77945e+08	2.82293e+08
3	Incidence	Global	Male	5-9 years	Caries of deciduous teeth	Percent	2021	0.201571	0.254939	0.152148
4	Incidence	Global	Female	5-9 years	Caries of deciduous teeth	Percent	2021	0.197903	0.250185	0.149461
5	Incidence	Global	Male	5-9 years	Caries of deciduous teeth	Rate	2021	116844	145237	85939.6
6	Incidence	Global	Female	5-9 years	Caries of deciduous teeth	Rate	2021	115815	143710	84880.3
7	Incidence	Global	Male	10-14 years	Caries of deciduous teeth	Number	2021	8.97791e+07	2.47215e+08	1.96561e+07
8	Incidence	Global	Female	10-14 years	Caries of deciduous teeth	Number	2021	7.84688e+07	2.15939e+08	1.72572e+07
9	Incidence	Global	Male	10-14 years	Caries of deciduous teeth	Percent	2021	0.0533113	0.134491	0.0121865
10	Incidence	Global	Female	10-14 years	Caries of deciduous teeth	Percent	2021	0.0475399	0.121336	0.011054
11	Incidence	Global	Male	10-14 years	Caries of deciduous teeth	Rate	2021	26120.6	71925.6	5718.8
12	Incidence	Global	Female	10-14 years	Caries of deciduous teeth	Rate	2021	24299.3	66869.5	5344.02
13	Incidence	Global	Male	2-4 years	Caries of deciduous teeth	Number	2021	1.30351e+08	1.66971e+08	9.31751e+07
14	Incidence	Global	Female	2-4 years	Caries of deciduous teeth	Number	2021	1.2294e+08	1.57997e+08	8.82206e+07
15	Incidence	Global	Male	2-4 years	Caries of deciduous teeth	Percent	2021	0.109197	0.142603	0.0790669
16	Incidence	Global	Female	2-4 years	Caries of deciduous teeth	Percent	2021	0.109731	0.14257	0.0786444
17	Incidence	Global	Male	2-4 years	Caries of deciduous teeth	Rate	2021	62606.3	80194.8	44751.2
18	Incidence	Global	Female	2-4 years	Caries of deciduous teeth	Rate	2021	63091.5	81082.5	45273.9
