# Supplementary material for: Global, Regional, and National Levels and Trends in Burden of Dental Caries and Periodontal Disease from 1990 to 2035：Result From the Global Burden of Disease Study 2021
Source: Research Square preprint supplement (doi:10.21203/rs.3.rs-5609270/v1), 2025-04-02
Supplement: Supplementary file 18 [file 94c9581d032e32b12f91f296.xlsx]

## Sheet: Sheet1
Exported data
	measure_id	measure_name	location_id	location_name	sex_id	sex_name	age_id	age_name	cause_id	cause_name	metric_id	metric_name	year_start	year_end	val	upper	lower
1	6	Incidence	27	Independent State of Samoa	3	Both	27	Age-standardized	682	Caries of permanent teeth	3	Rate	1990	2021	0.0716515	7.34503	-5.59934
2	6	Incidence	5	East Asia	3	Both	27	Age-standardized	682	Caries of permanent teeth	3	Rate	1990	2021	31.1994	44.8742	22.3078
3	6	Incidence	64	High-income	3	Both	27	Age-standardized	682	Caries of permanent teeth	3	Rate	1990	2021	-2.27602	0.0402412	-4.27202
4	6	Incidence	69	Republic of Singapore	3	Both	27	Age-standardized	682	Caries of permanent teeth	3	Rate	1990	2021	-0.992557	7.76673	-11.3985
5	6	Incidence	1	Global	3	Both	27	Age-standardized	682	Caries of permanent teeth	3	Rate	1990	2021	5.99984	7.84927	4.30836
6	6	Incidence	37	Kyrgyz Republic	3	Both	27	Age-standardized	682	Caries of permanent teeth	3	Rate	1990	2021	0.722977	7.08203	-4.61581
7	6	Incidence	59	Republic of Latvia	3	Both	27	Age-standardized	682	Caries of permanent teeth	3	Rate	1990	2021	0.520738	6.61393	-5.86524
8	6	Incidence	10	Kingdom of Cambodia	3	Both	27	Age-standardized	682	Caries of permanent teeth	3	Rate	1990	2021	3.64179	8.59333	-2.54426
9	6	Incidence	42	Central Europe	3	Both	27	Age-standardized	682	Caries of permanent teeth	3	Rate	1990	2021	4.47143	7.53199	1.39181
10	6	Incidence	74	Principality of Andorra	3	Both	27	Age-standardized	682	Caries of permanent teeth	3	Rate	1990	2021	1.31259	7.68379	-4.49425
11	6	Incidence	20	Socialist Republic of Viet Nam	3	Both	27	Age-standardized	682	Caries of permanent teeth	3	Rate	1990	2021	0.334866	8.81776	-10.418
12	6	Incidence	91	Portuguese Republic	3	Both	27	Age-standardized	682	Caries of permanent teeth	3	Rate	1990	2021	3.50213	12.3449	-5.09054
13	6	Incidence	96	Southern Latin America	3	Both	27	Age-standardized	682	Caries of permanent teeth	3	Rate	1990	2021	-0.115896	7.42398	-5.71965
14	6	Incidence	30	Republic of Vanuatu	3	Both	27	Age-standardized	682	Caries of permanent teeth	3	Rate	1990	2021	0.646793	6.74954	-4.57093
15	6	Incidence	32	Central Asia	3	Both	27	Age-standardized	682	Caries of permanent teeth	3	Rate	1990	2021	1.61138	4.70551	-1.01271
16	6	Incidence	52	Romania	3	Both	27	Age-standardized	682	Caries of permanent teeth	3	Rate	1990	2021	8.33155	16.8225	-0.617568
17	6	Incidence	133	Bolivarian Republic of Venezuela	3	Both	27	Age-standardized	682	Caries of permanent teeth	3	Rate	1990	2021	1.24518	6.40453	-3.61421
18	6	Incidence	57	Republic of Belarus	3	Both	27	Age-standardized	682	Caries of permanent teeth	3	Rate	1990	2021	0.393363	5.98855	-5.39469
19	6	Incidence	15	Republic of the Union of Myanmar	3	Both	27	Age-standardized	682	Caries of permanent teeth	3	Rate	1990	2021	-2.10904	6.17505	-11.1141
20	6	Incidence	155	Turkey	3	Both	27	Age-standardized	682	Caries of permanent teeth	3	Rate	1990	2021	2.01052	8.06605	-3.9278
21	6	Incidence	8	Taiwan (Province of China)	3	Both	27	Age-standardized	682	Caries of permanent teeth	3	Rate	1990	2021	-1.59812	9.526	-10.8049
22	6	Incidence	138	North Africa and Middle East	3	Both	27	Age-standardized	682	Caries of permanent teeth	3	Rate	1990	2021	1.03741	3.2807	-1.27897
23	6	Incidence	101	Canada	3	Both	27	Age-standardized	682	Caries of permanent teeth	3	Rate	1990	2021	-2.41778	7.83592	-10.611
24	6	Incidence	47	Czech Republic	3	Both	27	Age-standardized	682	Caries of permanent teeth	3	Rate	1990	2021	4.21949	11.3567	-2.90067
25	6	Incidence	45	Republic of Bulgaria	3	Both	27	Age-standardized	682	Caries of permanent teeth	3	Rate	1990	2021	0.788817	8.24959	-7.59252
26	6	Incidence	62	Russian Federation	3	Both	27	Age-standardized	682	Caries of permanent teeth	3	Rate	1990	2021	-0.786452	1.01295	-2.79463
27	6	Incidence	25	Federated States of Micronesia	3	Both	27	Age-standardized	682	Caries of permanent teeth	3	Rate	1990	2021	0.000499096	6.17541	-6.43195
28	6	Incidence	198	Zimbabwe	3	Both	27	Age-standardized	682	Caries of permanent teeth	3	Rate	1990	2021	-1.21693	6.52139	-10.0184
29	6	Incidence	67	Japan	3	Both	27	Age-standardized	682	Caries of permanent teeth	3	Rate	1990	2021	-17.2612	-13.0143	-21.5062
30	6	Incidence	72	New Zealand	3	Both	27	Age-standardized	682	Caries of permanent teeth	3	Rate	1990	2021	4.49628	11.4041	-2.20594
31	6	Incidence	123	Republic of Peru	3	Both	27	Age-standardized	682	Caries of permanent teeth	3	Rate	1990	2021	1.4057	7.97942	-4.00933
32	6	Incidence	79	Republic of Finland	3	Both	27	Age-standardized	682	Caries of permanent teeth	3	Rate	1990	2021	2.21274	11.3303	-6.82017
33	6	Incidence	193	Botswana	3	Both	27	Age-standardized	682	Caries of permanent teeth	3	Rate	1990	2021	-0.70399	9.32308	-7.94255
34	6	Incidence	128	Republic of Guatemala	3	Both	27	Age-standardized	682	Caries of permanent teeth	3	Rate	1990	2021	1.41473	7.50868	-4.84474
35	6	Incidence	89	Kingdom of the Netherlands	3	Both	27	Age-standardized	682	Caries of permanent teeth	3	Rate	1990	2021	-8.55637	3.65376	-19.7149
36	6	Incidence	106	Commonwealth of the Bahamas	3	Both	27	Age-standardized	682	Caries of permanent teeth	3	Rate	1990	2021	-0.687838	5.64422	-6.94367
37	6	Incidence	104	Caribbean	3	Both	27	Age-standardized	682	Caries of permanent teeth	3	Rate	1990	2021	1.45537	7.83492	-3.61859
38	6	Incidence	170	Congo	3	Both	27	Age-standardized	682	Caries of permanent teeth	3	Rate	1990	2021	0.332172	5.86281	-5.10006
39	6	Incidence	158	South Asia	3	Both	27	Age-standardized	682	Caries of permanent teeth	3	Rate	1990	2021	1.67797	4.07137	-0.754784
40	6	Incidence	99	Eastern Republic of Uruguay	3	Both	27	Age-standardized	682	Caries of permanent teeth	3	Rate	1990	2021	1.38117	7.12992	-4.23515
41	6	Incidence	116	Saint Lucia	3	Both	27	Age-standardized	682	Caries of permanent teeth	3	Rate	1990	2021	1.18909	7.91822	-3.7844
42	6	Incidence	84	Ireland	3	Both	27	Age-standardized	682	Caries of permanent teeth	3	Rate	1990	2021	2.29234	10.9445	-4.7166
43	6	Incidence	18	Kingdom of Thailand	3	Both	27	Age-standardized	682	Caries of permanent teeth	3	Rate	1990	2021	2.95979	12.6727	-4.93391
44	6	Incidence	187	Somalia	3	Both	27	Age-standardized	682	Caries of permanent teeth	3	Rate	1990	2021	-0.85513	5.01906	-6.56264
45	6	Incidence	94	Swiss Confederation	3	Both	27	Age-standardized	682	Caries of permanent teeth	3	Rate	1990	2021	4.71465	11.6686	-1.53867
46	6	Incidence	35	Georgia	3	Both	27	Age-standardized	682	Caries of permanent teeth	3	Rate	1990	2021	1.69815	8.57021	-4.71223
47	6	Incidence	13	Malaysia	3	Both	27	Age-standardized	682	Caries of permanent teeth	3	Rate	1990	2021	0.428871	7.50818	-7.17224
48	6	Incidence	131	Republic of Nicaragua	3	Both	27	Age-standardized	682	Caries of permanent teeth	3	Rate	1990	2021	2.24131	8.90989	-3.13816
49	6	Incidence	40	Turkmenistan	3	Both	27	Age-standardized	682	Caries of permanent teeth	3	Rate	1990	2021	3.75382	10.6271	-3.92212
50	6	Incidence	55	Republic of Slovenia	3	Both	27	Age-standardized	682	Caries of permanent teeth	3	Rate	1990	2021	-0.414636	8.14476	-8.7717
51	6	Incidence	165	Pakistan	3	Both	27	Age-standardized	682	Caries of permanent teeth	3	Rate	1990	2021	-1.71789	2.9572	-6.61842
52	6	Incidence	28	Solomon Islands	3	Both	27	Age-standardized	682	Caries of permanent teeth	3	Rate	1990	2021	-0.182848	5.62602	-6.98363
53	6	Incidence	23	Republic of Kiribati	3	Both	27	Age-standardized	682	Caries of permanent teeth	3	Rate	1990	2021	1.27219	8.36668	-4.40464
54	6	Incidence	148	Morocco	3	Both	27	Age-standardized	682	Caries of permanent teeth	3	Rate	1990	2021	-1.38668	4.89931	-8.95732
55	6	Incidence	160	Afghanistan	3	Both	27	Age-standardized	682	Caries of permanent teeth	3	Rate	1990	2021	3.02533	8.40464	-2.53409
56	6	Incidence	126	Republic of Costa Rica	3	Both	27	Age-standardized	682	Caries of permanent teeth	3	Rate	1990	2021	2.6481	9.64396	-2.29552
57	6	Incidence	60	Republic of Lithuania	3	Both	27	Age-standardized	682	Caries of permanent teeth	3	Rate	1990	2021	2.24481	10.3067	-6.22134
58	6	Incidence	121	Plurinational State of Bolivia	3	Both	27	Age-standardized	682	Caries of permanent teeth	3	Rate	1990	2021	1.10484	7.51907	-4.52443
59	6	Incidence	6	People's Republic of China	3	Both	27	Age-standardized	682	Caries of permanent teeth	3	Rate	1990	2021	32.0657	46.1089	22.97
60	6	Incidence	11	Republic of Indonesia	3	Both	27	Age-standardized	682	Caries of permanent teeth	3	Rate	1990	2021	0.558194	3.50644	-1.75356
61	6	Incidence	77	Republic of Cyprus	3	Both	27	Age-standardized	682	Caries of permanent teeth	3	Rate	1990	2021	2.61434	8.23639	-2.24518
62	6	Incidence	111	Dominican Republic	3	Both	27	Age-standardized	682	Caries of permanent teeth	3	Rate	1990	2021	1.73482	8.00869	-4.61752
63	6	Incidence	191	Zambia	3	Both	27	Age-standardized	682	Caries of permanent teeth	3	Rate	1990	2021	1.22961	8.67036	-6.36328
64	6	Incidence	70	Australasia	3	Both	27	Age-standardized	682	Caries of permanent teeth	3	Rate	1990	2021	12.4048	25.1095	1.88087
65	6	Incidence	240	Europe & Central Asia - WB	3	Both	27	Age-standardized	682	Caries of permanent teeth	3	Rate	1990	2021	0.578787	2.40665	-1.41144
66	6	Incidence	153	Syrian Arab Republic	3	Both	27	Age-standardized	682	Caries of permanent teeth	3	Rate	1990	2021	0.936224	6.16583	-4.60212
67	6	Incidence	50	Montenegro	3	Both	27	Age-standardized	682	Caries of permanent teeth	3	Rate	1990	2021	4.74685	12.9564	-3.49875
68	6	Incidence	163	India	3	Both	27	Age-standardized	682	Caries of permanent teeth	3	Rate	1990	2021	2.06582	4.71789	-0.221669
69	6	Incidence	143	Republic of Iraq	3	Both	27	Age-standardized	682	Caries of permanent teeth	3	Rate	1990	2021	2.54117	10.89	-3.88461
70	6	Incidence	65	High-income Asia Pacific	3	Both	27	Age-standardized	682	Caries of permanent teeth	3	Rate	1990	2021	-9.66331	-6.03325	-12.8185
71	6	Incidence	203	Cabo Verde	3	Both	27	Age-standardized	682	Caries of permanent teeth	3	Rate	1990	2021	-0.13267	6.14492	-7.61229
72	6	Incidence	38	Mongolia	3	Both	27	Age-standardized	682	Caries of permanent teeth	3	Rate	1990	2021	2.55425	12.7013	-4.04952
73	6	Incidence	43	Republic of Albania	3	Both	27	Age-standardized	682	Caries of permanent teeth	3	Rate	1990	2021	4.57628	11.3993	-3.07757
74	6	Incidence	175	Burundi	3	Both	27	Age-standardized	682	Caries of permanent teeth	3	Rate	1990	2021	0.806545	10.022	-6.22393
75	6	Incidence	82	Hellenic Republic	3	Both	27	Age-standardized	682	Caries of permanent teeth	3	Rate	1990	2021	5.41711	18.8543	-5.07288
76	6	Incidence	185	Rwanda	3	Both	27	Age-standardized	682	Caries of permanent teeth	3	Rate	1990	2021	0.00605623	6.70403	-6.63228
77	6	Incidence	196	South Africa	3	Both	27	Age-standardized	682	Caries of permanent teeth	3	Rate	1990	2021	5.23907	9.32203	1.43613
78	6	Incidence	180	Kenya	3	Both	27	Age-standardized	682	Caries of permanent teeth	3	Rate	1990	2021	-2.24917	-0.318748	-3.92462
79	6	Incidence	109	Republic of Cuba	3	Both	27	Age-standardized	682	Caries of permanent teeth	3	Rate	1990	2021	1.51361	7.04175	-4.5603
80	6	Incidence	21	Oceania	3	Both	27	Age-standardized	682	Caries of permanent teeth	3	Rate	1990	2021	0.0281029	4.60216	-4.5624
81	6	Incidence	92	Kingdom of Spain	3	Both	27	Age-standardized	682	Caries of permanent teeth	3	Rate	1990	2021	2.46626	12.43	-7.50701
82	6	Incidence	136	Republic of Paraguay	3	Both	27	Age-standardized	682	Caries of permanent teeth	3	Rate	1990	2021	-2.55189	6.00015	-12.1462
83	6	Incidence	87	Grand Duchy of Luxembourg	3	Both	27	Age-standardized	682	Caries of permanent teeth	3	Rate	1990	2021	2.77338	9.14363	-4.82249
84	6	Incidence	75	Republic of Austria	3	Both	27	Age-standardized	682	Caries of permanent teeth	3	Rate	1990	2021	3.57789	11.3718	-2.33092
85	6	Incidence	248	Eastern Africa	3	Both	27	Age-standardized	682	Caries of permanent teeth	3	Rate	1990	2021	1.22874	3.40219	-1.04214
86	6	Incidence	119	Republic of Trinidad and Tobago	3	Both	27	Age-standardized	682	Caries of permanent teeth	3	Rate	1990	2021	-2.6912	20.4993	-20.7237
87	6	Incidence	97	Argentine Republic	3	Both	27	Age-standardized	682	Caries of permanent teeth	3	Rate	1990	2021	-0.179522	7.33756	-6.26352
88	6	Incidence	305	Bermuda	3	Both	27	Age-standardized	682	Caries of permanent teeth	3	Rate	1990	2021	1.09654	6.88568	-5.63348
89	6	Incidence	33	Republic of Armenia	3	Both	27	Age-standardized	682	Caries of permanent teeth	3	Rate	1990	2021	0.951677	7.40842	-5.44373
90	6	Incidence	208	Guinea	3	Both	27	Age-standardized	682	Caries of permanent teeth	3	Rate	1990	2021	0.0183441	6.96582	-7.18683
91	6	Incidence	53	Republic of Serbia	3	Both	27	Age-standardized	682	Caries of permanent teeth	3	Rate	1990	2021	2.08745	12.3491	-5.74674
92	6	Incidence	114	Republic of Haiti	3	Both	27	Age-standardized	682	Caries of permanent teeth	3	Rate	1990	2021	-1.27282	10.2131	-11.506
93	6	Incidence	31	Central Europe, Eastern Europe, and Central Asia	3	Both	27	Age-standardized	682	Caries of permanent teeth	3	Rate	1990	2021	0.841472	2.16287	-0.561313
94	6	Incidence	173	Gabon	3	Both	27	Age-standardized	682	Caries of permanent teeth	3	Rate	1990	2021	0.983798	8.79356	-5.30946
95	6	Incidence	168	Angola	3	Both	27	Age-standardized	682	Caries of permanent teeth	3	Rate	1990	2021	0.366961	7.61548	-6.44478
96	6	Incidence	58	Republic of Estonia	3	Both	27	Age-standardized	682	Caries of permanent teeth	3	Rate	1990	2021	-1.06838	9.46488	-9.92236
97	6	Incidence	9	Southeast Asia	3	Both	27	Age-standardized	682	Caries of permanent teeth	3	Rate	1990	2021	0.83869	3.31076	-1.81328
98	6	Incidence	218	Togo	3	Both	27	Age-standardized	682	Caries of permanent teeth	3	Rate	1990	2021	-2.37035	8.31185	-13.5525
99	6	Incidence	243	Middle East & North Africa - WB	3	Both	27	Age-standardized	682	Caries of permanent teeth	3	Rate	1990	2021	0.648721	2.94224	-1.87329
100	6	Incidence	4	Southeast Asia, East Asia, and Oceania	3	Both	27	Age-standardized	682	Caries of permanent teeth	3	Rate	1990	2021	21.3983	29.0203	15.9984
101	6	Incidence	16	Republic of the Philippines	3	Both	27	Age-standardized	682	Caries of permanent teeth	3	Rate	1990	2021	1.29779	3.7375	-0.699763
102	6	Incidence	146	Lebanon	3	Both	27	Age-standardized	682	Caries of permanent teeth	3	Rate	1990	2021	1.82168	8.26115	-4.61424
103	6	Incidence	263	Western Africa	3	Both	27	Age-standardized	682	Caries of permanent teeth	3	Rate	1990	2021	-1.96174	-0.0145938	-3.68502
104	6	Incidence	213	Niger	3	Both	27	Age-standardized	682	Caries of permanent teeth	3	Rate	1990	2021	0.158662	6.93823	-7.34461
105	6	Incidence	134	Tropical Latin America	3	Both	27	Age-standardized	682	Caries of permanent teeth	3	Rate	1990	2021	1.24011	3.74176	-1.11857
106	6	Incidence	178	Eritrea	3	Both	27	Age-standardized	682	Caries of permanent teeth	3	Rate	1990	2021	1.41271	8.81147	-4.25346
107	6	Incidence	141	Arab Republic of Egypt	3	Both	27	Age-standardized	682	Caries of permanent teeth	3	Rate	1990	2021	1.80854	9.8426	-5.6676
108	6	Incidence	48	Hungary	3	Both	27	Age-standardized	682	Caries of permanent teeth	3	Rate	1990	2021	3.41586	10.6678	-3.82534
109	6	Incidence	139	People's Democratic Republic of Algeria	3	Both	27	Age-standardized	682	Caries of permanent teeth	3	Rate	1990	2021	1.61981	7.44885	-6.1503
110	6	Incidence	102	United States of America	3	Both	27	Age-standardized	682	Caries of permanent teeth	3	Rate	1990	2021	-3.03625	0.272433	-6.22439
111	6	Incidence	151	Qatar	3	Both	27	Age-standardized	682	Caries of permanent teeth	3	Rate	1990	2021	3.6705	10.435	-3.3342
112	6	Incidence	46	Republic of Croatia	3	Both	27	Age-standardized	682	Caries of permanent teeth	3	Rate	1990	2021	4.60332	13.6421	-3.26945
113	6	Incidence	201	Burkina Faso	3	Both	27	Age-standardized	682	Caries of permanent teeth	3	Rate	1990	2021	0.299427	7.37092	-6.4044
114	6	Incidence	129	Republic of Honduras	3	Both	27	Age-standardized	682	Caries of permanent teeth	3	Rate	1990	2021	2.4443	8.62425	-6.5009
115	6	Incidence	194	Lesotho	3	Both	27	Age-standardized	682	Caries of permanent teeth	3	Rate	1990	2021	-0.318328	6.2459	-6.88722
116	6	Incidence	156	United Arab Emirates	3	Both	27	Age-standardized	682	Caries of permanent teeth	3	Rate	1990	2021	-0.883657	4.50689	-6.89425
117	6	Incidence	68	Republic of Korea	3	Both	27	Age-standardized	682	Caries of permanent teeth	3	Rate	1990	2021	-1.02085	5.6469	-7.46083
118	6	Incidence	206	Gambia	3	Both	27	Age-standardized	682	Caries of permanent teeth	3	Rate	1990	2021	1.4981	9.64014	-4.87775
119	6	Incidence	124	Central Latin America	3	Both	27	Age-standardized	682	Caries of permanent teeth	3	Rate	1990	2021	-0.329127	2.51275	-2.66892
120	6	Incidence	26	Independent State of Papua New Guinea	3	Both	27	Age-standardized	682	Caries of permanent teeth	3	Rate	1990	2021	-0.0492736	6.57151	-6.06689
121	6	Incidence	216	Senegal	3	Both	27	Age-standardized	682	Caries of permanent teeth	3	Rate	1990	2021	-0.190318	6.4498	-7.19492
122	6	Incidence	80	French Republic	3	Both	27	Age-standardized	682	Caries of permanent teeth	3	Rate	1990	2021	-0.832769	9.34403	-9.42176
123	6	Incidence	95	United Kingdom of Great Britain and Northern Ireland	3	Both	27	Age-standardized	682	Caries of permanent teeth	3	Rate	1990	2021	0.248682	2.53909	-1.94263
124	6	Incidence	90	Kingdom of Norway	3	Both	27	Age-standardized	682	Caries of permanent teeth	3	Rate	1990	2021	1.51696	3.52504	-0.718483
125	6	Incidence	73	Western Europe	3	Both	27	Age-standardized	682	Caries of permanent teeth	3	Rate	1990	2021	0.529594	4.69692	-3.07611
126	6	Incidence	482	Eastern Cape	3	Both	27	Age-standardized	682	Caries of permanent teeth	3	Rate	1990	2021	5.43222	14.6304	-2.62627
127	6	Incidence	183	Mauritius	3	Both	27	Age-standardized	682	Caries of permanent teeth	3	Rate	1990	2021	1.6154	9.42264	-5.21451
128	6	Incidence	107	Barbados	3	Both	27	Age-standardized	682	Caries of permanent teeth	3	Rate	1990	2021	1.50984	8.11795	-4.43597
129	6	Incidence	63	Ukraine	3	Both	27	Age-standardized	682	Caries of permanent teeth	3	Rate	1990	2021	-0.355624	5.87341	-5.14308
130	6	Incidence	487	Mpumalanga	3	Both	27	Age-standardized	682	Caries of permanent teeth	3	Rate	1990	2021	5.27994	13.9561	-2.75671
131	6	Incidence	171	Democratic Republic of the Congo	3	Both	27	Age-standardized	682	Caries of permanent teeth	3	Rate	1990	2021	0.274451	7.77351	-5.87914
132	6	Incidence	105	Antigua and Barbuda	3	Both	27	Age-standardized	682	Caries of permanent teeth	3	Rate	1990	2021	1.31719	7.11689	-4.79331
133	6	Incidence	19	Democratic Republic of Timor-Leste	3	Both	27	Age-standardized	682	Caries of permanent teeth	3	Rate	1990	2021	2.97197	10.3564	-3.15044
134	6	Incidence	159	South Asia	3	Both	27	Age-standardized	682	Caries of permanent teeth	3	Rate	1990	2021	1.67797	4.07137	-0.754784
135	6	Incidence	117	Saint Vincent and the Grenadines	3	Both	27	Age-standardized	682	Caries of permanent teeth	3	Rate	1990	2021	8.07574	19.7627	-1.30894
136	6	Incidence	85	State of Israel	3	Both	27	Age-standardized	682	Caries of permanent teeth	3	Rate	1990	2021	3.47929	12.2501	-3.63542
137	6	Incidence	416	Tuvalu	3	Both	27	Age-standardized	682	Caries of permanent teeth	3	Rate	1990	2021	-0.598201	5.97894	-7.17894
138	6	Incidence	199	Western Sub-Saharan Africa	3	Both	27	Age-standardized	682	Caries of permanent teeth	3	Rate	1990	2021	-1.75257	0.0696001	-3.53855
139	6	Incidence	14	Republic of Maldives	3	Both	27	Age-standardized	682	Caries of permanent teeth	3	Rate	1990	2021	2.31096	9.08216	-4.38444
140	6	Incidence	12	Lao People's Democratic Republic	3	Both	27	Age-standardized	682	Caries of permanent teeth	3	Rate	1990	2021	1.57707	7.99293	-5.97035
141	6	Incidence	211	Mali	3	Both	27	Age-standardized	682	Caries of permanent teeth	3	Rate	1990	2021	0.631667	7.8917	-5.10321
142	6	Incidence	36	Republic of Kazakhstan	3	Both	27	Age-standardized	682	Caries of permanent teeth	3	Rate	1990	2021	2.69593	10.5832	-3.70305
143	6	Incidence	100	High-income North America	3	Both	27	Age-standardized	682	Caries of permanent teeth	3	Rate	1990	2021	-2.98414	0.176231	-6.02716
144	6	Incidence	351	Guam	3	Both	27	Age-standardized	682	Caries of permanent teeth	3	Rate	1990	2021	0.967481	7.78341	-7.47784
145	6	Incidence	149	Palestine	3	Both	27	Age-standardized	682	Caries of permanent teeth	3	Rate	1990	2021	1.40871	8.21093	-6.31115
146	6	Incidence	166	Sub-Saharan Africa	3	Both	27	Age-standardized	682	Caries of permanent teeth	3	Rate	1990	2021	0.365366	1.76482	-0.981928
147	6	Incidence	41	Republic of Uzbekistan	3	Both	27	Age-standardized	682	Caries of permanent teeth	3	Rate	1990	2021	1.08427	7.70481	-4.8049
148	6	Incidence	61	Republic of Moldova	3	Both	27	Age-standardized	682	Caries of permanent teeth	3	Rate	1990	2021	-0.554552	5.65352	-8.01132
149	6	Incidence	56	Eastern Europe	3	Both	27	Age-standardized	682	Caries of permanent teeth	3	Rate	1990	2021	-0.508129	1.30538	-2.22807
150	6	Incidence	161	Bangladesh	3	Both	27	Age-standardized	682	Caries of permanent teeth	3	Rate	1990	2021	2.136	9.94007	-5.58612
151	6	Incidence	78	Kingdom of Denmark	3	Both	27	Age-standardized	682	Caries of permanent teeth	3	Rate	1990	2021	7.38635	21.2106	-4.38454
152	6	Incidence	192	Southern Sub-Saharan Africa	3	Both	27	Age-standardized	682	Caries of permanent teeth	3	Rate	1990	2021	3.3932	7.08767	0.200695
153	6	Incidence	189	United Republic of Tanzania	3	Both	27	Age-standardized	682	Caries of permanent teeth	3	Rate	1990	2021	9.3954	23.4892	-2.0319
154	6	Incidence	112	Grenada	3	Both	27	Age-standardized	682	Caries of permanent teeth	3	Rate	1990	2021	2.21049	9.67468	-3.55115
155	6	Incidence	132	Republic of Panama	3	Both	27	Age-standardized	682	Caries of permanent teeth	3	Rate	1990	2021	4.62611	12.0754	-4.08756
156	6	Incidence	380	Palau	3	Both	27	Age-standardized	682	Caries of permanent teeth	3	Rate	1990	2021	1.06491	6.79949	-4.59102
157	6	Incidence	154	Tunisia	3	Both	27	Age-standardized	682	Caries of permanent teeth	3	Rate	1990	2021	2.77602	9.52688	-3.51239
158	6	Incidence	71	Australia	3	Both	27	Age-standardized	682	Caries of permanent teeth	3	Rate	1990	2021	14.4156	30.7149	2.07572
159	6	Incidence	367	Monaco	3	Both	27	Age-standardized	682	Caries of permanent teeth	3	Rate	1990	2021	2.27096	10.183	-4.6795
160	6	Incidence	164	Nepal	3	Both	27	Age-standardized	682	Caries of permanent teeth	3	Rate	1990	2021	0.053111	8.3629	-7.56918
161	6	Incidence	24	Republic of the Marshall Islands	3	Both	27	Age-standardized	682	Caries of permanent teeth	3	Rate	1990	2021	1.81747	8.97409	-5.29293
162	6	Incidence	66	Brunei Darussalam	3	Both	27	Age-standardized	682	Caries of permanent teeth	3	Rate	1990	2021	1.26809	11.0148	-6.78648
163	6	Incidence	127	Republic of El Salvador	3	Both	27	Age-standardized	682	Caries of permanent teeth	3	Rate	1990	2021	0.832887	7.06361	-4.98556
164	6	Incidence	478	World Bank Regions	3	Both	27	Age-standardized	682	Caries of permanent teeth	3	Rate	1990	2021	6.0068	7.85757	4.31765
165	6	Incidence	110	Commonwealth of Dominica	3	Both	27	Age-standardized	682	Caries of permanent teeth	3	Rate	1990	2021	1.1713	7.80191	-5.45174
166	6	Incidence	39	Republic of Tajikistan	3	Both	27	Age-standardized	682	Caries of permanent teeth	3	Rate	1990	2021	0.475726	8.17583	-6.38828
167	6	Incidence	122	Republic of Ecuador	3	Both	27	Age-standardized	682	Caries of permanent teeth	3	Rate	1990	2021	1.02642	6.72839	-4.9972
168	6	Incidence	204	Chad	3	Both	27	Age-standardized	682	Caries of permanent teeth	3	Rate	1990	2021	0.775754	7.77789	-6.00583
169	6	Incidence	174	Eastern Sub-Saharan Africa	3	Both	27	Age-standardized	682	Caries of permanent teeth	3	Rate	1990	2021	1.7475	4.04376	-0.426759
170	6	Incidence	241	Latin America & Caribbean - WB	3	Both	27	Age-standardized	682	Caries of permanent teeth	3	Rate	1990	2021	0.42595	2.2284	-1.14206
171	6	Incidence	485	KwaZulu-Natal	3	Both	27	Age-standardized	682	Caries of permanent teeth	3	Rate	1990	2021	3.32707	14.6448	-6.73872
172	6	Incidence	93	Kingdom of Sweden	3	Both	27	Age-standardized	682	Caries of permanent teeth	3	Rate	1990	2021	12.5458	21.803	4.87207
173	6	Incidence	144	Hashemite Kingdom of Jordan	3	Both	27	Age-standardized	682	Caries of permanent teeth	3	Rate	1990	2021	0.599873	6.89895	-6.24954
174	6	Incidence	7	Democratic People's Republic of Korea	3	Both	27	Age-standardized	682	Caries of permanent teeth	3	Rate	1990	2021	6.76214	17.4605	-3.58232
175	6	Incidence	197	Eswatini	3	Both	27	Age-standardized	682	Caries of permanent teeth	3	Rate	1990	2021	-0.0289857	6.54214	-7.06487
176	6	Incidence	29	Kingdom of Tonga	3	Both	27	Age-standardized	682	Caries of permanent teeth	3	Rate	1990	2021	-0.020465	7.30789	-7.61311
177	6	Incidence	83	Republic of Iceland	3	Both	27	Age-standardized	682	Caries of permanent teeth	3	Rate	1990	2021	-7.16055	4.46785	-17.766
178	6	Incidence	490	Western Cape	3	Both	27	Age-standardized	682	Caries of permanent teeth	3	Rate	1990	2021	5.4422	12.7024	-2.74107
179	6	Incidence	51	Republic of Poland	3	Both	27	Age-standardized	682	Caries of permanent teeth	3	Rate	1990	2021	3.14651	5.51	0.760122
180	6	Incidence	120	Andean Latin America	3	Both	27	Age-standardized	682	Caries of permanent teeth	3	Rate	1990	2021	1.23552	5.20085	-2.32964
181	6	Incidence	209	Guinea-Bissau	3	Both	27	Age-standardized	682	Caries of permanent teeth	3	Rate	1990	2021	-0.112102	5.21104	-5.59062
182	6	Incidence	186	Seychelles	3	Both	27	Age-standardized	682	Caries of permanent teeth	3	Rate	1990	2021	0.835833	7.58631	-5.57485
183	6	Incidence	76	Kingdom of Belgium	3	Both	27	Age-standardized	682	Caries of permanent teeth	3	Rate	1990	2021	2.6955	11.9651	-4.9831
184	6	Incidence	374	Niue	3	Both	27	Age-standardized	682	Caries of permanent teeth	3	Rate	1990	2021	1.70146	8.15721	-3.82799
185	6	Incidence	254	Northern Africa	3	Both	27	Age-standardized	682	Caries of permanent teeth	3	Rate	1990	2021	0.749796	5.11419	-3.85293
186	6	Incidence	98	Republic of Chile	3	Both	27	Age-standardized	682	Caries of permanent teeth	3	Rate	1990	2021	-0.203894	16.6609	-11.4362
187	6	Incidence	176	Comoros	3	Both	27	Age-standardized	682	Caries of permanent teeth	3	Rate	1990	2021	0.907749	8.81588	-4.6508
188	6	Incidence	434	Scotland	3	Both	27	Age-standardized	682	Caries of permanent teeth	3	Rate	1990	2021	1.43448	8.73901	-5.42036
189	6	Incidence	137	North Africa and Middle East	3	Both	27	Age-standardized	682	Caries of permanent teeth	3	Rate	1990	2021	1.03741	3.2807	-1.27897
190	6	Incidence	396	San Marino	3	Both	27	Age-standardized	682	Caries of permanent teeth	3	Rate	1990	2021	2.53821	9.75088	-4.6912
191	6	Incidence	54	Slovak Republic	3	Both	27	Age-standardized	682	Caries of permanent teeth	3	Rate	1990	2021	3.00061	9.48967	-3.35024
192	6	Incidence	239	East Asia & Pacific - WB	3	Both	27	Age-standardized	682	Caries of permanent teeth	3	Rate	1990	2021	17.5012	24.1397	12.8682
193	6	Incidence	207	Ghana	3	Both	27	Age-standardized	682	Caries of permanent teeth	3	Rate	1990	2021	-0.178423	8.38947	-8.55514
194	6	Incidence	202	Cameroon	3	Both	27	Age-standardized	682	Caries of permanent teeth	3	Rate	1990	2021	0.435851	7.38326	-5.65295
195	6	Incidence	157	Yemen	3	Both	27	Age-standardized	682	Caries of permanent teeth	3	Rate	1990	2021	2.37001	11.3923	-6.17701
196	6	Incidence	34	Republic of Azerbaijan	3	Both	27	Age-standardized	682	Caries of permanent teeth	3	Rate	1990	2021	2.21603	9.40683	-4.46842
197	6	Incidence	103	Latin America and Caribbean	3	Both	27	Age-standardized	682	Caries of permanent teeth	3	Rate	1990	2021	0.217933	2.03274	-1.22161
198	6	Incidence	298	American Samoa	3	Both	27	Age-standardized	682	Caries of permanent teeth	3	Rate	1990	2021	0.155102	7.24498	-5.59355
199	6	Incidence	22	Republic of Fiji	3	Both	27	Age-standardized	682	Caries of permanent teeth	3	Rate	1990	2021	1.91146	8.84594	-4.15467
200	6	Incidence	320	Cook Islands	3	Both	27	Age-standardized	682	Caries of permanent teeth	3	Rate	1990	2021	1.69493	8.35795	-4.5232
201	6	Incidence	17	Democratic Socialist Republic of Sri Lanka	3	Both	27	Age-standardized	682	Caries of permanent teeth	3	Rate	1990	2021	0.205174	5.52173	-6.90321
202	6	Incidence	140	Kingdom of Bahrain	3	Both	27	Age-standardized	682	Caries of permanent teeth	3	Rate	1990	2021	1.48162	10.088	-4.89491
203	6	Incidence	44	Bosnia and Herzegovina	3	Both	27	Age-standardized	682	Caries of permanent teeth	3	Rate	1990	2021	6.21827	17.2409	-2.26408
204	6	Incidence	88	Republic of Malta	3	Both	27	Age-standardized	682	Caries of permanent teeth	3	Rate	1990	2021	1.81852	7.41784	-3.22978
205	6	Incidence	244	South Asia - WB	3	Both	27	Age-standardized	682	Caries of permanent teeth	3	Rate	1990	2021	1.68495	4.02468	-0.676507
206	6	Incidence	108	Belize	3	Both	27	Age-standardized	682	Caries of permanent teeth	3	Rate	1990	2021	0.677407	11.9435	-9.65012
207	6	Incidence	181	Madagascar	3	Both	27	Age-standardized	682	Caries of permanent teeth	3	Rate	1990	2021	6.19529	17.7058	-3.61609
208	6	Incidence	115	Jamaica	3	Both	27	Age-standardized	682	Caries of permanent teeth	3	Rate	1990	2021	2.29786	9.54996	-3.52978
209	6	Incidence	169	Central African Republic	3	Both	27	Age-standardized	682	Caries of permanent teeth	3	Rate	1990	2021	-1.52222	5.29407	-7.69072
210	6	Incidence	179	Ethiopia	3	Both	27	Age-standardized	682	Caries of permanent teeth	3	Rate	1990	2021	-0.30915	3.32834	-3.3713
211	6	Incidence	86	Republic of Italy	3	Both	27	Age-standardized	682	Caries of permanent teeth	3	Rate	1990	2021	-0.611258	3.90708	-3.99519
212	6	Incidence	147	Libya	3	Both	27	Age-standardized	682	Caries of permanent teeth	3	Rate	1990	2021	1.81248	10.4092	-5.49809
213	6	Incidence	195	Namibia	3	Both	27	Age-standardized	682	Caries of permanent teeth	3	Rate	1990	2021	7.18492	19.0073	-2.0912
214	6	Incidence	49	North Macedonia	3	Both	27	Age-standardized	682	Caries of permanent teeth	3	Rate	1990	2021	4.77868	13.7845	-4.036
215	6	Incidence	125	Republic of Colombia	3	Both	27	Age-standardized	682	Caries of permanent teeth	3	Rate	1990	2021	2.8828	12.3422	-4.594
216	6	Incidence	524	Alaska	3	Both	27	Age-standardized	682	Caries of permanent teeth	3	Rate	1990	2021	-5.82313	3.21687	-13.0856
217	6	Incidence	135	Federative Republic of Brazil	3	Both	27	Age-standardized	682	Caries of permanent teeth	3	Rate	1990	2021	1.50455	3.99195	-1.04005
218	6	Incidence	130	United Mexican States	3	Both	27	Age-standardized	682	Caries of permanent teeth	3	Rate	1990	2021	-2.58917	0.262787	-5.32692
219	6	Incidence	184	Mozambique	3	Both	27	Age-standardized	682	Caries of permanent teeth	3	Rate	1990	2021	14.8128	25.5455	4.40791
220	6	Incidence	214	Nigeria	3	Both	27	Age-standardized	682	Caries of permanent teeth	3	Rate	1990	2021	-3.57351	-1.0898	-5.56097
221	6	Incidence	142	Islamic Republic of Iran	3	Both	27	Age-standardized	682	Caries of permanent teeth	3	Rate	1990	2021	0.31614	1.77241	-1.12763
222	6	Incidence	162	Bhutan	3	Both	27	Age-standardized	682	Caries of permanent teeth	3	Rate	1990	2021	1.93098	9.92149	-5.16864
223	6	Incidence	546	Minnesota	3	Both	27	Age-standardized	682	Caries of permanent teeth	3	Rate	1990	2021	-4.80619	3.69911	-12.8073
224	6	Incidence	172	Equatorial Guinea	3	Both	27	Age-standardized	682	Caries of permanent teeth	3	Rate	1990	2021	1.08616	8.12973	-6.12704
225	6	Incidence	483	Free State	3	Both	27	Age-standardized	682	Caries of permanent teeth	3	Rate	1990	2021	6.56447	14.2846	-1.9377
226	6	Incidence	152	Saudi Arabia	3	Both	27	Age-standardized	682	Caries of permanent teeth	3	Rate	1990	2021	2.45641	8.7172	-2.30433
227	6	Incidence	217	Sierra Leone	3	Both	27	Age-standardized	682	Caries of permanent teeth	3	Rate	1990	2021	5.1173	17.9053	-8.20276
228	6	Incidence	551	Nevada	3	Both	27	Age-standardized	682	Caries of permanent teeth	3	Rate	1990	2021	3.22759	16.9618	-9.10019
229	6	Incidence	212	Mauritania	3	Both	27	Age-standardized	682	Caries of permanent teeth	3	Rate	1990	2021	0.920278	7.62165	-5.15356
230	6	Incidence	488	North-West	3	Both	27	Age-standardized	682	Caries of permanent teeth	3	Rate	1990	2021	5.38682	14.5493	-4.26252
231	6	Incidence	385	Puerto Rico	3	Both	27	Age-standardized	682	Caries of permanent teeth	3	Rate	1990	2021	1.72307	8.09702	-4.53797
232	6	Incidence	529	Connecticut	3	Both	27	Age-standardized	682	Caries of permanent teeth	3	Rate	1990	2021	-4.5467	2.88381	-12.3833
233	6	Incidence	167	Central Sub-Saharan Africa	3	Both	27	Age-standardized	682	Caries of permanent teeth	3	Rate	1990	2021	0.265054	5.07403	-4.65677
234	6	Incidence	81	Federal Republic of Germany	3	Both	27	Age-standardized	682	Caries of permanent teeth	3	Rate	1990	2021	-1.99325	13.1997	-13.7917
235	6	Incidence	422	United States Virgin Islands	3	Both	27	Age-standardized	682	Caries of permanent teeth	3	Rate	1990	2021	1.50836	8.10002	-4.77911
236	6	Incidence	118	Republic of Suriname	3	Both	27	Age-standardized	682	Caries of permanent teeth	3	Rate	1990	2021	0.37636	7.92924	-6.16373
237	6	Incidence	556	North Carolina	3	Both	27	Age-standardized	682	Caries of permanent teeth	3	Rate	1990	2021	-1.29205	10.5336	-12.1151
238	6	Incidence	4622	West Midlands	3	Both	27	Age-standardized	682	Caries of permanent teeth	3	Rate	1990	2021	-0.111085	4.25336	-3.98964
239	6	Incidence	205	C么te d'Ivoire	3	Both	27	Age-standardized	682	Caries of permanent teeth	3	Rate	1990	2021	-0.407156	5.18316	-7.17815
240	6	Incidence	150	Oman	3	Both	27	Age-standardized	682	Caries of permanent teeth	3	Rate	1990	2021	1.75056	8.56443	-4.76617
241	6	Incidence	479	WHO region	3	Both	27	Age-standardized	682	Caries of permanent teeth	3	Rate	1990	2021	5.95636	7.80653	4.25589
242	6	Incidence	561	Pennsylvania	3	Both	27	Age-standardized	682	Caries of permanent teeth	3	Rate	1990	2021	5.82645	21.2249	-5.99317
243	6	Incidence	539	Kansas	3	Both	27	Age-standardized	682	Caries of permanent teeth	3	Rate	1990	2021	-4.58083	3.78354	-13.234
244	6	Incidence	242	Sub-Saharan Africa - WB	3	Both	27	Age-standardized	682	Caries of permanent teeth	3	Rate	1990	2021	0.437642	1.83578	-0.94821
245	6	Incidence	4636	Wales	3	Both	27	Age-standardized	682	Caries of permanent teeth	3	Rate	1990	2021	3.43236	10.1965	-3.23529
246	6	Incidence	261	Southern Africa	3	Both	27	Age-standardized	682	Caries of permanent teeth	3	Rate	1990	2021	3.87505	6.75085	0.788631
247	6	Incidence	113	Republic of Guyana	3	Both	27	Age-standardized	682	Caries of permanent teeth	3	Rate	1990	2021	2.08217	9.05903	-4.21988
248	6	Incidence	522	Sudan	3	Both	27	Age-standardized	682	Caries of permanent teeth	3	Rate	1990	2021	2.78396	8.95714	-2.49826
249	6	Incidence	435	South Sudan	3	Both	27	Age-standardized	682	Caries of permanent teeth	3	Rate	1990	2021	-0.0862138	6.90756	-6.24171
250	6	Incidence	534	Hawaii	3	Both	27	Age-standardized	682	Caries of permanent teeth	3	Rate	1990	2021	-4.75963	2.54509	-12.516
251	6	Incidence	4647	Coahuila	3	Both	27	Age-standardized	682	Caries of permanent teeth	3	Rate	1990	2021	-2.71919	3.73356	-10.425
252	6	Incidence	369	Nauru	3	Both	27	Age-standardized	682	Caries of permanent teeth	3	Rate	1990	2021	-0.491159	6.01488	-5.96491
253	6	Incidence	486	Limpopo	3	Both	27	Age-standardized	682	Caries of permanent teeth	3	Rate	1990	2021	2.82575	14.1352	-8.3888
254	6	Incidence	190	Uganda	3	Both	27	Age-standardized	682	Caries of permanent teeth	3	Rate	1990	2021	-0.139771	8.94584	-7.10464
255	6	Incidence	566	Texas	3	Both	27	Age-standardized	682	Caries of permanent teeth	3	Rate	1990	2021	-3.17097	4.866	-10.3942
256	6	Incidence	4674	Zacatecas	3	Both	27	Age-standardized	682	Caries of permanent teeth	3	Rate	1990	2021	-2.53142	3.65194	-8.08627
257	6	Incidence	554	New Mexico	3	Both	27	Age-standardized	682	Caries of permanent teeth	3	Rate	1990	2021	-5.12994	3.60217	-12.4402
258	6	Incidence	200	Benin	3	Both	27	Age-standardized	682	Caries of permanent teeth	3	Rate	1990	2021	-0.0876276	7.1568	-6.31009
259	6	Incidence	413	Tokelau	3	Both	27	Age-standardized	682	Caries of permanent teeth	3	Rate	1990	2021	1.1438	6.90917	-4.78701
260	6	Incidence	544	Massachusetts	3	Both	27	Age-standardized	682	Caries of permanent teeth	3	Rate	1990	2021	-5.10287	2.64761	-12.5154
261	6	Incidence	4735	South Sulawesi	3	Both	27	Age-standardized	682	Caries of permanent teeth	3	Rate	1990	2021	0.44966	8.94294	-6.39722
262	6	Incidence	571	West Virginia	3	Both	27	Age-standardized	682	Caries of permanent teeth	3	Rate	1990	2021	0.154299	8.53537	-8.27329
263	6	Incidence	549	Montana	3	Both	27	Age-standardized	682	Caries of permanent teeth	3	Rate	1990	2021	-5.31578	15.4597	-22.1907
264	6	Incidence	177	Djibouti	3	Both	27	Age-standardized	682	Caries of permanent teeth	3	Rate	1990	2021	-0.475598	6.32036	-6.95686
265	6	Incidence	4669	Tabasco	3	Both	27	Age-standardized	682	Caries of permanent teeth	3	Rate	1990	2021	-1.78672	4.50301	-10.6921
266	6	Incidence	210	Liberia	3	Both	27	Age-standardized	682	Caries of permanent teeth	3	Rate	1990	2021	0.691747	8.98288	-5.94696
267	6	Incidence	4652	Durango	3	Both	27	Age-standardized	682	Caries of permanent teeth	3	Rate	1990	2021	-3.54469	3.12483	-11.108
268	6	Incidence	4620	Yorkshire and the Humber	3	Both	27	Age-standardized	682	Caries of permanent teeth	3	Rate	1990	2021	-0.923469	4.40542	-5.04149
269	6	Incidence	4713	Jambi	3	Both	27	Age-standardized	682	Caries of permanent teeth	3	Rate	1990	2021	0.665863	7.27938	-5.66985
270	6	Incidence	4740	North Maluku	3	Both	27	Age-standardized	682	Caries of permanent teeth	3	Rate	1990	2021	0.366641	6.05257	-6.00992
271	6	Incidence	4625	South East England	3	Both	27	Age-standardized	682	Caries of permanent teeth	3	Rate	1990	2021	1.22798	2.90583	-0.256345
272	6	Incidence	376	Northern Mariana Islands	3	Both	27	Age-standardized	682	Caries of permanent teeth	3	Rate	1990	2021	-0.697251	5.85831	-6.62981
273	6	Incidence	4645	Baja California Sur	3	Both	27	Age-standardized	682	Caries of permanent teeth	3	Rate	1990	2021	-3.75656	2.00525	-10.14
274	6	Incidence	4771	Roraima	3	Both	27	Age-standardized	682	Caries of permanent teeth	3	Rate	1990	2021	0.433851	6.89672	-5.9801
275	6	Incidence	527	California	3	Both	27	Age-standardized	682	Caries of permanent teeth	3	Rate	1990	2021	-4.38739	2.96852	-12.6972
276	6	Incidence	4718	Riau Islands	3	Both	27	Age-standardized	682	Caries of permanent teeth	3	Rate	1990	2021	0.692663	6.71629	-5.15728
277	6	Incidence	4662	Oaxaca	3	Both	27	Age-standardized	682	Caries of permanent teeth	3	Rate	1990	2021	-2.53962	4.05645	-10.1105
278	6	Incidence	532	Florida	3	Both	27	Age-standardized	682	Caries of permanent teeth	3	Rate	1990	2021	-4.02655	2.80917	-10.9939
279	6	Incidence	145	State of Kuwait	3	Both	27	Age-standardized	682	Caries of permanent teeth	3	Rate	1990	2021	0.914639	7.79473	-5.80932
280	6	Incidence	4657	M茅xico	3	Both	27	Age-standardized	682	Caries of permanent teeth	3	Rate	1990	2021	-2.66713	4.38135	-10.0366
281	6	Incidence	4723	Yogyakarta	3	Both	27	Age-standardized	682	Caries of permanent teeth	3	Rate	1990	2021	1.34942	8.67157	-6.06872
282	6	Incidence	525	Arizona	3	Both	27	Age-standardized	682	Caries of permanent teeth	3	Rate	1990	2021	-4.15029	3.20317	-11.4317
283	6	Incidence	4667	Sinaloa	3	Both	27	Age-standardized	682	Caries of permanent teeth	3	Rate	1990	2021	-2.80501	6.1172	-10.7032
284	6	Incidence	542	Maine	3	Both	27	Age-standardized	682	Caries of permanent teeth	3	Rate	1990	2021	-3.56198	4.66324	-11.9479
285	6	Incidence	4749	England	3	Both	27	Age-standardized	682	Caries of permanent teeth	3	Rate	1990	2021	-0.0796132	2.46075	-2.46647
286	6	Incidence	559	Oklahoma	3	Both	27	Age-standardized	682	Caries of permanent teeth	3	Rate	1990	2021	-3.64621	5.26324	-12.4627
287	6	Incidence	537	Indiana	3	Both	27	Age-standardized	682	Caries of permanent teeth	3	Rate	1990	2021	1.58439	22.9859	-15.7612
288	6	Incidence	4733	North Sulawesi	3	Both	27	Age-standardized	682	Caries of permanent teeth	3	Rate	1990	2021	0.546835	8.04239	-7.19775
289	6	Incidence	4776	Tocantins	3	Both	27	Age-standardized	682	Caries of permanent teeth	3	Rate	1990	2021	0.434838	7.68272	-6.41874
290	6	Incidence	4672	Veracruz de Ignacio de la Llave	3	Both	27	Age-standardized	682	Caries of permanent teeth	3	Rate	1990	2021	-4.49843	4.81686	-13.754
291	6	Incidence	4728	East Nusa Tenggara	3	Both	27	Age-standardized	682	Caries of permanent teeth	3	Rate	1990	2021	1.84948	9.6617	-5.73941
292	6	Incidence	4754	Bahia	3	Both	27	Age-standardized	682	Caries of permanent teeth	3	Rate	1990	2021	0.112554	7.3952	-6.4604
293	6	Incidence	349	Greenland	3	Both	27	Age-standardized	682	Caries of permanent teeth	3	Rate	1990	2021	-1.55494	8.05424	-9.56993
294	6	Incidence	569	Virginia	3	Both	27	Age-standardized	682	Caries of permanent teeth	3	Rate	1990	2021	-4.22674	4.06	-12.5
295	6	Incidence	4618	North East England	3	Both	27	Age-standardized	682	Caries of permanent teeth	3	Rate	1990	2021	2.09968	4.5969	0.105819
296	6	Incidence	4650	Chihuahua	3	Both	27	Age-standardized	682	Caries of permanent teeth	3	Rate	1990	2021	-2.0556	5.23684	-9.24977
297	6	Incidence	4711	West Sumatra	3	Both	27	Age-standardized	682	Caries of permanent teeth	3	Rate	1990	2021	1.02379	8.43109	-5.29858
298	6	Incidence	564	South Dakota	3	Both	27	Age-standardized	682	Caries of permanent teeth	3	Rate	1990	2021	-5.3584	1.57684	-14.9521
299	6	Incidence	4655	Hidalgo	3	Both	27	Age-standardized	682	Caries of permanent teeth	3	Rate	1990	2021	-2.81724	4.79115	-9.70635
300	6	Incidence	4759	Maranh茫o	3	Both	27	Age-standardized	682	Caries of permanent teeth	3	Rate	1990	2021	-0.10566	7.48377	-7.09721
301	6	Incidence	182	Malawi	3	Both	27	Age-standardized	682	Caries of permanent teeth	3	Rate	1990	2021	0.0383914	6.8107	-8.4107
302	6	Incidence	4743	European Union	3	Both	27	Age-standardized	682	Caries of permanent teeth	3	Rate	1990	2021	1.03944	4.85268	-2.49384
303	6	Incidence	4764	Para铆ba	3	Both	27	Age-standardized	682	Caries of permanent teeth	3	Rate	1990	2021	0.131538	7.841	-7.55417
304	6	Incidence	4738	West Sulawesi	3	Both	27	Age-standardized	682	Caries of permanent teeth	3	Rate	1990	2021	1.04967	7.33505	-4.96716
305	6	Incidence	484	Gauteng	3	Both	27	Age-standardized	682	Caries of permanent teeth	3	Rate	1990	2021	6.09721	13.94	-1.74903
306	6	Incidence	4846	Chhattisgarh	3	Both	27	Age-standardized	682	Caries of permanent teeth	3	Rate	1990	2021	2.12216	8.63475	-4.036
307	6	Incidence	215	Sao Tome and Principe	3	Both	27	Age-standardized	682	Caries of permanent teeth	3	Rate	1990	2021	1.98728	9.065	-4.45605
308	6	Incidence	4769	Rio Grande do Norte	3	Both	27	Age-standardized	682	Caries of permanent teeth	3	Rate	1990	2021	-0.430166	6.5905	-8.13262
309	6	Incidence	4721	West Java	3	Both	27	Age-standardized	682	Caries of permanent teeth	3	Rate	1990	2021	2.33417	7.95013	-3.35584
310	6	Incidence	393	Saint Kitts and Nevis	3	Both	27	Age-standardized	682	Caries of permanent teeth	3	Rate	1990	2021	1.7871	9.08682	-4.48146
311	6	Incidence	547	Mississippi	3	Both	27	Age-standardized	682	Caries of permanent teeth	3	Rate	1990	2021	-4.04451	3.21334	-12.2842
312	6	Incidence	4843	Assam	3	Both	27	Age-standardized	682	Caries of permanent teeth	3	Rate	1990	2021	-0.105403	5.30427	-5.45367
313	6	Incidence	4623	East of England	3	Both	27	Age-standardized	682	Caries of permanent teeth	3	Rate	1990	2021	-0.153082	2.53598	-2.66408
314	6	Incidence	4660	Nayarit	3	Both	27	Age-standardized	682	Caries of permanent teeth	3	Rate	1990	2021	-2.21886	4.18455	-9.74468
315	6	Incidence	4665	Quintana Roo	3	Both	27	Age-standardized	682	Caries of permanent teeth	3	Rate	1990	2021	-2.54601	5.0929	-9.66622
316	6	Incidence	4875	West Bengal	3	Both	27	Age-standardized	682	Caries of permanent teeth	3	Rate	1990	2021	2.35978	7.93221	-2.75403
317	6	Incidence	562	Rhode Island	3	Both	27	Age-standardized	682	Caries of permanent teeth	3	Rate	1990	2021	-4.18598	5.31863	-12.6868
318	6	Incidence	489	Northern Cape	3	Both	27	Age-standardized	682	Caries of permanent teeth	3	Rate	1990	2021	5.93498	15.1613	-0.903287
319	6	Incidence	4774	Sergipe	3	Both	27	Age-standardized	682	Caries of permanent teeth	3	Rate	1990	2021	-1.38183	4.70963	-7.12797
320	6	Incidence	4716	Lampung	3	Both	27	Age-standardized	682	Caries of permanent teeth	3	Rate	1990	2021	0.500154	6.49922	-5.02101
321	6	Incidence	552	New Hampshire	3	Both	27	Age-standardized	682	Caries of permanent teeth	3	Rate	1990	2021	-4.13687	4.02704	-13.442
322	6	Incidence	433	Northern Ireland	3	Both	27	Age-standardized	682	Caries of permanent teeth	3	Rate	1990	2021	2.88837	10.9838	-3.90021
323	6	Incidence	4643	Aguascalientes	3	Both	27	Age-standardized	682	Caries of permanent teeth	3	Rate	1990	2021	-0.653176	9.44395	-9.13833
324	6	Incidence	4864	Nagaland	3	Both	27	Age-standardized	682	Caries of permanent teeth	3	Rate	1990	2021	3.84032	13.7411	-4.04724
325	6	Incidence	557	North Dakota	3	Both	27	Age-standardized	682	Caries of permanent teeth	3	Rate	1990	2021	-5.0659	2.6458	-13.2128
326	6	Incidence	4752	Amazonas	3	Both	27	Age-standardized	682	Caries of permanent teeth	3	Rate	1990	2021	-0.784942	4.89583	-7.15943
327	6	Incidence	535	Idaho	3	Both	27	Age-standardized	682	Caries of permanent teeth	3	Rate	1990	2021	-4.15716	17.8043	-20.8536
328	6	Incidence	4731	South Kalimantan	3	Both	27	Age-standardized	682	Caries of permanent teeth	3	Rate	1990	2021	-0.114189	6.85177	-5.66971
329	6	Incidence	4872	Tripura	3	Both	27	Age-standardized	682	Caries of permanent teeth	3	Rate	1990	2021	1.15532	7.11281	-4.61842
330	6	Incidence	523	Alabama	3	Both	27	Age-standardized	682	Caries of permanent teeth	3	Rate	1990	2021	-4.42486	2.04769	-12.4596
331	6	Incidence	4870	Tamil Nadu	3	Both	27	Age-standardized	682	Caries of permanent teeth	3	Rate	1990	2021	1.51169	7.0574	-3.70276
332	6	Incidence	540	Kentucky	3	Both	27	Age-standardized	682	Caries of permanent teeth	3	Rate	1990	2021	-4.91109	4.18256	-15.1662
333	6	Incidence	530	Delaware	3	Both	27	Age-standardized	682	Caries of permanent teeth	3	Rate	1990	2021	-4.29617	2.4962	-12.2029
334	6	Incidence	4648	Colima	3	Both	27	Age-standardized	682	Caries of permanent teeth	3	Rate	1990	2021	-1.52463	9.23117	-9.98448
335	6	Incidence	4726	Bali	3	Both	27	Age-standardized	682	Caries of permanent teeth	3	Rate	1990	2021	0.436197	6.13216	-4.52829
336	6	Incidence	4736	Southeast Sulawesi	3	Both	27	Age-standardized	682	Caries of permanent teeth	3	Rate	1990	2021	0.93864	6.51426	-4.13413
337	6	Incidence	567	Utah	3	Both	27	Age-standardized	682	Caries of permanent teeth	3	Rate	1990	2021	-4.75139	2.01207	-10.8526
338	6	Incidence	4920	Rogaland	3	Both	27	Age-standardized	682	Caries of permanent teeth	3	Rate	1990	2021	2.74546	9.33148	-2.84032
339	6	Incidence	4757	Esp铆rito Santo	3	Both	27	Age-standardized	682	Caries of permanent teeth	3	Rate	1990	2021	-1.87048	5.30712	-9.59988
340	6	Incidence	4709	Aceh	3	Both	27	Age-standardized	682	Caries of permanent teeth	3	Rate	1990	2021	-0.314591	5.11041	-5.91978
341	6	Incidence	4940	Sweden except Stockholm	3	Both	27	Age-standardized	682	Caries of permanent teeth	3	Rate	1990	2021	8.54983	19.4545	0.353019
342	6	Incidence	4762	Mato Grosso	3	Both	27	Age-standardized	682	Caries of permanent teeth	3	Rate	1990	2021	-0.180476	7.39831	-6.79987
343	6	Incidence	35441	Fukui	3	Both	27	Age-standardized	682	Caries of permanent teeth	3	Rate	1990	2021	-12.4356	-2.21924	-21.2158
344	6	Incidence	4851	Gujarat	3	Both	27	Age-standardized	682	Caries of permanent teeth	3	Rate	1990	2021	0.960735	5.87984	-4.34031
345	6	Incidence	533	Georgia	3	Both	27	Age-standardized	682	Caries of permanent teeth	3	Rate	1990	2021	-4.36612	2.92424	-10.6295
346	6	Incidence	4767	Piaui	3	Both	27	Age-standardized	682	Caries of permanent teeth	3	Rate	1990	2021	-0.730537	5.85523	-6.78881
347	6	Incidence	35446	Aichi	3	Both	27	Age-standardized	682	Caries of permanent teeth	3	Rate	1990	2021	-12.6638	-3.58775	-22.9802
348	6	Incidence	545	Michigan	3	Both	27	Age-standardized	682	Caries of permanent teeth	3	Rate	1990	2021	3.76585	10.6824	-2.20134
349	6	Incidence	4670	Tamaulipas	3	Both	27	Age-standardized	682	Caries of permanent teeth	3	Rate	1990	2021	-1.5926	6.52267	-8.68172
350	6	Incidence	4663	Puebla	3	Both	27	Age-standardized	682	Caries of permanent teeth	3	Rate	1990	2021	-1.78875	6.43904	-9.80674
351	6	Incidence	4653	Guanajuato	3	Both	27	Age-standardized	682	Caries of permanent teeth	3	Rate	1990	2021	-3.02356	5.2331	-10.0028
352	6	Incidence	35424	Hokkaid艒	3	Both	27	Age-standardized	682	Caries of permanent teeth	3	Rate	1990	2021	-13.2651	-4.38971	-20.4665
353	6	Incidence	4621	East Midlands	3	Both	27	Age-standardized	682	Caries of permanent teeth	3	Rate	1990	2021	-1.11596	3.2119	-5.27538
354	6	Incidence	555	New York	3	Both	27	Age-standardized	682	Caries of permanent teeth	3	Rate	1990	2021	-4.01767	3.86992	-10.5743
355	6	Incidence	572	Wisconsin	3	Both	27	Age-standardized	682	Caries of permanent teeth	3	Rate	1990	2021	-4.85554	4.1693	-13.4917
356	6	Incidence	550	Nebraska	3	Both	27	Age-standardized	682	Caries of permanent teeth	3	Rate	1990	2021	-5.11334	1.96777	-13.8718
357	6	Incidence	4772	Rio Grande do Sul	3	Both	27	Age-standardized	682	Caries of permanent teeth	3	Rate	1990	2021	0.683677	7.72358	-5.81657
358	6	Incidence	4668	Sonora	3	Both	27	Age-standardized	682	Caries of permanent teeth	3	Rate	1990	2021	-3.01064	4.92138	-10.334
359	6	Incidence	4719	North Kalimantan	3	Both	27	Age-standardized	682	Caries of permanent teeth	3	Rate	1990	2021	-1.30392	3.97103	-8.6954
360	6	Incidence	4658	Michoac谩n de Ocampo	3	Both	27	Age-standardized	682	Caries of permanent teeth	3	Rate	1990	2021	-2.69567	3.65336	-9.5662
361	6	Incidence	4626	South West England	3	Both	27	Age-standardized	682	Caries of permanent teeth	3	Rate	1990	2021	0.985504	3.31613	-0.826597
362	6	Incidence	4856	Karnataka	3	Both	27	Age-standardized	682	Caries of permanent teeth	3	Rate	1990	2021	8.24141	29.1775	-8.44673
363	6	Incidence	4862	Meghalaya	3	Both	27	Age-standardized	682	Caries of permanent teeth	3	Rate	1990	2021	1.70559	6.69328	-3.88798
364	6	Incidence	528	Colorado	3	Both	27	Age-standardized	682	Caries of permanent teeth	3	Rate	1990	2021	-4.1932	4.02968	-11.94
365	6	Incidence	570	Washington	3	Both	27	Age-standardized	682	Caries of permanent teeth	3	Rate	1990	2021	-4.38684	4.13821	-12.0625
366	6	Incidence	543	Maryland	3	Both	27	Age-standardized	682	Caries of permanent teeth	3	Rate	1990	2021	-5.5284	15.7118	-20.3315
367	6	Incidence	4741	West Papua	3	Both	27	Age-standardized	682	Caries of permanent teeth	3	Rate	1990	2021	1.51093	7.59587	-3.73754
368	6	Incidence	538	Iowa	3	Both	27	Age-standardized	682	Caries of permanent teeth	3	Rate	1990	2021	10.5058	20.0117	0.915745
369	6	Incidence	4750	Acre	3	Both	27	Age-standardized	682	Caries of permanent teeth	3	Rate	1990	2021	1.17501	8.65293	-4.77857
370	6	Incidence	526	Arkansas	3	Both	27	Age-standardized	682	Caries of permanent teeth	3	Rate	1990	2021	-4.78247	4.48991	-14.1391
371	6	Incidence	4646	Campeche	3	Both	27	Age-standardized	682	Caries of permanent teeth	3	Rate	1990	2021	4.3548	11.5617	-1.01644
372	6	Incidence	4859	Madhya Pradesh	3	Both	27	Age-standardized	682	Caries of permanent teeth	3	Rate	1990	2021	1.21793	7.32614	-4.31305
373	6	Incidence	4673	Yucat谩n	3	Both	27	Age-standardized	682	Caries of permanent teeth	3	Rate	1990	2021	-2.85158	4.94843	-11.3186
374	6	Incidence	4714	South Sumatra	3	Both	27	Age-standardized	682	Caries of permanent teeth	3	Rate	1990	2021	-0.0614724	6.93896	-6.15437
375	6	Incidence	4841	Andhra Pradesh	3	Both	27	Age-standardized	682	Caries of permanent teeth	3	Rate	1990	2021	0.0869742	5.95884	-5.92849
376	6	Incidence	4868	Rajasthan	3	Both	27	Age-standardized	682	Caries of permanent teeth	3	Rate	1990	2021	1.96939	6.97744	-2.89738
377	6	Incidence	560	Oregon	3	Both	27	Age-standardized	682	Caries of permanent teeth	3	Rate	1990	2021	-4.66627	4.09293	-13.9863
378	6	Incidence	4724	East Java	3	Both	27	Age-standardized	682	Caries of permanent teeth	3	Rate	1990	2021	0.869088	8.39051	-5.54848
379	6	Incidence	4853	Himachal Pradesh	3	Both	27	Age-standardized	682	Caries of permanent teeth	3	Rate	1990	2021	3.46444	10.5952	-2.89902
380	6	Incidence	4734	Central Sulawesi	3	Both	27	Age-standardized	682	Caries of permanent teeth	3	Rate	1990	2021	1.04226	8.36943	-5.30165
381	6	Incidence	35434	Saitama	3	Both	27	Age-standardized	682	Caries of permanent teeth	3	Rate	1990	2021	-13.1919	-5.69235	-22.3594
382	6	Incidence	4755	Cear谩	3	Both	27	Age-standardized	682	Caries of permanent teeth	3	Rate	1990	2021	-0.882891	6.95759	-7.4219
383	6	Incidence	4849	Delhi	3	Both	27	Age-standardized	682	Caries of permanent teeth	3	Rate	1990	2021	0.513313	6.55708	-4.84736
384	6	Incidence	35451	Hy艒go	3	Both	27	Age-standardized	682	Caries of permanent teeth	3	Rate	1990	2021	-13.5403	-5.36588	-21.4369
385	6	Incidence	4729	West Kalimantan	3	Both	27	Age-standardized	682	Caries of permanent teeth	3	Rate	1990	2021	-0.886855	5.63086	-6.27821
386	6	Incidence	4739	Maluku	3	Both	27	Age-standardized	682	Caries of permanent teeth	3	Rate	1990	2021	1.00746	7.7929	-6.89478
387	6	Incidence	4651	Mexico City	3	Both	27	Age-standardized	682	Caries of permanent teeth	3	Rate	1990	2021	-1.11395	5.34737	-7.17702
388	6	Incidence	4765	Paran谩	3	Both	27	Age-standardized	682	Caries of permanent teeth	3	Rate	1990	2021	-1.11397	4.57752	-7.40572
389	6	Incidence	4656	Jalisco	3	Both	27	Age-standardized	682	Caries of permanent teeth	3	Rate	1990	2021	-2.47043	6.64179	-11.982
390	6	Incidence	4712	Riau	3	Both	27	Age-standardized	682	Caries of permanent teeth	3	Rate	1990	2021	-0.67354	6.83273	-7.96886
391	6	Incidence	35449	Ky艒to	3	Both	27	Age-standardized	682	Caries of permanent teeth	3	Rate	1990	2021	-12.108	-4.21605	-21.9622
392	6	Incidence	35444	Gifu	3	Both	27	Age-standardized	682	Caries of permanent teeth	3	Rate	1990	2021	-12.5858	-5.19963	-20.7855
393	6	Incidence	35429	Yamagata	3	Both	27	Age-standardized	682	Caries of permanent teeth	3	Rate	1990	2021	-13.6404	-7.08941	-21.0194
394	6	Incidence	4745		3	Both	27	Age-standardized	682	Caries of permanent teeth	3	Rate	1990	2021	1.05018	3.61888	-1.74282
395	6	Incidence	35427	Miyagi	3	Both	27	Age-standardized	682	Caries of permanent teeth	3	Rate	1990	2021	-12.4549	-3.69548	-19.2881
396	6	Incidence	4661	Nuevo Le贸n	3	Both	27	Age-standardized	682	Caries of permanent teeth	3	Rate	1990	2021	-2.78939	4.28656	-11.0982
397	6	Incidence	4619	North West England	3	Both	27	Age-standardized	682	Caries of permanent teeth	3	Rate	1990	2021	-0.094048	3.54991	-2.98961
398	6	Incidence	4760	Minas Gerais	3	Both	27	Age-standardized	682	Caries of permanent teeth	3	Rate	1990	2021	4.89961	11.8303	-0.792772
399	6	Incidence	4722	Central Java	3	Both	27	Age-standardized	682	Caries of permanent teeth	3	Rate	1990	2021	-0.174164	7.87897	-6.49981
400	6	Incidence	541	Louisiana	3	Both	27	Age-standardized	682	Caries of permanent teeth	3	Rate	1990	2021	-4.08523	17.4263	-21.1816
401	6	Incidence	4717	Bangka-Belitung Islands	3	Both	27	Age-standardized	682	Caries of permanent teeth	3	Rate	1990	2021	1.34209	6.96949	-5.06891
402	6	Incidence	4775	S茫o Paulo	3	Both	27	Age-standardized	682	Caries of permanent teeth	3	Rate	1990	2021	4.89278	11.0717	-1.31101
403	6	Incidence	4753	Amap谩	3	Both	27	Age-standardized	682	Caries of permanent teeth	3	Rate	1990	2021	-0.862761	5.76261	-5.52966
404	6	Incidence	4910	Oslo	3	Both	27	Age-standardized	682	Caries of permanent teeth	3	Rate	1990	2021	0.880024	6.65741	-4.92517
405	6	Incidence	548	Missouri	3	Both	27	Age-standardized	682	Caries of permanent teeth	3	Rate	1990	2021	-5.2995	2.68042	-12.9764
406	6	Incidence	563	South Carolina	3	Both	27	Age-standardized	682	Caries of permanent teeth	3	Rate	1990	2021	-4.66072	4.20097	-13.9415
407	6	Incidence	4649	Chiapas	3	Both	27	Age-standardized	682	Caries of permanent teeth	3	Rate	1990	2021	-2.27671	4.70897	-9.24121
408	6	Incidence	35439	Toyama	3	Both	27	Age-standardized	682	Caries of permanent teeth	3	Rate	1990	2021	-13.8254	-7.72516	-20.2023
409	6	Incidence	4624	Greater London	3	Both	27	Age-standardized	682	Caries of permanent teeth	3	Rate	1990	2021	-1.08704	3.03039	-4.58014
410	6	Incidence	558	Ohio	3	Both	27	Age-standardized	682	Caries of permanent teeth	3	Rate	1990	2021	-4.28721	4.2944	-11.3263
411	6	Incidence	4770	Rond么nia	3	Both	27	Age-standardized	682	Caries of permanent teeth	3	Rate	1990	2021	-1.1243	5.96137	-7.48978
412	6	Incidence	4727	West Nusa Tenggara	3	Both	27	Age-standardized	682	Caries of permanent teeth	3	Rate	1990	2021	-0.0976092	6.42556	-6.23724
413	6	Incidence	4732	East Kalimantan	3	Both	27	Age-standardized	682	Caries of permanent teeth	3	Rate	1990	2021	0.651595	8.44116	-6.83775
414	6	Incidence	4666	San Luis Potos铆	3	Both	27	Age-standardized	682	Caries of permanent teeth	3	Rate	1990	2021	-2.15396	5.13303	-9.81803
415	6	Incidence	35432	Tochigi	3	Both	27	Age-standardized	682	Caries of permanent teeth	3	Rate	1990	2021	-13.4472	-5.86959	-21.4606
416	6	Incidence	565	Tennessee	3	Both	27	Age-standardized	682	Caries of permanent teeth	3	Rate	1990	2021	8.46459	19.0894	-1.4071
417	6	Incidence	35447	Mie	3	Both	27	Age-standardized	682	Caries of permanent teeth	3	Rate	1990	2021	-13.7092	-6.89555	-21.5431
418	6	Incidence	553	New Jersey	3	Both	27	Age-standardized	682	Caries of permanent teeth	3	Rate	1990	2021	-4.51637	4.48532	-11.3574
419	6	Incidence	4844	Bihar	3	Both	27	Age-standardized	682	Caries of permanent teeth	3	Rate	1990	2021	0.460781	5.05598	-4.46932
420	6	Incidence	4873	Uttar Pradesh	3	Both	27	Age-standardized	682	Caries of permanent teeth	3	Rate	1990	2021	1.72898	6.69075	-4.28061
421	6	Incidence	4871	Telangana	3	Both	27	Age-standardized	682	Caries of permanent teeth	3	Rate	1990	2021	2.42803	8.616	-3.93033
422	6	Incidence	4865	Odisha	3	Both	27	Age-standardized	682	Caries of permanent teeth	3	Rate	1990	2021	0.829759	6.81791	-3.79751
423	6	Incidence	4737	Gorontalo	3	Both	27	Age-standardized	682	Caries of permanent teeth	3	Rate	1990	2021	1.36371	10.7653	-5.16637
424	6	Incidence	4644	Baja California	3	Both	27	Age-standardized	682	Caries of permanent teeth	3	Rate	1990	2021	-8.80513	3.00051	-19.3389
425	6	Incidence	536	Illinois	3	Both	27	Age-standardized	682	Caries of permanent teeth	3	Rate	1990	2021	-4.5094	2.34604	-12.4301
426	6	Incidence	568	Vermont	3	Both	27	Age-standardized	682	Caries of permanent teeth	3	Rate	1990	2021	-4.88446	3.72196	-12.9229
427	6	Incidence	4852	Haryana	3	Both	27	Age-standardized	682	Caries of permanent teeth	3	Rate	1990	2021	2.68818	8.74896	-2.54473
428	6	Incidence	531	District of Columbia	3	Both	27	Age-standardized	682	Caries of permanent teeth	3	Rate	1990	2021	-4.64722	3.62727	-12.593
429	6	Incidence	4710	North Sumatra	3	Both	27	Age-standardized	682	Caries of permanent teeth	3	Rate	1990	2021	0.530484	5.69656	-5.58766
430	6	Incidence	4763	Par谩	3	Both	27	Age-standardized	682	Caries of permanent teeth	3	Rate	1990	2021	0.279923	6.78483	-5.5977
431	6	Incidence	4768	Rio de Janeiro	3	Both	27	Age-standardized	682	Caries of permanent teeth	3	Rate	1990	2021	0.433768	5.8666	-4.9953
432	6	Incidence	4671	Tlaxcala	3	Both	27	Age-standardized	682	Caries of permanent teeth	3	Rate	1990	2021	-2.60618	5.58443	-9.65989
433	6	Incidence	35437	Kanagawa	3	Both	27	Age-standardized	682	Caries of permanent teeth	3	Rate	1990	2021	-12.7822	-7.02921	-19.6006
434	6	Incidence	4654	Guerrero	3	Both	27	Age-standardized	682	Caries of permanent teeth	3	Rate	1990	2021	-1.46256	6.48619	-11.3696
435	6	Incidence	4664	Quer茅taro	3	Both	27	Age-standardized	682	Caries of permanent teeth	3	Rate	1990	2021	-4.10668	5.36001	-12.7422
436	6	Incidence	4944	Stockholm	3	Both	27	Age-standardized	682	Caries of permanent teeth	3	Rate	1990	2021	39.4235	76.2853	19.1754
437	6	Incidence	35435	Chiba	3	Both	27	Age-standardized	682	Caries of permanent teeth	3	Rate	1990	2021	-14.248	-7.72235	-21.1805
438	6	Incidence	35425	Aomori	3	Both	27	Age-standardized	682	Caries of permanent teeth	3	Rate	1990	2021	-14.2739	-6.5754	-21.5382
439	6	Incidence	4773	Santa Catarina	3	Both	27	Age-standardized	682	Caries of permanent teeth	3	Rate	1990	2021	-0.302668	4.96521	-4.97776
440	6	Incidence	4751	Alagoas	3	Both	27	Age-standardized	682	Caries of permanent teeth	3	Rate	1990	2021	1.05438	8.18334	-6.62366
441	6	Incidence	4857	Kerala	3	Both	27	Age-standardized	682	Caries of permanent teeth	3	Rate	1990	2021	3.48734	13.1895	-5.68723
442	6	Incidence	35442	Yamanashi	3	Both	27	Age-standardized	682	Caries of permanent teeth	3	Rate	1990	2021	-13.0304	-7.00227	-21.4334
443	6	Incidence	4720	Jakarta	3	Both	27	Age-standardized	682	Caries of permanent teeth	3	Rate	1990	2021	0.741382	5.64946	-5.46974
444	6	Incidence	4715	Bengkulu	3	Both	27	Age-standardized	682	Caries of permanent teeth	3	Rate	1990	2021	1.045	7.31148	-4.51909
445	6	Incidence	4659	Morelos	3	Both	27	Age-standardized	682	Caries of permanent teeth	3	Rate	1990	2021	1.06628	8.8908	-6.09925
446	6	Incidence	4742	Papua	3	Both	27	Age-standardized	682	Caries of permanent teeth	3	Rate	1990	2021	-1.07292	6.20979	-6.34405
447	6	Incidence	573	Wyoming	3	Both	27	Age-standardized	682	Caries of permanent teeth	3	Rate	1990	2021	-5.02573	16.3857	-20.5362
448	6	Incidence	4923	M酶re og Romsdal	3	Both	27	Age-standardized	682	Caries of permanent teeth	3	Rate	1990	2021	1.54798	7.94258	-4.52407
449	6	Incidence	4863	Mizoram	3	Both	27	Age-standardized	682	Caries of permanent teeth	3	Rate	1990	2021	1.90931	6.81514	-3.24267
450	6	Incidence	4758	Goi谩s	3	Both	27	Age-standardized	682	Caries of permanent teeth	3	Rate	1990	2021	-0.503421	6.47878	-7.21399
451	6	Incidence	4842	Arunachal Pradesh	3	Both	27	Age-standardized	682	Caries of permanent teeth	3	Rate	1990	2021	2.9279	9.64322	-2.75584
452	6	Incidence	4869	Sikkim	3	Both	27	Age-standardized	682	Caries of permanent teeth	3	Rate	1990	2021	2.56937	8.22699	-4.4569
453	6	Incidence	4761	Mato Grosso do Sul	3	Both	27	Age-standardized	682	Caries of permanent teeth	3	Rate	1990	2021	-0.521841	5.89942	-6.34751
454	6	Incidence	4725	Banten	3	Both	27	Age-standardized	682	Caries of permanent teeth	3	Rate	1990	2021	-0.199017	7.0805	-6.55659
455	6	Incidence	4766	Pernambuco	3	Both	27	Age-standardized	682	Caries of permanent teeth	3	Rate	1990	2021	1.7212	9.69613	-3.86702
456	6	Incidence	35445	Shizuoka	3	Both	27	Age-standardized	682	Caries of permanent teeth	3	Rate	1990	2021	-12.6124	-5.46059	-20.1927
457	6	Incidence	35452	Nara	3	Both	27	Age-standardized	682	Caries of permanent teeth	3	Rate	1990	2021	-12.9261	-4.90137	-19.9429
458	6	Incidence	4854	Jammu & Kashmir and Ladakh	3	Both	27	Age-standardized	682	Caries of permanent teeth	3	Rate	1990	2021	2.62698	9.00919	-2.538
459	6	Incidence	4756	Distrito Federal	3	Both	27	Age-standardized	682	Caries of permanent teeth	3	Rate	1990	2021	0.789729	9.26586	-6.67553
460	6	Incidence	4850	Goa	3	Both	27	Age-standardized	682	Caries of permanent teeth	3	Rate	1990	2021	1.79302	8.0538	-4.37147
461	6	Incidence	35428	Akita	3	Both	27	Age-standardized	682	Caries of permanent teeth	3	Rate	1990	2021	-13.5491	-5.58411	-20.5331
462	6	Incidence	35433	Gunma	3	Both	27	Age-standardized	682	Caries of permanent teeth	3	Rate	1990	2021	-14.1101	-6.15555	-22.5566
463	6	Incidence	4860	Maharashtra	3	Both	27	Age-standardized	682	Caries of permanent teeth	3	Rate	1990	2021	2.70793	8.33678	-2.73413
464	6	Incidence	4730	Central Kalimantan	3	Both	27	Age-standardized	682	Caries of permanent teeth	3	Rate	1990	2021	0.106138	5.66556	-6.33485
465	6	Incidence	4874	Uttarakhand	3	Both	27	Age-standardized	682	Caries of permanent teeth	3	Rate	1990	2021	2.34194	7.2223	-2.61178
466	6	Incidence	35448	Shiga	3	Both	27	Age-standardized	682	Caries of permanent teeth	3	Rate	1990	2021	-13.053	-3.83307	-22.0251
467	6	Incidence	35450	艑saka	3	Both	27	Age-standardized	682	Caries of permanent teeth	3	Rate	1990	2021	-12.7667	-4.86676	-24.8267
468	6	Incidence	35440	Ishikawa	3	Both	27	Age-standardized	682	Caries of permanent teeth	3	Rate	1990	2021	-12.0554	-2.40073	-27.0772
469	6	Incidence	4867	Punjab	3	Both	27	Age-standardized	682	Caries of permanent teeth	3	Rate	1990	2021	4.10022	9.22567	-1.77779
470	6	Incidence	35438	Niigata	3	Both	27	Age-standardized	682	Caries of permanent teeth	3	Rate	1990	2021	-12.6259	-3.85144	-22.0781
471	6	Incidence	35430	Fukushima	3	Both	27	Age-standardized	682	Caries of permanent teeth	3	Rate	1990	2021	-27.545	-14.5725	-39.4316
472	6	Incidence	35456	Okayama	3	Both	27	Age-standardized	682	Caries of permanent teeth	3	Rate	1990	2021	-12.6863	-6.45892	-19.4304
473	6	Incidence	35461	Ehime	3	Both	27	Age-standardized	682	Caries of permanent teeth	3	Rate	1990	2021	-14.1658	-6.62096	-21.5834
474	6	Incidence	35426	Iwate	3	Both	27	Age-standardized	682	Caries of permanent teeth	3	Rate	1990	2021	-27.5653	-15.6197	-39.4939
475	6	Incidence	35454	Tottori	3	Both	27	Age-standardized	682	Caries of permanent teeth	3	Rate	1990	2021	-11.9987	-4.59296	-20.5238
476	6	Incidence	35443	Nagano	3	Both	27	Age-standardized	682	Caries of permanent teeth	3	Rate	1990	2021	-13.385	-4.59196	-23.8004
477	6	Incidence	35436	T艒ky艒	3	Both	27	Age-standardized	682	Caries of permanent teeth	3	Rate	1990	2021	-38.5148	-20.8064	-52.2795
478	6	Incidence	35466	Kumamoto	3	Both	27	Age-standardized	682	Caries of permanent teeth	3	Rate	1990	2021	-11.7407	-5.57227	-19.539
479	6	Incidence	4926	Nordland	3	Both	27	Age-standardized	682	Caries of permanent teeth	3	Rate	1990	2021	1.27012	7.66258	-5.35353
480	6	Incidence	35459	Tokushima	3	Both	27	Age-standardized	682	Caries of permanent teeth	3	Rate	1990	2021	-13.5939	-6.69966	-20.2856
481	6	Incidence	35453	Wakayama	3	Both	27	Age-standardized	682	Caries of permanent teeth	3	Rate	1990	2021	-12.9664	-1.953	-20.9991
482	6	Incidence	4855	Jharkhand	3	Both	27	Age-standardized	682	Caries of permanent teeth	3	Rate	1990	2021	3.4402	10.045	-3.02809
483	6	Incidence	35464	Saga	3	Both	27	Age-standardized	682	Caries of permanent teeth	3	Rate	1990	2021	-37.2036	-20.5399	-51.0009
484	6	Incidence	4861	Manipur	3	Both	27	Age-standardized	682	Caries of permanent teeth	3	Rate	1990	2021	1.2498	5.43904	-3.25548
485	6	Incidence	35469	Kagoshima	3	Both	27	Age-standardized	682	Caries of permanent teeth	3	Rate	1990	2021	-12.2765	-3.05895	-21.4945
486	6	Incidence	35431	Ibaraki	3	Both	27	Age-standardized	682	Caries of permanent teeth	3	Rate	1990	2021	-13.6418	-4.54242	-22.1268
487	6	Incidence	35457	Hiroshima	3	Both	27	Age-standardized	682	Caries of permanent teeth	3	Rate	1990	2021	-17.8994	-6.46984	-28.7193
488	6	Incidence	35462	K艒chi	3	Both	27	Age-standardized	682	Caries of permanent teeth	3	Rate	1990	2021	-12.1855	-4.74013	-19.905
489	6	Incidence	35455	Shimane	3	Both	27	Age-standardized	682	Caries of permanent teeth	3	Rate	1990	2021	-12.9086	-3.46808	-22.9084
490	6	Incidence	35467	艑ita	3	Both	27	Age-standardized	682	Caries of permanent teeth	3	Rate	1990	2021	-12.1042	-4.24219	-23.6425
491	6	Incidence	35460	Kagawa	3	Both	27	Age-standardized	682	Caries of permanent teeth	3	Rate	1990	2021	-13.6098	-6.67632	-20.6152
492	6	Incidence	35630	Kilifi	3	Both	27	Age-standardized	682	Caries of permanent teeth	3	Rate	1990	2021	-0.810653	5.76542	-6.97389
493	6	Incidence	35470	Okinawa	3	Both	27	Age-standardized	682	Caries of permanent teeth	3	Rate	1990	2021	-13.1444	-4.68575	-20.4075
494	6	Incidence	35635	Kwale	3	Both	27	Age-standardized	682	Caries of permanent teeth	3	Rate	1990	2021	0.801504	8.2248	-5.76555
495	6	Incidence	35465	Nagasaki	3	Both	27	Age-standardized	682	Caries of permanent teeth	3	Rate	1990	2021	-12.7836	-6.15242	-21.625
496	6	Incidence	35640	Mandera	3	Both	27	Age-standardized	682	Caries of permanent teeth	3	Rate	1990	2021	-17.4061	-4.77758	-28.7043
497	6	Incidence	35618	Bomet	3	Both	27	Age-standardized	682	Caries of permanent teeth	3	Rate	1990	2021	0.0199904	7.33218	-5.29677
498	6	Incidence	35623	Garissa	3	Both	27	Age-standardized	682	Caries of permanent teeth	3	Rate	1990	2021	1.1222	9.58296	-5.51648
499	6	Incidence	35458	Yamaguchi	3	Both	27	Age-standardized	682	Caries of permanent teeth	3	Rate	1990	2021	-37.3023	-19.9753	-51.633
500	6	Incidence	35662	Wajir	3	Both	27	Age-standardized	682	Caries of permanent teeth	3	Rate	1990	2021	-0.195117	6.26876	-5.95582
501	6	Incidence	35628	Kericho	3	Both	27	Age-standardized	682	Caries of permanent teeth	3	Rate	1990	2021	0.724362	7.09524	-4.76975
502	6	Incidence	35633	Kisumu	3	Both	27	Age-standardized	682	Caries of permanent teeth	3	Rate	1990	2021	0.747357	6.47124	-4.86648
503	6	Incidence	35463	Fukuoka	3	Both	27	Age-standardized	682	Caries of permanent teeth	3	Rate	1990	2021	-12.4366	-5.35353	-22.0892
504	6	Incidence	35645	Murang'a	3	Both	27	Age-standardized	682	Caries of permanent teeth	3	Rate	1990	2021	-18.0582	-6.65897	-29.3519
505	6	Incidence	35650	Nyamira	3	Both	27	Age-standardized	682	Caries of permanent teeth	3	Rate	1990	2021	-3.63279	3.5805	-11.4203
506	6	Incidence	35660	Uasin Gishu	3	Both	27	Age-standardized	682	Caries of permanent teeth	3	Rate	1990	2021	0.550321	6.24654	-6.52959
507	6	Incidence	35638	Machakos	3	Both	27	Age-standardized	682	Caries of permanent teeth	3	Rate	1990	2021	-0.875888	6.65745	-6.16541
508	6	Incidence	35468	Miyazaki	3	Both	27	Age-standardized	682	Caries of permanent teeth	3	Rate	1990	2021	-12.381	-2.07423	-20.7349
509	6	Incidence	35643	Migori	3	Both	27	Age-standardized	682	Caries of permanent teeth	3	Rate	1990	2021	-3.86288	3.409	-10.5094
510	6	Incidence	35621	Elgeyo-Marakwet	3	Both	27	Age-standardized	682	Caries of permanent teeth	3	Rate	1990	2021	-0.0516828	7.3134	-6.42927
511	6	Incidence	35655	Taita Taveta	3	Both	27	Age-standardized	682	Caries of permanent teeth	3	Rate	1990	2021	-4.26827	2.50872	-11.7962
512	6	Incidence	35648	Nandi	3	Both	27	Age-standardized	682	Caries of permanent teeth	3	Rate	1990	2021	-4.06875	3.40165	-12.1839
513	6	Incidence	35631	Kirinyaga	3	Both	27	Age-standardized	682	Caries of permanent teeth	3	Rate	1990	2021	0.568092	6.09996	-5.42069
514	6	Incidence	44536	Commonwealth Middle Income	3	Both	27	Age-standardized	682	Caries of permanent teeth	3	Rate	1990	2021	0.945876	3.0593	-1.10312
515	6	Incidence	35617	Baringo	3	Both	27	Age-standardized	682	Caries of permanent teeth	3	Rate	1990	2021	-0.757295	5.69634	-6.31388
516	6	Incidence	35636	Laikipia	3	Both	27	Age-standardized	682	Caries of permanent teeth	3	Rate	1990	2021	-0.0328152	6.36081	-5.91872
517	6	Incidence	35626	Kajiado	3	Both	27	Age-standardized	682	Caries of permanent teeth	3	Rate	1990	2021	-0.0714599	6.65724	-5.63255
518	6	Incidence	44559	Africa	3	Both	27	Age-standardized	682	Caries of permanent teeth	3	Rate	1990	2021	0.263366	1.90204	-1.49008
519	6	Incidence	35619	Bungoma	3	Both	27	Age-standardized	682	Caries of permanent teeth	3	Rate	1990	2021	-0.627476	5.42312	-5.83293
520	6	Incidence	35624	Homa Bay	3	Both	27	Age-standardized	682	Caries of permanent teeth	3	Rate	1990	2021	-0.582389	6.12902	-6.50059
521	6	Incidence	35641	Marsabit	3	Both	27	Age-standardized	682	Caries of permanent teeth	3	Rate	1990	2021	0.309158	6.73471	-6.07044
522	6	Incidence	35653	Samburu	3	Both	27	Age-standardized	682	Caries of permanent teeth	3	Rate	1990	2021	-3.49189	3.91844	-11.963
523	6	Incidence	35634	Kitui	3	Both	27	Age-standardized	682	Caries of permanent teeth	3	Rate	1990	2021	-0.257454	6.16465	-6.96234
524	6	Incidence	44534	Commonwealth	3	Both	27	Age-standardized	682	Caries of permanent teeth	3	Rate	1990	2021	1.22027	3.11023	-0.733621
525	6	Incidence	44564	Region of the Americas	3	Both	27	Age-standardized	682	Caries of permanent teeth	3	Rate	1990	2021	-0.763524	1.26605	-2.61616
526	6	Incidence	35658	Trans Nzoia	3	Both	27	Age-standardized	682	Caries of permanent teeth	3	Rate	1990	2021	-0.190585	5.27358	-5.71077
527	6	Incidence	35663	West Pokot	3	Both	27	Age-standardized	682	Caries of permanent teeth	3	Rate	1990	2021	0.0464922	6.29203	-5.29355
528	6	Incidence	44575	World Bank High Income	3	Both	27	Age-standardized	682	Caries of permanent teeth	3	Rate	1990	2021	-1.1547	0.953619	-2.98979
529	6	Incidence	44635	High SDI	3	Both	27	Age-standardized	682	Caries of permanent teeth	3	Rate	1990	2021	-1.19488	1.17687	-3.22305
530	6	Incidence	44644	Northumberland	3	Both	27	Age-standardized	682	Caries of permanent teeth	3	Rate	1990	2021	1.65061	8.10138	-5.51912
531	6	Incidence	35629	Kiambu	3	Both	27	Age-standardized	682	Caries of permanent teeth	3	Rate	1990	2021	0.665226	8.94693	-6.1575
532	6	Incidence	35651	Nyandarua	3	Both	27	Age-standardized	682	Caries of permanent teeth	3	Rate	1990	2021	-0.412788	6.66892	-6.51584
533	6	Incidence	35646	Nairobi	3	Both	27	Age-standardized	682	Caries of permanent teeth	3	Rate	1990	2021	3.9572	15.2261	-7.04828
534	6	Incidence	44642	Nordic Region	3	Both	27	Age-standardized	682	Caries of permanent teeth	3	Rate	1990	2021	7.87243	12.1885	3.97417
535	6	Incidence	44562	Europe	3	Both	27	Age-standardized	682	Caries of permanent teeth	3	Rate	1990	2021	0.558264	2.67883	-1.56094
536	6	Incidence	44567	Eastern Mediterranean Region	3	Both	27	Age-standardized	682	Caries of permanent teeth	3	Rate	1990	2021	-0.232858	2.43668	-2.71427
537	6	Incidence	44649	County Durham	3	Both	27	Age-standardized	682	Caries of permanent teeth	3	Rate	1990	2021	2.18512	8.78278	-3.50602
538	6	Incidence	35661	Vihiga	3	Both	27	Age-standardized	682	Caries of permanent teeth	3	Rate	1990	2021	-0.566641	9.5609	-6.98307
539	6	Incidence	44586	G20	3	Both	27	Age-standardized	682	Caries of permanent teeth	3	Rate	1990	2021	8.71816	11.5069	6.28431
540	6	Incidence	44654	Hartlepool	3	Both	27	Age-standardized	682	Caries of permanent teeth	3	Rate	1990	2021	1.71978	7.17934	-4.13991
541	6	Incidence	35622	Embu	3	Both	27	Age-standardized	682	Caries of permanent teeth	3	Rate	1990	2021	-0.466067	5.56315	-6.70932
542	6	Incidence	35639	Makueni	3	Both	27	Age-standardized	682	Caries of permanent teeth	3	Rate	1990	2021	0.0646846	7.09243	-5.62985
543	6	Incidence	35656	Tana River	3	Both	27	Age-standardized	682	Caries of permanent teeth	3	Rate	1990	2021	0.659487	8.08056	-6.10225
544	6	Incidence	35644	Mombasa	3	Both	27	Age-standardized	682	Caries of permanent teeth	3	Rate	1990	2021	0.0961248	6.2792	-4.89174
545	6	Incidence	44647	North Tyneside	3	Both	27	Age-standardized	682	Caries of permanent teeth	3	Rate	1990	2021	2.19436	8.71677	-2.84871
546	6	Incidence	35632	Kisii	3	Both	27	Age-standardized	682	Caries of permanent teeth	3	Rate	1990	2021	0.0452644	5.85172	-7.18659
547	6	Incidence	44659	Sefton	3	Both	27	Age-standardized	682	Caries of permanent teeth	3	Rate	1990	2021	2.55286	7.7969	-2.6283
548	6	Incidence	44591	World Bank Income Levels	3	Both	27	Age-standardized	682	Caries of permanent teeth	3	Rate	1990	2021	6.00544	7.8566	4.31313
549	6	Incidence	35627	Kakamega	3	Both	27	Age-standardized	682	Caries of permanent teeth	3	Rate	1990	2021	-1.07574	7.58662	-8.80311
550	6	Incidence	44537	Commonwealth Low Income	3	Both	27	Age-standardized	682	Caries of permanent teeth	3	Rate	1990	2021	2.97591	7.52172	-1.68624
551	6	Incidence	35649	Narok	3	Both	27	Age-standardized	682	Caries of permanent teeth	3	Rate	1990	2021	-0.866283	4.28629	-6.38273
552	6	Incidence	35637	Lamu	3	Both	27	Age-standardized	682	Caries of permanent teeth	3	Rate	1990	2021	-0.0904137	6.42289	-5.79145
553	6	Incidence	35659	Turkana	3	Both	27	Age-standardized	682	Caries of permanent teeth	3	Rate	1990	2021	-3.52048	4.26565	-10.1992
554	6	Incidence	44638	North America	3	Both	27	Age-standardized	682	Caries of permanent teeth	3	Rate	1990	2021	-2.98383	0.176579	-6.0259
555	6	Incidence	44669	Wigan	3	Both	27	Age-standardized	682	Caries of permanent teeth	3	Rate	1990	2021	-3.62266	7.60469	-12.8333
556	6	Incidence	44664	Bury	3	Both	27	Age-standardized	682	Caries of permanent teeth	3	Rate	1990	2021	0.89259	8.50272	-6.71346
557	6	Incidence	44652	South Tyneside	3	Both	27	Age-standardized	682	Caries of permanent teeth	3	Rate	1990	2021	2.55774	8.25107	-3.47463
558	6	Incidence	44578	World Bank Low Income	3	Both	27	Age-standardized	682	Caries of permanent teeth	3	Rate	1990	2021	2.82353	4.64975	1.16488
559	6	Incidence	44657	Trafford	3	Both	27	Age-standardized	682	Caries of permanent teeth	3	Rate	1990	2021	2.76928	8.37713	-2.13808
560	6	Incidence	35625	Isiolo	3	Both	27	Age-standardized	682	Caries of permanent teeth	3	Rate	1990	2021	0.612312	9.04534	-5.84991
561	6	Incidence	44560	America	3	Both	27	Age-standardized	682	Caries of permanent teeth	3	Rate	1990	2021	-0.763524	1.26605	-2.61616
562	6	Incidence	35642	Meru	3	Both	27	Age-standardized	682	Caries of permanent teeth	3	Rate	1990	2021	-3.49165	4.08586	-11.4555
563	6	Incidence	44676	Blackpool	3	Both	27	Age-standardized	682	Caries of permanent teeth	3	Rate	1990	2021	1.53086	7.279	-4.78906
564	6	Incidence	35620	Busia	3	Both	27	Age-standardized	682	Caries of permanent teeth	3	Rate	1990	2021	-0.28058	8.19651	-7.02294
565	6	Incidence	44565	South-East Asia Region	3	Both	27	Age-standardized	682	Caries of permanent teeth	3	Rate	1990	2021	1.85196	4.14801	-0.0839625
566	6	Incidence	35647	Nakuru	3	Both	27	Age-standardized	682	Caries of permanent teeth	3	Rate	1990	2021	-30.1488	-14.3801	-42.5983
567	6	Incidence	44535	Commonwealth High Income	3	Both	27	Age-standardized	682	Caries of permanent teeth	3	Rate	1990	2021	1.62015	4.38952	-1.01835
568	6	Incidence	35654	Siaya	3	Both	27	Age-standardized	682	Caries of permanent teeth	3	Rate	1990	2021	-4.19537	4.04449	-10.6803
569	6	Incidence	44645	Stockton-on-Tees	3	Both	27	Age-standardized	682	Caries of permanent teeth	3	Rate	1990	2021	1.97258	8.80704	-3.51008
570	6	Incidence	44662	Bolton	3	Both	27	Age-standardized	682	Caries of permanent teeth	3	Rate	1990	2021	1.54195	7.89727	-3.97223
571	6	Incidence	44636	Low-middle SDI	3	Both	27	Age-standardized	682	Caries of permanent teeth	3	Rate	1990	2021	0.911878	2.63487	-1.18559
572	6	Incidence	44686	Leeds	3	Both	27	Age-standardized	682	Caries of permanent teeth	3	Rate	1990	2021	1.53957	7.82671	-4.13505
573	6	Incidence	44576	World Bank Upper Middle Income	3	Both	27	Age-standardized	682	Caries of permanent teeth	3	Rate	1990	2021	15.3316	20.7925	11.0833
574	6	Incidence	44691	Kingston upon Hull, City of	3	Both	27	Age-standardized	682	Caries of permanent teeth	3	Rate	1990	2021	2.15199	8.41818	-3.0569
575	6	Incidence	44563	African Region	3	Both	27	Age-standardized	682	Caries of permanent teeth	3	Rate	1990	2021	0.486717	2.04149	-1.00498
576	6	Incidence	44696	Rutland	3	Both	27	Age-standardized	682	Caries of permanent teeth	3	Rate	1990	2021	1.88501	9.22495	-4.08467
577	6	Incidence	44650	Gateshead	3	Both	27	Age-standardized	682	Caries of permanent teeth	3	Rate	1990	2021	2.63473	8.35261	-2.58269
578	6	Incidence	44672	Tameside	3	Both	27	Age-standardized	682	Caries of permanent teeth	3	Rate	1990	2021	3.84589	10.2104	-2.35283
579	6	Incidence	44681	North East Lincolnshire	3	Both	27	Age-standardized	682	Caries of permanent teeth	3	Rate	1990	2021	1.07883	7.11567	-4.8974
580	6	Incidence	35652	Nyeri	3	Both	27	Age-standardized	682	Caries of permanent teeth	3	Rate	1990	2021	4.12898	11.8519	-3.03989
581	6	Incidence	44643	Darlington	3	Both	27	Age-standardized	682	Caries of permanent teeth	3	Rate	1990	2021	2.2603	7.85238	-4.7742
582	6	Incidence	44708	Dudley	3	Both	27	Age-standardized	682	Caries of permanent teeth	3	Rate	1990	2021	2.61581	9.42461	-2.54128
583	6	Incidence	44684	Bradford	3	Both	27	Age-standardized	682	Caries of permanent teeth	3	Rate	1990	2021	-8.60197	11.5421	-23.7946
584	6	Incidence	44568	Western Pacific Region	3	Both	27	Age-standardized	682	Caries of permanent teeth	3	Rate	1990	2021	21.2978	30.2129	15.3814
585	6	Incidence	44587	African Union	3	Both	27	Age-standardized	682	Caries of permanent teeth	3	Rate	1990	2021	0.263366	1.90204	-1.49008
586	6	Incidence	44667	Oldham	3	Both	27	Age-standardized	682	Caries of permanent teeth	3	Rate	1990	2021	3.87296	10.8468	-2.06926
587	6	Incidence	44655	Cheshire East	3	Both	27	Age-standardized	682	Caries of permanent teeth	3	Rate	1990	2021	2.41107	8.92423	-4.12573
588	6	Incidence	44713	Wolverhampton	3	Both	27	Age-standardized	682	Caries of permanent teeth	3	Rate	1990	2021	1.71785	8.83929	-4.11697
589	6	Incidence	44701	Leicester	3	Both	27	Age-standardized	682	Caries of permanent teeth	3	Rate	1990	2021	1.4611	8.04383	-3.51499
590	6	Incidence	44538	Other Union Territories	3	Both	27	Age-standardized	682	Caries of permanent teeth	3	Rate	1990	2021	1.49371	7.74487	-4.0123
591	6	Incidence	44674	Blackburn with Darwen	3	Both	27	Age-standardized	682	Caries of permanent teeth	3	Rate	1990	2021	2.47436	7.72064	-2.86354
592	6	Incidence	35657	Tharaka Nithi	3	Both	27	Age-standardized	682	Caries of permanent teeth	3	Rate	1990	2021	0.0700478	5.8292	-4.85316
593	6	Incidence	44660	Lancashire	3	Both	27	Age-standardized	682	Caries of permanent teeth	3	Rate	1990	2021	2.21209	8.84719	-3.81444
594	6	Incidence	44648	Redcar and Cleveland	3	Both	27	Age-standardized	682	Caries of permanent teeth	3	Rate	1990	2021	2.10229	9.27533	-3.74959
595	6	Incidence	44634	High-middle SDI	3	Both	27	Age-standardized	682	Caries of permanent teeth	3	Rate	1990	2021	8.25363	12.0037	5.18017
596	6	Incidence	44718	Suffolk	3	Both	27	Age-standardized	682	Caries of permanent teeth	3	Rate	1990	2021	-6.82023	5.1165	-18.1457
597	6	Incidence	44711	Stoke-on-Trent	3	Both	27	Age-standardized	682	Caries of permanent teeth	3	Rate	1990	2021	2.88267	8.55417	-3.07722
598	6	Incidence	44584	OECD Countries	3	Both	27	Age-standardized	682	Caries of permanent teeth	3	Rate	1990	2021	-1.82207	0.133714	-3.55361
599	6	Incidence	44706	Worcestershire	3	Both	27	Age-standardized	682	Caries of permanent teeth	3	Rate	1990	2021	0.142659	8.05411	-5.353
600	6	Incidence	44716	Bedford	3	Both	27	Age-standardized	682	Caries of permanent teeth	3	Rate	1990	2021	2.42153	8.98421	-4.71039
601	6	Incidence	44639	Middle SDI	3	Both	27	Age-standardized	682	Caries of permanent teeth	3	Rate	1990	2021	13.2712	17.4082	9.87177
602	6	Incidence	44679	East Riding of Yorkshire	3	Both	27	Age-standardized	682	Caries of permanent teeth	3	Rate	1990	2021	-8.61089	11.1637	-24.9585
603	6	Incidence	44740	Harrow	3	Both	27	Age-standardized	682	Caries of permanent teeth	3	Rate	1990	2021	-12.3171	5.37076	-27.3523
604	6	Incidence	44665	St Helens	3	Both	27	Age-standardized	682	Caries of permanent teeth	3	Rate	1990	2021	0.541061	6.76376	-4.45564
605	6	Incidence	44670	Halton	3	Both	27	Age-standardized	682	Caries of permanent teeth	3	Rate	1990	2021	0.752044	6.03976	-4.53854
606	6	Incidence	44653	Sunderland	3	Both	27	Age-standardized	682	Caries of permanent teeth	3	Rate	1990	2021	1.70525	6.625	-3.34094
607	6	Incidence	44694	Leicestershire	3	Both	27	Age-standardized	682	Caries of permanent teeth	3	Rate	1990	2021	1.71245	8.00427	-3.63955
608	6	Incidence	44658	Cheshire West and Chester	3	Both	27	Age-standardized	682	Caries of permanent teeth	3	Rate	1990	2021	1.63663	7.08082	-3.75823
609	6	Incidence	44677	Manchester	3	Both	27	Age-standardized	682	Caries of permanent teeth	3	Rate	1990	2021	1.76703	8.20862	-4.37924
610	6	Incidence	44723	Norfolk	3	Both	27	Age-standardized	682	Caries of permanent teeth	3	Rate	1990	2021	0.197654	6.71956	-7.214
611	6	Incidence	44745	Greenwich	3	Both	27	Age-standardized	682	Caries of permanent teeth	3	Rate	1990	2021	-12.118	5.53021	-26.9618
612	6	Incidence	44561	Asia	3	Both	27	Age-standardized	682	Caries of permanent teeth	3	Rate	1990	2021	11.5474	15.3017	8.86183
613	6	Incidence	44566	European Region	3	Both	27	Age-standardized	682	Caries of permanent teeth	3	Rate	1990	2021	0.639662	2.49039	-1.33781
614	6	Incidence	44646	Newcastle upon Tyne	3	Both	27	Age-standardized	682	Caries of permanent teeth	3	Rate	1990	2021	2.48866	8.24433	-4.41978
615	6	Incidence	44637	Low SDI	3	Both	27	Age-standardized	682	Caries of permanent teeth	3	Rate	1990	2021	0.358316	1.8571	-1.0961
616	6	Incidence	44663	Wirral	3	Both	27	Age-standardized	682	Caries of permanent teeth	3	Rate	1990	2021	1.47227	7.10202	-3.67169
617	6	Incidence	44728	Kensington and Chelsea	3	Both	27	Age-standardized	682	Caries of permanent teeth	3	Rate	1990	2021	1.53172	10.2198	-5.44417
618	6	Incidence	44577	World Bank Lower Middle Income	3	Both	27	Age-standardized	682	Caries of permanent teeth	3	Rate	1990	2021	0.316264	1.89672	-1.47226
619	6	Incidence	44692	Barnsley	3	Both	27	Age-standardized	682	Caries of permanent teeth	3	Rate	1990	2021	2.04041	7.71976	-2.76688
620	6	Incidence	44738	Kingston upon Thames	3	Both	27	Age-standardized	682	Caries of permanent teeth	3	Rate	1990	2021	1.71755	9.27468	-3.78418
621	6	Incidence	44682	Calderdale	3	Both	27	Age-standardized	682	Caries of permanent teeth	3	Rate	1990	2021	2.54966	8.50224	-3.44236
622	6	Incidence	44697	Derby	3	Both	27	Age-standardized	682	Caries of permanent teeth	3	Rate	1990	2021	-7.80487	11.3523	-22.5609
623	6	Incidence	44704	Solihull	3	Both	27	Age-standardized	682	Caries of permanent teeth	3	Rate	1990	2021	2.48887	9.05126	-5.82547
624	6	Incidence	44687	Sheffield	3	Both	27	Age-standardized	682	Caries of permanent teeth	3	Rate	1990	2021	1.8889	8.54214	-2.82418
625	6	Incidence	44709	Coventry	3	Both	27	Age-standardized	682	Caries of permanent teeth	3	Rate	1990	2021	2.5875	9.85272	-4.15943
626	6	Incidence	44651	Middlesbrough	3	Both	27	Age-standardized	682	Caries of permanent teeth	3	Rate	1990	2021	1.77831	7.89912	-4.22772
627	6	Incidence	44721	Cambridgeshire	3	Both	27	Age-standardized	682	Caries of permanent teeth	3	Rate	1990	2021	1.00051	8.09228	-6.06706
628	6	Incidence	44685	Kirklees	3	Both	27	Age-standardized	682	Caries of permanent teeth	3	Rate	1990	2021	2.4137	9.75889	-3.23544
629	6	Incidence	44743	Hammersmith and Fulham	3	Both	27	Age-standardized	682	Caries of permanent teeth	3	Rate	1990	2021	-11.8004	8.16889	-27.8427
630	6	Incidence	44714	Birmingham	3	Both	27	Age-standardized	682	Caries of permanent teeth	3	Rate	1990	2021	-8.24334	12.7586	-23.682
631	6	Incidence	44726	Luton	3	Both	27	Age-standardized	682	Caries of permanent teeth	3	Rate	1990	2021	0.568269	6.53645	-4.97786
632	6	Incidence	44673	Salford	3	Both	27	Age-standardized	682	Caries of permanent teeth	3	Rate	1990	2021	2.76281	9.26564	-2.83252
633	6	Incidence	44689	Rotherham	3	Both	27	Age-standardized	682	Caries of permanent teeth	3	Rate	1990	2021	1.20332	9.33708	-5.56503
634	6	Incidence	44590	Four World Regions	3	Both	27	Age-standardized	682	Caries of permanent teeth	3	Rate	1990	2021	6.01216	7.86654	4.31647
635	6	Incidence	44733	Redbridge	3	Both	27	Age-standardized	682	Caries of permanent teeth	3	Rate	1990	2021	3.27741	9.23896	-1.53965
636	6	Incidence	44656	Stockport	3	Both	27	Age-standardized	682	Caries of permanent teeth	3	Rate	1990	2021	-3.73014	9.7527	-15.7091
637	6	Incidence	44772	East Sussex	3	Both	27	Age-standardized	682	Caries of permanent teeth	3	Rate	1990	2021	1.77422	7.53921	-3.09545
638	6	Incidence	44755	Haringey	3	Both	27	Age-standardized	682	Caries of permanent teeth	3	Rate	1990	2021	2.68488	9.83095	-3.40423
639	6	Incidence	44750	Lewisham	3	Both	27	Age-standardized	682	Caries of permanent teeth	3	Rate	1990	2021	2.05322	7.25646	-3.17918
640	6	Incidence	44736	Hillingdon	3	Both	27	Age-standardized	682	Caries of permanent teeth	3	Rate	1990	2021	-0.337891	6.37773	-5.53415
641	6	Incidence	44668	Rochdale	3	Both	27	Age-standardized	682	Caries of permanent teeth	3	Rate	1990	2021	-0.612851	4.44274	-6.77177
642	6	Incidence	44699	Nottinghamshire	3	Both	27	Age-standardized	682	Caries of permanent teeth	3	Rate	1990	2021	-12.3121	5.89734	-27.3877
643	6	Incidence	44777	Slough	3	Both	27	Age-standardized	682	Caries of permanent teeth	3	Rate	1990	2021	0.50529	6.09541	-4.85908
644	6	Incidence	44765	Bracknell Forest	3	Both	27	Age-standardized	682	Caries of permanent teeth	3	Rate	1990	2021	2.71669	10.0034	-3.66263
645	6	Incidence	44702	Warwickshire	3	Both	27	Age-standardized	682	Caries of permanent teeth	3	Rate	1990	2021	3.57251	9.37897	-2.13095
646	6	Incidence	44731	Bromley	3	Both	27	Age-standardized	682	Caries of permanent teeth	3	Rate	1990	2021	1.70684	7.80469	-3.09865
647	6	Incidence	44719	Hertfordshire	3	Both	27	Age-standardized	682	Caries of permanent teeth	3	Rate	1990	2021	1.8123	7.36163	-4.95067
648	6	Incidence	44661	Cumbria	3	Both	27	Age-standardized	682	Caries of permanent teeth	3	Rate	1990	2021	-9.34453	10.2619	-24.6341
649	6	Incidence	44707	Staffordshire	3	Both	27	Age-standardized	682	Caries of permanent teeth	3	Rate	1990	2021	0.686426	7.19923	-4.58506
650	6	Incidence	44748	Camden	3	Both	27	Age-standardized	682	Caries of permanent teeth	3	Rate	1990	2021	2.05099	8.83736	-4.56341
651	6	Incidence	44717	Central Bedfordshire	3	Both	27	Age-standardized	682	Caries of permanent teeth	3	Rate	1990	2021	0.0719663	7.81625	-6.68237
652	6	Incidence	44775	Milton Keynes	3	Both	27	Age-standardized	682	Caries of permanent teeth	3	Rate	1990	2021	2.22775	8.14769	-3.91795
653	6	Incidence	44678	North Yorkshire	3	Both	27	Age-standardized	682	Caries of permanent teeth	3	Rate	1990	2021	2.18335	7.85152	-3.42349
654	6	Incidence	44861	Addis Ababa	3	Both	27	Age-standardized	682	Caries of permanent teeth	3	Rate	1990	2021	0.0628301	7.45859	-6.76803
655	6	Incidence	44758	Tower Hamlets	3	Both	27	Age-standardized	682	Caries of permanent teeth	3	Rate	1990	2021	1.47127	8.13355	-5.9747
656	6	Incidence	44666	Warrington	3	Both	27	Age-standardized	682	Caries of permanent teeth	3	Rate	1990	2021	-8.85045	11.9294	-24.8441
657	6	Incidence	44741	Enfield	3	Both	27	Age-standardized	682	Caries of permanent teeth	3	Rate	1990	2021	1.62377	7.60628	-4.47739
658	6	Incidence	44867	West Azarbayejan	3	Both	27	Age-standardized	682	Caries of permanent teeth	3	Rate	1990	2021	0.2324	5.61024	-5.27649
659	6	Incidence	44671	Liverpool	3	Both	27	Age-standardized	682	Caries of permanent teeth	3	Rate	1990	2021	-5.55921	4.87968	-15.1628
660	6	Incidence	44712	Walsall	3	Both	27	Age-standardized	682	Caries of permanent teeth	3	Rate	1990	2021	0.0345337	6.60834	-5.48002
661	6	Incidence	44724	Southend-on-Sea	3	Both	27	Age-standardized	682	Caries of permanent teeth	3	Rate	1990	2021	1.28053	9.17197	-5.26215
662	6	Incidence	44695	Lincolnshire	3	Both	27	Age-standardized	682	Caries of permanent teeth	3	Rate	1990	2021	2.35088	9.66806	-4.23599
663	6	Incidence	44753	Newham	3	Both	27	Age-standardized	682	Caries of permanent teeth	3	Rate	1990	2021	0.619229	7.30563	-4.9728
664	6	Incidence	44792	Plymouth	3	Both	27	Age-standardized	682	Caries of permanent teeth	3	Rate	1990	2021	1.73084	9.0668	-4.56215
665	6	Incidence	44770	Brighton and Hove	3	Both	27	Age-standardized	682	Caries of permanent teeth	3	Rate	1990	2021	1.28135	8.01532	-6.58111
666	6	Incidence	44763	West Berkshire	3	Both	27	Age-standardized	682	Caries of permanent teeth	3	Rate	1990	2021	0.400432	8.13645	-6.30514
667	6	Incidence	44787	Swindon	3	Both	27	Age-standardized	682	Caries of permanent teeth	3	Rate	1990	2021	1.29364	7.68223	-3.88688
668	6	Incidence	44746	Wandsworth	3	Both	27	Age-standardized	682	Caries of permanent teeth	3	Rate	1990	2021	2.83554	10.1275	-3.06017
669	6	Incidence	44683	North Lincolnshire	3	Both	27	Age-standardized	682	Caries of permanent teeth	3	Rate	1990	2021	-8.39947	11.3034	-24.4942
670	6	Incidence	44859	Harari	3	Both	27	Age-standardized	682	Caries of permanent teeth	3	Rate	1990	2021	0.43872	5.60597	-5.46165
671	6	Incidence	44693	Northamptonshire	3	Both	27	Age-standardized	682	Caries of permanent teeth	3	Rate	1990	2021	3.18658	9.61659	-3.93922
672	6	Incidence	44739	Sutton	3	Both	27	Age-standardized	682	Caries of permanent teeth	3	Rate	1990	2021	0.281612	6.48385	-5.40235
673	6	Incidence	44729	Barnet	3	Both	27	Age-standardized	682	Caries of permanent teeth	3	Rate	1990	2021	2.22	8.77269	-3.25913
674	6	Incidence	44688	Wakefield	3	Both	27	Age-standardized	682	Caries of permanent teeth	3	Rate	1990	2021	-9.61515	9.31473	-24.3324
675	6	Incidence	44698	Derbyshire	3	Both	27	Age-standardized	682	Caries of permanent teeth	3	Rate	1990	2021	0.0250054	8.10493	-8.55427
676	6	Incidence	44872	Golestan	3	Both	27	Age-standardized	682	Caries of permanent teeth	3	Rate	1990	2021	-0.633071	4.60114	-5.60521
677	6	Incidence	44782	Devon	3	Both	27	Age-standardized	682	Caries of permanent teeth	3	Rate	1990	2021	1.59172	8.06208	-4.44267
678	6	Incidence	44854	Amhara	3	Both	27	Age-standardized	682	Caries of permanent teeth	3	Rate	1990	2021	0.216299	7.45561	-6.17507
679	6	Incidence	44710	Telford and Wrekin	3	Both	27	Age-standardized	682	Caries of permanent teeth	3	Rate	1990	2021	-0.152896	6.91191	-6.30959
680	6	Incidence	44727	Richmond upon Thames	3	Both	27	Age-standardized	682	Caries of permanent teeth	3	Rate	1990	2021	1.22318	7.82883	-6.61383
681	6	Incidence	44705	Shropshire	3	Both	27	Age-standardized	682	Caries of permanent teeth	3	Rate	1990	2021	1.84614	7.79516	-4.04956
682	6	Incidence	44744	Ealing	3	Both	27	Age-standardized	682	Caries of permanent teeth	3	Rate	1990	2021	1.94076	8.18936	-4.33701
683	6	Incidence	44760	Buckinghamshire	3	Both	27	Age-standardized	682	Caries of permanent teeth	3	Rate	1990	2021	-0.447034	5.71258	-6.43121
684	6	Incidence	44715	Sandwell	3	Both	27	Age-standardized	682	Caries of permanent teeth	3	Rate	1990	2021	2.28178	7.64587	-3.4879
685	6	Incidence	44722	Thurrock	3	Both	27	Age-standardized	682	Caries of permanent teeth	3	Rate	1990	2021	-0.0316529	5.68856	-5.50028
686	6	Incidence	44780	Wiltshire	3	Both	27	Age-standardized	682	Caries of permanent teeth	3	Rate	1990	2021	0.991217	8.51829	-6.47163
687	6	Incidence	44734	Merton	3	Both	27	Age-standardized	682	Caries of permanent teeth	3	Rate	1990	2021	-6.75095	4.53628	-17.2183
688	6	Incidence	44768	Reading	3	Both	27	Age-standardized	682	Caries of permanent teeth	3	Rate	1990	2021	0.129052	6.58562	-6.24888
689	6	Incidence	44865	Ardebil	3	Both	27	Age-standardized	682	Caries of permanent teeth	3	Rate	1990	2021	1.30527	7.12426	-4.24393
690	6	Incidence	44870	Fars	3	Both	27	Age-standardized	682	Caries of permanent teeth	3	Rate	1990	2021	1.07009	6.81123	-5.04127
691	6	Incidence	44773	Portsmouth	3	Both	27	Age-standardized	682	Caries of permanent teeth	3	Rate	1990	2021	3.10904	10.9193	-2.49522
692	6	Incidence	44785	Gloucestershire	3	Both	27	Age-standardized	682	Caries of permanent teeth	3	Rate	1990	2021	2.03946	9.35188	-4.18993
693	6	Incidence	44790	Bournemouth	3	Both	27	Age-standardized	682	Caries of permanent teeth	3	Rate	1990	2021	0.647795	5.8431	-5.51862
694	6	Incidence	44852	Tigray	3	Both	27	Age-standardized	682	Caries of permanent teeth	3	Rate	1990	2021	-0.824108	5.48395	-7.82371
695	6	Incidence	44737	Havering	3	Both	27	Age-standardized	682	Caries of permanent teeth	3	Rate	1990	2021	2.61486	8.64738	-2.76391
696	6	Incidence	44703	Herefordshire, County of	3	Both	27	Age-standardized	682	Caries of permanent teeth	3	Rate	1990	2021	2.94207	8.33562	-1.74516
697	6	Incidence	44766	West Sussex	3	Both	27	Age-standardized	682	Caries of permanent teeth	3	Rate	1990	2021	1.87745	7.58681	-3.10305
698	6	Incidence	44778	South Gloucestershire	3	Both	27	Age-standardized	682	Caries of permanent teeth	3	Rate	1990	2021	1.55356	8.06759	-5.19101
699	6	Incidence	44751	Hounslow	3	Both	27	Age-standardized	682	Caries of permanent teeth	3	Rate	1990	2021	0.026383	5.94159	-6.02185
700	6	Incidence	44675	Knowsley	3	Both	27	Age-standardized	682	Caries of permanent teeth	3	Rate	1990	2021	2.17203	8.46238	-3.38207
701	6	Incidence	44894	Zanjan	3	Both	27	Age-standardized	682	Caries of permanent teeth	3	Rate	1990	2021	0.891658	7.7933	-4.80221
702	6	Incidence	44887	Mazandaran	3	Both	27	Age-standardized	682	Caries of permanent teeth	3	Rate	1990	2021	0.730285	7.82021	-5.25334
703	6	Incidence	44732	Bexley	3	Both	27	Age-standardized	682	Caries of permanent teeth	3	Rate	1990	2021	-11.7697	7.8	-27.0796
704	6	Incidence	44882	Khuzestan	3	Both	27	Age-standardized	682	Caries of permanent teeth	3	Rate	1990	2021	1.12742	6.16484	-6.01182
705	6	Incidence	44756	Hackney	3	Both	27	Age-standardized	682	Caries of permanent teeth	3	Rate	1990	2021	0.263187	6.23849	-4.54124
706	6	Incidence	44877	Kerman	3	Both	27	Age-standardized	682	Caries of permanent teeth	3	Rate	1990	2021	0.0951002	4.89055	-5.20107
707	6	Incidence	44776	Southampton	3	Both	27	Age-standardized	682	Caries of permanent teeth	3	Rate	1990	2021	0.862197	7.11247	-4.74684
708	6	Incidence	44862	Dire Dawa	3	Both	27	Age-standardized	682	Caries of permanent teeth	3	Rate	1990	2021	-0.175597	7.81256	-6.49371
709	6	Incidence	44749	Lambeth	3	Both	27	Age-standardized	682	Caries of permanent teeth	3	Rate	1990	2021	1.18616	8.17528	-4.46347
710	6	Incidence	44680	York	3	Both	27	Age-standardized	682	Caries of permanent teeth	3	Rate	1990	2021	0.216827	6.04439	-5.42159
711	6	Incidence	44892	Tehran	3	Both	27	Age-standardized	682	Caries of permanent teeth	3	Rate	1990	2021	0.248536	5.64861	-6.4899
712	6	Incidence	44742	Croydon	3	Both	27	Age-standardized	682	Caries of permanent teeth	3	Rate	1990	2021	1.27795	7.72444	-4.86139
713	6	Incidence	44771	Medway	3	Both	27	Age-standardized	682	Caries of permanent teeth	3	Rate	1990	2021	2.11794	8.02068	-4.11016
714	6	Incidence	44754	Barking and Dagenham	3	Both	27	Age-standardized	682	Caries of permanent teeth	3	Rate	1990	2021	0.202852	6.52861	-5.46524
715	6	Incidence	44720	Essex	3	Both	27	Age-standardized	682	Caries of permanent teeth	3	Rate	1990	2021	-0.223136	9.48516	-7.08666
716	6	Incidence	44747	Waltham Forest	3	Both	27	Age-standardized	682	Caries of permanent teeth	3	Rate	1990	2021	1.95102	7.90784	-4.05587
717	6	Incidence	44857	Benishangul-Gumuz	3	Both	27	Age-standardized	682	Caries of permanent teeth	3	Rate	1990	2021	0.434556	6.71326	-5.0437
718	6	Incidence	44725	Peterborough	3	Both	27	Age-standardized	682	Caries of permanent teeth	3	Rate	1990	2021	-0.369179	5.82164	-6.07781
719	6	Incidence	44885	Lorestan	3	Both	27	Age-standardized	682	Caries of permanent teeth	3	Rate	1990	2021	1.16311	7.79187	-4.7689
720	6	Incidence	44788	Torbay	3	Both	27	Age-standardized	682	Caries of permanent teeth	3	Rate	1990	2021	0.540423	8.67633	-5.88237
721	6	Incidence	44759	Wokingham	3	Both	27	Age-standardized	682	Caries of permanent teeth	3	Rate	1990	2021	0.199619	6.65963	-5.43361
722	6	Incidence	44764	Hampshire	3	Both	27	Age-standardized	682	Caries of permanent teeth	3	Rate	1990	2021	-0.0158051	5.1545	-5.71691
723	6	Incidence	44875	Ilam	3	Both	27	Age-standardized	682	Caries of permanent teeth	3	Rate	1990	2021	0.524028	6.60071	-5.82486
724	6	Incidence	44873	Hamadan	3	Both	27	Age-standardized	682	Caries of permanent teeth	3	Rate	1990	2021	0.834043	8.40606	-4.73171
725	6	Incidence	44880	Khorasan-e-Razavi	3	Both	27	Age-standardized	682	Caries of permanent teeth	3	Rate	1990	2021	0.74801	6.77388	-4.82003
726	6	Incidence	44855	Oromia	3	Both	27	Age-standardized	682	Caries of permanent teeth	3	Rate	1990	2021	-1.26063	4.92438	-6.54838
727	6	Incidence	44868	Bushehr	3	Both	27	Age-standardized	682	Caries of permanent teeth	3	Rate	1990	2021	0.0762058	5.86644	-6.6571
728	6	Incidence	44860	Gambella	3	Both	27	Age-standardized	682	Caries of permanent teeth	3	Rate	1990	2021	-0.207233	6.8801	-6.97963
729	6	Incidence	53620	Punjab	3	Both	27	Age-standardized	682	Caries of permanent teeth	3	Rate	1990	2021	-1.55929	6.12235	-8.42049
730	6	Incidence	44700	Nottingham	3	Both	27	Age-standardized	682	Caries of permanent teeth	3	Rate	1990	2021	1.42704	6.86514	-3.43657
731	6	Incidence	44783	Poole	3	Both	27	Age-standardized	682	Caries of permanent teeth	3	Rate	1990	2021	3.66557	13.004	-2.57867
732	6	Incidence	44730	Westminster	3	Both	27	Age-standardized	682	Caries of permanent teeth	3	Rate	1990	2021	2.69709	12.3216	-5.48356
733	6	Incidence	44690	Doncaster	3	Both	27	Age-standardized	682	Caries of permanent teeth	3	Rate	1990	2021	1.75083	7.42365	-4.08827
734	6	Incidence	53615	Azad Jammu & Kashmir	3	Both	27	Age-standardized	682	Caries of permanent teeth	3	Rate	1990	2021	-0.068959	7.21455	-6.58559
735	6	Incidence	44774	Isle of Wight	3	Both	27	Age-standardized	682	Caries of permanent teeth	3	Rate	1990	2021	1.55796	7.62745	-3.63961
736	6	Incidence	44735	Brent	3	Both	27	Age-standardized	682	Caries of permanent teeth	3	Rate	1990	2021	2.5947	9.93666	-3.32511
737	6	Incidence	94365	Central Africa	3	Both	27	Age-standardized	682	Caries of permanent teeth	3	Rate	1990	2021	0.270024	4.95817	-3.43492
738	6	Incidence	44871	Gilan	3	Both	27	Age-standardized	682	Caries of permanent teeth	3	Rate	1990	2021	-0.168745	5.6335	-6.88781
739	6	Incidence	44769	Kent	3	Both	27	Age-standardized	682	Caries of permanent teeth	3	Rate	1990	2021	1.20168	7.21402	-4.67608
740	6	Incidence	44791	Cornwall	3	Both	27	Age-standardized	682	Caries of permanent teeth	3	Rate	1990	2021	-0.261611	6.59517	-6.18663
741	6	Incidence	53432	Tr酶ndelag	3	Both	27	Age-standardized	682	Caries of permanent teeth	3	Rate	1990	2021	1.25499	7.41673	-5.99805
742	6	Incidence	60136	Viken	3	Both	27	Age-standardized	682	Caries of permanent teeth	3	Rate	1990	2021	0.153311	7.10483	-5.77316
743	6	Incidence	44786	Somerset	3	Both	27	Age-standardized	682	Caries of permanent teeth	3	Rate	1990	2021	0.772109	7.45668	-5.32001
744	6	Incidence	44893	Yazd	3	Both	27	Age-standardized	682	Caries of permanent teeth	3	Rate	1990	2021	-0.750337	6.25817	-6.66927
745	6	Incidence	44878	Kermanshah	3	Both	27	Age-standardized	682	Caries of permanent teeth	3	Rate	1990	2021	-0.0662948	6.99991	-6.95372
746	6	Incidence	44853	Afar	3	Both	27	Age-standardized	682	Caries of permanent teeth	3	Rate	1990	2021	-0.482745	6.3009	-6.70518
747	6	Incidence	44767	Oxfordshire	3	Both	27	Age-standardized	682	Caries of permanent teeth	3	Rate	1990	2021	2.67607	8.59204	-3.25627
748	6	Incidence	53618	Islamabad Capital Territory	3	Both	27	Age-standardized	682	Caries of permanent teeth	3	Rate	1990	2021	-1.31845	8.37728	-10.0604
749	6	Incidence	44866	East Azarbayejan	3	Both	27	Age-standardized	682	Caries of permanent teeth	3	Rate	1990	2021	-0.0257557	5.35555	-6.02037
750	6	Incidence	44752	Southwark	3	Both	27	Age-standardized	682	Caries of permanent teeth	3	Rate	1990	2021	-11.9473	9.60898	-27.5423
751	6	Incidence	95467	Advanced Health System	3	Both	27	Age-standardized	682	Caries of permanent teeth	3	Rate	1990	2021	-1.23358	0.554498	-2.91642
752	6	Incidence	95469	Limited Health System	3	Both	27	Age-standardized	682	Caries of permanent teeth	3	Rate	1990	2021	1.14973	3.16063	-0.888846
753	6	Incidence	44781	North Somerset	3	Both	27	Age-standardized	682	Caries of permanent teeth	3	Rate	1990	2021	0.610924	7.25781	-5.67026
754	6	Incidence	44883	Kohgiluyeh and Boyer-Ahmad	3	Both	27	Age-standardized	682	Caries of permanent teeth	3	Rate	1990	2021	0.461029	8.69155	-6.9027
755	6	Incidence	44888	Qazvin	3	Both	27	Age-standardized	682	Caries of permanent teeth	3	Rate	1990	2021	1.18078	6.17082	-5.43029
756	6	Incidence	44864	Alborz	3	Both	27	Age-standardized	682	Caries of permanent teeth	3	Rate	1990	2021	-0.742717	5.35462	-7.56368
757	6	Incidence	44779	Dorset	3	Both	27	Age-standardized	682	Caries of permanent teeth	3	Rate	1990	2021	-0.0409308	7.91561	-6.24186
758	6	Incidence	94216	Association of Southeast Asian Nations	3	Both	27	Age-standardized	682	Caries of permanent teeth	3	Rate	1990	2021	0.789309	3.28029	-1.89255
759	6	Incidence	44876	Isfahan	3	Both	27	Age-standardized	682	Caries of permanent teeth	3	Rate	1990	2021	-1.04883	7.21363	-7.22741
760	6	Incidence	44757	Islington	3	Both	27	Age-standardized	682	Caries of permanent teeth	3	Rate	1990	2021	-10.4627	8.51553	-25.8652
761	6	Incidence	44789	Bristol, City of	3	Both	27	Age-standardized	682	Caries of permanent teeth	3	Rate	1990	2021	0.758416	6.52272	-5.51274
762	6	Incidence	44890	Semnan	3	Both	27	Age-standardized	682	Caries of permanent teeth	3	Rate	1990	2021	-0.0100506	6.37716	-6.04126
763	6	Incidence	95081	Brazil South	3	Both	27	Age-standardized	682	Caries of permanent teeth	3	Rate	1990	2021	-0.383957	4.0836	-4.28166
764	6	Incidence	95471	Health System Grouping Levels	3	Both	27	Age-standardized	682	Caries of permanent teeth	3	Rate	1990	2021	6.00542	7.85658	4.31313
765	6	Incidence	44858	Southern Nations, Nationalities, and Peoples	3	Both	27	Age-standardized	682	Caries of permanent teeth	3	Rate	1990	2021	0.676439	6.26341	-4.87651
766	6	Incidence	60134	Vestfold og Telemark	3	Both	27	Age-standardized	682	Caries of permanent teeth	3	Rate	1990	2021	1.37439	6.97567	-5.63269
767	6	Incidence	95468	Basic Health System	3	Both	27	Age-standardized	682	Caries of permanent teeth	3	Rate	1990	2021	14.8612	19.2576	11.2313
768	6	Incidence	44856	Somali	3	Both	27	Age-standardized	682	Caries of permanent teeth	3	Rate	1990	2021	0.620424	6.71693	-5.36318
769	6	Incidence	44874	Hormozgan	3	Both	27	Age-standardized	682	Caries of permanent teeth	3	Rate	1990	2021	-0.596345	4.76861	-6.22942
770	6	Incidence	44761	Surrey	3	Both	27	Age-standardized	682	Caries of permanent teeth	3	Rate	1990	2021	1.81024	7.65386	-4.03982
771	6	Incidence	95082	Brazil Southeast	3	Both	27	Age-standardized	682	Caries of permanent teeth	3	Rate	1990	2021	3.86567	7.52982	0.0859346
772	6	Incidence	95470	Minimal Health System	3	Both	27	Age-standardized	682	Caries of permanent teeth	3	Rate	1990	2021	1.79854	4.32129	-0.543624
773	6	Incidence	44881	South Khorasan	3	Both	27	Age-standardized	682	Caries of permanent teeth	3	Rate	1990	2021	-0.058921	6.75478	-5.66869
774	6	Incidence	44886	Markazi	3	Both	27	Age-standardized	682	Caries of permanent teeth	3	Rate	1990	2021	0.449089	7.25819	-5.23267
775	6	Incidence	53621	Sindh	3	Both	27	Age-standardized	682	Caries of permanent teeth	3	Rate	1990	2021	-1.49792	5.38647	-8.4772
776	6	Incidence	60132	Vestland	3	Both	27	Age-standardized	682	Caries of permanent teeth	3	Rate	1990	2021	1.26195	8.11286	-5.30237
777	6	Incidence	44869	Chahar Mahaal and Bakhtiari	3	Both	27	Age-standardized	682	Caries of permanent teeth	3	Rate	1990	2021	-0.163109	7.26381	-6.39323
778	6	Incidence	44784	Bath and North East Somerset	3	Both	27	Age-standardized	682	Caries of permanent teeth	3	Rate	1990	2021	-0.294551	8.61731	-7.94325
779	6	Incidence	44879	North Khorasan	3	Both	27	Age-standardized	682	Caries of permanent teeth	3	Rate	1990	2021	0.162265	6.0146	-6.43957
780	6	Incidence	60137	Troms og Finnmark	3	Both	27	Age-standardized	682	Caries of permanent teeth	3	Rate	1990	2021	6.31893	12.9922	-0.231593
781	6	Incidence	53616	Balochistan	3	Both	27	Age-standardized	682	Caries of permanent teeth	3	Rate	1990	2021	-2.67839	4.3255	-9.27406
782	6	Incidence	94366	Sahel Region	3	Both	27	Age-standardized	682	Caries of permanent teeth	3	Rate	1990	2021	-0.691436	1.06394	-2.39726
783	6	Incidence	44884	Kurdistan	3	Both	27	Age-standardized	682	Caries of permanent teeth	3	Rate	1990	2021	1.70151	6.87602	-2.7937
784	6	Incidence	53619	Khyber Pakhtunkhwa	3	Both	27	Age-standardized	682	Caries of permanent teeth	3	Rate	1990	2021	-2.19396	4.0662	-8.04552
785	6	Incidence	44889	Qom	3	Both	27	Age-standardized	682	Caries of permanent teeth	3	Rate	1990	2021	0.0430981	6.69373	-5.91039
786	6	Incidence	95079	Brazil Northeast	3	Both	27	Age-standardized	682	Caries of permanent teeth	3	Rate	1990	2021	0.146675	3.55643	-3.65759
787	6	Incidence	94217	Gulf Cooperation Council	3	Both	27	Age-standardized	682	Caries of permanent teeth	3	Rate	1990	2021	0.841675	4.99117	-2.71181
788	6	Incidence	60135	Innlandet	3	Both	27	Age-standardized	682	Caries of permanent teeth	3	Rate	1990	2021	0.884632	8.01124	-4.47051
789	6	Incidence	53617	Gilgit-Baltistan	3	Both	27	Age-standardized	682	Caries of permanent teeth	3	Rate	1990	2021	-0.800099	6.17578	-6.9822
790	6	Incidence	95078	Brazil North	3	Both	27	Age-standardized	682	Caries of permanent teeth	3	Rate	1990	2021	-0.0375601	3.49763	-3.71015
791	6	Incidence	60133	Agder	3	Both	27	Age-standardized	682	Caries of permanent teeth	3	Rate	1990	2021	4.06104	11.3536	-3.68872
792	6	Incidence	44762	Windsor and Maidenhead	3	Both	27	Age-standardized	682	Caries of permanent teeth	3	Rate	1990	2021	-4.74801	6.20783	-14.7936
793	6	Incidence	94215	Organization of Islamic Cooperation	3	Both	27	Age-standardized	682	Caries of permanent teeth	3	Rate	1990	2021	-0.396682	1.17016	-2.07047
794	6	Incidence	44891	Sistan and Baluchistan	3	Both	27	Age-standardized	682	Caries of permanent teeth	3	Rate	1990	2021	0.805307	6.06498	-4.35981
795	6	Incidence	95080	Brazil Central-West	3	Both	27	Age-standardized	682	Caries of permanent teeth	3	Rate	1990	2021	-0.174697	4.77099	-3.82196
