# Supplementary material for: Global, Regional, and National Levels and Trends in Burden of Dental Caries and Periodontal Disease from 1990 to 2035：Result From the Global Burden of Disease Study 2021
Source: Research Square preprint supplement (doi:10.21203/rs.3.rs-5609270/v1), 2025-04-02
Supplement: Supplementary file 20 [file a0baeeef25c376b5fcca5043.xlsx]

## Sheet: Sheet1
Exported data
	measure_id	measure_name	location_id	location_name	sex_id	sex_name	age_id	age_name	cause_id	cause_name	metric_id	metric_name	year_start	year_end	val	upper	lower
1	5	Prevalence	9	Southeast Asia	3	Both	27	Age-standardized	682	Caries of permanent teeth	3	Rate	1990	2021	-6.49382	-4.22867	-8.679
2	5	Prevalence	7	Democratic People's Republic of Korea	3	Both	27	Age-standardized	682	Caries of permanent teeth	3	Rate	1990	2021	9.09176	18.3135	0.512891
3	5	Prevalence	31	Central Europe, Eastern Europe, and Central Asia	3	Both	27	Age-standardized	682	Caries of permanent teeth	3	Rate	1990	2021	-3.60106	-2.19074	-5.00383
4	5	Prevalence	1	Global	3	Both	27	Age-standardized	682	Caries of permanent teeth	3	Rate	1990	2021	-2.78192	-0.639817	-4.6815
5	5	Prevalence	20	Socialist Republic of Viet Nam	3	Both	27	Age-standardized	682	Caries of permanent teeth	3	Rate	1990	2021	-12.4935	-4.99829	-19.8838
6	5	Prevalence	18	Kingdom of Thailand	3	Both	27	Age-standardized	682	Caries of permanent teeth	3	Rate	1990	2021	-6.3156	1.40485	-13.4083
7	5	Prevalence	62	Russian Federation	3	Both	27	Age-standardized	682	Caries of permanent teeth	3	Rate	1990	2021	-3.53814	-0.623982	-5.57622
8	5	Prevalence	29	Kingdom of Tonga	3	Both	27	Age-standardized	682	Caries of permanent teeth	3	Rate	1990	2021	-2.33429	4.30259	-8.84432
9	5	Prevalence	40	Turkmenistan	3	Both	27	Age-standardized	682	Caries of permanent teeth	3	Rate	1990	2021	-3.05468	3.58551	-9.00344
10	5	Prevalence	5	East Asia	3	Both	27	Age-standardized	682	Caries of permanent teeth	3	Rate	1990	2021	-0.944681	7.66848	-8.73204
11	5	Prevalence	51	Republic of Poland	3	Both	27	Age-standardized	682	Caries of permanent teeth	3	Rate	1990	2021	-4.86282	-2.19149	-7.40959
12	5	Prevalence	71	Australia	3	Both	27	Age-standardized	682	Caries of permanent teeth	3	Rate	1990	2021	-15.5719	-6.18553	-25.5567
13	5	Prevalence	104	Caribbean	3	Both	27	Age-standardized	682	Caries of permanent teeth	3	Rate	1990	2021	-6.45673	0.75733	-11.9885
14	5	Prevalence	60	Republic of Lithuania	3	Both	27	Age-standardized	682	Caries of permanent teeth	3	Rate	1990	2021	-8.41789	1.39675	-16.2868
15	5	Prevalence	84	Ireland	3	Both	27	Age-standardized	682	Caries of permanent teeth	3	Rate	1990	2021	-8.96676	-2.08095	-14.3174
16	5	Prevalence	27	Independent State of Samoa	3	Both	27	Age-standardized	682	Caries of permanent teeth	3	Rate	1990	2021	-1.40024	4.22121	-6.69573
17	5	Prevalence	93	Kingdom of Sweden	3	Both	27	Age-standardized	682	Caries of permanent teeth	3	Rate	1990	2021	8.19303	17.0081	0.871576
18	5	Prevalence	73	Western Europe	3	Both	27	Age-standardized	682	Caries of permanent teeth	3	Rate	1990	2021	-8.91246	-4.06814	-13.5281
19	5	Prevalence	38	Mongolia	3	Both	27	Age-standardized	682	Caries of permanent teeth	3	Rate	1990	2021	-4.50139	2.5771	-10.5202
20	5	Prevalence	82	Hellenic Republic	3	Both	27	Age-standardized	682	Caries of permanent teeth	3	Rate	1990	2021	-13.0799	-4.02533	-21.7084
21	5	Prevalence	95	United Kingdom of Great Britain and Northern Ireland	3	Both	27	Age-standardized	682	Caries of permanent teeth	3	Rate	1990	2021	-7.56145	-4.4735	-10.1004
22	5	Prevalence	49	North Macedonia	3	Both	27	Age-standardized	682	Caries of permanent teeth	3	Rate	1990	2021	-10.1344	-3.04211	-17.5231
23	5	Prevalence	159	South Asia	3	Both	27	Age-standardized	682	Caries of permanent teeth	3	Rate	1990	2021	-5.73524	-3.45921	-7.47591
24	5	Prevalence	16	Republic of the Philippines	3	Both	27	Age-standardized	682	Caries of permanent teeth	3	Rate	1990	2021	-2.43254	2.59252	-6.14111
25	5	Prevalence	25	Federated States of Micronesia	3	Both	27	Age-standardized	682	Caries of permanent teeth	3	Rate	1990	2021	-1.7402	3.03569	-7.01118
26	5	Prevalence	157	Yemen	3	Both	27	Age-standardized	682	Caries of permanent teeth	3	Rate	1990	2021	-0.499991	7.07108	-7.22752
27	5	Prevalence	102	United States of America	3	Both	27	Age-standardized	682	Caries of permanent teeth	3	Rate	1990	2021	-5.27067	-1.28056	-8.90249
28	5	Prevalence	168	Angola	3	Both	27	Age-standardized	682	Caries of permanent teeth	3	Rate	1990	2021	-3.60308	3.02905	-11.5365
29	5	Prevalence	126	Republic of Costa Rica	3	Both	27	Age-standardized	682	Caries of permanent teeth	3	Rate	1990	2021	-4.24195	0.911851	-8.95878
30	5	Prevalence	124	Central Latin America	3	Both	27	Age-standardized	682	Caries of permanent teeth	3	Rate	1990	2021	-4.08251	-1.98071	-6.12755
31	5	Prevalence	148	Morocco	3	Both	27	Age-standardized	682	Caries of permanent teeth	3	Rate	1990	2021	-34.032	-23.0748	-43.7885
32	5	Prevalence	69	Republic of Singapore	3	Both	27	Age-standardized	682	Caries of permanent teeth	3	Rate	1990	2021	-5.25434	2.64262	-12.6943
33	5	Prevalence	56	Eastern Europe	3	Both	27	Age-standardized	682	Caries of permanent teeth	3	Rate	1990	2021	-2.28547	-0.0840966	-4.27481
34	5	Prevalence	14	Republic of Maldives	3	Both	27	Age-standardized	682	Caries of permanent teeth	3	Rate	1990	2021	-6.55357	-0.679979	-11.7719
35	5	Prevalence	91	Portuguese Republic	3	Both	27	Age-standardized	682	Caries of permanent teeth	3	Rate	1990	2021	-4.83258	4.42557	-12.3398
36	5	Prevalence	135	Federative Republic of Brazil	3	Both	27	Age-standardized	682	Caries of permanent teeth	3	Rate	1990	2021	-1.93717	0.689549	-4.2854
37	5	Prevalence	137	North Africa and Middle East	3	Both	27	Age-standardized	682	Caries of permanent teeth	3	Rate	1990	2021	-4.37592	-2.35643	-6.36078
38	5	Prevalence	146	Lebanon	3	Both	27	Age-standardized	682	Caries of permanent teeth	3	Rate	1990	2021	-2.98257	2.29311	-8.03932
39	5	Prevalence	58	Republic of Estonia	3	Both	27	Age-standardized	682	Caries of permanent teeth	3	Rate	1990	2021	-6.21934	4.06066	-13.965
40	5	Prevalence	113	Republic of Guyana	3	Both	27	Age-standardized	682	Caries of permanent teeth	3	Rate	1990	2021	-5.85964	1.63061	-11.9372
41	5	Prevalence	12	Lao People's Democratic Republic	3	Both	27	Age-standardized	682	Caries of permanent teeth	3	Rate	1990	2021	-9.3837	-3.0029	-14.7549
42	5	Prevalence	80	French Republic	3	Both	27	Age-standardized	682	Caries of permanent teeth	3	Rate	1990	2021	-8.32443	0.557299	-16.4331
43	5	Prevalence	166	Sub-Saharan Africa	3	Both	27	Age-standardized	682	Caries of permanent teeth	3	Rate	1990	2021	-4.87104	-3.27609	-6.53829
44	5	Prevalence	78	Kingdom of Denmark	3	Both	27	Age-standardized	682	Caries of permanent teeth	3	Rate	1990	2021	10.5128	47.9891	-16.3013
45	5	Prevalence	23	Republic of Kiribati	3	Both	27	Age-standardized	682	Caries of permanent teeth	3	Rate	1990	2021	0.611684	6.59461	-5.015
46	5	Prevalence	115	Jamaica	3	Both	27	Age-standardized	682	Caries of permanent teeth	3	Rate	1990	2021	-2.90671	3.23756	-8.71789
47	5	Prevalence	45	Republic of Bulgaria	3	Both	27	Age-standardized	682	Caries of permanent teeth	3	Rate	1990	2021	-6.77031	-1.35064	-12.7796
48	5	Prevalence	89	Kingdom of the Netherlands	3	Both	27	Age-standardized	682	Caries of permanent teeth	3	Rate	1990	2021	-24.9703	-12.9939	-36.7982
49	5	Prevalence	47	Czech Republic	3	Both	27	Age-standardized	682	Caries of permanent teeth	3	Rate	1990	2021	-4.53491	1.80994	-11.1084
50	5	Prevalence	122	Republic of Ecuador	3	Both	27	Age-standardized	682	Caries of permanent teeth	3	Rate	1990	2021	-0.266962	5.27579	-4.62881
51	5	Prevalence	34	Republic of Azerbaijan	3	Both	27	Age-standardized	682	Caries of permanent teeth	3	Rate	1990	2021	-1.90607	4.59957	-8.03464
52	5	Prevalence	244	South Asia - WB	3	Both	27	Age-standardized	682	Caries of permanent teeth	3	Rate	1990	2021	-5.55411	-3.36177	-7.25497
53	5	Prevalence	36	Republic of Kazakhstan	3	Both	27	Age-standardized	682	Caries of permanent teeth	3	Rate	1990	2021	-2.65936	4.32758	-8.64684
54	5	Prevalence	155	Turkey	3	Both	27	Age-standardized	682	Caries of permanent teeth	3	Rate	1990	2021	-6.02572	1.12708	-11.7635
55	5	Prevalence	144	Hashemite Kingdom of Jordan	3	Both	27	Age-standardized	682	Caries of permanent teeth	3	Rate	1990	2021	-3.24139	4.36861	-8.56966
56	5	Prevalence	109	Republic of Cuba	3	Both	27	Age-standardized	682	Caries of permanent teeth	3	Rate	1990	2021	-3.4073	2.52934	-8.92183
57	5	Prevalence	133	Bolivarian Republic of Venezuela	3	Both	27	Age-standardized	682	Caries of permanent teeth	3	Rate	1990	2021	-0.211037	5.42429	-4.83261
58	5	Prevalence	67	Japan	3	Both	27	Age-standardized	682	Caries of permanent teeth	3	Rate	1990	2021	-22.0373	-16.5537	-27.1909
59	5	Prevalence	98	Republic of Chile	3	Both	27	Age-standardized	682	Caries of permanent teeth	3	Rate	1990	2021	1.34925	12.9771	-10.5299
60	5	Prevalence	100	High-income North America	3	Both	27	Age-standardized	682	Caries of permanent teeth	3	Rate	1990	2021	-5.12546	-1.34597	-8.53371
61	5	Prevalence	153	Syrian Arab Republic	3	Both	27	Age-standardized	682	Caries of permanent teeth	3	Rate	1990	2021	-2.2115	4.51915	-7.09495
62	5	Prevalence	131	Republic of Nicaragua	3	Both	27	Age-standardized	682	Caries of permanent teeth	3	Rate	1990	2021	-2.42461	3.3441	-8.22911
63	5	Prevalence	111	Dominican Republic	3	Both	27	Age-standardized	682	Caries of permanent teeth	3	Rate	1990	2021	-6.04485	-0.522886	-11.9333
64	5	Prevalence	43	Republic of Albania	3	Both	27	Age-standardized	682	Caries of permanent teeth	3	Rate	1990	2021	-6.90026	-0.283777	-12.5092
65	5	Prevalence	6	People's Republic of China	3	Both	27	Age-standardized	682	Caries of permanent teeth	3	Rate	1990	2021	-0.971454	7.82879	-8.89404
66	5	Prevalence	10	Kingdom of Cambodia	3	Both	27	Age-standardized	682	Caries of permanent teeth	3	Rate	1990	2021	-6.06536	-1.05852	-11.4931
67	5	Prevalence	164	Nepal	3	Both	27	Age-standardized	682	Caries of permanent teeth	3	Rate	1990	2021	-8.00258	-1.46025	-14.1767
68	5	Prevalence	179	Ethiopia	3	Both	27	Age-standardized	682	Caries of permanent teeth	3	Rate	1990	2021	-7.16238	-3.59919	-10.4269
69	5	Prevalence	142	Islamic Republic of Iran	3	Both	27	Age-standardized	682	Caries of permanent teeth	3	Rate	1990	2021	-2.73041	-1.29441	-4.54033
70	5	Prevalence	8	Taiwan (Province of China)	3	Both	27	Age-standardized	682	Caries of permanent teeth	3	Rate	1990	2021	-4.18064	5.82645	-11.5605
71	5	Prevalence	21	Oceania	3	Both	27	Age-standardized	682	Caries of permanent teeth	3	Rate	1990	2021	-1.26925	2.69929	-4.94724
72	5	Prevalence	198	Zimbabwe	3	Both	27	Age-standardized	682	Caries of permanent teeth	3	Rate	1990	2021	1.0499	9.34291	-7.60971
73	5	Prevalence	162	Bhutan	3	Both	27	Age-standardized	682	Caries of permanent teeth	3	Rate	1990	2021	-6.97912	-0.299806	-12.2428
74	5	Prevalence	175	Burundi	3	Both	27	Age-standardized	682	Caries of permanent teeth	3	Rate	1990	2021	1.59651	8.00271	-3.37523
75	5	Prevalence	191	Zambia	3	Both	27	Age-standardized	682	Caries of permanent teeth	3	Rate	1990	2021	-19.4623	-7.21589	-31.8251
76	5	Prevalence	19	Democratic Republic of Timor-Leste	3	Both	27	Age-standardized	682	Caries of permanent teeth	3	Rate	1990	2021	-6.18602	-0.93615	-11.468
77	5	Prevalence	200	Benin	3	Both	27	Age-standardized	682	Caries of permanent teeth	3	Rate	1990	2021	-2.58527	4.22548	-9.5685
78	5	Prevalence	32	Central Asia	3	Both	27	Age-standardized	682	Caries of permanent teeth	3	Rate	1990	2021	-1.76156	0.868156	-4.39006
79	5	Prevalence	41	Republic of Uzbekistan	3	Both	27	Age-standardized	682	Caries of permanent teeth	3	Rate	1990	2021	-3.29615	2.33643	-8.7592
80	5	Prevalence	213	Niger	3	Both	27	Age-standardized	682	Caries of permanent teeth	3	Rate	1990	2021	-1.02471	5.59026	-7.42844
81	5	Prevalence	28	Solomon Islands	3	Both	27	Age-standardized	682	Caries of permanent teeth	3	Rate	1990	2021	-0.782243	4.77497	-5.85281
82	5	Prevalence	30	Republic of Vanuatu	3	Both	27	Age-standardized	682	Caries of permanent teeth	3	Rate	1990	2021	0.00626102	4.71407	-5.93007
83	5	Prevalence	63	Ukraine	3	Both	27	Age-standardized	682	Caries of permanent teeth	3	Rate	1990	2021	1.44526	8.40793	-5.07924
84	5	Prevalence	173	Gabon	3	Both	27	Age-standardized	682	Caries of permanent teeth	3	Rate	1990	2021	0.0847406	7.92762	-6.57128
85	5	Prevalence	209	Guinea-Bissau	3	Both	27	Age-standardized	682	Caries of permanent teeth	3	Rate	1990	2021	-3.03139	3.37174	-8.91543
86	5	Prevalence	105	Antigua and Barbuda	3	Both	27	Age-standardized	682	Caries of permanent teeth	3	Rate	1990	2021	-3.99647	2.66356	-9.611
87	5	Prevalence	4	Southeast Asia, East Asia, and Oceania	3	Both	27	Age-standardized	682	Caries of permanent teeth	3	Rate	1990	2021	-0.25084	5.50303	-5.65115
88	5	Prevalence	39	Republic of Tajikistan	3	Both	27	Age-standardized	682	Caries of permanent teeth	3	Rate	1990	2021	0.980807	7.56393	-6.00535
89	5	Prevalence	52	Romania	3	Both	27	Age-standardized	682	Caries of permanent teeth	3	Rate	1990	2021	-10.7942	-3.816	-16.9031
90	5	Prevalence	177	Djibouti	3	Both	27	Age-standardized	682	Caries of permanent teeth	3	Rate	1990	2021	-13.0347	0.861279	-25.5801
91	5	Prevalence	74	Principality of Andorra	3	Both	27	Age-standardized	682	Caries of permanent teeth	3	Rate	1990	2021	-3.46894	2.74316	-10.134
92	5	Prevalence	61	Republic of Moldova	3	Both	27	Age-standardized	682	Caries of permanent teeth	3	Rate	1990	2021	-0.74552	4.81703	-6.97597
93	5	Prevalence	96	Southern Latin America	3	Both	27	Age-standardized	682	Caries of permanent teeth	3	Rate	1990	2021	1.369	7.08298	-3.82438
94	5	Prevalence	85	State of Israel	3	Both	27	Age-standardized	682	Caries of permanent teeth	3	Rate	1990	2021	-6.82143	-0.624762	-12.6255
95	5	Prevalence	72	New Zealand	3	Both	27	Age-standardized	682	Caries of permanent teeth	3	Rate	1990	2021	0.778193	7.74136	-5.0613
96	5	Prevalence	83	Republic of Iceland	3	Both	27	Age-standardized	682	Caries of permanent teeth	3	Rate	1990	2021	-17.322	-7.36811	-27.1131
97	5	Prevalence	171	Democratic Republic of the Congo	3	Both	27	Age-standardized	682	Caries of permanent teeth	3	Rate	1990	2021	3.59258	10.3109	-3.83044
98	5	Prevalence	207	Ghana	3	Both	27	Age-standardized	682	Caries of permanent teeth	3	Rate	1990	2021	-4.35902	3.81677	-11.6402
99	5	Prevalence	107	Barbados	3	Both	27	Age-standardized	682	Caries of permanent teeth	3	Rate	1990	2021	-0.886395	4.35625	-5.89563
100	5	Prevalence	189	United Republic of Tanzania	3	Both	27	Age-standardized	682	Caries of permanent teeth	3	Rate	1990	2021	-0.0680749	10.1029	-7.55112
101	5	Prevalence	240	Europe & Central Asia - WB	3	Both	27	Age-standardized	682	Caries of permanent teeth	3	Rate	1990	2021	-5.97449	-3.61456	-8.43124
102	5	Prevalence	202	Cameroon	3	Both	27	Age-standardized	682	Caries of permanent teeth	3	Rate	1990	2021	0.398834	6.40217	-5.71651
103	5	Prevalence	94	Swiss Confederation	3	Both	27	Age-standardized	682	Caries of permanent teeth	3	Rate	1990	2021	-3.00371	2.14169	-6.74252
104	5	Prevalence	211	Mali	3	Both	27	Age-standardized	682	Caries of permanent teeth	3	Rate	1990	2021	-3.6832	3.80548	-10.1741
105	5	Prevalence	103	Latin America and Caribbean	3	Both	27	Age-standardized	682	Caries of permanent teeth	3	Rate	1990	2021	-2.72162	-0.995384	-4.25167
106	5	Prevalence	184	Mozambique	3	Both	27	Age-standardized	682	Caries of permanent teeth	3	Rate	1990	2021	-20.3645	-12.6718	-27.8736
107	5	Prevalence	160	Afghanistan	3	Both	27	Age-standardized	682	Caries of permanent teeth	3	Rate	1990	2021	-0.0256631	5.89774	-5.22278
108	5	Prevalence	50	Montenegro	3	Both	27	Age-standardized	682	Caries of permanent teeth	3	Rate	1990	2021	-9.45118	-3.51301	-17.1699
109	5	Prevalence	186	Seychelles	3	Both	27	Age-standardized	682	Caries of permanent teeth	3	Rate	1990	2021	-5.27233	1.46396	-10.754
110	5	Prevalence	15	Republic of the Union of Myanmar	3	Both	27	Age-standardized	682	Caries of permanent teeth	3	Rate	1990	2021	-11.6851	-5.60092	-17.8125
111	5	Prevalence	17	Democratic Socialist Republic of Sri Lanka	3	Both	27	Age-standardized	682	Caries of permanent teeth	3	Rate	1990	2021	-8.74942	-3.41293	-14.3565
112	5	Prevalence	26	Independent State of Papua New Guinea	3	Both	27	Age-standardized	682	Caries of permanent teeth	3	Rate	1990	2021	-1.79592	3.92503	-6.74728
113	5	Prevalence	242	Sub-Saharan Africa - WB	3	Both	27	Age-standardized	682	Caries of permanent teeth	3	Rate	1990	2021	-4.81742	-3.22609	-6.42498
114	5	Prevalence	169	Central African Republic	3	Both	27	Age-standardized	682	Caries of permanent teeth	3	Rate	1990	2021	1.06544	8.6115	-6.33653
115	5	Prevalence	149	Palestine	3	Both	27	Age-standardized	682	Caries of permanent teeth	3	Rate	1990	2021	-4.35819	1.2626	-10.8265
116	5	Prevalence	138	North Africa and Middle East	3	Both	27	Age-standardized	682	Caries of permanent teeth	3	Rate	1990	2021	-4.37592	-2.35643	-6.36078
117	5	Prevalence	54	Slovak Republic	3	Both	27	Age-standardized	682	Caries of permanent teeth	3	Rate	1990	2021	-6.65274	-0.366676	-12.8235
118	5	Prevalence	147	Libya	3	Both	27	Age-standardized	682	Caries of permanent teeth	3	Rate	1990	2021	6.0739	13.7832	-0.985161
119	5	Prevalence	140	Kingdom of Bahrain	3	Both	27	Age-standardized	682	Caries of permanent teeth	3	Rate	1990	2021	-2.96643	4.42431	-9.74539
120	5	Prevalence	158	South Asia	3	Both	27	Age-standardized	682	Caries of permanent teeth	3	Rate	1990	2021	-5.73524	-3.45921	-7.47591
121	5	Prevalence	65	High-income Asia Pacific	3	Both	27	Age-standardized	682	Caries of permanent teeth	3	Rate	1990	2021	-13.1483	-8.87227	-16.8098
122	5	Prevalence	79	Republic of Finland	3	Both	27	Age-standardized	682	Caries of permanent teeth	3	Rate	1990	2021	-5.71566	1.64751	-13.5021
123	5	Prevalence	81	Federal Republic of Germany	3	Both	27	Age-standardized	682	Caries of permanent teeth	3	Rate	1990	2021	-14.1055	6.81985	-31.9859
124	5	Prevalence	136	Republic of Paraguay	3	Both	27	Age-standardized	682	Caries of permanent teeth	3	Rate	1990	2021	3.795	14.3022	-4.4916
125	5	Prevalence	92	Kingdom of Spain	3	Both	27	Age-standardized	682	Caries of permanent teeth	3	Rate	1990	2021	-10.297	-2.40851	-16.6204
126	5	Prevalence	87	Grand Duchy of Luxembourg	3	Both	27	Age-standardized	682	Caries of permanent teeth	3	Rate	1990	2021	-5.05908	1.72841	-11.6162
127	5	Prevalence	46	Republic of Croatia	3	Both	27	Age-standardized	682	Caries of permanent teeth	3	Rate	1990	2021	-9.84389	-3.33853	-18.6641
128	5	Prevalence	123	Republic of Peru	3	Both	27	Age-standardized	682	Caries of permanent teeth	3	Rate	1990	2021	-2.01487	3.61593	-6.80639
129	5	Prevalence	129	Republic of Honduras	3	Both	27	Age-standardized	682	Caries of permanent teeth	3	Rate	1990	2021	-2.20605	3.12483	-7.99331
130	5	Prevalence	57	Republic of Belarus	3	Both	27	Age-standardized	682	Caries of permanent teeth	3	Rate	1990	2021	-1.62086	5.13567	-8.56512
131	5	Prevalence	151	Qatar	3	Both	27	Age-standardized	682	Caries of permanent teeth	3	Rate	1990	2021	-1.53449	5.59331	-7.60555
132	5	Prevalence	116	Saint Lucia	3	Both	27	Age-standardized	682	Caries of permanent teeth	3	Rate	1990	2021	-4.36534	1.571	-9.20728
133	5	Prevalence	70	Australasia	3	Both	27	Age-standardized	682	Caries of permanent teeth	3	Rate	1990	2021	-13.43	-5.14856	-22.3592
134	5	Prevalence	59	Republic of Latvia	3	Both	27	Age-standardized	682	Caries of permanent teeth	3	Rate	1990	2021	-2.87529	2.36113	-8.77019
135	5	Prevalence	125	Republic of Colombia	3	Both	27	Age-standardized	682	Caries of permanent teeth	3	Rate	1990	2021	-4.4065	3.10647	-11.075
136	5	Prevalence	76	Kingdom of Belgium	3	Both	27	Age-standardized	682	Caries of permanent teeth	3	Rate	1990	2021	-4.12859	4.28589	-11.0202
137	5	Prevalence	24	Republic of the Marshall Islands	3	Both	27	Age-standardized	682	Caries of permanent teeth	3	Rate	1990	2021	-0.6032	5.31698	-6.73904
138	5	Prevalence	90	Kingdom of Norway	3	Both	27	Age-standardized	682	Caries of permanent teeth	3	Rate	1990	2021	-3.61569	-1.21815	-6.05732
139	5	Prevalence	114	Republic of Haiti	3	Both	27	Age-standardized	682	Caries of permanent teeth	3	Rate	1990	2021	-13.2847	6.11885	-28.8523
140	5	Prevalence	167	Central Sub-Saharan Africa	3	Both	27	Age-standardized	682	Caries of permanent teeth	3	Rate	1990	2021	1.37955	6.19911	-4.53467
141	5	Prevalence	248	Eastern Africa	3	Both	27	Age-standardized	682	Caries of permanent teeth	3	Rate	1990	2021	-4.67506	-2.38062	-6.75116
142	5	Prevalence	351	Guam	3	Both	27	Age-standardized	682	Caries of permanent teeth	3	Rate	1990	2021	-0.885706	5.37627	-8.36569
143	5	Prevalence	196	South Africa	3	Both	27	Age-standardized	682	Caries of permanent teeth	3	Rate	1990	2021	-6.87386	-2.77153	-10.3085
144	5	Prevalence	110	Commonwealth of Dominica	3	Both	27	Age-standardized	682	Caries of permanent teeth	3	Rate	1990	2021	-3.90714	2.20426	-9.15889
145	5	Prevalence	13	Malaysia	3	Both	27	Age-standardized	682	Caries of permanent teeth	3	Rate	1990	2021	-8.66098	-0.972498	-14.9502
146	5	Prevalence	127	Republic of El Salvador	3	Both	27	Age-standardized	682	Caries of permanent teeth	3	Rate	1990	2021	-4.4797	1.70893	-10.7742
147	5	Prevalence	37	Kyrgyz Republic	3	Both	27	Age-standardized	682	Caries of permanent teeth	3	Rate	1990	2021	0.676925	7.06774	-4.6048
148	5	Prevalence	156	United Arab Emirates	3	Both	27	Age-standardized	682	Caries of permanent teeth	3	Rate	1990	2021	0.92118	8.67708	-6.23769
149	5	Prevalence	413	Tokelau	3	Both	27	Age-standardized	682	Caries of permanent teeth	3	Rate	1990	2021	-3.07992	2.77902	-8.13906
150	5	Prevalence	145	State of Kuwait	3	Both	27	Age-standardized	682	Caries of permanent teeth	3	Rate	1990	2021	-2.28635	5.02318	-7.91507
151	5	Prevalence	99	Eastern Republic of Uruguay	3	Both	27	Age-standardized	682	Caries of permanent teeth	3	Rate	1990	2021	-1.71999	3.69018	-7.5803
152	5	Prevalence	48	Hungary	3	Both	27	Age-standardized	682	Caries of permanent teeth	3	Rate	1990	2021	-6.8331	1.15715	-14.3929
153	5	Prevalence	35	Georgia	3	Both	27	Age-standardized	682	Caries of permanent teeth	3	Rate	1990	2021	-0.145938	6.31975	-6.73515
154	5	Prevalence	393	Saint Kitts and Nevis	3	Both	27	Age-standardized	682	Caries of permanent teeth	3	Rate	1990	2021	-5.28375	0.896529	-10.8683
155	5	Prevalence	218	Togo	3	Both	27	Age-standardized	682	Caries of permanent teeth	3	Rate	1990	2021	-22.6221	0.376121	-39.0551
156	5	Prevalence	120	Andean Latin America	3	Both	27	Age-standardized	682	Caries of permanent teeth	3	Rate	1990	2021	-1.58707	1.80416	-4.83239
157	5	Prevalence	112	Grenada	3	Both	27	Age-standardized	682	Caries of permanent teeth	3	Rate	1990	2021	-5.36285	0.374948	-10.7024
158	5	Prevalence	134	Tropical Latin America	3	Both	27	Age-standardized	682	Caries of permanent teeth	3	Rate	1990	2021	-1.4166	1.23145	-3.81068
159	5	Prevalence	320	Cook Islands	3	Both	27	Age-standardized	682	Caries of permanent teeth	3	Rate	1990	2021	-3.30928	2.49528	-9.02668
160	5	Prevalence	165	Pakistan	3	Both	27	Age-standardized	682	Caries of permanent teeth	3	Rate	1990	2021	1.13271	6.43789	-3.16806
161	5	Prevalence	11	Republic of Indonesia	3	Both	27	Age-standardized	682	Caries of permanent teeth	3	Rate	1990	2021	-4.40432	-1.96358	-6.41937
162	5	Prevalence	194	Lesotho	3	Both	27	Age-standardized	682	Caries of permanent teeth	3	Rate	1990	2021	-4.76463	2.84717	-11.7902
163	5	Prevalence	261	Southern Africa	3	Both	27	Age-standardized	682	Caries of permanent teeth	3	Rate	1990	2021	-7.74703	-4.75865	-10.841
164	5	Prevalence	118	Republic of Suriname	3	Both	27	Age-standardized	682	Caries of permanent teeth	3	Rate	1990	2021	-3.86065	5.25435	-11.3313
165	5	Prevalence	374	Niue	3	Both	27	Age-standardized	682	Caries of permanent teeth	3	Rate	1990	2021	-2.16507	4.36165	-7.2012
166	5	Prevalence	180	Kenya	3	Both	27	Age-standardized	682	Caries of permanent teeth	3	Rate	1990	2021	-5.64139	-3.38515	-7.73712
167	5	Prevalence	182	Malawi	3	Both	27	Age-standardized	682	Caries of permanent teeth	3	Rate	1990	2021	-1.78183	4.7863	-7.98034
168	5	Prevalence	101	Canada	3	Both	27	Age-standardized	682	Caries of permanent teeth	3	Rate	1990	2021	-3.92975	5.69269	-11.3856
169	5	Prevalence	205	C么te d'Ivoire	3	Both	27	Age-standardized	682	Caries of permanent teeth	3	Rate	1990	2021	-2.14311	4.95915	-9.39041
170	5	Prevalence	44	Bosnia and Herzegovina	3	Both	27	Age-standardized	682	Caries of permanent teeth	3	Rate	1990	2021	-14.3877	-7.43229	-21.8354
171	5	Prevalence	154	Tunisia	3	Both	27	Age-standardized	682	Caries of permanent teeth	3	Rate	1990	2021	-2.95477	4.3458	-8.11595
172	5	Prevalence	68	Republic of Korea	3	Both	27	Age-standardized	682	Caries of permanent teeth	3	Rate	1990	2021	-7.5922	-1.4643	-14.44
173	5	Prevalence	216	Senegal	3	Both	27	Age-standardized	682	Caries of permanent teeth	3	Rate	1990	2021	-14.0978	-0.656865	-26.4209
174	5	Prevalence	22	Republic of Fiji	3	Both	27	Age-standardized	682	Caries of permanent teeth	3	Rate	1990	2021	-1.8601	4.33602	-7.38949
175	5	Prevalence	176	Comoros	3	Both	27	Age-standardized	682	Caries of permanent teeth	3	Rate	1990	2021	-10.9195	3.58753	-23.4367
176	5	Prevalence	163	India	3	Both	27	Age-standardized	682	Caries of permanent teeth	3	Rate	1990	2021	-6.06459	-3.66406	-8.03897
177	5	Prevalence	199	Western Sub-Saharan Africa	3	Both	27	Age-standardized	682	Caries of permanent teeth	3	Rate	1990	2021	-4.84532	-2.74678	-6.85453
178	5	Prevalence	201	Burkina Faso	3	Both	27	Age-standardized	682	Caries of permanent teeth	3	Rate	1990	2021	-3.18491	3.24581	-9.39287
179	5	Prevalence	42	Central Europe	3	Both	27	Age-standardized	682	Caries of permanent teeth	3	Rate	1990	2021	-8.94991	-5.81331	-11.5118
180	5	Prevalence	172	Equatorial Guinea	3	Both	27	Age-standardized	682	Caries of permanent teeth	3	Rate	1990	2021	-13.2637	-6.90081	-19.9828
181	5	Prevalence	64	High-income	3	Both	27	Age-standardized	682	Caries of permanent teeth	3	Rate	1990	2021	-7.86558	-4.54157	-10.8874
182	5	Prevalence	53	Republic of Serbia	3	Both	27	Age-standardized	682	Caries of permanent teeth	3	Rate	1990	2021	-12.8025	-4.19464	-21.7079
183	5	Prevalence	380	Palau	3	Both	27	Age-standardized	682	Caries of permanent teeth	3	Rate	1990	2021	-1.14395	4.47903	-6.08734
184	5	Prevalence	132	Republic of Panama	3	Both	27	Age-standardized	682	Caries of permanent teeth	3	Rate	1990	2021	-7.67782	-1.86887	-12.7306
185	5	Prevalence	33	Republic of Armenia	3	Both	27	Age-standardized	682	Caries of permanent teeth	3	Rate	1990	2021	-2.83847	2.46114	-8.56566
186	5	Prevalence	192	Southern Sub-Saharan Africa	3	Both	27	Age-standardized	682	Caries of permanent teeth	3	Rate	1990	2021	-5.52662	-2.51852	-8.61987
187	5	Prevalence	106	Commonwealth of the Bahamas	3	Both	27	Age-standardized	682	Caries of permanent teeth	3	Rate	1990	2021	-2.36049	3.82335	-7.53536
188	5	Prevalence	210	Liberia	3	Both	27	Age-standardized	682	Caries of permanent teeth	3	Rate	1990	2021	1.12137	9.16518	-5.61941
189	5	Prevalence	214	Nigeria	3	Both	27	Age-standardized	682	Caries of permanent teeth	3	Rate	1990	2021	-7.36906	-5.04638	-9.31941
190	5	Prevalence	143	Republic of Iraq	3	Both	27	Age-standardized	682	Caries of permanent teeth	3	Rate	1990	2021	-2.68041	3.32678	-9.60573
191	5	Prevalence	75	Republic of Austria	3	Both	27	Age-standardized	682	Caries of permanent teeth	3	Rate	1990	2021	-4.36653	2.76389	-10.7379
192	5	Prevalence	485	KwaZulu-Natal	3	Both	27	Age-standardized	682	Caries of permanent teeth	3	Rate	1990	2021	-7.38483	6.1162	-19.371
193	5	Prevalence	298	American Samoa	3	Both	27	Age-standardized	682	Caries of permanent teeth	3	Rate	1990	2021	1.72537	8.57371	-4.41527
194	5	Prevalence	435	South Sudan	3	Both	27	Age-standardized	682	Caries of permanent teeth	3	Rate	1990	2021	4.56446	11.7519	-2.17426
195	5	Prevalence	433	Northern Ireland	3	Both	27	Age-standardized	682	Caries of permanent teeth	3	Rate	1990	2021	-4.77248	2.43532	-11.5115
196	5	Prevalence	367	Monaco	3	Both	27	Age-standardized	682	Caries of permanent teeth	3	Rate	1990	2021	-5.26016	1.78031	-11.2111
197	5	Prevalence	190	Uganda	3	Both	27	Age-standardized	682	Caries of permanent teeth	3	Rate	1990	2021	-5.1511	2.04183	-11.7581
198	5	Prevalence	97	Argentine Republic	3	Both	27	Age-standardized	682	Caries of permanent teeth	3	Rate	1990	2021	1.45121	7.8703	-3.89956
199	5	Prevalence	174	Eastern Sub-Saharan Africa	3	Both	27	Age-standardized	682	Caries of permanent teeth	3	Rate	1990	2021	-6.90542	-4.71947	-9.117
200	5	Prevalence	108	Belize	3	Both	27	Age-standardized	682	Caries of permanent teeth	3	Rate	1990	2021	-18.1241	2.22827	-34.1246
201	5	Prevalence	241	Latin America & Caribbean - WB	3	Both	27	Age-standardized	682	Caries of permanent teeth	3	Rate	1990	2021	-2.88383	-0.94369	-4.77068
202	5	Prevalence	178	Eritrea	3	Both	27	Age-standardized	682	Caries of permanent teeth	3	Rate	1990	2021	1.08973	6.38928	-3.74186
203	5	Prevalence	203	Cabo Verde	3	Both	27	Age-standardized	682	Caries of permanent teeth	3	Rate	1990	2021	-6.94033	-1.0489	-13.229
204	5	Prevalence	208	Guinea	3	Both	27	Age-standardized	682	Caries of permanent teeth	3	Rate	1990	2021	-0.511344	6.96653	-6.94572
205	5	Prevalence	483	Free State	3	Both	27	Age-standardized	682	Caries of permanent teeth	3	Rate	1990	2021	-5.96149	1.48227	-12.5506
206	5	Prevalence	86	Republic of Italy	3	Both	27	Age-standardized	682	Caries of permanent teeth	3	Rate	1990	2021	-6.2371	-2.62428	-9.77441
207	5	Prevalence	187	Somalia	3	Both	27	Age-standardized	682	Caries of permanent teeth	3	Rate	1990	2021	0.889305	6.41151	-5.1994
208	5	Prevalence	243	Middle East & North Africa - WB	3	Both	27	Age-standardized	682	Caries of permanent teeth	3	Rate	1990	2021	-4.24998	-2.29229	-6.14359
209	5	Prevalence	185	Rwanda	3	Both	27	Age-standardized	682	Caries of permanent teeth	3	Rate	1990	2021	-4.58072	1.14633	-11.8454
210	5	Prevalence	150	Oman	3	Both	27	Age-standardized	682	Caries of permanent teeth	3	Rate	1990	2021	-2.93826	2.75403	-9.01568
211	5	Prevalence	212	Mauritania	3	Both	27	Age-standardized	682	Caries of permanent teeth	3	Rate	1990	2021	-2.22312	4.87439	-9.48535
212	5	Prevalence	88	Republic of Malta	3	Both	27	Age-standardized	682	Caries of permanent teeth	3	Rate	1990	2021	-6.99945	-1.67774	-12.5458
213	5	Prevalence	161	Bangladesh	3	Both	27	Age-standardized	682	Caries of permanent teeth	3	Rate	1990	2021	-3.94376	2.78236	-9.22412
214	5	Prevalence	527	California	3	Both	27	Age-standardized	682	Caries of permanent teeth	3	Rate	1990	2021	-7.99369	-0.876386	-14.8395
215	5	Prevalence	117	Saint Vincent and the Grenadines	3	Both	27	Age-standardized	682	Caries of permanent teeth	3	Rate	1990	2021	-13.5736	-6.72386	-20.7959
216	5	Prevalence	139	People's Democratic Republic of Algeria	3	Both	27	Age-standardized	682	Caries of permanent teeth	3	Rate	1990	2021	-1.34138	4.41988	-6.8901
217	5	Prevalence	152	Saudi Arabia	3	Both	27	Age-standardized	682	Caries of permanent teeth	3	Rate	1990	2021	-2.53557	2.73739	-7.54058
218	5	Prevalence	130	United Mexican States	3	Both	27	Age-standardized	682	Caries of permanent teeth	3	Rate	1990	2021	-6.03294	-2.82175	-8.55813
219	5	Prevalence	66	Brunei Darussalam	3	Both	27	Age-standardized	682	Caries of permanent teeth	3	Rate	1990	2021	1.50496	10.1392	-6.70209
220	5	Prevalence	77	Republic of Cyprus	3	Both	27	Age-standardized	682	Caries of permanent teeth	3	Rate	1990	2021	-4.62399	3.17026	-10.1348
221	5	Prevalence	547	Mississippi	3	Both	27	Age-standardized	682	Caries of permanent teeth	3	Rate	1990	2021	-7.46857	-0.381175	-14.1725
222	5	Prevalence	55	Republic of Slovenia	3	Both	27	Age-standardized	682	Caries of permanent teeth	3	Rate	1990	2021	-6.21882	0.490981	-13.6159
223	5	Prevalence	488	North-West	3	Both	27	Age-standardized	682	Caries of permanent teeth	3	Rate	1990	2021	-6.82391	-0.416958	-14.4266
224	5	Prevalence	170	Congo	3	Both	27	Age-standardized	682	Caries of permanent teeth	3	Rate	1990	2021	-1.25021	5.91862	-7.78619
225	5	Prevalence	479	WHO region	3	Both	27	Age-standardized	682	Caries of permanent teeth	3	Rate	1990	2021	-2.80185	-0.659794	-4.69904
226	5	Prevalence	549	Montana	3	Both	27	Age-standardized	682	Caries of permanent teeth	3	Rate	1990	2021	-2.21717	28.8679	-22.72
227	5	Prevalence	141	Arab Republic of Egypt	3	Both	27	Age-standardized	682	Caries of permanent teeth	3	Rate	1990	2021	-5.15191	2.12582	-12.2789
228	5	Prevalence	416	Tuvalu	3	Both	27	Age-standardized	682	Caries of permanent teeth	3	Rate	1990	2021	-3.60013	1.11189	-8.71576
229	5	Prevalence	396	San Marino	3	Both	27	Age-standardized	682	Caries of permanent teeth	3	Rate	1990	2021	-2.64333	4.7638	-9.2723
230	5	Prevalence	538	Iowa	3	Both	27	Age-standardized	682	Caries of permanent teeth	3	Rate	1990	2021	2.56544	12.8183	-5.71723
231	5	Prevalence	560	Oregon	3	Both	27	Age-standardized	682	Caries of permanent teeth	3	Rate	1990	2021	-7.94242	-0.170286	-16.5251
232	5	Prevalence	536	Illinois	3	Both	27	Age-standardized	682	Caries of permanent teeth	3	Rate	1990	2021	-8.01808	-0.320814	-15.7317
233	5	Prevalence	525	Arizona	3	Both	27	Age-standardized	682	Caries of permanent teeth	3	Rate	1990	2021	-7.25797	-1.06774	-13.5909
234	5	Prevalence	490	Western Cape	3	Both	27	Age-standardized	682	Caries of permanent teeth	3	Rate	1990	2021	-5.38576	0.652206	-11.7908
235	5	Prevalence	195	Namibia	3	Both	27	Age-standardized	682	Caries of permanent teeth	3	Rate	1990	2021	-1.12247	8.65182	-8.15413
236	5	Prevalence	121	Plurinational State of Bolivia	3	Both	27	Age-standardized	682	Caries of permanent teeth	3	Rate	1990	2021	-2.33997	2.66484	-6.83452
237	5	Prevalence	197	Eswatini	3	Both	27	Age-standardized	682	Caries of permanent teeth	3	Rate	1990	2021	-3.71662	4.20256	-10.5312
238	5	Prevalence	558	Ohio	3	Both	27	Age-standardized	682	Caries of permanent teeth	3	Rate	1990	2021	-7.37128	0.18374	-14.1576
239	5	Prevalence	263	Western Africa	3	Both	27	Age-standardized	682	Caries of permanent teeth	3	Rate	1990	2021	-5.74217	-3.37464	-7.82773
240	5	Prevalence	128	Republic of Guatemala	3	Both	27	Age-standardized	682	Caries of permanent teeth	3	Rate	1990	2021	-3.1551	2.03119	-9.6013
241	5	Prevalence	254	Northern Africa	3	Both	27	Age-standardized	682	Caries of permanent teeth	3	Rate	1990	2021	-8.43507	-4.25209	-12.1053
242	5	Prevalence	571	West Virginia	3	Both	27	Age-standardized	682	Caries of permanent teeth	3	Rate	1990	2021	7.32041	16.5804	-0.86138
243	5	Prevalence	569	Virginia	3	Both	27	Age-standardized	682	Caries of permanent teeth	3	Rate	1990	2021	-7.56616	0.246706	-14.0209
244	5	Prevalence	4624	Greater London	3	Both	27	Age-standardized	682	Caries of permanent teeth	3	Rate	1990	2021	-7.97129	-3.26671	-12.1123
245	5	Prevalence	523	Alabama	3	Both	27	Age-standardized	682	Caries of permanent teeth	3	Rate	1990	2021	-7.53615	1.15513	-14.9688
246	5	Prevalence	4626	South West England	3	Both	27	Age-standardized	682	Caries of permanent teeth	3	Rate	1990	2021	-2.89745	-0.715666	-4.94614
247	5	Prevalence	239	East Asia & Pacific - WB	3	Both	27	Age-standardized	682	Caries of permanent teeth	3	Rate	1990	2021	-0.242348	5.2256	-5.2408
248	5	Prevalence	217	Sierra Leone	3	Both	27	Age-standardized	682	Caries of permanent teeth	3	Rate	1990	2021	-19.5339	-8.7694	-29.8685
249	5	Prevalence	181	Madagascar	3	Both	27	Age-standardized	682	Caries of permanent teeth	3	Rate	1990	2021	-8.8892	-2.04452	-14.2603
250	5	Prevalence	545	Michigan	3	Both	27	Age-standardized	682	Caries of permanent teeth	3	Rate	1990	2021	14.0079	21.6791	6.36455
251	5	Prevalence	349	Greenland	3	Both	27	Age-standardized	682	Caries of permanent teeth	3	Rate	1990	2021	-3.74562	4.88831	-11.9125
252	5	Prevalence	183	Mauritius	3	Both	27	Age-standardized	682	Caries of permanent teeth	3	Rate	1990	2021	-6.47453	0.0289787	-11.8992
253	5	Prevalence	4650	Chihuahua	3	Both	27	Age-standardized	682	Caries of permanent teeth	3	Rate	1990	2021	-5.62435	1.41729	-13.8256
254	5	Prevalence	206	Gambia	3	Both	27	Age-standardized	682	Caries of permanent teeth	3	Rate	1990	2021	0.265313	7.11457	-5.91029
255	5	Prevalence	119	Republic of Trinidad and Tobago	3	Both	27	Age-standardized	682	Caries of permanent teeth	3	Rate	1990	2021	-23.9006	-3.50395	-39.3427
256	5	Prevalence	4661	Nuevo Le贸n	3	Both	27	Age-standardized	682	Caries of permanent teeth	3	Rate	1990	2021	-6.65525	-0.182174	-13.7352
257	5	Prevalence	532	Florida	3	Both	27	Age-standardized	682	Caries of permanent teeth	3	Rate	1990	2021	-6.94716	0.743084	-13.6964
258	5	Prevalence	556	North Carolina	3	Both	27	Age-standardized	682	Caries of permanent teeth	3	Rate	1990	2021	0.469143	32.2589	-21.6921
259	5	Prevalence	376	Northern Mariana Islands	3	Both	27	Age-standardized	682	Caries of permanent teeth	3	Rate	1990	2021	1.34535	8.5497	-4.9052
260	5	Prevalence	567	Utah	3	Both	27	Age-standardized	682	Caries of permanent teeth	3	Rate	1990	2021	-8.51777	-0.897569	-15.3579
261	5	Prevalence	4659	Morelos	3	Both	27	Age-standardized	682	Caries of permanent teeth	3	Rate	1990	2021	13.4227	22.9593	5.95354
262	5	Prevalence	193	Botswana	3	Both	27	Age-standardized	682	Caries of permanent teeth	3	Rate	1990	2021	-5.95765	1.18892	-13.2468
263	5	Prevalence	554	New Mexico	3	Both	27	Age-standardized	682	Caries of permanent teeth	3	Rate	1990	2021	-7.98309	0.99044	-14.7106
264	5	Prevalence	478	World Bank Regions	3	Both	27	Age-standardized	682	Caries of permanent teeth	3	Rate	1990	2021	-2.76305	-0.619229	-4.66287
265	5	Prevalence	534	Hawaii	3	Both	27	Age-standardized	682	Caries of permanent teeth	3	Rate	1990	2021	-7.43561	-1.47612	-13.7218
266	5	Prevalence	4648	Colima	3	Both	27	Age-standardized	682	Caries of permanent teeth	3	Rate	1990	2021	-5.90287	2.84283	-13.7589
267	5	Prevalence	543	Maryland	3	Both	27	Age-standardized	682	Caries of permanent teeth	3	Rate	1990	2021	-2.5307	27.4119	-23.6822
268	5	Prevalence	4670	Tamaulipas	3	Both	27	Age-standardized	682	Caries of permanent teeth	3	Rate	1990	2021	-5.58309	1.64224	-12.1053
269	5	Prevalence	369	Nauru	3	Both	27	Age-standardized	682	Caries of permanent teeth	3	Rate	1990	2021	1.78412	8.99551	-3.9472
270	5	Prevalence	486	Limpopo	3	Both	27	Age-standardized	682	Caries of permanent teeth	3	Rate	1990	2021	-15.5315	-7.03526	-24.6735
271	5	Prevalence	563	South Carolina	3	Both	27	Age-standardized	682	Caries of permanent teeth	3	Rate	1990	2021	-7.88884	-0.365505	-15.5677
272	5	Prevalence	541	Louisiana	3	Both	27	Age-standardized	682	Caries of permanent teeth	3	Rate	1990	2021	-1.24851	27.2605	-23.0967
273	5	Prevalence	385	Puerto Rico	3	Both	27	Age-standardized	682	Caries of permanent teeth	3	Rate	1990	2021	-2.79573	2.62636	-8.25111
274	5	Prevalence	4726	Bali	3	Both	27	Age-standardized	682	Caries of permanent teeth	3	Rate	1990	2021	-4.90327	1.51701	-10.3613
275	5	Prevalence	4622	West Midlands	3	Both	27	Age-standardized	682	Caries of permanent teeth	3	Rate	1990	2021	-8.06307	-1.8237	-13.5141
276	5	Prevalence	552	New Hampshire	3	Both	27	Age-standardized	682	Caries of permanent teeth	3	Rate	1990	2021	-8.23958	-0.618578	-15.2708
277	5	Prevalence	204	Chad	3	Both	27	Age-standardized	682	Caries of permanent teeth	3	Rate	1990	2021	-3.33469	3.48089	-8.53113
278	5	Prevalence	305	Bermuda	3	Both	27	Age-standardized	682	Caries of permanent teeth	3	Rate	1990	2021	-4.35304	2.13931	-10.3957
279	5	Prevalence	434	Scotland	3	Both	27	Age-standardized	682	Caries of permanent teeth	3	Rate	1990	2021	-8.39335	-3.55421	-14.5101
280	5	Prevalence	4620	Yorkshire and the Humber	3	Both	27	Age-standardized	682	Caries of permanent teeth	3	Rate	1990	2021	-7.60678	-2.71644	-11.5937
281	5	Prevalence	565	Tennessee	3	Both	27	Age-standardized	682	Caries of permanent teeth	3	Rate	1990	2021	1.45837	11.7395	-6.47326
282	5	Prevalence	4655	Hidalgo	3	Both	27	Age-standardized	682	Caries of permanent teeth	3	Rate	1990	2021	-6.66571	0.95914	-12.8038
283	5	Prevalence	4715	Bengkulu	3	Both	27	Age-standardized	682	Caries of permanent teeth	3	Rate	1990	2021	-4.9915	1.16936	-9.36608
284	5	Prevalence	528	Colorado	3	Both	27	Age-standardized	682	Caries of permanent teeth	3	Rate	1990	2021	-7.73329	0.272505	-15.499
285	5	Prevalence	215	Sao Tome and Principe	3	Both	27	Age-standardized	682	Caries of permanent teeth	3	Rate	1990	2021	-1.44642	6.19609	-7.56536
286	5	Prevalence	530	Delaware	3	Both	27	Age-standardized	682	Caries of permanent teeth	3	Rate	1990	2021	-7.21768	0.0418465	-13.935
287	5	Prevalence	484	Gauteng	3	Both	27	Age-standardized	682	Caries of permanent teeth	3	Rate	1990	2021	-4.21732	3.23356	-11.111
288	5	Prevalence	4728	East Nusa Tenggara	3	Both	27	Age-standardized	682	Caries of permanent teeth	3	Rate	1990	2021	-4.50377	1.4239	-9.29976
289	5	Prevalence	4618	North East England	3	Both	27	Age-standardized	682	Caries of permanent teeth	3	Rate	1990	2021	-2.53804	-0.453499	-4.31998
290	5	Prevalence	4672	Veracruz de Ignacio de la Llave	3	Both	27	Age-standardized	682	Caries of permanent teeth	3	Rate	1990	2021	-6.40473	6.29144	-16.5334
291	5	Prevalence	4644	Baja California	3	Both	27	Age-standardized	682	Caries of permanent teeth	3	Rate	1990	2021	-18.9878	-6.09256	-31.6476
292	5	Prevalence	4668	Sonora	3	Both	27	Age-standardized	682	Caries of permanent teeth	3	Rate	1990	2021	-7.08857	0.460643	-13.4376
293	5	Prevalence	4717	Bangka-Belitung Islands	3	Both	27	Age-standardized	682	Caries of permanent teeth	3	Rate	1990	2021	-4.62604	1.40643	-9.62637
294	5	Prevalence	482	Eastern Cape	3	Both	27	Age-standardized	682	Caries of permanent teeth	3	Rate	1990	2021	-6.37848	0.121186	-12.4429
295	5	Prevalence	522	Sudan	3	Both	27	Age-standardized	682	Caries of permanent teeth	3	Rate	1990	2021	-2.91118	3.13224	-8.69402
296	5	Prevalence	539	Kansas	3	Both	27	Age-standardized	682	Caries of permanent teeth	3	Rate	1990	2021	-7.49879	1.28239	-14.733
297	5	Prevalence	4657	M茅xico	3	Both	27	Age-standardized	682	Caries of permanent teeth	3	Rate	1990	2021	-5.14785	2.47586	-11.7731
298	5	Prevalence	4646	Campeche	3	Both	27	Age-standardized	682	Caries of permanent teeth	3	Rate	1990	2021	7.15297	14.7341	0.157186
299	5	Prevalence	550	Nebraska	3	Both	27	Age-standardized	682	Caries of permanent teeth	3	Rate	1990	2021	-8.4353	-1.33762	-15.7116
300	5	Prevalence	548	Missouri	3	Both	27	Age-standardized	682	Caries of permanent teeth	3	Rate	1990	2021	-7.94878	-1.13356	-15.1949
301	5	Prevalence	4724	East Java	3	Both	27	Age-standardized	682	Caries of permanent teeth	3	Rate	1990	2021	-6.26966	0.804589	-12.0046
302	5	Prevalence	4653	Guanajuato	3	Both	27	Age-standardized	682	Caries of permanent teeth	3	Rate	1990	2021	-8.40123	-0.389717	-14.5707
303	5	Prevalence	561	Pennsylvania	3	Both	27	Age-standardized	682	Caries of permanent teeth	3	Rate	1990	2021	5.74956	19.8379	-6.1656
304	5	Prevalence	489	Northern Cape	3	Both	27	Age-standardized	682	Caries of permanent teeth	3	Rate	1990	2021	-5.22094	3.72451	-11.6448
305	5	Prevalence	422	United States Virgin Islands	3	Both	27	Age-standardized	682	Caries of permanent teeth	3	Rate	1990	2021	-5.22154	1.35096	-10.5931
306	5	Prevalence	526	Arkansas	3	Both	27	Age-standardized	682	Caries of permanent teeth	3	Rate	1990	2021	-8.50245	-0.62484	-16.8158
307	5	Prevalence	524	Alaska	3	Both	27	Age-standardized	682	Caries of permanent teeth	3	Rate	1990	2021	-8.02106	-0.872884	-14.3565
308	5	Prevalence	4711	West Sumatra	3	Both	27	Age-standardized	682	Caries of permanent teeth	3	Rate	1990	2021	-6.17634	1.31562	-12.0215
309	5	Prevalence	572	Wisconsin	3	Both	27	Age-standardized	682	Caries of permanent teeth	3	Rate	1990	2021	-7.53966	0.23097	-14.5538
310	5	Prevalence	537	Indiana	3	Both	27	Age-standardized	682	Caries of permanent teeth	3	Rate	1990	2021	4.15114	33.9377	-17.2854
311	5	Prevalence	559	Oklahoma	3	Both	27	Age-standardized	682	Caries of permanent teeth	3	Rate	1990	2021	-7.40854	1.27155	-14.4516
312	5	Prevalence	570	Washington	3	Both	27	Age-standardized	682	Caries of permanent teeth	3	Rate	1990	2021	-8.06474	-1.01844	-14.9798
313	5	Prevalence	4713	Jambi	3	Both	27	Age-standardized	682	Caries of permanent teeth	3	Rate	1990	2021	-6.80225	-0.620679	-12.401
314	5	Prevalence	4709	Aceh	3	Both	27	Age-standardized	682	Caries of permanent teeth	3	Rate	1990	2021	-3.11463	3.43548	-9.27536
315	5	Prevalence	4651	Mexico City	3	Both	27	Age-standardized	682	Caries of permanent teeth	3	Rate	1990	2021	6.79898	13.9382	0.559656
316	5	Prevalence	4625	South East England	3	Both	27	Age-standardized	682	Caries of permanent teeth	3	Rate	1990	2021	-6.17676	-2.62735	-9.2706
317	5	Prevalence	4636	Wales	3	Both	27	Age-standardized	682	Caries of permanent teeth	3	Rate	1990	2021	-4.08343	1.79936	-9.79002
318	5	Prevalence	4662	Oaxaca	3	Both	27	Age-standardized	682	Caries of permanent teeth	3	Rate	1990	2021	-5.92316	0.869713	-13.15
319	5	Prevalence	4722	Central Java	3	Both	27	Age-standardized	682	Caries of permanent teeth	3	Rate	1990	2021	-5.8732	0.253416	-12.5381
320	5	Prevalence	533	Georgia	3	Both	27	Age-standardized	682	Caries of permanent teeth	3	Rate	1990	2021	-7.24931	-0.0201615	-14.6238
321	5	Prevalence	546	Minnesota	3	Both	27	Age-standardized	682	Caries of permanent teeth	3	Rate	1990	2021	-8.40473	-0.680655	-15.8993
322	5	Prevalence	568	Vermont	3	Both	27	Age-standardized	682	Caries of permanent teeth	3	Rate	1990	2021	-8.00277	0.860831	-15.3337
323	5	Prevalence	4664	Quer茅taro	3	Both	27	Age-standardized	682	Caries of permanent teeth	3	Rate	1990	2021	-7.62183	1.01222	-14.7737
324	5	Prevalence	4720	Jakarta	3	Both	27	Age-standardized	682	Caries of permanent teeth	3	Rate	1990	2021	-7.63048	-1.14399	-13.3943
325	5	Prevalence	557	North Dakota	3	Both	27	Age-standardized	682	Caries of permanent teeth	3	Rate	1990	2021	-9.59577	-2.75846	-16.5815
326	5	Prevalence	4666	San Luis Potos铆	3	Both	27	Age-standardized	682	Caries of permanent teeth	3	Rate	1990	2021	-7.12568	0.828742	-14.5925
327	5	Prevalence	4649	Chiapas	3	Both	27	Age-standardized	682	Caries of permanent teeth	3	Rate	1990	2021	-5.00595	2.05627	-11.2273
328	5	Prevalence	487	Mpumalanga	3	Both	27	Age-standardized	682	Caries of permanent teeth	3	Rate	1990	2021	-5.10976	1.45575	-12.6206
329	5	Prevalence	555	New York	3	Both	27	Age-standardized	682	Caries of permanent teeth	3	Rate	1990	2021	-7.20022	0.348032	-14.3151
330	5	Prevalence	4727	West Nusa Tenggara	3	Both	27	Age-standardized	682	Caries of permanent teeth	3	Rate	1990	2021	-7.07582	0.0339797	-12.2503
331	5	Prevalence	535	Idaho	3	Both	27	Age-standardized	682	Caries of permanent teeth	3	Rate	1990	2021	-0.732449	28.8649	-23.8488
332	5	Prevalence	4660	Nayarit	3	Both	27	Age-standardized	682	Caries of permanent teeth	3	Rate	1990	2021	-6.53871	1.58768	-13.5495
333	5	Prevalence	553	New Jersey	3	Both	27	Age-standardized	682	Caries of permanent teeth	3	Rate	1990	2021	-7.66872	-0.536392	-15.3805
334	5	Prevalence	564	South Dakota	3	Both	27	Age-standardized	682	Caries of permanent teeth	3	Rate	1990	2021	-8.43708	-1.03698	-15.2895
335	5	Prevalence	4623	East of England	3	Both	27	Age-standardized	682	Caries of permanent teeth	3	Rate	1990	2021	-7.60999	-3.3124	-11.3678
336	5	Prevalence	544	Massachusetts	3	Both	27	Age-standardized	682	Caries of permanent teeth	3	Rate	1990	2021	-8.21481	-1.0256	-15.39
337	5	Prevalence	4671	Tlaxcala	3	Both	27	Age-standardized	682	Caries of permanent teeth	3	Rate	1990	2021	-7.74811	1.60181	-14.2635
338	5	Prevalence	542	Maine	3	Both	27	Age-standardized	682	Caries of permanent teeth	3	Rate	1990	2021	-7.30344	1.45846	-14.7234
339	5	Prevalence	566	Texas	3	Both	27	Age-standardized	682	Caries of permanent teeth	3	Rate	1990	2021	-7.25423	0.764402	-13.9358
340	5	Prevalence	4656	Jalisco	3	Both	27	Age-standardized	682	Caries of permanent teeth	3	Rate	1990	2021	-6.72145	1.42443	-13.302
341	5	Prevalence	4621	East Midlands	3	Both	27	Age-standardized	682	Caries of permanent teeth	3	Rate	1990	2021	-7.98632	-3.14591	-12.0791
342	5	Prevalence	529	Connecticut	3	Both	27	Age-standardized	682	Caries of permanent teeth	3	Rate	1990	2021	-8.36647	-0.0444723	-15.4772
343	5	Prevalence	4619	North West England	3	Both	27	Age-standardized	682	Caries of permanent teeth	3	Rate	1990	2021	-8.40481	-3.34445	-12.5246
344	5	Prevalence	4716	Lampung	3	Both	27	Age-standardized	682	Caries of permanent teeth	3	Rate	1990	2021	-6.41765	-0.982023	-12.193
345	5	Prevalence	551	Nevada	3	Both	27	Age-standardized	682	Caries of permanent teeth	3	Rate	1990	2021	2.083	16.6787	-11.0668
346	5	Prevalence	4729	West Kalimantan	3	Both	27	Age-standardized	682	Caries of permanent teeth	3	Rate	1990	2021	-5.34747	1.26196	-11.2708
347	5	Prevalence	531	District of Columbia	3	Both	27	Age-standardized	682	Caries of permanent teeth	3	Rate	1990	2021	-8.66466	-0.816793	-15.5731
348	5	Prevalence	4673	Yucat谩n	3	Both	27	Age-standardized	682	Caries of permanent teeth	3	Rate	1990	2021	-7.34314	-0.177978	-14.0717
349	5	Prevalence	4669	Tabasco	3	Both	27	Age-standardized	682	Caries of permanent teeth	3	Rate	1990	2021	-5.25538	1.68304	-11.8949
350	5	Prevalence	4718	Riau Islands	3	Both	27	Age-standardized	682	Caries of permanent teeth	3	Rate	1990	2021	-3.83841	2.06928	-9.76075
351	5	Prevalence	4658	Michoac谩n de Ocampo	3	Both	27	Age-standardized	682	Caries of permanent teeth	3	Rate	1990	2021	-5.36906	2.60356	-11.4661
352	5	Prevalence	4654	Guerrero	3	Both	27	Age-standardized	682	Caries of permanent teeth	3	Rate	1990	2021	-4.20278	3.28493	-11.3361
353	5	Prevalence	540	Kentucky	3	Both	27	Age-standardized	682	Caries of permanent teeth	3	Rate	1990	2021	-7.8896	-0.552176	-15.7072
354	5	Prevalence	4647	Coahuila	3	Both	27	Age-standardized	682	Caries of permanent teeth	3	Rate	1990	2021	-6.94222	0.192657	-13.8268
355	5	Prevalence	4725	Banten	3	Both	27	Age-standardized	682	Caries of permanent teeth	3	Rate	1990	2021	-4.98474	1.29253	-11.5806
356	5	Prevalence	4645	Baja California Sur	3	Both	27	Age-standardized	682	Caries of permanent teeth	3	Rate	1990	2021	-6.40179	0.601904	-13.3533
357	5	Prevalence	4712	Riau	3	Both	27	Age-standardized	682	Caries of permanent teeth	3	Rate	1990	2021	-4.75653	2.24948	-10.7691
358	5	Prevalence	4714	South Sumatra	3	Both	27	Age-standardized	682	Caries of permanent teeth	3	Rate	1990	2021	-5.38273	1.02877	-10.6097
359	5	Prevalence	573	Wyoming	3	Both	27	Age-standardized	682	Caries of permanent teeth	3	Rate	1990	2021	-2.51511	27.0182	-24.076
360	5	Prevalence	562	Rhode Island	3	Both	27	Age-standardized	682	Caries of permanent teeth	3	Rate	1990	2021	-7.64103	0.689639	-14.964
361	5	Prevalence	4663	Puebla	3	Both	27	Age-standardized	682	Caries of permanent teeth	3	Rate	1990	2021	-6.17834	1.84765	-13.411
362	5	Prevalence	4665	Quintana Roo	3	Both	27	Age-standardized	682	Caries of permanent teeth	3	Rate	1990	2021	-6.96982	0.370752	-13.2711
363	5	Prevalence	4652	Durango	3	Both	27	Age-standardized	682	Caries of permanent teeth	3	Rate	1990	2021	-6.98704	1.07427	-14.7479
364	5	Prevalence	4643	Aguascalientes	3	Both	27	Age-standardized	682	Caries of permanent teeth	3	Rate	1990	2021	-5.44684	2.55459	-12.2177
365	5	Prevalence	4721	West Java	3	Both	27	Age-standardized	682	Caries of permanent teeth	3	Rate	1990	2021	0.960836	7.50513	-5.2035
366	5	Prevalence	4723	Yogyakarta	3	Both	27	Age-standardized	682	Caries of permanent teeth	3	Rate	1990	2021	-5.3585	1.44623	-11.9954
367	5	Prevalence	4667	Sinaloa	3	Both	27	Age-standardized	682	Caries of permanent teeth	3	Rate	1990	2021	-6.56952	0.500682	-13.1242
368	5	Prevalence	4710	North Sumatra	3	Both	27	Age-standardized	682	Caries of permanent teeth	3	Rate	1990	2021	-5.83674	0.129047	-11.173
369	5	Prevalence	4737	Gorontalo	3	Both	27	Age-standardized	682	Caries of permanent teeth	3	Rate	1990	2021	-4.56332	2.59154	-10.6602
370	5	Prevalence	4739	Maluku	3	Both	27	Age-standardized	682	Caries of permanent teeth	3	Rate	1990	2021	1.48037	7.83359	-6.15149
371	5	Prevalence	4735	South Sulawesi	3	Both	27	Age-standardized	682	Caries of permanent teeth	3	Rate	1990	2021	-5.83521	2.01146	-11.3704
372	5	Prevalence	4752	Amazonas	3	Both	27	Age-standardized	682	Caries of permanent teeth	3	Rate	1990	2021	-4.83897	1.30029	-10.4181
373	5	Prevalence	4730	Central Kalimantan	3	Both	27	Age-standardized	682	Caries of permanent teeth	3	Rate	1990	2021	-5.37925	0.918103	-11.0655
374	5	Prevalence	4719	North Kalimantan	3	Both	27	Age-standardized	682	Caries of permanent teeth	3	Rate	1990	2021	-6.37072	0.0171684	-12.3922
375	5	Prevalence	4761	Mato Grosso do Sul	3	Both	27	Age-standardized	682	Caries of permanent teeth	3	Rate	1990	2021	-0.0869509	6.21451	-5.80202
376	5	Prevalence	4763	Par谩	3	Both	27	Age-standardized	682	Caries of permanent teeth	3	Rate	1990	2021	-5.76335	0.241955	-10.9389
377	5	Prevalence	4772	Rio Grande do Sul	3	Both	27	Age-standardized	682	Caries of permanent teeth	3	Rate	1990	2021	1.36368	8.50984	-4.74586
378	5	Prevalence	4774	Sergipe	3	Both	27	Age-standardized	682	Caries of permanent teeth	3	Rate	1990	2021	-6.50467	-0.153482	-11.9998
379	5	Prevalence	4750	Acre	3	Both	27	Age-standardized	682	Caries of permanent teeth	3	Rate	1990	2021	-7.07037	-0.874807	-12.8729
380	5	Prevalence	4733	North Sulawesi	3	Both	27	Age-standardized	682	Caries of permanent teeth	3	Rate	1990	2021	-6.04174	0.408566	-11.8811
381	5	Prevalence	4674	Zacatecas	3	Both	27	Age-standardized	682	Caries of permanent teeth	3	Rate	1990	2021	-5.82154	0.850449	-12.9147
382	5	Prevalence	4850	Goa	3	Both	27	Age-standardized	682	Caries of permanent teeth	3	Rate	1990	2021	-9.04518	-3.42564	-14.8338
383	5	Prevalence	4852	Haryana	3	Both	27	Age-standardized	682	Caries of permanent teeth	3	Rate	1990	2021	-6.74435	-0.92915	-11.6425
384	5	Prevalence	4874	Uttarakhand	3	Both	27	Age-standardized	682	Caries of permanent teeth	3	Rate	1990	2021	-7.65459	-2.21779	-12.7384
385	5	Prevalence	4731	South Kalimantan	3	Both	27	Age-standardized	682	Caries of permanent teeth	3	Rate	1990	2021	-5.19728	0.323665	-10.2139
386	5	Prevalence	4862	Meghalaya	3	Both	27	Age-standardized	682	Caries of permanent teeth	3	Rate	1990	2021	-5.42583	-0.440634	-9.78294
387	5	Prevalence	4745		3	Both	27	Age-standardized	682	Caries of permanent teeth	3	Rate	1990	2021	-4.3493	-2.14462	-6.57409
388	5	Prevalence	4759	Maranh茫o	3	Both	27	Age-standardized	682	Caries of permanent teeth	3	Rate	1990	2021	-8.90077	-2.40125	-16.1011
389	5	Prevalence	4770	Rond么nia	3	Both	27	Age-standardized	682	Caries of permanent teeth	3	Rate	1990	2021	-2.54569	4.24582	-7.82002
390	5	Prevalence	4742	Papua	3	Both	27	Age-standardized	682	Caries of permanent teeth	3	Rate	1990	2021	-5.38961	1.71777	-11.2341
391	5	Prevalence	4757	Esp铆rito Santo	3	Both	27	Age-standardized	682	Caries of permanent teeth	3	Rate	1990	2021	-8.49391	-1.57432	-15.7918
392	5	Prevalence	4864	Nagaland	3	Both	27	Age-standardized	682	Caries of permanent teeth	3	Rate	1990	2021	-5.81422	4.22518	-14.1955
393	5	Prevalence	4910	Oslo	3	Both	27	Age-standardized	682	Caries of permanent teeth	3	Rate	1990	2021	-2.98713	3.25625	-8.78185
394	5	Prevalence	4846	Chhattisgarh	3	Both	27	Age-standardized	682	Caries of permanent teeth	3	Rate	1990	2021	-5.8265	-0.967697	-9.88649
395	5	Prevalence	4768	Rio de Janeiro	3	Both	27	Age-standardized	682	Caries of permanent teeth	3	Rate	1990	2021	-6.63078	-1.03614	-13.0431
396	5	Prevalence	4766	Pernambuco	3	Both	27	Age-standardized	682	Caries of permanent teeth	3	Rate	1990	2021	0.329899	6.71351	-5.48703
397	5	Prevalence	4738	West Sulawesi	3	Both	27	Age-standardized	682	Caries of permanent teeth	3	Rate	1990	2021	-4.40953	0.770696	-9.98885
398	5	Prevalence	4860	Maharashtra	3	Both	27	Age-standardized	682	Caries of permanent teeth	3	Rate	1990	2021	-6.1433	-1.40046	-10.152
399	5	Prevalence	4872	Tripura	3	Both	27	Age-standardized	682	Caries of permanent teeth	3	Rate	1990	2021	-6.70551	-0.789218	-11.9055
400	5	Prevalence	4841	Andhra Pradesh	3	Both	27	Age-standardized	682	Caries of permanent teeth	3	Rate	1990	2021	-8.19083	-2.79646	-12.9631
401	5	Prevalence	4755	Cear谩	3	Both	27	Age-standardized	682	Caries of permanent teeth	3	Rate	1990	2021	-8.1186	-2.16214	-13.8551
402	5	Prevalence	4857	Kerala	3	Both	27	Age-standardized	682	Caries of permanent teeth	3	Rate	1990	2021	-9.64483	0.410184	-18.5788
403	5	Prevalence	4843	Assam	3	Both	27	Age-standardized	682	Caries of permanent teeth	3	Rate	1990	2021	-5.80347	-0.816233	-10.7708
404	5	Prevalence	4855	Jharkhand	3	Both	27	Age-standardized	682	Caries of permanent teeth	3	Rate	1990	2021	-4.88531	3.67141	-11.719
405	5	Prevalence	4926	Nordland	3	Both	27	Age-standardized	682	Caries of permanent teeth	3	Rate	1990	2021	-2.86285	4.38986	-10.0215
406	5	Prevalence	4753	Amap谩	3	Both	27	Age-standardized	682	Caries of permanent teeth	3	Rate	1990	2021	-6.16628	0.2628	-11.6819
407	5	Prevalence	4773	Santa Catarina	3	Both	27	Age-standardized	682	Caries of permanent teeth	3	Rate	1990	2021	-0.789606	4.85226	-6.13123
408	5	Prevalence	4740	North Maluku	3	Both	27	Age-standardized	682	Caries of permanent teeth	3	Rate	1990	2021	-4.21733	1.54535	-9.1369
409	5	Prevalence	4870	Tamil Nadu	3	Both	27	Age-standardized	682	Caries of permanent teeth	3	Rate	1990	2021	-8.69402	-3.90178	-12.9271
410	5	Prevalence	4851	Gujarat	3	Both	27	Age-standardized	682	Caries of permanent teeth	3	Rate	1990	2021	-7.30031	-2.88351	-11.0613
411	5	Prevalence	4762	Mato Grosso	3	Both	27	Age-standardized	682	Caries of permanent teeth	3	Rate	1990	2021	-8.76043	-3.06991	-14.0342
412	5	Prevalence	4734	Central Sulawesi	3	Both	27	Age-standardized	682	Caries of permanent teeth	3	Rate	1990	2021	-6.89564	0.215677	-12.6973
413	5	Prevalence	4751	Alagoas	3	Both	27	Age-standardized	682	Caries of permanent teeth	3	Rate	1990	2021	-5.43499	0.85902	-11.86
414	5	Prevalence	4764	Para铆ba	3	Both	27	Age-standardized	682	Caries of permanent teeth	3	Rate	1990	2021	-7.61228	-1.68975	-13.8216
415	5	Prevalence	4944	Stockholm	3	Both	27	Age-standardized	682	Caries of permanent teeth	3	Rate	1990	2021	32.3671	61.7176	12.9899
416	5	Prevalence	4775	S茫o Paulo	3	Both	27	Age-standardized	682	Caries of permanent teeth	3	Rate	1990	2021	2.06278	9.65244	-4.21672
417	5	Prevalence	4736	Southeast Sulawesi	3	Both	27	Age-standardized	682	Caries of permanent teeth	3	Rate	1990	2021	-6.14726	-0.172946	-11.0708
418	5	Prevalence	4853	Himachal Pradesh	3	Both	27	Age-standardized	682	Caries of permanent teeth	3	Rate	1990	2021	-7.51424	-1.4181	-12.5665
419	5	Prevalence	4868	Rajasthan	3	Both	27	Age-standardized	682	Caries of permanent teeth	3	Rate	1990	2021	-7.31405	-2.2506	-12.8473
420	5	Prevalence	4749	England	3	Both	27	Age-standardized	682	Caries of permanent teeth	3	Rate	1990	2021	-7.3112	-3.52456	-10.5895
421	5	Prevalence	4875	West Bengal	3	Both	27	Age-standardized	682	Caries of permanent teeth	3	Rate	1990	2021	-5.09955	0.670478	-10.3033
422	5	Prevalence	4758	Goi谩s	3	Both	27	Age-standardized	682	Caries of permanent teeth	3	Rate	1990	2021	-8.69444	-1.649	-15.3418
423	5	Prevalence	4732	East Kalimantan	3	Both	27	Age-standardized	682	Caries of permanent teeth	3	Rate	1990	2021	-5.42232	0.621946	-12.4313
424	5	Prevalence	4760	Minas Gerais	3	Both	27	Age-standardized	682	Caries of permanent teeth	3	Rate	1990	2021	8.29302	16.7126	1.12343
425	5	Prevalence	4865	Odisha	3	Both	27	Age-standardized	682	Caries of permanent teeth	3	Rate	1990	2021	-6.73908	-1.27257	-11.5288
426	5	Prevalence	4863	Mizoram	3	Both	27	Age-standardized	682	Caries of permanent teeth	3	Rate	1990	2021	-6.82786	-1.82336	-11.0161
427	5	Prevalence	4849	Delhi	3	Both	27	Age-standardized	682	Caries of permanent teeth	3	Rate	1990	2021	-3.83118	2.11063	-9.4269
428	5	Prevalence	4743	European Union	3	Both	27	Age-standardized	682	Caries of permanent teeth	3	Rate	1990	2021	-9.71732	-5.52259	-13.8703
429	5	Prevalence	4771	Roraima	3	Both	27	Age-standardized	682	Caries of permanent teeth	3	Rate	1990	2021	-6.22478	-0.247198	-12.4057
430	5	Prevalence	4767	Piaui	3	Both	27	Age-standardized	682	Caries of permanent teeth	3	Rate	1990	2021	-8.76726	-2.74737	-14.3999
431	5	Prevalence	4769	Rio Grande do Norte	3	Both	27	Age-standardized	682	Caries of permanent teeth	3	Rate	1990	2021	-7.70417	-2.12394	-14.0022
432	5	Prevalence	4920	Rogaland	3	Both	27	Age-standardized	682	Caries of permanent teeth	3	Rate	1990	2021	-2.53079	4.97653	-8.64158
433	5	Prevalence	4873	Uttar Pradesh	3	Both	27	Age-standardized	682	Caries of permanent teeth	3	Rate	1990	2021	-4.24608	0.220504	-9.05211
434	5	Prevalence	4861	Manipur	3	Both	27	Age-standardized	682	Caries of permanent teeth	3	Rate	1990	2021	-4.12986	0.377374	-8.38254
435	5	Prevalence	4756	Distrito Federal	3	Both	27	Age-standardized	682	Caries of permanent teeth	3	Rate	1990	2021	-8.72653	-2.01482	-14.9348
436	5	Prevalence	4859	Madhya Pradesh	3	Both	27	Age-standardized	682	Caries of permanent teeth	3	Rate	1990	2021	-8.14169	-3.3113	-12.4496
437	5	Prevalence	4842	Arunachal Pradesh	3	Both	27	Age-standardized	682	Caries of permanent teeth	3	Rate	1990	2021	-5.78881	0.150965	-11.8062
438	5	Prevalence	4844	Bihar	3	Both	27	Age-standardized	682	Caries of permanent teeth	3	Rate	1990	2021	-2.21311	3.29425	-7.46982
439	5	Prevalence	4754	Bahia	3	Both	27	Age-standardized	682	Caries of permanent teeth	3	Rate	1990	2021	-5.93967	-0.396491	-11.538
440	5	Prevalence	4940	Sweden except Stockholm	3	Both	27	Age-standardized	682	Caries of permanent teeth	3	Rate	1990	2021	4.86665	13.9464	-3.08856
441	5	Prevalence	4856	Karnataka	3	Both	27	Age-standardized	682	Caries of permanent teeth	3	Rate	1990	2021	-8.51665	14.9046	-27.0363
442	5	Prevalence	4765	Paran谩	3	Both	27	Age-standardized	682	Caries of permanent teeth	3	Rate	1990	2021	-0.0505689	5.66997	-5.98468
443	5	Prevalence	4741	West Papua	3	Both	27	Age-standardized	682	Caries of permanent teeth	3	Rate	1990	2021	-5.6626	0.0596497	-11.3332
444	5	Prevalence	4871	Telangana	3	Both	27	Age-standardized	682	Caries of permanent teeth	3	Rate	1990	2021	-9.1736	-4.14048	-14.0826
445	5	Prevalence	4854	Jammu & Kashmir and Ladakh	3	Both	27	Age-standardized	682	Caries of permanent teeth	3	Rate	1990	2021	-6.05512	0.00369624	-11.4782
446	5	Prevalence	4776	Tocantins	3	Both	27	Age-standardized	682	Caries of permanent teeth	3	Rate	1990	2021	-8.95741	-2.20387	-15.3016
447	5	Prevalence	4869	Sikkim	3	Both	27	Age-standardized	682	Caries of permanent teeth	3	Rate	1990	2021	-10.4596	-4.52277	-16.1041
448	5	Prevalence	4867	Punjab	3	Both	27	Age-standardized	682	Caries of permanent teeth	3	Rate	1990	2021	-4.78602	0.198699	-10.1972
449	5	Prevalence	4923	M酶re og Romsdal	3	Both	27	Age-standardized	682	Caries of permanent teeth	3	Rate	1990	2021	-2.90726	3.86602	-8.97799
450	5	Prevalence	35432	Tochigi	3	Both	27	Age-standardized	682	Caries of permanent teeth	3	Rate	1990	2021	-16.6786	-8.40426	-23.8457
451	5	Prevalence	35434	Saitama	3	Both	27	Age-standardized	682	Caries of permanent teeth	3	Rate	1990	2021	-16.5129	-8.1346	-24.285
452	5	Prevalence	35445	Shizuoka	3	Both	27	Age-standardized	682	Caries of permanent teeth	3	Rate	1990	2021	-16.3081	-7.799	-24.3807
453	5	Prevalence	35443	Nagano	3	Both	27	Age-standardized	682	Caries of permanent teeth	3	Rate	1990	2021	-16.7574	-8.87419	-25.8942
454	5	Prevalence	35454	Tottori	3	Both	27	Age-standardized	682	Caries of permanent teeth	3	Rate	1990	2021	-15.4387	-7.36483	-24.2529
455	5	Prevalence	35441	Fukui	3	Both	27	Age-standardized	682	Caries of permanent teeth	3	Rate	1990	2021	-16.0642	-5.90888	-24.2937
456	5	Prevalence	35428	Akita	3	Both	27	Age-standardized	682	Caries of permanent teeth	3	Rate	1990	2021	-16.7305	-7.84612	-23.7363
457	5	Prevalence	35452	Nara	3	Both	27	Age-standardized	682	Caries of permanent teeth	3	Rate	1990	2021	-16.5044	-9.02601	-23.7243
458	5	Prevalence	35426	Iwate	3	Both	27	Age-standardized	682	Caries of permanent teeth	3	Rate	1990	2021	-39.9243	-18.8799	-54.4038
459	5	Prevalence	35430	Fukushima	3	Both	27	Age-standardized	682	Caries of permanent teeth	3	Rate	1990	2021	-39.206	-20.0782	-55.1024
460	5	Prevalence	35465	Nagasaki	3	Both	27	Age-standardized	682	Caries of permanent teeth	3	Rate	1990	2021	-16.3953	-10.1077	-23.7274
461	5	Prevalence	35448	Shiga	3	Both	27	Age-standardized	682	Caries of permanent teeth	3	Rate	1990	2021	-16.5603	-9.12625	-24.1596
462	5	Prevalence	35463	Fukuoka	3	Both	27	Age-standardized	682	Caries of permanent teeth	3	Rate	1990	2021	-15.9517	-8.53201	-23.6709
463	5	Prevalence	35439	Toyama	3	Both	27	Age-standardized	682	Caries of permanent teeth	3	Rate	1990	2021	-29.5959	-17.741	-41.6845
464	5	Prevalence	35459	Tokushima	3	Both	27	Age-standardized	682	Caries of permanent teeth	3	Rate	1990	2021	-17.4334	-10.6941	-24.5826
465	5	Prevalence	35634	Kitui	3	Both	27	Age-standardized	682	Caries of permanent teeth	3	Rate	1990	2021	-1.68395	4.59254	-8.08467
466	5	Prevalence	35621	Elgeyo-Marakwet	3	Both	27	Age-standardized	682	Caries of permanent teeth	3	Rate	1990	2021	-1.269	5.94908	-7.43607
467	5	Prevalence	35433	Gunma	3	Both	27	Age-standardized	682	Caries of permanent teeth	3	Rate	1990	2021	-17.305	-8.50021	-25.9139
468	5	Prevalence	35435	Chiba	3	Both	27	Age-standardized	682	Caries of permanent teeth	3	Rate	1990	2021	-17.9172	-10.3097	-24.0588
469	5	Prevalence	35623	Garissa	3	Both	27	Age-standardized	682	Caries of permanent teeth	3	Rate	1990	2021	-1.04799	6.63447	-6.80501
470	5	Prevalence	35632	Kisii	3	Both	27	Age-standardized	682	Caries of permanent teeth	3	Rate	1990	2021	-1.16266	5.50809	-7.86888
471	5	Prevalence	35470	Okinawa	3	Both	27	Age-standardized	682	Caries of permanent teeth	3	Rate	1990	2021	-16.3598	-8.30116	-23.9239
472	5	Prevalence	35444	Gifu	3	Both	27	Age-standardized	682	Caries of permanent teeth	3	Rate	1990	2021	-16.0267	-7.78991	-24.5414
473	5	Prevalence	35461	Ehime	3	Both	27	Age-standardized	682	Caries of permanent teeth	3	Rate	1990	2021	-17.9558	-10.7886	-25.5919
474	5	Prevalence	35437	Kanagawa	3	Both	27	Age-standardized	682	Caries of permanent teeth	3	Rate	1990	2021	-29.4964	-16.0893	-42.7061
475	5	Prevalence	35446	Aichi	3	Both	27	Age-standardized	682	Caries of permanent teeth	3	Rate	1990	2021	-16.0208	-6.35778	-23.842
476	5	Prevalence	35630	Kilifi	3	Both	27	Age-standardized	682	Caries of permanent teeth	3	Rate	1990	2021	-1.92842	4.5823	-7.8156
477	5	Prevalence	35643	Migori	3	Both	27	Age-standardized	682	Caries of permanent teeth	3	Rate	1990	2021	-27.249	-15.1725	-38.828
478	5	Prevalence	35450	艑saka	3	Both	27	Age-standardized	682	Caries of permanent teeth	3	Rate	1990	2021	-16.4187	-8.5898	-26.7024
479	5	Prevalence	35424	Hokkaid艒	3	Both	27	Age-standardized	682	Caries of permanent teeth	3	Rate	1990	2021	-16.5597	-8.61081	-24.4043
480	5	Prevalence	35617	Baringo	3	Both	27	Age-standardized	682	Caries of permanent teeth	3	Rate	1990	2021	-1.29709	5.73435	-7.6547
481	5	Prevalence	35641	Marsabit	3	Both	27	Age-standardized	682	Caries of permanent teeth	3	Rate	1990	2021	-0.954494	4.6524	-6.9107
482	5	Prevalence	35637	Lamu	3	Both	27	Age-standardized	682	Caries of permanent teeth	3	Rate	1990	2021	-0.553691	7.04646	-6.82096
483	5	Prevalence	35429	Yamagata	3	Both	27	Age-standardized	682	Caries of permanent teeth	3	Rate	1990	2021	-17.5801	-10.163	-25.0025
484	5	Prevalence	35453	Wakayama	3	Both	27	Age-standardized	682	Caries of permanent teeth	3	Rate	1990	2021	-16.9556	-8.13081	-25.0788
485	5	Prevalence	35626	Kajiado	3	Both	27	Age-standardized	682	Caries of permanent teeth	3	Rate	1990	2021	-0.843769	6.19105	-7.42576
486	5	Prevalence	35628	Kericho	3	Both	27	Age-standardized	682	Caries of permanent teeth	3	Rate	1990	2021	-0.564439	4.86953	-5.98824
487	5	Prevalence	35427	Miyagi	3	Both	27	Age-standardized	682	Caries of permanent teeth	3	Rate	1990	2021	-15.8616	-6.85896	-23.1496
488	5	Prevalence	35442	Yamanashi	3	Both	27	Age-standardized	682	Caries of permanent teeth	3	Rate	1990	2021	-16.7026	-9.2175	-23.9856
489	5	Prevalence	35455	Shimane	3	Both	27	Age-standardized	682	Caries of permanent teeth	3	Rate	1990	2021	-16.8792	-8.94005	-24.7366
490	5	Prevalence	35466	Kumamoto	3	Both	27	Age-standardized	682	Caries of permanent teeth	3	Rate	1990	2021	-15.4225	-7.70751	-22.9233
491	5	Prevalence	35654	Siaya	3	Both	27	Age-standardized	682	Caries of permanent teeth	3	Rate	1990	2021	-12.1442	-5.73423	-18.6233
492	5	Prevalence	35652	Nyeri	3	Both	27	Age-standardized	682	Caries of permanent teeth	3	Rate	1990	2021	14.1641	25.2082	3.97024
493	5	Prevalence	35464	Saga	3	Both	27	Age-standardized	682	Caries of permanent teeth	3	Rate	1990	2021	-39.0273	-20.1746	-54.0584
494	5	Prevalence	35449	Ky艒to	3	Both	27	Age-standardized	682	Caries of permanent teeth	3	Rate	1990	2021	-15.7566	-7.08677	-25.823
495	5	Prevalence	35440	Ishikawa	3	Both	27	Age-standardized	682	Caries of permanent teeth	3	Rate	1990	2021	-16.0202	-7.56484	-28.8871
496	5	Prevalence	35460	Kagawa	3	Both	27	Age-standardized	682	Caries of permanent teeth	3	Rate	1990	2021	-29.8805	-16.3734	-41.9556
497	5	Prevalence	35622	Embu	3	Both	27	Age-standardized	682	Caries of permanent teeth	3	Rate	1990	2021	-2.10997	4.126	-7.74994
498	5	Prevalence	35639	Makueni	3	Both	27	Age-standardized	682	Caries of permanent teeth	3	Rate	1990	2021	-0.787155	6.16139	-7.84618
499	5	Prevalence	35650	Nyamira	3	Both	27	Age-standardized	682	Caries of permanent teeth	3	Rate	1990	2021	-11.0889	-3.25137	-18.6694
500	5	Prevalence	35431	Ibaraki	3	Both	27	Age-standardized	682	Caries of permanent teeth	3	Rate	1990	2021	-17.2495	-9.63144	-25.9043
501	5	Prevalence	35619	Bungoma	3	Both	27	Age-standardized	682	Caries of permanent teeth	3	Rate	1990	2021	-1.70278	4.09595	-7.67845
502	5	Prevalence	35663	West Pokot	3	Both	27	Age-standardized	682	Caries of permanent teeth	3	Rate	1990	2021	-0.535744	5.51282	-6.109
503	5	Prevalence	35635	Kwale	3	Both	27	Age-standardized	682	Caries of permanent teeth	3	Rate	1990	2021	-0.669007	7.2138	-6.75875
504	5	Prevalence	35624	Homa Bay	3	Both	27	Age-standardized	682	Caries of permanent teeth	3	Rate	1990	2021	-1.70728	5.42556	-8.50693
505	5	Prevalence	35436	T艒ky艒	3	Both	27	Age-standardized	682	Caries of permanent teeth	3	Rate	1990	2021	-40.4706	-19.6459	-57.0942
506	5	Prevalence	35468	Miyazaki	3	Both	27	Age-standardized	682	Caries of permanent teeth	3	Rate	1990	2021	-16.3281	-7.76304	-23.4938
507	5	Prevalence	35648	Nandi	3	Both	27	Age-standardized	682	Caries of permanent teeth	3	Rate	1990	2021	-10.3785	-2.95584	-17.7602
508	5	Prevalence	35633	Kisumu	3	Both	27	Age-standardized	682	Caries of permanent teeth	3	Rate	1990	2021	-0.277167	6.9661	-6.19513
509	5	Prevalence	35457	Hiroshima	3	Both	27	Age-standardized	682	Caries of permanent teeth	3	Rate	1990	2021	-30.5674	-12.042	-45.6258
510	5	Prevalence	44591	World Bank Income Levels	3	Both	27	Age-standardized	682	Caries of permanent teeth	3	Rate	1990	2021	-2.77169	-0.628494	-4.67209
511	5	Prevalence	35631	Kirinyaga	3	Both	27	Age-standardized	682	Caries of permanent teeth	3	Rate	1990	2021	-1.19368	5.64033	-7.05951
512	5	Prevalence	35462	K艒chi	3	Both	27	Age-standardized	682	Caries of permanent teeth	3	Rate	1990	2021	-15.9472	-8.6605	-23.0801
513	5	Prevalence	35661	Vihiga	3	Both	27	Age-standardized	682	Caries of permanent teeth	3	Rate	1990	2021	-0.945916	5.64279	-7.30595
514	5	Prevalence	35447	Mie	3	Both	27	Age-standardized	682	Caries of permanent teeth	3	Rate	1990	2021	-17.3478	-9.61816	-25.2405
515	5	Prevalence	35644	Mombasa	3	Both	27	Age-standardized	682	Caries of permanent teeth	3	Rate	1990	2021	-1.69075	4.49004	-7.449
516	5	Prevalence	35646	Nairobi	3	Both	27	Age-standardized	682	Caries of permanent teeth	3	Rate	1990	2021	5.52448	17.3517	-4.91299
517	5	Prevalence	35659	Turkana	3	Both	27	Age-standardized	682	Caries of permanent teeth	3	Rate	1990	2021	-10.3869	-0.766212	-18.2893
518	5	Prevalence	35657	Tharaka Nithi	3	Both	27	Age-standardized	682	Caries of permanent teeth	3	Rate	1990	2021	-1.78785	4.41187	-7.90991
519	5	Prevalence	44566	European Region	3	Both	27	Age-standardized	682	Caries of permanent teeth	3	Rate	1990	2021	-5.93637	-3.62191	-8.37755
520	5	Prevalence	44568	Western Pacific Region	3	Both	27	Age-standardized	682	Caries of permanent teeth	3	Rate	1990	2021	-0.123885	6.79595	-6.42591
521	5	Prevalence	35618	Bomet	3	Both	27	Age-standardized	682	Caries of permanent teeth	3	Rate	1990	2021	-0.948128	4.96629	-6.96354
522	5	Prevalence	35642	Meru	3	Both	27	Age-standardized	682	Caries of permanent teeth	3	Rate	1990	2021	-29.5194	-17.6745	-41.4209
523	5	Prevalence	44535	Commonwealth High Income	3	Both	27	Age-standardized	682	Caries of permanent teeth	3	Rate	1990	2021	-10.0114	-7.43924	-12.6218
524	5	Prevalence	35629	Kiambu	3	Both	27	Age-standardized	682	Caries of permanent teeth	3	Rate	1990	2021	0.0355411	7.38468	-7.33322
525	5	Prevalence	35627	Kakamega	3	Both	27	Age-standardized	682	Caries of permanent teeth	3	Rate	1990	2021	-1.2925	5.04094	-7.57358
526	5	Prevalence	35451	Hy艒go	3	Both	27	Age-standardized	682	Caries of permanent teeth	3	Rate	1990	2021	-16.643	-8.4548	-26.2141
527	5	Prevalence	35456	Okayama	3	Both	27	Age-standardized	682	Caries of permanent teeth	3	Rate	1990	2021	-15.9449	-8.29873	-22.5439
528	5	Prevalence	44635	High SDI	3	Both	27	Age-standardized	682	Caries of permanent teeth	3	Rate	1990	2021	-7.27556	-3.49725	-10.5825
529	5	Prevalence	44646	Newcastle upon Tyne	3	Both	27	Age-standardized	682	Caries of permanent teeth	3	Rate	1990	2021	-2.78545	2.48444	-8.75642
530	5	Prevalence	35638	Machakos	3	Both	27	Age-standardized	682	Caries of permanent teeth	3	Rate	1990	2021	-1.65498	5.17652	-7.68898
531	5	Prevalence	35655	Taita Taveta	3	Both	27	Age-standardized	682	Caries of permanent teeth	3	Rate	1990	2021	-11.4413	-2.63281	-18.2602
532	5	Prevalence	44648	Redcar and Cleveland	3	Both	27	Age-standardized	682	Caries of permanent teeth	3	Rate	1990	2021	-2.52917	3.52595	-7.77074
533	5	Prevalence	35653	Samburu	3	Both	27	Age-standardized	682	Caries of permanent teeth	3	Rate	1990	2021	-9.22216	-1.2709	-16.6179
534	5	Prevalence	35467	艑ita	3	Both	27	Age-standardized	682	Caries of permanent teeth	3	Rate	1990	2021	-16.112	-8.5149	-24.8847
535	5	Prevalence	44564	Region of the Americas	3	Both	27	Age-standardized	682	Caries of permanent teeth	3	Rate	1990	2021	0.357093	2.73152	-1.79618
536	5	Prevalence	44537	Commonwealth Low Income	3	Both	27	Age-standardized	682	Caries of permanent teeth	3	Rate	1990	2021	-5.36551	-1.86332	-8.81465
537	5	Prevalence	44577	World Bank Lower Middle Income	3	Both	27	Age-standardized	682	Caries of permanent teeth	3	Rate	1990	2021	-5.44122	-3.99186	-6.82599
538	5	Prevalence	35438	Niigata	3	Both	27	Age-standardized	682	Caries of permanent teeth	3	Rate	1990	2021	-16.0239	-7.70854	-24.8178
539	5	Prevalence	35640	Mandera	3	Both	27	Age-standardized	682	Caries of permanent teeth	3	Rate	1990	2021	-28.8572	-14.46	-40.6522
540	5	Prevalence	35636	Laikipia	3	Both	27	Age-standardized	682	Caries of permanent teeth	3	Rate	1990	2021	-2.01642	4.01463	-8.1791
541	5	Prevalence	44587	African Union	3	Both	27	Age-standardized	682	Caries of permanent teeth	3	Rate	1990	2021	-5.82218	-4.21533	-7.32585
542	5	Prevalence	35651	Nyandarua	3	Both	27	Age-standardized	682	Caries of permanent teeth	3	Rate	1990	2021	-1.60068	5.37902	-7.13105
543	5	Prevalence	44655	Cheshire East	3	Both	27	Age-standardized	682	Caries of permanent teeth	3	Rate	1990	2021	-2.01406	4.88044	-8.64481
544	5	Prevalence	35425	Aomori	3	Both	27	Age-standardized	682	Caries of permanent teeth	3	Rate	1990	2021	-18.714	-11.2931	-26.1441
545	5	Prevalence	44562	Europe	3	Both	27	Age-standardized	682	Caries of permanent teeth	3	Rate	1990	2021	-6.69774	-4.09502	-9.27971
546	5	Prevalence	44560	America	3	Both	27	Age-standardized	682	Caries of permanent teeth	3	Rate	1990	2021	0.357093	2.73152	-1.79618
547	5	Prevalence	35625	Isiolo	3	Both	27	Age-standardized	682	Caries of permanent teeth	3	Rate	1990	2021	-0.135535	6.34703	-6.12151
548	5	Prevalence	44584	OECD Countries	3	Both	27	Age-standardized	682	Caries of permanent teeth	3	Rate	1990	2021	-7.68399	-5.16432	-10.2986
549	5	Prevalence	35649	Narok	3	Both	27	Age-standardized	682	Caries of permanent teeth	3	Rate	1990	2021	-0.9089	4.43663	-6.64887
550	5	Prevalence	44644	Northumberland	3	Both	27	Age-standardized	682	Caries of permanent teeth	3	Rate	1990	2021	-4.04003	2.34754	-11.2663
551	5	Prevalence	44651	Middlesbrough	3	Both	27	Age-standardized	682	Caries of permanent teeth	3	Rate	1990	2021	-2.50298	3.0962	-7.59938
552	5	Prevalence	44534	Commonwealth	3	Both	27	Age-standardized	682	Caries of permanent teeth	3	Rate	1990	2021	-6.16389	-4.33712	-7.68626
553	5	Prevalence	44657	Trafford	3	Both	27	Age-standardized	682	Caries of permanent teeth	3	Rate	1990	2021	-2.11264	4.57341	-7.55136
554	5	Prevalence	35620	Busia	3	Both	27	Age-standardized	682	Caries of permanent teeth	3	Rate	1990	2021	-1.15741	5.62568	-7.85374
555	5	Prevalence	44666	Warrington	3	Both	27	Age-standardized	682	Caries of permanent teeth	3	Rate	1990	2021	-23.3254	-2.76012	-38.6719
556	5	Prevalence	44634	High-middle SDI	3	Both	27	Age-standardized	682	Caries of permanent teeth	3	Rate	1990	2021	-5.62092	-2.5084	-8.85849
557	5	Prevalence	35662	Wajir	3	Both	27	Age-standardized	682	Caries of permanent teeth	3	Rate	1990	2021	-1.06431	6.76403	-7.38656
558	5	Prevalence	44668	Rochdale	3	Both	27	Age-standardized	682	Caries of permanent teeth	3	Rate	1990	2021	-15.4207	-2.17056	-27.1582
559	5	Prevalence	35647	Nakuru	3	Both	27	Age-standardized	682	Caries of permanent teeth	3	Rate	1990	2021	-41.4694	-23.8648	-54.8966
560	5	Prevalence	44642	Nordic Region	3	Both	27	Age-standardized	682	Caries of permanent teeth	3	Rate	1990	2021	3.75559	10.8234	-2.36201
561	5	Prevalence	44677	Manchester	3	Both	27	Age-standardized	682	Caries of permanent teeth	3	Rate	1990	2021	-3.56883	3.03684	-9.87934
562	5	Prevalence	44638	North America	3	Both	27	Age-standardized	682	Caries of permanent teeth	3	Rate	1990	2021	-5.1292	-1.3517	-8.536
563	5	Prevalence	35645	Murang'a	3	Both	27	Age-standardized	682	Caries of permanent teeth	3	Rate	1990	2021	-28.9252	-17.5005	-40.1412
564	5	Prevalence	44653	Sunderland	3	Both	27	Age-standardized	682	Caries of permanent teeth	3	Rate	1990	2021	-4.2107	1.62949	-10.4457
565	5	Prevalence	44679	East Riding of Yorkshire	3	Both	27	Age-standardized	682	Caries of permanent teeth	3	Rate	1990	2021	-23.325	-3.36077	-38.3154
566	5	Prevalence	35660	Uasin Gishu	3	Both	27	Age-standardized	682	Caries of permanent teeth	3	Rate	1990	2021	-0.462548	6.75344	-6.71368
567	5	Prevalence	44559	Africa	3	Both	27	Age-standardized	682	Caries of permanent teeth	3	Rate	1990	2021	-5.82218	-4.21533	-7.32585
568	5	Prevalence	44575	World Bank High Income	3	Both	27	Age-standardized	682	Caries of permanent teeth	3	Rate	1990	2021	-7.90425	-5.22167	-10.545
569	5	Prevalence	44567	Eastern Mediterranean Region	3	Both	27	Age-standardized	682	Caries of permanent teeth	3	Rate	1990	2021	-2.8788	-1.11631	-4.91488
570	5	Prevalence	35658	Trans Nzoia	3	Both	27	Age-standardized	682	Caries of permanent teeth	3	Rate	1990	2021	-0.764881	5.18931	-7.30413
571	5	Prevalence	35469	Kagoshima	3	Both	27	Age-standardized	682	Caries of permanent teeth	3	Rate	1990	2021	-16.1412	-7.1553	-24.8677
572	5	Prevalence	44536	Commonwealth Middle Income	3	Both	27	Age-standardized	682	Caries of permanent teeth	3	Rate	1990	2021	-6.27998	-4.42045	-7.99251
573	5	Prevalence	44636	Low-middle SDI	3	Both	27	Age-standardized	682	Caries of permanent teeth	3	Rate	1990	2021	-5.59227	-3.91663	-7.30069
574	5	Prevalence	35458	Yamaguchi	3	Both	27	Age-standardized	682	Caries of permanent teeth	3	Rate	1990	2021	-39.282	-20.1863	-54.2964
575	5	Prevalence	44662	Bolton	3	Both	27	Age-standardized	682	Caries of permanent teeth	3	Rate	1990	2021	-3.53738	2.00526	-9.69253
576	5	Prevalence	44647	North Tyneside	3	Both	27	Age-standardized	682	Caries of permanent teeth	3	Rate	1990	2021	-2.1514	4.18634	-7.28259
577	5	Prevalence	44675	Knowsley	3	Both	27	Age-standardized	682	Caries of permanent teeth	3	Rate	1990	2021	-4.78115	1.21179	-10.0214
578	5	Prevalence	35656	Tana River	3	Both	27	Age-standardized	682	Caries of permanent teeth	3	Rate	1990	2021	-0.574098	7.03973	-6.38108
579	5	Prevalence	44538	Other Union Territories	3	Both	27	Age-standardized	682	Caries of permanent teeth	3	Rate	1990	2021	-6.7081	-1.2365	-12.1699
580	5	Prevalence	44565	South-East Asia Region	3	Both	27	Age-standardized	682	Caries of permanent teeth	3	Rate	1990	2021	-5.55475	-3.72102	-7.18457
581	5	Prevalence	44673	Salford	3	Both	27	Age-standardized	682	Caries of permanent teeth	3	Rate	1990	2021	-3.46916	3.13556	-9.25594
582	5	Prevalence	44671	Liverpool	3	Both	27	Age-standardized	682	Caries of permanent teeth	3	Rate	1990	2021	-11.5576	1.49735	-23.9375
583	5	Prevalence	44701	Leicester	3	Both	27	Age-standardized	682	Caries of permanent teeth	3	Rate	1990	2021	-2.60387	3.13147	-7.39697
584	5	Prevalence	44664	Bury	3	Both	27	Age-standardized	682	Caries of permanent teeth	3	Rate	1990	2021	-14.9792	-3.89919	-25.5858
585	5	Prevalence	44578	World Bank Low Income	3	Both	27	Age-standardized	682	Caries of permanent teeth	3	Rate	1990	2021	-2.67032	-0.911365	-4.45934
586	5	Prevalence	44699	Nottinghamshire	3	Both	27	Age-standardized	682	Caries of permanent teeth	3	Rate	1990	2021	-27.7677	-7.88633	-42.6724
587	5	Prevalence	44649	County Durham	3	Both	27	Age-standardized	682	Caries of permanent teeth	3	Rate	1990	2021	-1.70036	5.65799	-7.6861
588	5	Prevalence	44590	Four World Regions	3	Both	27	Age-standardized	682	Caries of permanent teeth	3	Rate	1990	2021	-2.76382	-0.622183	-4.66439
589	5	Prevalence	44690	Doncaster	3	Both	27	Age-standardized	682	Caries of permanent teeth	3	Rate	1990	2021	-2.93828	1.83727	-7.89483
590	5	Prevalence	44682	Calderdale	3	Both	27	Age-standardized	682	Caries of permanent teeth	3	Rate	1990	2021	-2.18126	3.99661	-7.55827
591	5	Prevalence	44656	Stockport	3	Both	27	Age-standardized	682	Caries of permanent teeth	3	Rate	1990	2021	-14.5068	-1.81472	-25.3623
592	5	Prevalence	44561	Asia	3	Both	27	Age-standardized	682	Caries of permanent teeth	3	Rate	1990	2021	0.237118	3.35422	-2.63963
593	5	Prevalence	44586	G20	3	Both	27	Age-standardized	682	Caries of permanent teeth	3	Rate	1990	2021	-3.52402	-0.619477	-6.23574
594	5	Prevalence	44710	Telford and Wrekin	3	Both	27	Age-standardized	682	Caries of permanent teeth	3	Rate	1990	2021	-5.27257	1.38562	-11.551
595	5	Prevalence	44712	Walsall	3	Both	27	Age-standardized	682	Caries of permanent teeth	3	Rate	1990	2021	-13.1892	0.784894	-25.4354
596	5	Prevalence	44645	Stockton-on-Tees	3	Both	27	Age-standardized	682	Caries of permanent teeth	3	Rate	1990	2021	-2.00885	4.07794	-7.45227
597	5	Prevalence	44563	African Region	3	Both	27	Age-standardized	682	Caries of permanent teeth	3	Rate	1990	2021	-4.8644	-3.17666	-6.43152
598	5	Prevalence	44697	Derby	3	Both	27	Age-standardized	682	Caries of permanent teeth	3	Rate	1990	2021	-26.1494	-5.49511	-41.7806
599	5	Prevalence	44686	Leeds	3	Both	27	Age-standardized	682	Caries of permanent teeth	3	Rate	1990	2021	-3.19237	2.4001	-8.42835
600	5	Prevalence	44688	Wakefield	3	Both	27	Age-standardized	682	Caries of permanent teeth	3	Rate	1990	2021	-16.1054	6.15407	-33.1142
601	5	Prevalence	44667	Oldham	3	Both	27	Age-standardized	682	Caries of permanent teeth	3	Rate	1990	2021	-0.58248	6.37925	-6.53113
602	5	Prevalence	44652	South Tyneside	3	Both	27	Age-standardized	682	Caries of permanent teeth	3	Rate	1990	2021	-2.19825	3.14322	-8.07964
603	5	Prevalence	44684	Bradford	3	Both	27	Age-standardized	682	Caries of permanent teeth	3	Rate	1990	2021	-24.2747	-5.02723	-39.8797
604	5	Prevalence	44658	Cheshire West and Chester	3	Both	27	Age-standardized	682	Caries of permanent teeth	3	Rate	1990	2021	-3.02514	4.14568	-8.72178
605	5	Prevalence	44678	North Yorkshire	3	Both	27	Age-standardized	682	Caries of permanent teeth	3	Rate	1990	2021	-2.54611	3.98309	-8.00906
606	5	Prevalence	44660	Lancashire	3	Both	27	Age-standardized	682	Caries of permanent teeth	3	Rate	1990	2021	-2.8334	3.07207	-8.1941
607	5	Prevalence	44639	Middle SDI	3	Both	27	Age-standardized	682	Caries of permanent teeth	3	Rate	1990	2021	-0.287962	2.96652	-3.1603
608	5	Prevalence	44669	Wigan	3	Both	27	Age-standardized	682	Caries of permanent teeth	3	Rate	1990	2021	-24.4045	-6.09182	-39.6598
609	5	Prevalence	44643	Darlington	3	Both	27	Age-standardized	682	Caries of permanent teeth	3	Rate	1990	2021	-1.89933	3.59824	-7.13947
610	5	Prevalence	44719	Hertfordshire	3	Both	27	Age-standardized	682	Caries of permanent teeth	3	Rate	1990	2021	-2.50492	4.63262	-8.57973
611	5	Prevalence	44721	Cambridgeshire	3	Both	27	Age-standardized	682	Caries of permanent teeth	3	Rate	1990	2021	-2.67099	4.40289	-8.95471
612	5	Prevalence	44654	Hartlepool	3	Both	27	Age-standardized	682	Caries of permanent teeth	3	Rate	1990	2021	-3.17241	2.37727	-8.79001
613	5	Prevalence	44576	World Bank Upper Middle Income	3	Both	27	Age-standardized	682	Caries of permanent teeth	3	Rate	1990	2021	-1.22166	2.75893	-5.31443
614	5	Prevalence	44680	York	3	Both	27	Age-standardized	682	Caries of permanent teeth	3	Rate	1990	2021	-3.26097	3.46172	-9.91594
615	5	Prevalence	44732	Bexley	3	Both	27	Age-standardized	682	Caries of permanent teeth	3	Rate	1990	2021	-27.4929	-7.0718	-43.6917
616	5	Prevalence	44637	Low SDI	3	Both	27	Age-standardized	682	Caries of permanent teeth	3	Rate	1990	2021	-4.14996	-2.70036	-5.7052
617	5	Prevalence	44726	Luton	3	Both	27	Age-standardized	682	Caries of permanent teeth	3	Rate	1990	2021	-2.69022	3.99238	-10.0397
618	5	Prevalence	44702	Warwickshire	3	Both	27	Age-standardized	682	Caries of permanent teeth	3	Rate	1990	2021	-1.88955	4.41927	-7.70393
619	5	Prevalence	44728	Kensington and Chelsea	3	Both	27	Age-standardized	682	Caries of permanent teeth	3	Rate	1990	2021	-4.96911	1.80042	-11.0443
620	5	Prevalence	44717	Central Bedfordshire	3	Both	27	Age-standardized	682	Caries of permanent teeth	3	Rate	1990	2021	-3.47321	5.12557	-10.0967
621	5	Prevalence	44663	Wirral	3	Both	27	Age-standardized	682	Caries of permanent teeth	3	Rate	1990	2021	-2.65893	3.11603	-8.22425
622	5	Prevalence	44674	Blackburn with Darwen	3	Both	27	Age-standardized	682	Caries of permanent teeth	3	Rate	1990	2021	-2.12362	3.5625	-7.481
623	5	Prevalence	44676	Blackpool	3	Both	27	Age-standardized	682	Caries of permanent teeth	3	Rate	1990	2021	-2.97732	3.19173	-8.81278
624	5	Prevalence	44672	Tameside	3	Both	27	Age-standardized	682	Caries of permanent teeth	3	Rate	1990	2021	-1.6517	4.42504	-7.98944
625	5	Prevalence	44665	St Helens	3	Both	27	Age-standardized	682	Caries of permanent teeth	3	Rate	1990	2021	-15.7014	-3.01869	-26.1579
626	5	Prevalence	44737	Havering	3	Both	27	Age-standardized	682	Caries of permanent teeth	3	Rate	1990	2021	-3.27773	2.46435	-9.31632
627	5	Prevalence	44700	Nottingham	3	Both	27	Age-standardized	682	Caries of permanent teeth	3	Rate	1990	2021	-2.64859	2.95202	-8.66501
628	5	Prevalence	44650	Gateshead	3	Both	27	Age-standardized	682	Caries of permanent teeth	3	Rate	1990	2021	-2.72631	3.2096	-8.42797
629	5	Prevalence	44695	Lincolnshire	3	Both	27	Age-standardized	682	Caries of permanent teeth	3	Rate	1990	2021	-3.03767	4.20974	-8.91321
630	5	Prevalence	44743	Hammersmith and Fulham	3	Both	27	Age-standardized	682	Caries of permanent teeth	3	Rate	1990	2021	-24.6713	-2.20519	-41.0749
631	5	Prevalence	44730	Westminster	3	Both	27	Age-standardized	682	Caries of permanent teeth	3	Rate	1990	2021	-4.41028	2.56857	-11.4043
632	5	Prevalence	44741	Enfield	3	Both	27	Age-standardized	682	Caries of permanent teeth	3	Rate	1990	2021	-3.13532	3.67714	-9.31876
633	5	Prevalence	44752	Southwark	3	Both	27	Age-standardized	682	Caries of permanent teeth	3	Rate	1990	2021	-23.7536	0.916217	-41.2988
634	5	Prevalence	44659	Sefton	3	Both	27	Age-standardized	682	Caries of permanent teeth	3	Rate	1990	2021	-3.58025	2.11227	-8.91995
635	5	Prevalence	44683	North Lincolnshire	3	Both	27	Age-standardized	682	Caries of permanent teeth	3	Rate	1990	2021	-22.0136	-0.722471	-38.5228
636	5	Prevalence	44735	Brent	3	Both	27	Age-standardized	682	Caries of permanent teeth	3	Rate	1990	2021	-1.89825	4.4425	-8.58888
637	5	Prevalence	44711	Stoke-on-Trent	3	Both	27	Age-standardized	682	Caries of permanent teeth	3	Rate	1990	2021	-2.20693	3.14957	-7.24396
638	5	Prevalence	44687	Sheffield	3	Both	27	Age-standardized	682	Caries of permanent teeth	3	Rate	1990	2021	-2.84668	2.29092	-8.22623
639	5	Prevalence	44713	Wolverhampton	3	Both	27	Age-standardized	682	Caries of permanent teeth	3	Rate	1990	2021	-2.95888	3.79977	-9.10434
640	5	Prevalence	44739	Sutton	3	Both	27	Age-standardized	682	Caries of permanent teeth	3	Rate	1990	2021	-3.51781	3.62993	-10.508
641	5	Prevalence	44724	Southend-on-Sea	3	Both	27	Age-standardized	682	Caries of permanent teeth	3	Rate	1990	2021	-16.0567	-2.06816	-29.6983
642	5	Prevalence	44704	Solihull	3	Both	27	Age-standardized	682	Caries of permanent teeth	3	Rate	1990	2021	-2.50421	4.11916	-8.84948
643	5	Prevalence	44708	Dudley	3	Both	27	Age-standardized	682	Caries of permanent teeth	3	Rate	1990	2021	-2.23622	5.16175	-8.53384
644	5	Prevalence	44693	Northamptonshire	3	Both	27	Age-standardized	682	Caries of permanent teeth	3	Rate	1990	2021	-2.09279	4.17429	-8.25139
645	5	Prevalence	44706	Worcestershire	3	Both	27	Age-standardized	682	Caries of permanent teeth	3	Rate	1990	2021	-14.3255	-2.2478	-25.9583
646	5	Prevalence	44661	Cumbria	3	Both	27	Age-standardized	682	Caries of permanent teeth	3	Rate	1990	2021	-25.2721	-6.38904	-39.651
647	5	Prevalence	44670	Halton	3	Both	27	Age-standardized	682	Caries of permanent teeth	3	Rate	1990	2021	-15.0066	-2.68249	-25.8641
648	5	Prevalence	44754	Barking and Dagenham	3	Both	27	Age-standardized	682	Caries of permanent teeth	3	Rate	1990	2021	-3.12855	4.13046	-9.19059
649	5	Prevalence	44722	Thurrock	3	Both	27	Age-standardized	682	Caries of permanent teeth	3	Rate	1990	2021	-17.779	-5.84707	-30.3523
650	5	Prevalence	44698	Derbyshire	3	Both	27	Age-standardized	682	Caries of permanent teeth	3	Rate	1990	2021	-4.05029	4.68275	-11.4858
651	5	Prevalence	44720	Essex	3	Both	27	Age-standardized	682	Caries of permanent teeth	3	Rate	1990	2021	-3.55251	3.59568	-11.1517
652	5	Prevalence	44750	Lewisham	3	Both	27	Age-standardized	682	Caries of permanent teeth	3	Rate	1990	2021	-3.63676	2.52001	-9.82363
653	5	Prevalence	44715	Sandwell	3	Both	27	Age-standardized	682	Caries of permanent teeth	3	Rate	1990	2021	-2.35445	3.84047	-7.3823
654	5	Prevalence	44681	North East Lincolnshire	3	Both	27	Age-standardized	682	Caries of permanent teeth	3	Rate	1990	2021	-2.24421	6.1851	-8.02678
655	5	Prevalence	44733	Redbridge	3	Both	27	Age-standardized	682	Caries of permanent teeth	3	Rate	1990	2021	-1.4784	4.82031	-7.57546
656	5	Prevalence	44729	Barnet	3	Both	27	Age-standardized	682	Caries of permanent teeth	3	Rate	1990	2021	-1.93051	4.08359	-8.09687
657	5	Prevalence	44746	Wandsworth	3	Both	27	Age-standardized	682	Caries of permanent teeth	3	Rate	1990	2021	-3.30276	3.09327	-8.64598
658	5	Prevalence	44748	Camden	3	Both	27	Age-standardized	682	Caries of permanent teeth	3	Rate	1990	2021	-4.02288	2.62828	-10.2055
659	5	Prevalence	44727	Richmond upon Thames	3	Both	27	Age-standardized	682	Caries of permanent teeth	3	Rate	1990	2021	-2.86496	5.36406	-11.208
660	5	Prevalence	44763	West Berkshire	3	Both	27	Age-standardized	682	Caries of permanent teeth	3	Rate	1990	2021	-17.3701	-4.77357	-28.5083
661	5	Prevalence	44703	Herefordshire, County of	3	Both	27	Age-standardized	682	Caries of permanent teeth	3	Rate	1990	2021	-1.95542	3.66783	-7.36181
662	5	Prevalence	44785	Gloucestershire	3	Both	27	Age-standardized	682	Caries of permanent teeth	3	Rate	1990	2021	-2.4074	5.29769	-9.47474
663	5	Prevalence	44718	Suffolk	3	Both	27	Age-standardized	682	Caries of permanent teeth	3	Rate	1990	2021	-27.5886	-8.4104	-42.3352
664	5	Prevalence	44757	Islington	3	Both	27	Age-standardized	682	Caries of permanent teeth	3	Rate	1990	2021	-22.3254	-1.41247	-38.2735
665	5	Prevalence	44774	Isle of Wight	3	Both	27	Age-standardized	682	Caries of permanent teeth	3	Rate	1990	2021	-3.88928	2.6561	-10.2194
666	5	Prevalence	44738	Kingston upon Thames	3	Both	27	Age-standardized	682	Caries of permanent teeth	3	Rate	1990	2021	-2.47228	4.31331	-8.24187
667	5	Prevalence	44853	Afar	3	Both	27	Age-standardized	682	Caries of permanent teeth	3	Rate	1990	2021	-8.15019	-0.529191	-14.0991
668	5	Prevalence	44753	Newham	3	Both	27	Age-standardized	682	Caries of permanent teeth	3	Rate	1990	2021	-2.77596	4.62742	-9.52274
669	5	Prevalence	44742	Croydon	3	Both	27	Age-standardized	682	Caries of permanent teeth	3	Rate	1990	2021	-2.73142	4.14221	-8.90304
670	5	Prevalence	44731	Bromley	3	Both	27	Age-standardized	682	Caries of permanent teeth	3	Rate	1990	2021	-2.46115	3.59499	-7.31211
671	5	Prevalence	44714	Birmingham	3	Both	27	Age-standardized	682	Caries of permanent teeth	3	Rate	1990	2021	-21.7406	-0.0959351	-38.5999
672	5	Prevalence	44744	Ealing	3	Both	27	Age-standardized	682	Caries of permanent teeth	3	Rate	1990	2021	-2.46238	3.20489	-7.78848
673	5	Prevalence	44776	Southampton	3	Both	27	Age-standardized	682	Caries of permanent teeth	3	Rate	1990	2021	-17.7682	-5.05707	-28.9051
674	5	Prevalence	44736	Hillingdon	3	Both	27	Age-standardized	682	Caries of permanent teeth	3	Rate	1990	2021	-3.3728	4.67409	-9.37025
675	5	Prevalence	44761	Surrey	3	Both	27	Age-standardized	682	Caries of permanent teeth	3	Rate	1990	2021	-2.80441	3.4198	-8.25704
676	5	Prevalence	44759	Wokingham	3	Both	27	Age-standardized	682	Caries of permanent teeth	3	Rate	1990	2021	-2.97291	4.32387	-9.2579
677	5	Prevalence	44772	East Sussex	3	Both	27	Age-standardized	682	Caries of permanent teeth	3	Rate	1990	2021	-3.14373	2.89115	-8.91438
678	5	Prevalence	44779	Dorset	3	Both	27	Age-standardized	682	Caries of permanent teeth	3	Rate	1990	2021	-2.89448	5.14017	-9.29076
679	5	Prevalence	44740	Harrow	3	Both	27	Age-standardized	682	Caries of permanent teeth	3	Rate	1990	2021	-27.062	-6.3096	-41.673
680	5	Prevalence	44696	Rutland	3	Both	27	Age-standardized	682	Caries of permanent teeth	3	Rate	1990	2021	-3.55814	4.26671	-9.74747
681	5	Prevalence	44725	Peterborough	3	Both	27	Age-standardized	682	Caries of permanent teeth	3	Rate	1990	2021	-17.6167	-4.95955	-28.7101
682	5	Prevalence	44723	Norfolk	3	Both	27	Age-standardized	682	Caries of permanent teeth	3	Rate	1990	2021	-3.43889	4.21043	-11.0307
683	5	Prevalence	44865	Ardebil	3	Both	27	Age-standardized	682	Caries of permanent teeth	3	Rate	1990	2021	-1.48588	5.01684	-7.48007
684	5	Prevalence	44862	Dire Dawa	3	Both	27	Age-standardized	682	Caries of permanent teeth	3	Rate	1990	2021	-3.10214	3.97576	-10.3669
685	5	Prevalence	44751	Hounslow	3	Both	27	Age-standardized	682	Caries of permanent teeth	3	Rate	1990	2021	-3.05273	4.44617	-9.51351
686	5	Prevalence	44734	Merton	3	Both	27	Age-standardized	682	Caries of permanent teeth	3	Rate	1990	2021	-16.2288	-1.54462	-28.6639
687	5	Prevalence	44790	Bournemouth	3	Both	27	Age-standardized	682	Caries of permanent teeth	3	Rate	1990	2021	-2.67372	3.83263	-8.99482
688	5	Prevalence	44852	Tigray	3	Both	27	Age-standardized	682	Caries of permanent teeth	3	Rate	1990	2021	-7.60147	-0.525792	-14.9466
689	5	Prevalence	44856	Somali	3	Both	27	Age-standardized	682	Caries of permanent teeth	3	Rate	1990	2021	-7.48258	-0.643226	-13.3207
690	5	Prevalence	44755	Haringey	3	Both	27	Age-standardized	682	Caries of permanent teeth	3	Rate	1990	2021	-2.5096	4.15949	-7.8461
691	5	Prevalence	44858	Southern Nations, Nationalities, and Peoples	3	Both	27	Age-standardized	682	Caries of permanent teeth	3	Rate	1990	2021	-6.96753	0.766091	-12.8346
692	5	Prevalence	44749	Lambeth	3	Both	27	Age-standardized	682	Caries of permanent teeth	3	Rate	1990	2021	-15.8766	-3.14135	-27.943
693	5	Prevalence	44792	Plymouth	3	Both	27	Age-standardized	682	Caries of permanent teeth	3	Rate	1990	2021	-3.17534	3.43022	-8.88574
694	5	Prevalence	44765	Bracknell Forest	3	Both	27	Age-standardized	682	Caries of permanent teeth	3	Rate	1990	2021	-2.38211	4.22957	-8.19445
695	5	Prevalence	44709	Coventry	3	Both	27	Age-standardized	682	Caries of permanent teeth	3	Rate	1990	2021	-2.07203	4.00226	-7.6192
696	5	Prevalence	44747	Waltham Forest	3	Both	27	Age-standardized	682	Caries of permanent teeth	3	Rate	1990	2021	-3.2327	2.65888	-8.80102
697	5	Prevalence	44868	Bushehr	3	Both	27	Age-standardized	682	Caries of permanent teeth	3	Rate	1990	2021	-15.2007	-1.64401	-25.8517
698	5	Prevalence	44775	Milton Keynes	3	Both	27	Age-standardized	682	Caries of permanent teeth	3	Rate	1990	2021	-2.5419	4.00334	-9.55143
699	5	Prevalence	44691	Kingston upon Hull, City of	3	Both	27	Age-standardized	682	Caries of permanent teeth	3	Rate	1990	2021	-2.00474	3.89055	-7.38074
700	5	Prevalence	44689	Rotherham	3	Both	27	Age-standardized	682	Caries of permanent teeth	3	Rate	1990	2021	-2.96197	3.15121	-8.3617
701	5	Prevalence	44764	Hampshire	3	Both	27	Age-standardized	682	Caries of permanent teeth	3	Rate	1990	2021	-16.3784	-2.99339	-28.4749
702	5	Prevalence	44707	Staffordshire	3	Both	27	Age-standardized	682	Caries of permanent teeth	3	Rate	1990	2021	-3.37997	3.32879	-9.24382
703	5	Prevalence	44758	Tower Hamlets	3	Both	27	Age-standardized	682	Caries of permanent teeth	3	Rate	1990	2021	-4.61305	1.36815	-11.3123
704	5	Prevalence	44788	Torbay	3	Both	27	Age-standardized	682	Caries of permanent teeth	3	Rate	1990	2021	-2.9991	3.86177	-8.90075
705	5	Prevalence	44783	Poole	3	Both	27	Age-standardized	682	Caries of permanent teeth	3	Rate	1990	2021	-1.56062	5.17056	-7.68116
706	5	Prevalence	44854	Amhara	3	Both	27	Age-standardized	682	Caries of permanent teeth	3	Rate	1990	2021	-4.6093	1.14717	-10.753
707	5	Prevalence	44860	Gambella	3	Both	27	Age-standardized	682	Caries of permanent teeth	3	Rate	1990	2021	-7.58965	-0.655313	-14.0199
708	5	Prevalence	44768	Reading	3	Both	27	Age-standardized	682	Caries of permanent teeth	3	Rate	1990	2021	-16.2247	-3.26612	-27.7235
709	5	Prevalence	44786	Somerset	3	Both	27	Age-standardized	682	Caries of permanent teeth	3	Rate	1990	2021	-3.01409	3.86117	-10.7662
710	5	Prevalence	44885	Lorestan	3	Both	27	Age-standardized	682	Caries of permanent teeth	3	Rate	1990	2021	-2.71852	4.23062	-8.83726
711	5	Prevalence	44780	Wiltshire	3	Both	27	Age-standardized	682	Caries of permanent teeth	3	Rate	1990	2021	-3.04149	4.73806	-10.0879
712	5	Prevalence	44773	Portsmouth	3	Both	27	Age-standardized	682	Caries of permanent teeth	3	Rate	1990	2021	-2.46749	4.61394	-8.70979
713	5	Prevalence	44760	Buckinghamshire	3	Both	27	Age-standardized	682	Caries of permanent teeth	3	Rate	1990	2021	-3.75087	2.75084	-10.0997
714	5	Prevalence	44745	Greenwich	3	Both	27	Age-standardized	682	Caries of permanent teeth	3	Rate	1990	2021	-26.2004	-5.66333	-43.849
715	5	Prevalence	44872	Golestan	3	Both	27	Age-standardized	682	Caries of permanent teeth	3	Rate	1990	2021	-3.0117	3.93996	-8.39956
716	5	Prevalence	44777	Slough	3	Both	27	Age-standardized	682	Caries of permanent teeth	3	Rate	1990	2021	-2.9278	4.21854	-9.72877
717	5	Prevalence	44762	Windsor and Maidenhead	3	Both	27	Age-standardized	682	Caries of permanent teeth	3	Rate	1990	2021	-16.8227	-4.6198	-27.6643
718	5	Prevalence	44887	Mazandaran	3	Both	27	Age-standardized	682	Caries of permanent teeth	3	Rate	1990	2021	-0.158386	6.86462	-5.46944
719	5	Prevalence	44870	Fars	3	Both	27	Age-standardized	682	Caries of permanent teeth	3	Rate	1990	2021	-4.88085	1.06518	-10.408
720	5	Prevalence	44894	Zanjan	3	Both	27	Age-standardized	682	Caries of permanent teeth	3	Rate	1990	2021	0.944922	6.88826	-4.82311
721	5	Prevalence	44892	Tehran	3	Both	27	Age-standardized	682	Caries of permanent teeth	3	Rate	1990	2021	-1.02329	4.52889	-7.48781
722	5	Prevalence	44866	East Azarbayejan	3	Both	27	Age-standardized	682	Caries of permanent teeth	3	Rate	1990	2021	-3.12721	2.01946	-9.07733
723	5	Prevalence	44864	Alborz	3	Both	27	Age-standardized	682	Caries of permanent teeth	3	Rate	1990	2021	-3.56144	3.23806	-9.20467
724	5	Prevalence	44791	Cornwall	3	Both	27	Age-standardized	682	Caries of permanent teeth	3	Rate	1990	2021	-3.39996	4.23166	-10.2023
725	5	Prevalence	44883	Kohgiluyeh and Boyer-Ahmad	3	Both	27	Age-standardized	682	Caries of permanent teeth	3	Rate	1990	2021	-2.83459	3.51515	-8.34226
726	5	Prevalence	44756	Hackney	3	Both	27	Age-standardized	682	Caries of permanent teeth	3	Rate	1990	2021	-2.92501	4.87744	-9.35285
727	5	Prevalence	44874	Hormozgan	3	Both	27	Age-standardized	682	Caries of permanent teeth	3	Rate	1990	2021	-4.74809	1.30227	-10.3258
728	5	Prevalence	44876	Isfahan	3	Both	27	Age-standardized	682	Caries of permanent teeth	3	Rate	1990	2021	-4.34812	2.66542	-10.1071
729	5	Prevalence	44685	Kirklees	3	Both	27	Age-standardized	682	Caries of permanent teeth	3	Rate	1990	2021	-2.16386	3.49499	-7.34632
730	5	Prevalence	44857	Benishangul-Gumuz	3	Both	27	Age-standardized	682	Caries of permanent teeth	3	Rate	1990	2021	-7.53577	-0.561738	-14.0318
731	5	Prevalence	44859	Harari	3	Both	27	Age-standardized	682	Caries of permanent teeth	3	Rate	1990	2021	-3.08407	3.08964	-9.16932
732	5	Prevalence	44890	Semnan	3	Both	27	Age-standardized	682	Caries of permanent teeth	3	Rate	1990	2021	-2.08148	4.03684	-7.28411
733	5	Prevalence	44694	Leicestershire	3	Both	27	Age-standardized	682	Caries of permanent teeth	3	Rate	1990	2021	-2.83801	2.63094	-8.69831
734	5	Prevalence	44705	Shropshire	3	Both	27	Age-standardized	682	Caries of permanent teeth	3	Rate	1990	2021	-3.07678	3.1168	-9.84723
735	5	Prevalence	44770	Brighton and Hove	3	Both	27	Age-standardized	682	Caries of permanent teeth	3	Rate	1990	2021	-14.6523	-0.463696	-27.6292
736	5	Prevalence	44879	North Khorasan	3	Both	27	Age-standardized	682	Caries of permanent teeth	3	Rate	1990	2021	-3.669	1.74264	-8.8076
737	5	Prevalence	44781	North Somerset	3	Both	27	Age-standardized	682	Caries of permanent teeth	3	Rate	1990	2021	-2.89439	3.72415	-8.97321
738	5	Prevalence	44881	South Khorasan	3	Both	27	Age-standardized	682	Caries of permanent teeth	3	Rate	1990	2021	-3.53196	2.78719	-8.40478
739	5	Prevalence	44869	Chahar Mahaal and Bakhtiari	3	Both	27	Age-standardized	682	Caries of permanent teeth	3	Rate	1990	2021	-3.94413	2.32447	-9.55604
740	5	Prevalence	44769	Kent	3	Both	27	Age-standardized	682	Caries of permanent teeth	3	Rate	1990	2021	-3.60553	2.84466	-10.5786
741	5	Prevalence	44861	Addis Ababa	3	Both	27	Age-standardized	682	Caries of permanent teeth	3	Rate	1990	2021	-2.87928	3.88011	-10.2014
742	5	Prevalence	44789	Bristol, City of	3	Both	27	Age-standardized	682	Caries of permanent teeth	3	Rate	1990	2021	-2.84842	4.19697	-10.4526
743	5	Prevalence	44787	Swindon	3	Both	27	Age-standardized	682	Caries of permanent teeth	3	Rate	1990	2021	-2.61694	4.19579	-8.4385
744	5	Prevalence	44886	Markazi	3	Both	27	Age-standardized	682	Caries of permanent teeth	3	Rate	1990	2021	-2.40274	5.40536	-8.17374
745	5	Prevalence	44855	Oromia	3	Both	27	Age-standardized	682	Caries of permanent teeth	3	Rate	1990	2021	-8.03638	-1.66102	-14.365
746	5	Prevalence	44873	Hamadan	3	Both	27	Age-standardized	682	Caries of permanent teeth	3	Rate	1990	2021	-2.36965	3.57678	-8.6095
747	5	Prevalence	53617	Gilgit-Baltistan	3	Both	27	Age-standardized	682	Caries of permanent teeth	3	Rate	1990	2021	1.45047	8.9086	-5.64373
748	5	Prevalence	44778	South Gloucestershire	3	Both	27	Age-standardized	682	Caries of permanent teeth	3	Rate	1990	2021	-2.72641	5.1899	-9.32454
749	5	Prevalence	44888	Qazvin	3	Both	27	Age-standardized	682	Caries of permanent teeth	3	Rate	1990	2021	-3.11957	2.57363	-7.70201
750	5	Prevalence	44871	Gilan	3	Both	27	Age-standardized	682	Caries of permanent teeth	3	Rate	1990	2021	-2.4593	5.18629	-8.91371
751	5	Prevalence	53619	Khyber Pakhtunkhwa	3	Both	27	Age-standardized	682	Caries of permanent teeth	3	Rate	1990	2021	0.583697	7.51945	-5.77032
752	5	Prevalence	44867	West Azarbayejan	3	Both	27	Age-standardized	682	Caries of permanent teeth	3	Rate	1990	2021	-3.86564	1.87768	-9.54208
753	5	Prevalence	44716	Bedford	3	Both	27	Age-standardized	682	Caries of permanent teeth	3	Rate	1990	2021	-2.77819	3.54663	-10.5431
754	5	Prevalence	44884	Kurdistan	3	Both	27	Age-standardized	682	Caries of permanent teeth	3	Rate	1990	2021	-1.74436	3.76159	-6.523
755	5	Prevalence	44766	West Sussex	3	Both	27	Age-standardized	682	Caries of permanent teeth	3	Rate	1990	2021	-2.30221	5.01685	-9.31798
756	5	Prevalence	44893	Yazd	3	Both	27	Age-standardized	682	Caries of permanent teeth	3	Rate	1990	2021	-5.26043	1.46311	-11.1544
757	5	Prevalence	44877	Kerman	3	Both	27	Age-standardized	682	Caries of permanent teeth	3	Rate	1990	2021	-1.09291	4.88509	-6.06616
758	5	Prevalence	44875	Ilam	3	Both	27	Age-standardized	682	Caries of permanent teeth	3	Rate	1990	2021	-1.8893	4.22342	-8.10781
759	5	Prevalence	53432	Tr酶ndelag	3	Both	27	Age-standardized	682	Caries of permanent teeth	3	Rate	1990	2021	-2.9028	3.98451	-9.45757
760	5	Prevalence	53615	Azad Jammu & Kashmir	3	Both	27	Age-standardized	682	Caries of permanent teeth	3	Rate	1990	2021	-3.08131	4.44159	-9.79977
761	5	Prevalence	44891	Sistan and Baluchistan	3	Both	27	Age-standardized	682	Caries of permanent teeth	3	Rate	1990	2021	-0.975986	5.34026	-7.20981
762	5	Prevalence	44882	Khuzestan	3	Both	27	Age-standardized	682	Caries of permanent teeth	3	Rate	1990	2021	-0.995172	4.93868	-7.19215
763	5	Prevalence	60135	Innlandet	3	Both	27	Age-standardized	682	Caries of permanent teeth	3	Rate	1990	2021	-2.80012	3.60703	-9.106
764	5	Prevalence	44784	Bath and North East Somerset	3	Both	27	Age-standardized	682	Caries of permanent teeth	3	Rate	1990	2021	-3.20171	5.54695	-9.55631
765	5	Prevalence	44880	Khorasan-e-Razavi	3	Both	27	Age-standardized	682	Caries of permanent teeth	3	Rate	1990	2021	-3.0684	1.97729	-8.6677
766	5	Prevalence	44771	Medway	3	Both	27	Age-standardized	682	Caries of permanent teeth	3	Rate	1990	2021	-3.01328	3.8976	-9.81977
767	5	Prevalence	44782	Devon	3	Both	27	Age-standardized	682	Caries of permanent teeth	3	Rate	1990	2021	-2.16278	4.36243	-7.56597
768	5	Prevalence	44692	Barnsley	3	Both	27	Age-standardized	682	Caries of permanent teeth	3	Rate	1990	2021	-2.38074	3.95778	-8.27268
769	5	Prevalence	94366	Sahel Region	3	Both	27	Age-standardized	682	Caries of permanent teeth	3	Rate	1990	2021	-5.2051	-2.95278	-6.99746
770	5	Prevalence	60133	Agder	3	Both	27	Age-standardized	682	Caries of permanent teeth	3	Rate	1990	2021	-7.9296	-0.0988488	-14.4744
771	5	Prevalence	53618	Islamabad Capital Territory	3	Both	27	Age-standardized	682	Caries of permanent teeth	3	Rate	1990	2021	2.04155	12.3114	-6.17467
772	5	Prevalence	44889	Qom	3	Both	27	Age-standardized	682	Caries of permanent teeth	3	Rate	1990	2021	-2.43713	3.47721	-8.3502
773	5	Prevalence	94215	Organization of Islamic Cooperation	3	Both	27	Age-standardized	682	Caries of permanent teeth	3	Rate	1990	2021	-4.92833	-3.50678	-6.32545
774	5	Prevalence	53620	Punjab	3	Both	27	Age-standardized	682	Caries of permanent teeth	3	Rate	1990	2021	0.889435	9.21389	-5.49088
775	5	Prevalence	94217	Gulf Cooperation Council	3	Both	27	Age-standardized	682	Caries of permanent teeth	3	Rate	1990	2021	-3.85739	0.0129232	-7.42119
776	5	Prevalence	53616	Balochistan	3	Both	27	Age-standardized	682	Caries of permanent teeth	3	Rate	1990	2021	1.22554	9.45313	-6.85147
777	5	Prevalence	95470	Minimal Health System	3	Both	27	Age-standardized	682	Caries of permanent teeth	3	Rate	1990	2021	-2.90069	-0.294554	-5.92192
778	5	Prevalence	95471	Health System Grouping Levels	3	Both	27	Age-standardized	682	Caries of permanent teeth	3	Rate	1990	2021	-2.77175	-0.628557	-4.67214
779	5	Prevalence	95080	Brazil Central-West	3	Both	27	Age-standardized	682	Caries of permanent teeth	3	Rate	1990	2021	-7.27265	-3.40898	-11.1765
780	5	Prevalence	95079	Brazil Northeast	3	Both	27	Age-standardized	682	Caries of permanent teeth	3	Rate	1990	2021	-5.94963	-3.34384	-8.9073
781	5	Prevalence	95078	Brazil North	3	Both	27	Age-standardized	682	Caries of permanent teeth	3	Rate	1990	2021	-5.79393	-2.24448	-9.1963
782	5	Prevalence	60136	Viken	3	Both	27	Age-standardized	682	Caries of permanent teeth	3	Rate	1990	2021	-2.77109	3.44922	-9.23044
783	5	Prevalence	44878	Kermanshah	3	Both	27	Age-standardized	682	Caries of permanent teeth	3	Rate	1990	2021	-3.30455	2.76328	-8.58852
784	5	Prevalence	60132	Vestland	3	Both	27	Age-standardized	682	Caries of permanent teeth	3	Rate	1990	2021	-3.33214	3.42146	-10.6078
785	5	Prevalence	95469	Limited Health System	3	Both	27	Age-standardized	682	Caries of permanent teeth	3	Rate	1990	2021	-5.17876	-3.39099	-6.74899
786	5	Prevalence	60134	Vestfold og Telemark	3	Both	27	Age-standardized	682	Caries of permanent teeth	3	Rate	1990	2021	-2.63515	3.41893	-8.92398
787	5	Prevalence	95082	Brazil Southeast	3	Both	27	Age-standardized	682	Caries of permanent teeth	3	Rate	1990	2021	1.36375	5.74567	-2.73422
788	5	Prevalence	95468	Basic Health System	3	Both	27	Age-standardized	682	Caries of permanent teeth	3	Rate	1990	2021	-0.0633061	3.76156	-3.67897
789	5	Prevalence	53621	Sindh	3	Both	27	Age-standardized	682	Caries of permanent teeth	3	Rate	1990	2021	2.8755	10.2748	-4.53031
790	5	Prevalence	95467	Advanced Health System	3	Both	27	Age-standardized	682	Caries of permanent teeth	3	Rate	1990	2021	-7.0592	-4.87644	-9.283
791	5	Prevalence	94216	Association of Southeast Asian Nations	3	Both	27	Age-standardized	682	Caries of permanent teeth	3	Rate	1990	2021	-6.44854	-4.17278	-8.5918
792	5	Prevalence	94365	Central Africa	3	Both	27	Age-standardized	682	Caries of permanent teeth	3	Rate	1990	2021	1.65208	5.63855	-2.28335
793	5	Prevalence	44767	Oxfordshire	3	Both	27	Age-standardized	682	Caries of permanent teeth	3	Rate	1990	2021	-1.93796	4.2081	-7.8724
794	5	Prevalence	60137	Troms og Finnmark	3	Both	27	Age-standardized	682	Caries of permanent teeth	3	Rate	1990	2021	-7.21489	-0.248042	-12.2875
795	5	Prevalence	95081	Brazil South	3	Both	27	Age-standardized	682	Caries of permanent teeth	3	Rate	1990	2021	0.71556	4.592	-3.01403
