# Supplementary material for: Global, Regional, and National Levels and Trends in Burden of Dental Caries and Periodontal Disease from 1990 to 2035：Result From the Global Burden of Disease Study 2021
Source: Research Square preprint supplement (doi:10.21203/rs.3.rs-5609270/v1), 2025-04-02
Supplement: Supplementary file 21 [file a8741347ab85220f89ac7394.xlsx]

## Sheet: Sheet1
Exported data
	measure_name	location_name	sex_name	age_name	cause_name	metric_name	year	val	upper	lower
1	Incidence	Low-middle SDI	Both	Age-standardized	Periodontal diseases	Rate	2021	1174.58	1314.31	1030.71
2	Incidence	Southeast Asia	Both	Age-standardized	Periodontal diseases	Rate	2021	898.079	1017.26	778.813
3	Incidence	Global	Both	Age-standardized	Periodontal diseases	Rate	2021	1069.44	1204.58	942.708
4	Incidence	Central Europe	Both	Age-standardized	Periodontal diseases	Rate	2021	962.944	1160.5	786.581
5	Incidence	East Asia	Both	Age-standardized	Periodontal diseases	Rate	2021	960.222	1094.59	823.182
6	Incidence	Oceania	Both	Age-standardized	Periodontal diseases	Rate	2021	261.572	359.874	196.46
7	Incidence	Central Asia	Both	Age-standardized	Periodontal diseases	Rate	2021	951.747	1159.99	760.914
8	Incidence	Western Europe	Both	Age-standardized	Periodontal diseases	Rate	2021	841.699	1008.33	694.513
9	Incidence	Eastern Europe	Both	Age-standardized	Periodontal diseases	Rate	2021	1031.36	1229.99	849.563
10	Incidence	Australasia	Both	Age-standardized	Periodontal diseases	Rate	2021	931.829	1143.69	744.956
11	Incidence	High-income Asia Pacific	Both	Age-standardized	Periodontal diseases	Rate	2021	839.838	1023.86	665.342
12	Incidence	High-income North America	Both	Age-standardized	Periodontal diseases	Rate	2021	922.284	1058.1	792.491
13	Incidence	Caribbean	Both	Age-standardized	Periodontal diseases	Rate	2021	1138.31	1335.36	943.484
14	Incidence	Southern Latin America	Both	Age-standardized	Periodontal diseases	Rate	2021	1095.32	1317.01	884.913
15	Incidence	Central Latin America	Both	Age-standardized	Periodontal diseases	Rate	2021	1196.97	1365.93	1033.36
16	Incidence	Tropical Latin America	Both	Age-standardized	Periodontal diseases	Rate	2021	1161.97	1295.82	1001.28
17	Incidence	North Africa and Middle East	Both	Age-standardized	Periodontal diseases	Rate	2021	1056.6	1238.97	902.981
18	Incidence	South Asia	Both	Age-standardized	Periodontal diseases	Rate	2021	1288.55	1428.39	1138.93
19	Incidence	Central Sub-Saharan Africa	Both	Age-standardized	Periodontal diseases	Rate	2021	845.508	1080.53	644.789
20	Incidence	Southern Sub-Saharan Africa	Both	Age-standardized	Periodontal diseases	Rate	2021	580.461	721.858	473.172
21	Incidence	Eastern Sub-Saharan Africa	Both	Age-standardized	Periodontal diseases	Rate	2021	998.145	1157.03	846.705
22	Incidence	Western Sub-Saharan Africa	Both	Age-standardized	Periodontal diseases	Rate	2021	942.948	1075.34	818.251
23	Incidence	High SDI	Both	Age-standardized	Periodontal diseases	Rate	2021	927.317	1084.81	793.306
24	Incidence	Low SDI	Both	Age-standardized	Periodontal diseases	Rate	2021	1032.5	1174.38	884.679
25	Incidence	High-middle SDI	Both	Age-standardized	Periodontal diseases	Rate	2021	970.971	1128.41	832.754
26	Incidence	Middle SDI	Both	Age-standardized	Periodontal diseases	Rate	2021	1064.11	1186.6	933.752
27	Incidence	Southeast Asia	Both	Age-standardized	Caries of permanent teeth	Rate	2021	34777	39145.8	30584.2
28	Incidence	East Asia	Both	Age-standardized	Caries of permanent teeth	Rate	2021	23398.8	27254.2	20107.3
29	Incidence	Oceania	Both	Age-standardized	Caries of permanent teeth	Rate	2021	27635.4	32571.6	22847.5
30	Incidence	Global	Both	Age-standardized	Caries of permanent teeth	Rate	2021	29777	33490.9	26310.3
31	Incidence	Central Asia	Both	Age-standardized	Caries of permanent teeth	Rate	2021	31938.4	36708.3	27490.8
32	Incidence	Eastern Europe	Both	Age-standardized	Caries of permanent teeth	Rate	2021	33777.2	38087.8	29488.5
33	Incidence	High-income Asia Pacific	Both	Age-standardized	Caries of permanent teeth	Rate	2021	28451.2	31636.2	25056.2
34	Incidence	Australasia	Both	Age-standardized	Caries of permanent teeth	Rate	2021	29326.4	33967.3	25154.8
35	Incidence	Central Europe	Both	Age-standardized	Caries of permanent teeth	Rate	2021	32337.4	36187.3	28382
36	Incidence	Western Europe	Both	Age-standardized	Caries of permanent teeth	Rate	2021	30501.9	33939	27074.6
37	Incidence	High-income North America	Both	Age-standardized	Caries of permanent teeth	Rate	2021	30898.2	34828.5	26814.1
38	Incidence	North Africa and Middle East	Both	Age-standardized	Caries of permanent teeth	Rate	2021	31920.1	36314.9	27848.9
39	Incidence	Caribbean	Both	Age-standardized	Caries of permanent teeth	Rate	2021	32777	36353	29399.9
40	Incidence	Tropical Latin America	Both	Age-standardized	Caries of permanent teeth	Rate	2021	36541.1	41303.3	31903.8
41	Incidence	Eastern Sub-Saharan Africa	Both	Age-standardized	Caries of permanent teeth	Rate	2021	28721.3	32337.8	25373.7
42	Incidence	Central Sub-Saharan Africa	Both	Age-standardized	Caries of permanent teeth	Rate	2021	28039.3	32874.6	23456.5
43	Incidence	Southern Latin America	Both	Age-standardized	Caries of permanent teeth	Rate	2021	30254.9	34581	26673.9
44	Incidence	Southern Sub-Saharan Africa	Both	Age-standardized	Caries of permanent teeth	Rate	2021	27538.2	31619.4	23935.1
45	Incidence	Central Latin America	Both	Age-standardized	Caries of permanent teeth	Rate	2021	30652.1	35143.8	26663.7
46	Incidence	Western Sub-Saharan Africa	Both	Age-standardized	Caries of permanent teeth	Rate	2021	28028.7	31354.9	24756.1
47	Incidence	South Asia	Both	Age-standardized	Caries of permanent teeth	Rate	2021	31398.8	35248.1	27644.3
48	Incidence	Low SDI	Both	Age-standardized	Caries of permanent teeth	Rate	2021	29403.8	33007.6	25802
49	Incidence	High-middle SDI	Both	Age-standardized	Caries of permanent teeth	Rate	2021	28068.9	31973.9	24352
50	Incidence	Middle SDI	Both	Age-standardized	Caries of permanent teeth	Rate	2021	29951.7	33821.6	26314.1
51	Incidence	Low-middle SDI	Both	Age-standardized	Caries of permanent teeth	Rate	2021	31182.5	35209.3	27260.3
52	Incidence	High SDI	Both	Age-standardized	Caries of permanent teeth	Rate	2021	30049	33354.5	26769.2
53	Incidence	Low-middle SDI	Both	Age-standardized	Caries of deciduous teeth	Rate	2021	17293.1	21823.3	13537.7
54	Incidence	Southeast Asia	Both	Age-standardized	Caries of deciduous teeth	Rate	2021	20366.8	29250.6	15173
55	Incidence	Global	Both	Age-standardized	Caries of deciduous teeth	Rate	2021	17781.1	23035.4	13952.4
56	Incidence	Central Europe	Both	Age-standardized	Caries of deciduous teeth	Rate	2021	20299.2	28722.8	14961.6
57	Incidence	East Asia	Both	Age-standardized	Caries of deciduous teeth	Rate	2021	19535.6	26418.8	14782.7
58	Incidence	Oceania	Both	Age-standardized	Caries of deciduous teeth	Rate	2021	20143.5	28580.4	14576.9
59	Incidence	Central Asia	Both	Age-standardized	Caries of deciduous teeth	Rate	2021	20660.8	29103.2	15171.2
60	Incidence	Western Europe	Both	Age-standardized	Caries of deciduous teeth	Rate	2021	13958	18969.1	10274.6
61	Incidence	Eastern Europe	Both	Age-standardized	Caries of deciduous teeth	Rate	2021	20737.5	29309.7	15482.4
62	Incidence	Australasia	Both	Age-standardized	Caries of deciduous teeth	Rate	2021	20188	25108.9	14372.5
63	Incidence	High-income Asia Pacific	Both	Age-standardized	Caries of deciduous teeth	Rate	2021	17734.5	22399.7	14055.5
64	Incidence	High-income North America	Both	Age-standardized	Caries of deciduous teeth	Rate	2021	17066.2	21614.1	12243.3
65	Incidence	Caribbean	Both	Age-standardized	Caries of deciduous teeth	Rate	2021	17357.9	21465.2	13436.8
66	Incidence	Southern Latin America	Both	Age-standardized	Caries of deciduous teeth	Rate	2021	18955.3	25968.3	13692.4
67	Incidence	Central Latin America	Both	Age-standardized	Caries of deciduous teeth	Rate	2021	17455.3	21568.7	13711.3
68	Incidence	Tropical Latin America	Both	Age-standardized	Caries of deciduous teeth	Rate	2021	20346.1	29159.7	14535.3
69	Incidence	North Africa and Middle East	Both	Age-standardized	Caries of deciduous teeth	Rate	2021	16170.9	20082.2	12510.7
70	Incidence	South Asia	Both	Age-standardized	Caries of deciduous teeth	Rate	2021	17488.2	22367.4	13708.1
71	Incidence	Central Sub-Saharan Africa	Both	Age-standardized	Caries of deciduous teeth	Rate	2021	13581.4	18153.8	8982.29
72	Incidence	Southern Sub-Saharan Africa	Both	Age-standardized	Caries of deciduous teeth	Rate	2021	18238.4	23382	13484.3
73	Incidence	Eastern Sub-Saharan Africa	Both	Age-standardized	Caries of deciduous teeth	Rate	2021	16818.2	21313.3	13182.3
74	Incidence	Western Sub-Saharan Africa	Both	Age-standardized	Caries of deciduous teeth	Rate	2021	16945.2	21594.7	12928.7
75	Incidence	High SDI	Both	Age-standardized	Caries of deciduous teeth	Rate	2021	16609.6	21501.7	12657.6
76	Incidence	Low SDI	Both	Age-standardized	Caries of deciduous teeth	Rate	2021	16807.8	21158.8	13200.7
77	Incidence	High-middle SDI	Both	Age-standardized	Caries of deciduous teeth	Rate	2021	19383.7	26602.5	14609.2
78	Incidence	Middle SDI	Both	Age-standardized	Caries of deciduous teeth	Rate	2021	18716.1	24984.6	14560.2
