# Supplementary material for: Global, Regional, and National Levels and Trends in Burden of Dental Caries and Periodontal Disease from 1990 to 2035：Result From the Global Burden of Disease Study 2021
Source: Research Square preprint supplement (doi:10.21203/rs.3.rs-5609270/v1), 2025-04-02
Supplement: Supplementary file 22 [file bc336000124d37dee1fd2299.xlsx]

## Sheet: Sheet1
Exported data
	measure_name	location_name	sex_name	age_name	cause_name	metric_name	year	val	upper	lower
1	Prevalence	Global	Male	5-9 years	Periodontal diseases	Number	2021	0	0	0
2	Prevalence	Global	Female	5-9 years	Periodontal diseases	Number	2021	0	0	0
3	Prevalence	Global	Male	5-9 years	Periodontal diseases	Percent	2021	0	0	0
4	Prevalence	Global	Female	5-9 years	Periodontal diseases	Percent	2021	0	0	0
5	Prevalence	Global	Male	5-9 years	Periodontal diseases	Rate	2021	0	0	0
6	Prevalence	Global	Female	5-9 years	Periodontal diseases	Rate	2021	0	0	0
7	Prevalence	Global	Male	10-14 years	Periodontal diseases	Number	2021	0	0	0
8	Prevalence	Global	Female	10-14 years	Periodontal diseases	Number	2021	0	0	0
9	Prevalence	Global	Male	10-14 years	Periodontal diseases	Percent	2021	0	0	0
10	Prevalence	Global	Female	10-14 years	Periodontal diseases	Percent	2021	0	0	0
11	Prevalence	Global	Male	10-14 years	Periodontal diseases	Rate	2021	0	0	0
12	Prevalence	Global	Female	10-14 years	Periodontal diseases	Rate	2021	0	0	0
13	Prevalence	Global	Male	15-19 years	Periodontal diseases	Number	2021	4.26901e+06	6.39995e+06	2.65052e+06
14	Prevalence	Global	Female	15-19 years	Periodontal diseases	Number	2021	3.87637e+06	5.86939e+06	2.38917e+06
15	Prevalence	Global	Male	15-19 years	Periodontal diseases	Percent	2021	0.014142	0.0212394	0.00877063
16	Prevalence	Global	Female	15-19 years	Periodontal diseases	Percent	2021	0.0129878	0.019664	0.00800094
17	Prevalence	Global	Male	15-19 years	Periodontal diseases	Rate	2021	1332.69	1997.93	827.435
18	Prevalence	Global	Female	15-19 years	Periodontal diseases	Rate	2021	1276.59	1932.95	786.817
19	Prevalence	Global	Male	25-29 years	Periodontal diseases	Number	2021	2.67775e+07	3.70753e+07	1.81684e+07
20	Prevalence	Global	Female	25-29 years	Periodontal diseases	Number	2021	2.56562e+07	3.57404e+07	1.73244e+07
21	Prevalence	Global	Male	25-29 years	Periodontal diseases	Percent	2021	0.0923375	0.127815	0.06273
22	Prevalence	Global	Female	25-29 years	Periodontal diseases	Percent	2021	0.0885258	0.123333	0.0597479
23	Prevalence	Global	Male	25-29 years	Periodontal diseases	Rate	2021	9005.21	12468.3	6110
24	Prevalence	Global	Female	25-29 years	Periodontal diseases	Rate	2021	8816.95	12282.5	5953.65
25	Prevalence	Global	Male	30-34 years	Periodontal diseases	Number	2021	4.25392e+07	5.70919e+07	3.00382e+07
26	Prevalence	Global	Female	30-34 years	Periodontal diseases	Number	2021	4.05857e+07	5.47357e+07	2.85897e+07
27	Prevalence	Global	Male	30-34 years	Periodontal diseases	Percent	2021	0.141677	0.190317	0.100113
28	Prevalence	Global	Female	30-34 years	Periodontal diseases	Percent	2021	0.136108	0.183682	0.0958328
29	Prevalence	Global	Male	30-34 years	Periodontal diseases	Rate	2021	13922.2	18685	9830.89
30	Prevalence	Global	Female	30-34 years	Periodontal diseases	Rate	2021	13576.9	18310.5	9563.97
31	Prevalence	Global	Male	35-39 years	Periodontal diseases	Number	2021	5.46939e+07	7.08611e+07	3.98148e+07
32	Prevalence	Global	Female	35-39 years	Periodontal diseases	Number	2021	5.21636e+07	6.78046e+07	3.8149e+07
33	Prevalence	Global	Male	35-39 years	Periodontal diseases	Percent	2021	0.195558	0.253122	0.142635
34	Prevalence	Global	Female	35-39 years	Periodontal diseases	Percent	2021	0.188023	0.244329	0.137573
35	Prevalence	Global	Male	35-39 years	Periodontal diseases	Rate	2021	19322.2	25033.7	14065.7
36	Prevalence	Global	Female	35-39 years	Periodontal diseases	Rate	2021	18777.2	24407.5	13732.4
37	Prevalence	Global	Male	40-44 years	Periodontal diseases	Number	2021	6.12541e+07	7.76103e+07	4.62668e+07
38	Prevalence	Global	Female	40-44 years	Periodontal diseases	Number	2021	5.84895e+07	7.43673e+07	4.41276e+07
39	Prevalence	Global	Male	40-44 years	Periodontal diseases	Percent	2021	0.244868	0.309968	0.185044
40	Prevalence	Global	Female	40-44 years	Periodontal diseases	Percent	2021	0.235961	0.299982	0.178016
41	Prevalence	Global	Male	40-44 years	Periodontal diseases	Rate	2021	24291.7	30778.1	18348.1
42	Prevalence	Global	Female	40-44 years	Periodontal diseases	Rate	2021	23575.9	29976	17787
43	Prevalence	Global	Male	45-49 years	Periodontal diseases	Number	2021	6.67322e+07	8.07904e+07	5.22387e+07
44	Prevalence	Global	Female	45-49 years	Periodontal diseases	Number	2021	6.3981e+07	7.74082e+07	4.99543e+07
45	Prevalence	Global	Male	45-49 years	Periodontal diseases	Percent	2021	0.282069	0.341779	0.220913
46	Prevalence	Global	Female	45-49 years	Periodontal diseases	Percent	2021	0.271761	0.328841	0.212235
47	Prevalence	Global	Male	45-49 years	Periodontal diseases	Rate	2021	28055	33965.2	21961.8
48	Prevalence	Global	Female	45-49 years	Periodontal diseases	Rate	2021	27151.7	32849.8	21199.2
49	Prevalence	Global	Male	50-54 years	Periodontal diseases	Number	2021	6.77307e+07	8.01998e+07	5.44364e+07
50	Prevalence	Global	Female	50-54 years	Periodontal diseases	Number	2021	6.57246e+07	7.81908e+07	5.2627e+07
51	Prevalence	Global	Male	50-54 years	Periodontal diseases	Percent	2021	0.306102	0.362352	0.245864
52	Prevalence	Global	Female	50-54 years	Periodontal diseases	Percent	2021	0.295069	0.351014	0.23628
53	Prevalence	Global	Male	50-54 years	Periodontal diseases	Rate	2021	30512	36129.2	24523.1
54	Prevalence	Global	Female	50-54 years	Periodontal diseases	Rate	2021	29480.5	35072.2	23605.6
55	Prevalence	Global	Male	55-59 years	Periodontal diseases	Number	2021	6.06871e+07	7.11253e+07	4.89951e+07
56	Prevalence	Global	Female	55-59 years	Periodontal diseases	Number	2021	6.03218e+07	7.10667e+07	4.85763e+07
57	Prevalence	Global	Male	55-59 years	Periodontal diseases	Percent	2021	0.312146	0.365737	0.252027
58	Prevalence	Global	Female	55-59 years	Periodontal diseases	Percent	2021	0.300292	0.35376	0.241841
59	Prevalence	Global	Male	55-59 years	Periodontal diseases	Rate	2021	31165.6	36526.1	25161.2
60	Prevalence	Global	Female	55-59 years	Periodontal diseases	Rate	2021	30010.3	35356	24166.9
61	Prevalence	Global	Male	60-64 years	Periodontal diseases	Number	2021	4.67007e+07	5.48431e+07	3.7286e+07
62	Prevalence	Global	Female	60-64 years	Periodontal diseases	Number	2021	4.70634e+07	5.54523e+07	3.77222e+07
63	Prevalence	Global	Male	60-64 years	Periodontal diseases	Percent	2021	0.300491	0.352854	0.239906
64	Prevalence	Global	Female	60-64 years	Periodontal diseases	Percent	2021	0.286192	0.337194	0.229412
65	Prevalence	Global	Male	60-64 years	Periodontal diseases	Rate	2021	30025.5	35260.5	23972.5
66	Prevalence	Global	Female	60-64 years	Periodontal diseases	Rate	2021	28608.1	33707.4	22929.9
67	Prevalence	Global	Male	65-69 years	Periodontal diseases	Number	2021	3.76395e+07	4.423e+07	3.09073e+07
68	Prevalence	Global	Female	65-69 years	Periodontal diseases	Number	2021	3.86355e+07	4.56565e+07	3.16061e+07
69	Prevalence	Global	Male	65-69 years	Periodontal diseases	Percent	2021	0.285598	0.335606	0.23451
70	Prevalence	Global	Female	65-69 years	Periodontal diseases	Percent	2021	0.268334	0.317088	0.219514
71	Prevalence	Global	Male	65-69 years	Periodontal diseases	Rate	2021	28550.8	33549.9	23444.2
72	Prevalence	Global	Female	65-69 years	Periodontal diseases	Rate	2021	26828.5	31703.9	21947.3
73	Prevalence	Global	Male	70+ years	Periodontal diseases	Number	2021	5.36753e+07	6.36152e+07	4.35951e+07
74	Prevalence	Global	Female	70+ years	Periodontal diseases	Number	2021	6.20222e+07	7.43991e+07	5.04113e+07
75	Prevalence	Global	Male	70+ years	Periodontal diseases	Percent	2021	0.246889	0.292613	0.200525
76	Prevalence	Global	Female	70+ years	Periodontal diseases	Percent	2021	0.223962	0.268655	0.182036
77	Prevalence	Global	Male	70+ years	Periodontal diseases	Rate	2021	24687	29258.7	20050.8
78	Prevalence	Global	Female	70+ years	Periodontal diseases	Rate	2021	22395.1	26864.2	18202.6
79	Prevalence	Global	Male	20-24 years	Periodontal diseases	Number	2021	1.32527e+07	1.89941e+07	8.86296e+06
80	Prevalence	Global	Female	20-24 years	Periodontal diseases	Number	2021	1.24821e+07	1.79619e+07	8.3321e+06
81	Prevalence	Global	Male	20-24 years	Periodontal diseases	Percent	2021	0.0454076	0.064734	0.0302305
82	Prevalence	Global	Female	20-24 years	Periodontal diseases	Percent	2021	0.042803	0.0614734	0.028518
83	Prevalence	Global	Male	20-24 years	Periodontal diseases	Rate	2021	4367.96	6260.28	2921.15
84	Prevalence	Global	Female	20-24 years	Periodontal diseases	Rate	2021	4249.18	6114.64	2836.44
