# Supplementary material for: Global, Regional, and National Levels and Trends in Burden of Dental Caries and Periodontal Disease from 1990 to 2035：Result From the Global Burden of Disease Study 2021
Source: Research Square preprint supplement (doi:10.21203/rs.3.rs-5609270/v1), 2025-04-02
Supplement: Supplementary file 23 [file bdd9015ebdaac6a2e04ab1da.xlsx]

## Sheet: Sheet1
Exported data
	val	sd	Time	group	low_50	up_50	low_60	up_60	low_70	up_70	low_80	up_80	low	up
1	35008.8	3.11409	1990	<5 years	35006.7	35010.9	35006.2	35011.4	35005.6	35012	35004.8	35012.8	35002.7	35014.9
2	34905.6	3.11109	1991	<5 years	34903.5	34907.7	34903	34908.2	34902.4	34908.8	34901.6	34909.6	34899.5	34911.7
3	34821.5	3.11048	1992	<5 years	34819.4	34823.6	34818.9	34824.1	34818.3	34824.8	34817.5	34825.5	34815.4	34827.6
4	34694.8	3.1114	1993	<5 years	34692.7	34696.9	34692.2	34697.5	34691.6	34698.1	34690.8	34698.8	34688.7	34700.9
5	34524.9	3.11361	1994	<5 years	34522.9	34527	34522.3	34527.6	34521.7	34528.2	34521	34528.9	34518.8	34531.1
6	34354	3.11669	1995	<5 years	34351.9	34356.1	34351.4	34356.7	34350.8	34357.3	34350	34358	34347.9	34360.2
7	34198	3.11884	1996	<5 years	34195.9	34200.1	34195.3	34200.6	34194.7	34201.2	34194	34202	34191.8	34204.1
8	34050	3.11992	1997	<5 years	34047.9	34052.1	34047.3	34052.6	34046.7	34053.2	34046	34054	34043.9	34056.1
9	33911.7	3.12043	1998	<5 years	33909.6	33913.8	33909.1	33914.4	33908.5	33915	33907.7	33915.7	33905.6	33917.8
10	33778.7	3.12025	1999	<5 years	33776.6	33780.8	33776.1	33781.3	33775.5	33782	33774.7	33782.7	33772.6	33784.8
11	33649.8	3.11926	2000	<5 years	33647.7	33651.9	33647.2	33652.5	33646.6	33653.1	33645.8	33653.8	33643.7	33655.9
12	33510.8	3.11709	2001	<5 years	33508.7	33512.9	33508.2	33513.5	33507.6	33514.1	33506.8	33514.8	33504.7	33516.9
13	33363.9	3.11353	2002	<5 years	33361.8	33366	33361.3	33366.5	33360.7	33367.1	33359.9	33367.9	33357.8	33370
14	33229.2	3.10856	2003	<5 years	33227.1	33231.3	33226.6	33231.8	33226	33232.4	33225.2	33233.2	33223.1	33235.3
15	33114.2	3.10256	2004	<5 years	33112.1	33116.2	33111.5	33116.8	33110.9	33117.4	33110.2	33118.1	33108.1	33120.2
16	33013.5	3.09566	2005	<5 years	33011.4	33015.6	33010.9	33016.1	33010.3	33016.7	33009.5	33017.5	33007.4	33019.6
17	32883.2	3.08732	2006	<5 years	32881.2	32885.3	32880.6	32885.8	32880	32886.4	32879.3	32887.2	32877.2	32889.3
18	32711.8	3.07749	2007	<5 years	32709.7	32713.8	32709.2	32714.4	32708.6	32715	32707.8	32715.7	32705.7	32717.8
19	32559.8	3.0671	2008	<5 years	32557.7	32561.8	32557.2	32562.3	32556.6	32562.9	32555.8	32563.7	32553.7	32565.8
20	32481.3	3.05713	2009	<5 years	32479.2	32483.3	32478.7	32483.8	32478.1	32484.4	32477.3	32485.2	32475.3	32487.3
21	32514.7	3.04944	2010	<5 years	32512.7	32516.8	32512.2	32517.3	32511.6	32517.9	32510.8	32518.6	32508.7	32520.7
22	32637.3	3.0446	2011	<5 years	32635.2	32639.3	32634.7	32639.8	32634.1	32640.4	32633.4	32641.2	32631.3	32643.2
23	32717.1	3.04029	2012	<5 years	32715.1	32719.2	32714.6	32719.7	32714	32720.3	32713.2	32721	32711.2	32723.1
24	32726.2	3.03586	2013	<5 years	32724.1	32728.2	32723.6	32728.7	32723	32729.3	32722.3	32730.1	32720.2	32732.1
25	32752.2	3.03193	2014	<5 years	32750.2	32754.3	32749.7	32754.8	32749.1	32755.4	32748.3	32756.1	32746.3	32758.2
26	32786.1	3.027	2015	<5 years	32784.1	32788.2	32783.6	32788.7	32783	32789.3	32782.2	32790	32780.2	32792.1
27	32820.8	3.02121	2016	<5 years	32818.7	32822.8	32818.2	32823.3	32817.6	32823.9	32816.9	32824.6	32814.8	32826.7
28	32931.2	3.01812	2017	<5 years	32929.2	32933.3	32928.7	32933.8	32928.1	32934.3	32927.4	32935.1	32925.3	32937.1
29	33141.9	3.01977	2018	<5 years	33139.9	33144	33139.4	33144.5	33138.8	33145.1	33138.1	33145.8	33136	33147.8
30	33398.2	3.02603	2019	<5 years	33396.2	33400.3	33395.7	33400.8	33395.1	33401.4	33394.4	33402.1	33392.3	33404.2
31	33918	3.03906	2020	<5 years	33915.9	33920	33915.4	33920.5	33914.8	33921.1	33914.1	33921.9	33912	33923.9
32	33579.9	3.05171	2021	<5 years	33577.9	33582	33577.4	33582.5	33576.8	33583.1	33576	33583.9	33574	33585.9
33	33841.9	1069.65	2022	<5 years	33121	34562.9	32942.3	34741.5	32733.8	34950.1	32470.6	35213.2	31745.4	35938.4
34	34128.2	1278.91	2023	<5 years	33266.2	34990.2	33052.7	35203.8	32803.3	35453.2	32488.7	35767.8	31621.6	36634.9
35	34420	1534.11	2024	<5 years	33386	35454	33129.8	35710.2	32830.7	36009.3	32453.3	36386.7	31413.1	37426.8
36	34718	1831.25	2025	<5 years	33483.7	35952.2	33177.9	36258	32820.8	36615.1	32370.3	37065.6	31128.7	38307.2
37	35022.8	2166.98	2026	<5 years	33562.3	36483.4	33200.4	36845.3	32777.8	37267.8	32244.8	37800.9	30775.6	39270.1
38	35335.4	2538.82	2027	<5 years	33624.3	37046.6	33200.3	37470.6	32705.2	37965.6	32080.6	38590.2	30359.3	40311.5
39	35656.5	2945.15	2028	<5 years	33671.4	37641.5	33179.6	38133.3	32605.3	38707.6	31880.8	39432.2	29884	41429
40	35986.9	3385	2029	<5 years	33705.4	38268.3	33140.1	38833.6	32480	39493.7	31647.3	40326.4	29352.3	42621.5
41	36327.4	3857.98	2030	<5 years	33727.1	38927.7	33082.9	39572	32330.6	40324.3	31381.5	41273.4	28765.8	43889.1
42	36679.1	4364.12	2031	<5 years	33737.6	39620.5	33008.8	40349.3	32157.8	41200.3	31084.3	42273.9	28125.4	45232.7
43	37042.7	4903.84	2032	<5 years	33737.5	40347.9	32918.6	41166.8	31962.3	42123.1	30756	43329.4	27431.2	46654.2
44	37419.3	5477.88	2033	<5 years	33727.2	41111.4	32812.4	42026.2	31744.2	43094.4	30396.6	44441.9	26682.6	48155.9
45	37809.9	6087.3	2034	<5 years	33707	41912.7	32690.4	42929.3	31503.4	44116.3	30005.9	45613.8	25878.8	49741
46	38215.5	6733.45	2035	<5 years	33677.1	42753.8	32552.6	43878.3	31239.6	45191.3	29583.2	46847.8	25017.9	51413
47	41641.5	3.25426	1990	5-9 years	41639.3	41643.7	41638.7	41644.2	41638.1	41644.8	41637.3	41645.6	41635.1	41647.9
48	41604.2	3.23631	1991	5-9 years	41602	41606.4	41601.5	41606.9	41600.8	41607.5	41600	41608.3	41597.8	41610.5
49	41576.1	3.22028	1992	5-9 years	41574	41578.3	41573.4	41578.8	41572.8	41579.5	41572	41580.3	41569.8	41582.4
50	41555.4	3.20754	1993	5-9 years	41553.3	41557.6	41552.7	41558.1	41552.1	41558.8	41551.3	41559.5	41549.1	41561.7
51	41541.2	3.19917	1994	5-9 years	41539	41543.3	41538.5	41543.9	41537.9	41544.5	41537.1	41545.3	41534.9	41547.4
52	41536.7	3.19511	1995	5-9 years	41534.6	41538.9	41534	41539.4	41533.4	41540	41532.6	41540.8	41530.4	41543
53	41526.2	3.19513	1996	5-9 years	41524.1	41528.4	41523.5	41528.9	41522.9	41529.5	41522.1	41530.3	41520	41532.5
54	41496.9	3.19838	1997	5-9 years	41494.7	41499	41494.2	41499.6	41493.6	41500.2	41492.8	41501	41490.6	41503.1
55	41455.6	3.20374	1998	5-9 years	41453.4	41457.8	41452.9	41458.3	41452.3	41458.9	41451.5	41459.7	41449.3	41461.9
56	41409.3	3.21036	1999	5-9 years	41407.1	41411.4	41406.6	41412	41406	41412.6	41405.2	41413.4	41403	41415.6
57	41363.3	3.21703	2000	5-9 years	41361.1	41365.5	41360.6	41366	41360	41366.6	41359.2	41367.4	41357	41369.6
58	41257	3.22045	2001	5-9 years	41254.9	41259.2	41254.3	41259.7	41253.7	41260.4	41252.9	41261.2	41250.7	41263.3
59	41058.9	3.22013	2002	5-9 years	41056.7	41061.1	41056.2	41061.6	41055.6	41062.3	41054.8	41063	41052.6	41065.2
60	40824.3	3.21793	2003	5-9 years	40822.2	40826.5	40821.6	40827.1	40821	40827.7	40820.2	40828.5	40818	40830.7
61	40611.7	3.21495	2004	5-9 years	40609.6	40613.9	40609	40614.4	40608.4	40615.1	40607.6	40615.9	40605.4	40618
62	40482.1	3.21197	2005	5-9 years	40479.9	40484.3	40479.4	40484.8	40478.8	40485.4	40478	40486.2	40475.8	40488.4
63	40390.4	3.20828	2006	5-9 years	40388.3	40392.6	40387.7	40393.1	40387.1	40393.8	40386.3	40394.5	40384.1	40396.7
64	40266.2	3.20282	2007	5-9 years	40264.1	40268.4	40263.5	40268.9	40262.9	40269.6	40262.1	40270.3	40260	40272.5
65	40131.5	3.19544	2008	5-9 years	40129.4	40133.7	40128.9	40134.2	40128.2	40134.9	40127.5	40135.6	40125.3	40137.8
66	40007	3.18633	2009	5-9 years	40004.9	40009.1	40004.3	40009.7	40003.7	40010.3	40002.9	40011.1	40000.8	40013.2
67	39913.2	3.17623	2010	5-9 years	39911	39915.3	39910.5	39915.8	39909.9	39916.5	39909.1	39917.2	39906.9	39919.4
68	39834.8	3.16439	2011	5-9 years	39832.7	39836.9	39832.1	39837.5	39831.5	39838.1	39830.7	39838.9	39828.6	39841
69	39751.4	3.15043	2012	5-9 years	39749.3	39753.5	39748.7	39754	39748.1	39754.6	39747.3	39755.4	39745.2	39757.6
70	39675.7	3.13549	2013	5-9 years	39673.6	39677.8	39673.1	39678.3	39672.5	39679	39671.7	39679.7	39669.6	39681.9
71	39616.9	3.12101	2014	5-9 years	39614.8	39619	39614.3	39619.5	39613.7	39620.1	39612.9	39620.9	39610.8	39623
72	39579.9	3.10899	2015	5-9 years	39577.8	39582	39577.2	39582.5	39576.6	39583.1	39575.9	39583.8	39573.8	39586
73	39587.9	3.10035	2016	5-9 years	39585.8	39590	39585.3	39590.5	39584.7	39591.1	39584	39591.9	39581.9	39594
74	39642.9	3.09336	2017	5-9 years	39640.8	39645	39640.3	39645.5	39639.7	39646.1	39638.9	39646.8	39636.8	39648.9
75	39714.2	3.08684	2018	5-9 years	39712.1	39716.3	39711.6	39716.8	39711	39717.4	39710.2	39718.1	39708.1	39720.2
76	39769.4	3.08064	2019	5-9 years	39767.3	39771.5	39766.8	39772	39766.2	39772.6	39765.4	39773.3	39763.4	39775.4
77	39965.7	3.07481	2020	5-9 years	39963.6	39967.8	39963.1	39968.3	39962.5	39968.9	39961.7	39969.6	39959.7	39971.7
78	39735.1	3.06392	2021	5-9 years	39733	39737.2	39732.5	39737.7	39731.9	39738.3	39731.2	39739	39729.1	39741.1
79	39046.6	1048.89	2022	5-9 years	38339.7	39753.6	38164.5	39928.8	37960	40133.3	37702	40391.3	36990.8	41102.5
80	39327.2	1122.85	2023	5-9 years	38570.4	40084	38382.9	40271.5	38163.9	40490.5	37887.7	40766.7	37126.4	41528
81	39635.7	1200.83	2024	5-9 years	38826.4	40445.1	38625.8	40645.6	38391.7	40879.8	38096.2	41175.2	37282.1	41989.3
82	39964.3	1293.37	2025	5-9 years	39092.5	40836	38876.5	41052	38624.3	41304.2	38306.1	41622.4	37429.2	42499.3
83	40298	1417.25	2026	5-9 years	39342.8	41253.2	39106.1	41489.9	38829.7	41766.3	38481.1	42114.9	37520.2	43075.8
84	40636.7	1590.18	2027	5-9 years	39564.9	41708.5	39299.4	41974.1	38989.3	42284.1	38598.1	42675.3	37520	43753.5
85	40981.1	1817.37	2028	5-9 years	39756.2	42206.1	39452.7	42509.6	39098.3	42863.9	38651.3	43311	37419.1	44543.2
86	41332.1	2099.03	2029	5-9 years	39917.4	42746.9	39566.8	43097.4	39157.5	43506.7	38641.2	44023.1	37218	45446.2
87	41690.6	2432.8	2030	5-9 years	40050.8	43330.3	39644.6	43736.5	39170.2	44210.9	38571.7	44809.4	36922.3	46458.8
88	42057.3	2815.6	2031	5-9 years	40159.6	43955	39689.4	44425.2	39140.3	44974.3	38447.7	45666.9	36538.7	47575.9
89	42433.3	3244.64	2032	5-9 years	40246.4	44620.2	39704.5	45162	39071.8	45794.7	38273.7	46592.9	36073.8	48792.8
90	42819.5	3717.72	2033	5-9 years	40313.7	45325.2	39692.9	45946.1	38967.9	46671	38053.3	47585.6	35532.7	50106.2
91	43216.9	4233.38	2034	5-9 years	40363.6	46070.1	39656.6	46777.1	38831.1	47602.6	37789.7	48644	34919.4	51514.3
92	43626.5	4790.75	2035	5-9 years	40397.5	46855.4	39597.4	47655.5	38663.3	48589.7	37484.7	49768.2	34236.6	53016.3
93	6080.48	4.24909	1990	10-14 years	6077.61	6083.34	6076.9	6084.05	6076.07	6084.88	6075.03	6085.92	6072.15	6088.8
94	6055.06	4.25246	1991	10-14 years	6052.19	6057.93	6051.48	6058.64	6050.65	6059.47	6049.61	6060.51	6046.73	6063.39
95	6032.91	4.25497	1992	10-14 years	6030.04	6035.77	6029.33	6036.48	6028.5	6037.31	6027.45	6038.36	6024.57	6041.25
96	6014.47	4.25655	1993	10-14 years	6011.6	6017.34	6010.89	6018.05	6010.06	6018.88	6009.01	6019.93	6006.13	6022.81
97	6000.33	4.25718	1994	10-14 years	5997.46	6003.2	5996.75	6003.91	5995.92	6004.74	5994.87	6005.78	5991.98	6008.67
98	5992.07	4.25657	1995	10-14 years	5989.2	5994.93	5988.49	5995.65	5987.66	5996.48	5986.61	5997.52	5983.72	6000.41
99	5987.22	4.25518	1996	10-14 years	5984.35	5990.08	5983.64	5990.8	5982.81	5991.63	5981.76	5992.67	5978.88	5995.56
100	5982.99	4.25378	1997	10-14 years	5980.12	5985.86	5979.41	5986.57	5978.58	5987.4	5977.53	5988.44	5974.65	5991.33
101	5980.1	4.25249	1998	10-14 years	5977.23	5982.97	5976.52	5983.68	5975.69	5984.51	5974.65	5985.55	5971.77	5988.44
102	5978.59	4.25141	1999	10-14 years	5975.72	5981.46	5975.01	5982.17	5974.19	5982.99	5973.14	5984.04	5970.26	5986.92
103	5978.63	4.2506	2000	10-14 years	5975.76	5981.49	5975.05	5982.2	5974.22	5983.03	5973.18	5984.08	5970.3	5986.96
104	5958.11	4.25461	2001	10-14 years	5955.24	5960.98	5954.53	5961.69	5953.7	5962.52	5952.65	5963.56	5949.77	5966.45
105	5907.38	4.26526	2002	10-14 years	5904.5	5910.25	5903.79	5910.96	5902.96	5911.8	5901.91	5912.84	5899.02	5915.74
106	5844.45	4.27882	2003	10-14 years	5841.56	5847.33	5840.85	5848.04	5840.01	5848.88	5838.96	5849.93	5836.06	5852.83
107	5788.65	4.2912	2004	10-14 years	5785.76	5791.55	5785.04	5792.26	5784.21	5793.1	5783.15	5794.15	5780.24	5797.06
108	5760.88	4.29781	2005	10-14 years	5757.98	5763.77	5757.26	5764.49	5756.42	5765.33	5755.37	5766.39	5752.45	5769.3
109	5715.56	4.30793	2006	10-14 years	5712.65	5718.46	5711.93	5719.18	5711.09	5720.02	5710.03	5721.08	5707.11	5724
110	5613.52	4.3301	2007	10-14 years	5610.6	5616.44	5609.88	5617.16	5609.04	5618.01	5607.97	5619.07	5605.03	5622.01
111	5489.82	4.35743	2008	10-14 years	5486.88	5492.76	5486.15	5493.48	5485.3	5494.33	5484.23	5495.41	5481.28	5498.36
112	5381.16	4.38196	2009	10-14 years	5378.21	5384.12	5377.48	5384.85	5376.62	5385.7	5375.55	5386.78	5372.58	5389.75
113	5326.66	4.39441	2010	10-14 years	5323.7	5329.62	5322.97	5330.36	5322.11	5331.21	5321.03	5332.29	5318.05	5335.27
114	5299.8	4.40047	2011	10-14 years	5296.83	5302.76	5296.1	5303.5	5295.24	5304.36	5294.16	5305.44	5291.17	5308.42
115	5255.92	4.41041	2012	10-14 years	5252.95	5258.89	5252.21	5259.63	5251.35	5260.49	5250.27	5261.57	5247.28	5264.56
116	5207.04	4.42148	2013	10-14 years	5204.06	5210.02	5203.32	5210.75	5202.45	5211.62	5201.37	5212.7	5198.37	5215.7
117	5164.56	4.43098	2014	10-14 years	5161.58	5167.55	5160.84	5168.29	5159.97	5169.16	5158.88	5170.25	5155.88	5173.25
118	5139.13	4.43631	2015	10-14 years	5136.14	5142.12	5135.4	5142.86	5134.54	5143.73	5133.45	5144.82	5130.44	5147.83
119	5115.67	4.441	2016	10-14 years	5112.67	5118.66	5111.93	5119.4	5111.06	5120.27	5109.97	5121.36	5106.96	5124.37
120	5080.27	4.44847	2017	10-14 years	5077.27	5083.27	5076.53	5084.01	5075.66	5084.88	5074.57	5085.98	5071.55	5088.99
121	5046.78	4.45545	2018	10-14 years	5043.78	5049.78	5043.03	5050.53	5042.16	5051.4	5041.07	5052.49	5038.05	5055.51
122	5028.7	4.45868	2019	10-14 years	5025.69	5031.7	5024.95	5032.45	5024.08	5033.32	5022.98	5034.41	5019.96	5037.44
123	4910.58	4.48749	2020	10-14 years	4907.56	4913.6	4906.81	4914.35	4905.93	4915.23	4904.83	4916.33	4901.78	4919.38
124	4592.47	4.57157	2021	10-14 years	4589.39	4595.56	4588.63	4596.32	4587.74	4597.21	4586.61	4598.33	4583.51	4601.43
125	5047.9	137.354	2022	10-14 years	4955.32	5140.48	4932.39	5163.41	4905.6	5190.2	4871.81	5223.99	4778.69	5317.11
126	5087.38	146.739	2023	10-14 years	4988.48	5186.28	4963.97	5210.79	4935.36	5239.4	4899.26	5275.5	4799.77	5374.99
127	5127.39	156.109	2024	10-14 years	5022.18	5232.61	4996.11	5258.68	4965.67	5289.12	4927.26	5327.53	4821.42	5433.37
128	5165.45	165.436	2025	10-14 years	5053.94	5276.95	5026.31	5304.58	4994.05	5336.84	4953.36	5377.53	4841.19	5489.7
129	5200.94	174.919	2026	10-14 years	5083.04	5318.83	5053.83	5348.04	5019.72	5382.15	4976.69	5425.18	4858.09	5543.78
130	5235.74	184.741	2027	10-14 years	5111.22	5360.25	5080.37	5391.1	5044.35	5427.13	4998.9	5472.58	4873.65	5597.83
131	5273.42	194.718	2028	10-14 years	5142.18	5404.66	5109.66	5437.18	5071.69	5475.15	5023.79	5523.05	4891.77	5655.07
132	5314.85	205.209	2029	10-14 years	5176.54	5453.16	5142.27	5487.43	5102.25	5527.45	5051.77	5577.93	4912.64	5717.06
133	5358.96	217.302	2030	10-14 years	5212.5	5505.42	5176.21	5541.71	5133.84	5584.09	5080.38	5637.54	4933.05	5784.87
134	5403.78	232.785	2031	10-14 years	5246.88	5560.67	5208	5599.55	5162.61	5644.94	5105.35	5702.21	4947.52	5860.04
135	5449.25	253.801	2032	10-14 years	5278.19	5620.31	5235.81	5662.7	5186.31	5712.19	5123.88	5774.63	4951.8	5946.7
136	5495.5	281.419	2033	10-14 years	5305.82	5685.17	5258.82	5732.17	5203.95	5787.05	5134.72	5856.28	4943.92	6047.08
137	5542.62	316.154	2034	10-14 years	5329.54	5755.71	5276.74	5808.51	5215.09	5870.16	5137.31	5947.93	4922.96	6162.28
138	5590.75	358.022	2035	10-14 years	5349.44	5832.05	5289.65	5891.84	5219.83	5961.66	5131.76	6049.73	4889.02	6292.47
