# Supplementary material for: Global, Regional, and National Levels and Trends in Burden of Dental Caries and Periodontal Disease from 1990 to 2035：Result From the Global Burden of Disease Study 2021
Source: Research Square preprint supplement (doi:10.21203/rs.3.rs-5609270/v1), 2025-04-02
Supplement: Supplementary file 24 [file d5ddf10da7275431c8479895.xlsx]

## Sheet: Sheet1
Exported data
	measure_name	location_name	sex_name	age_name	cause_name	metric_name	year	val	upper	lower
1	Prevalence	Southeast Asia	Both	10-14 years	Caries of deciduous teeth	Rate	2021	6193.67	10957.4	2097.46
2	Prevalence	Southeast Asia	Both	2-4 years	Caries of deciduous teeth	Rate	1990	64415.4	75224.6	50772.7
3	Prevalence	Southeast Asia	Both	2-4 years	Caries of deciduous teeth	Rate	2021	61592.2	72096.4	48344.4
4	Prevalence	Australasia	Both	5-9 years	Caries of deciduous teeth	Rate	1990	24027.1	26347	21732.3
5	Prevalence	Australasia	Both	5-9 years	Caries of deciduous teeth	Rate	2021	57324.5	65478.9	47106.5
6	Prevalence	Australasia	Both	10-14 years	Caries of deciduous teeth	Rate	1990	6692.01	7662.36	5736.37
7	Prevalence	Western Europe	Both	5-9 years	Caries of deciduous teeth	Rate	1990	38611.3	46713.3	31845.2
8	Prevalence	Western Europe	Both	5-9 years	Caries of deciduous teeth	Rate	2021	31246.8	40170.1	23759.5
9	Prevalence	Western Europe	Both	10-14 years	Caries of deciduous teeth	Rate	1990	7670.85	11687.1	4230.28
10	Prevalence	Central Latin America	Both	5-9 years	Caries of deciduous teeth	Rate	1990	39785.2	52503.3	29083.2
11	Prevalence	Central Latin America	Both	5-9 years	Caries of deciduous teeth	Rate	2021	39172.6	48238.5	30713.4
12	Prevalence	Central Latin America	Both	10-14 years	Caries of deciduous teeth	Rate	1990	5731.25	10572	1668.32
13	Prevalence	Eastern Europe	Both	5-9 years	Caries of deciduous teeth	Rate	1990	43719.8	56935.3	32764.8
14	Prevalence	Eastern Europe	Both	5-9 years	Caries of deciduous teeth	Rate	2021	42723.2	55130.3	32530.8
15	Prevalence	Eastern Europe	Both	10-14 years	Caries of deciduous teeth	Rate	1990	6293.05	11334.6	1878.41
16	Prevalence	Central Sub-Saharan Africa	Both	5-9 years	Caries of deciduous teeth	Rate	1990	38884.9	51274.2	28146.4
17	Prevalence	Central Sub-Saharan Africa	Both	5-9 years	Caries of deciduous teeth	Rate	2021	32874.5	44928.1	21964.6
18	Prevalence	Central Sub-Saharan Africa	Both	10-14 years	Caries of deciduous teeth	Rate	1990	5565.84	10350.1	1557.58
19	Prevalence	South Asia	Both	5-9 years	Caries of deciduous teeth	Rate	1990	41345.8	53737.1	31277.9
20	Prevalence	South Asia	Both	5-9 years	Caries of deciduous teeth	Rate	2021	40501.2	50102	31750.8
21	Prevalence	South Asia	Both	10-14 years	Caries of deciduous teeth	Rate	1990	6019.86	11065.1	1800.57
22	Prevalence	Caribbean	Both	5-9 years	Caries of deciduous teeth	Rate	1990	42686.9	56032.5	31135.9
23	Prevalence	Caribbean	Both	5-9 years	Caries of deciduous teeth	Rate	2021	41255.9	51773.8	32161.3
24	Prevalence	Caribbean	Both	10-14 years	Caries of deciduous teeth	Rate	1990	5986.22	10941.8	1759.14
25	Prevalence	Southern Latin America	Both	10-14 years	Caries of deciduous teeth	Rate	2021	5719.02	10492.9	1614.95
26	Prevalence	Southern Latin America	Both	2-4 years	Caries of deciduous teeth	Rate	1990	50969.4	64064.4	36646.9
27	Prevalence	Southern Latin America	Both	2-4 years	Caries of deciduous teeth	Rate	2021	47391.5	60113.5	34046.4
28	Prevalence	High-income North America	Both	10-14 years	Caries of deciduous teeth	Rate	2021	4507.64	8150.82	1445.58
29	Prevalence	High-income North America	Both	2-4 years	Caries of deciduous teeth	Rate	1990	30752	43094	19165.3
30	Prevalence	High-income North America	Both	2-4 years	Caries of deciduous teeth	Rate	2021	39992.5	52617.5	27124.9
31	Prevalence	South Asia	Both	10-14 years	Caries of deciduous teeth	Rate	2021	4249.06	7332.92	1809.05
32	Prevalence	South Asia	Both	2-4 years	Caries of deciduous teeth	Rate	1990	58417.5	71617.4	41979.1
33	Prevalence	South Asia	Both	2-4 years	Caries of deciduous teeth	Rate	2021	53213.8	64535.1	41556.6
34	Prevalence	Central Sub-Saharan Africa	Both	10-14 years	Caries of deciduous teeth	Rate	2021	1523.35	3383.09	462.994
35	Prevalence	Central Sub-Saharan Africa	Both	2-4 years	Caries of deciduous teeth	Rate	1990	52607.2	67136.1	36792.1
36	Prevalence	Central Sub-Saharan Africa	Both	2-4 years	Caries of deciduous teeth	Rate	2021	41366.6	58656.4	26276
37	Prevalence	Caribbean	Both	10-14 years	Caries of deciduous teeth	Rate	2021	3240.27	5446.58	1467.72
38	Prevalence	Caribbean	Both	2-4 years	Caries of deciduous teeth	Rate	1990	58157.9	70348.4	42604.2
39	Prevalence	Caribbean	Both	2-4 years	Caries of deciduous teeth	Rate	2021	56074.4	65718.1	45122.4
40	Prevalence	Western Sub-Saharan Africa	Both	10-14 years	Caries of deciduous teeth	Rate	2021	4540.82	8011.9	1585.29
41	Prevalence	Western Sub-Saharan Africa	Both	2-4 years	Caries of deciduous teeth	Rate	1990	39426.7	52406	25892.3
42	Prevalence	Western Sub-Saharan Africa	Both	2-4 years	Caries of deciduous teeth	Rate	2021	46048.3	58484.1	32904.3
43	Prevalence	Tropical Latin America	Both	10-14 years	Caries of deciduous teeth	Rate	2021	6430.85	11645.3	1896.75
44	Prevalence	Tropical Latin America	Both	2-4 years	Caries of deciduous teeth	Rate	1990	46540.3	59251.8	32607.7
45	Prevalence	Tropical Latin America	Both	2-4 years	Caries of deciduous teeth	Rate	2021	48645.6	61535.1	33727.4
46	Prevalence	East Asia	Both	10-14 years	Caries of deciduous teeth	Rate	2021	5361.27	9627.24	1821.32
47	Prevalence	East Asia	Both	2-4 years	Caries of deciduous teeth	Rate	1990	62838.3	75509.6	47483.5
48	Prevalence	East Asia	Both	2-4 years	Caries of deciduous teeth	Rate	2021	60254.7	71442.3	46894.4
49	Prevalence	Southeast Asia	Both	5-9 years	Caries of deciduous teeth	Rate	1990	45438.2	58417.9	34561.4
50	Prevalence	Southeast Asia	Both	5-9 years	Caries of deciduous teeth	Rate	2021	44965.6	57136.4	34432.1
51	Prevalence	Southeast Asia	Both	10-14 years	Caries of deciduous teeth	Rate	1990	6160.57	11198.8	1774.52
52	Prevalence	Oceania	Both	10-14 years	Caries of deciduous teeth	Rate	2021	6008.68	11273.2	1744.51
53	Prevalence	Oceania	Both	2-4 years	Caries of deciduous teeth	Rate	1990	62648.2	74591.6	46540.4
54	Prevalence	Oceania	Both	2-4 years	Caries of deciduous teeth	Rate	2021	61582.2	73571.5	45360.7
55	Prevalence	East Asia	Both	5-9 years	Caries of deciduous teeth	Rate	1990	42891.2	55788	31305.1
56	Prevalence	East Asia	Both	5-9 years	Caries of deciduous teeth	Rate	2021	41069.7	51888.4	32228.6
57	Prevalence	East Asia	Both	10-14 years	Caries of deciduous teeth	Rate	1990	5921.88	10746.8	1842.08
58	Prevalence	Global	Both	10-14 years	Caries of deciduous teeth	Rate	2021	4592.45	7990.86	1862.11
59	Prevalence	Global	Both	2-4 years	Caries of deciduous teeth	Rate	1990	54502	66151	40167.2
60	Prevalence	Global	Both	2-4 years	Caries of deciduous teeth	Rate	2021	51568.5	61973.3	40017.5
61	Prevalence	Southern Sub-Saharan Africa	Both	10-14 years	Caries of deciduous teeth	Rate	2021	5258.64	9754.66	1592.27
62	Prevalence	Southern Sub-Saharan Africa	Both	2-4 years	Caries of deciduous teeth	Rate	1990	40208	54462.6	25942.5
63	Prevalence	Southern Sub-Saharan Africa	Both	2-4 years	Caries of deciduous teeth	Rate	2021	46252.2	59972.3	31858.5
64	Prevalence	Eastern Sub-Saharan Africa	Both	10-14 years	Caries of deciduous teeth	Rate	2021	3924.6	6969.73	1594.21
65	Prevalence	Eastern Sub-Saharan Africa	Both	2-4 years	Caries of deciduous teeth	Rate	1990	53297.1	65331	39139.9
66	Prevalence	Eastern Sub-Saharan Africa	Both	2-4 years	Caries of deciduous teeth	Rate	2021	48343.4	59757	36372.5
67	Prevalence	Central Latin America	Both	10-14 years	Caries of deciduous teeth	Rate	2021	4144.58	7387.72	1635.71
68	Prevalence	Central Latin America	Both	2-4 years	Caries of deciduous teeth	Rate	1990	43843.7	57907.6	28680.4
69	Prevalence	Central Latin America	Both	2-4 years	Caries of deciduous teeth	Rate	2021	47771.4	58192.7	36420.5
70	Prevalence	North Africa and Middle East	Both	10-14 years	Caries of deciduous teeth	Rate	2021	2995.93	5093.39	1367.19
71	Prevalence	North Africa and Middle East	Both	2-4 years	Caries of deciduous teeth	Rate	1990	49668.2	62602.5	35252.2
72	Prevalence	North Africa and Middle East	Both	2-4 years	Caries of deciduous teeth	Rate	2021	51422.6	63577.1	39087
73	Prevalence	Tropical Latin America	Both	5-9 years	Caries of deciduous teeth	Rate	1990	39102.4	51531.8	28148.7
74	Prevalence	Tropical Latin America	Both	5-9 years	Caries of deciduous teeth	Rate	2021	39782	51729.4	29248.4
75	Prevalence	Tropical Latin America	Both	10-14 years	Caries of deciduous teeth	Rate	1990	5477.28	10057	1533.49
76	Prevalence	North Africa and Middle East	Both	5-9 years	Caries of deciduous teeth	Rate	1990	43248.7	55766.7	32098
77	Prevalence	North Africa and Middle East	Both	5-9 years	Caries of deciduous teeth	Rate	2021	40799.3	51603.1	31821.2
78	Prevalence	North Africa and Middle East	Both	10-14 years	Caries of deciduous teeth	Rate	1990	6352.32	11189.6	2183.92
79	Prevalence	Eastern Sub-Saharan Africa	Both	5-9 years	Caries of deciduous teeth	Rate	1990	41938.9	53613	32332.7
80	Prevalence	Eastern Sub-Saharan Africa	Both	5-9 years	Caries of deciduous teeth	Rate	2021	37935.8	46860.5	29559.1
81	Prevalence	Eastern Sub-Saharan Africa	Both	10-14 years	Caries of deciduous teeth	Rate	1990	6073.16	10451.6	2408.06
82	Prevalence	Southern Latin America	Both	5-9 years	Caries of deciduous teeth	Rate	1990	46595.8	55357.9	37854.9
83	Prevalence	Southern Latin America	Both	5-9 years	Caries of deciduous teeth	Rate	2021	40454.6	54023.4	29104.2
84	Prevalence	Southern Latin America	Both	10-14 years	Caries of deciduous teeth	Rate	1990	6130.03	11075.2	1986.52
85	Prevalence	Western Sub-Saharan Africa	Both	5-9 years	Caries of deciduous teeth	Rate	1990	37758.9	50044.5	27235.3
86	Prevalence	Western Sub-Saharan Africa	Both	5-9 years	Caries of deciduous teeth	Rate	2021	37574.7	47656.7	29299.2
87	Prevalence	Western Sub-Saharan Africa	Both	10-14 years	Caries of deciduous teeth	Rate	1990	5885.88	10357.6	2044.51
88	Prevalence	Southern Sub-Saharan Africa	Both	5-9 years	Caries of deciduous teeth	Rate	1990	35407	47781.5	25967
89	Prevalence	Southern Sub-Saharan Africa	Both	5-9 years	Caries of deciduous teeth	Rate	2021	37147.2	49112.8	27342.9
90	Prevalence	Southern Sub-Saharan Africa	Both	10-14 years	Caries of deciduous teeth	Rate	1990	5487.31	10095.2	1549.23
91	Prevalence	Oceania	Both	5-9 years	Caries of deciduous teeth	Rate	1990	46257	60762.6	33933.9
92	Prevalence	Oceania	Both	5-9 years	Caries of deciduous teeth	Rate	2021	45597.6	60205.1	34057.1
93	Prevalence	Oceania	Both	10-14 years	Caries of deciduous teeth	Rate	1990	6032.47	11121	1686.61
94	Prevalence	Global	Both	5-9 years	Caries of deciduous teeth	Rate	1990	41641.5	53697.3	31536.2
95	Prevalence	Global	Both	5-9 years	Caries of deciduous teeth	Rate	2021	39735.1	48980.1	31639.6
96	Prevalence	Global	Both	10-14 years	Caries of deciduous teeth	Rate	1990	6080.48	10679.5	2008.62
97	Prevalence	Central Asia	Both	5-9 years	Caries of deciduous teeth	Rate	1990	43432.5	56617	32267.8
98	Prevalence	Central Asia	Both	5-9 years	Caries of deciduous teeth	Rate	2021	43640.1	57867.7	32512
99	Prevalence	Central Asia	Both	10-14 years	Caries of deciduous teeth	Rate	1990	6046.78	10885	1792.91
100	Prevalence	Central Asia	Both	10-14 years	Caries of deciduous teeth	Rate	2021	6075.46	11228.4	1757.29
101	Prevalence	Central Asia	Both	2-4 years	Caries of deciduous teeth	Rate	1990	64800.3	76469.4	49186.8
102	Prevalence	Central Asia	Both	2-4 years	Caries of deciduous teeth	Rate	2021	64587.5	76188.9	49476
103	Prevalence	Central Europe	Both	5-9 years	Caries of deciduous teeth	Rate	1990	48974.1	60359.9	39277.4
104	Prevalence	Central Europe	Both	5-9 years	Caries of deciduous teeth	Rate	2021	42199.2	54797.5	31643.4
105	Prevalence	Central Europe	Both	10-14 years	Caries of deciduous teeth	Rate	1990	8322.91	12954.8	4273.19
106	Prevalence	High-income North America	Both	5-9 years	Caries of deciduous teeth	Rate	1990	28618.3	38577.5	19624
107	Prevalence	High-income North America	Both	5-9 years	Caries of deciduous teeth	Rate	2021	33735	42712.1	25574.2
108	Prevalence	High-income North America	Both	10-14 years	Caries of deciduous teeth	Rate	1990	4951.48	9308.39	1180.92
109	Prevalence	Central Europe	Both	10-14 years	Caries of deciduous teeth	Rate	2021	6140.64	11109.7	1812.55
110	Prevalence	Central Europe	Both	2-4 years	Caries of deciduous teeth	Rate	1990	68101.8	78288.3	54917.5
111	Prevalence	Central Europe	Both	2-4 years	Caries of deciduous teeth	Rate	2021	65391.6	76086.4	51719.1
112	Prevalence	High-income Asia Pacific	Both	10-14 years	Caries of deciduous teeth	Rate	2021	4723.13	7926.78	2200.13
113	Prevalence	High-income Asia Pacific	Both	2-4 years	Caries of deciduous teeth	Rate	1990	56487.1	66913.8	44103.5
114	Prevalence	High-income Asia Pacific	Both	2-4 years	Caries of deciduous teeth	Rate	2021	43522.1	53334.2	33447.4
115	Prevalence	Eastern Europe	Both	10-14 years	Caries of deciduous teeth	Rate	2021	5916.57	10616.2	1831
116	Prevalence	Eastern Europe	Both	2-4 years	Caries of deciduous teeth	Rate	1990	63663.2	76429.2	48105.9
117	Prevalence	Eastern Europe	Both	2-4 years	Caries of deciduous teeth	Rate	2021	64965.7	76076.9	50162.9
118	Prevalence	Western Europe	Both	10-14 years	Caries of deciduous teeth	Rate	2021	4536.99	8223.37	1386.96
119	Prevalence	Western Europe	Both	2-4 years	Caries of deciduous teeth	Rate	1990	22869	31265.4	14881.8
120	Prevalence	Western Europe	Both	2-4 years	Caries of deciduous teeth	Rate	2021	22569.2	29701.2	15510.6
121	Prevalence	Australasia	Both	10-14 years	Caries of deciduous teeth	Rate	2021	14081.3	17712.7	10649.3
122	Prevalence	Australasia	Both	2-4 years	Caries of deciduous teeth	Rate	1990	20538.5	25830.5	15671.6
123	Prevalence	Australasia	Both	2-4 years	Caries of deciduous teeth	Rate	2021	21640.5	30216.8	14509.8
124	Prevalence	High-income Asia Pacific	Both	5-9 years	Caries of deciduous teeth	Rate	1990	46283.3	56866.4	37351.3
125	Prevalence	High-income Asia Pacific	Both	5-9 years	Caries of deciduous teeth	Rate	2021	35582	43360.5	28360.5
126	Prevalence	High-income Asia Pacific	Both	10-14 years	Caries of deciduous teeth	Rate	1990	5777.34	10089	2158.27
