# Supplementary material for: Global, Regional, and National Levels and Trends in Burden of Dental Caries and Periodontal Disease from 1990 to 2035：Result From the Global Burden of Disease Study 2021
Source: Research Square preprint supplement (doi:10.21203/rs.3.rs-5609270/v1), 2025-04-02
Supplement: Supplementary file 25 [file dac3d4992e51aaab84ca5ff8.xlsx]

## Sheet: Sheet1
Exported data
	measure_name	location_name	sex_name	age_name	cause_name	metric_name	year	val	upper	lower
1	Incidence	Southeast Asia	Both	5-9 years	Caries of deciduous teeth	Rate	1990	125557	162015	85933.6
2	Incidence	Southeast Asia	Both	5-9 years	Caries of deciduous teeth	Rate	2021	126803	162398	88536.8
3	Incidence	Southeast Asia	Both	10-14 years	Caries of deciduous teeth	Rate	1990	36420	110132	5256.93
4	Incidence	Southeast Asia	Both	10-14 years	Caries of deciduous teeth	Rate	2021	37145.6	107906	6613.96
5	Incidence	Southeast Asia	Both	2-4 years	Caries of deciduous teeth	Rate	1990	65944	88435.7	44031.9
6	Incidence	Southeast Asia	Both	2-4 years	Caries of deciduous teeth	Rate	2021	66423.5	89014.4	44599.5
7	Incidence	Global	Both	5-9 years	Caries of deciduous teeth	Rate	1990	122094	156831	84281.6
8	Incidence	Global	Both	5-9 years	Caries of deciduous teeth	Rate	2021	116346	144635	85293.9
9	Incidence	Global	Both	10-14 years	Caries of deciduous teeth	Rate	1990	36084	100595	8081.33
10	Incidence	Global	Both	10-14 years	Caries of deciduous teeth	Rate	2021	25238.3	69794.5	5536.23
11	Incidence	Global	Both	2-4 years	Caries of deciduous teeth	Rate	1990	59175.9	83275.5	37845.2
12	Incidence	Global	Both	2-4 years	Caries of deciduous teeth	Rate	2021	62840.9	80481	44963
13	Incidence	Central Europe	Both	5-9 years	Caries of deciduous teeth	Rate	1990	116376	149471	80928.1
14	Incidence	Central Europe	Both	5-9 years	Caries of deciduous teeth	Rate	2021	125693	160174	87743.8
15	Incidence	Central Europe	Both	10-14 years	Caries of deciduous teeth	Rate	1990	64289.5	126024	35730.5
16	Incidence	Central Europe	Both	10-14 years	Caries of deciduous teeth	Rate	2021	36456	109593	5504.83
17	Incidence	Central Europe	Both	2-4 years	Caries of deciduous teeth	Rate	1990	64271.9	85842	42735.2
18	Incidence	East Asia	Both	5-9 years	Caries of deciduous teeth	Rate	1990	120501	155332	79866.1
19	Incidence	East Asia	Both	5-9 years	Caries of deciduous teeth	Rate	2021	126658	160145	89218.6
20	Incidence	East Asia	Both	10-14 years	Caries of deciduous teeth	Rate	1990	34534.4	105488	5221.3
21	Incidence	East Asia	Both	10-14 years	Caries of deciduous teeth	Rate	2021	30719.8	92129.8	5330.04
22	Incidence	East Asia	Both	2-4 years	Caries of deciduous teeth	Rate	1990	59742.1	82327	38634.8
23	Incidence	Central Europe	Both	2-4 years	Caries of deciduous teeth	Rate	2021	65517.9	87179.6	44597.6
24	Incidence	Oceania	Both	5-9 years	Caries of deciduous teeth	Rate	1990	126475	165894	85023.2
25	Incidence	Oceania	Both	5-9 years	Caries of deciduous teeth	Rate	2021	128111	167923	85304.2
26	Incidence	Oceania	Both	10-14 years	Caries of deciduous teeth	Rate	1990	34592.2	108461	4765.84
27	Incidence	Oceania	Both	10-14 years	Caries of deciduous teeth	Rate	2021	34070.1	102771	5031.5
28	Incidence	Oceania	Both	2-4 years	Caries of deciduous teeth	Rate	1990	66106.5	88247.5	42479.5
29	Incidence	East Asia	Both	2-4 years	Caries of deciduous teeth	Rate	2021	61505.7	83107	42092.5
30	Incidence	Oceania	Both	2-4 years	Caries of deciduous teeth	Rate	2021	66262.4	89282.3	42650.2
31	Incidence	Central Asia	Both	5-9 years	Caries of deciduous teeth	Rate	1990	130962	168863	90602.9
32	Incidence	Central Asia	Both	5-9 years	Caries of deciduous teeth	Rate	2021	130572	168999	91551.3
33	Incidence	Central Asia	Both	10-14 years	Caries of deciduous teeth	Rate	1990	35241.1	107260	5201.39
34	Incidence	Central Asia	Both	10-14 years	Caries of deciduous teeth	Rate	2021	35615.4	108704	5102.67
35	Incidence	Central Asia	Both	2-4 years	Caries of deciduous teeth	Rate	1990	66461.6	89345.6	43147.8
36	Incidence	Central Asia	Both	2-4 years	Caries of deciduous teeth	Rate	2021	66847.6	89818.7	43038.7
37	Incidence	Western Europe	Both	5-9 years	Caries of deciduous teeth	Rate	1990	87415.6	115036	60884.9
38	Incidence	Western Europe	Both	5-9 years	Caries of deciduous teeth	Rate	2021	99506.6	128936	70996.9
39	Incidence	Western Europe	Both	10-14 years	Caries of deciduous teeth	Rate	1990	48124.8	87249.2	26812.3
40	Incidence	Western Europe	Both	10-14 years	Caries of deciduous teeth	Rate	2021	22242.8	55249.6	3718.31
41	Incidence	Western Europe	Both	2-4 years	Caries of deciduous teeth	Rate	1990	33849.3	53145.5	19469.4
42	Incidence	Western Europe	Both	2-4 years	Caries of deciduous teeth	Rate	2021	36779.3	55600.1	21897.2
43	Incidence	Eastern Europe	Both	5-9 years	Caries of deciduous teeth	Rate	1990	131801	169557	91842
44	Incidence	Eastern Europe	Both	5-9 years	Caries of deciduous teeth	Rate	2021	131801	166385	93206.4
45	Incidence	Eastern Europe	Both	10-14 years	Caries of deciduous teeth	Rate	1990	38302.4	114681	5981.14
46	Incidence	Eastern Europe	Both	10-14 years	Caries of deciduous teeth	Rate	2021	35572.8	106040	5577.08
47	Incidence	Eastern Europe	Both	2-4 years	Caries of deciduous teeth	Rate	1990	61989.6	85803.5	40112.8
48	Incidence	Australasia	Both	5-9 years	Caries of deciduous teeth	Rate	1990	31837.9	40203.4	23353.5
49	Incidence	Australasia	Both	5-9 years	Caries of deciduous teeth	Rate	2021	74543.1	101639	50996.6
50	Incidence	Australasia	Both	10-14 years	Caries of deciduous teeth	Rate	1990	98577.1	114212	85042.4
51	Incidence	Australasia	Both	10-14 years	Caries of deciduous teeth	Rate	2021	116847	162169	59428.1
52	Incidence	Australasia	Both	2-4 years	Caries of deciduous teeth	Rate	1990	23037.5	32516.6	14650.7
53	Incidence	Eastern Europe	Both	2-4 years	Caries of deciduous teeth	Rate	2021	63537.8	84107.8	43176.6
54	Incidence	High-income Asia Pacific	Both	5-9 years	Caries of deciduous teeth	Rate	1990	120738	153303	87499.8
55	Incidence	High-income Asia Pacific	Both	5-9 years	Caries of deciduous teeth	Rate	2021	121306	152035	93014.2
56	Incidence	High-income Asia Pacific	Both	10-14 years	Caries of deciduous teeth	Rate	1990	30177	85206.3	5895.39
57	Incidence	High-income Asia Pacific	Both	10-14 years	Caries of deciduous teeth	Rate	2021	23406.7	60337	5561.95
58	Incidence	High-income Asia Pacific	Both	2-4 years	Caries of deciduous teeth	Rate	1990	67604.4	88399.6	47855.2
59	Incidence	Australasia	Both	2-4 years	Caries of deciduous teeth	Rate	2021	39429.2	60707.2	21568.8
60	Incidence	High-income Asia Pacific	Both	2-4 years	Caries of deciduous teeth	Rate	2021	60613.7	79255.5	42729.5
61	Incidence	High-income North America	Both	5-9 years	Caries of deciduous teeth	Rate	1990	103268	142344	64683.9
62	Incidence	High-income North America	Both	5-9 years	Caries of deciduous teeth	Rate	2021	115723	147188	80911.7
63	Incidence	High-income North America	Both	10-14 years	Caries of deciduous teeth	Rate	1990	24815.1	62691.7	3047.02
64	Incidence	High-income North America	Both	10-14 years	Caries of deciduous teeth	Rate	2021	22011.3	53245.9	3816.2
65	Incidence	High-income North America	Both	2-4 years	Caries of deciduous teeth	Rate	1990	50953.4	81244.3	26664.4
66	Incidence	High-income North America	Both	2-4 years	Caries of deciduous teeth	Rate	2021	62194.6	89426.3	38498.9
67	Incidence	Caribbean	Both	5-9 years	Caries of deciduous teeth	Rate	1990	127011	163507	86948.1
68	Incidence	Caribbean	Both	5-9 years	Caries of deciduous teeth	Rate	2021	114564	145691	80099.8
69	Incidence	Caribbean	Both	10-14 years	Caries of deciduous teeth	Rate	1990	33807.2	104275	4785.08
70	Incidence	Caribbean	Both	10-14 years	Caries of deciduous teeth	Rate	2021	16124.7	40145.8	3565.74
71	Incidence	Caribbean	Both	2-4 years	Caries of deciduous teeth	Rate	1990	68360.4	92674.1	43091.1
72	Incidence	Caribbean	Both	2-4 years	Caries of deciduous teeth	Rate	2021	75803.3	92459.9	58638.2
73	Incidence	Southern Latin America	Both	5-9 years	Caries of deciduous teeth	Rate	1990	111753	146331	74447.5
74	Incidence	Southern Latin America	Both	5-9 years	Caries of deciduous teeth	Rate	2021	123661	159016	81253.8
75	Incidence	Southern Latin America	Both	10-14 years	Caries of deciduous teeth	Rate	1990	32117	98551.1	4592.54
76	Incidence	Southern Latin America	Both	10-14 years	Caries of deciduous teeth	Rate	2021	31065.7	90347.2	4578.71
77	Incidence	Southern Latin America	Both	2-4 years	Caries of deciduous teeth	Rate	1990	64121.6	91518.2	40279.7
78	Incidence	Southern Latin America	Both	2-4 years	Caries of deciduous teeth	Rate	2021	64278.1	91132.2	40004
79	Incidence	Central Latin America	Both	5-9 years	Caries of deciduous teeth	Rate	1990	127654	165154	85694.3
80	Incidence	Central Latin America	Both	5-9 years	Caries of deciduous teeth	Rate	2021	118104	147408	87062.6
81	Incidence	Central Latin America	Both	10-14 years	Caries of deciduous teeth	Rate	1990	31583.5	97054.9	4571.5
82	Incidence	Central Latin America	Both	10-14 years	Caries of deciduous teeth	Rate	2021	19379.5	52517.2	4180.67
83	Incidence	Central Latin America	Both	2-4 years	Caries of deciduous teeth	Rate	1990	56808	86261.2	32114.4
84	Incidence	Central Latin America	Both	2-4 years	Caries of deciduous teeth	Rate	2021	66683.1	85868.1	47649.6
85	Incidence	Tropical Latin America	Both	5-9 years	Caries of deciduous teeth	Rate	1990	123229	159310	82211.9
86	Incidence	Tropical Latin America	Both	5-9 years	Caries of deciduous teeth	Rate	2021	131321	169324	89499.1
87	Incidence	Tropical Latin America	Both	10-14 years	Caries of deciduous teeth	Rate	1990	29010.3	82432.9	4095.35
88	Incidence	Tropical Latin America	Both	10-14 years	Caries of deciduous teeth	Rate	2021	41876.5	120878	6455.07
89	Incidence	Tropical Latin America	Both	2-4 years	Caries of deciduous teeth	Rate	1990	60876.4	88083.1	38409.8
90	Incidence	Tropical Latin America	Both	2-4 years	Caries of deciduous teeth	Rate	2021	51911.1	80219.7	30238
91	Incidence	North Africa and Middle East	Both	5-9 years	Caries of deciduous teeth	Rate	1990	123085	159428	82979.2
92	Incidence	North Africa and Middle East	Both	5-9 years	Caries of deciduous teeth	Rate	2021	107834	139461	74347.6
93	Incidence	North Africa and Middle East	Both	10-14 years	Caries of deciduous teeth	Rate	1990	38630.8	106900	11127.2
94	Incidence	North Africa and Middle East	Both	10-14 years	Caries of deciduous teeth	Rate	2021	14880.4	37516	3701.77
95	Incidence	North Africa and Middle East	Both	2-4 years	Caries of deciduous teeth	Rate	1990	58975.9	84905.7	36341.2
96	Incidence	North Africa and Middle East	Both	2-4 years	Caries of deciduous teeth	Rate	2021	67283.5	86214.6	47809.1
97	Incidence	South Asia	Both	5-9 years	Caries of deciduous teeth	Rate	1990	129431	165410	87126.7
98	Incidence	South Asia	Both	5-9 years	Caries of deciduous teeth	Rate	2021	114678	144163	84193.4
99	Incidence	South Asia	Both	10-14 years	Caries of deciduous teeth	Rate	1990	35614.6	108259	5420.71
100	Incidence	South Asia	Both	10-14 years	Caries of deciduous teeth	Rate	2021	24008.8	64765.7	5061.96
101	Incidence	South Asia	Both	2-4 years	Caries of deciduous teeth	Rate	1990	59057.6	85166.4	38138.3
102	Incidence	South Asia	Both	2-4 years	Caries of deciduous teeth	Rate	2021	60825	78095.6	43968.9
103	Incidence	Central Sub-Saharan Africa	Both	5-9 years	Caries of deciduous teeth	Rate	1990	126504	163079	84551.4
104	Incidence	Central Sub-Saharan Africa	Both	5-9 years	Caries of deciduous teeth	Rate	2021	91817.7	134847	53009.6
105	Incidence	Central Sub-Saharan Africa	Both	10-14 years	Caries of deciduous teeth	Rate	1990	29526.1	85738.8	4324.97
106	Incidence	Central Sub-Saharan Africa	Both	10-14 years	Caries of deciduous teeth	Rate	2021	5569.13	20320.2	934.375
107	Incidence	Central Sub-Saharan Africa	Both	2-4 years	Caries of deciduous teeth	Rate	1990	66008.3	94256	40287.3
108	Incidence	Central Sub-Saharan Africa	Both	2-4 years	Caries of deciduous teeth	Rate	2021	68469.3	96986.3	40390.8
109	Incidence	Southern Sub-Saharan Africa	Both	5-9 years	Caries of deciduous teeth	Rate	1990	119536	157845	79705.6
110	Incidence	Southern Sub-Saharan Africa	Both	5-9 years	Caries of deciduous teeth	Rate	2021	122107	154718	86471.3
111	Incidence	Southern Sub-Saharan Africa	Both	10-14 years	Caries of deciduous teeth	Rate	1990	28644.3	81745.1	4154.73
112	Incidence	Southern Sub-Saharan Africa	Both	10-14 years	Caries of deciduous teeth	Rate	2021	25842.4	69634.6	4405.7
113	Incidence	Southern Sub-Saharan Africa	Both	2-4 years	Caries of deciduous teeth	Rate	1990	55366.5	85793.8	31318.5
114	Incidence	Southern Sub-Saharan Africa	Both	2-4 years	Caries of deciduous teeth	Rate	2021	63536.6	89119.4	40077.1
115	Incidence	Eastern Sub-Saharan Africa	Both	5-9 years	Caries of deciduous teeth	Rate	1990	117247	150395	79473
116	Incidence	Eastern Sub-Saharan Africa	Both	5-9 years	Caries of deciduous teeth	Rate	2021	110050	138531	79469.5
117	Incidence	Eastern Sub-Saharan Africa	Both	10-14 years	Caries of deciduous teeth	Rate	1990	38624.9	94648.7	14079.4
118	Incidence	Eastern Sub-Saharan Africa	Both	10-14 years	Caries of deciduous teeth	Rate	2021	20590.5	57587.6	4239.16
119	Incidence	Eastern Sub-Saharan Africa	Both	2-4 years	Caries of deciduous teeth	Rate	1990	61025.9	85831.1	38628.1
120	Incidence	Eastern Sub-Saharan Africa	Both	2-4 years	Caries of deciduous teeth	Rate	2021	66833.8	85703.1	47413
121	Incidence	Western Sub-Saharan Africa	Both	5-9 years	Caries of deciduous teeth	Rate	1990	122910	159422	83404.7
122	Incidence	Western Sub-Saharan Africa	Both	5-9 years	Caries of deciduous teeth	Rate	2021	112013	141780	80179.7
123	Incidence	Western Sub-Saharan Africa	Both	10-14 years	Caries of deciduous teeth	Rate	1990	35366.9	84592.4	11335.3
124	Incidence	Western Sub-Saharan Africa	Both	10-14 years	Caries of deciduous teeth	Rate	2021	21991.2	56347.8	4430.57
125	Incidence	Western Sub-Saharan Africa	Both	2-4 years	Caries of deciduous teeth	Rate	1990	56394.2	85265.6	31600.1
126	Incidence	Western Sub-Saharan Africa	Both	2-4 years	Caries of deciduous teeth	Rate	2021	64743.8	87581.2	44333.3
