# Supplementary material for: Global, Regional, and National Levels and Trends in Burden of Dental Caries and Periodontal Disease from 1990 to 2035：Result From the Global Burden of Disease Study 2021
Source: Research Square preprint supplement (doi:10.21203/rs.3.rs-5609270/v1), 2025-04-02
Supplement: Supplementary file 26 [file e7433439c7b8e510e3f55c5a.xlsx]

## Sheet: Sheet1
Exported data
	measure_name	location_name	sex_name	age_name	cause_name	metric_name	year	val	upper	lower
1	Prevalence	Global	Male	20-24 years	Caries of permanent teeth	Number	2021	1.14403e+08	1.47216e+08	8.63668e+07
2	Prevalence	Global	Female	20-24 years	Caries of permanent teeth	Number	2021	1.12755e+08	1.45084e+08	8.47849e+07
3	Prevalence	Global	Male	20-24 years	Caries of permanent teeth	Percent	2021	0.391813	0.501119	0.297358
4	Prevalence	Global	Female	20-24 years	Caries of permanent teeth	Percent	2021	0.386623	0.496529	0.290873
5	Prevalence	Global	Male	20-24 years	Caries of permanent teeth	Rate	2021	37706.4	48521	28465.7
6	Prevalence	Global	Female	20-24 years	Caries of permanent teeth	Rate	2021	38384.5	49390.1	28862.7
7	Prevalence	Global	Male	65-69 years	Caries of permanent teeth	Number	2021	4.22069e+07	5.20182e+07	3.20994e+07
8	Prevalence	Global	Female	65-69 years	Caries of permanent teeth	Number	2021	4.72562e+07	5.82057e+07	3.58864e+07
9	Prevalence	Global	Male	65-69 years	Caries of permanent teeth	Percent	2021	0.320253	0.39468	0.243575
10	Prevalence	Global	Female	65-69 years	Caries of permanent teeth	Percent	2021	0.328207	0.404267	0.249246
11	Prevalence	Global	Male	65-69 years	Caries of permanent teeth	Rate	2021	32015.4	39457.6	24348.5
12	Prevalence	Global	Female	65-69 years	Caries of permanent teeth	Rate	2021	32814.8	40418.2	24919.6
13	Prevalence	Global	Male	70+ years	Caries of permanent teeth	Number	2021	6.2811e+07	7.57379e+07	5.01643e+07
14	Prevalence	Global	Female	70+ years	Caries of permanent teeth	Number	2021	7.92793e+07	9.51057e+07	6.3113e+07
15	Prevalence	Global	Male	70+ years	Caries of permanent teeth	Percent	2021	0.288911	0.34836	0.23074
16	Prevalence	Global	Female	70+ years	Caries of permanent teeth	Percent	2021	0.286278	0.343426	0.227899
17	Prevalence	Global	Male	70+ years	Caries of permanent teeth	Rate	2021	28888.8	34834.3	23072.2
18	Prevalence	Global	Female	70+ years	Caries of permanent teeth	Rate	2021	28626.4	34341	22789
19	Prevalence	Global	Male	5-9 years	Caries of permanent teeth	Number	2021	2.78277e+07	4.63796e+07	1.38152e+07
20	Prevalence	Global	Female	5-9 years	Caries of permanent teeth	Number	2021	2.75522e+07	4.58508e+07	1.39023e+07
21	Prevalence	Global	Male	5-9 years	Caries of permanent teeth	Percent	2021	0.088543	0.145994	0.043983
22	Prevalence	Global	Female	5-9 years	Caries of permanent teeth	Percent	2021	0.090566	0.149629	0.0457812
23	Prevalence	Global	Male	5-9 years	Caries of permanent teeth	Rate	2021	7850.38	13084	3897.35
24	Prevalence	Global	Female	5-9 years	Caries of permanent teeth	Rate	2021	8284.45	13786.5	4180.18
25	Prevalence	Global	Male	10-14 years	Caries of permanent teeth	Number	2021	8.11143e+07	1.15972e+08	5.28709e+07
26	Prevalence	Global	Female	10-14 years	Caries of permanent teeth	Number	2021	7.88075e+07	1.12056e+08	5.12619e+07
27	Prevalence	Global	Male	10-14 years	Caries of permanent teeth	Percent	2021	0.261436	0.36813	0.173344
28	Prevalence	Global	Female	10-14 years	Caries of permanent teeth	Percent	2021	0.257005	0.363285	0.169296
29	Prevalence	Global	Male	10-14 years	Caries of permanent teeth	Rate	2021	23599.6	33741.4	15382.4
30	Prevalence	Global	Female	10-14 years	Caries of permanent teeth	Rate	2021	24404.2	34700.3	15874.2
31	Prevalence	Global	Male	15-19 years	Caries of permanent teeth	Number	2021	9.71025e+07	1.33163e+08	6.73886e+07
32	Prevalence	Global	Female	15-19 years	Caries of permanent teeth	Number	2021	9.45733e+07	1.28797e+08	6.56109e+07
33	Prevalence	Global	Male	15-19 years	Caries of permanent teeth	Percent	2021	0.321394	0.437509	0.224079
34	Prevalence	Global	Female	15-19 years	Caries of permanent teeth	Percent	2021	0.316776	0.430182	0.220339
35	Prevalence	Global	Male	15-19 years	Caries of permanent teeth	Rate	2021	30313.3	41570.5	21037.3
36	Prevalence	Global	Female	15-19 years	Caries of permanent teeth	Rate	2021	31145.5	42416.3	21607.4
37	Prevalence	Global	Male	25-29 years	Caries of permanent teeth	Number	2021	1.11752e+08	1.57148e+08	8.20356e+07
38	Prevalence	Global	Female	25-29 years	Caries of permanent teeth	Number	2021	1.10892e+08	1.55878e+08	8.09293e+07
39	Prevalence	Global	Male	25-29 years	Caries of permanent teeth	Percent	2021	0.385194	0.538149	0.283827
40	Prevalence	Global	Female	25-29 years	Caries of permanent teeth	Percent	2021	0.3826	0.537591	0.279247
41	Prevalence	Global	Male	25-29 years	Caries of permanent teeth	Rate	2021	37581.8	52848.4	27588.4
42	Prevalence	Global	Female	25-29 years	Caries of permanent teeth	Rate	2021	38108.8	53568.5	27812
43	Prevalence	Global	Male	30-34 years	Caries of permanent teeth	Number	2021	1.06808e+08	1.46809e+08	7.88333e+07
44	Prevalence	Global	Female	30-34 years	Caries of permanent teeth	Number	2021	1.05929e+08	1.45779e+08	7.84874e+07
45	Prevalence	Global	Male	30-34 years	Caries of permanent teeth	Percent	2021	0.355644	0.488562	0.263165
46	Prevalence	Global	Female	30-34 years	Caries of permanent teeth	Percent	2021	0.355232	0.488815	0.263277
47	Prevalence	Global	Male	30-34 years	Caries of permanent teeth	Rate	2021	34955.9	48047.5	25800.5
48	Prevalence	Global	Female	30-34 years	Caries of permanent teeth	Rate	2021	35435.8	48766.7	26256
49	Prevalence	Global	Male	35-39 years	Caries of permanent teeth	Number	2021	1.02205e+08	1.37319e+08	6.98791e+07
50	Prevalence	Global	Female	35-39 years	Caries of permanent teeth	Number	2021	1.01065e+08	1.35735e+08	6.88281e+07
51	Prevalence	Global	Male	35-39 years	Caries of permanent teeth	Percent	2021	0.36538	0.490211	0.250082
52	Prevalence	Global	Female	35-39 years	Caries of permanent teeth	Percent	2021	0.364281	0.489192	0.248116
53	Prevalence	Global	Male	35-39 years	Caries of permanent teeth	Rate	2021	36106.7	48511.6	24686.7
54	Prevalence	Global	Female	35-39 years	Caries of permanent teeth	Rate	2021	36380.1	48860.3	24775.9
55	Prevalence	Global	Male	40-44 years	Caries of permanent teeth	Number	2021	9.18082e+07	1.23417e+08	6.26964e+07
56	Prevalence	Global	Female	40-44 years	Caries of permanent teeth	Number	2021	9.07034e+07	1.22143e+08	6.1894e+07
57	Prevalence	Global	Male	40-44 years	Caries of permanent teeth	Percent	2021	0.366977	0.492497	0.251669
58	Prevalence	Global	Female	40-44 years	Caries of permanent teeth	Percent	2021	0.365916	0.492694	0.249788
59	Prevalence	Global	Male	40-44 years	Caries of permanent teeth	Rate	2021	36408.6	48943.8	24863.6
60	Prevalence	Global	Female	40-44 years	Caries of permanent teeth	Rate	2021	36560.7	49233.2	24948.2
61	Prevalence	Global	Male	45-49 years	Caries of permanent teeth	Number	2021	8.30066e+07	1.09498e+08	5.91837e+07
62	Prevalence	Global	Female	45-49 years	Caries of permanent teeth	Number	2021	8.30866e+07	1.09304e+08	5.87284e+07
63	Prevalence	Global	Male	45-49 years	Caries of permanent teeth	Percent	2021	0.350845	0.462376	0.250435
64	Prevalence	Global	Female	45-49 years	Caries of permanent teeth	Percent	2021	0.35291	0.46418	0.249475
65	Prevalence	Global	Male	45-49 years	Caries of permanent teeth	Rate	2021	34896.9	46034.4	24881.5
66	Prevalence	Global	Female	45-49 years	Caries of permanent teeth	Rate	2021	35259.6	46385.5	24922.7
67	Prevalence	Global	Male	50-54 years	Caries of permanent teeth	Number	2021	7.44379e+07	9.96626e+07	5.04852e+07
68	Prevalence	Global	Female	50-54 years	Caries of permanent teeth	Number	2021	7.6155e+07	1.01536e+08	5.1233e+07
69	Prevalence	Global	Male	50-54 years	Caries of permanent teeth	Percent	2021	0.336405	0.450482	0.228223
70	Prevalence	Global	Female	50-54 years	Caries of permanent teeth	Percent	2021	0.341894	0.455818	0.230007
71	Prevalence	Global	Male	50-54 years	Caries of permanent teeth	Rate	2021	33533.5	44897	22743.1
72	Prevalence	Global	Female	50-54 years	Caries of permanent teeth	Rate	2021	34159	45543.6	22980.4
73	Prevalence	Global	Male	55-59 years	Caries of permanent teeth	Number	2021	6.40785e+07	8.53962e+07	4.53102e+07
74	Prevalence	Global	Female	55-59 years	Caries of permanent teeth	Number	2021	6.76121e+07	8.96988e+07	4.79592e+07
75	Prevalence	Global	Male	55-59 years	Caries of permanent teeth	Percent	2021	0.329586	0.439172	0.233098
76	Prevalence	Global	Female	55-59 years	Caries of permanent teeth	Percent	2021	0.336584	0.446515	0.238816
77	Prevalence	Global	Male	55-59 years	Caries of permanent teeth	Rate	2021	32907.2	43854.9	23268.9
78	Prevalence	Global	Female	55-59 years	Caries of permanent teeth	Rate	2021	33637.3	44625.5	23859.9
79	Prevalence	Global	Male	60-64 years	Caries of permanent teeth	Number	2021	5.17208e+07	6.75884e+07	3.90229e+07
80	Prevalence	Global	Female	60-64 years	Caries of permanent teeth	Number	2021	5.59271e+07	7.34951e+07	4.21979e+07
81	Prevalence	Global	Male	60-64 years	Caries of permanent teeth	Percent	2021	0.332791	0.434764	0.251159
82	Prevalence	Global	Female	60-64 years	Caries of permanent teeth	Percent	2021	0.340092	0.446895	0.256632
83	Prevalence	Global	Male	60-64 years	Caries of permanent teeth	Rate	2021	33253.1	43454.9	25089.1
84	Prevalence	Global	Female	60-64 years	Caries of permanent teeth	Rate	2021	33996	44674.9	25650.5
