# Supplementary material for: Global, Regional, and National Levels and Trends in Burden of Dental Caries and Periodontal Disease from 1990 to 2035：Result From the Global Burden of Disease Study 2021
Source: Research Square preprint supplement (doi:10.21203/rs.3.rs-5609270/v1), 2025-04-02
Supplement: Supplementary file 27 [file ed7eb2aa1fa3d5c3e158603b.xlsx]

## Sheet: Sheet1
Exported data
	measure_name	location_name	sex_name	age_name	cause_name	metric_name	year	val	upper	lower
1	Prevalence	Global	Male	10-14 years	Caries of deciduous teeth	Number	2021	1.60116e+07	2.77068e+07	6.41067e+06
2	Prevalence	Global	Female	10-14 years	Caries of deciduous teeth	Number	2021	1.46033e+07	2.55593e+07	5.94933e+06
3	Prevalence	Global	Male	10-14 years	Caries of deciduous teeth	Percent	2021	0.0516382	0.089591	0.0207194
4	Prevalence	Global	Female	10-14 years	Caries of deciduous teeth	Percent	2021	0.0476443	0.0830094	0.0193594
5	Prevalence	Global	Male	10-14 years	Caries of deciduous teeth	Rate	2021	4658.47	8061.1	1865.14
6	Prevalence	Global	Female	10-14 years	Caries of deciduous teeth	Rate	2021	4522.18	7914.9	1842.32
7	Prevalence	Global	Male	2-4 years	Caries of deciduous teeth	Number	2021	1.08393e+08	1.29925e+08	8.42681e+07
8	Prevalence	Global	Female	2-4 years	Caries of deciduous teeth	Number	2021	9.94626e+07	1.19844e+08	7.71626e+07
9	Prevalence	Global	Male	2-4 years	Caries of deciduous teeth	Percent	2021	0.579197	0.678508	0.462099
10	Prevalence	Global	Female	2-4 years	Caries of deciduous teeth	Percent	2021	0.555509	0.65675	0.440323
11	Prevalence	Global	Male	2-4 years	Caries of deciduous teeth	Rate	2021	52060.2	62401.9	40473.2
12	Prevalence	Global	Female	2-4 years	Caries of deciduous teeth	Rate	2021	51043.2	61503	39599.1
13	Prevalence	Global	Male	5-9 years	Caries of deciduous teeth	Number	2021	1.40671e+08	1.74067e+08	1.11684e+08
14	Prevalence	Global	Female	5-9 years	Caries of deciduous teeth	Number	2021	1.32331e+08	1.62793e+08	1.05545e+08
15	Prevalence	Global	Male	5-9 years	Caries of deciduous teeth	Percent	2021	0.447641	0.543632	0.360565
16	Prevalence	Global	Female	5-9 years	Caries of deciduous teeth	Percent	2021	0.435035	0.529799	0.351402
17	Prevalence	Global	Male	5-9 years	Caries of deciduous teeth	Rate	2021	39684.1	49105.4	31506.6
18	Prevalence	Global	Female	5-9 years	Caries of deciduous teeth	Rate	2021	39789.5	48948.9	31735.6
