# Supplementary material for: Global, Regional, and National Levels and Trends in Burden of Dental Caries and Periodontal Disease from 1990 to 2035：Result From the Global Burden of Disease Study 2021
Source: Research Square preprint supplement (doi:10.21203/rs.3.rs-5609270/v1), 2025-04-02
Supplement: Supplementary file 28 [file fa642e244e94b185ddde8760.xlsx]

## Sheet: Sheet1
Exported data
	measure_name	location_name	sex_name	age_name	cause_name	metric_name	year	val	upper	lower
1	Incidence	Global	Male	20-24 years	Caries of permanent teeth	Number	2021	1.65309e+08	1.92962e+08	1.35086e+08
2	Incidence	Global	Female	20-24 years	Caries of permanent teeth	Number	2021	1.59103e+08	1.8655e+08	1.29039e+08
3	Incidence	Global	Male	20-24 years	Caries of permanent teeth	Percent	2021	0.125004	0.148232	0.102015
4	Incidence	Global	Female	20-24 years	Caries of permanent teeth	Percent	2021	0.112663	0.13376	0.0915135
5	Incidence	Global	Male	20-24 years	Caries of permanent teeth	Rate	2021	54484.4	63598.7	44523
6	Incidence	Global	Female	20-24 years	Caries of permanent teeth	Rate	2021	54162.4	63505.9	43927.8
7	Incidence	Global	Male	5-9 years	Caries of permanent teeth	Number	2021	5.63261e+07	9.99822e+07	2.79921e+07
8	Incidence	Global	Female	5-9 years	Caries of permanent teeth	Number	2021	5.50734e+07	9.73458e+07	2.76552e+07
9	Incidence	Global	Male	5-9 years	Caries of permanent teeth	Percent	2021	0.0274291	0.0477315	0.0139466
10	Incidence	Global	Female	5-9 years	Caries of permanent teeth	Percent	2021	0.0283111	0.0488329	0.0144627
11	Incidence	Global	Male	5-9 years	Caries of permanent teeth	Rate	2021	15890	28205.6	7896.76
12	Incidence	Global	Female	5-9 years	Caries of permanent teeth	Rate	2021	16559.6	29270.1	8315.41
13	Incidence	Global	Male	10-14 years	Caries of permanent teeth	Number	2021	1.20594e+08	1.64367e+08	8.19708e+07
14	Incidence	Global	Female	10-14 years	Caries of permanent teeth	Number	2021	1.14391e+08	1.55352e+08	7.78422e+07
15	Incidence	Global	Male	10-14 years	Caries of permanent teeth	Percent	2021	0.0732364	0.100902	0.0487333
16	Incidence	Global	Female	10-14 years	Caries of permanent teeth	Percent	2021	0.0706641	0.0971739	0.0471959
17	Incidence	Global	Male	10-14 years	Caries of permanent teeth	Rate	2021	35086	47821.4	23848.8
18	Incidence	Global	Female	10-14 years	Caries of permanent teeth	Rate	2021	35423.3	48107.8	24105.3
19	Incidence	Global	Male	15-19 years	Caries of permanent teeth	Number	2021	1.48349e+08	1.81965e+08	1.16269e+08
20	Incidence	Global	Female	15-19 years	Caries of permanent teeth	Number	2021	1.40062e+08	1.71947e+08	1.10417e+08
21	Incidence	Global	Male	15-19 years	Caries of permanent teeth	Percent	2021	0.106233	0.132723	0.0822929
22	Incidence	Global	Female	15-19 years	Caries of permanent teeth	Percent	2021	0.0985366	0.122998	0.0769829
23	Incidence	Global	Male	15-19 years	Caries of permanent teeth	Rate	2021	46311.4	56805.5	36296.7
24	Incidence	Global	Female	15-19 years	Caries of permanent teeth	Rate	2021	46126	56626.6	36363.2
25	Incidence	Global	Male	25-29 years	Caries of permanent teeth	Number	2021	1.44666e+08	1.75857e+08	1.11198e+08
26	Incidence	Global	Female	25-29 years	Caries of permanent teeth	Number	2021	1.41648e+08	1.7326e+08	1.08982e+08
27	Incidence	Global	Male	25-29 years	Caries of permanent teeth	Percent	2021	0.112629	0.137812	0.087235
28	Incidence	Global	Female	25-29 years	Caries of permanent teeth	Percent	2021	0.0998972	0.121825	0.0777328
29	Incidence	Global	Male	25-29 years	Caries of permanent teeth	Rate	2021	48650.6	59140.1	37395.6
30	Incidence	Global	Female	25-29 years	Caries of permanent teeth	Rate	2021	48678.5	59542.2	37452.7
31	Incidence	Global	Male	30-34 years	Caries of permanent teeth	Number	2021	1.27362e+08	1.51549e+08	9.85213e+07
32	Incidence	Global	Female	30-34 years	Caries of permanent teeth	Number	2021	1.25517e+08	1.50164e+08	9.78677e+07
33	Incidence	Global	Male	30-34 years	Caries of permanent teeth	Percent	2021	0.0995754	0.122154	0.0774589
34	Incidence	Global	Female	30-34 years	Caries of permanent teeth	Percent	2021	0.0881493	0.106979	0.0688421
35	Incidence	Global	Male	30-34 years	Caries of permanent teeth	Rate	2021	41682.9	49598.9	32244
36	Incidence	Global	Female	30-34 years	Caries of permanent teeth	Rate	2021	41988.5	50233.8	32739.2
37	Incidence	Global	Male	35-39 years	Caries of permanent teeth	Number	2021	1.03555e+08	1.25251e+08	7.99884e+07
38	Incidence	Global	Female	35-39 years	Caries of permanent teeth	Number	2021	1.0268e+08	1.24719e+08	7.96062e+07
39	Incidence	Global	Male	35-39 years	Caries of permanent teeth	Percent	2021	0.0881866	0.108463	0.0667407
40	Incidence	Global	Female	35-39 years	Caries of permanent teeth	Percent	2021	0.0779959	0.0951871	0.0592851
41	Incidence	Global	Male	35-39 years	Caries of permanent teeth	Rate	2021	36583.6	44248.4	28258.1
42	Incidence	Global	Female	35-39 years	Caries of permanent teeth	Rate	2021	36961.6	44894.8	28655.7
43	Incidence	Global	Male	40-44 years	Caries of permanent teeth	Number	2021	8.17137e+07	1.03579e+08	6.3025e+07
44	Incidence	Global	Female	40-44 years	Caries of permanent teeth	Number	2021	8.13429e+07	1.03324e+08	6.24582e+07
45	Incidence	Global	Male	40-44 years	Caries of permanent teeth	Percent	2021	0.079251	0.101758	0.0615716
46	Incidence	Global	Female	40-44 years	Caries of permanent teeth	Percent	2021	0.0710331	0.0900193	0.0550596
47	Incidence	Global	Male	40-44 years	Caries of permanent teeth	Rate	2021	32405.4	41076.5	24994
48	Incidence	Global	Female	40-44 years	Caries of permanent teeth	Rate	2021	32787.7	41647.7	25175.6
49	Incidence	Global	Male	45-49 years	Caries of permanent teeth	Number	2021	6.70002e+07	8.46512e+07	5.32542e+07
50	Incidence	Global	Female	45-49 years	Caries of permanent teeth	Number	2021	6.71275e+07	8.49593e+07	5.31752e+07
51	Incidence	Global	Male	45-49 years	Caries of permanent teeth	Percent	2021	0.071773	0.0902915	0.0567347
52	Incidence	Global	Female	45-49 years	Caries of permanent teeth	Percent	2021	0.0657183	0.0829956	0.0525033
53	Incidence	Global	Male	45-49 years	Caries of permanent teeth	Rate	2021	28167.7	35588.3	22388.7
54	Incidence	Global	Female	45-49 years	Caries of permanent teeth	Rate	2021	28487	36054.3	22566
55	Incidence	Global	Male	50-54 years	Caries of permanent teeth	Number	2021	5.37907e+07	6.86198e+07	4.16663e+07
56	Incidence	Global	Female	50-54 years	Caries of permanent teeth	Number	2021	5.46272e+07	6.98147e+07	4.20996e+07
57	Incidence	Global	Male	50-54 years	Caries of permanent teeth	Percent	2021	0.0632381	0.0819532	0.0470042
58	Incidence	Global	Female	50-54 years	Caries of permanent teeth	Percent	2021	0.0589194	0.0762663	0.0440505
59	Incidence	Global	Male	50-54 years	Caries of permanent teeth	Rate	2021	24232.2	30912.5	18770.2
60	Incidence	Global	Female	50-54 years	Caries of permanent teeth	Rate	2021	24502.8	31315.1	18883.6
61	Incidence	Global	Male	55-59 years	Caries of permanent teeth	Number	2021	4.06279e+07	5.19823e+07	3.0836e+07
62	Incidence	Global	Female	55-59 years	Caries of permanent teeth	Number	2021	4.24426e+07	5.45305e+07	3.23315e+07
63	Incidence	Global	Male	55-59 years	Caries of permanent teeth	Percent	2021	0.0548272	0.0722789	0.0415413
64	Incidence	Global	Female	55-59 years	Caries of permanent teeth	Percent	2021	0.0516946	0.0685264	0.0390261
65	Incidence	Global	Male	55-59 years	Caries of permanent teeth	Rate	2021	20864.3	26695.3	15835.7
66	Incidence	Global	Female	55-59 years	Caries of permanent teeth	Rate	2021	21115.3	27129.1	16085.1
67	Incidence	Global	Male	60-64 years	Caries of permanent teeth	Number	2021	2.93358e+07	3.73314e+07	2.27019e+07
68	Incidence	Global	Female	60-64 years	Caries of permanent teeth	Number	2021	3.14626e+07	4.01254e+07	2.43431e+07
69	Incidence	Global	Male	60-64 years	Caries of permanent teeth	Percent	2021	0.0482474	0.0630917	0.036866
70	Incidence	Global	Female	60-64 years	Caries of permanent teeth	Percent	2021	0.0458204	0.0599682	0.0352329
71	Incidence	Global	Male	60-64 years	Caries of permanent teeth	Rate	2021	18861	24001.6	14595.8
72	Incidence	Global	Female	60-64 years	Caries of permanent teeth	Rate	2021	19124.9	24390.7	14797.3
73	Incidence	Global	Male	65-69 years	Caries of permanent teeth	Number	2021	2.19665e+07	2.81617e+07	1.74975e+07
74	Incidence	Global	Female	65-69 years	Caries of permanent teeth	Number	2021	2.4445e+07	3.15446e+07	1.95245e+07
75	Incidence	Global	Male	65-69 years	Caries of permanent teeth	Percent	2021	0.041897	0.054531	0.0326644
76	Incidence	Global	Female	65-69 years	Caries of permanent teeth	Percent	2021	0.0400549	0.0521169	0.0313262
77	Incidence	Global	Male	65-69 years	Caries of permanent teeth	Rate	2021	16662.3	21361.6	13272.5
78	Incidence	Global	Female	65-69 years	Caries of permanent teeth	Rate	2021	16974.6	21904.6	13557.8
79	Incidence	Global	Male	70+ years	Caries of permanent teeth	Number	2021	3.07534e+07	3.94094e+07	2.46852e+07
80	Incidence	Global	Female	70+ years	Caries of permanent teeth	Number	2021	3.91425e+07	4.95254e+07	3.14693e+07
81	Incidence	Global	Male	70+ years	Caries of permanent teeth	Percent	2021	0.032215	0.0408571	0.026089
82	Incidence	Global	Female	70+ years	Caries of permanent teeth	Percent	2021	0.0305026	0.038549	0.0247822
83	Incidence	Global	Male	70+ years	Caries of permanent teeth	Rate	2021	14144.5	18125.6	11353.5
84	Incidence	Global	Female	70+ years	Caries of permanent teeth	Rate	2021	14133.7	17882.7	11363
